# Supplementary material for: How epigenetic clocks tick: Unpacking the black box by deciphering biological pathways and transcriptomic signatures of accelerated aging
Source: Research Square preprint supplement (doi:10.21203/rs.3.rs-8844558/v1), 2026-03-16
Supplement: Supplementary file 1 [file 0a44635e1254e330ee25ed7f.xlsx]

## Sheet: a.Horvath
Gene Set	Description	Size	Leading Edge Number	ES	NES	P Value	FDR
R-HSA-162582	Signal Transduction	7	6	0.40604	1.2713	0.17919	0.18068
R-HSA-1430728	Metabolism	6	6	0.48837	1.4122	0.10078	0.22222

## Sheet: b.Hannum
Gene Set	Description	Size	Leading Edge Number	ES	NES	P Value	FDR
R-HSA-6798695	Neutrophil degranulation	13	12	0.86262	3.715	<2.2e-16	<2.2e-16
R-HSA-168249	Innate Immune System	19	13	0.62462	3.083	<2.2e-16	<2.2e-16
R-HSA-6803157	Antimicrobial peptides	5	5	0.91241	2.5037	<2.2e-16	0.00070863
R-HSA-168256	Immune System	28	14	0.44425	2.5038	<2.2e-16	0.00094484
R-HSA-1474244	Extracellular matrix organization	8	5	0.58673	1.9671	0.0039526	0.024093
R-HSA-2262752	Cellular responses to stress	5	5	0.64234	1.7356	0.023669	0.056488
R-HSA-8953897	Cellular responses to stimuli	5	5	0.64234	1.7356	0.023669	0.056488
R-HSA-109582	Hemostasis	5	3	0.5611	1.5861	0.053498	0.092279
R-HSA-202733	Cell surface interactions at the vascular wall	5	3	0.5611	1.5861	0.053498	0.092279
R-HSA-1280215	Cytokine Signaling in Immune system	6	6	0.50735	1.5388	0.053846	0.094054
R-HSA-449147	Signaling by Interleukins	6	6	0.50735	1.5388	0.053846	0.094054
R-HSA-392499	Metabolism of proteins	7	5	0.44591	1.4538	0.08866	0.12684

## Sheet: c.PhenoAge
Gene Set	Description	Size	Leading Edge Number	ES	NES	P Value	FDR
R-HSA-6798695	Neutrophil degranulation	39	27	0.44899	3.2238	<2.2e-16	<2.2e-16
R-HSA-168249	Innate Immune System	60	51	0.35009	3.0186	<2.2e-16	<2.2e-16
R-HSA-6803157	Antimicrobial peptides	8	8	0.80537	2.7815	<2.2e-16	<2.2e-16
R-HSA-168256	Immune System	95	77	0.26796	2.7073	<2.2e-16	<2.2e-16
R-HSA-73857	RNA Polymerase II Transcription	44	44	-0.3163	-2.378	0.0019802	0.0077439
R-HSA-74160	Gene expression (Transcription)	48	48	-0.31941	-2.4652	0.002079	0.0085182
R-HSA-212436	Generic Transcription Pathway	42	42	-0.31477	-2.3087	<2.2e-16	0.010325
R-HSA-2262752	Cellular responses to stress	22	21	0.37731	2.0842	0.0019881	0.034234
R-HSA-8953897	Cellular responses to stimuli	22	21	0.37731	2.0842	0.0019881	0.034234
R-HSA-9824446	Viral Infection Pathways	19	17	-0.36681	-1.9269	0.0041929	0.10551
R-HSA-69278	Cell Cycle, Mitotic	15	15	0.41818	1.8949	0.0077519	0.11108
R-HSA-1474244	Extracellular matrix organization	15	8	0.39873	1.842	0.0076923	0.12783
R-HSA-1643685	Disease	63	49	0.21293	1.8522	0.0037313	0.13464
R-HSA-2559583	Cellular Senescence	12	12	0.43341	1.7845	0.017613	0.16175
R-HSA-453279	Mitotic G1 phase and G1/S transition	6	6	0.58129	1.7585	0.037175	0.16617
R-HSA-1640170	Cell Cycle	19	18	0.3422	1.7383	0.021236	0.17066
R-HSA-9679506	SARS-CoV Infections	14	13	-0.39772	-1.814	0.020921	0.17253
R-HSA-9705683	SARS-CoV-2-host interactions	5	5	-0.62444	-1.7383	0.013566	0.21321

## Sheet: d.GrimAge
Gene Set	Description	Size	Leading Edge Number	ES	NES	P Value	FDR
R-HSA-6798695	Neutrophil degranulation	38	22	0.54969	2.2543	<2.2e-16	0.0032887
R-HSA-909733	Interferon alpha/beta signaling	13	11	0.66454	1.9784	<2.2e-16	0.045311
R-HSA-168256	Immune System	123	70	0.3908	2.0009	<2.2e-16	0.056456
R-HSA-168249	Innate Immune System	69	27	0.40213	1.8838	0.0024814	0.095646
R-HSA-1280215	Cytokine Signaling in Immune system	57	35	0.40969	1.8372	0.0012853	0.12037
R-HSA-913531	Interferon Signaling	29	11	0.47054	1.801	0.0042135	0.14032

## Sheet: e.DunedinPACE
Gene Set	Description	Size	Leading Edge Number	ES	NES	P Value	FDR
R-HSA-168249	Innate Immune System	245	165	0.27502	4.268	<2.2e-16	<2.2e-16
R-HSA-192823	Viral mRNA Translation	27	27	0.67287	4.0071	<2.2e-16	<2.2e-16
R-HSA-9633012	Response of EIF2AK4 (GCN2) to amino acid deficiency	26	26	0.67266	3.9614	<2.2e-16	<2.2e-16
R-HSA-156842	Eukaryotic Translation Elongation	26	26	0.67266	3.9614	<2.2e-16	<2.2e-16
R-HSA-156902	Peptide chain elongation	26	26	0.67266	3.9614	<2.2e-16	<2.2e-16
R-HSA-72764	Eukaryotic Translation Termination	26	26	0.67266	3.9614	<2.2e-16	<2.2e-16
R-HSA-168256	Immune System	439	275	0.20284	3.9172	<2.2e-16	<2.2e-16
R-HSA-975956	Nonsense Mediated Decay (NMD) independent of the Exon Junction Complex (EJC)	27	26	0.63808	3.8741	<2.2e-16	<2.2e-16
R-HSA-72689	Formation of a pool of free 40S subunits	28	27	0.63477	3.8516	<2.2e-16	<2.2e-16
R-HSA-6798695	Neutrophil degranulation	133	97	0.3241	3.8135	<2.2e-16	<2.2e-16
R-HSA-2408557	Selenocysteine synthesis	27	26	0.63642	3.795	<2.2e-16	<2.2e-16
R-HSA-2408522	Selenoamino acid metabolism	30	27	0.57712	3.6156	<2.2e-16	<2.2e-16
R-HSA-156827	L13a-mediated translational silencing of Ceruloplasmin expression	30	27	0.57349	3.6068	<2.2e-16	<2.2e-16
R-HSA-72706	GTP hydrolysis and joining of the 60S ribosomal subunit	30	27	0.57349	3.6068	<2.2e-16	<2.2e-16
R-HSA-8953897	Cellular responses to stimuli	147	100	0.27231	3.52	<2.2e-16	<2.2e-16
R-HSA-2262752	Cellular responses to stress	146	99	0.27002	3.4874	<2.2e-16	<2.2e-16
R-HSA-392499	Metabolism of proteins	379	315	0.18359	3.4361	<2.2e-16	<2.2e-16
R-HSA-72613	Eukaryotic Translation Initiation	32	27	0.51928	3.3331	<2.2e-16	<2.2e-16
R-HSA-72737	Cap-dependent Translation Initiation	32	27	0.51928	3.3331	<2.2e-16	<2.2e-16
R-HSA-9010553	Regulation of expression of SLITs and ROBOs	36	33	0.48856	3.3269	<2.2e-16	<2.2e-16
R-HSA-168273	Influenza Viral RNA Transcription and Replication	36	29	0.48639	3.2942	<2.2e-16	<2.2e-16
R-HSA-6803157	Antimicrobial peptides	20	18	0.63074	3.2897	<2.2e-16	<2.2e-16
R-HSA-9711097	Cellular response to starvation	37	31	0.46913	3.2146	<2.2e-16	<2.2e-16
R-HSA-927802	Nonsense-Mediated Decay (NMD)	32	26	0.49278	3.2046	<2.2e-16	<2.2e-16
R-HSA-975957	Nonsense Mediated Decay (NMD) enhanced by the Exon Junction Complex (EJC)	32	26	0.49278	3.2046	<2.2e-16	<2.2e-16
R-HSA-1799339	SRP-dependent cotranslational protein targeting to membrane	33	27	0.47954	3.1863	<2.2e-16	<2.2e-16
R-HSA-376176	Signaling by ROBO receptors	42	36	0.43347	3.1442	<2.2e-16	<2.2e-16
R-HSA-1280215	Cytokine Signaling in Immune system	147	100	0.23848	3.0448	<2.2e-16	<2.2e-16
R-HSA-449147	Signaling by Interleukins	81	57	0.30339	3.0335	<2.2e-16	<2.2e-16
R-HSA-168255	Influenza Infection	43	40	0.40576	2.9963	<2.2e-16	<2.2e-16
R-HSA-8953854	Metabolism of RNA	152	151	0.23143	2.9839	<2.2e-16	<2.2e-16
R-HSA-1643685	Disease	336	225	0.16579	2.9629	<2.2e-16	<2.2e-16
R-HSA-9824446	Viral Infection Pathways	154	136	0.22426	2.9456	<2.2e-16	<2.2e-16
R-HSA-983169	Class I MHC mediated antigen processing & presentation	92	82	0.26651	2.7749	<2.2e-16	3.7842e-05
R-HSA-72766	Translation	58	57	0.31874	2.7095	<2.2e-16	0.0001838
R-HSA-597592	Post-translational protein modification	284	234	0.16021	2.6607	<2.2e-16	0.0003574
R-HSA-9692914	SARS-CoV-1-host interactions	22	21	0.46989	2.5983	<2.2e-16	0.00052161
R-HSA-5663205	Infectious disease	189	158	0.17984	2.5823	<2.2e-16	0.00060946
R-HSA-422475	Axon guidance	98	64	0.24159	2.566	<2.2e-16	0.0006928
R-HSA-9735869	SARS-CoV-1 modulates host translation machinery	10	10	0.66928	2.5547	<2.2e-16	0.00073982
R-HSA-166016	Toll Like Receptor 4 (TLR4) Cascade	33	28	0.39256	2.5406	<2.2e-16	0.00091006
R-HSA-72203	Processing of Capped Intron-Containing Pre-mRNA	61	50	-0.29047	-2.841	<2.2e-16	0.0012671
R-HSA-168898	Toll-like Receptor Cascades	38	30	0.36241	2.5065	<2.2e-16	0.0014092
R-HSA-8868773	rRNA processing in the nucleus and cytosol	55	55	0.30013	2.483	<2.2e-16	0.0017545
R-HSA-72312	rRNA processing	56	56	0.30022	2.4877	<2.2e-16	0.0017654
R-HSA-72695	Formation of the ternary complex, and subsequently, the 43S complex	12	11	0.58609	2.464	<2.2e-16	0.0018585
R-HSA-74160	Gene expression (Transcription)	264	238	0.1489	2.4571	<2.2e-16	0.00193
R-HSA-6785807	Interleukin-4 and Interleukin-13 signaling	25	20	0.42007	2.4436	<2.2e-16	0.0022174
R-HSA-6791226	Major pathway of rRNA processing in the nucleolus and cytosol	52	52	0.29984	2.4223	<2.2e-16	0.0025465
R-HSA-1640170	Cell Cycle	121	108	0.20413	2.412	<2.2e-16	0.0027833
R-HSA-9675108	Nervous system development	101	64	0.22251	2.3845	<2.2e-16	0.0030879
R-HSA-198933	Immunoregulatory interactions between a Lymphoid and a non-Lymphoid cell	30	21	-0.39665	-2.6629	<2.2e-16	0.0050684
R-HSA-72163	mRNA Splicing - Major Pathway	50	41	-0.28954	-2.4914	<2.2e-16	0.010137
R-HSA-72172	mRNA Splicing	50	41	-0.28954	-2.4914	<2.2e-16	0.010137
R-HSA-1428517	The citric acid (TCA) cycle and respiratory electron transport	36	36	0.31256	2.1388	<2.2e-16	0.016119
R-HSA-1650814	Collagen biosynthesis and modifying enzymes	14	11	-0.50718	-2.3102	0.0045249	0.016916
R-HSA-112316	Neuronal System	55	32	-0.24802	-2.3112	<2.2e-16	0.018725
R-HSA-8948216	Collagen chain trimerization	9	7	-0.64016	-2.3146	0.0042735	0.020432
R-HSA-69190	DNA strand elongation	12	12	-0.53438	-2.3261	<2.2e-16	0.020998
R-HSA-6790901	rRNA modification in the nucleus and cytosol	17	16	-0.44163	-2.2602	0.0023697	0.022577
R-HSA-6794361	Neurexins and neuroligins	8	7	-0.64157	-2.3296	<2.2e-16	0.023969
R-HSA-419037	NCAM1 interactions	10	8	-0.6164	-2.3417	<2.2e-16	0.025975
R-HSA-73933	Resolution of Abasic Sites (AP sites)	10	10	-0.55632	-2.1948	<2.2e-16	0.034423
R-HSA-3000171	Non-integrin membrane-ECM interactions	13	8	-0.47566	-2.1371	0.0087527	0.042583
R-HSA-6794362	Protein-protein interactions at synapses	13	10	-0.47742	-2.1235	<2.2e-16	0.043377
R-HSA-110373	Resolution of AP sites via the multiple-nucleotide patch replacement pathway	8	8	-0.60176	-2.1378	0.0042553	0.045518
R-HSA-1474290	Collagen formation	16	11	-0.40462	-2.0362	0.010799	0.071591
R-HSA-400042	Adrenaline,noradrenaline inhibits insulin secretion	6	5	-0.64229	-2.0092	0.0048544	0.08061
R-HSA-3000178	ECM proteoglycans	15	10	-0.41744	-1.9907	0.011287	0.084931
R-HSA-202430	Translocation of ZAP-70 to Immunological synapse	7	6	-0.59182	-1.975	0.011086	0.088163
R-HSA-6805567	Keratinization	13	9	-0.44022	-1.8849	0.010989	0.13639
R-HSA-6809371	Formation of the cornified envelope	13	9	-0.44022	-1.8849	0.010989	0.13639
R-HSA-5651801	PCNA-Dependent Long Patch Base Excision Repair	6	6	-0.60138	-1.8667	0.0085837	0.14295
R-HSA-216083	Integrin cell surface interactions	18	9	-0.35823	-1.8203	0.019185	0.1758
R-HSA-69186	Lagging Strand Synthesis	7	7	-0.53354	-1.7705	0.017279	0.18303
R-HSA-9609507	Protein localization	31	27	-0.25961	-1.7821	0.012285	0.18521
R-HSA-72306	tRNA processing	14	13	-0.38189	-1.788	0.022676	0.18626
R-HSA-1474244	Extracellular matrix organization	55	21	-0.19441	-1.8019	0.020833	0.18766
R-HSA-72202	Transport of Mature Transcript to Cytoplasm	13	12	-0.39772	-1.7712	0.023256	0.18862
R-HSA-418594	G alpha (i) signalling events	37	15	-0.24246	-1.7915	0.019277	0.19024
R-HSA-449836	Other interleukin signaling	5	5	-0.60276	-1.7357	0.023504	0.20486
R-HSA-9709957	Sensory Perception	25	14	-0.28783	-1.7279	0.012788	0.20691
R-HSA-3781865	Diseases of glycosylation	24	19	-0.28416	-1.7357	0.017544	0.21163
R-HSA-6804758	Regulation of TP53 Activity through Acetylation	10	9	-0.41843	-1.6932	0.028446	0.23281
R-HSA-189200	Cellular hexose transport	6	5	-0.53535	-1.6783	0.029106	0.23725
R-HSA-202427	Phosphorylation of CD3 and TCR zeta chains	8	6	-0.47971	-1.6941	0.024554	0.2389
R-HSA-372790	Signaling by GPCR	92	34	-0.14469	-1.6821	0.037249	0.23926
R-HSA-5696397	Gap-filling DNA repair synthesis and ligation in GG-NER	9	8	-0.44004	-1.6633	0.041943	0.24207
R-HSA-379724	tRNA Aminoacylation	9	9	-0.45075	-1.6684	0.029915	0.24251
