# Supplementary material for: How epigenetic clocks tick: Unpacking the black box by deciphering biological pathways and transcriptomic signatures of accelerated aging
Source: Research Square preprint supplement (doi:10.21203/rs.3.rs-8844558/v1), 2026-03-16
Supplement: Supplementary file 2 [file 1673bdf55c5c9fd00c64ee8e.xlsx]

## Sheet: GO_75clusters
GO.cluster	IC	GO.ID	term	definition	DunedinPACE.genes_frequency	DunedinPACE.pvalue	DunedinPACE.-log10_pvalue	DunedinPACE.Significant_genes	DunedinPACE.Significant_genes_symbol	GrimAge.genes_frequency	GrimAge.pvalue	GrimAge.-log10_pvalue	GrimAge.Significant_genes	GrimAge.Significant_genes_symbol	Horvath.genes_frequency	Horvath.pvalue	Horvath.-log10_pvalue	Horvath.Significant_genes	Horvath.Significant_genes_symbol	PhenoAge.genes_frequency	PhenoAge.pvalue	PhenoAge.-log10_pvalue	PhenoAge.Significant_genes	PhenoAge.Significant_genes_symbol	Hannum.genes_frequency	Hannum.pvalue	Hannum.-log10_pvalue	Hannum.Significant_genes	Hannum.Significant_genes_symbol
1	7.42	GO:0001892	embryonic placenta development	The embryonically driven process whose specific outcome is the progression of the placenta over time, from its formation to the mature structure. The placenta is an organ of metabolic interchange between fetus and mother, partly of embryonic origin and partly of maternal origin.	22.472% (20/89)	0.264596	0.58	NA	NA	6.742% (6/89)	0.0183653	1.74	NA	NA	0% (0/89)	0.00920767	2.04	NA	NA	2.247% (2/89)	0.0139294	1.86	NA	NA	2.247% (2/89)	0.0263206	1.58	NA	NA
1	6.84	GO:0001890	placenta development	The process whose specific outcome is the progression of the placenta over time, from its formation to the mature structure. The placenta is an organ of metabolic interchange between fetus and mother, partly of embryonic origin and partly of maternal origin.	20.53% (31/151)	0.0841222	1.08	NA	NA	7.285% (11/151)	0.0140633	1.85	NA	NA	0% (0/151)	0.0447686	1.35	NA	NA	1.987% (3/151)	0.00162256	2.79	ENSG00000112062;ENSG00000136634;ENSG00000163251	MAPK14;IL10;FZD5	1.325% (2/151)	0.00272028	2.57	ENSG00000114315;ENSG00000129757	HES1;CDKN1C
1	7.23	GO:0008585	female gonad development	The process whose specific outcome is the progression of the female gonad over time, from its formation to the mature structure.	11.765% (12/102)	0.00407459	2.39	ENSG00000104918;ENSG00000106003;ENSG00000118689;ENSG00000122641;ENSG00000123610;ENSG00000138413;ENSG00000145191;ENSG00000150347;ENSG00000154734;ENSG00000157404;ENSG00000173757;ENSG00000184347	RETN;LFNG;FOXO3;INHBA;TNFAIP6;IDH1;EIF2B5;ARID5B;ADAMTS1;KIT;STAT5B;SLIT3	1.961% (2/102)	0.0072973	2.14	ENSG00000123610;ENSG00000150347	TNFAIP6;ARID5B	0% (0/102)	0.00990968	2	NA	NA	2.941% (3/102)	0.0200876	1.7	NA	NA	0.98% (1/102)	0.0144669	1.84	NA	NA
1	9.91	GO:0033327	Leydig cell differentiation	The process in which a relatively unspecialized cell acquires specialized structural and/or functional features of a Leydig cell. A Leydig cell is a testosterone-secreting cell in the interstitial area, between the seminiferous tubules, in the testis.	0% (0/11)	0.0079114	2.1	NA	NA	0% (0/11)	0.0419603	1.38	NA	NA	0% (0/11)	0.0584304	1.23	NA	NA	0% (0/11)	0.0464655	1.33	NA	NA	0% (0/11)	0.0557434	1.25	NA	NA
1	6.91	GO:0008584	male gonad development	The process whose specific outcome is the progression of the male gonad over time, from its formation to the mature structure.	18.667% (28/150)	0.0486839	1.31	NA	NA	4.667% (7/150)	0.00164289	2.78	ENSG00000081479;ENSG00000121989;ENSG00000138061;ENSG00000145545;ENSG00000150347;ENSG00000164104;ENSG00000187554	LRP2;ACVR2A;CYP1B1;SRD5A1;ARID5B;HMGB2;TLR5	0% (0/150)	0.000278725	3.55	NA	NA	5.333% (8/150)	0.00279265	2.55	ENSG00000009307;ENSG00000066279;ENSG00000122641;ENSG00000143545;ENSG00000145545;ENSG00000157404;ENSG00000187554;ENSG00000198087	CSDE1;ASPM;INHBA;RAB13;SRD5A1;KIT;TLR5;CD2AP	0.667% (1/150)	0.000396881	3.4	ENSG00000122641	INHBA
1	8.7	GO:0035162	embryonic hemopoiesis	The stages of blood cell formation that take place within the embryo.	25% (6/24)	0.00603325	2.22	ENSG00000104375;ENSG00000111252;ENSG00000125686;ENSG00000157404;ENSG00000163513;ENSG00000179348	STK3;SH2B3;MED1;KIT;TGFBR2;GATA2	4.167% (1/24)	0.000378705	3.42	ENSG00000179348	GATA2	0% (0/24)	0.000554125	3.26	NA	NA	4.167% (1/24)	0.000424843	3.37	ENSG00000157404	KIT	0% (0/24)	0.000524302	3.28	NA	NA
1	5.51	GO:0048568	embryonic organ development	Development, taking place during the embryonic phase, of a tissue or tissues that work together to perform a specific function or functions. Development pertains to the process whose specific outcome is the progression of a structure over time, from its formation to the mature structure. Organs are commonly observed as visibly distinct structures, but may also exist as loosely associated clusters…	12.554% (58/462)	0.0335701	1.47	NA	NA	3.247% (15/462)	0.0340807	1.47	NA	NA	0.649% (3/462)	0.0513675	1.29	NA	NA	0.866% (4/462)	0.0014365	2.84	ENSG00000136634;ENSG00000157404;ENSG00000163251;ENSG00000183691	IL10;KIT;FZD5;NOG	1.082% (5/462)	0.0644285	1.19	NA	NA
1	7.24	GO:0048534	hematopoietic or lymphoid organ development	The process whose specific outcome is the progression of any organ involved in hematopoiesis (also known as hemopoiesis) or lymphoid cell activation over time, from its formation to the mature structure. Such development includes differentiation of resident cell types (stromal cells) and of migratory cell types dependent on the unique microenvironment afforded by the organ for their proper differ…	15% (15/100)	0.011409	1.94	NA	NA	3% (3/100)	0.00833551	2.08	ENSG00000008083;ENSG00000147883;ENSG00000182389	JARID2;CDKN2B;CACNB4	0% (0/100)	0.00592684	2.23	NA	NA	3% (3/100)	0.0121594	1.92	NA	NA	2% (2/100)	0.0132204	1.88	NA	NA
1	7.18	GO:0002200	somatic diversification of immune receptors	The somatic process allowing for the production of immune receptors whose specificity is not encoded in the germline genomic sequences.	23.377% (18/77)	0.358033	0.45	NA	NA	3.896% (3/77)	0.0366778	1.44	NA	NA	0% (0/77)	0.00951211	2.02	NA	NA	3.896% (3/77)	0.0321811	1.49	NA	NA	0% (0/77)	0.00849617	2.07	NA	NA
1	6.24	GO:0002520	immune system development	The process whose specific outcome is the progression of an organismal system whose objective is to provide calibrated responses by an organism to a potential internal or invasive threat, over time, from its formation to the mature structure. A system is a regularly interacting or interdependent group of organs or tissues that work together to carry out a given biological process.	19.5% (39/200)	0.0486773	1.31	NA	NA	5% (10/200)	0.263941	0.58	NA	NA	0% (0/200)	0.412097	0.39	NA	NA	3.5% (7/200)	0.0043578	2.36	ENSG00000051341;ENSG00000056586;ENSG00000072274;ENSG00000120217;ENSG00000136634;ENSG00000147883;ENSG00000182389	POLQ;RC3H2;TFRC;CD274;IL10;CDKN2B;CACNB4	1.5% (3/200)	0.061597	1.21	NA	NA
1	9.17	GO:1902036	regulation of hematopoietic stem cell differentiation	NA	52.941% (9/17)	0.493206	0.31	NA	NA	23.529% (4/17)	0.317587	0.5	NA	NA	0% (0/17)	0.0051265	2.29	NA	NA	0% (0/17)	0.00425659	2.37	NA	NA	0% (0/17)	0.00493764	2.31	NA	NA
1	8.32	GO:0048821	erythrocyte development	The process whose specific outcome is the progression of an erythrocyte over time, from its formation to the mature structure.	37.209% (16/43)	0.365134	0.44	NA	NA	0% (0/43)	0.000201294	3.7	NA	NA	0% (0/43)	0.000572139	3.24	NA	NA	6.977% (3/43)	0.00270687	2.57	ENSG00000112077;ENSG00000135776;ENSG00000172331	RHAG;ABCB10;BPGM	0% (0/43)	0.000494688	3.31	NA	NA
1	6.85	GO:0030218	erythrocyte differentiation	The process in which a myeloid precursor cell acquires specializes features of an erythrocyte.	30.597% (41/134)	0.0982092	1.01	NA	NA	6.716% (9/134)	0.00947633	2.02	ENSG00000086065;ENSG00000100320;ENSG00000105810;ENSG00000112062;ENSG00000121989;ENSG00000147324;ENSG00000164104;ENSG00000179348;ENSG00000185650	CHMP5;RBFOX2;CDK6;MAPK14;ACVR2A;MFHAS1;HMGB2;GATA2;ZFP36L1	0% (0/134)	0.000468136	3.33	NA	NA	6.716% (9/134)	0.00292411	2.53	ENSG00000100320;ENSG00000112062;ENSG00000112077;ENSG00000122641;ENSG00000135776;ENSG00000147324;ENSG00000157404;ENSG00000169877;ENSG00000172331	RBFOX2;MAPK14;RHAG;INHBA;ABCB10;MFHAS1;KIT;AHSP;BPGM	0.746% (1/134)	0.000943906	3.03	ENSG00000122641	INHBA
1	7.04	GO:0002244	hematopoietic progenitor cell differentiation	The process in which precursor cell type acquires the specialized features of a hematopoietic progenitor cell, a class of cell types including myeloid progenitor cells and lymphoid progenitor cells.	21.739% (30/138)	0.0605367	1.22	NA	NA	7.246% (10/138)	0.00654342	2.18	ENSG00000055332;ENSG00000078747;ENSG00000105810;ENSG00000115904;ENSG00000116044;ENSG00000138642;ENSG00000164488;ENSG00000166428;ENSG00000179348;ENSG00000255833	EIF2AK2;ITCH;CDK6;SOS1;NFE2L2;HERC6;DACT2;PLD4;GATA2;TIFAB	0% (0/138)	0.000480016	3.32	NA	NA	3.623% (5/138)	0.00359946	2.44	ENSG00000011426;ENSG00000122641;ENSG00000131747;ENSG00000157404;ENSG00000166428	ANLN;INHBA;TOP2A;KIT;PLD4	2.174% (3/138)	0.00275208	2.56	ENSG00000114315;ENSG00000122641;ENSG00000166428	HES1;INHBA;PLD4
1	6.17	GO:0002573	myeloid leukocyte differentiation	The process in which a relatively unspecialized myeloid precursor cell acquires the specialized features of any cell of the myeloid leukocyte lineage.	20.502% (49/239)	0.0521326	1.28	NA	NA	7.531% (18/239)	0.00994028	2	ENSG00000012223;ENSG00000105810;ENSG00000105855;ENSG00000112062;ENSG00000113520;ENSG00000123610;ENSG00000123685;ENSG00000132170;ENSG00000135898;ENSG00000163565;ENSG00000163737;ENSG00000164935;ENSG00000172936;ENSG00000179348;ENSG00000185650;ENSG00000196126;ENSG00000211891;ENSG00000216588	LTF;CDK6;ITGB8;MAPK14;IL4;TNFAIP6;BATF3;PPARG;GPR55;IFI16;PF4;DCSTAMP;MYD88;GATA2;ZFP36L1;HLA-DRB1;IGHE;IGSF23	0% (0/239)	0.000366057	3.44	NA	NA	2.929% (7/239)	0.005944	2.23	ENSG00000012223;ENSG00000072274;ENSG00000112062;ENSG00000122641;ENSG00000157404;ENSG00000163565;ENSG00000178752	LTF;TFRC;MAPK14;INHBA;KIT;IFI16;ERFE	1.255% (3/239)	0.00116994	2.93	ENSG00000012223;ENSG00000122641;ENSG00000133424	LTF;INHBA;LARGE1
1	7.34	GO:0003407	neural retina development	The progression of the neural retina over time from its initial formation to the mature structure. The neural retina is the part of the retina that contains neurons and photoreceptor cells.	12.941% (11/85)	0.00207022	2.68	ENSG00000005513;ENSG00000057657;ENSG00000058668;ENSG00000082014;ENSG00000092200;ENSG00000104237;ENSG00000132932;ENSG00000148204;ENSG00000150625;ENSG00000163349;ENSG00000175544	SOX8;PRDM1;ATP2B4;SMARCD3;RPGRIP1;RP1;ATP8A2;CRB2;GPM6A;HIPK1;CABP4	7.059% (6/85)	0.00907783	2.04	ENSG00000057657;ENSG00000082014;ENSG00000092200;ENSG00000095464;ENSG00000150625;ENSG00000175544	PRDM1;SMARCD3;RPGRIP1;PDE6C;GPM6A;CABP4	0% (0/85)	0.000742785	3.13	NA	NA	2.353% (2/85)	0.00146663	2.83	ENSG00000082014;ENSG00000092200	SMARCD3;RPGRIP1	2.353% (2/85)	0.00295616	2.53	ENSG00000114315;ENSG00000133424	HES1;LARGE1
1	6.6	GO:0060041	retina development in camera-type eye	The process whose specific outcome is the progression of the retina over time, from its formation to the mature structure. The retina is the innermost layer or coating at the back of the eyeball, which is sensitive to light and in which the optic nerve terminates.	16.265% (27/166)	0.00931444	2.03	ENSG00000005513;ENSG00000007372;ENSG00000057657;ENSG00000058668;ENSG00000081148;ENSG00000082014;ENSG00000087085;ENSG00000092200;ENSG00000104237;ENSG00000114391;ENSG00000123349;ENSG00000125686;ENSG00000132386;ENSG00000132932;ENSG00000133256;ENSG00000135049;ENSG00000138061;ENSG00000148204;ENSG00000150625;ENSG00000153395;ENSG00000162599;ENSG00000163349;ENSG00000168389;ENSG00000169504;ENSG00000175544…	SOX8;PAX6;PRDM1;ATP2B4;IMPG2;SMARCD3;ACHE;RPGRIP1;RP1;RPL24;PFDN5;MED1;SERPINF1;ATP8A2;PDE6B;AGTPBP1;CYP1B1;CRB2;GPM6A;LPCAT1;NFIA;HIPK1;MFSD2A;CLIC4;CABP4;NECTIN3;BMPR2	4.819% (8/166)	0.0010762	2.97	ENSG00000057657;ENSG00000082014;ENSG00000092200;ENSG00000095464;ENSG00000099250;ENSG00000138061;ENSG00000150625;ENSG00000175544	PRDM1;SMARCD3;RPGRIP1;PDE6C;NRP1;CYP1B1;GPM6A;CABP4	0% (0/166)	0.000501468	3.3	NA	NA	1.807% (3/166)	0.000643594	3.19	ENSG00000082014;ENSG00000092200;ENSG00000132386	SMARCD3;RPGRIP1;SERPINF1	1.205% (2/166)	0.000439896	3.36	ENSG00000114315;ENSG00000133424	HES1;LARGE1
1	5.81	GO:0043010	camera-type eye development	The process whose specific outcome is the progression of the camera-type eye over time, from its formation to the mature structure. The camera-type eye is an organ of sight that receives light through an aperture and focuses it through a lens, projecting it on a photoreceptor field.	16.193% (57/352)	0.0108935	1.96	NA	NA	3.693% (13/352)	0.0207335	1.68	NA	NA	0% (0/352)	0.00542493	2.27	NA	NA	1.989% (7/352)	0.0108495	1.96	NA	NA	1.705% (6/352)	0.0333168	1.48	NA	NA
1	5.63	GO:0001654	eye development	The process whose specific outcome is the progression of the eye over time, from its formation to the mature structure. The eye is the organ of sight.	16.541% (66/399)	0.0340502	1.47	NA	NA	3.258% (13/399)	0.0129327	1.89	NA	NA	0% (0/399)	0.27925	0.55	NA	NA	1.754% (7/399)	0.00821049	2.09	ENSG00000082014;ENSG00000092200;ENSG00000122641;ENSG00000132386;ENSG00000138685;ENSG00000151012;ENSG00000163251	SMARCD3;RPGRIP1;INHBA;SERPINF1;FGF2;SLC7A11;FZD5	1.504% (6/399)	0.0293492	1.53	NA	NA
1	10.36	GO:0048050	post-embryonic eye morphogenesis	The process, occurring after embryonic development, by which the anatomical structures of the eye are generated and organized. The eye is the organ of sight.	0% (0/7)	0.00639482	2.19	NA	NA	0% (0/7)	0.0135031	1.87	NA	NA	0% (0/7)	0.015699	1.8	NA	NA	0% (0/7)	0.0141254	1.85	NA	NA	0% (0/7)	0.0153673	1.81	NA	NA
1	6.86	GO:0048593	camera-type eye morphogenesis	The process in which the anatomical structures of the eye are generated and organized. The camera-type eye is an organ of sight that receives light through an aperture and focuses it through a lens, projecting it on a photoreceptor field.	17.91% (24/134)	0.0325176	1.49	NA	NA	2.985% (4/134)	0.00458696	2.34	ENSG00000057657;ENSG00000092200;ENSG00000095464;ENSG00000175544	PRDM1;RPGRIP1;PDE6C;CABP4	0% (0/134)	0.00364724	2.44	NA	NA	1.493% (2/134)	0.00404406	2.39	ENSG00000092200;ENSG00000163251	RPGRIP1;FZD5	0.746% (1/134)	0.00521432	2.28	ENSG00000133424	LARGE1
1	7.53	GO:0021766	hippocampus development	The progression of the hippocampus over time from its initial formation until its mature state.	22.105% (21/95)	0.0711555	1.15	NA	NA	6.316% (6/95)	0.00213544	2.67	ENSG00000105810;ENSG00000138772;ENSG00000145545;ENSG00000157193;ENSG00000167680;ENSG00000277586	CDK6;ANXA3;SRD5A1;LRP8;SEMA6B;NEFL	0% (0/95)	0.000211967	3.67	NA	NA	4.211% (4/95)	0.00158902	2.8	ENSG00000106462;ENSG00000138772;ENSG00000145545;ENSG00000149557	EZH2;ANXA3;SRD5A1;FEZ1	1.053% (1/95)	0.000380089	3.42	ENSG00000133424	LARGE1
1	7.01	GO:0021987	cerebral cortex development	The progression of the cerebral cortex over time from its initial formation until its mature state. The cerebral cortex is the outer layered region of the telencephalon.	20.472% (26/127)	0.0519797	1.28	NA	NA	7.087% (9/127)	0.0153958	1.81	NA	NA	0% (0/127)	0.00205032	2.69	NA	NA	3.15% (4/127)	0.00370569	2.43	ENSG00000066279;ENSG00000137210;ENSG00000145545;ENSG00000196159	ASPM;TMEM14B;SRD5A1;FAT4	0% (0/127)	0.00157232	2.8	NA	NA
1	7.43	GO:0021536	diencephalon development	The process whose specific outcome is the progression of the diencephalon over time, from its formation to the mature structure. The diencephalon is the paired caudal parts of the prosencephalon from which the thalamus, hypothalamus, epithalamus and subthalamus are derived; these regions regulate autonomic, visceral and endocrine function, and process information directed to the cerebral cortex.	7.407% (6/81)	0.00247189	2.61	ENSG00000007372;ENSG00000128918;ENSG00000145545;ENSG00000168036;ENSG00000179348;ENSG00000183691	PAX6;ALDH1A2;SRD5A1;CTNNB1;GATA2;NOG	4.938% (4/81)	0.00437218	2.36	ENSG00000099250;ENSG00000145545;ENSG00000179348;ENSG00000183691	NRP1;SRD5A1;GATA2;NOG	0% (0/81)	0.00258607	2.59	NA	NA	3.704% (3/81)	0.00425985	2.37	ENSG00000138685;ENSG00000145545;ENSG00000183691	FGF2;SRD5A1;NOG	1.235% (1/81)	0.0044378	2.35	ENSG00000114315	HES1
1	8.1	GO:0021983	pituitary gland development	The progression of the pituitary gland over time from its initial formation until its mature state. The pituitary gland is an endocrine gland that secretes hormones that regulate many other glands.	11.628% (5/43)	0.00408367	2.39	ENSG00000007372;ENSG00000128918;ENSG00000145545;ENSG00000179348;ENSG00000183691	PAX6;ALDH1A2;SRD5A1;GATA2;NOG	6.977% (3/43)	0.0234913	1.63	NA	NA	0% (0/43)	0.0122979	1.91	NA	NA	6.977% (3/43)	0.0601234	1.22	NA	NA	2.326% (1/43)	0.0256439	1.59	NA	NA
1	6.66	GO:0030902	hindbrain development	The process whose specific outcome is the progression of the hindbrain over time, from its formation to the mature structure. The hindbrain is the posterior of the three primary divisions of the developing chordate brain, or the corresponding part of the adult brain (in vertebrates, includes the cerebellum, pons, and medulla oblongata and controls the autonomic functions and equilibrium).	12.963% (21/162)	0.00815041	2.09	ENSG00000007372;ENSG00000066032;ENSG00000073050;ENSG00000095139;ENSG00000095397;ENSG00000100320;ENSG00000105426;ENSG00000106462;ENSG00000128881;ENSG00000128918;ENSG00000134909;ENSG00000135049;ENSG00000135919;ENSG00000150093;ENSG00000154928;ENSG00000168036;ENSG00000172409;ENSG00000179348;ENSG00000183044;ENSG00000183691;ENSG00000278195	PAX6;CTNNA2;XRCC1;ARCN1;WHRN;RBFOX2;PTPRS;EZH2;TTBK2;ALDH1A2;ARHGAP32;AGTPBP1;SERPINE2;ITGB1;EPHB1;CTNNB1;CLP1;GATA2;ABAT;NOG;SSTR3	3.704% (6/162)	0.0359695	1.44	NA	NA	0% (0/162)	0.0210551	1.68	NA	NA	3.704% (6/162)	0.0548009	1.26	NA	NA	1.852% (3/162)	0.0569696	1.24	NA	NA
1	7.41	GO:0030901	midbrain development	The process whose specific outcome is the progression of the midbrain over time, from its formation to the mature structure. The midbrain is the middle division of the three primary divisions of the developing chordate brain or the corresponding part of the adult brain (in vertebrates, includes a ventral part containing the cerebral peduncles and a dorsal tectum containing the corpora quadrigemin…	15.957% (15/94)	0.00412798	2.38	ENSG00000006459;ENSG00000066468;ENSG00000088986;ENSG00000108379;ENSG00000108953;ENSG00000115904;ENSG00000119487;ENSG00000134333;ENSG00000137757;ENSG00000143869;ENSG00000151208;ENSG00000154723;ENSG00000165795;ENSG00000166165;ENSG00000168036	KDM7A;FGFR2;DYNLL1;WNT3;YWHAE;SOS1;MAPKAP1;LDHA;CASP5;GDF7;DLG5;ATP5PF;NDRG2;CKB;CTNNB1	4.255% (4/94)	0.000531243	3.27	ENSG00000115904;ENSG00000134333;ENSG00000165795;ENSG00000166165	SOS1;LDHA;NDRG2;CKB	1.064% (1/94)	8.27e-06	5.08	ENSG00000114450	GNB4	4.255% (4/94)	0.00124091	2.91	ENSG00000088986;ENSG00000128245;ENSG00000134333;ENSG00000138685	DYNLL1;YWHAH;LDHA;FGF2	1.064% (1/94)	0.000602724	3.22	ENSG00000114315	HES1
1	8.39	GO:0021762	substantia nigra development	The progression of the substantia nigra over time from its initial formation until its mature state. The substantia nigra is the layer of gray substance that separates the posterior parts of the cerebral peduncles (tegmentum mesencephali) from the anterior parts; it normally includes a posterior compact part with many pigmented cells (pars compacta) and an anterior reticular part whose cells cont…	17.021% (8/47)	0.031905	1.5	NA	NA	6.383% (3/47)	0.0100941	2	NA	NA	2.128% (1/47)	0.0181235	1.74	NA	NA	8.511% (4/47)	0.100429	1	NA	NA	0% (0/47)	0.00672965	2.17	NA	NA
1	6.99	GO:0048565	digestive tract development	The process whose specific outcome is the progression of the digestive tract over time, from its formation to the mature structure. The digestive tract is the anatomical structure through which food passes and is processed.	10.687% (14/131)	0.00133325	2.88	ENSG00000057657;ENSG00000066468;ENSG00000105429;ENSG00000106392;ENSG00000128918;ENSG00000136160;ENSG00000138002;ENSG00000139687;ENSG00000145431;ENSG00000157404;ENSG00000163251;ENSG00000168036;ENSG00000181704;ENSG00000196159	PRDM1;FGFR2;MEGF8;C1GALT1;ALDH1A2;EDNRB;IFT172;RB1;PDGFC;KIT;FZD5;CTNNB1;YIPF6;FAT4	1.527% (2/131)	0.0005654	3.25	ENSG00000057657;ENSG00000196159	PRDM1;FAT4	0% (0/131)	0.000632494	3.2	NA	NA	2.29% (3/131)	0.000331279	3.48	ENSG00000157404;ENSG00000163251;ENSG00000196159	KIT;FZD5;FAT4	0.763% (1/131)	0.00126344	2.9	ENSG00000114315	HES1
1	8.06	GO:0048546	digestive tract morphogenesis	The process in which the anatomical structures of the digestive tract are generated and organized. The digestive tract is the anatomical structure through which food passes and is processed.	4.082% (2/49)	0.000114034	3.94	ENSG00000066468;ENSG00000168036	FGFR2;CTNNB1	0% (0/49)	0.00211247	2.68	NA	NA	0% (0/49)	0.00570794	2.24	NA	NA	0% (0/49)	0.00284885	2.55	NA	NA	0% (0/49)	0.00496439	2.3	NA	NA
1	6.84	GO:0042552	myelination	The process in which myelin sheaths are formed and maintained around neurons. Oligodendrocytes in the brain and spinal cord and Schwann cells in the peripheral nervous system wrap axons with compact layers of their plasma membrane. Adjacent myelin segments are separated by a non-myelinated stretch of axon called a node of Ranvier.	18.121% (27/149)	0.0204586	1.69	NA	NA	2.685% (4/149)	0.00493017	2.31	ENSG00000112414;ENSG00000115904;ENSG00000143753;ENSG00000145362	ADGRG6;SOS1;DEGS1;ANK2	0% (0/149)	0.00440273	2.36	NA	NA	1.342% (2/149)	0.00439632	2.36	ENSG00000047597;ENSG00000078124	XK;ACER3	1.342% (2/149)	0.010724	1.97	NA	NA
1	6.8	GO:0008366	axon ensheathment	Any process in which the axon of a neuron is insulated, and that insulation maintained, thereby preventing dispersion of the electrical signal.	17.881% (27/151)	0.0145652	1.84	NA	NA	2.649% (4/151)	0.0786424	1.1	NA	NA	0% (0/151)	0.0818926	1.09	NA	NA	1.325% (2/151)	0.0796093	1.1	NA	NA	1.325% (2/151)	0.00848204	2.07	ENSG00000133424;ENSG00000172071	LARGE1;EIF2AK3
1	3.21	GO:0007399	nervous system development	The process whose specific outcome is the progression of nervous tissue over time, from its formation to its mature state.	17.188% (434/2525)	0.00183082	2.74	ENSG00000002745;ENSG00000004487;ENSG00000005513;ENSG00000006459;ENSG00000006607;ENSG00000006740;ENSG00000007372;ENSG00000007944;ENSG00000008083;ENSG00000009694;ENSG00000010361;ENSG00000011143;ENSG00000011201;ENSG00000011304;ENSG00000023734;ENSG00000026025;ENSG00000033867;ENSG00000034053;ENSG00000038427;ENSG00000040531;ENSG00000042832;ENSG00000043143;ENSG00000046653;ENSG00000047597;ENSG00000049759…	WNT16;KDM1A;SOX8;KDM7A;FARP2;ARHGAP44;PAX6;MYLIP;JARID2;TENM1;FUZ;MKS1;ANOS1;PTBP1;STRAP;VIM;SLC4A7;APBA2;VCAN;CTNS;TG;JADE2;GPM6B;XK;NEDD4L;FSTL4;GALC;MCOLN3;PRDM1;RASGRF1;ATP2B4;DGKG;WNK1;LTK;SPEN;CTNNA2;KDM4A;ASPM;FGFR2;PRKCZ;ROCK1;HDAC4;MEF2A;ACSL4;NUP133;NEDD4;MAPK6;WDR1;ALDH3A2;FBXW11;XRCC1;PICALM;CELSR1;RAP1GAP;USP33;ACER3;NRDC;SLC1A3;HSP90AA1;LRP2;SMARCD3;GSK3B;RAB10;CTTN;ATG16L1;ACHE;DYN…	4.673% (118/2525)	0.0493739	1.31	NA	NA	0.317% (8/2525)	0.00676627	2.17	ENSG00000081189;ENSG00000112655;ENSG00000114450;ENSG00000128872;ENSG00000142798;ENSG00000184226;ENSG00000186716;ENSG00000198399	MEF2C;PTK7;GNB4;TMOD2;HSPG2;PCDH9;BCR;ITSN2	2.535% (64/2525)	0.00823327	2.08	ENSG00000011201;ENSG00000034053;ENSG00000047597;ENSG00000049759;ENSG00000055732;ENSG00000066279;ENSG00000078124;ENSG00000079215;ENSG00000082014;ENSG00000088986;ENSG00000091129;ENSG00000092200;ENSG00000100320;ENSG00000101412;ENSG00000104219;ENSG00000106462;ENSG00000109906;ENSG00000111249;ENSG00000112290;ENSG00000112335;ENSG00000114166;ENSG00000114999;ENSG00000116678;ENSG00000122641;ENSG00000122966…	ANOS1;APBA2;XK;NEDD4L;MCOLN3;ASPM;ACER3;SLC1A3;SMARCD3;DYNLL1;NRCAM;RPGRIP1;RBFOX2;E2F1;ZDHHC2;EZH2;ZBTB16;CUX2;WASF1;SNX3;KAT2B;TTL;LEPR;INHBA;CIT;NRN1;RAP2A;YWHAH;SERPINF1;BEX1;LDHA;ARHGAP32;TMEM14B;FGF2;ANXA3;ARK2C;RAB13;S100A8;SLC4A10;SRD5A1;CDKN2B;UGCG;FEZ1;ITGB1;SLC7A11;UHMK1;NRG1;KIT;PLXDC1;FZD5;AIM2;DPCD;SDC2;BPGM;LINGO2;EFHC2;NOG;KREMEN1;GLDN;FAT4;TCTN1;ERCC6;NAIP;SELENOP	0.871% (22/2525)	0.00713401	2.15	ENSG00000077327;ENSG00000081189;ENSG00000091129;ENSG00000103528;ENSG00000114315;ENSG00000119042;ENSG00000122641;ENSG00000125249;ENSG00000129757;ENSG00000133169;ENSG00000133424;ENSG00000134909;ENSG00000134986;ENSG00000139174;ENSG00000141622;ENSG00000145911;ENSG00000150093;ENSG00000172071;ENSG00000172232;ENSG00000184226;ENSG00000184349;ENSG00000186417	SPAG6;MEF2C;NRCAM;SYT17;HES1;SATB2;INHBA;RAP2A;CDKN1C;BEX1;LARGE1;ARHGAP32;NREP;PRICKLE1;ARK2C;N4BP3;ITGB1;EIF2AK3;AZU1;PCDH9;EFNA5;GLDN
1	4.47	GO:0007417	central nervous system development	The process whose specific outcome is the progression of the central nervous system over time, from its formation to the mature structure. The central nervous system is the core nervous system that serves an integrating and coordinating function. In vertebrates it consists of the brain and spinal cord. In those invertebrates with a central nervous system it typically consists of a brain, cerebral…	16.57% (171/1032)	0.0098499	2.01	ENSG00000004487;ENSG00000005513;ENSG00000006459;ENSG00000007372;ENSG00000008083;ENSG00000026025;ENSG00000038427;ENSG00000040531;ENSG00000046653;ENSG00000058668;ENSG00000066032;ENSG00000066135;ENSG00000066279;ENSG00000066468;ENSG00000071127;ENSG00000072210;ENSG00000072803;ENSG00000073050;ENSG00000075275;ENSG00000081479;ENSG00000082701;ENSG00000085978;ENSG00000088986;ENSG00000091129;ENSG00000095139…	KDM1A;SOX8;KDM7A;PAX6;JARID2;VIM;VCAN;CTNS;GPM6B;ATP2B4;CTNNA2;KDM4A;ASPM;FGFR2;WDR1;ALDH3A2;FBXW11;XRCC1;CELSR1;LRP2;GSK3B;ATG16L1;DYNLL1;NRCAM;ARCN1;WHRN;EFHC1;RAB18;RBFOX2;SLC8A3;CDK5RAP1;SMARCA1;RBBP7;STK3;PTPRS;CDK6;PPP1R17;EZH2;RHEB;WNT3;CDK5RAP3;YWHAE;ZBTB16;ZPR1;EIF2B1;IFNG;FOXP1;SPTBN1;RTN4;SOS1;HDAC1;ID3;FOXO3;PKD2;MAPKAP1;INHBA;CDKN2C;WWP1;ATXN1;BBS2;IL1B;PSPN;MED1;C3;TTBK2;ALDH1A2;FXR…	4.748% (49/1032)	0.00312649	2.5	ENSG00000008083;ENSG00000018625;ENSG00000038427;ENSG00000049768;ENSG00000081479;ENSG00000091129;ENSG00000099250;ENSG00000100320;ENSG00000102038;ENSG00000105810;ENSG00000106341;ENSG00000108576;ENSG00000114948;ENSG00000115904;ENSG00000123080;ENSG00000130164;ENSG00000132170;ENSG00000134333;ENSG00000134909;ENSG00000135919;ENSG00000138772;ENSG00000143546;ENSG00000144290;ENSG00000144554;ENSG00000145545…	JARID2;ATP1A2;VCAN;FOXP3;LRP2;NRCAM;NRP1;RBFOX2;SMARCA1;CDK6;PPP1R17;SLC6A4;ADAM23;SOS1;CDKN2C;LDLR;PPARG;LDHA;ARHGAP32;SERPINE2;ANXA3;S100A8;SLC4A10;FANCD2;SRD5A1;DAAM2;SLC7A11;GRIA1;LRP8;DISC1;S100A9;CCDC141;HPRT1;NDRG2;CKB;SEMA6B;CDH2;MYD88;KCNA2;GATA2;NOG;PCDH9;ROR1;MATCAP1;FAT4;PGAP1;TCTN1;PLXNA4;NEFL	0.388% (4/1032)	0.000405678	3.39	ENSG00000114450;ENSG00000142798;ENSG00000184226;ENSG00000186716	GNB4;HSPG2;PCDH9;BCR	2.713% (28/1032)	0.000471736	3.33	ENSG00000066279;ENSG00000088986;ENSG00000091129;ENSG00000100320;ENSG00000101412;ENSG00000106462;ENSG00000109906;ENSG00000122641;ENSG00000128245;ENSG00000134333;ENSG00000134909;ENSG00000137210;ENSG00000138685;ENSG00000138772;ENSG00000143546;ENSG00000144290;ENSG00000145545;ENSG00000149557;ENSG00000150093;ENSG00000151012;ENSG00000161381;ENSG00000163568;ENSG00000166171;ENSG00000172331;ENSG00000183691…	ASPM;DYNLL1;NRCAM;RBFOX2;E2F1;EZH2;ZBTB16;INHBA;YWHAH;LDHA;ARHGAP32;TMEM14B;FGF2;ANXA3;S100A8;SLC4A10;SRD5A1;FEZ1;ITGB1;SLC7A11;PLXDC1;AIM2;DPCD;BPGM;NOG;FAT4;TCTN1;SELENOP	0.678% (7/1032)	0.000370418	3.43	ENSG00000091129;ENSG00000114315;ENSG00000122641;ENSG00000133424;ENSG00000134909;ENSG00000150093;ENSG00000184226	NRCAM;HES1;INHBA;LARGE1;ARHGAP32;ITGB1;PCDH9
1	4.01	GO:0072359	circulatory system development	The process whose specific outcome is the progression of the circulatory system over time, from its formation to the mature structure. The circulatory system is the organ system that passes nutrients (such as amino acids and electrolytes), gases, hormones, blood cells, etc. to and from cells in the body to help fight diseases and help stabilize body temperature and pH to maintain homeostasis.	15.766% (178/1129)	0.0491645	1.31	NA	NA	4.96% (56/1129)	0.0407262	1.39	NA	NA	0.266% (3/1129)	0.00750544	2.12	ENSG00000081189;ENSG00000112655;ENSG00000142798	MEF2C;PTK7;HSPG2	2.923% (33/1129)	0.0477109	1.32	NA	NA	0.974% (11/1129)	0.114967	0.94	NA	NA
1	2.51	GO:0048731	system development	The process whose specific outcome is the progression of an organismal system over time, from its formation to the mature structure. A system is a regularly interacting or interdependent group of organs or tissues that work together to carry out a given biological process.	16.368% (649/3965)	0.00545039	2.26	ENSG00000002745;ENSG00000004487;ENSG00000005108;ENSG00000005513;ENSG00000006125;ENSG00000006459;ENSG00000006607;ENSG00000006740;ENSG00000007372;ENSG00000007944;ENSG00000008083;ENSG00000009307;ENSG00000009694;ENSG00000010361;ENSG00000011143;ENSG00000011201;ENSG00000011304;ENSG00000011465;ENSG00000012223;ENSG00000023734;ENSG00000026025;ENSG00000026508;ENSG00000030066;ENSG00000033867;ENSG00000034053…	WNT16;KDM1A;THSD7A;SOX8;AP2B1;KDM7A;FARP2;ARHGAP44;PAX6;MYLIP;JARID2;CSDE1;TENM1;FUZ;MKS1;ANOS1;PTBP1;DCN;LTF;STRAP;VIM;CD44;NUP160;SLC4A7;APBA2;FLT4;VCAN;CTNS;TG;JADE2;GPM6B;XK;COL9A2;NEDD4L;FSTL4;FOXN3;GALC;TAB2;MCOLN3;RC3H2;PRDM1;SEC61A1;RASGRF1;ATP2B4;DGKG;WNK1;LTK;CALCRL;SPEN;MYLK;CTNNA2;TIE1;KDM4A;ASPM;FGFR2;SP100;TP53BP1;PRKCZ;ROCK1;HDAC4;MEF2A;ACSL4;NUP133;NEDD4;MAPK6;UFD1;WDR1;EPN2;ALDH3…	4.363% (173/3965)	0.0053955	2.27	ENSG00000005108;ENSG00000008083;ENSG00000009694;ENSG00000010319;ENSG00000010327;ENSG00000011201;ENSG00000012223;ENSG00000018625;ENSG00000026508;ENSG00000038295;ENSG00000038427;ENSG00000049768;ENSG00000055208;ENSG00000055732;ENSG00000057657;ENSG00000065534;ENSG00000067066;ENSG00000068024;ENSG00000068305;ENSG00000072840;ENSG00000078098;ENSG00000078747;ENSG00000079215;ENSG00000080854;ENSG00000081479…	THSD7A;JARID2;TENM1;SEMA3G;STAB1;ANOS1;LTF;ATP1A2;CD44;TLL1;VCAN;FOXP3;TAB2;MCOLN3;PRDM1;MYLK;SP100;HDAC4;MEF2A;EVC;FAP;ITCH;SLC1A3;IGSF9B;LRP2;SMARCD3;CTTN;NRCAM;RPGRIP1;PDE6C;NRP1;SEZ6L;RBFOX2;ADNP2;SMARCA1;HSF4;SYT17;TRPS1;CDK6;ITGB8;PPP1R17;SETX;NEURL1;SLC6A4;MAP2K6;NRXN2;LTA4H;ELK3;SASH1;MAPK14;ADGRG6;PTK7;IL4;ADAM23;ACVR1;SOS1;NFE2L2;GADD45A;LGALS8;PRDX1;SGK1;TEK;CD274;SOCS2;CCR2;ACVR2A;CDK…	0.227% (9/3965)	0.160774	0.79	NA	NA	2.497% (99/3965)	0.0590482	1.23	NA	NA	0.731% (29/3965)	0.00443441	2.35	ENSG00000012223;ENSG00000077327;ENSG00000081189;ENSG00000082293;ENSG00000091129;ENSG00000103528;ENSG00000114315;ENSG00000119042;ENSG00000122641;ENSG00000125249;ENSG00000129757;ENSG00000133169;ENSG00000133424;ENSG00000134909;ENSG00000134986;ENSG00000135077;ENSG00000139174;ENSG00000141622;ENSG00000145911;ENSG00000150093;ENSG00000151320;ENSG00000164047;ENSG00000164056;ENSG00000172071;ENSG00000172232…	LTF;SPAG6;MEF2C;COL19A1;NRCAM;SYT17;HES1;SATB2;INHBA;RAP2A;CDKN1C;BEX1;LARGE1;ARHGAP32;NREP;HAVCR2;PRICKLE1;ARK2C;N4BP3;ITGB1;AKAP6;CAMP;SPRY1;EIF2AK3;AZU1;CD248;PCDH9;EFNA5;GLDN
1	6.78	GO:0035270	endocrine system development	Progression of the endocrine system over time, from its formation to a mature structure. The endocrine system is a system of hormones and ductless glands, where the glands release hormones directly into the blood, lymph or other intercellular fluid, and the hormones circulate within the body to affect distant organs. The major glands that make up the human endocrine system are the hypothalamus, p…	14.894% (21/141)	0.0038931	2.41	ENSG00000007372;ENSG00000040531;ENSG00000042832;ENSG00000076864;ENSG00000082701;ENSG00000105810;ENSG00000106615;ENSG00000106799;ENSG00000126351;ENSG00000128918;ENSG00000129757;ENSG00000135046;ENSG00000138061;ENSG00000142208;ENSG00000145545;ENSG00000150347;ENSG00000164442;ENSG00000170558;ENSG00000179348;ENSG00000183691;ENSG00000196712	PAX6;CTNS;TG;RAP1GAP;GSK3B;CDK6;RHEB;TGFBR1;THRA;ALDH1A2;CDKN1C;ANXA1;CYP1B1;AKT1;SRD5A1;ARID5B;CITED2;CDH2;GATA2;NOG;NF1	6.383% (9/141)	0.0269247	1.57	NA	NA	0% (0/141)	0.00584177	2.23	NA	NA	2.128% (3/141)	0.0159701	1.8	NA	NA	2.128% (3/141)	0.0114328	1.94	NA	NA
1	8.59	GO:0008340	determination of adult lifespan	The pathways that regulate the duration of the adult phase of the life-cycle of an animal.	13.889% (5/36)	0.0047293	2.33	ENSG00000132932;ENSG00000164430;ENSG00000187486;ENSG00000197275;ENSG00000198947	ATP8A2;CGAS;KCNJ11;RAD54B;DMD	2.778% (1/36)	0.0174434	1.76	NA	NA	0% (0/36)	0.0281922	1.55	NA	NA	2.778% (1/36)	0.0206811	1.68	NA	NA	2.778% (1/36)	0.0613364	1.21	NA	NA
1	7.71	GO:0009791	post-embryonic development	The process whose specific outcome is the progression of the organism over time, from the completion of embryonic development to the mature structure. See embryonic development.	19.54% (17/87)	0.017578	1.76	NA	NA	3.448% (3/87)	0.0016427	2.78	ENSG00000057657;ENSG00000144290;ENSG00000150347	PRDM1;SLC4A10;ARID5B	0% (0/87)	0.000649239	3.19	NA	NA	4.598% (4/87)	0.00246394	2.61	ENSG00000056586;ENSG00000144290;ENSG00000163251;ENSG00000250722	RC3H2;SLC4A10;FZD5;SELENOP	1.149% (1/87)	0.00117206	2.93	ENSG00000133424	LARGE1
1	2.29	GO:0007275	multicellular organism development	The biological process whose specific outcome is the progression of a multicellular organism over time from an initial condition (e.g. a zygote or a young adult) to a later condition (e.g. a multicellular animal or an aged adult).	16.566% (768/4636)	0.0254533	1.59	NA	NA	4.228% (196/4636)	0.0569365	1.24	NA	NA	0.216% (10/4636)	0.00201273	2.7	ENSG00000070961;ENSG00000081189;ENSG00000082293;ENSG00000112655;ENSG00000114450;ENSG00000128872;ENSG00000142798;ENSG00000184226;ENSG00000186716;ENSG00000198399	ATP2B1;MEF2C;COL19A1;PTK7;GNB4;TMOD2;HSPG2;PCDH9;BCR;ITSN2	2.416% (112/4636)	0.0302745	1.52	NA	NA	0.69% (32/4636)	0.0233338	1.63	NA	NA
1	7.69	GO:0060425	lung morphogenesis	The process in which the anatomical structures of the lung are generated and organized.	12.5% (7/56)	0.00210003	2.68	ENSG00000066468;ENSG00000075275;ENSG00000133703;ENSG00000151208;ENSG00000163513;ENSG00000168036;ENSG00000183691	FGFR2;CELSR1;KRAS;DLG5;TGFBR2;CTNNB1;NOG	1.786% (1/56)	0.0177379	1.75	NA	NA	0% (0/56)	0.0269411	1.57	NA	NA	1.786% (1/56)	0.0205021	1.69	NA	NA	1.786% (1/56)	0.0254457	1.59	NA	NA
1	8.34	GO:0060441	epithelial tube branching involved in lung morphogenesis	The process in which a highly ordered sequence of patterning events generates the branched epithelial tubes of the lung, consisting of reiterated combinations of bud outgrowth, elongation, and dichotomous subdivision of terminal units.	16.667% (5/30)	0.00964001	2.02	ENSG00000066468;ENSG00000075275;ENSG00000133703;ENSG00000151208;ENSG00000168036	FGFR2;CELSR1;KRAS;DLG5;CTNNB1	0% (0/30)	0.00200298	2.7	NA	NA	0% (0/30)	0.00324038	2.49	NA	NA	0% (0/30)	0.00236312	2.63	NA	NA	3.333% (1/30)	0.00301254	2.52	ENSG00000164056	SPRY1
1	8.57	GO:0060487	lung epithelial cell differentiation	The process in which a relatively unspecialized cell acquires specialized features of an epithelial cell that contributes to the epithelium of the lung.	20.69% (6/29)	0.00261007	2.58	ENSG00000106305;ENSG00000111144;ENSG00000126351;ENSG00000133703;ENSG00000168036;ENSG00000221823	AIMP2;LTA4H;THRA;KRAS;CTNNB1;PPP3R1	3.448% (1/29)	0.000685452	3.16	ENSG00000111144	LTA4H	0% (0/29)	0.000315612	3.5	NA	NA	3.448% (1/29)	0.000841975	3.07	ENSG00000111144	LTA4H	0% (0/29)	0.000285006	3.55	NA	NA
1	10.11	GO:0060484	lung-associated mesenchyme development	The biological process whose specific outcome is the progression of a lung-associated mesenchyme from an initial condition to its mature state. This process begins with the formation of lung-associated mesenchyme and ends with the mature structure. Lung-associated mesenchyme is the tissue made up of loosely connected mesenchymal cells in the lung.	33.333% (3/9)	0.134685	0.87	NA	NA	11.111% (1/9)	0.0532146	1.27	NA	NA	11.111% (1/9)	0.0601851	1.22	NA	NA	0% (0/9)	0.00889452	2.05	NA	NA	0% (0/9)	0.00971573	2.01	NA	NA
1	6.29	GO:0030323	respiratory tube development	The process whose specific outcome is the progression of the respiratory tube over time, from its formation to the mature structure. The respiratory tube is assumed to mean any tube in the respiratory tract.	13.636% (27/198)	0.260371	0.58	NA	NA	2.525% (5/198)	0.0064824	2.19	ENSG00000111144;ENSG00000112655;ENSG00000133048;ENSG00000151012;ENSG00000183691	LTA4H;PTK7;CHI3L1;SLC7A11;NOG	0.505% (1/198)	0.00704313	2.15	ENSG00000112655	PTK7	2.525% (5/198)	0.00661868	2.18	ENSG00000056586;ENSG00000111144;ENSG00000138685;ENSG00000151012;ENSG00000183691	RC3H2;LTA4H;FGF2;SLC7A11;NOG	1.01% (2/198)	0.00695336	2.16	ENSG00000114315;ENSG00000164056	HES1;SPRY1
1	6.33	GO:0030324	lung development	The process whose specific outcome is the progression of the lung over time, from its formation to the mature structure. In all air-breathing vertebrates the lungs are developed from the ventral wall of the oesophagus as a pouch which divides into two sacs. In amphibians and many reptiles the lungs retain very nearly this primitive sac-like character, but in the higher forms the connection with t…	12.887% (25/194)	4.63e-05	4.33	ENSG00000037280;ENSG00000056586;ENSG00000066468;ENSG00000075275;ENSG00000102174;ENSG00000106305;ENSG00000109670;ENSG00000110958;ENSG00000111144;ENSG00000112655;ENSG00000115221;ENSG00000116016;ENSG00000116285;ENSG00000126351;ENSG00000128918;ENSG00000133048;ENSG00000133703;ENSG00000151012;ENSG00000151208;ENSG00000163513;ENSG00000168036;ENSG00000183691;ENSG00000197859;ENSG00000204217;ENSG00000221823	FLT4;RC3H2;FGFR2;CELSR1;PHEX;AIMP2;FBXW7;PTGES3;LTA4H;PTK7;ITGB6;EPAS1;ERRFI1;THRA;ALDH1A2;CHI3L1;KRAS;SLC7A11;DLG5;TGFBR2;CTNNB1;NOG;ADAMTSL2;BMPR2;PPP3R1	2.577% (5/194)	1.18e-05	4.93	ENSG00000111144;ENSG00000112655;ENSG00000133048;ENSG00000151012;ENSG00000183691	LTA4H;PTK7;CHI3L1;SLC7A11;NOG	0.515% (1/194)	2.25e-05	4.65	ENSG00000112655	PTK7	2.577% (5/194)	4.37e-05	4.36	ENSG00000056586;ENSG00000111144;ENSG00000138685;ENSG00000151012;ENSG00000183691	RC3H2;LTA4H;FGF2;SLC7A11;NOG	1.031% (2/194)	9.55e-05	4.02	ENSG00000114315;ENSG00000164056	HES1;SPRY1
1	8.13	GO:0048286	lung alveolus development	The process whose specific outcome is the progression of the alveolus over time, from its formation to the mature structure. The alveolus is a sac for holding air in the lungs; formed by the terminal dilation of air passageways.	14.815% (8/54)	0.021649	1.66	NA	NA	1.852% (1/54)	0.00239716	2.62	ENSG00000151012	SLC7A11	0% (0/54)	0.00492836	2.31	NA	NA	3.704% (2/54)	0.00748812	2.13	ENSG00000056586;ENSG00000151012	RC3H2;SLC7A11	0% (0/54)	0.00444833	2.35	NA	NA
1	7.09	GO:0001657	ureteric bud development	The process whose specific outcome is the progression of the ureteric bud over time, from its formation to the mature structure.	8.911% (9/101)	0.000290973	3.54	ENSG00000005513;ENSG00000066468;ENSG00000081181;ENSG00000118762;ENSG00000153936;ENSG00000168036;ENSG00000179222;ENSG00000183691;ENSG00000196159	SOX8;FGFR2;ARG2;PKD2;HS2ST1;CTNNB1;MAGED1;NOG;FAT4	2.97% (3/101)	0.00268264	2.57	ENSG00000162849;ENSG00000183691;ENSG00000196159	KIF26B;NOG;FAT4	0% (0/101)	0.00689863	2.16	NA	NA	2.97% (3/101)	0.00434625	2.36	ENSG00000138685;ENSG00000183691;ENSG00000196159	FGF2;NOG;FAT4	1.98% (2/101)	0.0115952	1.94	NA	NA
1	6.94	GO:0072164	mesonephric tubule development	The progression of a mesonephric tubule over time, from its initial formation to the mature structure. A mesonephric tubule is an epithelial tube that is part of the mesonephros.	8.824% (9/102)	0.140822	0.85	NA	NA	2.941% (3/102)	0.141703	0.85	NA	NA	0% (0/102)	0.141892	0.85	NA	NA	2.941% (3/102)	0.141671	0.85	NA	NA	1.961% (2/102)	0.00811881	2.09	ENSG00000114315;ENSG00000164056	HES1;SPRY1
1	6.76	GO:0060993	kidney morphogenesis	Morphogenesis of a kidney. A kidney is an organ that filters the blood and excretes the end products of body metabolism in the form of urine.	10% (10/100)	0.00300193	2.52	ENSG00000005513;ENSG00000040531;ENSG00000118762;ENSG00000146021;ENSG00000153936;ENSG00000168036;ENSG00000179222;ENSG00000183691;ENSG00000187210;ENSG00000196159	SOX8;CTNS;PKD2;KLHL3;HS2ST1;CTNNB1;MAGED1;NOG;GCNT1;FAT4	3% (3/100)	0.0186483	1.73	NA	NA	0% (0/100)	0.0422323	1.37	NA	NA	3% (3/100)	0.0382062	1.42	NA	NA	1% (1/100)	0.0618916	1.21	NA	NA
1	5.44	GO:0001822	kidney development	The process whose specific outcome is the progression of the kidney over time, from its formation to the mature structure. The kidney is an organ that filters the blood and/or excretes the end products of body metabolism in the form of urine.	16.562% (53/320)	0.126424	0.9	NA	NA	4.062% (13/320)	0.00394104	2.4	ENSG00000057657;ENSG00000081479;ENSG00000099250;ENSG00000112655;ENSG00000120156;ENSG00000129757;ENSG00000132906;ENSG00000150347;ENSG00000154188;ENSG00000162849;ENSG00000164488;ENSG00000183691;ENSG00000196159	PRDM1;LRP2;NRP1;PTK7;TEK;CDKN1C;CASP9;ARID5B;ANGPT1;KIF26B;DACT2;NOG;FAT4	0.625% (2/320)	0.00140589	2.85	ENSG00000081189;ENSG00000112655	MEF2C;PTK7	2.812% (9/320)	0.00128402	2.89	ENSG00000006125;ENSG00000106462;ENSG00000109906;ENSG00000132386;ENSG00000138685;ENSG00000154734;ENSG00000183691;ENSG00000196159;ENSG00000198087	AP2B1;EZH2;ZBTB16;SERPINF1;FGF2;ADAMTS1;NOG;FAT4;CD2AP	1.25% (4/320)	0.00117967	2.93	ENSG00000081189;ENSG00000114315;ENSG00000129757;ENSG00000164056	MEF2C;HES1;CDKN1C;SPRY1
1	9.26	GO:0070365	hepatocyte differentiation	The process in which a relatively unspecialized cell acquires the specialized features of a hepatocyte. A hepatocyte is specialized epithelial cell that is organized into interconnected plates called lobules, and is the main structural component of the liver.	20% (3/15)	0.0736909	1.13	NA	NA	6.667% (1/15)	0.0293555	1.53	NA	NA	0% (0/15)	0.0105007	1.98	NA	NA	0% (0/15)	0.00752651	2.12	NA	NA	0% (0/15)	0.00982036	2.01	NA	NA
1	7.06	GO:0001889	liver development	The process whose specific outcome is the progression of the liver over time, from its formation to the mature structure. The liver is an exocrine gland which secretes bile and functions in metabolism of protein and carbohydrate and fat, synthesizes substances involved in the clotting of the blood, synthesizes vitamin A, detoxifies poisonous substances, stores glycogen, and breaks down worn-out e…	15.972% (23/144)	0.00115245	2.94	ENSG00000008083;ENSG00000075239;ENSG00000099956;ENSG00000103257;ENSG00000106462;ENSG00000108465;ENSG00000109670;ENSG00000115310;ENSG00000116285;ENSG00000118503;ENSG00000118762;ENSG00000125686;ENSG00000128918;ENSG00000129173;ENSG00000130175;ENSG00000135046;ENSG00000136634;ENSG00000145545;ENSG00000147883;ENSG00000150347;ENSG00000163235;ENSG00000164442;ENSG00000196712	JARID2;ACAT1;SMARCB1;SLC7A5;EZH2;CDK5RAP3;FBXW7;RTN4;ERRFI1;TNFAIP3;PKD2;MED1;ALDH1A2;E2F8;PRKCSH;ANXA1;IL10;SRD5A1;CDKN2B;ARID5B;TGFA;CITED2;NF1	3.472% (5/144)	0.000283077	3.55	ENSG00000008083;ENSG00000135046;ENSG00000145545;ENSG00000147883;ENSG00000150347	JARID2;ANXA1;SRD5A1;CDKN2B;ARID5B	0% (0/144)	2.93e-05	4.53	NA	NA	2.778% (4/144)	7.09e-06	5.15	ENSG00000106462;ENSG00000136634;ENSG00000145545;ENSG00000147883	EZH2;IL10;SRD5A1;CDKN2B	0.694% (1/144)	0.000383482	3.42	ENSG00000114315	HES1
1	8.84	GO:0097421	liver regeneration	The regrowth of lost or destroyed liver.	9.677% (3/31)	0.00977643	2.01	ENSG00000103257;ENSG00000106462;ENSG00000136634	SLC7A5;EZH2;IL10	0% (0/31)	0.00247099	2.61	NA	NA	0% (0/31)	0.00413771	2.38	NA	NA	6.452% (2/31)	0.0267109	1.57	NA	NA	0% (0/31)	0.00384824	2.41	NA	NA
1	9.26	GO:0043584	nose development	The process whose specific outcome is the progression of the nose over time, from its formation to the mature structure. The nose is the specialized structure of the face that serves as the organ of the sense of smell and as part of the respiratory system. Includes the nasi externus (external nose) and cavitas nasi (nasal cavity).	0% (0/16)	0.00820633	2.09	NA	NA	0% (0/16)	0.0613294	1.21	NA	NA	0% (0/16)	0.0898262	1.05	NA	NA	0% (0/16)	0.0686718	1.16	NA	NA	0% (0/16)	0.0850734	1.07	NA	NA
1	6.36	GO:0048839	inner ear development	The process whose specific outcome is the progression of the inner ear over time, from its formation to the mature structure.	13.659% (28/205)	0.074042	1.13	NA	NA	3.415% (7/205)	0.00669036	2.17	ENSG00000055732;ENSG00000112655;ENSG00000168234;ENSG00000179348;ENSG00000185483;ENSG00000196159;ENSG00000255833	MCOLN3;PTK7;TTC39C;GATA2;ROR1;FAT4;TIFAB	0.976% (2/205)	0.00919551	2.04	ENSG00000112655;ENSG00000186716	PTK7;BCR	1.463% (3/205)	0.00906845	2.04	ENSG00000055732;ENSG00000138685;ENSG00000196159	MCOLN3;FGF2;FAT4	0.488% (1/205)	0.00825688	2.08	ENSG00000114315	HES1
1	8.28	GO:0090102	cochlea development	The progression of the cochlea over time from its formation to the mature structure. The cochlea is the snail-shaped portion of the inner ear that is responsible for the detection of sound.	15.686% (8/51)	0.0164916	1.78	NA	NA	5.882% (3/51)	0.00709048	2.15	ENSG00000112655;ENSG00000179348;ENSG00000255833	PTK7;GATA2;TIFAB	1.961% (1/51)	0.00985399	2.01	ENSG00000112655	PTK7	0% (0/51)	0.00314631	2.5	NA	NA	1.961% (1/51)	0.00945401	2.02	ENSG00000114315	HES1
1	9.17	GO:0048339	paraxial mesoderm development	The process whose specific outcome is the progression of the paraxial mesoderm over time, from its formation to the mature structure. The paraxial mesoderm is the mesoderm located bilaterally adjacent to the notochord and neural tube.	5% (1/20)	0.00603508	2.22	ENSG00000069248	NUP133	0% (0/20)	0.0214932	1.67	NA	NA	0% (0/20)	0.0296509	1.53	NA	NA	0% (0/20)	0.0240625	1.62	NA	NA	0% (0/20)	0.0283378	1.55	NA	NA
1	6.5	GO:0031214	biomineral tissue development	Formation of hard tissues that consist mainly of inorganic compounds, and also contain a small amounts of organic matrices that are believed to play important roles in their formation.	14.444% (26/180)	0.00809507	2.09	ENSG00000012223;ENSG00000046653;ENSG00000066468;ENSG00000067900;ENSG00000089041;ENSG00000100109;ENSG00000102174;ENSG00000108950;ENSG00000115170;ENSG00000115221;ENSG00000121989;ENSG00000122862;ENSG00000134318;ENSG00000138756;ENSG00000138829;ENSG00000155090;ENSG00000161944;ENSG00000162551;ENSG00000164023;ENSG00000165973;ENSG00000169071;ENSG00000175894;ENSG00000183023;ENSG00000183337;ENSG00000184677…	LTF;GPM6B;FGFR2;ROCK1;P2RX7;TFIP11;PHEX;FAM20A;ACVR1;ITGB6;ACVR2A;SRGN;ROCK2;BMP2K;FBN2;KLF10;ASGR2;ALPL;SGMS2;NELL1;ROR2;TSPEAR;SLC8A1;BCOR;ZBTB40;BMPR2	3.889% (7/180)	0.0147811	1.83	NA	NA	1.111% (2/180)	0.0127609	1.89	NA	NA	1.667% (3/180)	0.00544862	2.26	ENSG00000012223;ENSG00000089041;ENSG00000108950	LTF;P2RX7;FAM20A	2.222% (4/180)	0.0156475	1.81	NA	NA
1	6.26	GO:0051216	cartilage development	The process whose specific outcome is the progression of a cartilage element over time, from its formation to the mature structure. Cartilage elements are skeletal elements that consist of connective tissue dominated by extracellular matrix containing collagen type II and large amounts of proteoglycan, particularly chondroitin sulfate.	13.084% (28/214)	0.000739013	3.13	ENSG00000026508;ENSG00000072840;ENSG00000104331;ENSG00000104447;ENSG00000105855;ENSG00000106799;ENSG00000109906;ENSG00000112062;ENSG00000116285;ENSG00000119042;ENSG00000120451;ENSG00000125124;ENSG00000126351;ENSG00000133048;ENSG00000136999;ENSG00000139687;ENSG00000143797;ENSG00000144320;ENSG00000147408;ENSG00000149257;ENSG00000162599;ENSG00000163346;ENSG00000163513;ENSG00000168036;ENSG00000176624…	CD44;EVC;BPNT2;TRPS1;ITGB8;TGFBR1;ZBTB16;MAPK14;ERRFI1;SATB2;SNX19;BBS2;THRA;CHI3L1;CCN3;RB1;MBOAT2;LNPK;CSGALNACT1;SERPINH1;NFIA;PBXIP1;TGFBR2;CTNNB1;MEX3C;MAF;NOG;BMPR2	3.738% (8/214)	0.00103219	2.99	ENSG00000026508;ENSG00000072840;ENSG00000104447;ENSG00000105855;ENSG00000112062;ENSG00000133048;ENSG00000147408;ENSG00000183691	CD44;EVC;TRPS1;ITGB8;MAPK14;CHI3L1;CSGALNACT1;NOG	0.467% (1/214)	0.000493858	3.31	ENSG00000081189	MEF2C	2.804% (6/214)	0.000284336	3.55	ENSG00000072840;ENSG00000104447;ENSG00000109906;ENSG00000112062;ENSG00000138685;ENSG00000183691	EVC;TRPS1;ZBTB16;MAPK14;FGF2;NOG	1.402% (3/214)	0.000523518	3.28	ENSG00000081189;ENSG00000119042;ENSG00000172071	MEF2C;SATB2;EIF2AK3
1	8.02	GO:0060612	adipose tissue development	The process whose specific outcome is the progression of adipose tissue over time, from its formation to the mature structure. Adipose tissue is specialized tissue that is used to store fat.	18.966% (11/58)	0.0285586	1.54	NA	NA	3.448% (2/58)	0.00537513	2.27	ENSG00000132170;ENSG00000150347	PPARG;ARID5B	0% (0/58)	0.00334343	2.48	NA	NA	0% (0/58)	0.00180188	2.74	NA	NA	0% (0/58)	0.00294321	2.53	NA	NA
1	8.59	GO:0030878	thyroid gland development	The process whose specific outcome is the progression of the thyroid gland over time, from its formation to the mature structure. The thyroid gland is an endoderm-derived gland that produces thyroid hormone.	12.5% (4/32)	0.016343	1.79	NA	NA	0% (0/32)	0.00130592	2.88	NA	NA	0% (0/32)	0.0021539	2.67	NA	NA	0% (0/32)	0.00155456	2.81	NA	NA	0% (0/32)	0.00199686	2.7	NA	NA
1	10.23	GO:0032808	lacrimal gland development	The process whose specific outcome is the progression of the lacrimal gland over time, from its formation to the mature structure. The lacrimal gland produces secretions that lubricate and protect the cornea of the eye.	28.571% (2/7)	0.167031	0.78	NA	NA	0% (0/7)	0.00633404	2.2	NA	NA	0% (0/7)	0.00673904	2.17	NA	NA	0% (0/7)	0.00639396	2.19	NA	NA	0% (0/7)	0.00665123	2.18	NA	NA
1	5.51	GO:0048732	gland development	The process whose specific outcome is the progression of a gland over time, from its formation to the mature structure. A gland is an organ specialised for secretion.	13.938% (63/452)	0.000201431	3.7	ENSG00000007372;ENSG00000008083;ENSG00000040531;ENSG00000042832;ENSG00000066468;ENSG00000075239;ENSG00000076864;ENSG00000096968;ENSG00000099956;ENSG00000103257;ENSG00000106462;ENSG00000106799;ENSG00000107954;ENSG00000108379;ENSG00000108465;ENSG00000109670;ENSG00000115310;ENSG00000116285;ENSG00000117595;ENSG00000118503;ENSG00000118762;ENSG00000120659;ENSG00000120833;ENSG00000123191;ENSG00000125686…	PAX6;JARID2;CTNS;TG;FGFR2;ACAT1;RAP1GAP;JAK2;SMARCB1;SLC7A5;EZH2;TGFBR1;NEURL1;WNT3;CDK5RAP3;FBXW7;RTN4;ERRFI1;IRF6;TNFAIP3;PKD2;TNFSF11;SOCS2;ATP7B;MED1;THRA;ALDH1A2;E2F8;CDKN1C;PRKCSH;LATS1;SERPINF1;ANXA1;SERPINE2;EDAR;IL10;CYP1B1;AKT1;EPHA2;GDF7;SRD5A1;CDKN2B;ARID5B;NRG1;EDA;TGFA;TGFBR2;CITED2;STAT6;NKX3-1;PRDX2;CTNNB1;STAT5B;GATA2;ALOX15B;CACNB4;CSF1R;NOG;IQGAP3;NF1;DDR1;LBH;ORAI1	3.761% (17/452)	0.00199146	2.7	ENSG00000008083;ENSG00000099250;ENSG00000107954;ENSG00000111335;ENSG00000120833;ENSG00000129757;ENSG00000135046;ENSG00000135919;ENSG00000138061;ENSG00000145545;ENSG00000147883;ENSG00000150347;ENSG00000157168;ENSG00000158813;ENSG00000179348;ENSG00000182389;ENSG00000183691	JARID2;NRP1;NEURL1;OAS2;SOCS2;CDKN1C;ANXA1;SERPINE2;CYP1B1;SRD5A1;CDKN2B;ARID5B;NRG1;EDA;GATA2;CACNB4;NOG	0% (0/452)	0.000126773	3.9	NA	NA	2.212% (10/452)	0.000319076	3.5	ENSG00000106462;ENSG00000132386;ENSG00000135960;ENSG00000136634;ENSG00000138685;ENSG00000145545;ENSG00000147883;ENSG00000157168;ENSG00000182389;ENSG00000183691	EZH2;SERPINF1;EDAR;IL10;FGF2;SRD5A1;CDKN2B;NRG1;CACNB4;NOG	0.442% (2/452)	0.000135462	3.87	ENSG00000114315;ENSG00000129757	HES1;CDKN1C
1	2.93	GO:0048513	animal organ development	Development of a tissue or tissues that work together to perform a specific function or functions. Development pertains to the process whose specific outcome is the progression of a structure over time, from its formation to the mature structure. Organs are commonly observed as visibly distinct structures, but may also exist as loosely associated clusters of cells that work together to perform a …	15.781% (478/3029)	0.0198541	1.7	NA	NA	3.929% (119/3029)	1.87e-05	4.73	ENSG00000008083;ENSG00000010319;ENSG00000012223;ENSG00000018625;ENSG00000026508;ENSG00000055208;ENSG00000055732;ENSG00000057657;ENSG00000065534;ENSG00000068024;ENSG00000068305;ENSG00000072840;ENSG00000081479;ENSG00000082014;ENSG00000091129;ENSG00000092200;ENSG00000095464;ENSG00000099250;ENSG00000100320;ENSG00000102038;ENSG00000102878;ENSG00000104447;ENSG00000105810;ENSG00000105855;ENSG00000107954…	JARID2;SEMA3G;LTF;ATP1A2;CD44;TAB2;MCOLN3;PRDM1;MYLK;HDAC4;MEF2A;EVC;LRP2;SMARCD3;NRCAM;RPGRIP1;PDE6C;NRP1;RBFOX2;SMARCA1;HSF4;TRPS1;CDK6;ITGB8;NEURL1;SLC6A4;HLF;FAM20A;MAP2K6;LTA4H;OAS2;STX2;MAPK14;ADGRG6;PTK7;ACVR1;SOS1;TEK;SOCS2;ACVR2A;TNFAIP6;EDN3;PALLD;CDKN1C;PPARG;CASP9;CHI3L1;GRHL1;LDHA;APLNR;ARHGAP32;ANXA1;SERPINE2;FLNB;CYP1B1;ANXA3;FBN2;EIF4A3;SLC4A10;FANCD2;ANK2;SRD5A1;CSGALNACT1;CDKN2B…	0.264% (8/3029)	0.00189309	2.72	ENSG00000070961;ENSG00000081189;ENSG00000082293;ENSG00000112655;ENSG00000114450;ENSG00000142798;ENSG00000184226;ENSG00000186716	ATP2B1;MEF2C;COL19A1;PTK7;GNB4;HSPG2;PCDH9;BCR	2.245% (68/3029)	0.00125101	2.9	ENSG00000006125;ENSG00000009307;ENSG00000012223;ENSG00000047597;ENSG00000055208;ENSG00000055732;ENSG00000056586;ENSG00000066279;ENSG00000072840;ENSG00000082014;ENSG00000088986;ENSG00000089041;ENSG00000091129;ENSG00000092200;ENSG00000100320;ENSG00000101412;ENSG00000104447;ENSG00000106462;ENSG00000108950;ENSG00000108984;ENSG00000109906;ENSG00000110723;ENSG00000111144;ENSG00000112062;ENSG00000114166…	AP2B1;CSDE1;LTF;XK;TAB2;MCOLN3;RC3H2;ASPM;EVC;SMARCD3;DYNLL1;P2RX7;NRCAM;RPGRIP1;RBFOX2;E2F1;TRPS1;EZH2;FAM20A;MAP2K6;ZBTB16;EXPH5;LTA4H;MAPK14;KAT2B;LEPR;INHBA;YWHAH;SERPINF1;LDHA;ARHGAP32;EDAR;IL10;TMEM14B;FGF2;ANXA3;TPM1;RAB13;SLC4A10;SRD5A1;CDKN2B;UGCG;FEZ1;ITGB1;SLC7A11;AKAP6;ADAMTS1;NRG1;KIT;DHRS3;FZD5;AIM2;SAP30;FOXQ1;DPCD;ADAM9;KRT72;CACNB4;NOG;HEXIM1;TLR5;FAT4;AJAP1;TLE1;COL13A1;CD2AP;TC…	0.594% (18/3029)	0.000285544	3.54	ENSG00000012223;ENSG00000081189;ENSG00000082293;ENSG00000091129;ENSG00000114315;ENSG00000119042;ENSG00000122641;ENSG00000129757;ENSG00000133424;ENSG00000134909;ENSG00000139174;ENSG00000150093;ENSG00000151320;ENSG00000164056;ENSG00000172071;ENSG00000174807;ENSG00000184226;ENSG00000196781	LTF;MEF2C;COL19A1;NRCAM;HES1;SATB2;INHBA;CDKN1C;LARGE1;ARHGAP32;PRICKLE1;ITGB1;AKAP6;SPRY1;EIF2AK3;CD248;PCDH9;TLE1
1	7.3	GO:0031016	pancreas development	The process whose specific outcome is the progression of the pancreas over time, from its formation to the mature structure. The pancreas is an endoderm derived structure that produces precursors of digestive enzymes and blood glucose regulating hormones.	12.821% (10/78)	0.00441085	2.36	ENSG00000007372;ENSG00000082701;ENSG00000105810;ENSG00000106615;ENSG00000128918;ENSG00000135046;ENSG00000142208;ENSG00000168036;ENSG00000170558;ENSG00000198843	PAX6;GSK3B;CDK6;RHEB;ALDH1A2;ANXA1;AKT1;CTNNB1;CDH2;SELENOT	3.846% (3/78)	0.0147536	1.83	NA	NA	0% (0/78)	0.0293719	1.53	NA	NA	0% (0/78)	0.0179629	1.75	NA	NA	2.564% (2/78)	0.0267075	1.57	NA	NA
1	7.73	GO:0031018	endocrine pancreas development	The process whose specific outcome is the progression of the endocrine pancreas over time, from its formation to the mature structure. The endocrine pancreas is made up of islet cells that produce insulin, glucagon and somatostatin.	15.217% (7/46)	0.00899534	2.05	ENSG00000007372;ENSG00000082701;ENSG00000105810;ENSG00000106615;ENSG00000135046;ENSG00000142208;ENSG00000170558	PAX6;GSK3B;CDK6;RHEB;ANXA1;AKT1;CDH2	6.522% (3/46)	0.00674663	2.17	ENSG00000105810;ENSG00000135046;ENSG00000170558	CDK6;ANXA1;CDH2	0% (0/46)	0.00216313	2.66	NA	NA	0% (0/46)	0.00115826	2.94	NA	NA	4.348% (2/46)	0.00521778	2.28	ENSG00000114315;ENSG00000172071	HES1;EIF2AK3
1	5.92	GO:0007517	muscle organ development	The process whose specific outcome is the progression of the muscle over time, from its formation to the mature structure. The muscle is an organ consisting of a tissue made up of various elongated cells that are specialized to contract and thus to produce movement and mechanical work.	13.928% (50/359)	0.00145456	2.84	ENSG00000005513;ENSG00000009709;ENSG00000047597;ENSG00000065534;ENSG00000066468;ENSG00000068024;ENSG00000068305;ENSG00000072840;ENSG00000081479;ENSG00000092841;ENSG00000102119;ENSG00000106799;ENSG00000107758;ENSG00000107954;ENSG00000108443;ENSG00000108924;ENSG00000112062;ENSG00000113070;ENSG00000117318;ENSG00000123358;ENSG00000125686;ENSG00000133703;ENSG00000135535;ENSG00000136068;ENSG00000136603…	SOX8;PAX7;XK;MYLK;FGFR2;HDAC4;MEF2A;EVC;LRP2;MYL6;EMD;TGFBR1;PPP3CB;NEURL1;RPS6KB1;HLF;MAPK14;HBEGF;ID3;NR4A1;MED1;KRAS;CD164;FLNB;SKIL;RB1;VPS54;GTF3C5;TAGLN;ITGB1;ARID5B;DISP1;EPHB1;TTN;ZNF689;NRG1;SFMBT1;SAP30;CITED2;COPS2;CTNNB1;FOXN2;USP19;KY;ZBTB42;NOG;RYR1;NF1;DMD;TIFAB	4.735% (17/359)	0.0572995	1.24	NA	NA	0.557% (2/359)	0.00908531	2.04	ENSG00000081189;ENSG00000082293	MEF2C;COL19A1	2.228% (8/359)	0.0131232	1.88	NA	NA	1.114% (4/359)	0.0206334	1.69	NA	NA
1	8.06	GO:0031100	animal organ regeneration	The regrowth of a lost or destroyed animal organ.	16.176% (11/68)	0.0889809	1.05	NA	NA	4.412% (3/68)	0.0349214	1.46	NA	NA	1.471% (1/68)	0.00991546	2	ENSG00000142798	HSPG2	4.412% (3/68)	0.00181332	2.74	ENSG00000106462;ENSG00000136634;ENSG00000138772	EZH2;IL10;ANXA3	0% (0/68)	0.00310788	2.51	NA	NA
2	8.03	GO:0055010	ventricular cardiac muscle tissue morphogenesis	The process in which the anatomical structures of cardiac ventricle muscle is generated and organized.	12.766% (6/47)	0.00498401	2.3	ENSG00000066468;ENSG00000081479;ENSG00000106799;ENSG00000125686;ENSG00000157168;ENSG00000183691	FGFR2;LRP2;TGFBR1;MED1;NRG1;NOG	6.383% (3/47)	0.00880406	2.06	ENSG00000081479;ENSG00000157168;ENSG00000183691	LRP2;NRG1;NOG	0% (0/47)	0.00322354	2.49	NA	NA	6.383% (3/47)	0.00380707	2.42	ENSG00000140416;ENSG00000157168;ENSG00000183691	TPM1;NRG1;NOG	0% (0/47)	0.00287325	2.54	NA	NA
2	7.4	GO:0003208	cardiac ventricle morphogenesis	The process in which the cardiac ventricle is generated and organized. A cardiac ventricle receives blood from a cardiac atrium and pumps it out of the heart.	12.857% (9/70)	0.00860453	2.07	ENSG00000066468;ENSG00000081479;ENSG00000082014;ENSG00000101384;ENSG00000106799;ENSG00000125686;ENSG00000157168;ENSG00000163513;ENSG00000183691	FGFR2;LRP2;SMARCD3;JAG1;TGFBR1;MED1;NRG1;TGFBR2;NOG	5.714% (4/70)	0.00819315	2.09	ENSG00000081479;ENSG00000082014;ENSG00000157168;ENSG00000183691	LRP2;SMARCD3;NRG1;NOG	1.429% (1/70)	0.0145245	1.84	NA	NA	5.714% (4/70)	0.00976247	2.01	ENSG00000082014;ENSG00000140416;ENSG00000157168;ENSG00000183691	SMARCD3;TPM1;NRG1;NOG	1.429% (1/70)	0.0134045	1.87	NA	NA
2	7.21	GO:0060411	cardiac septum morphogenesis	The process in which the anatomical structure of a cardiac septum is generated and organized. A cardiac septum is a partition that separates parts of the heart.	18.571% (13/70)	0.00734379	2.13	ENSG00000011143;ENSG00000066468;ENSG00000081479;ENSG00000101384;ENSG00000106799;ENSG00000115170;ENSG00000162496;ENSG00000162775;ENSG00000163513;ENSG00000164442;ENSG00000183691;ENSG00000184347;ENSG00000204217	MKS1;FGFR2;LRP2;JAG1;TGFBR1;ACVR1;DHRS3;RBM15;TGFBR2;CITED2;NOG;SLIT3;BMPR2	8.571% (6/70)	0.025939	1.59	NA	NA	0% (0/70)	0.0016514	2.78	NA	NA	2.857% (2/70)	0.00173295	2.76	ENSG00000162496;ENSG00000183691	DHRS3;NOG	1.429% (1/70)	0.00323021	2.49	ENSG00000114315	HES1
2	6.45	GO:0003206	cardiac chamber morphogenesis	The process in which a cardiac chamber is generated and organized. A cardiac chamber is an enclosed cavity within the heart.	16.8% (21/125)	0.901224	0.05	NA	NA	8.8% (11/125)	0.231034	0.64	NA	NA	0.8% (1/125)	0.00950252	2.02	ENSG00000081189	MEF2C	4.8% (6/125)	0.0661594	1.18	NA	NA	1.6% (2/125)	0.00910311	2.04	ENSG00000081189;ENSG00000114315	MEF2C;HES1
2	7.45	GO:0072132	mesenchyme morphogenesis	The process in which the anatomical structures of a mesenchymal tissue are generated and organized. A mesenchymal tissue is made up of loosely packed stellate cells.	6.78% (4/59)	0.00099451	3	ENSG00000106799;ENSG00000115170;ENSG00000163513;ENSG00000183691	TGFBR1;ACVR1;TGFBR2;NOG	5.085% (3/59)	0.0112299	1.95	NA	NA	0% (0/59)	0.0187446	1.73	NA	NA	1.695% (1/59)	0.00310453	2.51	ENSG00000183691	NOG	0% (0/59)	0.0174991	1.76	NA	NA
2	7.73	GO:0003203	endocardial cushion morphogenesis	The process in which the anatomical structure of the endocardial cushion is generated and organized. The endocardial cushion is a specialized region of mesenchymal cells that will give rise to the heart septa and valves.	9.756% (4/41)	0.000830725	3.08	ENSG00000106799;ENSG00000115170;ENSG00000163513;ENSG00000183691	TGFBR1;ACVR1;TGFBR2;NOG	7.317% (3/41)	0.330625	0.48	NA	NA	0% (0/41)	0.00454245	2.34	NA	NA	2.439% (1/41)	0.142885	0.85	NA	NA	0% (0/41)	0.00400641	2.4	NA	NA
2	8.3	GO:0003272	endocardial cushion formation	The developmental process pertaining to the initial formation of an endocardial cushion. The endocardial cushion is a specialized region of mesenchymal cells that will give rise to the heart septa and valves.	14.286% (4/28)	0.0101965	1.99	NA	NA	10.714% (3/28)	0.737566	0.13	NA	NA	0% (0/28)	0.0114413	1.94	NA	NA	3.571% (1/28)	0.00717323	2.14	ENSG00000183691	NOG	0% (0/28)	0.0104108	1.98	NA	NA
2	6.59	GO:0001837	epithelial to mesenchymal transition	A transition where an epithelial cell loses apical/basolateral polarity, severs intercellular adhesive junctions, degrades basement membrane components and becomes a migratory mesenchymal cell.	15.06% (25/166)	0.00245977	2.61	ENSG00000002745;ENSG00000010361;ENSG00000066468;ENSG00000067900;ENSG00000073712;ENSG00000082701;ENSG00000101384;ENSG00000102760;ENSG00000106462;ENSG00000106799;ENSG00000115170;ENSG00000115310;ENSG00000125538;ENSG00000125630;ENSG00000134318;ENSG00000148204;ENSG00000151208;ENSG00000163513;ENSG00000166197;ENSG00000168036;ENSG00000169621;ENSG00000183691;ENSG00000197451;ENSG00000221823;ENSG00000249915	WNT16;FUZ;FGFR2;ROCK1;FERMT2;GSK3B;JAG1;RGCC;EZH2;TGFBR1;ACVR1;RTN4;IL1B;POLR1B;ROCK2;CRB2;DLG5;TGFBR2;NOLC1;CTNNB1;APLF;NOG;HNRNPAB;PPP3R1;PDCD6	1.205% (2/166)	0.000961123	3.02	ENSG00000115170;ENSG00000183691	ACVR1;NOG	0% (0/166)	0.00812948	2.09	NA	NA	1.205% (2/166)	0.0040726	2.39	ENSG00000106462;ENSG00000183691	EZH2;NOG	0.602% (1/166)	0.00152789	2.82	ENSG00000164056	SPRY1
2	8.94	GO:0003198	epithelial to mesenchymal transition involved in endocardial cushion formation	A transition where a cardiac epithelial cell loses apical/basolateral polarity, severs intercellular adhesive junctions, degrades basement membrane components and becomes a migratory mesenchymal cell that will contribute to the formation of the endocardial cushion.	13.333% (2/15)	0.0270634	1.57	NA	NA	0% (0/15)	0.00988527	2.01	NA	NA	0% (0/15)	0.0156709	1.8	NA	NA	0% (0/15)	0.0113545	1.94	NA	NA	0% (0/15)	0.0146812	1.83	NA	NA
2	8.13	GO:0060317	cardiac epithelial to mesenchymal transition	A transition where a cardiac epithelial cell loses apical/basolateral polarity, severs intercellular adhesive junctions, degrades basement membrane components and becomes a migratory mesenchymal cell.	21.212% (7/33)	0.0523252	1.28	NA	NA	6.061% (2/33)	0.252259	0.6	NA	NA	0% (0/33)	0.0055366	2.26	NA	NA	3.03% (1/33)	0.00315658	2.5	ENSG00000183691	NOG	3.03% (1/33)	0.014492	1.84	NA	NA
2	7.77	GO:0001947	heart looping	The tube morphogenesis process in which the primitive heart tube loops asymmetrically. This looping brings the primitive heart chambers into alignment preceding their future integration. Heart looping begins with dextral-looping and ends when the main regional divisions of the mature heart and primordium of the great arterial trunks become established preceeding septation.	9.091% (6/66)	1.71e-06	5.77	ENSG00000101752;ENSG00000118762;ENSG00000138002;ENSG00000163093;ENSG00000163513;ENSG00000164442	MIB1;PKD2;IFT172;BBS5;TGFBR2;CITED2	1.515% (1/66)	5.14e-06	5.29	ENSG00000134817	APLNR	1.515% (1/66)	2.44e-05	4.61	ENSG00000081189	MEF2C	0% (0/66)	2.41e-06	5.62	NA	NA	1.515% (1/66)	1.96e-05	4.71	ENSG00000081189	MEF2C
2	10.11	GO:0048702	embryonic neurocranium morphogenesis	The process in which the anatomical structures of the neurocranium are generated and organized during the embryonic phase. The neurocranium is the portion of the vertebrate skull surrounding the brain.	12.5% (1/8)	0.00971516	2.01	ENSG00000120254	MTHFD1L	0% (0/8)	0.00216333	2.66	NA	NA	0% (0/8)	0.00254076	2.6	NA	NA	0% (0/8)	0.00227127	2.64	NA	NA	0% (0/8)	0.00248571	2.6	NA	NA
2	7.34	GO:0048704	embryonic skeletal system morphogenesis	The process in which the anatomical structures of the skeleton are generated and organized during the embryonic phase.	10.753% (10/93)	0.00754508	2.12	ENSG00000010361;ENSG00000066468;ENSG00000105429;ENSG00000106799;ENSG00000119042;ENSG00000120254;ENSG00000141543;ENSG00000163513;ENSG00000168036;ENSG00000183691	FUZ;FGFR2;MEGF8;TGFBR1;SATB2;MTHFD1L;EIF4A3;TGFBR2;CTNNB1;NOG	2.151% (2/93)	0.0190647	1.72	NA	NA	0% (0/93)	0.0244795	1.61	NA	NA	1.075% (1/93)	0.0178632	1.75	NA	NA	1.075% (1/93)	0.0367343	1.43	NA	NA
2	6	GO:0048562	embryonic organ morphogenesis	Morphogenesis, during the embryonic phase, of a tissue or tissues that work together to perform a specific function or functions. Morphogenesis is the process in which anatomical structures are generated and organized. Organs are commonly observed as visibly distinct structures, but may also exist as loosely associated clusters of cells that work together to perform a specific function or functio…	11.184% (34/304)	0.370745	0.43	NA	NA	2.961% (9/304)	0.00237188	2.62	ENSG00000112655;ENSG00000115170;ENSG00000134817;ENSG00000138829;ENSG00000141543;ENSG00000168234;ENSG00000179348;ENSG00000183691;ENSG00000255833	PTK7;ACVR1;APLNR;FBN2;EIF4A3;TTC39C;GATA2;NOG;TIFAB	0.987% (3/304)	0.00429455	2.37	ENSG00000081189;ENSG00000112655;ENSG00000186716	MEF2C;PTK7;BCR	0.658% (2/304)	0.0151811	1.82	NA	NA	0.987% (3/304)	0.00571607	2.24	ENSG00000081189;ENSG00000114315;ENSG00000119042	MEF2C;HES1;SATB2
2	6.99	GO:0042471	ear morphogenesis	The process in which the anatomical structures of the ear are generated and organized. The ear is the sense organ in vertebrates that is specialized for the detection of sound, and the maintenance of balance. Includes the outer ear and middle ear, which collect and transmit sound waves; and the inner ear, which contains the organs of balance and (except in fish) hearing. Also includes the pinna, …	9.848% (13/132)	0.00838174	2.08	ENSG00000066468;ENSG00000075275;ENSG00000095397;ENSG00000107736;ENSG00000112655;ENSG00000132932;ENSG00000139304;ENSG00000165730;ENSG00000168234;ENSG00000179348;ENSG00000183691;ENSG00000196586;ENSG00000255833	FGFR2;CELSR1;WHRN;CDH23;PTK7;ATP8A2;PTPRQ;STOX1;TTC39C;GATA2;NOG;MYO6;TIFAB	3.788% (5/132)	0.0118893	1.92	NA	NA	1.515% (2/132)	0.0220628	1.66	NA	NA	0.758% (1/132)	0.00847766	2.07	ENSG00000183691	NOG	0% (0/132)	0.0121927	1.91	NA	NA
2	7.19	GO:0042472	inner ear morphogenesis	The process in which the anatomical structures of the inner ear are generated and organized. The inner ear is the structure in vertebrates that contains the organs of balance and hearing. It consists of soft hollow sensory structures (the membranous labyrinth) containing fluid (endolymph) surrounded by fluid (perilymph) and encased in a bony cavity (the bony labyrinth). It consists of two chamber…	10.811% (12/111)	0.00869753	2.06	ENSG00000066468;ENSG00000075275;ENSG00000095397;ENSG00000107736;ENSG00000112655;ENSG00000132932;ENSG00000139304;ENSG00000165730;ENSG00000168234;ENSG00000179348;ENSG00000196586;ENSG00000255833	FGFR2;CELSR1;WHRN;CDH23;PTK7;ATP8A2;PTPRQ;STOX1;TTC39C;GATA2;MYO6;TIFAB	3.604% (4/111)	0.0140505	1.85	NA	NA	1.802% (2/111)	0.0275705	1.56	NA	NA	0% (0/111)	0.0107078	1.97	NA	NA	0% (0/111)	0.0149246	1.83	NA	NA
2	9.22	GO:0001502	cartilage condensation	The condensation of mesenchymal cells that have been committed to differentiate into chondrocytes.	10% (2/20)	0.00338202	2.47	ENSG00000112062;ENSG00000126351	MAPK14;THRA	5% (1/20)	0.00604861	2.22	ENSG00000112062	MAPK14	0% (0/20)	0.00201035	2.7	NA	NA	5% (1/20)	0.00691261	2.16	ENSG00000112062	MAPK14	0% (0/20)	0.00188969	2.72	NA	NA
2	9.74	GO:0060363	cranial suture morphogenesis	The process in which any suture between cranial bones is generated and organized.	0% (0/9)	0.000545214	3.26	NA	NA	0% (0/9)	0.00148601	2.83	NA	NA	0% (0/9)	0.00181638	2.74	NA	NA	0% (0/9)	0.00157668	2.8	NA	NA	0% (0/9)	0.00176295	2.75	NA	NA
2	6.36	GO:0048705	skeletal system morphogenesis	The process in which the anatomical structures of the skeleton are generated and organized.	14.103% (33/234)	0.16117	0.79	NA	NA	5.128% (12/234)	0.0194987	1.71	NA	NA	0.427% (1/234)	0.00474558	2.32	ENSG00000081189	MEF2C	2.564% (6/234)	0.058531	1.23	NA	NA	1.282% (3/234)	0.00856043	2.07	ENSG00000012223;ENSG00000081189;ENSG00000119042	LTF;MEF2C;SATB2
2	7.81	GO:0060350	endochondral bone morphogenesis	The process in which bones are generated and organized as a result of the conversion of initial cartilaginous anlage into bone.	14.516% (9/62)	0.0181939	1.74	NA	NA	4.839% (3/62)	0.0265664	1.58	NA	NA	1.613% (1/62)	0.0317303	1.5	NA	NA	1.613% (1/62)	0.00804886	2.09	ENSG00000197467	COL13A1	1.613% (1/62)	0.0280311	1.55	NA	NA
2	7.39	GO:0042475	odontogenesis of dentin-containing tooth	The process whose specific outcome is the progression of a dentin-containing tooth over time, from its formation to the mature structure. A dentin-containing tooth is a hard, bony organ borne on the jaw or other bone of a vertebrate, and is composed mainly of dentin, a dense calcified substance, covered by a layer of enamel.	9.474% (9/95)	0.000449154	3.35	ENSG00000108950;ENSG00000115221;ENSG00000116478;ENSG00000121989;ENSG00000135960;ENSG00000148926;ENSG00000154856;ENSG00000158813;ENSG00000168036	FAM20A;ITGB6;HDAC1;ACVR2A;EDAR;ADM;APCDD1;EDA;CTNNB1	5.263% (5/95)	0.0108253	1.97	NA	NA	0% (0/95)	0.00151515	2.82	NA	NA	2.105% (2/95)	0.00244102	2.61	ENSG00000108950;ENSG00000135960	FAM20A;EDAR	0% (0/95)	0.00123249	2.91	NA	NA
2	6.98	GO:0042476	odontogenesis	The process whose specific outcome is the progression of a tooth or teeth over time, from formation to the mature structure(s). A tooth is any hard bony, calcareous, or chitinous organ found in the mouth or pharynx of an animal and used in procuring or masticating food.	12.593% (17/135)	0.529346	0.28	NA	NA	4.444% (6/135)	0.00389253	2.41	ENSG00000108950;ENSG00000121989;ENSG00000148926;ENSG00000154856;ENSG00000158813;ENSG00000175894	FAM20A;ACVR2A;ADM;APCDD1;EDA;TSPEAR	0% (0/135)	0.246697	0.61	NA	NA	2.222% (3/135)	0.314993	0.5	NA	NA	0.741% (1/135)	0.376675	0.42	NA	NA
2	4.3	GO:0009887	animal organ morphogenesis	Morphogenesis of an animal organ. An organ is defined as a tissue or set of tissues that work together to perform a specific function or functions. Morphogenesis is the process in which anatomical structures are generated and organized. Organs are commonly observed as visibly distinct structures, but may also exist as loosely associated clusters of cells that work together to perform a specific f…	13.76% (142/1032)	0.0571212	1.24	NA	NA	4.264% (44/1032)	0.0232085	1.63	NA	NA	0.291% (3/1032)	0.00514675	2.29	ENSG00000081189;ENSG00000112655;ENSG00000186716	MEF2C;PTK7;BCR	1.938% (20/1032)	0.00232598	2.63	ENSG00000012223;ENSG00000082014;ENSG00000089041;ENSG00000092200;ENSG00000108950;ENSG00000112062;ENSG00000122641;ENSG00000135960;ENSG00000138685;ENSG00000140416;ENSG00000144290;ENSG00000154734;ENSG00000157168;ENSG00000162496;ENSG00000163251;ENSG00000183691;ENSG00000196159;ENSG00000196581;ENSG00000196781;ENSG00000197467	LTF;SMARCD3;P2RX7;RPGRIP1;FAM20A;MAPK14;INHBA;EDAR;FGF2;TPM1;SLC4A10;ADAMTS1;NRG1;DHRS3;FZD5;NOG;FAT4;AJAP1;TLE1;COL13A1	0.872% (9/1032)	0.00575227	2.24	ENSG00000012223;ENSG00000081189;ENSG00000114315;ENSG00000119042;ENSG00000122641;ENSG00000133424;ENSG00000139174;ENSG00000164056;ENSG00000196781	LTF;MEF2C;HES1;SATB2;INHBA;LARGE1;PRICKLE1;SPRY1;TLE1
2	7.52	GO:0048645	animal organ formation	The process pertaining to the initial formation of an animal organ from unspecified parts. The process begins with the specific processes that contribute to the appearance of the discrete structure, such as inductive events, and ends when the structural rudiment of the organ is recognizable, such as a condensation of mesenchymal cells into the organ rudiment. Organs are a natural part or structur…	12.857% (9/70)	0.0233031	1.63	NA	NA	4.286% (3/70)	0.00131997	2.88	ENSG00000081479;ENSG00000082014;ENSG00000183691	LRP2;SMARCD3;NOG	1.429% (1/70)	0.084187	1.07	NA	NA	4.286% (3/70)	0.00191799	2.72	ENSG00000082014;ENSG00000138685;ENSG00000183691	SMARCD3;FGF2;NOG	4.286% (3/70)	0.00802447	2.1	ENSG00000081189;ENSG00000114315;ENSG00000164056	MEF2C;HES1;SPRY1
2	8.2	GO:0010092	specification of animal organ identity	The regionalization process in which the identity of an animal organ primordium is specified. Identity is considered to be the aggregate of characteristics by which a structure is recognized.	10.526% (4/38)	0.221746	0.65	NA	NA	5.263% (2/38)	0.0112399	1.95	NA	NA	2.632% (1/38)	0.00907081	2.04	ENSG00000081189	MEF2C	5.263% (2/38)	0.0140994	1.85	NA	NA	5.263% (2/38)	0.0168387	1.77	NA	NA
3	9.82	GO:0003253	cardiac neural crest cell migration involved in outflow tract morphogenesis	The orderly movement of a neural crest cell from one site to another that will contribute to the morphogenesis of the outflow tract.	0% (0/10)	0.0041406	2.38	NA	NA	0% (0/10)	0.0200043	1.7	NA	NA	0% (0/10)	0.0277533	1.56	NA	NA	0% (0/10)	0.0220719	1.66	NA	NA	0% (0/10)	0.0265156	1.58	NA	NA
3	9.42	GO:0061309	cardiac neural crest cell development involved in outflow tract morphogenesis	The process aimed at the progression of a cardiac neural crest cell over time, from initial commitment of the cell to its specific fate, to the fully functional differentiated cell that contributes to the shaping of the outflow tract.	8.333% (1/12)	0.669392	0.17	NA	NA	0% (0/12)	0.00566841	2.25	NA	NA	0% (0/12)	0.00694909	2.16	NA	NA	0% (0/12)	0.00600955	2.22	NA	NA	8.333% (1/12)	0.0354293	1.45	NA	NA
3	7.5	GO:0014032	neural crest cell development	The process aimed at the progression of a neural crest cell over time, from initial commitment of the cell to its specific fate, to the fully functional differentiated cell.	19.753% (16/81)	0.186102	0.73	NA	NA	8.642% (7/81)	0.046924	1.33	NA	NA	0% (0/81)	0.0158116	1.8	NA	NA	1.235% (1/81)	0.146529	0.83	NA	NA	1.235% (1/81)	0.00307622	2.51	ENSG00000114315	HES1
3	10.23	GO:1901166	neural crest cell migration involved in autonomic nervous system development	NA	16.667% (1/6)	0.00885836	2.05	ENSG00000115414	FN1	16.667% (1/6)	0.0155512	1.81	NA	NA	0% (0/6)	0.00121466	2.92	NA	NA	0% (0/6)	0.00109929	2.96	NA	NA	0% (0/6)	0.00119049	2.92	NA	NA
3	7.86	GO:0001755	neural crest cell migration	The characteristic movement of cells from the dorsal ridge of the neural tube to a variety of locations in a vertebrate embryo.	13.793% (8/58)	0.302196	0.52	NA	NA	8.621% (5/58)	0.0220034	1.66	NA	NA	0% (0/58)	0.0124914	1.9	NA	NA	0% (0/58)	0.00649208	2.19	NA	NA	0% (0/58)	0.0109668	1.96	NA	NA
4	8.97	GO:2001014	regulation of skeletal muscle cell differentiation	NA	10% (2/20)	0.00656961	2.18	ENSG00000068024;ENSG00000154928	HDAC4;EPHB1	5% (1/20)	0.0313034	1.5	NA	NA	5% (1/20)	0.0429607	1.37	NA	NA	0% (0/20)	0.00991898	2	NA	NA	5% (1/20)	0.0410548	1.39	NA	NA
4	7.72	GO:0035914	skeletal muscle cell differentiation	The process in which a relatively unspecialized cell acquires specialized features of a skeletal muscle cell, a somatic cell located in skeletal muscle.	18.182% (14/77)	0.119377	0.92	NA	NA	3.896% (3/77)	0.00323217	2.49	ENSG00000068024;ENSG00000108924;ENSG00000164105	HDAC4;HLF;SAP30	1.299% (1/77)	0.00224779	2.65	ENSG00000081189	MEF2C	1.299% (1/77)	0.0040961	2.39	ENSG00000164105	SAP30	2.597% (2/77)	0.00410929	2.39	ENSG00000081189;ENSG00000133424	MEF2C;LARGE1
4	10	GO:0045843	negative regulation of striated muscle tissue development	Any process that stops, prevents, or reduces the frequency, rate or extent of striated muscle development.	0% (0/8)	0.0090386	2.04	NA	NA	0% (0/8)	0.0232814	1.63	NA	NA	0% (0/8)	0.0285182	1.54	NA	NA	0% (0/8)	0.0249903	1.6	NA	NA	0% (0/8)	0.0277097	1.56	NA	NA
4	9.17	GO:0016202	regulation of striated muscle tissue development	Any process that modulates the frequency, rate or extent of striated muscle development.	0% (0/19)	0.0247667	1.61	NA	NA	0% (0/19)	0.00658267	2.18	NA	NA	0% (0/19)	0.0101753	1.99	NA	NA	0% (0/19)	0.0075469	2.12	NA	NA	0% (0/19)	0.00957511	2.02	NA	NA
4	10.11	GO:2000727	positive regulation of cardiac muscle cell differentiation	NA	0% (0/8)	0.00429736	2.37	NA	NA	0% (0/8)	0.0150257	1.82	NA	NA	12.5% (1/8)	0.110738	0.96	NA	NA	0% (0/8)	0.0163267	1.79	NA	NA	12.5% (1/8)	0.107611	0.97	NA	NA
4	6.6	GO:0035051	cardiocyte differentiation	The process in which a relatively unspecialized cell acquires the specialized structural and/or functional features of a cell that will form part of the cardiac organ of an individual.	12.752% (19/149)	0.0352713	1.45	NA	NA	4.698% (7/149)	0.0050504	2.3	ENSG00000068305;ENSG00000115170;ENSG00000151320;ENSG00000155657;ENSG00000157168;ENSG00000187955;ENSG00000198796	MEF2A;ACVR1;AKAP6;TTN;NRG1;COL14A1;ALPK2	0.671% (1/149)	0.00597166	2.22	ENSG00000081189	MEF2C	2.685% (4/149)	0.0148	1.83	NA	NA	5.369% (8/149)	0.0618746	1.21	NA	NA
4	7.52	GO:0055013	cardiac muscle cell development	The process whose specific outcome is the progression of a cardiac muscle cell over time, from its formation to the mature state.	13.924% (11/79)	0.00119436	2.92	ENSG00000068305;ENSG00000114861;ENSG00000115641;ENSG00000124006;ENSG00000143995;ENSG00000148814;ENSG00000155657;ENSG00000170312;ENSG00000183023;ENSG00000187955;ENSG00000198796	MEF2A;FOXP1;FHL2;OBSL1;MEIS1;LRRC27;TTN;CDK1;SLC8A1;COL14A1;ALPK2	6.329% (5/79)	0.00666497	2.18	ENSG00000068305;ENSG00000151320;ENSG00000155657;ENSG00000187955;ENSG00000198796	MEF2A;AKAP6;TTN;COL14A1;ALPK2	0% (0/79)	0.00202226	2.69	NA	NA	1.266% (1/79)	0.00203859	2.69	ENSG00000151320	AKAP6	3.797% (3/79)	0.0153738	1.81	NA	NA
4	7.01	GO:0055007	cardiac muscle cell differentiation	The process in which a cardiac muscle precursor cell acquires specialized features of a cardiac muscle cell. Cardiac muscle cells are striated muscle cells that are responsible for heart contraction.	12.931% (15/116)	0.112684	0.95	NA	NA	6.034% (7/116)	0.0647172	1.19	NA	NA	0.862% (1/116)	0.0525205	1.28	NA	NA	2.586% (3/116)	0.0453106	1.34	NA	NA	4.31% (5/116)	0.00618548	2.21	ENSG00000081189;ENSG00000133424;ENSG00000139174;ENSG00000150093;ENSG00000151320	MEF2C;LARGE1;PRICKLE1;ITGB1;AKAP6
4	9.31	GO:0003163	sinoatrial node development	The process whose specific outcome is the progression of the sinoatrial (SA) node over time, from its formation to the mature structure. The SA node is part of the cardiac conduction system that controls the timing of heart muscle contraction. It relays electrical signals to the AV node.	0% (0/12)	0.00350591	2.46	NA	NA	0% (0/12)	0.013112	1.88	NA	NA	0% (0/12)	0.0172837	1.76	NA	NA	0% (0/12)	0.0144237	1.84	NA	NA	0% (0/12)	0.0166084	1.78	NA	NA
4	6.14	GO:0048738	cardiac muscle tissue development	The process whose specific outcome is the progression of cardiac muscle over time, from its formation to the mature structure.	11.79% (27/229)	0.0040881	2.39	ENSG00000008083;ENSG00000066468;ENSG00000068305;ENSG00000081479;ENSG00000106799;ENSG00000109083;ENSG00000112062;ENSG00000114861;ENSG00000115170;ENSG00000115641;ENSG00000124006;ENSG00000125686;ENSG00000128918;ENSG00000143995;ENSG00000148814;ENSG00000149256;ENSG00000150093;ENSG00000155657;ENSG00000157168;ENSG00000164442;ENSG00000170312;ENSG00000181744;ENSG00000183023;ENSG00000183691;ENSG00000187486…	JARID2;FGFR2;MEF2A;LRP2;TGFBR1;IFT20;MAPK14;FOXP1;ACVR1;FHL2;OBSL1;MED1;ALDH1A2;MEIS1;LRRC27;TENM4;ITGB1;TTN;NRG1;CITED2;CDK1;DIPK2A;SLC8A1;NOG;KCNJ11;COL14A1;ALPK2	4.803% (11/229)	0.00253404	2.6	ENSG00000008083;ENSG00000068305;ENSG00000081479;ENSG00000112062;ENSG00000115170;ENSG00000151320;ENSG00000155657;ENSG00000157168;ENSG00000183691;ENSG00000187955;ENSG00000198796	JARID2;MEF2A;LRP2;MAPK14;ACVR1;AKAP6;TTN;NRG1;NOG;COL14A1;ALPK2	0.437% (1/229)	0.0039449	2.4	ENSG00000081189	MEF2C	3.057% (7/229)	0.00421047	2.38	ENSG00000112062;ENSG00000138685;ENSG00000140416;ENSG00000150093;ENSG00000151320;ENSG00000157168;ENSG00000183691	MAPK14;FGF2;TPM1;ITGB1;AKAP6;NRG1;NOG	2.183% (5/229)	0.0148611	1.83	NA	NA
4	7.98	GO:0003161	cardiac conduction system development	The process whose specific outcome is the progression of the cardiac conduction system over time, from its formation to the mature structure. The cardiac conduction system consists of specialized cardiomyocytes that regulate the frequency of heart beat.	0% (0/37)	0.00616504	2.21	NA	NA	0% (0/37)	0.0214243	1.67	NA	NA	0% (0/37)	0.0457685	1.34	NA	NA	0% (0/37)	0.0267844	1.57	NA	NA	0% (0/37)	0.041174	1.39	NA	NA
4	6.8	GO:0003279	cardiac septum development	The progression of a cardiac septum over time, from its initial formation to the mature structure.	15.741% (17/108)	0.00640621	2.19	ENSG00000006125;ENSG00000011143;ENSG00000057657;ENSG00000066468;ENSG00000081479;ENSG00000101384;ENSG00000106799;ENSG00000112655;ENSG00000115170;ENSG00000145362;ENSG00000162496;ENSG00000162775;ENSG00000163513;ENSG00000164442;ENSG00000183691;ENSG00000184347;ENSG00000204217	AP2B1;MKS1;PRDM1;FGFR2;LRP2;JAG1;TGFBR1;PTK7;ACVR1;ANK2;DHRS3;RBM15;TGFBR2;CITED2;NOG;SLIT3;BMPR2	8.333% (9/108)	0.00501274	2.3	ENSG00000057657;ENSG00000081479;ENSG00000099250;ENSG00000112655;ENSG00000115170;ENSG00000134817;ENSG00000145362;ENSG00000162496;ENSG00000183691	PRDM1;LRP2;NRP1;PTK7;ACVR1;APLNR;ANK2;DHRS3;NOG	0.926% (1/108)	0.00672043	2.17	ENSG00000112655	PTK7	2.778% (3/108)	0.00517124	2.29	ENSG00000006125;ENSG00000162496;ENSG00000183691	AP2B1;DHRS3;NOG	0.926% (1/108)	0.0021531	2.67	ENSG00000114315	HES1
4	8.03	GO:0003176	aortic valve development	The progression of the aortic valve over time, from its formation to the mature structure.	18.605% (8/43)	0.0515902	1.29	NA	NA	0% (0/43)	0.00862806	2.06	NA	NA	0% (0/43)	0.0191411	1.72	NA	NA	0% (0/43)	0.0110569	1.96	NA	NA	0% (0/43)	0.0171429	1.77	NA	NA
4	6.91	GO:0003170	heart valve development	The progression of a heart valve over time, from its formation to the mature structure. A heart valve is a structure that restricts the flow of blood to different regions of the heart and forms from an endocardial cushion.	14.865% (11/74)	0.0156832	1.8	NA	NA	4.054% (3/74)	0.189141	0.72	NA	NA	1.351% (1/74)	0.00950699	2.02	ENSG00000081189	MEF2C	0% (0/74)	0.00268754	2.57	NA	NA	1.351% (1/74)	0.00854617	2.07	ENSG00000081189	MEF2C
4	4.61	GO:0007507	heart development	The process whose specific outcome is the progression of the heart over time, from its formation to the mature structure. The heart is a hollow, muscular organ, which, by contracting rhythmically, keeps up the circulation of the blood.	13.758% (82/596)	0.0267061	1.57	NA	NA	4.53% (27/596)	0.0736616	1.13	NA	NA	0.336% (2/596)	0.0403518	1.39	NA	NA	2.685% (16/596)	0.0399428	1.4	NA	NA	1.342% (8/596)	0.00788381	2.1	ENSG00000081189;ENSG00000114315;ENSG00000122641;ENSG00000133424;ENSG00000139174;ENSG00000150093;ENSG00000151320;ENSG00000164056	MEF2C;HES1;INHBA;LARGE1;PRICKLE1;ITGB1;AKAP6;SPRY1
5	7.1	GO:0060840	artery development	The progression of the artery over time, from its initial formation to the mature structure. An artery is a blood vessel that carries blood away from the heart to a capillary bed.	17.308% (18/104)	0.00540788	2.27	ENSG00000006125;ENSG00000057657;ENSG00000065534;ENSG00000072736;ENSG00000081479;ENSG00000101384;ENSG00000106799;ENSG00000115310;ENSG00000118762;ENSG00000129038;ENSG00000130164;ENSG00000163513;ENSG00000164442;ENSG00000167034;ENSG00000183691;ENSG00000196712;ENSG00000197496;ENSG00000204217	AP2B1;PRDM1;MYLK;NFATC3;LRP2;JAG1;TGFBR1;RTN4;PKD2;LOXL1;LDLR;TGFBR2;CITED2;NKX3-1;NOG;NF1;SLC2A10;BMPR2	6.731% (7/104)	0.0787286	1.1	NA	NA	0% (0/104)	0.730716	0.14	NA	NA	1.923% (2/104)	0.167502	0.78	NA	NA	1.923% (2/104)	0.0949304	1.02	NA	NA
5	4.89	GO:0001568	blood vessel development	The process whose specific outcome is the progression of a blood vessel over time, from its formation to the mature structure. The blood vessel is the vasculature carrying blood.	17.427% (126/723)	0.00489044	2.31	ENSG00000005108;ENSG00000006125;ENSG00000007372;ENSG00000011465;ENSG00000037280;ENSG00000057657;ENSG00000058668;ENSG00000060237;ENSG00000064989;ENSG00000065534;ENSG00000066056;ENSG00000066468;ENSG00000067066;ENSG00000067900;ENSG00000072134;ENSG00000072736;ENSG00000078098;ENSG00000081479;ENSG00000091129;ENSG00000100292;ENSG00000101384;ENSG00000101752;ENSG00000102760;ENSG00000105429;ENSG00000105855…	THSD7A;AP2B1;PAX6;DCN;FLT4;PRDM1;ATP2B4;WNK1;CALCRL;MYLK;TIE1;FGFR2;SP100;ROCK1;EPN2;NFATC3;FAP;LRP2;NRCAM;HMOX1;JAG1;MIB1;RGCC;MEGF8;ITGB8;C1GALT1;TGFBR1;FBXW7;ELK3;SASH1;MAPK14;PTK7;PDCD10;NCL;ACVR1;RTN4;FN1;SOS1;EPAS1;NFE2L2;RAP1A;LEPR;GADD45A;TNFAIP3;PKD2;PGF;TEK;CCR2;NR4A1;IL1B;MED1;C3;AAMP;ALDH1A2;LOXL1;E2F8;SAT1;LDLR;COL5A1;ATP5IF1;ANGPTL6;ZNF304;PPARG;EMILIN2;RAMP1;SERPINF1;CHI3L1;VAV3;RO…	5.671% (41/723)	0.000312027	3.51	ENSG00000005108;ENSG00000010327;ENSG00000057657;ENSG00000065534;ENSG00000067066;ENSG00000078098;ENSG00000081479;ENSG00000091129;ENSG00000099250;ENSG00000105855;ENSG00000111145;ENSG00000111961;ENSG00000112062;ENSG00000112655;ENSG00000115170;ENSG00000115904;ENSG00000116044;ENSG00000116717;ENSG00000120156;ENSG00000121807;ENSG00000130164;ENSG00000132170;ENSG00000133048;ENSG00000134817;ENSG00000135046…	THSD7A;STAB1;PRDM1;MYLK;SP100;FAP;LRP2;NRCAM;NRP1;ITGB8;ELK3;SASH1;MAPK14;PTK7;ACVR1;SOS1;NFE2L2;GADD45A;TEK;CCR2;LDLR;PPARG;CHI3L1;APLNR;ANXA1;CYP1B1;ARHGAP24;ANXA3;ADM;GPR15;ANGPT1;JAK1;PF4;CAMP;MINAR1;CDH2;GATA2;CCR3;NOG;SOCS3;ZFP36L1	0.415% (3/723)	0.0127187	1.9	NA	NA	3.043% (22/723)	0.000449187	3.35	ENSG00000006125;ENSG00000067066;ENSG00000091129;ENSG00000112062;ENSG00000116678;ENSG00000116717;ENSG00000119630;ENSG00000132386;ENSG00000136634;ENSG00000138685;ENSG00000138772;ENSG00000150093;ENSG00000152270;ENSG00000154734;ENSG00000161381;ENSG00000162434;ENSG00000163251;ENSG00000164047;ENSG00000167664;ENSG00000171860;ENSG00000183625;ENSG00000183691	AP2B1;SP100;NRCAM;MAPK14;LEPR;GADD45A;PGF;SERPINF1;IL10;FGF2;ANXA3;ITGB1;PDE3B;ADAMTS1;PLXDC1;JAK1;FZD5;CAMP;TMIGD2;C3AR1;CCR3;NOG	1.107% (8/723)	0.00398531	2.4	ENSG00000081189;ENSG00000091129;ENSG00000114315;ENSG00000133424;ENSG00000139174;ENSG00000150093;ENSG00000164047;ENSG00000172071	MEF2C;NRCAM;HES1;LARGE1;PRICKLE1;ITGB1;CAMP;EIF2AK3
5	10.23	GO:0035905	ascending aorta development	The progression of the ascending aorta over time, from its initial formation to the mature structure. The ascending aorta is the portion of the aorta in a two-pass circulatory system that lies between the heart and the arch of aorta. In a two-pass circulatory system blood passes twice through the heart to supply the body once.	0% (0/5)	0.00792744	2.1	NA	NA	0% (0/5)	0.0161647	1.79	NA	NA	0% (0/5)	0.0188515	1.72	NA	NA	0% (0/5)	0.0170447	1.77	NA	NA	20% (1/5)	0.154643	0.81	NA	NA
5	7.88	GO:0035904	aorta development	The progression of the aorta over time, from its initial formation to the mature structure. An aorta is an artery that carries blood from the heart to other parts of the body.	14.754% (9/61)	0.237371	0.62	NA	NA	6.557% (4/61)	0.0894179	1.05	NA	NA	0% (0/61)	0.00801738	2.1	NA	NA	1.639% (1/61)	0.0191859	1.72	NA	NA	3.279% (2/61)	0.0154221	1.81	NA	NA
5	10.11	GO:0072104	glomerular capillary formation	The process that gives rise to a glomerular capillary. This process pertains to the initial formation of a structure from unspecified parts.	0% (0/6)	0.00274218	2.56	NA	NA	0% (0/6)	0.00639351	2.19	NA	NA	0% (0/6)	0.00765789	2.12	NA	NA	0% (0/6)	0.00680021	2.17	NA	NA	0% (0/6)	0.00746359	2.13	NA	NA
5	7.52	GO:0001570	vasculogenesis	The differentiation of endothelial cells from progenitor cells during blood vessel development, and the de novo formation of blood vessels and tubes.	15.476% (13/84)	0.0143397	1.84	NA	NA	5.952% (5/84)	0.0152409	1.82	NA	NA	0% (0/84)	0.00346825	2.46	NA	NA	0% (0/84)	0.00126797	2.9	NA	NA	0% (0/84)	0.00283273	2.55	NA	NA
5	5.07	GO:0048514	blood vessel morphogenesis	The process in which the anatomical structures of blood vessels are generated and organized. The blood vessel is the vasculature carrying blood.	17.863% (112/627)	0.00355324	2.45	ENSG00000005108;ENSG00000011465;ENSG00000037280;ENSG00000057657;ENSG00000058668;ENSG00000060237;ENSG00000064989;ENSG00000065534;ENSG00000066056;ENSG00000066468;ENSG00000067066;ENSG00000067900;ENSG00000072134;ENSG00000072736;ENSG00000078098;ENSG00000081479;ENSG00000091129;ENSG00000100292;ENSG00000101384;ENSG00000102760;ENSG00000105855;ENSG00000106392;ENSG00000106799;ENSG00000109670;ENSG00000111145…	THSD7A;DCN;FLT4;PRDM1;ATP2B4;WNK1;CALCRL;MYLK;TIE1;FGFR2;SP100;ROCK1;EPN2;NFATC3;FAP;LRP2;NRCAM;HMOX1;JAG1;RGCC;ITGB8;C1GALT1;TGFBR1;FBXW7;ELK3;SASH1;MAPK14;PDCD10;NCL;ACVR1;RTN4;FN1;SOS1;EPAS1;NFE2L2;RAP1A;LEPR;GADD45A;TNFAIP3;PKD2;PGF;TEK;CCR2;NR4A1;IL1B;MED1;C3;AAMP;E2F8;SAT1;LDLR;ATP5IF1;ANGPTL6;ZNF304;PPARG;EMILIN2;RAMP1;SERPINF1;CHI3L1;VAV3;ROCK2;ANXA1;IL10;CCN3;PRCP;CYP1B1;ITGAV;ANXA3;WARS…	6.22% (39/627)	0.0946081	1.02	NA	NA	0.159% (1/627)	0.0688514	1.16	NA	NA	3.349% (21/627)	0.0626575	1.2	NA	NA	0.797% (5/627)	0.0677858	1.17	NA	NA
5	5.34	GO:0001525	angiogenesis	Blood vessel formation when new vessels emerge from the proliferation of pre-existing blood vessels.	18.333% (99/540)	0.0256248	1.59	NA	NA	5.741% (31/540)	0.00024607	3.61	ENSG00000005108;ENSG00000010327;ENSG00000067066;ENSG00000078098;ENSG00000091129;ENSG00000099250;ENSG00000105855;ENSG00000111145;ENSG00000111961;ENSG00000112062;ENSG00000115170;ENSG00000116044;ENSG00000116717;ENSG00000120156;ENSG00000121807;ENSG00000132170;ENSG00000133048;ENSG00000134817;ENSG00000135046;ENSG00000138061;ENSG00000138639;ENSG00000138772;ENSG00000148926;ENSG00000154165;ENSG00000154188…	THSD7A;STAB1;SP100;FAP;NRCAM;NRP1;ITGB8;ELK3;SASH1;MAPK14;ACVR1;NFE2L2;GADD45A;TEK;CCR2;PPARG;CHI3L1;APLNR;ANXA1;CYP1B1;ARHGAP24;ANXA3;ADM;GPR15;ANGPT1;JAK1;PF4;CAMP;MINAR1;GATA2;CCR3	0.185% (1/540)	1.42e-05	4.85	ENSG00000142798	HSPG2	3.704% (20/540)	0.000226993	3.64	ENSG00000067066;ENSG00000091129;ENSG00000112062;ENSG00000116678;ENSG00000116717;ENSG00000119630;ENSG00000132386;ENSG00000136634;ENSG00000138685;ENSG00000138772;ENSG00000150093;ENSG00000152270;ENSG00000154734;ENSG00000161381;ENSG00000162434;ENSG00000163251;ENSG00000164047;ENSG00000167664;ENSG00000171860;ENSG00000183625	SP100;NRCAM;MAPK14;LEPR;GADD45A;PGF;SERPINF1;IL10;FGF2;ANXA3;ITGB1;PDE3B;ADAMTS1;PLXDC1;JAK1;FZD5;CAMP;TMIGD2;C3AR1;CCR3	0.741% (4/540)	2.13e-05	4.67	ENSG00000091129;ENSG00000150093;ENSG00000164047;ENSG00000172071	NRCAM;ITGB1;CAMP;EIF2AK3
5	9.67	GO:0061626	pharyngeal arch artery morphogenesis	The process in which the anatomical structures of a pharyngeal arch artery is generated and organized. The pharyngeal arch arteries are a series of six paired embryological vascular structures, the development of which give rise to several major arteries, such as the stapedial artery, the middle meningeal artery, the internal carotid artery and the pulmonary artery.	11.111% (1/9)	0.00563625	2.25	ENSG00000183691	NOG	11.111% (1/9)	0.012814	1.89	NA	NA	0% (0/9)	0.0150673	1.82	NA	NA	11.111% (1/9)	0.0134233	1.87	NA	NA	11.111% (1/9)	0.0816967	1.09	NA	NA
5	8.39	GO:0035909	aorta morphogenesis	The process in which the anatomical structures of an aorta are generated and organized. An aorta is an artery that carries blood from the heart to other parts of the body.	8.824% (3/34)	0.000986913	3.01	ENSG00000065534;ENSG00000101384;ENSG00000163513	MYLK;JAG1;TGFBR2	2.941% (1/34)	0.00413069	2.38	ENSG00000065534	MYLK	0% (0/34)	0.0030063	2.52	NA	NA	0% (0/34)	0.00162312	2.79	NA	NA	2.941% (1/34)	0.0081421	2.09	ENSG00000114315	HES1
5	7.4	GO:0048844	artery morphogenesis	The process in which the anatomical structures of arterial blood vessels are generated and organized. Arteries are blood vessels that transport blood from the heart to the body and its organs.	18.056% (13/72)	0.0266301	1.57	NA	NA	8.333% (6/72)	0.00259433	2.59	ENSG00000057657;ENSG00000065534;ENSG00000081479;ENSG00000099250;ENSG00000130164;ENSG00000183691	PRDM1;MYLK;LRP2;NRP1;LDLR;NOG	0% (0/72)	4.33e-05	4.36	NA	NA	1.389% (1/72)	2.88e-05	4.54	ENSG00000183691	NOG	1.389% (1/72)	3.99e-05	4.4	ENSG00000114315	HES1
6	8.81	GO:0035116	embryonic hindlimb morphogenesis	The process, occurring in the embryo, by which the anatomical structures of the hindlimbs are generated and organized. The hindlimbs are the posterior limbs of an animal.	17.857% (5/28)	0.0200844	1.7	NA	NA	0% (0/28)	0.00148362	2.83	NA	NA	0% (0/28)	0.00326644	2.49	NA	NA	3.571% (1/28)	0.00666327	2.18	ENSG00000109906	ZBTB16	3.571% (1/28)	0.00987444	2.01	ENSG00000144218	AFF3
6	7.98	GO:0042733	embryonic digit morphogenesis	The process, occurring in the embryo, by which the anatomical structures of the digit are generated and organized. A digit is one of the terminal divisions of an appendage, such as a finger or toe.	16.393% (10/61)	0.00114827	2.94	ENSG00000011143;ENSG00000091436;ENSG00000104331;ENSG00000108641;ENSG00000109906;ENSG00000116478;ENSG00000144320;ENSG00000168036;ENSG00000179029;ENSG00000183691	MKS1;MAP3K20;BPNT2;B9D1;ZBTB16;HDAC1;LNPK;CTNNB1;TMEM107;NOG	4.918% (3/61)	0.000437865	3.36	ENSG00000091436;ENSG00000179029;ENSG00000183691	MAP3K20;TMEM107;NOG	0% (0/61)	0.000517723	3.29	NA	NA	4.918% (3/61)	0.00160186	2.8	ENSG00000091436;ENSG00000109906;ENSG00000183691	MAP3K20;ZBTB16;NOG	1.639% (1/61)	0.00115794	2.94	ENSG00000139174	PRICKLE1
6	8.67	GO:0035115	embryonic forelimb morphogenesis	The process, occurring in the embryo, by which the anatomical structures of the forelimb are generated and organized. The forelimbs are the front limbs of an animal, e.g. the arms of a human.	12.121% (4/33)	0.000679393	3.17	ENSG00000108379;ENSG00000128918;ENSG00000144320;ENSG00000168036	WNT3;ALDH1A2;LNPK;CTNNB1	0% (0/33)	0.000232402	3.63	NA	NA	0% (0/33)	0.00058928	3.23	NA	NA	0% (0/33)	0.000309644	3.51	NA	NA	0% (0/33)	0.000517671	3.29	NA	NA
6	6.41	GO:0060173	limb development	The process whose specific outcome is the progression of a limb over time, from its formation to the mature structure. A limb is an appendage of an animal used for locomotion or grasping. Examples include legs, arms or some types of fin.	18.519% (35/189)	0.00654238	2.18	ENSG00000011143;ENSG00000056586;ENSG00000066468;ENSG00000073712;ENSG00000091436;ENSG00000104331;ENSG00000105429;ENSG00000108379;ENSG00000108641;ENSG00000109906;ENSG00000114166;ENSG00000116285;ENSG00000116478;ENSG00000117595;ENSG00000125686;ENSG00000128918;ENSG00000132470;ENSG00000138002;ENSG00000138829;ENSG00000141622;ENSG00000143952;ENSG00000144218;ENSG00000144320;ENSG00000151012;ENSG00000162599…	MKS1;RC3H2;FGFR2;FERMT2;MAP3K20;BPNT2;MEGF8;WNT3;B9D1;ZBTB16;KAT2B;ERRFI1;HDAC1;IRF6;MED1;ALDH1A2;ITGB4;IFT172;FBN2;ARK2C;VPS54;AFF3;LNPK;SLC7A11;NFIA;CTNNB1;TMEM107;ZNRF3;NOG;KREMEN1;ASPH;SMOC1;DMD;BMPR2;PBX2	3.704% (7/189)	6.28e-05	4.2	ENSG00000091436;ENSG00000138829;ENSG00000151012;ENSG00000179029;ENSG00000183691;ENSG00000183762;ENSG00000198363	MAP3K20;FBN2;SLC7A11;TMEM107;NOG;KREMEN1;ASPH	0% (0/189)	9.01e-05	4.05	NA	NA	4.762% (9/189)	0.000516159	3.29	ENSG00000056586;ENSG00000091436;ENSG00000109906;ENSG00000114166;ENSG00000141622;ENSG00000151012;ENSG00000183691;ENSG00000183762;ENSG00000198363	RC3H2;MAP3K20;ZBTB16;KAT2B;ARK2C;SLC7A11;NOG;KREMEN1;ASPH	2.116% (4/189)	0.000412775	3.38	ENSG00000133424;ENSG00000139174;ENSG00000141622;ENSG00000144218	LARGE1;PRICKLE1;ARK2C;AFF3
6	8.5	GO:0035137	hindlimb morphogenesis	The process in which the anatomical structures of the hindlimb are generated and organized.	13.889% (5/36)	0.00656121	2.18	ENSG00000108379;ENSG00000109906;ENSG00000125686;ENSG00000144218;ENSG00000168036	WNT3;ZBTB16;MED1;AFF3;CTNNB1	0% (0/36)	0.068444	1.16	NA	NA	0% (0/36)	0.0789404	1.1	NA	NA	2.778% (1/36)	0.0717741	1.14	NA	NA	5.556% (2/36)	0.214816	0.67	NA	NA
6	9.47	GO:0007501	mesodermal cell fate specification	The cell fate determination process in which a cell becomes capable of differentiating autonomously into a mesoderm cell in an environment that is neutral with respect to the developmental pathway; upon specification, the cell fate can be reversed.	0% (0/13)	0.00430082	2.37	NA	NA	0% (0/13)	0.030576	1.51	NA	NA	0% (0/13)	0.0377916	1.42	NA	NA	0% (0/13)	0.034381	1.46	NA	NA	0% (0/13)	0.0371714	1.43	NA	NA
6	8.39	GO:0048333	mesodermal cell differentiation	The process in which a relatively unspecialized cell acquires the specialized features of a mesoderm cell.	12.121% (4/33)	0.615809	0.21	NA	NA	0% (0/33)	0.00668496	2.17	NA	NA	0% (0/33)	0.0138797	1.86	NA	NA	6.061% (2/33)	0.0566193	1.25	NA	NA	6.061% (2/33)	0.0774394	1.11	NA	NA
6	7.62	GO:0001707	mesoderm formation	The process that gives rise to the mesoderm. This process pertains to the initial formation of the structure from unspecified parts.	13.514% (10/74)	0.0661057	1.18	NA	NA	2.703% (2/74)	0.0546363	1.26	NA	NA	0% (0/74)	0.00294682	2.53	NA	NA	4.054% (3/74)	0.00615285	2.21	ENSG00000122641;ENSG00000150093;ENSG00000183691	INHBA;ITGB1;NOG	2.703% (2/74)	0.0112083	1.95	NA	NA
6	6.42	GO:0007369	gastrulation	A complex and coordinated series of cellular movements that occurs at the end of cleavage during embryonic development of most animals. The details of gastrulation vary from species to species, but usually result in the formation of the three primary germ layers, ectoderm, mesoderm and endoderm.	14.286% (28/196)	0.00525754	2.28	ENSG00000006712;ENSG00000060237;ENSG00000066468;ENSG00000102710;ENSG00000105429;ENSG00000108379;ENSG00000115170;ENSG00000115414;ENSG00000118113;ENSG00000121989;ENSG00000122641;ENSG00000130635;ENSG00000132470;ENSG00000136634;ENSG00000136689;ENSG00000137815;ENSG00000138448;ENSG00000142627;ENSG00000148204;ENSG00000149256;ENSG00000150093;ENSG00000158050;ENSG00000163513;ENSG00000168036;ENSG00000177963…	PAF1;WNK1;FGFR2;SUPT20H;MEGF8;WNT3;ACVR1;FN1;MMP8;ACVR2A;INHBA;COL5A1;ITGB4;IL10;IL1RN;RTF1;ITGAV;EPHA2;CRB2;TENM4;ITGB1;DUSP2;TGFBR2;CTNNB1;RIC8A;NOG;CTR9;BMPR2	3.061% (6/196)	0.00393816	2.4	ENSG00000115170;ENSG00000118113;ENSG00000121989;ENSG00000134817;ENSG00000136689;ENSG00000183691	ACVR1;MMP8;ACVR2A;APLNR;IL1RN;NOG	0% (0/196)	0.0039854	2.4	NA	NA	2.551% (5/196)	0.00477783	2.32	ENSG00000118113;ENSG00000122641;ENSG00000136634;ENSG00000150093;ENSG00000183691	MMP8;INHBA;IL10;ITGB1;NOG	2.041% (4/196)	0.0201321	1.7	NA	NA
6	6.93	GO:0001704	formation of primary germ layer	The formation of the ectoderm, mesoderm and endoderm during gastrulation.	14.729% (19/129)	0.0411627	1.39	NA	NA	2.326% (3/129)	0.031165	1.51	NA	NA	0% (0/129)	0.112252	0.95	NA	NA	3.101% (4/129)	0.124846	0.9	NA	NA	2.326% (3/129)	0.00549194	2.26	ENSG00000118113;ENSG00000122641;ENSG00000150093	MMP8;INHBA;ITGB1
6	10.11	GO:0060027	convergent extension involved in gastrulation	The morphogenetic process in which an epithelium narrows along one axis and lengthens in a perpendicular axis usually resulting in the formation of the three primary germ layers, ectoderm, mesoderm and endoderm.	0% (0/9)	0.000579533	3.24	NA	NA	0% (0/9)	0.00159004	2.8	NA	NA	0% (0/9)	0.0019438	2.71	NA	NA	0% (0/9)	0.00168856	2.77	NA	NA	0% (0/9)	0.00188693	2.72	NA	NA
6	6.83	GO:0016331	morphogenesis of embryonic epithelium	The process in which the anatomical structures of embryonic epithelia are generated and organized.	15.584% (24/154)	0.081142	1.09	NA	NA	3.247% (5/154)	0.00417953	2.38	ENSG00000081479;ENSG00000112655;ENSG00000148926;ENSG00000183691;ENSG00000204852	LRP2;PTK7;ADM;NOG;TCTN1	0.649% (1/154)	0.0118277	1.93	NA	NA	1.299% (2/154)	0.00571032	2.24	ENSG00000183691;ENSG00000204852	NOG;TCTN1	0.649% (1/154)	0.010259	1.99	NA	NA
6	7.38	GO:0009953	dorsal/ventral pattern formation	The regionalization process in which the areas along the dorsal/ventral axis are established that will lead to differences in cell differentiation. The dorsal/ventral axis is defined by a line that runs orthogonal to both the anterior/posterior and left/right axes. The dorsal end is defined by the upper or back side of an organism. The ventral end is defined by the lower or front side of an organ…	12.222% (11/90)	0.00135057	2.87	ENSG00000007372;ENSG00000108379;ENSG00000115170;ENSG00000138002;ENSG00000154309;ENSG00000168036;ENSG00000180875;ENSG00000183691;ENSG00000186063;ENSG00000187147;ENSG00000204852	PAX6;WNT3;ACVR1;IFT172;DISP1;CTNNB1;GREM2;NOG;AIDA;RNF220;TCTN1	5.556% (5/90)	0.129666	0.89	NA	NA	0% (0/90)	0.0591808	1.23	NA	NA	2.222% (2/90)	0.0519751	1.28	NA	NA	0% (0/90)	0.0513258	1.29	NA	NA
6	9.74	GO:0009950	dorsal/ventral axis specification	The establishment, maintenance and elaboration of the dorsal/ventral axis. The dorsal/ventral axis is defined by a line that runs orthogonal to both the anterior/posterior and left/right axes. The dorsal end is defined by the upper or back side of an organism. The ventral end is defined by the lower or front side of an organism.	23.077% (3/13)	0.0457587	1.34	NA	NA	0% (0/13)	0.00391433	2.41	NA	NA	0% (0/13)	0.00466727	2.33	NA	NA	0% (0/13)	0.00412439	2.38	NA	NA	0% (0/13)	0.00456344	2.34	NA	NA
6	7.26	GO:0035282	segmentation	The regionalization process that divides an organism or part of an organism into a series of semi-repetitive parts, or segments, often arranged along a longitudinal axis.	8.491% (9/106)	0.00708949	2.15	ENSG00000073536;ENSG00000101752;ENSG00000106003;ENSG00000128918;ENSG00000136099;ENSG00000148204;ENSG00000163251;ENSG00000167034;ENSG00000255833	NLE1;MIB1;LFNG;ALDH1A2;PCDH8;CRB2;FZD5;NKX3-1;TIFAB	1.887% (2/106)	0.783335	0.11	NA	NA	0% (0/106)	0.121424	0.92	NA	NA	0.943% (1/106)	0.0874503	1.06	NA	NA	0% (0/106)	0.104291	0.98	NA	NA
6	6.44	GO:0009952	anterior/posterior pattern specification	The regionalization process in which specific areas of cell differentiation are determined along the anterior-posterior axis. The anterior-posterior axis is defined by a line that runs from the head or mouth of an organism to the tail or opposite end of the organism.	10.222% (23/225)	0.000419457	3.38	ENSG00000007372;ENSG00000010361;ENSG00000073536;ENSG00000075275;ENSG00000101752;ENSG00000106003;ENSG00000106799;ENSG00000108379;ENSG00000109906;ENSG00000121989;ENSG00000128918;ENSG00000136099;ENSG00000148204;ENSG00000152804;ENSG00000163251;ENSG00000163349;ENSG00000167034;ENSG00000168036;ENSG00000183691;ENSG00000197121;ENSG00000204217;ENSG00000204227;ENSG00000255833	PAX6;FUZ;NLE1;CELSR1;MIB1;LFNG;TGFBR1;WNT3;ZBTB16;ACVR2A;ALDH1A2;PCDH8;CRB2;HHEX;FZD5;HIPK1;NKX3-1;CTNNB1;NOG;PGAP1;BMPR2;RING1;TIFAB	1.778% (4/225)	0.0930706	1.03	NA	NA	0% (0/225)	0.0341531	1.47	NA	NA	1.333% (3/225)	0.0240519	1.62	NA	NA	0.889% (2/225)	0.0513496	1.29	NA	NA
6	5.29	GO:0007389	pattern specification process	Any developmental process that results in the creation of defined areas or spaces within an organism to which cells respond and eventually are instructed to differentiate.	11.088% (53/478)	0.0195101	1.71	NA	NA	3.138% (15/478)	0.0145118	1.84	NA	NA	0.209% (1/478)	0.0097808	2.01	ENSG00000081189	MEF2C	1.674% (8/478)	0.02353	1.63	NA	NA	1.046% (5/478)	0.00737872	2.13	ENSG00000081189;ENSG00000114315;ENSG00000119042;ENSG00000139174;ENSG00000164056	MEF2C;HES1;SATB2;PRICKLE1;SPRY1
6	5.42	GO:0003002	regionalization	The pattern specification process that results in the subdivision of an axis or axes in space to define an area or volume in which specific patterns of cell differentiation will take place or in which cells interpret a specific environment.	10.599% (46/434)	0.167239	0.78	NA	NA	3.226% (14/434)	0.0539365	1.27	NA	NA	0.23% (1/434)	0.0309913	1.51	NA	NA	1.613% (7/434)	0.00668147	2.18	ENSG00000082014;ENSG00000109906;ENSG00000138685;ENSG00000163251;ENSG00000166171;ENSG00000183691;ENSG00000204852	SMARCD3;ZBTB16;FGF2;FZD5;DPCD;NOG;TCTN1	0.922% (4/434)	0.0156828	1.8	NA	NA
6	6.03	GO:0001701	in utero embryonic development	The process whose specific outcome is the progression of the embryo in the uterus over time, from formation of the zygote in the oviduct, to birth. An example of this process is found in Mus musculus.	18.978% (78/411)	5.83e-05	4.23	ENSG00000005513;ENSG00000013275;ENSG00000034053;ENSG00000037474;ENSG00000057657;ENSG00000066056;ENSG00000066468;ENSG00000066827;ENSG00000073536;ENSG00000083896;ENSG00000099956;ENSG00000100601;ENSG00000101752;ENSG00000101773;ENSG00000104320;ENSG00000104375;ENSG00000105011;ENSG00000106799;ENSG00000107282;ENSG00000107372;ENSG00000108641;ENSG00000109917;ENSG00000113758;ENSG00000115128;ENSG00000115170…	SOX8;PSMC4;APBA2;NSUN2;PRDM1;TIE1;FGFR2;ZFAT;NLE1;YTHDC1;SMARCB1;ALKBH1;MIB1;RBBP8;NBN;STK3;ASF1B;TGFBR1;APBA1;ZFAND5;B9D1;ZPR1;DBN1;SF3B6;ACVR1;RTN4;EPAS1;PKD2;UBE2B;NECAB1;MED1;EMG1;E2F8;CDKN1C;PRKCSH;LATS1;WDR74;NMT1;SKIL;IL10;RTF1;ADAM10;LPAR6;CUL4A;AKT1;HORMAD1;VASH2;C1orf43;VPS54;BTF3;ADM;ITGB1;PELO;ANGPT1;CPT2;CAPN2;FZD5;TGFBR2;CITED2;SPINT1;COPS2;SPINT2;CTNNB1;RRM2;TBL1XR1;RIC8A;GATA2;BCO…	3.65% (15/411)	9.17e-08	7.04	ENSG00000057657;ENSG00000105011;ENSG00000115170;ENSG00000129757;ENSG00000139679;ENSG00000143452;ENSG00000148926;ENSG00000154188;ENSG00000162909;ENSG00000179348;ENSG00000183691;ENSG00000184557;ENSG00000185650;ENSG00000187140;ENSG00000204852	PRDM1;ASF1B;ACVR1;CDKN1C;LPAR6;HORMAD1;ADM;ANGPT1;CAPN2;GATA2;NOG;SOCS3;ZFP36L1;FOXD3;TCTN1	0% (0/411)	2.23e-05	4.65	NA	NA	1.703% (7/411)	3.64e-08	7.44	ENSG00000034053;ENSG00000136634;ENSG00000150093;ENSG00000163251;ENSG00000166211;ENSG00000183691;ENSG00000204852	APBA2;IL10;ITGB1;FZD5;SPIC;NOG;TCTN1	0.73% (3/411)	1.63e-06	5.79	ENSG00000114315;ENSG00000129757;ENSG00000150093	HES1;CDKN1C;ITGB1
6	7.33	GO:0001824	blastocyst development	The process whose specific outcome is the progression of the blastocyst over time, from its formation to the mature structure. The mammalian blastocyst is a hollow ball of cells containing two cell types, the inner cell mass and the trophectoderm.	24.37% (29/119)	0.24603	0.61	NA	NA	3.361% (4/119)	0.0705927	1.15	NA	NA	0% (0/119)	0.00281729	2.55	NA	NA	0.84% (1/119)	0.0134	1.87	NA	NA	0% (0/119)	0.00227008	2.64	NA	NA
6	7.01	GO:0048706	embryonic skeletal system development	The process, occurring during the embryonic phase, whose specific outcome is the progression of the skeleton over time, from its formation to the mature structure.	10.938% (14/128)	0.202526	0.69	NA	NA	2.344% (3/128)	0.0143366	1.84	NA	NA	0% (0/128)	0.0171404	1.77	NA	NA	0.781% (1/128)	0.00728683	2.14	ENSG00000183691	NOG	0.781% (1/128)	0.0231183	1.64	NA	NA
6	5.24	GO:0043009	chordate embryonic development	The process whose specific outcome is the progression of the embryo over time, from zygote formation through a stage including a notochord and neural tube until birth or egg hatching.	16.542% (111/671)	0.133556	0.87	NA	NA	2.981% (20/671)	0.00380888	2.42	ENSG00000057657;ENSG00000081479;ENSG00000105011;ENSG00000112655;ENSG00000115170;ENSG00000121989;ENSG00000129757;ENSG00000139679;ENSG00000141543;ENSG00000143452;ENSG00000148926;ENSG00000154188;ENSG00000162909;ENSG00000179029;ENSG00000179348;ENSG00000183691;ENSG00000184557;ENSG00000185650;ENSG00000187140;ENSG00000204852	PRDM1;LRP2;ASF1B;PTK7;ACVR1;ACVR2A;CDKN1C;LPAR6;EIF4A3;HORMAD1;ADM;ANGPT1;CAPN2;TMEM107;GATA2;NOG;SOCS3;ZFP36L1;FOXD3;TCTN1	0.149% (1/671)	0.0108366	1.97	NA	NA	1.043% (7/671)	0.0199057	1.7	NA	NA	0.745% (5/671)	0.0153284	1.81	NA	NA
6	8.52	GO:0060037	pharyngeal system development	The process whose specific outcome is the progression of the pharyngeal system over time, from its formation to the mature structure. The pharyngeal system is a transient embryonic complex that is specific to vertebrates. It comprises the pharyngeal arches, bulges of tissues of mesoderm and neural crest derivation through which pass nerves and pharyngeal arch arteries. The arches are separated in…	13.333% (4/30)	0.0131175	1.88	NA	NA	6.667% (2/30)	0.000260871	3.58	ENSG00000115170;ENSG00000183691	ACVR1;NOG	0% (0/30)	8.73e-05	4.06	NA	NA	3.333% (1/30)	6.33e-05	4.2	ENSG00000183691	NOG	3.333% (1/30)	0.000372905	3.43	ENSG00000114315	HES1
6	7.35	GO:0061053	somite development	The progression of a somite from its initial formation to the mature structure. Somites are mesodermal clusters that are arranged segmentally along the anterior posterior axis of an embryo.	10.345% (9/87)	0.00427722	2.37	ENSG00000069248;ENSG00000073536;ENSG00000101752;ENSG00000106003;ENSG00000128918;ENSG00000136099;ENSG00000148204;ENSG00000167034;ENSG00000183691	NUP133;NLE1;MIB1;LFNG;ALDH1A2;PCDH8;CRB2;NKX3-1;NOG	1.149% (1/87)	0.195375	0.71	NA	NA	0% (0/87)	0.0113415	1.95	NA	NA	1.149% (1/87)	0.00494273	2.31	ENSG00000183691	NOG	0% (0/87)	0.00962326	2.02	NA	NA
6	7.7	GO:0001756	somitogenesis	The formation of mesodermal clusters that are arranged segmentally along the anterior posterior axis of an embryo.	10.145% (7/69)	0.0142263	1.85	NA	NA	0% (0/69)	0.00901792	2.04	NA	NA	0% (0/69)	0.0136102	1.87	NA	NA	0% (0/69)	0.0104899	1.98	NA	NA	0% (0/69)	0.0129559	1.89	NA	NA
6	7.48	GO:0001843	neural tube closure	The last step in the formation of the neural tube, where the paired neural folds are brought together and fuse at the dorsal midline.	14.286% (13/91)	0.00340889	2.47	ENSG00000010361;ENSG00000011143;ENSG00000075275;ENSG00000081479;ENSG00000112655;ENSG00000120254;ENSG00000138002;ENSG00000148926;ENSG00000164442;ENSG00000166145;ENSG00000167642;ENSG00000171863;ENSG00000183691	FUZ;MKS1;CELSR1;LRP2;PTK7;MTHFD1L;IFT172;ADM;CITED2;SPINT1;SPINT2;RPS7;NOG	4.396% (4/91)	0.00689681	2.16	ENSG00000081479;ENSG00000112655;ENSG00000148926;ENSG00000183691	LRP2;PTK7;ADM;NOG	1.099% (1/91)	0.0059607	2.22	ENSG00000112655	PTK7	1.099% (1/91)	0.00117563	2.93	ENSG00000183691	NOG	1.099% (1/91)	0.00501545	2.3	ENSG00000139174	PRICKLE1
6	9.67	GO:0033504	floor plate development	The progression of the floor plate over time from its initial formation until its mature state.	0% (0/11)	0.00681014	2.17	NA	NA	0% (0/11)	0.0291299	1.54	NA	NA	0% (0/11)	0.039148	1.41	NA	NA	0% (0/11)	0.0318183	1.5	NA	NA	0% (0/11)	0.0374775	1.43	NA	NA
6	6.76	GO:0021915	neural tube development	The process whose specific outcome is the progression of the neural tube over time, from its formation to the mature structure. The mature structure of the neural tube exists when the tube has been segmented into the forebrain, midbrain, hindbrain and spinal cord regions. In addition neural crest has budded away from the epithelium.	18.519% (30/162)	0.141767	0.85	NA	NA	4.321% (7/162)	0.0047043	2.33	ENSG00000081479;ENSG00000112655;ENSG00000148926;ENSG00000179029;ENSG00000183691;ENSG00000185650;ENSG00000204852	LRP2;PTK7;ADM;TMEM107;NOG;ZFP36L1;TCTN1	0.617% (1/162)	0.0137763	1.86	NA	NA	1.235% (2/162)	0.0065267	2.19	ENSG00000183691;ENSG00000204852	NOG;TCTN1	1.235% (2/162)	0.0234365	1.63	NA	NA
7	9.22	GO:0051797	regulation of hair follicle development	Any process that modulates the frequency, rate or extent of hair follicle development.	15% (3/20)	0.00651611	2.19	ENSG00000122641;ENSG00000137497;ENSG00000173083	INHBA;NUMA1;HPSE	0% (0/20)	0.0753872	1.12	NA	NA	0% (0/20)	0.0949608	1.02	NA	NA	5% (1/20)	0.0113282	1.95	NA	NA	5% (1/20)	0.0136552	1.86	NA	NA
7	10.51	GO:0051799	negative regulation of hair follicle development	Any process that stops, prevents, or reduces the frequency, rate or extent of hair follicle development.	16.667% (1/6)	0.0192156	1.72	NA	NA	0% (0/6)	0.00307135	2.51	NA	NA	0% (0/6)	0.00362148	2.44	NA	NA	16.667% (1/6)	0.0367717	1.43	NA	NA	16.667% (1/6)	0.0393858	1.4	NA	NA
7	8.67	GO:0031069	hair follicle morphogenesis	The process in which the anatomical structures of the hair follicle are generated and organized.	6.061% (2/33)	0.00540853	2.27	ENSG00000066468;ENSG00000168036	FGFR2;CTNNB1	0% (0/33)	0.0221259	1.66	NA	NA	0% (0/33)	0.042789	1.37	NA	NA	3.03% (1/33)	0.0645735	1.19	NA	NA	0% (0/33)	0.0389359	1.41	NA	NA
7	7.46	GO:0001942	hair follicle development	The process whose specific outcome is the progression of the hair follicle over time, from its formation to the mature structure. A hair follicle is a tube-like opening in the epidermis where the hair shaft develops and into which the sebaceous glands open.	16.495% (16/97)	0.654139	0.18	NA	NA	3.093% (3/97)	0.0158855	1.8	NA	NA	0% (0/97)	0.00854788	2.07	NA	NA	3.093% (3/97)	0.00961565	2.02	ENSG00000122641;ENSG00000135960;ENSG00000164379	INHBA;EDAR;FOXQ1	1.031% (1/97)	0.00585485	2.23	ENSG00000122641	INHBA
7	10.7	GO:0060687	regulation of branching involved in prostate gland morphogenesis	Any process that modulates the rate, frequency, or extent of prostate gland branching, the process in which the branching structure of the prostate gland is generated and organized. A branch is a division or offshoot from a main stem.	0% (0/5)	0.00422128	2.37	NA	NA	0% (0/5)	0.00819038	2.09	NA	NA	0% (0/5)	0.00939356	2.03	NA	NA	0% (0/5)	0.00853992	2.07	NA	NA	0% (0/5)	0.00920851	2.04	NA	NA
7	8.34	GO:0007435	salivary gland morphogenesis	The process in which the anatomical structures of the salivary gland are generated and organized.	14.706% (5/34)	0.152161	0.82	NA	NA	5.882% (2/34)	0.00574702	2.24	ENSG00000099250;ENSG00000158813	NRP1;EDA	0% (0/34)	0.0271762	1.57	NA	NA	2.941% (1/34)	0.0888256	1.05	NA	NA	0% (0/34)	0.0258998	1.59	NA	NA
7	8.9	GO:0060445	branching involved in salivary gland morphogenesis	The process in which the branching structure of the salivary gland is generated and organized.	4.545% (1/22)	0.00799438	2.1	ENSG00000066468	FGFR2	4.545% (1/22)	0.0168855	1.77	NA	NA	0% (0/22)	0.00351853	2.45	NA	NA	0% (0/22)	0.00310766	2.51	NA	NA	0% (0/22)	0.00343353	2.46	NA	NA
7	9.82	GO:0060693	regulation of branching involved in salivary gland morphogenesis	Any process that modulates the rate, frequency, or extent of branching morphogenesis in the salivary gland epithelium.	0% (0/9)	0.00132972	2.88	NA	NA	0% (0/9)	0.00171852	2.76	NA	NA	0% (0/9)	0.00180485	2.74	NA	NA	0% (0/9)	0.00172884	2.76	NA	NA	0% (0/9)	0.0017877	2.75	NA	NA
7	10.51	GO:0060751	branch elongation involved in mammary gland duct branching	The developmental growth process in which a branch of a mammary gland duct elongates.	20% (1/5)	0.022232	1.65	NA	NA	0% (0/5)	0.00629919	2.2	NA	NA	0% (0/5)	0.00718908	2.14	NA	NA	0% (0/5)	0.00654941	2.18	NA	NA	0% (0/5)	0.00704905	2.15	NA	NA
7	9.74	GO:0060600	dichotomous subdivision of an epithelial terminal unit	The process in which an epithelial cord, rod or tube bifurcates at its end.	12.5% (1/8)	0.00601698	2.22	ENSG00000075275	CELSR1	12.5% (1/8)	0.0110652	1.96	NA	NA	0% (0/8)	0.00119352	2.92	NA	NA	0% (0/8)	0.00107338	2.97	NA	NA	0% (0/8)	0.00116881	2.93	NA	NA
7	8.87	GO:0060602	branch elongation of an epithelium	The growth process in which a branch increases in length from its base to its tip.	10% (2/20)	0.000653945	3.18	ENSG00000066468;ENSG00000125686	FGFR2;MED1	0% (0/20)	0.00479886	2.32	NA	NA	0% (0/20)	0.00658751	2.18	NA	NA	0% (0/20)	0.00534908	2.27	NA	NA	5% (1/20)	0.00627744	2.2	ENSG00000164056	SPRY1
7	9.26	GO:0045198	establishment of epithelial cell apical/basal polarity	The specification and formation of the apicobasal polarity of an epithelial cell.	11.765% (2/17)	0.000659218	3.18	ENSG00000109083;ENSG00000112655	IFT20;PTK7	5.882% (1/17)	0.000300419	3.52	ENSG00000112655	PTK7	5.882% (1/17)	0.000379054	3.42	ENSG00000112655	PTK7	0% (0/17)	4.06e-05	4.39	NA	NA	0% (0/17)	4.73e-05	4.33	NA	NA
7	8.18	GO:0001736	establishment of planar polarity	Coordinated organization of groups of cells in the plane of an epithelium, such that they all orient to similar coordinates.	13.158% (5/38)	0.0264544	1.58	NA	NA	2.632% (1/38)	0.0122021	1.91	NA	NA	2.632% (1/38)	0.0240993	1.62	NA	NA	0% (0/38)	0.00556432	2.25	NA	NA	0% (0/38)	0.00847262	2.07	NA	NA
7	8.48	GO:0048730	epidermis morphogenesis	The process in which the anatomical structures of the epidermis are generated and organized. The epidermis is the outer epithelial layer of an animal, it may be a single layer that produces an extracellular material (e.g. the cuticle of arthropods) or a complex stratified squamous epithelium, as in the case of many vertebrate species.	5.405% (2/37)	0.0382473	1.42	NA	NA	0% (0/37)	0.00974509	2.01	NA	NA	0% (0/37)	0.0210757	1.68	NA	NA	2.703% (1/37)	0.0307737	1.51	NA	NA	0% (0/37)	0.0188699	1.72	NA	NA
7	8.78	GO:0060571	morphogenesis of an epithelial fold	The morphogenetic process in which an epithelial sheet bends along a linear axis.	16% (4/25)	0.0146809	1.83	NA	NA	4% (1/25)	0.00624597	2.2	ENSG00000183691	NOG	0% (0/25)	0.0119062	1.92	NA	NA	4% (1/25)	0.00757216	2.12	ENSG00000183691	NOG	0% (0/25)	0.0108767	1.96	NA	NA
7	5.3	GO:0002009	morphogenesis of an epithelium	The process in which the anatomical structures of epithelia are generated and organized. An epithelium consists of closely packed cells arranged in one or more layers, that covers the outer surfaces of the body or lines any internal cavity or tube.	12.897% (65/504)	0.0410153	1.39	NA	NA	2.778% (14/504)	0.141321	0.85	NA	NA	0.397% (2/504)	0.00651593	2.19	ENSG00000081189;ENSG00000112655	MEF2C;PTK7	1.786% (9/504)	0.0415459	1.38	NA	NA	0.992% (5/504)	0.0156066	1.81	NA	NA
8	5.58	GO:0060537	muscle tissue development	The progression of muscle tissue over time, from its initial formation to its mature state. Muscle tissue is a contractile tissue made up of actin and myosin fibers.	13.539% (57/421)	0.033454	1.48	NA	NA	4.038% (17/421)	0.0156365	1.81	NA	NA	0.475% (2/421)	0.00725479	2.14	ENSG00000081189;ENSG00000082293	MEF2C;COL19A1	2.138% (9/421)	0.00747717	2.13	ENSG00000047597;ENSG00000112062;ENSG00000138685;ENSG00000140416;ENSG00000150093;ENSG00000151320;ENSG00000157168;ENSG00000164105;ENSG00000183691	XK;MAPK14;FGF2;TPM1;ITGB1;AKAP6;NRG1;SAP30;NOG	1.425% (6/421)	0.0319493	1.5	NA	NA
8	6.09	GO:0014706	striated muscle tissue development	The process whose specific outcome is the progression of a striated muscle over time, from its formation to the mature structure. Striated muscle contain fibers that are divided by transverse bands into striations, and cardiac and skeletal muscle are types of striated muscle. Skeletal muscle myoblasts fuse to form myotubes and eventually multinucleated muscle fibers. The fusion of cardiac cells i…	10.976% (27/246)	0.0169297	1.77	NA	NA	4.472% (11/246)	0.0396062	1.4	NA	NA	0.407% (1/246)	0.0164165	1.78	NA	NA	2.846% (7/246)	0.039943	1.4	NA	NA	2.033% (5/246)	0.00773982	2.11	ENSG00000081189;ENSG00000133424;ENSG00000139174;ENSG00000150093;ENSG00000151320	MEF2C;LARGE1;PRICKLE1;ITGB1;AKAP6
8	3.58	GO:0009888	tissue development	The process whose specific outcome is the progression of a tissue over time, from its formation to the mature structure.	15.653% (314/2006)	0.122452	0.91	NA	NA	3.938% (79/2006)	0.00488443	2.31	ENSG00000008083;ENSG00000010319;ENSG00000012223;ENSG00000026508;ENSG00000049768;ENSG00000055732;ENSG00000057657;ENSG00000065534;ENSG00000065618;ENSG00000068024;ENSG00000068305;ENSG00000072840;ENSG00000081479;ENSG00000099250;ENSG00000102878;ENSG00000104447;ENSG00000105810;ENSG00000105855;ENSG00000107954;ENSG00000108924;ENSG00000108950;ENSG00000111144;ENSG00000111450;ENSG00000112062;ENSG00000112655…	JARID2;SEMA3G;LTF;CD44;FOXP3;MCOLN3;PRDM1;MYLK;COL17A1;HDAC4;MEF2A;EVC;LRP2;NRP1;HSF4;TRPS1;CDK6;ITGB8;NEURL1;HLF;FAM20A;LTA4H;STX2;MAPK14;PTK7;PDE4D;ACVR1;SOS1;MMP8;ACVR2A;EDN3;VIL1;PALLD;CDKN1C;PPARG;CHI3L1;GRHL1;APLNR;ANXA1;SERPINE2;FLNB;CYP1B1;ARHGAP24;FBN2;CSGALNACT1;CDKN2B;ADM;TAGLN;ARID5B;SLC7A11;AKAP6;APCDD1;TTN;NRG1;EDA;TPPP3;ASGR2;KIF26B;FSTL1;SAP30;DACT2;SEMA6B;ADAM9;CDH2;MYD88;TSPEAR;…	0.249% (5/2006)	0.00541245	2.27	ENSG00000070961;ENSG00000081189;ENSG00000082293;ENSG00000112655;ENSG00000186716	ATP2B1;MEF2C;COL19A1;PTK7;BCR	1.844% (37/2006)	0.023808	1.62	NA	NA	0.748% (15/2006)	0.0369683	1.43	NA	NA
8	4.26	GO:0060429	epithelium development	The process whose specific outcome is the progression of an epithelium over time, from its formation to the mature structure. An epithelium is a tissue that covers the internal or external surfaces of an anatomical structure.	15.931% (195/1224)	0.34684	0.46	NA	NA	3.676% (45/1224)	0.031301	1.5	NA	NA	0.245% (3/1224)	0.029782	1.53	NA	NA	1.797% (22/1224)	0.0238835	1.62	NA	NA	0.572% (7/1224)	0.00944076	2.02	ENSG00000081189;ENSG00000114315;ENSG00000122641;ENSG00000129757;ENSG00000139174;ENSG00000150093;ENSG00000164056	MEF2C;HES1;INHBA;CDKN1C;PRICKLE1;ITGB1;SPRY1
8	6.13	GO:0021700	developmental maturation	A developmental process, independent of morphogenetic (shape) change, that is required for an anatomical structure, cell or cellular component to attain its fully functional state.	16.035% (55/343)	0.0539792	1.27	NA	NA	3.499% (12/343)	0.0133021	1.88	NA	NA	0% (0/343)	0.00472286	2.33	NA	NA	1.749% (6/343)	0.00782437	2.11	ENSG00000012223;ENSG00000091129;ENSG00000109906;ENSG00000163251;ENSG00000186417;ENSG00000196159	LTF;NRCAM;ZBTB16;FZD5;GLDN;FAT4	1.458% (5/343)	0.00825489	2.08	ENSG00000012223;ENSG00000091129;ENSG00000114315;ENSG00000129757;ENSG00000186417	LTF;NRCAM;HES1;CDKN1C;GLDN
8	1.87	GO:0032502	developmental process	A biological process whose specific outcome is the progression of an integrated living unit: an anatomical structure (which may be a subcellular structure, cell, tissue, or organ), or organism over time from an initial condition to a later condition.	16.113% (1038/6442)	0.00512167	2.29	ENSG00000002745;ENSG00000004487;ENSG00000004939;ENSG00000005022;ENSG00000005108;ENSG00000005194;ENSG00000005513;ENSG00000006125;ENSG00000006459;ENSG00000006607;ENSG00000006712;ENSG00000006740;ENSG00000007372;ENSG00000007516;ENSG00000007944;ENSG00000008083;ENSG00000008438;ENSG00000009307;ENSG00000009694;ENSG00000009709;ENSG00000010361;ENSG00000010671;ENSG00000011143;ENSG00000011198;ENSG00000011201…	WNT16;KDM1A;SLC4A1;SLC25A5;THSD7A;CIAPIN1;SOX8;AP2B1;KDM7A;FARP2;PAF1;ARHGAP44;PAX6;BAIAP3;MYLIP;JARID2;PGLYRP1;CSDE1;TENM1;PAX7;FUZ;BTK;MKS1;ABHD5;ANOS1;PTBP1;ANLN;DCN;LTF;PSMC4;CD74;ZRANB1;ZFP64;STRAP;PLEKHO1;NR1H3;NCAPH2;VIM;CD44;TBPL1;NUP160;SLC4A7;APBA2;FLT4;NSUN2;VCAN;CTNS;TG;ADAM28;JADE2;ADRB1;GPM6B;XK;COL9A2;NEDD4L;FSTL4;FOXN3;GALC;TAB2;EIF2AK2;MCOLN3;RC3H2;PRDM1;PITHD1;SEC61A1;RASGRF1;AT…	3.896% (251/6442)	0.0307791	1.51	NA	NA	0.186% (12/6442)	0.17737	0.75	NA	NA	2.328% (150/6442)	0.00636492	2.2	ENSG00000006125;ENSG00000009307;ENSG00000011201;ENSG00000011426;ENSG00000012223;ENSG00000028839;ENSG00000034053;ENSG00000047597;ENSG00000049759;ENSG00000051341;ENSG00000055208;ENSG00000055732;ENSG00000056586;ENSG00000065618;ENSG00000065883;ENSG00000066279;ENSG00000067066;ENSG00000072274;ENSG00000072840;ENSG00000074966;ENSG00000078124;ENSG00000079215;ENSG00000082014;ENSG00000088986;ENSG00000089041…	AP2B1;CSDE1;ANOS1;ANLN;LTF;TBPL1;APBA2;XK;NEDD4L;POLQ;TAB2;MCOLN3;RC3H2;COL17A1;CDK13;ASPM;SP100;TFRC;EVC;TXK;ACER3;SLC1A3;SMARCD3;DYNLL1;P2RX7;NRCAM;MAP3K20;RPGRIP1;SRPK1;RBFOX2;RBX1;E2F1;ZDHHC2;TRPS1;EZH2;FAM20A;MAP2K6;ZBTB16;EXPH5;LTA4H;CUX2;SLC26A8;MAPK14;RHAG;WASF1;SNX3;CDH6;KAT2B;TTL;LEPR;GADD45A;PRDX1;MMP8;PGF;CD274;INHBA;CIT;NRN1;RAP2A;YWHAH;ASH2L;GDF15;TOP2A;SERPINF1;BEX1;LDHA;PIWIL4;ARH…	0.699% (45/6442)	0.0148655	1.83	NA	NA
8	8.41	GO:0031128	developmental induction	A developmental process involving two tissues in which one tissue (the inducer) produces a signal that directs cell fate commitment of cells in the second tissue (the responder).	14.706% (5/34)	0.494428	0.31	NA	NA	0% (0/34)	0.00113382	2.95	NA	NA	0% (0/34)	0.00266901	2.57	NA	NA	5.882% (2/34)	0.0139197	1.86	NA	NA	2.941% (1/34)	0.00736597	2.13	ENSG00000164056	SPRY1
8	8.3	GO:0060324	face development	The biological process whose specific outcome is the progression of a face from an initial condition to its mature state. The face is the ventral division of the head.	9.434% (5/53)	0.00412478	2.38	ENSG00000107372;ENSG00000128918;ENSG00000150347;ENSG00000183691;ENSG00000198363	ZFAND5;ALDH1A2;ARID5B;NOG;ASPH	5.66% (3/53)	0.0276411	1.56	NA	NA	0% (0/53)	0.0370779	1.43	NA	NA	3.774% (2/53)	0.0221059	1.66	NA	NA	1.887% (1/53)	0.0660842	1.18	NA	NA
8	4.82	GO:0060322	head development	The biological process whose specific outcome is the progression of a head from an initial condition to its mature state. The head is the anterior-most division of the body.	15.581% (122/783)	0.0553326	1.26	NA	NA	4.853% (38/783)	0.00603283	2.22	ENSG00000018625;ENSG00000081479;ENSG00000091129;ENSG00000099250;ENSG00000100320;ENSG00000102038;ENSG00000105810;ENSG00000108576;ENSG00000115904;ENSG00000134333;ENSG00000134909;ENSG00000135919;ENSG00000138772;ENSG00000144290;ENSG00000144554;ENSG00000145545;ENSG00000150347;ENSG00000151012;ENSG00000155511;ENSG00000157193;ENSG00000162946;ENSG00000163492;ENSG00000165704;ENSG00000165795;ENSG00000166165…	ATP1A2;LRP2;NRCAM;NRP1;RBFOX2;SMARCA1;CDK6;SLC6A4;SOS1;LDHA;ARHGAP32;SERPINE2;ANXA3;SLC4A10;FANCD2;SRD5A1;ARID5B;SLC7A11;GRIA1;LRP8;DISC1;CCDC141;HPRT1;NDRG2;CKB;SEMA6B;CDH2;KCNA2;GATA2;NOG;PCDH9;MATCAP1;FAT4;PGAP1;ASPH;TCTN1;PLXNA4;NEFL	0.511% (4/783)	0.0032818	2.48	ENSG00000114450;ENSG00000142798;ENSG00000184226;ENSG00000186716	GNB4;HSPG2;PCDH9;BCR	3.193% (25/783)	0.00303459	2.52	ENSG00000066279;ENSG00000088986;ENSG00000091129;ENSG00000100320;ENSG00000101412;ENSG00000106462;ENSG00000122641;ENSG00000128245;ENSG00000134333;ENSG00000134909;ENSG00000137210;ENSG00000138685;ENSG00000138772;ENSG00000144290;ENSG00000145545;ENSG00000149557;ENSG00000150093;ENSG00000151012;ENSG00000163568;ENSG00000166171;ENSG00000183691;ENSG00000196159;ENSG00000198363;ENSG00000204852;ENSG00000250722	ASPM;DYNLL1;NRCAM;RBFOX2;E2F1;EZH2;INHBA;YWHAH;LDHA;ARHGAP32;TMEM14B;FGF2;ANXA3;SLC4A10;SRD5A1;FEZ1;ITGB1;SLC7A11;AIM2;DPCD;NOG;FAT4;ASPH;TCTN1;SELENOP	1.022% (8/783)	0.00501482	2.3	ENSG00000091129;ENSG00000114315;ENSG00000122641;ENSG00000133424;ENSG00000134909;ENSG00000139174;ENSG00000150093;ENSG00000184226	NRCAM;HES1;INHBA;LARGE1;ARHGAP32;PRICKLE1;ITGB1;PCDH9
8	7.48	GO:0060021	roof of mouth development	The biological process whose specific outcome is the progression of the roof of the mouth from an initial condition to its mature state. This process begins with the formation of the structure and ends with the mature structure. The roof of the mouth is the partition that separates the nasal and oral cavities.	18.478% (17/92)	0.0132266	1.88	NA	NA	6.522% (6/92)	0.00596896	2.22	ENSG00000105855;ENSG00000115904;ENSG00000150347;ENSG00000162496;ENSG00000179029;ENSG00000198363	ITGB8;SOS1;ARID5B;DHRS3;TMEM107;ASPH	0% (0/92)	0.00123833	2.91	NA	NA	3.261% (3/92)	0.00213759	2.67	ENSG00000122641;ENSG00000162496;ENSG00000198363	INHBA;DHRS3;ASPH	2.174% (2/92)	0.00439474	2.36	ENSG00000119042;ENSG00000122641	SATB2;INHBA
8	6.66	GO:0031099	regeneration	The regrowth of a lost or destroyed body part, such as an organ or tissue. This process may occur via renewal, repair, and/or growth alone (i.e. increase in size or mass).	14.925% (30/201)	0.00522908	2.28	ENSG00000074966;ENSG00000096968;ENSG00000102572;ENSG00000103257;ENSG00000105426;ENSG00000106462;ENSG00000114030;ENSG00000122025;ENSG00000125686;ENSG00000126861;ENSG00000131095;ENSG00000132170;ENSG00000135046;ENSG00000136634;ENSG00000136999;ENSG00000137261;ENSG00000137996;ENSG00000138772;ENSG00000142798;ENSG00000143418;ENSG00000143952;ENSG00000145386;ENSG00000148926;ENSG00000170312;ENSG00000183762…	TXK;JAK2;STK24;SLC7A5;PTPRS;EZH2;KPNA1;FLT3;MED1;OMG;GFAP;PPARG;ANXA1;IL10;CCN3;KIAA0319;RTCA;ANXA3;HSPG2;CERS2;VPS54;CCNA2;ADM;CDK1;KREMEN1;APOD;INPP5F;DMD;DHFR;NEFL	4.975% (10/201)	0.00413212	2.38	ENSG00000126861;ENSG00000132170;ENSG00000134247;ENSG00000135046;ENSG00000137996;ENSG00000138772;ENSG00000148926;ENSG00000171840;ENSG00000183762;ENSG00000277586	OMG;PPARG;PTGFRN;ANXA1;RTCA;ANXA3;ADM;NINJ2;KREMEN1;NEFL	0.498% (1/201)	0.225347	0.65	NA	NA	2.488% (5/201)	0.222837	0.65	NA	NA	1.493% (3/201)	0.0249662	1.6	NA	NA
8	5.02	GO:0061061	muscle structure development	The progression of a muscle structure over time, from its formation to its mature state. Muscle structures are contractile cells, tissues or organs that are found in multicellular organisms.	14.897% (101/678)	0.0307491	1.51	NA	NA	5.015% (34/678)	0.00214173	2.67	ENSG00000023902;ENSG00000065534;ENSG00000068024;ENSG00000068305;ENSG00000072840;ENSG00000081479;ENSG00000082014;ENSG00000105048;ENSG00000107954;ENSG00000108924;ENSG00000112062;ENSG00000113520;ENSG00000115170;ENSG00000130513;ENSG00000134247;ENSG00000134817;ENSG00000136068;ENSG00000145362;ENSG00000148926;ENSG00000149591;ENSG00000150347;ENSG00000151320;ENSG00000155657;ENSG00000157168;ENSG00000162909…	PLEKHO1;MYLK;HDAC4;MEF2A;EVC;LRP2;SMARCD3;TNNT1;NEURL1;HLF;MAPK14;IL4;ACVR1;GDF15;PTGFRN;APLNR;FLNB;ANK2;ADM;TAGLN;ARID5B;AKAP6;TTN;NRG1;CAPN2;SAP30;CDH2;CACNB4;NOG;ZFP36L1;COL14A1;LAMA2;ALPK2;TIFAB	0.442% (3/678)	0.0487333	1.31	NA	NA	2.212% (15/678)	0.000390989	3.41	ENSG00000047597;ENSG00000072840;ENSG00000082014;ENSG00000106462;ENSG00000112062;ENSG00000130513;ENSG00000140416;ENSG00000141622;ENSG00000150093;ENSG00000151320;ENSG00000157168;ENSG00000157404;ENSG00000164105;ENSG00000182389;ENSG00000183691	XK;EVC;SMARCD3;EZH2;MAPK14;GDF15;TPM1;ARK2C;ITGB1;AKAP6;NRG1;KIT;SAP30;CACNB4;NOG	1.18% (8/678)	0.00256692	2.59	ENSG00000081189;ENSG00000082293;ENSG00000114315;ENSG00000133424;ENSG00000139174;ENSG00000141622;ENSG00000150093;ENSG00000151320	MEF2C;COL19A1;HES1;LARGE1;PRICKLE1;ARK2C;ITGB1;AKAP6
8	7.43	GO:0030239	myofibril assembly	Formation of myofibrils, the repeating units of striated muscle.	8.824% (6/68)	0.000974103	3.01	ENSG00000068305;ENSG00000071127;ENSG00000105048;ENSG00000124006;ENSG00000150093;ENSG00000155657	MEF2A;WDR1;TNNT1;OBSL1;ITGB1;TTN	4.412% (3/68)	0.0237724	1.62	NA	NA	1.471% (1/68)	0.0182502	1.74	NA	NA	2.941% (2/68)	0.0164217	1.78	NA	NA	1.471% (1/68)	0.0154928	1.81	NA	NA
8	8.84	GO:0032288	myelin assembly	The process in which the wraps of cell membrane that constitute myelin are laid down around an axon in the central or peripheral nervous system.	25% (6/24)	0.00356229	2.45	ENSG00000100697;ENSG00000109099;ENSG00000132470;ENSG00000137462;ENSG00000145362;ENSG00000149256	DICER1;PMP22;ITGB4;TLR2;ANK2;TENM4	4.167% (1/24)	0.000714549	3.15	ENSG00000145362	ANK2	0% (0/24)	0.000942636	3.03	NA	NA	0% (0/24)	0.000771768	3.11	NA	NA	0% (0/24)	0.000908488	3.04	NA	NA
8	4.86	GO:0032989	cellular anatomical entity morphogenesis	The process in which a cellular entity is generated and organized. A cellular entity has granularity above the level of a protein complex but below that of an anatomical system.	15.837% (124/783)	0.0471241	1.33	NA	NA	5.109% (40/783)	0.00212558	2.67	ENSG00000010319;ENSG00000011201;ENSG00000023902;ENSG00000026508;ENSG00000068305;ENSG00000081479;ENSG00000085733;ENSG00000091129;ENSG00000099250;ENSG00000100320;ENSG00000103528;ENSG00000105048;ENSG00000112655;ENSG00000115904;ENSG00000118515;ENSG00000124205;ENSG00000127831;ENSG00000129116;ENSG00000134909;ENSG00000136854;ENSG00000145362;ENSG00000150625;ENSG00000155657;ENSG00000157193;ENSG00000162946…	SEMA3G;ANOS1;PLEKHO1;CD44;MEF2A;LRP2;CTTN;NRCAM;NRP1;RBFOX2;SYT17;TNNT1;PTK7;SOS1;SGK1;EDN3;VIL1;PALLD;ARHGAP32;STXBP1;ANK2;GPM6A;TTN;LRP8;DISC1;HPRT1;PRTG;SEMA6B;CTNND2;CDH2;EMB;BAIAP2;SLITRK4;NOG;LAMA2;DNM3;TCTN1;ITGA1;PLXNA4;NEFL	0.383% (3/783)	0.00213979	2.67	ENSG00000112655;ENSG00000128872;ENSG00000198399	PTK7;TMOD2;ITSN2	2.937% (23/783)	0.0022263	2.65	ENSG00000011201;ENSG00000028839;ENSG00000047597;ENSG00000049759;ENSG00000091129;ENSG00000100320;ENSG00000111249;ENSG00000112290;ENSG00000114999;ENSG00000124785;ENSG00000125249;ENSG00000128245;ENSG00000134909;ENSG00000137812;ENSG00000140416;ENSG00000141622;ENSG00000149557;ENSG00000150093;ENSG00000157404;ENSG00000169439;ENSG00000173744;ENSG00000183691;ENSG00000204852	ANOS1;TBPL1;XK;NEDD4L;NRCAM;RBFOX2;CUX2;WASF1;TTL;NRN1;RAP2A;YWHAH;ARHGAP32;KNL1;TPM1;ARK2C;FEZ1;ITGB1;KIT;SDC2;AGFG1;NOG;TCTN1	1.149% (9/783)	0.00219728	2.66	ENSG00000077327;ENSG00000091129;ENSG00000103528;ENSG00000125249;ENSG00000134909;ENSG00000139174;ENSG00000141622;ENSG00000150093;ENSG00000184349	SPAG6;NRCAM;SYT17;RAP2A;ARHGAP32;PRICKLE1;ARK2C;ITGB1;EFNA5
8	7.61	GO:0000768	syncytium formation by plasma membrane fusion	The formation of a syncytium, a mass of cytoplasm containing several nuclei enclosed within a single plasma membrane, by the fusion of the plasma membranes of two or more individual cells.	19.355% (12/62)	0.00911596	2.04	ENSG00000023902;ENSG00000077238;ENSG00000112062;ENSG00000113520;ENSG00000130513;ENSG00000134072;ENSG00000143494;ENSG00000150093;ENSG00000150760;ENSG00000162909;ENSG00000164935;ENSG00000168615	PLEKHO1;IL4R;MAPK14;IL4;GDF15;CAMK1;VASH2;ITGB1;DOCK1;CAPN2;DCSTAMP;ADAM9	12.903% (8/62)	0.0164535	1.78	NA	NA	0% (0/62)	0.0101704	1.99	NA	NA	6.452% (4/62)	0.00363891	2.44	ENSG00000112062;ENSG00000130513;ENSG00000150093;ENSG00000168615	MAPK14;GDF15;ITGB1;ADAM9	1.613% (1/62)	0.0217212	1.66	NA	NA
8	7.56	GO:0006949	syncytium formation	The formation of a syncytium, a mass of cytoplasm containing several nuclei enclosed within a single plasma membrane. Syncytia are normally derived from single cells that fuse or fail to complete cell division.	19.697% (13/66)	0.233707	0.63	NA	NA	12.121% (8/66)	0.0112025	1.95	NA	NA	0% (0/66)	0.00655616	2.18	NA	NA	6.061% (4/66)	0.343831	0.46	NA	NA	1.515% (1/66)	0.0139722	1.85	NA	NA
8	4.69	GO:0000902	cell morphogenesis	The developmental process in which the size or shape of a cell is generated and organized.	16.345% (161/985)	6.77e-07	6.17	ENSG00000006740;ENSG00000007372;ENSG00000011201;ENSG00000019995;ENSG00000023902;ENSG00000026508;ENSG00000043143;ENSG00000047597;ENSG00000049759;ENSG00000053108;ENSG00000066032;ENSG00000066468;ENSG00000067606;ENSG00000067900;ENSG00000068305;ENSG00000069869;ENSG00000071127;ENSG00000073712;ENSG00000073921;ENSG00000075856;ENSG00000075884;ENSG00000077254;ENSG00000078618;ENSG00000079215;ENSG00000081479…	ARHGAP44;PAX6;ANOS1;ZRANB1;PLEKHO1;CD44;JADE2;XK;NEDD4L;FSTL4;CTNNA2;FGFR2;PRKCZ;ROCK1;MEF2A;NEDD4;WDR1;FERMT2;PICALM;SART3;ARHGAP15;USP33;NRDC;SLC1A3;LRP2;GSK3B;RAB10;CTTN;P2RX7;SLC23A2;MUL1;EFNB1;NRCAM;WHRN;RBFOX2;UPK3A;DICER1;ADNP;MYL12A;EEF2K;ARHGEF18;PTPRS;MEGF8;CDH23;PPP3CB;WNT3;EIF4G2;SLC11A2;CUX2;MAPK14;WASF1;PTK7;DBN1;BCL6;ECT2;RPL24;TTL;ITGB6;RTN4;FN1;SOS1;RHOU;STMN1;SGK1;MYL12B;OBSL1;P…	4.873% (48/985)	1.39e-06	5.86	ENSG00000010319;ENSG00000011201;ENSG00000023902;ENSG00000026508;ENSG00000068305;ENSG00000079215;ENSG00000081479;ENSG00000085733;ENSG00000091129;ENSG00000099250;ENSG00000100320;ENSG00000100473;ENSG00000103528;ENSG00000112062;ENSG00000112655;ENSG00000115904;ENSG00000118515;ENSG00000124205;ENSG00000127831;ENSG00000129116;ENSG00000132906;ENSG00000134909;ENSG00000135046;ENSG00000136068;ENSG00000136854…	SEMA3G;ANOS1;PLEKHO1;CD44;MEF2A;SLC1A3;LRP2;CTTN;NRCAM;NRP1;RBFOX2;COCH;SYT17;MAPK14;PTK7;SOS1;SGK1;EDN3;VIL1;PALLD;CASP9;ARHGAP32;ANXA1;FLNB;STXBP1;MYO10;GPM6A;LRP8;DISC1;CDC42EP3;DACT2;HPRT1;PRTG;SEMA6B;CTNND2;CDH2;EMB;CABP4;BAIAP2;ZNF135;SLITRK4;NOG;LAMA2;DNM3;TCTN1;ITGA1;PLXNA4;NEFL	0.305% (3/985)	1.25e-07	6.9	ENSG00000081189;ENSG00000112655;ENSG00000198399	MEF2C;PTK7;ITSN2	2.741% (27/985)	1.12e-07	6.95	ENSG00000011201;ENSG00000047597;ENSG00000049759;ENSG00000079215;ENSG00000089041;ENSG00000091129;ENSG00000100320;ENSG00000111249;ENSG00000112062;ENSG00000112290;ENSG00000113361;ENSG00000114999;ENSG00000124785;ENSG00000125249;ENSG00000128245;ENSG00000134909;ENSG00000140416;ENSG00000141622;ENSG00000145555;ENSG00000149557;ENSG00000150093;ENSG00000157404;ENSG00000163171;ENSG00000169439;ENSG00000176293…	ANOS1;XK;NEDD4L;SLC1A3;P2RX7;NRCAM;RBFOX2;CUX2;MAPK14;WASF1;CDH6;TTL;NRN1;RAP2A;YWHAH;ARHGAP32;TPM1;ARK2C;MYO10;FEZ1;ITGB1;KIT;CDC42EP3;SDC2;ZNF135;NOG;TCTN1	1.32% (13/985)	1.57e-05	4.8	ENSG00000077327;ENSG00000081189;ENSG00000091129;ENSG00000103528;ENSG00000114315;ENSG00000116574;ENSG00000125249;ENSG00000134909;ENSG00000139174;ENSG00000141622;ENSG00000150093;ENSG00000176293;ENSG00000184349	SPAG6;MEF2C;NRCAM;SYT17;HES1;RHOU;RAP2A;ARHGAP32;PRICKLE1;ARK2C;ITGB1;ZNF135;EFNA5
8	4.41	GO:0048646	anatomical structure formation involved in morphogenesis	The developmental process pertaining to the initial formation of an anatomical structure from unspecified parts. This process begins with the specific processes that contribute to the appearance of the discrete structure and ends when the structural rudiment is recognizable. An anatomical structure is any biological entity that occupies space and is distinguished from its surroundings. Anatomical…	15.696% (186/1185)	1.06e-07	6.97	ENSG00000002745;ENSG00000005108;ENSG00000005513;ENSG00000006712;ENSG00000007372;ENSG00000010361;ENSG00000011143;ENSG00000011465;ENSG00000023902;ENSG00000028839;ENSG00000037280;ENSG00000058668;ENSG00000060237;ENSG00000064989;ENSG00000066056;ENSG00000066468;ENSG00000067066;ENSG00000067900;ENSG00000068305;ENSG00000071127;ENSG00000072134;ENSG00000073536;ENSG00000075275;ENSG00000077238;ENSG00000078098…	WNT16;THSD7A;SOX8;PAF1;PAX6;FUZ;MKS1;DCN;PLEKHO1;TBPL1;FLT4;ATP2B4;WNK1;CALCRL;TIE1;FGFR2;SP100;ROCK1;MEF2A;WDR1;EPN2;NLE1;CELSR1;IL4R;FAP;LRP2;SMARCD3;NRCAM;WHRN;HMOX1;DICER1;JAG1;MIB1;TNFSF13B;RGCC;STK3;TNNT1;ITGB8;LFNG;C1GALT1;TGFBR1;PPP3CB;WNT3;FAM20A;PMP22;FBXW7;ELK3;SASH1;MAPK14;ADGRG6;PTK7;IL4;BCL6;PDCD10;NCL;SF3B6;ACVR1;ITGB6;SPTBN1;RTN4;FN1;FHL2;EPAS1;NFE2L2;HDAC1;LEPR;GADD45A;MMP8;TNFAI…	4.895% (58/1185)	5.01e-07	6.3	ENSG00000005108;ENSG00000010327;ENSG00000023902;ENSG00000067066;ENSG00000068305;ENSG00000078098;ENSG00000081479;ENSG00000082014;ENSG00000091129;ENSG00000099250;ENSG00000102524;ENSG00000105048;ENSG00000105855;ENSG00000108950;ENSG00000111145;ENSG00000111961;ENSG00000112062;ENSG00000112414;ENSG00000112655;ENSG00000113520;ENSG00000115170;ENSG00000116044;ENSG00000116717;ENSG00000118113;ENSG00000120156…	THSD7A;STAB1;PLEKHO1;SP100;MEF2A;FAP;LRP2;SMARCD3;NRCAM;NRP1;TNFSF13B;TNNT1;ITGB8;FAM20A;ELK3;SASH1;MAPK14;ADGRG6;PTK7;IL4;ACVR1;NFE2L2;GADD45A;MMP8;TEK;CCR2;GDF15;PPARG;CASP9;CHI3L1;PTGFRN;APLNR;ANXA1;CD36;CYP1B1;ARHGAP24;ANXA3;FBN2;ANK2;ADM;GPR15;ANGPT1;TTN;LRP8;EDA;JAK1;KIF26B;CAPN2;PF4;CAMP;DCSTAMP;ADAM9;MINAR1;GATA2;CCR3;NOG;TCTN1;TIFAB	0.338% (4/1185)	5.83e-08	7.23	ENSG00000081189;ENSG00000112655;ENSG00000128872;ENSG00000142798	MEF2C;PTK7;TMOD2;HSPG2	2.869% (34/1185)	3.27e-07	6.49	ENSG00000028839;ENSG00000067066;ENSG00000082014;ENSG00000091129;ENSG00000108950;ENSG00000112062;ENSG00000116678;ENSG00000116717;ENSG00000118113;ENSG00000119630;ENSG00000122641;ENSG00000130513;ENSG00000132386;ENSG00000135218;ENSG00000135960;ENSG00000136634;ENSG00000137812;ENSG00000138685;ENSG00000138772;ENSG00000140416;ENSG00000150093;ENSG00000152270;ENSG00000154734;ENSG00000161381;ENSG00000162434…	TBPL1;SP100;SMARCD3;NRCAM;FAM20A;MAPK14;LEPR;GADD45A;MMP8;PGF;INHBA;GDF15;SERPINF1;CD36;EDAR;IL10;KNL1;FGF2;ANXA3;TPM1;ITGB1;PDE3B;ADAMTS1;PLXDC1;JAK1;FZD5;CAMP;TMIGD2;ADAM9;C3AR1;AGFG1;CCR3;NOG;TCTN1	0.928% (11/1185)	1.89e-09	8.72	ENSG00000081189;ENSG00000091129;ENSG00000114315;ENSG00000118113;ENSG00000122641;ENSG00000133424;ENSG00000139174;ENSG00000150093;ENSG00000164047;ENSG00000164056;ENSG00000172071	MEF2C;NRCAM;HES1;MMP8;INHBA;LARGE1;PRICKLE1;ITGB1;CAMP;SPRY1;EIF2AK3
8	9.09	GO:0060033	anatomical structure regression	The developmental process in which an anatomical stucture is destroyed as a part of its normal progression.	6.25% (1/16)	0.00356578	2.45	ENSG00000174807	CD248	0% (0/16)	0.0193268	1.71	NA	NA	0% (0/16)	0.0272052	1.57	NA	NA	0% (0/16)	0.0215454	1.67	NA	NA	6.25% (1/16)	0.0259553	1.59	NA	NA
9	7.52	GO:0045666	positive regulation of neuron differentiation	Any process that activates or increases the frequency, rate or extent of neuron differentiation.	13.043% (12/92)	0.00264021	2.58	ENSG00000007372;ENSG00000066135;ENSG00000091129;ENSG00000108061;ENSG00000113916;ENSG00000114346;ENSG00000120833;ENSG00000143869;ENSG00000179348;ENSG00000196628;ENSG00000198947;ENSG00000214078	PAX6;KDM4A;NRCAM;SHOC2;BCL6;ECT2;SOCS2;GDF7;GATA2;TCF4;DMD;CPNE1	3.261% (3/92)	0.00724829	2.14	ENSG00000091129;ENSG00000120833;ENSG00000179348	NRCAM;SOCS2;GATA2	1.087% (1/92)	0.0114133	1.94	NA	NA	2.174% (2/92)	0.0100032	2	NA	NA	2.174% (2/92)	0.0182169	1.74	NA	NA
9	6.61	GO:0045664	regulation of neuron differentiation	Any process that modulates the frequency, rate or extent of neuron differentiation.	17.436% (34/195)	0.667308	0.18	NA	NA	2.051% (4/195)	0.0172126	1.76	NA	NA	0.513% (1/195)	0.00107394	2.97	ENSG00000081189	MEF2C	2.564% (5/195)	0.0027182	2.57	ENSG00000066279;ENSG00000091129;ENSG00000128245;ENSG00000138685;ENSG00000150093	ASPM;NRCAM;YWHAH;FGF2;ITGB1	2.564% (5/195)	0.0061861	2.21	ENSG00000081189;ENSG00000091129;ENSG00000114315;ENSG00000134986;ENSG00000150093	MEF2C;NRCAM;HES1;NREP;ITGB1
9	8.2	GO:0045687	positive regulation of glial cell differentiation	Any process that activates or increases the frequency, rate or extent of glia cell differentiation.	19.565% (9/46)	0.0297961	1.53	NA	NA	4.348% (2/46)	0.00622328	2.21	ENSG00000132170;ENSG00000135919	PPARG;SERPINE2	0% (0/46)	0.00172868	2.76	NA	NA	0% (0/46)	0.00101945	2.99	NA	NA	2.174% (1/46)	0.00430378	2.37	ENSG00000114315	HES1
9	6.86	GO:0050768	negative regulation of neurogenesis	Any process that stops, prevents, or reduces the frequency, rate or extent of neurogenesis, the generation of cells within the nervous system.	17.007% (25/147)	0.0177738	1.75	NA	NA	6.122% (9/147)	0.000501872	3.3	ENSG00000010319;ENSG00000099250;ENSG00000130164;ENSG00000146122;ENSG00000147883;ENSG00000166450;ENSG00000167680;ENSG00000179348;ENSG00000183691	SEMA3G;NRP1;LDLR;DAAM2;CDKN2B;PRTG;SEMA6B;GATA2;NOG	0% (0/147)	0.00017879	3.75	NA	NA	2.041% (3/147)	0.00034061	3.47	ENSG00000128245;ENSG00000147883;ENSG00000183691	YWHAH;CDKN2B;NOG	0.68% (1/147)	0.000328122	3.48	ENSG00000114315	HES1
9	8.43	GO:0045616	regulation of keratinocyte differentiation	Any process that modulates the frequency, rate or extent of keratinocyte differentiation.	28.947% (11/38)	0.383553	0.42	NA	NA	5.263% (2/38)	0.0165385	1.78	NA	NA	0% (0/38)	0.00956086	2.02	NA	NA	2.632% (1/38)	0.018898	1.72	NA	NA	0% (0/38)	0.00897373	2.05	NA	NA
9	7.77	GO:0030858	positive regulation of epithelial cell differentiation	Any process that activates or increases the frequency, rate or extent of epithelial cell differentiation.	10.938% (7/64)	0.00668916	2.17	ENSG00000007372;ENSG00000124151;ENSG00000125686;ENSG00000137497;ENSG00000147883;ENSG00000168036;ENSG00000179593	PAX6;NCOA3;MED1;NUMA1;CDKN2B;CTNNB1;ALOX15B	1.562% (1/64)	0.00604838	2.22	ENSG00000147883	CDKN2B	0% (0/64)	0.0119785	1.92	NA	NA	3.125% (2/64)	0.0162895	1.79	NA	NA	0% (0/64)	0.0108762	1.96	NA	NA
9	6.76	GO:0030856	regulation of epithelial cell differentiation	Any process that modulates the frequency, rate or extent of epithelial cell differentiation.	15.385% (24/156)	0.223844	0.65	NA	NA	3.205% (5/156)	0.0774095	1.11	NA	NA	0% (0/156)	0.0233633	1.63	NA	NA	3.205% (5/156)	0.00134007	2.87	ENSG00000106462;ENSG00000138685;ENSG00000147883;ENSG00000196159;ENSG00000196581	EZH2;FGF2;CDKN2B;FAT4;AJAP1	1.923% (3/156)	0.0542312	1.27	NA	NA
9	8.9	GO:0032332	positive regulation of chondrocyte differentiation	Any process that activates or increases the frequency, rate or extent of chondrocyte differentiation.	5% (1/20)	0.00206529	2.69	ENSG00000109906	ZBTB16	0% (0/20)	0.00605442	2.22	NA	NA	0% (0/20)	0.0105325	1.98	NA	NA	5% (1/20)	0.0263765	1.58	NA	NA	0% (0/20)	0.00974836	2.01	NA	NA
9	7.89	GO:0032330	regulation of chondrocyte differentiation	Any process that modulates the frequency, rate or extent of chondrocyte differentiation.	13.208% (7/53)	0.1199	0.92	NA	NA	1.887% (1/53)	0.030957	1.51	NA	NA	0% (0/53)	0.0030245	2.52	NA	NA	3.774% (2/53)	0.00917493	2.04	ENSG00000104447;ENSG00000109906	TRPS1;ZBTB16	0% (0/53)	0.0219352	1.66	NA	NA
9	8.48	GO:0010719	negative regulation of epithelial to mesenchymal transition	Any process that decreases the rate, frequency, or extent of epithelial to mesenchymal transition. Epithelial to mesenchymal transition where an epithelial cell loses apical/basolateral polarity, severs intercellular adhesive junctions, degrades basement membrane components and becomes a migratory mesenchymal cell.	5.882% (2/34)	0.00763221	2.12	ENSG00000010361;ENSG00000183691	FUZ;NOG	2.941% (1/34)	0.0585087	1.23	NA	NA	0% (0/34)	0.101023	1	NA	NA	2.941% (1/34)	0.0692507	1.16	NA	NA	2.941% (1/34)	0.147623	0.83	NA	NA
9	7.83	GO:0010718	positive regulation of epithelial to mesenchymal transition	Any process that increases the rate, frequency, or extent of epithelial to mesenchymal transition. Epithelial to mesenchymal transition is where an epithelial cell loses apical/basolateral polarity, severs intercellular adhesive junctions, degrades basement membrane components and becomes a migratory mesenchymal cell.	18.182% (10/55)	0.110209	0.96	NA	NA	1.818% (1/55)	0.00609215	2.22	ENSG00000115170	ACVR1	0% (0/55)	0.00678791	2.17	NA	NA	1.818% (1/55)	0.00814458	2.09	ENSG00000106462	EZH2	0% (0/55)	0.00590031	2.23	NA	NA
9	8.28	GO:0045663	positive regulation of myoblast differentiation	Any process that activates or increases the frequency, rate or extent of myoblast differentiation. A myoblast is a mononucleate cell type that, by fusion with other myoblasts, gives rise to the myotubes that eventually develop into skeletal muscle fibers.	13.636% (6/44)	0.00302446	2.52	ENSG00000082014;ENSG00000099956;ENSG00000108604;ENSG00000112062;ENSG00000158156;ENSG00000172977	SMARCD3;SMARCB1;SMARCD2;MAPK14;XKR8;KAT5	4.545% (2/44)	0.00718035	2.14	ENSG00000082014;ENSG00000112062	SMARCD3;MAPK14	2.273% (1/44)	0.00522179	2.28	ENSG00000081189	MEF2C	4.545% (2/44)	0.00883948	2.05	ENSG00000082014;ENSG00000112062	SMARCD3;MAPK14	2.273% (1/44)	0.00475159	2.32	ENSG00000081189	MEF2C
9	7.69	GO:0045600	positive regulation of fat cell differentiation	Any process that activates or increases the frequency, rate or extent of adipocyte differentiation.	14.925% (10/67)	0.00211903	2.67	ENSG00000104375;ENSG00000109906;ENSG00000112062;ENSG00000132170;ENSG00000142208;ENSG00000143970;ENSG00000169895;ENSG00000175445;ENSG00000184828;ENSG00000185650	STK3;ZBTB16;MAPK14;PPARG;AKT1;ASXL2;SYAP1;LPL;ZBTB7C;ZFP36L1	5.97% (4/67)	0.00681106	2.17	ENSG00000112062;ENSG00000132170;ENSG00000184828;ENSG00000185650	MAPK14;PPARG;ZBTB7C;ZFP36L1	0% (0/67)	0.00372096	2.43	NA	NA	2.985% (2/67)	0.00896107	2.05	ENSG00000109906;ENSG00000112062	ZBTB16;MAPK14	0% (0/67)	0.00323826	2.49	NA	NA
9	8.87	GO:2000738	positive regulation of stem cell differentiation	NA	0% (0/21)	0.00491517	2.31	NA	NA	0% (0/21)	0.070139	1.15	NA	NA	0% (0/21)	0.112976	0.95	NA	NA	4.762% (1/21)	0.172204	0.76	NA	NA	0% (0/21)	0.105662	0.98	NA	NA
9	4.88	GO:0045597	positive regulation of cell differentiation	Any process that activates or increases the frequency, rate or extent of cell differentiation.	16.57% (143/863)	0.0345643	1.46	NA	NA	5.098% (44/863)	0.00574332	2.24	ENSG00000012223;ENSG00000038427;ENSG00000049768;ENSG00000081479;ENSG00000082014;ENSG00000091129;ENSG00000099250;ENSG00000107954;ENSG00000112062;ENSG00000112299;ENSG00000113520;ENSG00000115170;ENSG00000120833;ENSG00000121594;ENSG00000121989;ENSG00000124205;ENSG00000132170;ENSG00000134460;ENSG00000134909;ENSG00000135046;ENSG00000135218;ENSG00000135919;ENSG00000138735;ENSG00000138829;ENSG00000147883…	LTF;VCAN;FOXP3;LRP2;SMARCD3;NRCAM;NRP1;NEURL1;MAPK14;VNN1;IL4;ACVR1;SOCS2;CD80;ACVR2A;EDN3;PPARG;IL2RA;ARHGAP32;ANXA1;CD36;SERPINE2;PDE5A;FBN2;CDKN2B;ADM;AKAP6;NRG1;LRP8;DISC1;PF4;HMGB2;DCSTAMP;FAXDC2;PDE3A;BAIAP2;GATA2;SOCS3;ZBTB7C;ZFP36L1;HLA-DRB1;LAMA2;PLXNA4;NEFL	0.116% (1/863)	4.63e-05	4.33	ENSG00000081189	MEF2C	2.549% (22/863)	0.000191858	3.72	ENSG00000012223;ENSG00000066279;ENSG00000082014;ENSG00000091129;ENSG00000106462;ENSG00000109906;ENSG00000111249;ENSG00000112062;ENSG00000122641;ENSG00000132386;ENSG00000134909;ENSG00000135218;ENSG00000135776;ENSG00000136634;ENSG00000138685;ENSG00000147883;ENSG00000150093;ENSG00000151320;ENSG00000157168;ENSG00000157404;ENSG00000170515;ENSG00000198805	LTF;ASPM;SMARCD3;NRCAM;EZH2;ZBTB16;CUX2;MAPK14;INHBA;SERPINF1;ARHGAP32;CD36;ABCB10;IL10;FGF2;CDKN2B;ITGB1;AKAP6;NRG1;KIT;PA2G4;PNP	1.043% (9/863)	0.000261147	3.58	ENSG00000012223;ENSG00000081189;ENSG00000091129;ENSG00000114315;ENSG00000122641;ENSG00000134909;ENSG00000150093;ENSG00000151320;ENSG00000184349	LTF;MEF2C;NRCAM;HES1;INHBA;ARHGAP32;ITGB1;AKAP6;EFNA5
9	8.34	GO:0051150	regulation of smooth muscle cell differentiation	Any process that modulates the frequency, rate or extent of smooth muscle cell differentiation.	14.286% (5/35)	0.0157559	1.8	NA	NA	2.857% (1/35)	0.0064099	2.19	ENSG00000082014	SMARCD3	0% (0/35)	0.00468371	2.33	NA	NA	5.714% (2/35)	0.0161371	1.79	NA	NA	0% (0/35)	0.00417231	2.38	NA	NA
9	7.57	GO:0051153	regulation of striated muscle cell differentiation	Any process that modulates the frequency, rate or extent of striated muscle cell differentiation.	8.642% (7/81)	0.00892735	2.05	ENSG00000068024;ENSG00000106462;ENSG00000112062;ENSG00000114861;ENSG00000136999;ENSG00000157168;ENSG00000176697	HDAC4;EZH2;MAPK14;FOXP1;CCN3;NRG1;BDNF	4.938% (4/81)	0.0555743	1.26	NA	NA	1.235% (1/81)	0.025616	1.59	NA	NA	4.938% (4/81)	0.0635605	1.2	NA	NA	2.469% (2/81)	0.0401326	1.4	NA	NA
9	6.97	GO:0051147	regulation of muscle cell differentiation	Any process that modulates the frequency, rate or extent of muscle cell differentiation.	12.409% (17/137)	0.109943	0.96	NA	NA	4.38% (6/137)	0.0564104	1.25	NA	NA	0.73% (1/137)	0.064546	1.19	NA	NA	4.38% (6/137)	0.00395256	2.4	ENSG00000082014;ENSG00000106462;ENSG00000112062;ENSG00000151320;ENSG00000157168;ENSG00000157404	SMARCD3;EZH2;MAPK14;AKAP6;NRG1;KIT	1.46% (2/137)	0.0589248	1.23	NA	NA
9	4.12	GO:0045595	regulation of cell differentiation	Any process that modulates the frequency, rate or extent of cell differentiation, the process in which relatively unspecialized cells acquire specialized structural and functional features.	16.571% (260/1569)	0.0226228	1.65	NA	NA	4.525% (71/1569)	0.000329985	3.48	ENSG00000010319;ENSG00000012223;ENSG00000038427;ENSG00000049768;ENSG00000055332;ENSG00000057657;ENSG00000068024;ENSG00000078747;ENSG00000081479;ENSG00000082014;ENSG00000091129;ENSG00000099250;ENSG00000100320;ENSG00000104447;ENSG00000105810;ENSG00000107954;ENSG00000108576;ENSG00000112062;ENSG00000112299;ENSG00000113520;ENSG00000115170;ENSG00000115904;ENSG00000116044;ENSG00000120833;ENSG00000121236…	SEMA3G;LTF;VCAN;FOXP3;EIF2AK2;PRDM1;HDAC4;ITCH;LRP2;SMARCD3;NRCAM;NRP1;RBFOX2;TRPS1;CDK6;NEURL1;SLC6A4;MAPK14;VNN1;IL4;ACVR1;SOS1;NFE2L2;SOCS2;TRIM6;CD80;CCR2;ACVR2A;TNFAIP6;EDN3;CDKN1C;LDLR;PPARG;GRHL1;IL2RA;ARHGAP32;ANXA1;CD36;GPR55;SERPINE2;PDE5A;FBN2;FANCD2;DAAM2;CDKN2B;ADM;AKAP6;NRG1;LRP8;DISC1;PF4;HMGB2;DCSTAMP;PRTG;SEMA6B;FAXDC2;PDE3A;GPR171;BAIAP2;GATA2;NOG;SOCS3;ZBTB7C;ZFP36L1;HLA-DRB1;F…	0.064% (1/1569)	0.000109086	3.96	ENSG00000081189	MEF2C	2.103% (33/1569)	0.00038486	3.41	ENSG00000012223;ENSG00000056586;ENSG00000065883;ENSG00000066279;ENSG00000082014;ENSG00000091129;ENSG00000100320;ENSG00000101412;ENSG00000104447;ENSG00000106462;ENSG00000109906;ENSG00000111249;ENSG00000112062;ENSG00000122641;ENSG00000128245;ENSG00000132386;ENSG00000134909;ENSG00000135218;ENSG00000135776;ENSG00000136634;ENSG00000138685;ENSG00000147883;ENSG00000147889;ENSG00000150093;ENSG00000151320…	LTF;RC3H2;CDK13;ASPM;SMARCD3;NRCAM;RBFOX2;E2F1;TRPS1;EZH2;ZBTB16;CUX2;MAPK14;INHBA;YWHAH;SERPINF1;ARHGAP32;CD36;ABCB10;IL10;FGF2;CDKN2B;CDKN2A;ITGB1;AKAP6;NRG1;KIT;PA2G4;ERFE;NOG;FAT4;AJAP1;PNP	0.956% (15/1569)	5.16e-05	4.29	ENSG00000012223;ENSG00000081189;ENSG00000091129;ENSG00000110987;ENSG00000114315;ENSG00000122641;ENSG00000129757;ENSG00000134909;ENSG00000134986;ENSG00000139174;ENSG00000147889;ENSG00000150093;ENSG00000151320;ENSG00000164056;ENSG00000184349	LTF;MEF2C;NRCAM;BCL7A;HES1;INHBA;CDKN1C;ARHGAP32;NREP;PRICKLE1;CDKN2A;ITGB1;AKAP6;SPRY1;EFNA5
9	6.92	GO:0045598	regulation of fat cell differentiation	Any process that modulates the frequency, rate or extent of adipocyte differentiation.	11.538% (15/130)	0.0130345	1.88	NA	NA	3.846% (5/130)	0.00407089	2.39	ENSG00000112062;ENSG00000132170;ENSG00000179348;ENSG00000184828;ENSG00000185650	MAPK14;PPARG;GATA2;ZBTB7C;ZFP36L1	0% (0/130)	0.00932023	2.03	NA	NA	2.308% (3/130)	0.00924978	2.03	ENSG00000101412;ENSG00000109906;ENSG00000112062	E2F1;ZBTB16;MAPK14	0.769% (1/130)	0.0169799	1.77	NA	NA
9	6.18	GO:0010721	negative regulation of cell development	Any process that decreases the rate, frequency or extent of the progression of the cell over time, from its formation to the mature structure. Cell development does not include the steps involved in committing a cell to a specific fate.	17.204% (48/279)	0.00698216	2.16	ENSG00000007372;ENSG00000008438;ENSG00000012223;ENSG00000019582;ENSG00000053108;ENSG00000056586;ENSG00000066135;ENSG00000077238;ENSG00000082701;ENSG00000100697;ENSG00000105426;ENSG00000105639;ENSG00000105810;ENSG00000108379;ENSG00000109670;ENSG00000113013;ENSG00000113520;ENSG00000113916;ENSG00000115310;ENSG00000122641;ENSG00000123610;ENSG00000125538;ENSG00000130164;ENSG00000130584;ENSG00000135046…	PAX6;PGLYRP1;LTF;CD74;FSTL4;RC3H2;KDM4A;IL4R;GSK3B;DICER1;PTPRS;JAK3;CDK6;WNT3;FBXW7;HSPA9;IL4;BCL6;RTN4;INHBA;TNFAIP6;IL1B;LDLR;ZBTB46;ANXA1;EDNRB;KIAA0319;SEMA7A;RB1;CUL4A;MBD1;CERS2;DAAM2;DYNLT1;CDKN2B;CDKN2A;TRIM46;B2M;SEMA6B;PRDX2;CTNNB1;HOOK3;ERFE;GATA2;NOG;NF1;CR1;S1PR3	5.735% (16/279)	0.0895377	1.05	NA	NA	0% (0/279)	0.0583911	1.23	NA	NA	2.867% (8/279)	0.0135177	1.87	NA	NA	1.434% (4/279)	0.170259	0.77	NA	NA
9	7.88	GO:0045599	negative regulation of fat cell differentiation	Any process that stops, prevents, or reduces the frequency, rate or extent of adipocyte differentiation.	7.843% (4/51)	0.00649677	2.19	ENSG00000073712;ENSG00000099953;ENSG00000101384;ENSG00000179348	FERMT2;MMP11;JAG1;GATA2	1.961% (1/51)	0.0196226	1.71	NA	NA	0% (0/51)	0.0368379	1.43	NA	NA	1.961% (1/51)	0.0463901	1.33	NA	NA	0% (0/51)	0.0336311	1.47	NA	NA
9	5.18	GO:0045596	negative regulation of cell differentiation	Any process that stops, prevents, or reduces the frequency, rate or extent of cell differentiation.	15.805% (107/677)	0.309691	0.51	NA	NA	3.545% (24/677)	0.00139986	2.85	ENSG00000010319;ENSG00000012223;ENSG00000049768;ENSG00000068024;ENSG00000099250;ENSG00000105810;ENSG00000108576;ENSG00000113520;ENSG00000116044;ENSG00000121236;ENSG00000123610;ENSG00000130164;ENSG00000132170;ENSG00000135046;ENSG00000135898;ENSG00000146122;ENSG00000147883;ENSG00000163737;ENSG00000166450;ENSG00000167680;ENSG00000174946;ENSG00000179348;ENSG00000183691;ENSG00000185650	SEMA3G;LTF;FOXP3;HDAC4;NRP1;CDK6;SLC6A4;IL4;NFE2L2;TRIM6;TNFAIP6;LDLR;PPARG;ANXA1;GPR55;DAAM2;CDKN2B;PF4;PRTG;SEMA6B;GPR171;GATA2;NOG;ZFP36L1	0% (0/677)	0.00164312	2.78	NA	NA	2.068% (14/677)	0.000656079	3.18	ENSG00000012223;ENSG00000056586;ENSG00000065883;ENSG00000066279;ENSG00000101412;ENSG00000106462;ENSG00000109906;ENSG00000122641;ENSG00000128245;ENSG00000147883;ENSG00000147889;ENSG00000150093;ENSG00000178752;ENSG00000183691	LTF;RC3H2;CDK13;ASPM;E2F1;EZH2;ZBTB16;INHBA;YWHAH;CDKN2B;CDKN2A;ITGB1;ERFE;NOG	1.182% (8/677)	0.00409772	2.39	ENSG00000012223;ENSG00000110987;ENSG00000114315;ENSG00000122641;ENSG00000139174;ENSG00000147889;ENSG00000150093;ENSG00000164056	LTF;BCL7A;HES1;INHBA;PRICKLE1;CDKN2A;ITGB1;SPRY1
10	5.31	GO:0048589	developmental growth	The increase in size or mass of an entire organism, a part of an organism or a cell, where the increase in size or mass has the specific outcome of the progression of the organism over time from one condition to another.	16.592% (111/669)	0.00109287	2.96	ENSG00000008083;ENSG00000034053;ENSG00000043143;ENSG00000043591;ENSG00000049759;ENSG00000053108;ENSG00000056586;ENSG00000066279;ENSG00000066468;ENSG00000067606;ENSG00000072840;ENSG00000074966;ENSG00000076555;ENSG00000082701;ENSG00000085733;ENSG00000089057;ENSG00000090432;ENSG00000091129;ENSG00000100601;ENSG00000101126;ENSG00000104320;ENSG00000104375;ENSG00000105426;ENSG00000105429;ENSG00000106462…	JARID2;APBA2;JADE2;ADRB1;NEDD4L;FSTL4;RC3H2;ASPM;FGFR2;PRKCZ;EVC;TXK;ACACB;GSK3B;CTTN;SLC23A2;MUL1;NRCAM;ALKBH1;ADNP;NBN;STK3;PTPRS;MEGF8;EZH2;EIF4H;TGFBR1;APBA1;PPP3CB;WNT3;RPS6KB1;ZPR1;EIF4G2;MAPK14;WASF1;PTK7;KPNA1;WDR48;FOXP1;TTL;RTN4;FN1;SOS1;LEPR;FOXO3;SOCS2;TNFAIP6;NRN1;BBS2;MED1;VIL1;CDKN1C;GDF15;LATS1;ATP8A2;ARHGAP32;ANXA1;CCN3;KIAA0319;RTF1;SEMA7A;PEX5;AFG3L2;AKT1;VPS54;MEIS1;SLC4A10;C9…	5.082% (34/669)	0.0567306	1.25	NA	NA	0.448% (3/669)	0.00215369	2.67	ENSG00000081189;ENSG00000112655;ENSG00000198399	MEF2C;PTK7;ITSN2	3.288% (22/669)	0.00361814	2.44	ENSG00000034053;ENSG00000049759;ENSG00000056586;ENSG00000066279;ENSG00000072840;ENSG00000074966;ENSG00000091129;ENSG00000106462;ENSG00000112062;ENSG00000112290;ENSG00000114999;ENSG00000116678;ENSG00000124785;ENSG00000130513;ENSG00000134909;ENSG00000138685;ENSG00000144290;ENSG00000150093;ENSG00000151320;ENSG00000157168;ENSG00000183691;ENSG00000225830	APBA2;NEDD4L;RC3H2;ASPM;EVC;TXK;NRCAM;EZH2;MAPK14;WASF1;TTL;LEPR;NRN1;GDF15;ARHGAP32;FGF2;SLC4A10;ITGB1;AKAP6;NRG1;NOG;ERCC6	1.943% (13/669)	0.0128719	1.89	NA	NA
10	9.67	GO:0001833	inner cell mass cell proliferation	The proliferation of cells in the inner cell mass.	21.429% (3/14)	0.107043	0.97	NA	NA	0% (0/14)	0.00865444	2.06	NA	NA	0% (0/14)	0.0135341	1.87	NA	NA	0% (0/14)	0.00990091	2	NA	NA	0% (0/14)	0.0127093	1.9	NA	NA
10	8.25	GO:0046622	positive regulation of organ growth	Any process that activates or increases the frequency, rate or extent of growth of an organ of an organism.	13.333% (6/45)	0.00327102	2.49	ENSG00000066468;ENSG00000076555;ENSG00000112062;ENSG00000142208;ENSG00000157168;ENSG00000170312	FGFR2;ACACB;MAPK14;AKT1;NRG1;CDK1	6.667% (3/45)	0.00310218	2.51	ENSG00000112062;ENSG00000151320;ENSG00000157168	MAPK14;AKAP6;NRG1	2.222% (1/45)	0.00574372	2.24	ENSG00000081189	MEF2C	8.889% (4/45)	0.00995528	2	ENSG00000112062;ENSG00000138685;ENSG00000151320;ENSG00000157168	MAPK14;FGF2;AKAP6;NRG1	4.444% (2/45)	0.00525094	2.28	ENSG00000081189;ENSG00000151320	MEF2C;AKAP6
10	7.9	GO:0040014	regulation of multicellular organism growth	Any process that modulates the frequency, rate or extent of growth of the body of an organism so that it reaches its usual body size.	17.91% (12/67)	0.05556	1.26	NA	NA	4.478% (3/67)	0.0342572	1.47	NA	NA	0% (0/67)	0.0115793	1.94	NA	NA	1.493% (1/67)	0.0115736	1.94	NA	NA	0% (0/67)	0.00994691	2	NA	NA
10	6.19	GO:0048638	regulation of developmental growth	Any process that modulates the frequency, rate or extent of developmental growth.	16.46% (53/322)	0.0230589	1.64	NA	NA	5.901% (19/322)	0.0064072	2.19	ENSG00000008083;ENSG00000010319;ENSG00000085733;ENSG00000091129;ENSG00000099250;ENSG00000103528;ENSG00000108576;ENSG00000112062;ENSG00000120833;ENSG00000127831;ENSG00000130513;ENSG00000134909;ENSG00000151320;ENSG00000157168;ENSG00000162946;ENSG00000167680;ENSG00000183691;ENSG00000187955;ENSG00000221866	JARID2;SEMA3G;CTTN;NRCAM;NRP1;SYT17;SLC6A4;MAPK14;SOCS2;VIL1;GDF15;ARHGAP32;AKAP6;NRG1;DISC1;SEMA6B;NOG;COL14A1;PLXNA4	0.621% (2/322)	0.0185794	1.73	NA	NA	3.106% (10/322)	0.0487411	1.31	NA	NA	1.863% (6/322)	0.0688233	1.16	NA	NA
10	7.3	GO:0048640	negative regulation of developmental growth	Any process that stops, prevents, or reduces the frequency, rate or extent of developmental growth.	16.667% (18/108)	0.0457418	1.34	NA	NA	7.407% (8/108)	0.0379809	1.42	NA	NA	0% (0/108)	0.00487878	2.31	NA	NA	1.852% (2/108)	0.00570532	2.24	ENSG00000130513;ENSG00000183691	GDF15;NOG	0% (0/108)	0.00442423	2.35	NA	NA
10	4.3	GO:2000026	regulation of multicellular organismal development	NA	17.317% (244/1409)	0.00283824	2.55	ENSG00000004487;ENSG00000005513;ENSG00000006712;ENSG00000007372;ENSG00000008083;ENSG00000008438;ENSG00000010671;ENSG00000011465;ENSG00000012223;ENSG00000019582;ENSG00000038427;ENSG00000042832;ENSG00000043143;ENSG00000046653;ENSG00000053108;ENSG00000056586;ENSG00000057657;ENSG00000057757;ENSG00000058668;ENSG00000060237;ENSG00000065526;ENSG00000066056;ENSG00000066135;ENSG00000066279;ENSG00000066468…	KDM1A;SOX8;PAF1;PAX6;JARID2;PGLYRP1;BTK;DCN;LTF;CD74;VCAN;TG;JADE2;GPM6B;FSTL4;RC3H2;PRDM1;PITHD1;ATP2B4;WNK1;SPEN;TIE1;KDM4A;ASPM;FGFR2;SP100;PRKCZ;ROCK1;EPN2;ACACB;IL4R;NRDC;LRP2;SMARCD3;P2RX7;SMARCB1;HMOX1;RBFOX2;SOS2;DICER1;ADNP;JAG1;ACTR5;RGCC;SLC7A5;EEF2K;TRPS1;RETN;PTPRS;MEGF8;JAK3;CDK6;ITGB8;EZH2;RHEB;TGFBR1;NEURL1;WNT3;SMARCD2;FBXW7;ZBTB16;ZPR1;EIF4G2;CUX2;IFNG;SASH1;MAPK14;VNN1;HSPA9;IL…	5.465% (77/1409)	0.00312595	2.51	ENSG00000008083;ENSG00000010319;ENSG00000010327;ENSG00000012223;ENSG00000038427;ENSG00000049768;ENSG00000057657;ENSG00000067066;ENSG00000081479;ENSG00000082014;ENSG00000099250;ENSG00000100320;ENSG00000104447;ENSG00000105810;ENSG00000105855;ENSG00000107954;ENSG00000111335;ENSG00000111961;ENSG00000112062;ENSG00000112299;ENSG00000113520;ENSG00000115170;ENSG00000115904;ENSG00000116044;ENSG00000116717…	JARID2;SEMA3G;STAB1;LTF;VCAN;FOXP3;PRDM1;SP100;LRP2;SMARCD3;NRP1;RBFOX2;TRPS1;CDK6;ITGB8;NEURL1;OAS2;SASH1;MAPK14;VNN1;IL4;ACVR1;SOS1;NFE2L2;GADD45A;TEK;CD80;CCR2;ACVR2A;TNFAIP6;CDKN1C;LDLR;PPARG;CHI3L1;GRHL1;IL2RA;APLNR;ARHGAP32;ANXA1;GPR55;SERPINE2;CYP1B1;ANXA3;FBN2;FANCD2;DAAM2;CDKN2B;ADM;AKAP6;NRG1;LRP8;JAK1;DISC1;PF4;CAMP;HMGB2;DCSTAMP;PRTG;SEMA6B;MINAR1;FAXDC2;LRRN3;GPR171;BAIAP2;GATA2;SLIT…	0.213% (3/1409)	0.000383431	3.42	ENSG00000070961;ENSG00000081189;ENSG00000142798	ATP2B1;MEF2C;HSPG2	2.981% (42/1409)	0.00262658	2.58	ENSG00000012223;ENSG00000056586;ENSG00000066279;ENSG00000067066;ENSG00000082014;ENSG00000089041;ENSG00000100320;ENSG00000104447;ENSG00000106462;ENSG00000109906;ENSG00000111249;ENSG00000112062;ENSG00000114166;ENSG00000116717;ENSG00000119630;ENSG00000122641;ENSG00000128245;ENSG00000132386;ENSG00000134909;ENSG00000135776;ENSG00000136634;ENSG00000138685;ENSG00000138772;ENSG00000147883;ENSG00000147889…	LTF;RC3H2;ASPM;SP100;SMARCD3;P2RX7;RBFOX2;TRPS1;EZH2;ZBTB16;CUX2;MAPK14;KAT2B;GADD45A;PGF;INHBA;YWHAH;SERPINF1;ARHGAP32;ABCB10;IL10;FGF2;ANXA3;CDKN2B;CDKN2A;ITGB1;AKAP6;PDE3B;ADAMTS1;NRG1;KIT;JAK1;CAMP;TMIGD2;C3AR1;LINGO2;ERFE;CCR3;NOG;FAT4;AJAP1;PNP	0.923% (13/1409)	0.000683649	3.17	ENSG00000012223;ENSG00000081189;ENSG00000114315;ENSG00000122641;ENSG00000129757;ENSG00000134909;ENSG00000147889;ENSG00000150093;ENSG00000151320;ENSG00000164047;ENSG00000164056;ENSG00000172071;ENSG00000184349	LTF;MEF2C;HES1;INHBA;CDKN1C;ARHGAP32;CDKN2A;ITGB1;AKAP6;CAMP;SPRY1;EIF2AK3;EFNA5
10	6.18	GO:1901342	regulation of vasculature development	NA	18.644% (55/295)	0.027998	1.55	NA	NA	7.119% (21/295)	0.0149068	1.83	NA	NA	0.339% (1/295)	0.00791011	2.1	ENSG00000142798	HSPG2	5.085% (15/295)	0.234207	0.63	NA	NA	0.678% (2/295)	0.00735239	2.13	ENSG00000150093;ENSG00000164047	ITGB1;CAMP
10	7.24	GO:0016525	negative regulation of angiogenesis	Any process that stops, prevents, or reduces the frequency, rate or extent of angiogenesis.	20.192% (21/104)	0.0216994	1.66	NA	NA	6.731% (7/104)	0.00769585	2.11	ENSG00000010327;ENSG00000116717;ENSG00000120156;ENSG00000121807;ENSG00000132170;ENSG00000163737;ENSG00000169330	STAB1;GADD45A;TEK;CCR2;PPARG;PF4;MINAR1	0.962% (1/104)	0.00106892	2.97	ENSG00000142798	HSPG2	3.846% (4/104)	0.00148307	2.83	ENSG00000116717;ENSG00000132386;ENSG00000152270;ENSG00000154734	GADD45A;SERPINF1;PDE3B;ADAMTS1	0% (0/104)	0.000595266	3.23	NA	NA
10	6.86	GO:0045766	positive regulation of angiogenesis	Any process that activates or increases angiogenesis.	18.182% (30/165)	0.00241662	2.62	ENSG00000060237;ENSG00000066056;ENSG00000100292;ENSG00000105855;ENSG00000111961;ENSG00000115310;ENSG00000116044;ENSG00000119630;ENSG00000120156;ENSG00000125538;ENSG00000125730;ENSG00000131845;ENSG00000132205;ENSG00000133048;ENSG00000136634;ENSG00000138061;ENSG00000138772;ENSG00000143494;ENSG00000143878;ENSG00000148926;ENSG00000150093;ENSG00000162434;ENSG00000163349;ENSG00000163513;ENSG00000164047…	WNK1;TIE1;HMOX1;ITGB8;SASH1;RTN4;NFE2L2;PGF;TEK;IL1B;C3;ZNF304;EMILIN2;CHI3L1;IL10;CYP1B1;ANXA3;VASH2;RHOB;ADM;ITGB1;JAK1;HIPK1;TGFBR2;CAMP;CYBB;TMIGD2;GATA2;CCR3;PDCD6	8.485% (14/165)	0.00442358	2.35	ENSG00000099250;ENSG00000105855;ENSG00000111961;ENSG00000116044;ENSG00000120156;ENSG00000133048;ENSG00000134817;ENSG00000138061;ENSG00000138772;ENSG00000148926;ENSG00000162434;ENSG00000164047;ENSG00000179348;ENSG00000183625	NRP1;ITGB8;SASH1;NFE2L2;TEK;CHI3L1;APLNR;CYP1B1;ANXA3;ADM;JAK1;CAMP;GATA2;CCR3	0% (0/165)	2.6e-05	4.59	NA	NA	6.061% (10/165)	0.00154052	2.81	ENSG00000119630;ENSG00000136634;ENSG00000138685;ENSG00000138772;ENSG00000150093;ENSG00000162434;ENSG00000164047;ENSG00000167664;ENSG00000171860;ENSG00000183625	PGF;IL10;FGF2;ANXA3;ITGB1;JAK1;CAMP;TMIGD2;C3AR1;CCR3	1.212% (2/165)	7.21e-05	4.14	ENSG00000150093;ENSG00000164047	ITGB1;CAMP
10	8.39	GO:1903670	regulation of sprouting angiogenesis	NA	7.692% (3/39)	0.000864585	3.06	ENSG00000072134;ENSG00000136634;ENSG00000162434	EPN2;IL10;JAK1	2.564% (1/39)	0.00362193	2.44	ENSG00000162434	JAK1	0% (0/39)	0.00278088	2.56	NA	NA	7.692% (3/39)	0.0306939	1.51	NA	NA	0% (0/39)	0.00246497	2.61	NA	NA
10	6.19	GO:0045765	regulation of angiogenesis	Any process that modulates the frequency, rate or extent of angiogenesis.	18.339% (53/289)	0.0209644	1.68	NA	NA	7.266% (21/289)	0.0314828	1.5	NA	NA	0.346% (1/289)	0.0150636	1.82	NA	NA	5.19% (15/289)	0.00580743	2.24	ENSG00000067066;ENSG00000116717;ENSG00000119630;ENSG00000132386;ENSG00000136634;ENSG00000138685;ENSG00000138772;ENSG00000150093;ENSG00000152270;ENSG00000154734;ENSG00000162434;ENSG00000164047;ENSG00000167664;ENSG00000171860;ENSG00000183625	SP100;GADD45A;PGF;SERPINF1;IL10;FGF2;ANXA3;ITGB1;PDE3B;ADAMTS1;JAK1;CAMP;TMIGD2;C3AR1;CCR3	0.692% (2/289)	0.0141705	1.85	NA	NA
10	9.47	GO:1902337	regulation of apoptotic process involved in morphogenesis	NA	0% (0/13)	0.00442448	2.35	NA	NA	0% (0/13)	0.0110065	1.96	NA	NA	0% (0/13)	0.0125336	1.9	NA	NA	0% (0/13)	0.0114132	1.94	NA	NA	0% (0/13)	0.0122814	1.91	NA	NA
10	6.44	GO:0022604	regulation of cell morphogenesis	Any process that modulates the frequency, rate or extent of cell morphogenesis. Cell morphogenesis is the developmental process in which the shape of a cell is generated and organized.	16.735% (41/245)	0.0145506	1.84	NA	NA	4.898% (12/245)	0.0045935	2.34	ENSG00000023902;ENSG00000026508;ENSG00000100473;ENSG00000103528;ENSG00000127831;ENSG00000135046;ENSG00000145555;ENSG00000157193;ENSG00000163171;ENSG00000175866;ENSG00000176293;ENSG00000221866	PLEKHO1;CD44;COCH;SYT17;VIL1;ANXA1;MYO10;LRP8;CDC42EP3;BAIAP2;ZNF135;PLXNA4	0.408% (1/245)	0.000873002	3.06	ENSG00000198399	ITSN2	2.857% (7/245)	0.00220362	2.66	ENSG00000049759;ENSG00000111249;ENSG00000140416;ENSG00000145555;ENSG00000157404;ENSG00000163171;ENSG00000176293	NEDD4L;CUX2;TPM1;MYO10;KIT;CDC42EP3;ZNF135	1.633% (4/245)	0.00167587	2.78	ENSG00000103528;ENSG00000116574;ENSG00000176293;ENSG00000184349	SYT17;RHOU;ZNF135;EFNA5
10	3.55	GO:0050793	regulation of developmental process	Any process that modulates the frequency, rate or extent of development, the biological process whose specific outcome is the progression of a multicellular organism over time from an initial condition (e.g. a zygote, or a young adult) to a later condition (e.g. a multicellular animal or an aged adult).	17.041% (417/2447)	0.000295534	3.53	ENSG00000004487;ENSG00000005513;ENSG00000006712;ENSG00000006740;ENSG00000007372;ENSG00000008083;ENSG00000008438;ENSG00000010361;ENSG00000010671;ENSG00000011304;ENSG00000011465;ENSG00000012223;ENSG00000019582;ENSG00000019995;ENSG00000023902;ENSG00000025434;ENSG00000026508;ENSG00000037280;ENSG00000037474;ENSG00000038427;ENSG00000042832;ENSG00000043143;ENSG00000043591;ENSG00000046653;ENSG00000047597…	KDM1A;SOX8;PAF1;ARHGAP44;PAX6;JARID2;PGLYRP1;FUZ;BTK;PTBP1;DCN;LTF;CD74;ZRANB1;PLEKHO1;NR1H3;CD44;FLT4;NSUN2;VCAN;TG;JADE2;ADRB1;GPM6B;XK;NEDD4L;FSTL4;EIF2AK2;RC3H2;PRDM1;PITHD1;ATP2B4;DGKG;WNK1;LTK;ADCK1;SPEN;CDK13;ELAVL1;TIE1;KDM4A;ASPM;FGFR2;SP100;TP53BP1;PRKCZ;ROCK1;HDAC4;NEDD4;MAPK6;WDR1;EPN2;TFRC;NFATC3;FERMT2;CELSR1;ARHGAP15;MLH1;ACACB;MBNL3;RAP1GAP;IL4R;NRDC;ITCH;LRP2;SMARCD3;GSK3B;CTTN;P…	4.618% (113/2447)	0.0978941	1.01	NA	NA	0.245% (6/2447)	0.012201	1.91	NA	NA	2.493% (61/2447)	0.0182036	1.74	NA	NA	0.858% (21/2447)	0.0250979	1.6	NA	NA
10	8.12	GO:1901861	regulation of muscle tissue development	NA	8.333% (4/48)	0.00804889	2.09	ENSG00000108443;ENSG00000109819;ENSG00000168036;ENSG00000172046	RPS6KB1;PPARGC1A;CTNNB1;USP19	0% (0/48)	0.0297978	1.53	NA	NA	2.083% (1/48)	0.0189627	1.72	NA	NA	0% (0/48)	0.0354538	1.45	NA	NA	2.083% (1/48)	0.113973	0.94	NA	NA
10	8.39	GO:1902459	positive regulation of stem cell population maintenance	NA	14.583% (7/48)	0.00148225	2.83	ENSG00000099956;ENSG00000102054;ENSG00000116478;ENSG00000124151;ENSG00000133884;ENSG00000164105;ENSG00000213626	SMARCB1;RBBP7;HDAC1;NCOA3;DPF2;SAP30;LBH	2.083% (1/48)	0.000165824	3.78	ENSG00000164105	SAP30	0% (0/48)	0.000361168	3.44	NA	NA	2.083% (1/48)	0.000217202	3.66	ENSG00000164105	SAP30	2.083% (1/48)	0.000987238	3.01	ENSG00000110987	BCL7A
10	7.4	GO:2000036	regulation of stem cell population maintenance	NA	12.5% (9/72)	0.000393908	3.4	ENSG00000066044;ENSG00000099956;ENSG00000102054;ENSG00000116478;ENSG00000124151;ENSG00000133884;ENSG00000162227;ENSG00000164105;ENSG00000213626	ELAVL1;SMARCB1;RBBP7;HDAC1;NCOA3;DPF2;TAF6L;SAP30;LBH	1.389% (1/72)	0.00035801	3.45	ENSG00000164105	SAP30	0% (0/72)	0.000727145	3.14	NA	NA	1.389% (1/72)	0.000442146	3.35	ENSG00000164105	SAP30	1.389% (1/72)	0.000663047	3.18	ENSG00000110987	BCL7A
10	8.78	GO:0001759	organ induction	The interaction of two or more cells or tissues that causes them to change their fates and specify the development of an organ.	4.348% (1/23)	0.00585521	2.23	ENSG00000168036	CTNNB1	0% (0/23)	0.022284	1.65	NA	NA	0% (0/23)	0.0376864	1.42	NA	NA	4.348% (1/23)	0.0741082	1.13	NA	NA	4.348% (1/23)	0.0945745	1.02	NA	NA
10	8.26	GO:0110110	positive regulation of animal organ morphogenesis	Any process that activates or increases the frequency, rate or extent of animal organ morphogenesis.	8.333% (3/36)	0.231654	0.64	NA	NA	0% (0/36)	0.00674641	2.17	NA	NA	0% (0/36)	0.0143003	1.84	NA	NA	2.778% (1/36)	0.0225678	1.65	NA	NA	2.778% (1/36)	0.0326087	1.49	NA	NA
11	6.91	GO:0010976	positive regulation of neuron projection development	Any process that increases the rate, frequency or extent of neuron projection development. Neuron projection development is the process whose specific outcome is the progression of a neuron projection over time, from its formation to the mature structure. A neuron projection is any process extending from a neural cell, such as axons or dendrites (collectively called neurites).	21.519% (34/158)	0.021526	1.67	NA	NA	5.063% (8/158)	0.00121976	2.91	ENSG00000107290;ENSG00000112655;ENSG00000116044;ENSG00000157193;ENSG00000162946;ENSG00000163220;ENSG00000175866;ENSG00000185483	SETX;PTK7;NFE2L2;LRP8;DISC1;S100A9;BAIAP2;ROR1	0.633% (1/158)	0.000812841	3.09	ENSG00000112655	PTK7	3.797% (6/158)	0.00269655	2.57	ENSG00000106462;ENSG00000111249;ENSG00000112335;ENSG00000114166;ENSG00000132386;ENSG00000149557	EZH2;CUX2;SNX3;KAT2B;SERPINF1;FEZ1	0% (0/158)	0.00039284	3.41	NA	NA
11	5.64	GO:0010975	regulation of neuron projection development	Any process that modulates the rate, frequency or extent of neuron projection development. Neuron projection development is the process whose specific outcome is the progression of a neuron projection over time, from its formation to the mature structure. A neuron projection is any process extending from a neural cell, such as axons or dendrites (collectively called neurites).	18.996% (87/458)	0.0329378	1.48	NA	NA	4.585% (21/458)	0.0182964	1.74	NA	NA	0.218% (1/458)	0.00921091	2.04	ENSG00000112655	PTK7	3.275% (15/458)	0.0267497	1.57	NA	NA	1.092% (5/458)	0.0322944	1.49	NA	NA
11	7.32	GO:0050773	regulation of dendrite development	Any process that modulates the frequency, rate or extent of dendrite development.	17.172% (17/99)	0.0230276	1.64	NA	NA	2.02% (2/99)	0.0137641	1.86	NA	NA	0% (0/99)	0.0275885	1.56	NA	NA	6.061% (6/99)	0.00151716	2.82	ENSG00000049759;ENSG00000106462;ENSG00000111249;ENSG00000125249;ENSG00000128245;ENSG00000169439	NEDD4L;EZH2;CUX2;RAP2A;YWHAH;SDC2	1.01% (1/99)	0.025087	1.6	NA	NA
11	7.89	GO:0031102	neuron projection regeneration	The regrowth of neuronal processes such as axons or dendrites in response to their loss or damage.	24.138% (14/58)	0.0746147	1.13	NA	NA	8.621% (5/58)	0.0221883	1.65	NA	NA	0% (0/58)	0.00891385	2.05	NA	NA	1.724% (1/58)	0.00575765	2.24	ENSG00000183762	KREMEN1	1.724% (1/58)	0.0177151	1.75	NA	NA
11	6.23	GO:0016358	dendrite development	The process whose specific outcome is the progression of the dendrite over time, from its formation to the mature structure.	17.227% (41/238)	0.205623	0.69	NA	NA	4.202% (10/238)	0.00068619	3.16	ENSG00000068305;ENSG00000099250;ENSG00000100320;ENSG00000107954;ENSG00000157193;ENSG00000162946;ENSG00000165704;ENSG00000169862;ENSG00000175866;ENSG00000197959	MEF2A;NRP1;RBFOX2;NEURL1;LRP8;DISC1;HPRT1;CTNND2;BAIAP2;DNM3	0.42% (1/238)	0.0330314	1.48	NA	NA	3.361% (8/238)	0.0746292	1.13	NA	NA	1.681% (4/238)	0.0479773	1.32	NA	NA
11	4.53	GO:0031175	neuron projection development	The process whose specific outcome is the progression of a neuron projection over time, from its formation to the mature structure. A neuron projection is any process extending from a neural cell, such as axons or dendrites (collectively called neurites).	17.769% (180/1013)	0.0230277	1.64	NA	NA	4.738% (48/1013)	0.0113872	1.94	NA	NA	0.296% (3/1013)	0.0126396	1.9	NA	NA	2.863% (29/1013)	0.000591811	3.23	ENSG00000011201;ENSG00000047597;ENSG00000049759;ENSG00000091129;ENSG00000100320;ENSG00000106462;ENSG00000111249;ENSG00000112290;ENSG00000112335;ENSG00000114166;ENSG00000114999;ENSG00000124785;ENSG00000125249;ENSG00000128245;ENSG00000132386;ENSG00000134909;ENSG00000141622;ENSG00000143545;ENSG00000149557;ENSG00000150093;ENSG00000152332;ENSG00000157404;ENSG00000169439;ENSG00000183690;ENSG00000183691…	ANOS1;XK;NEDD4L;NRCAM;RBFOX2;EZH2;CUX2;WASF1;SNX3;KAT2B;TTL;NRN1;RAP2A;YWHAH;SERPINF1;ARHGAP32;ARK2C;RAB13;FEZ1;ITGB1;UHMK1;KIT;SDC2;EFHC2;NOG;KREMEN1;FAT4;TCTN1;ERCC6	1.185% (12/1013)	0.00163807	2.79	ENSG00000077327;ENSG00000081189;ENSG00000091129;ENSG00000103528;ENSG00000114315;ENSG00000125249;ENSG00000134909;ENSG00000134986;ENSG00000139174;ENSG00000141622;ENSG00000150093;ENSG00000184349	SPAG6;MEF2C;NRCAM;SYT17;HES1;RAP2A;ARHGAP32;NREP;PRICKLE1;ARK2C;ITGB1;EFNA5
11	8.1	GO:0030517	negative regulation of axon extension	Any process that stops, prevents, or reduces the frequency, rate or extent of axon outgrowth.	14.894% (7/47)	9.26e-05	4.03	ENSG00000105426;ENSG00000108379;ENSG00000115310;ENSG00000137261;ENSG00000138623;ENSG00000163462;ENSG00000167680	PTPRS;WNT3;RTN4;KIAA0319;SEMA7A;TRIM46;SEMA6B	6.383% (3/47)	0.000647611	3.19	ENSG00000010319;ENSG00000099250;ENSG00000167680	SEMA3G;NRP1;SEMA6B	0% (0/47)	9.09e-05	4.04	NA	NA	0% (0/47)	6.66e-05	4.18	NA	NA	0% (0/47)	8.59e-05	4.07	NA	NA
11	10.11	GO:0050774	negative regulation of dendrite morphogenesis	Any process that stops, prevents, or reduces the frequency, rate or extent of dendrite morphogenesis.	0% (0/8)	0.00563124	2.25	NA	NA	0% (0/8)	0.0201898	1.69	NA	NA	0% (0/8)	0.0263169	1.58	NA	NA	12.5% (1/8)	0.0788154	1.1	NA	NA	0% (0/8)	0.0253008	1.6	NA	NA
11	7.82	GO:0048814	regulation of dendrite morphogenesis	Any process that modulates the frequency, rate or extent of dendrite morphogenesis.	17.188% (11/64)	0.127731	0.89	NA	NA	3.125% (2/64)	0.00032572	3.49	ENSG00000157193;ENSG00000175866	LRP8;BAIAP2	0% (0/64)	0.000746214	3.13	NA	NA	7.812% (5/64)	0.0135897	1.87	NA	NA	1.562% (1/64)	0.00167833	2.78	ENSG00000125249	RAP2A
11	6.64	GO:1990138	neuron projection extension	NA	18.785% (34/181)	0.00646972	2.19	ENSG00000043143;ENSG00000049759;ENSG00000067606;ENSG00000082701;ENSG00000085733;ENSG00000089057;ENSG00000090432;ENSG00000091129;ENSG00000101126;ENSG00000105426;ENSG00000105429;ENSG00000107758;ENSG00000108379;ENSG00000110321;ENSG00000112290;ENSG00000114999;ENSG00000115310;ENSG00000115414;ENSG00000124785;ENSG00000134909;ENSG00000137261;ENSG00000138623;ENSG00000147894;ENSG00000150093;ENSG00000155256…	JADE2;NEDD4L;PRKCZ;GSK3B;CTTN;SLC23A2;MUL1;NRCAM;ADNP;PTPRS;MEGF8;PPP3CB;WNT3;EIF4G2;WASF1;TTL;RTN4;FN1;NRN1;ARHGAP32;KIAA0319;SEMA7A;C9orf72;ITGB1;ZFYVE27;DISC1;TRIM46;SEMA6B;CTNNB1;RAPH1;SLIT3;BMPR2;DDR1;CPNE1	5.525% (10/181)	0.00906388	2.04	ENSG00000010319;ENSG00000085733;ENSG00000091129;ENSG00000099250;ENSG00000103528;ENSG00000124205;ENSG00000134909;ENSG00000162946;ENSG00000167680;ENSG00000221866	SEMA3G;CTTN;NRCAM;NRP1;SYT17;EDN3;ARHGAP32;DISC1;SEMA6B;PLXNA4	0.552% (1/181)	0.00192912	2.71	ENSG00000198399	ITSN2	3.867% (7/181)	0.00231682	2.64	ENSG00000049759;ENSG00000091129;ENSG00000112290;ENSG00000114999;ENSG00000124785;ENSG00000134909;ENSG00000150093	NEDD4L;NRCAM;WASF1;TTL;NRN1;ARHGAP32;ITGB1	3.315% (6/181)	0.00233731	2.63	ENSG00000077327;ENSG00000091129;ENSG00000103528;ENSG00000134909;ENSG00000139174;ENSG00000150093	SPAG6;NRCAM;SYT17;ARHGAP32;PRICKLE1;ITGB1
11	8.54	GO:0097484	dendrite extension	Long distance growth of a single dendrite involved in cellular development.	11.111% (4/36)	0.0153354	1.81	NA	NA	2.778% (1/36)	0.00756289	2.12	ENSG00000103528	SYT17	2.778% (1/36)	0.00456387	2.34	ENSG00000198399	ITSN2	5.556% (2/36)	0.0239865	1.62	NA	NA	2.778% (1/36)	0.0119695	1.92	NA	NA
11	6.1	GO:0007411	axon guidance	The chemotaxis process that directs the migration of an axon growth cone to a specific target site in response to a combination of attractive and repulsive cues.	13.765% (34/247)	6.78e-05	4.17	ENSG00000007372;ENSG00000011201;ENSG00000077254;ENSG00000090776;ENSG00000091129;ENSG00000105426;ENSG00000105429;ENSG00000108379;ENSG00000112655;ENSG00000114391;ENSG00000115904;ENSG00000136040;ENSG00000138623;ENSG00000141622;ENSG00000143869;ENSG00000148357;ENSG00000149557;ENSG00000149658;ENSG00000151490;ENSG00000151694;ENSG00000154928;ENSG00000157404;ENSG00000162614;ENSG00000167680;ENSG00000170340…	PAX6;ANOS1;USP33;EFNB1;NRCAM;PTPRS;MEGF8;WNT3;PTK7;RPL24;SOS1;PLXNC1;SEMA7A;ARK2C;GDF7;HMCN2;FEZ1;YTHDF1;PTPRO;ADAM17;EPHB1;KIT;NEXN;SEMA6B;B3GNT2;EMB;BDNF;UNC5C;CSF1R;NOG;SLIT3;SIAH1;NTRK1;BMPR2	5.668% (14/247)	0.00183262	2.74	ENSG00000010319;ENSG00000011201;ENSG00000091129;ENSG00000099250;ENSG00000112655;ENSG00000115904;ENSG00000124205;ENSG00000129116;ENSG00000166450;ENSG00000167680;ENSG00000170571;ENSG00000183691;ENSG00000196569;ENSG00000221866	SEMA3G;ANOS1;NRCAM;NRP1;PTK7;SOS1;EDN3;PALLD;PRTG;SEMA6B;EMB;NOG;LAMA2;PLXNA4	0.405% (1/247)	0.000172899	3.76	ENSG00000112655	PTK7	2.429% (6/247)	0.000200974	3.7	ENSG00000011201;ENSG00000091129;ENSG00000141622;ENSG00000149557;ENSG00000157404;ENSG00000183691	ANOS1;NRCAM;ARK2C;FEZ1;KIT;NOG	1.215% (3/247)	0.000193574	3.71	ENSG00000091129;ENSG00000141622;ENSG00000184349	NRCAM;ARK2C;EFNA5
11	9.82	GO:0021785	branchiomotor neuron axon guidance	The process in which a branchiomotor neuron growth cone is directed to a specific target site. Branchiomotor neurons are located in the hindbrain and innervate branchial arch-derived muscles that control jaw movements, facial expression, the larynx, and the pharynx.	0% (0/7)	0.00841662	2.07	NA	NA	28.571% (2/7)	0.114991	0.94	NA	NA	0% (0/7)	0.0209291	1.68	NA	NA	0% (0/7)	0.0188695	1.72	NA	NA	0% (0/7)	0.0204684	1.69	NA	NA
11	6.86	GO:0048813	dendrite morphogenesis	The process in which the anatomical structures of a dendrite are generated and organized.	16.197% (23/142)	0.00986463	2.01	ENSG00000006740;ENSG00000049759;ENSG00000066032;ENSG00000068305;ENSG00000069869;ENSG00000073921;ENSG00000082701;ENSG00000100320;ENSG00000103319;ENSG00000110911;ENSG00000111249;ENSG00000113758;ENSG00000124006;ENSG00000125249;ENSG00000149930;ENSG00000150093;ENSG00000152767;ENSG00000154928;ENSG00000157193;ENSG00000161681;ENSG00000165704;ENSG00000169439;ENSG00000175866	ARHGAP44;NEDD4L;CTNNA2;MEF2A;NEDD4;PICALM;GSK3B;RBFOX2;EEF2K;SLC11A2;CUX2;DBN1;OBSL1;RAP2A;TAOK2;ITGB1;FARP1;EPHB1;LRP8;SHANK1;HPRT1;SDC2;BAIAP2	5.634% (8/142)	0.0288134	1.54	NA	NA	0% (0/142)	0.0029756	2.53	NA	NA	4.93% (7/142)	0.000764097	3.12	ENSG00000049759;ENSG00000100320;ENSG00000111249;ENSG00000125249;ENSG00000128245;ENSG00000150093;ENSG00000169439	NEDD4L;RBFOX2;CUX2;RAP2A;YWHAH;ITGB1;SDC2	1.408% (2/142)	0.00525969	2.28	ENSG00000125249;ENSG00000150093	RAP2A;ITGB1
11	5.4	GO:0007409	axonogenesis	De novo generation of a long process of a neuron, including the terminal branched region. Refers to the morphogenesis or creation of shape or form of the developing axon, which carries efferent (outgoing) action potentials from the cell body towards target cells.	15.767% (73/463)	0.0646968	1.19	NA	NA	4.968% (23/463)	0.0144619	1.84	NA	NA	0.216% (1/463)	0.00686085	2.16	ENSG00000112655	PTK7	2.376% (11/463)	0.00751396	2.12	ENSG00000011201;ENSG00000047597;ENSG00000091129;ENSG00000114999;ENSG00000134909;ENSG00000141622;ENSG00000149557;ENSG00000150093;ENSG00000157404;ENSG00000183691;ENSG00000204852	ANOS1;XK;NRCAM;TTL;ARHGAP32;ARK2C;FEZ1;ITGB1;KIT;NOG;TCTN1	1.296% (6/463)	0.0179359	1.75	NA	NA
12	10.51	GO:0055059	asymmetric neuroblast division	The process resulting in the physical partitioning and separation of a neuroblast into two daughter cells with different developmental potentials.	16.667% (1/6)	0.0315033	1.5	NA	NA	0% (0/6)	0.00614184	2.21	NA	NA	0% (0/6)	0.00733652	2.13	NA	NA	0% (0/6)	0.00653414	2.18	NA	NA	0% (0/6)	0.00715572	2.15	NA	NA
12	9.31	GO:0055057	neuroblast division	The process resulting in the physical partitioning and separation of a neuroblast into daughter cells. A neuroblast is any cell that will divide and give rise to a neuron.	20% (3/15)	0.00808717	2.09	ENSG00000066279;ENSG00000066468;ENSG00000084733	ASPM;FGFR2;RAB10	0% (0/15)	0.00886025	2.05	NA	NA	0% (0/15)	0.0119204	1.92	NA	NA	6.667% (1/15)	0.0592943	1.23	NA	NA	0% (0/15)	0.0114177	1.94	NA	NA
12	7.4	GO:0007405	neuroblast proliferation	The expansion of a neuroblast population by cell division. A neuroblast is any cell that will divide and give rise to a neuron.	17.073% (14/82)	0.0337923	1.47	NA	NA	6.098% (5/82)	0.0584284	1.23	NA	NA	0% (0/82)	0.00163023	2.79	NA	NA	4.878% (4/82)	0.0150051	1.82	NA	NA	1.22% (1/82)	0.00307793	2.51	ENSG00000150093	ITGB1
12	6.9	GO:0021782	glial cell development	The process aimed at the progression of a glial cell over time, from initial commitment of the cell to a specific fate, to the fully functional differentiated cell.	19.549% (26/133)	0.177157	0.75	NA	NA	5.263% (7/133)	0.0584792	1.23	NA	NA	0% (0/133)	0.0152166	1.82	NA	NA	0.752% (1/133)	0.00899238	2.05	ENSG00000143546	S100A8	0% (0/133)	0.0128021	1.89	NA	NA
12	7	GO:0048709	oligodendrocyte differentiation	The process in which a relatively unspecialized cell acquires the specialized features of an oligodendrocyte. An oligodendrocyte is a type of glial cell involved in myelinating the axons of neurons in the central nervous system.	16.822% (18/107)	0.0373301	1.43	NA	NA	2.804% (3/107)	0.00531869	2.27	ENSG00000123080;ENSG00000132170;ENSG00000146122	CDKN2C;PPARG;DAAM2	0% (0/107)	0.00232494	2.63	NA	NA	0% (0/107)	0.00100833	3	NA	NA	0.935% (1/107)	0.00381425	2.42	ENSG00000114315	HES1
12	6.06	GO:0010001	glial cell differentiation	The process in which a relatively unspecialized cell acquires the specialized features of a glial cell.	19.615% (51/260)	0.00721573	2.14	ENSG00000005513;ENSG00000007372;ENSG00000026025;ENSG00000038427;ENSG00000046653;ENSG00000066135;ENSG00000071127;ENSG00000100151;ENSG00000100678;ENSG00000100697;ENSG00000105810;ENSG00000106615;ENSG00000111361;ENSG00000111537;ENSG00000112414;ENSG00000115904;ENSG00000116478;ENSG00000123080;ENSG00000125538;ENSG00000130164;ENSG00000131095;ENSG00000132170;ENSG00000132470;ENSG00000133703;ENSG00000135919…	SOX8;PAX6;VIM;VCAN;GPM6B;KDM4A;WDR1;PICK1;SLC8A3;DICER1;CDK6;RHEB;EIF2B1;IFNG;ADGRG6;SOS1;HDAC1;CDKN2C;IL1B;LDLR;GFAP;PPARG;ITGB4;KRAS;SERPINE2;TLR2;MBD1;AKT1;S100A8;VPS54;EIF2B5;DAAM2;TENM4;IL34;SLC45A3;NFIA;S100A9;SPINT1;NAB2;CTNNB1;ROR2;ZEB2;CDK1;CDH2;MYD88;GPR157;NOG;ROR1;NF1;DMD;PPP3R1	6.538% (17/260)	0.12558	0.9	NA	NA	0% (0/260)	0.00867633	2.06	NA	NA	1.154% (3/260)	0.0200271	1.7	NA	NA	0.769% (2/260)	0.0112924	1.95	NA	NA
12	5.69	GO:0042063	gliogenesis	The process that results in the generation of glial cells. This includes the production of glial progenitors and their differentiation into mature glia.	19.364% (67/346)	0.116879	0.93	NA	NA	7.225% (25/346)	0.110291	0.96	NA	NA	0% (0/346)	0.0671706	1.17	NA	NA	1.734% (6/346)	0.00779939	2.11	ENSG00000106462;ENSG00000116678;ENSG00000138685;ENSG00000143546;ENSG00000147883;ENSG00000183691	EZH2;LEPR;FGF2;S100A8;CDKN2B;NOG	0.867% (3/346)	0.00173264	2.76	ENSG00000114315;ENSG00000133424;ENSG00000172232	HES1;LARGE1;AZU1
12	10.23	GO:0021521	ventral spinal cord interneuron specification	The process in which a cell becomes capable of differentiating autonomously into a ventral spinal cord interneuron in an environment that is neutral with respect to the developmental pathway.	0% (0/7)	0.00111071	2.95	NA	NA	0% (0/7)	0.00196527	2.71	NA	NA	0% (0/7)	0.00218311	2.66	NA	NA	0% (0/7)	0.00202146	2.69	NA	NA	0% (0/7)	0.00214719	2.67	NA	NA
12	9.42	GO:0048935	peripheral nervous system neuron development	The process whose specific outcome is the progression of a neuron whose cell body is located in the peripheral nervous system, from initial commitment of the cell to a neuronal fate, to the fully functional differentiated neuron.	0% (0/14)	0.000485989	3.31	NA	NA	0% (0/14)	0.00439199	2.36	NA	NA	0% (0/14)	0.00694099	2.16	NA	NA	0% (0/14)	0.00504422	2.3	NA	NA	0% (0/14)	0.00651344	2.19	NA	NA
12	8.15	GO:0008038	neuron recognition	The process in which a neuronal cell in a multicellular organism interprets its surroundings.	11.111% (5/45)	0.00591704	2.23	ENSG00000091129;ENSG00000105429;ENSG00000115310;ENSG00000162614;ENSG00000170571	NRCAM;MEGF8;RTN4;NEXN;EMB	8.889% (4/45)	0.110553	0.96	NA	NA	0% (0/45)	0.0121351	1.92	NA	NA	2.222% (1/45)	0.014972	1.82	NA	NA	2.222% (1/45)	0.0247954	1.61	NA	NA
12	4.37	GO:0048666	neuron development	The process whose specific outcome is the progression of a neuron over time, from initial commitment of the cell to a specific fate, to the fully functional differentiated cell.	17.986% (209/1162)	0.0548439	1.26	NA	NA	4.905% (57/1162)	0.00662932	2.18	ENSG00000009694;ENSG00000010319;ENSG00000011201;ENSG00000057657;ENSG00000068305;ENSG00000079215;ENSG00000081479;ENSG00000085733;ENSG00000091129;ENSG00000092200;ENSG00000095464;ENSG00000099250;ENSG00000100320;ENSG00000103528;ENSG00000107290;ENSG00000107954;ENSG00000112655;ENSG00000115904;ENSG00000116044;ENSG00000118515;ENSG00000124205;ENSG00000126861;ENSG00000129116;ENSG00000129757;ENSG00000134909…	TENM1;SEMA3G;ANOS1;PRDM1;MEF2A;SLC1A3;LRP2;CTTN;NRCAM;RPGRIP1;PDE6C;NRP1;RBFOX2;SYT17;SETX;NEURL1;PTK7;SOS1;NFE2L2;SGK1;EDN3;OMG;PALLD;CDKN1C;ARHGAP32;STXBP1;RTCA;SLC4A10;PTPRG;ADM;GPM6A;LRP8;DISC1;S100A9;HPRT1;PRTG;HDGFL3;SEMA6B;MINAR1;CTNND2;CDH2;EMB;CABP4;BAIAP2;GATA2;SLITRK4;NOG;KREMEN1;ROR1;FAT4;LAMA2;DNM3;TCTN1;ITGA1;PLXNA4;ERCC6;NEFL	0.258% (3/1162)	0.00345345	2.46	ENSG00000081189;ENSG00000112655;ENSG00000198399	MEF2C;PTK7;ITSN2	2.926% (34/1162)	0.0696966	1.16	NA	NA	1.205% (14/1162)	0.0461733	1.34	NA	NA
12	9.01	GO:1904948	midbrain dopaminergic neuron differentiation	NA	12.5% (2/16)	0.00542054	2.27	ENSG00000108379;ENSG00000168036	WNT3;CTNNB1	0% (0/16)	0.00695413	2.16	NA	NA	0% (0/16)	0.0113785	1.94	NA	NA	0% (0/16)	0.00805599	2.09	NA	NA	0% (0/16)	0.0106101	1.97	NA	NA
12	6.59	GO:0021953	central nervous system neuron differentiation	The process in which a relatively unspecialized cell acquires specialized features of a neuron whose cell body resides in the central nervous system.	11.05% (20/181)	0.0032977	2.48	ENSG00000007372;ENSG00000066468;ENSG00000122641;ENSG00000130449;ENSG00000135049;ENSG00000136021;ENSG00000138002;ENSG00000139197;ENSG00000143869;ENSG00000144290;ENSG00000146109;ENSG00000154928;ENSG00000162946;ENSG00000165704;ENSG00000166710;ENSG00000170390;ENSG00000179348;ENSG00000182578;ENSG00000204120;ENSG00000204852	PAX6;FGFR2;INHBA;ZSWIM6;AGTPBP1;SCYL2;IFT172;PEX5;GDF7;SLC4A10;ABT1;EPHB1;DISC1;HPRT1;B2M;DCLK2;GATA2;CSF1R;GIGYF2;TCTN1	3.867% (7/181)	0.0329477	1.48	NA	NA	0% (0/181)	0.031247	1.51	NA	NA	1.657% (3/181)	0.0217536	1.66	NA	NA	1.105% (2/181)	0.0540998	1.27	NA	NA
12	7.96	GO:0071542	dopaminergic neuron differentiation	The process in which a neuroblast acquires the specialized structural and functional features of a dopaminergic neuron, a neuron that secretes dopamine.	9.524% (4/42)	0.00147296	2.83	ENSG00000082701;ENSG00000108379;ENSG00000165704;ENSG00000168036	GSK3B;WNT3;HPRT1;CTNNB1	2.381% (1/42)	0.00690179	2.16	ENSG00000165704	HPRT1	0% (0/42)	9.56e-05	4.02	NA	NA	0% (0/42)	0.00242814	2.61	NA	NA	0% (0/42)	8.17e-05	4.09	NA	NA
12	4.05	GO:0030182	neuron differentiation	The process in which a relatively unspecialized cell acquires specialized features of a neuron.	18.093% (258/1426)	0.0309517	1.51	NA	NA	4.348% (62/1426)	6.23e-05	4.21	ENSG00000009694;ENSG00000010319;ENSG00000011201;ENSG00000055732;ENSG00000057657;ENSG00000068305;ENSG00000079215;ENSG00000081479;ENSG00000085733;ENSG00000091129;ENSG00000092200;ENSG00000095464;ENSG00000099250;ENSG00000100320;ENSG00000102038;ENSG00000103528;ENSG00000107290;ENSG00000107954;ENSG00000108576;ENSG00000112655;ENSG00000115904;ENSG00000116044;ENSG00000118515;ENSG00000120833;ENSG00000124205…	TENM1;SEMA3G;ANOS1;MCOLN3;PRDM1;MEF2A;SLC1A3;LRP2;CTTN;NRCAM;RPGRIP1;PDE6C;NRP1;RBFOX2;SMARCA1;SYT17;SETX;NEURL1;SLC6A4;PTK7;SOS1;NFE2L2;SGK1;SOCS2;EDN3;OMG;PALLD;CDKN1C;ARHGAP32;STXBP1;RTCA;SLC4A10;PTPRG;ADM;GPM6A;LRP8;DISC1;S100A9;HPRT1;PRTG;HDGFL3;SEMA6B;MINAR1;CTNND2;CDH2;EMB;CABP4;BAIAP2;GATA2;SLITRK4;NOG;KREMEN1;ROR1;FAT4;LAMA2;DNM3;ZNF521;TCTN1;ITGA1;PLXNA4;ERCC6;NEFL	0.21% (3/1426)	0.000874205	3.06	ENSG00000081189;ENSG00000112655;ENSG00000198399	MEF2C;PTK7;ITSN2	2.735% (39/1426)	0.00230635	2.64	ENSG00000011201;ENSG00000047597;ENSG00000049759;ENSG00000055732;ENSG00000066279;ENSG00000079215;ENSG00000091129;ENSG00000092200;ENSG00000100320;ENSG00000106462;ENSG00000111249;ENSG00000112290;ENSG00000112335;ENSG00000114166;ENSG00000114999;ENSG00000122641;ENSG00000124785;ENSG00000125249;ENSG00000128245;ENSG00000132386;ENSG00000134909;ENSG00000138685;ENSG00000141622;ENSG00000143545;ENSG00000144290…	ANOS1;XK;NEDD4L;MCOLN3;ASPM;SLC1A3;NRCAM;RPGRIP1;RBFOX2;EZH2;CUX2;WASF1;SNX3;KAT2B;TTL;INHBA;NRN1;RAP2A;YWHAH;SERPINF1;ARHGAP32;FGF2;ARK2C;RAB13;SLC4A10;UGCG;FEZ1;ITGB1;UHMK1;KIT;FZD5;SDC2;EFHC2;NOG;KREMEN1;GLDN;FAT4;TCTN1;ERCC6	1.052% (15/1426)	0.00135206	2.87	ENSG00000077327;ENSG00000081189;ENSG00000091129;ENSG00000103528;ENSG00000114315;ENSG00000122641;ENSG00000125249;ENSG00000129757;ENSG00000134909;ENSG00000134986;ENSG00000139174;ENSG00000141622;ENSG00000150093;ENSG00000184349;ENSG00000186417	SPAG6;MEF2C;NRCAM;SYT17;HES1;INHBA;RAP2A;CDKN1C;ARHGAP32;NREP;PRICKLE1;ARK2C;ITGB1;EFNA5;GLDN
13	8.54	GO:0035886	vascular associated smooth muscle cell differentiation	The process in which a relatively unspecialized cell acquires specialized features of a vascular smooth muscle cell.	10.714% (3/28)	0.000964546	3.02	ENSG00000072736;ENSG00000148926;ENSG00000157404	NFATC3;ADM;KIT	7.143% (2/28)	0.00593823	2.23	ENSG00000134817;ENSG00000148926	APLNR;ADM	0% (0/28)	0.000891848	3.05	NA	NA	3.571% (1/28)	0.00129943	2.89	ENSG00000157404	KIT	3.571% (1/28)	0.0030935	2.51	ENSG00000114315	HES1
13	6.89	GO:0014902	myotube differentiation	The process in which a relatively unspecialized cell acquires specialized features of a myotube cell. Myotube differentiation starts with myoblast fusion and the appearance of specific cell markers (this is the cell development step). Then individual myotubes can fuse to form bigger myotubes and start to contract. Myotubes are multinucleated cells that are formed when proliferating myoblasts exit…	11.45% (15/131)	0.00327552	2.48	ENSG00000023902;ENSG00000047597;ENSG00000068024;ENSG00000077238;ENSG00000107758;ENSG00000112062;ENSG00000113520;ENSG00000130513;ENSG00000136999;ENSG00000150093;ENSG00000150760;ENSG00000162909;ENSG00000176697;ENSG00000196218;ENSG00000198947	PLEKHO1;XK;HDAC4;IL4R;PPP3CB;MAPK14;IL4;GDF15;CCN3;ITGB1;DOCK1;CAPN2;BDNF;RYR1;DMD	5.344% (7/131)	0.0492904	1.31	NA	NA	0.763% (1/131)	0.0963972	1.02	NA	NA	3.053% (4/131)	0.0217506	1.66	NA	NA	2.29% (3/131)	0.182584	0.74	NA	NA
13	5.98	GO:0051146	striated muscle cell differentiation	The process in which a relatively unspecialized cell acquires specialized features of a striated muscle cell; striated muscle fibers are divided by transverse bands into striations, and cardiac and voluntary muscle are types of striated muscle.	12.287% (36/293)	0.0664242	1.18	NA	NA	5.461% (16/293)	0.000434362	3.36	ENSG00000023902;ENSG00000068024;ENSG00000068305;ENSG00000105048;ENSG00000112062;ENSG00000113520;ENSG00000115170;ENSG00000130513;ENSG00000134247;ENSG00000151320;ENSG00000155657;ENSG00000157168;ENSG00000162909;ENSG00000170558;ENSG00000187955;ENSG00000198796	PLEKHO1;HDAC4;MEF2A;TNNT1;MAPK14;IL4;ACVR1;GDF15;PTGFRN;AKAP6;TTN;NRG1;CAPN2;CDH2;COL14A1;ALPK2	0.683% (2/293)	0.000378469	3.42	ENSG00000081189;ENSG00000128872	MEF2C;TMOD2	2.73% (8/293)	0.000161453	3.79	ENSG00000047597;ENSG00000106462;ENSG00000112062;ENSG00000130513;ENSG00000140416;ENSG00000150093;ENSG00000151320;ENSG00000157168	XK;EZH2;MAPK14;GDF15;TPM1;ITGB1;AKAP6;NRG1	1.706% (5/293)	0.00230244	2.64	ENSG00000081189;ENSG00000133424;ENSG00000139174;ENSG00000150093;ENSG00000151320	MEF2C;LARGE1;PRICKLE1;ITGB1;AKAP6
13	9.36	GO:0042693	muscle cell fate commitment	The process in which the cellular identity of muscle cells is acquired and determined.	6.25% (1/16)	0.00834688	2.08	ENSG00000115170	ACVR1	6.25% (1/16)	0.0280543	1.55	NA	NA	6.25% (1/16)	0.0359951	1.44	NA	NA	0% (0/16)	0.00720595	2.14	NA	NA	6.25% (1/16)	0.0346458	1.46	NA	NA
13	7.63	GO:0051145	smooth muscle cell differentiation	The process in which a relatively unspecialized cell acquires specialized features of a smooth muscle cell; smooth muscle lacks transverse striations in its constituent fibers and are almost always involuntary.	14.062% (9/64)	0.0241333	1.62	NA	NA	6.25% (4/64)	0.0647889	1.19	NA	NA	1.562% (1/64)	0.0816167	1.09	NA	NA	3.125% (2/64)	0.00499448	2.3	ENSG00000082014;ENSG00000157404	SMARCD3;KIT	3.125% (2/64)	0.0788648	1.1	NA	NA
13	6.48	GO:0055001	muscle cell development	The process whose specific outcome is the progression of a muscle cell over time, from its formation to the mature structure. Muscle cell development does not include the steps involved in committing an unspecified cell to the muscle cell fate.	13.158% (25/190)	0.160924	0.79	NA	NA	5.263% (10/190)	0.0202968	1.69	NA	NA	0.526% (1/190)	0.0148702	1.83	NA	NA	2.632% (5/190)	0.0171458	1.77	NA	NA	2.632% (5/190)	0.00117164	2.93	ENSG00000114315;ENSG00000133424;ENSG00000139174;ENSG00000150093;ENSG00000151320	HES1;LARGE1;PRICKLE1;ITGB1;AKAP6
13	5.97	GO:0045165	cell fate commitment	The cellular developmental process by which a cell establishes the intrinsic character of a cell or tissue region irreversibly committing it to a particular fate.	11.458% (33/288)	0.000102129	3.99	ENSG00000002745;ENSG00000005513;ENSG00000006712;ENSG00000007372;ENSG00000057657;ENSG00000066468;ENSG00000084733;ENSG00000101384;ENSG00000102054;ENSG00000106799;ENSG00000108379;ENSG00000115170;ENSG00000116016;ENSG00000116478;ENSG00000131023;ENSG00000132170;ENSG00000137815;ENSG00000143869;ENSG00000149256;ENSG00000149480;ENSG00000150093;ENSG00000156127;ENSG00000162434;ENSG00000162599;ENSG00000166888…	WNT16;SOX8;PAF1;PAX6;PRDM1;FGFR2;RAB10;JAG1;RBBP7;TGFBR1;WNT3;ACVR1;EPAS1;HDAC1;LATS1;PPARG;RTF1;GDF7;TENM4;MTA2;ITGB1;BATF;JAK1;NFIA;STAT6;CTNNB1;GATA2;SOCS3;MITF;CTR9;ZNF521;EHMT2;MIAT	3.472% (10/288)	0.00316686	2.5	ENSG00000049768;ENSG00000057657;ENSG00000099250;ENSG00000115170;ENSG00000132170;ENSG00000162434;ENSG00000179348;ENSG00000184557;ENSG00000198795;ENSG00000225783	FOXP3;PRDM1;NRP1;ACVR1;PPARG;JAK1;GATA2;SOCS3;ZNF521;MIAT	0.347% (1/288)	0.000308032	3.51	ENSG00000081189	MEF2C	1.042% (3/288)	0.000461634	3.34	ENSG00000138685;ENSG00000150093;ENSG00000162434	FGF2;ITGB1;JAK1	1.042% (3/288)	0.000555764	3.26	ENSG00000081189;ENSG00000114315;ENSG00000150093	MEF2C;HES1;ITGB1
13	7.14	GO:0001708	cell fate specification	The cellular developmental process involved in cell fate commitment in which the cell is designated to follow a developmental path, unless they receive extrinsic cues that direct an alternative fate.	9.091% (10/110)	0.0274734	1.56	NA	NA	1.818% (2/110)	0.00802338	2.1	ENSG00000099250;ENSG00000225783	NRP1;MIAT	0% (0/110)	0.0158402	1.8	NA	NA	1.818% (2/110)	0.0208349	1.68	NA	NA	0.909% (1/110)	0.0232976	1.63	NA	NA
13	6.29	GO:0045444	fat cell differentiation	The process in which a relatively unspecialized cell acquires specialized features of an adipocyte, an animal connective tissue cell specialized for the synthesis and storage of fat.	13.136% (31/236)	0.0362787	1.44	NA	NA	3.39% (8/236)	0.0394313	1.4	NA	NA	0% (0/236)	0.0400865	1.4	NA	NA	1.271% (3/236)	0.0278568	1.56	NA	NA	0.424% (1/236)	0.00318242	2.5	ENSG00000114315	HES1
13	2.73	GO:0030154	cell differentiation	The cellular developmental process in which a relatively unspecialized cell, e.g. embryonic or regenerative cell, acquires specialized structural and/or functional features that characterize a specific cell. Differentiation includes the processes involved in commitment of a cell to a specific fate and its subsequent development to the mature state.	16.013% (698/4359)	0.000571581	3.24	ENSG00000002745;ENSG00000004487;ENSG00000004939;ENSG00000005022;ENSG00000005108;ENSG00000005194;ENSG00000005513;ENSG00000006607;ENSG00000006712;ENSG00000006740;ENSG00000007372;ENSG00000007944;ENSG00000008083;ENSG00000008438;ENSG00000009694;ENSG00000010361;ENSG00000010671;ENSG00000011143;ENSG00000011198;ENSG00000011201;ENSG00000011304;ENSG00000011426;ENSG00000012223;ENSG00000019582;ENSG00000020256…	WNT16;KDM1A;SLC4A1;SLC25A5;THSD7A;CIAPIN1;SOX8;FARP2;PAF1;ARHGAP44;PAX6;MYLIP;JARID2;PGLYRP1;TENM1;FUZ;BTK;MKS1;ABHD5;ANOS1;PTBP1;ANLN;LTF;CD74;ZFP64;STRAP;PLEKHO1;NR1H3;NCAPH2;VIM;TBPL1;SLC4A7;NSUN2;VCAN;JADE2;ADRB1;GPM6B;XK;NEDD4L;FSTL4;EIF2AK2;MCOLN3;RC3H2;PRDM1;PITHD1;RASGRF1;DGKG;WNK1;LTK;SPEN;CDK13;CTNNA2;TIE1;KDM4A;ASPM;FGFR2;ZFAT;FECH;KLF6;PRKCZ;ROCK1;HDAC4;MEF2A;ACSL4;PSME4;NUP133;NEDD4;…	4.336% (189/4359)	0.00465473	2.33	ENSG00000005108;ENSG00000008083;ENSG00000009694;ENSG00000010319;ENSG00000011201;ENSG00000012223;ENSG00000023902;ENSG00000038295;ENSG00000038427;ENSG00000049768;ENSG00000055332;ENSG00000055732;ENSG00000057657;ENSG00000068024;ENSG00000068305;ENSG00000078747;ENSG00000078804;ENSG00000079215;ENSG00000081479;ENSG00000082014;ENSG00000085733;ENSG00000086065;ENSG00000091129;ENSG00000091436;ENSG00000092200…	THSD7A;JARID2;TENM1;SEMA3G;ANOS1;LTF;PLEKHO1;TLL1;VCAN;FOXP3;EIF2AK2;MCOLN3;PRDM1;HDAC4;MEF2A;ITCH;TP53INP2;SLC1A3;LRP2;SMARCD3;CTTN;CHMP5;NRCAM;MAP3K20;RPGRIP1;PDE6C;SRPK1;NRP1;RBFOX2;SMARCA1;TNFSF13B;HSF4;SYT17;TRPS1;ASF1B;TNNT1;CDK6;ITGB8;TNFSF8;SETX;NEURL1;SLC6A4;HLF;MAP2K6;LTA4H;SLC26A8;MAPK14;VNN1;ADGRG6;PTK7;PDE4D;IL4;ACVR1;SOS1;NFE2L2;MMP8;SGK1;ALDH6A1;TEK;SOCS2;TRIM6;CD80;CCR2;ACVR2A;CDK…	0.206% (9/4359)	0.00202651	2.69	ENSG00000081189;ENSG00000082293;ENSG00000112655;ENSG00000128872;ENSG00000137824;ENSG00000142798;ENSG00000156738;ENSG00000186716;ENSG00000198399	MEF2C;COL19A1;PTK7;TMOD2;RMDN3;HSPG2;MS4A1;BCR;ITSN2	2.34% (102/4359)	0.00293937	2.53	ENSG00000011201;ENSG00000011426;ENSG00000012223;ENSG00000028839;ENSG00000047597;ENSG00000049759;ENSG00000055732;ENSG00000056586;ENSG00000065883;ENSG00000066279;ENSG00000072274;ENSG00000079215;ENSG00000082014;ENSG00000088986;ENSG00000091129;ENSG00000091436;ENSG00000092200;ENSG00000096063;ENSG00000100320;ENSG00000101412;ENSG00000104447;ENSG00000106462;ENSG00000108984;ENSG00000109906;ENSG00000110723…	ANOS1;ANLN;LTF;TBPL1;XK;NEDD4L;MCOLN3;RC3H2;CDK13;ASPM;TFRC;SLC1A3;SMARCD3;DYNLL1;NRCAM;MAP3K20;RPGRIP1;SRPK1;RBFOX2;E2F1;TRPS1;EZH2;MAP2K6;ZBTB16;EXPH5;LTA4H;CUX2;SLC26A8;MAPK14;RHAG;WASF1;SNX3;KAT2B;TTL;LEPR;MMP8;PGF;INHBA;CIT;NRN1;RAP2A;YWHAH;ASH2L;GDF15;TOP2A;SERPINF1;BEX1;PIWIL4;ARHGAP32;CD36;ABCB10;EDAR;IL10;KNL1;FGF2;TPM1;ARK2C;RAB13;S100A8;SLC4A10;SRD5A1;DIAPH2;MFHAS1;CDKN2B;CDKN2A;UGCG;F…	0.78% (34/4359)	0.0124661	1.9	NA	NA
13	6.35	GO:0048863	stem cell differentiation	The process in which a relatively unspecialized cell acquires specialized features of a stem cell. A stem cell is a cell that retains the ability to divide and proliferate throughout life to provide progenitor cells that can differentiate into specialized cells.	21.311% (52/244)	0.0759524	1.12	NA	NA	6.557% (16/244)	0.000283759	3.55	ENSG00000008083;ENSG00000010319;ENSG00000055332;ENSG00000078747;ENSG00000099250;ENSG00000105810;ENSG00000112062;ENSG00000115170;ENSG00000116044;ENSG00000121236;ENSG00000124205;ENSG00000150625;ENSG00000157168;ENSG00000167680;ENSG00000170558;ENSG00000183691	JARID2;SEMA3G;EIF2AK2;ITCH;NRP1;CDK6;MAPK14;ACVR1;NFE2L2;TRIM6;EDN3;GPM6A;NRG1;SEMA6B;CDH2;NOG	0.41% (1/244)	3.42e-06	5.47	ENSG00000081189	MEF2C	3.279% (8/244)	0.000328937	3.48	ENSG00000065883;ENSG00000106462;ENSG00000112062;ENSG00000138685;ENSG00000150093;ENSG00000157168;ENSG00000157404;ENSG00000183691	CDK13;EZH2;MAPK14;FGF2;ITGB1;NRG1;KIT;NOG	1.639% (4/244)	0.000345902	3.46	ENSG00000081189;ENSG00000114315;ENSG00000139174;ENSG00000150093	MEF2C;HES1;PRICKLE1;ITGB1
13	7.45	GO:0002067	glandular epithelial cell differentiation	The process in which a relatively unspecialized cell acquires specialized features of a glandular epithelial cell. A glandular epithelial cell is a columnar/cuboidal epithelial cell found in a two dimensional sheet with a free surface exposed to the lumen of a gland.	13.889% (10/72)	0.00201849	2.69	ENSG00000007372;ENSG00000066468;ENSG00000082701;ENSG00000105810;ENSG00000106615;ENSG00000142208;ENSG00000163251;ENSG00000168036;ENSG00000170558;ENSG00000179348	PAX6;FGFR2;GSK3B;CDK6;RHEB;AKT1;FZD5;CTNNB1;CDH2;GATA2	4.167% (3/72)	0.00192096	2.72	ENSG00000105810;ENSG00000170558;ENSG00000179348	CDK6;CDH2;GATA2	0% (0/72)	0.00154795	2.81	NA	NA	2.778% (2/72)	0.00319017	2.5	ENSG00000138685;ENSG00000163251	FGF2;FZD5	1.389% (1/72)	0.0029204	2.53	ENSG00000114315	HES1
13	6.6	GO:0002064	epithelial cell development	The process whose specific outcome is the progression of an epithelial cell over time, from its formation to the mature structure. An epithelial cell is a cell usually found in a two-dimensional sheet with a free surface.	17.593% (38/216)	0.00307096	2.51	ENSG00000005513;ENSG00000007372;ENSG00000026025;ENSG00000057657;ENSG00000067900;ENSG00000082701;ENSG00000085662;ENSG00000101384;ENSG00000102531;ENSG00000105426;ENSG00000105810;ENSG00000106392;ENSG00000106615;ENSG00000110723;ENSG00000116016;ENSG00000116473;ENSG00000123728;ENSG00000125538;ENSG00000127314;ENSG00000133835;ENSG00000134318;ENSG00000136068;ENSG00000136160;ENSG00000142208;ENSG00000142627…	SOX8;PAX6;VIM;PRDM1;ROCK1;GSK3B;AKR1B1;JAG1;FNDC3A;PTPRS;CDK6;C1GALT1;RHEB;EXPH5;EPAS1;RAP1A;RAP2C;IL1B;RAP1B;HSD17B4;ROCK2;FLNB;EDNRB;AKT1;EPHA2;RAB13;FZD5;SPINT2;CLIC4;CDH2;MYD88;HPSE;GATA2;YIPF6;NTRK1;DMD;S1PR3;PECAM1	4.63% (10/216)	0.000291163	3.54	ENSG00000049768;ENSG00000057657;ENSG00000105810;ENSG00000113448;ENSG00000129116;ENSG00000136068;ENSG00000164488;ENSG00000170558;ENSG00000172936;ENSG00000179348	FOXP3;PRDM1;CDK6;PDE4D;PALLD;FLNB;DACT2;CDH2;MYD88;GATA2	0% (0/216)	4.52e-05	4.34	NA	NA	1.389% (3/216)	0.00152523	2.82	ENSG00000110723;ENSG00000143545;ENSG00000163251	EXPH5;RAB13;FZD5	0% (0/216)	0.00160904	2.79	NA	NA
13	8.03	GO:0002066	columnar/cuboidal epithelial cell development	The process whose specific outcome is the progression of a columnar/cuboidal epithelial cell over time, from its formation to the mature structure. A columnar/cuboidal epithelial cell is a cell usually found in a two dimensional sheet with a free surface. Columnar/cuboidal epithelial cells take on the shape of a column or cube.	21.154% (11/52)	0.0723478	1.14	NA	NA	7.692% (4/52)	0.0310015	1.51	NA	NA	0% (0/52)	0.0106226	1.97	NA	NA	1.923% (1/52)	0.00748612	2.13	ENSG00000163251	FZD5	0% (0/52)	0.00977464	2.01	NA	NA
13	7.38	GO:0034446	substrate adhesion-dependent cell spreading	The morphogenetic process that results in flattening of a cell as a consequence of its adhesion to a substrate.	11.881% (12/101)	0.0083441	2.08	ENSG00000073712;ENSG00000073849;ENSG00000079691;ENSG00000087589;ENSG00000102837;ENSG00000115414;ENSG00000120156;ENSG00000130402;ENSG00000138448;ENSG00000150760;ENSG00000179051;ENSG00000197747	FERMT2;ST6GAL1;CARMIL1;CASS4;OLFM4;FN1;TEK;ACTN4;ITGAV;DOCK1;RCC2;S100A10	3.96% (4/101)	0.0381273	1.42	NA	NA	0% (0/101)	0.0239474	1.62	NA	NA	1.98% (2/101)	0.0312497	1.51	NA	NA	0.99% (1/101)	0.0201764	1.7	NA	NA
13	3.38	GO:0048468	cell development	The cellular developmental process in which a specific cell progresses from an immature to a mature state. Cell development start once cell commitment has taken place.	17.057% (481/2820)	0.000120015	3.92	ENSG00000004487;ENSG00000004939;ENSG00000005022;ENSG00000005194;ENSG00000005513;ENSG00000006607;ENSG00000006712;ENSG00000006740;ENSG00000007372;ENSG00000007944;ENSG00000008438;ENSG00000009694;ENSG00000010671;ENSG00000011143;ENSG00000011201;ENSG00000011426;ENSG00000012223;ENSG00000019582;ENSG00000025770;ENSG00000026025;ENSG00000028839;ENSG00000033867;ENSG00000037474;ENSG00000038427;ENSG00000043143…	KDM1A;SLC4A1;SLC25A5;CIAPIN1;SOX8;FARP2;PAF1;ARHGAP44;PAX6;MYLIP;PGLYRP1;TENM1;BTK;MKS1;ANOS1;ANLN;LTF;CD74;NCAPH2;VIM;TBPL1;SLC4A7;NSUN2;VCAN;JADE2;GPM6B;XK;NEDD4L;FSTL4;EIF2AK2;RC3H2;PRDM1;PITHD1;RASGRF1;DGKG;WNK1;LTK;SPEN;CDK13;CTNNA2;KDM4A;ASPM;FGFR2;ZFAT;FECH;KLF6;PRKCZ;ROCK1;HDAC4;MEF2A;PSME4;NEDD4;MAPK6;WDR1;TFRC;NFATC3;FBXW11;PICALM;EIF4G3;SLC25A40;SART3;MLH1;IL4R;USP33;NRDC;ITCH;SLC1A3;L…	4.823% (136/2820)	0.00157427	2.8	ENSG00000009694;ENSG00000010319;ENSG00000011201;ENSG00000012223;ENSG00000038427;ENSG00000049768;ENSG00000055332;ENSG00000057657;ENSG00000068024;ENSG00000068305;ENSG00000078747;ENSG00000079215;ENSG00000081479;ENSG00000082014;ENSG00000085733;ENSG00000086065;ENSG00000091129;ENSG00000092200;ENSG00000095464;ENSG00000096063;ENSG00000099250;ENSG00000100320;ENSG00000102524;ENSG00000103528;ENSG00000105048…	TENM1;SEMA3G;ANOS1;LTF;VCAN;FOXP3;EIF2AK2;PRDM1;HDAC4;MEF2A;ITCH;SLC1A3;LRP2;SMARCD3;CTTN;CHMP5;NRCAM;RPGRIP1;PDE6C;SRPK1;NRP1;RBFOX2;TNFSF13B;SYT17;TNNT1;CDK6;ITGB8;TNFSF8;SETX;NEURL1;MAPK14;VNN1;ADGRG6;PTK7;PDE4D;IL4;ACVR1;SOS1;NFE2L2;SGK1;TEK;CD80;CCR2;ACVR2A;TNFAIP6;BATF3;EDN3;OMG;PALLD;CDKN1C;LDLR;PPARG;CASP9;RSAD2;IL2RA;ARHGAP32;ANXA1;GPR55;SERPINE2;FLNB;KAT7;STXBP1;RTCA;HERC6;PDE5A;HORMAD1…	0.213% (6/2820)	0.000331632	3.48	ENSG00000081189;ENSG00000112655;ENSG00000128872;ENSG00000156738;ENSG00000186716;ENSG00000198399	MEF2C;PTK7;TMOD2;MS4A1;BCR;ITSN2	2.766% (78/2820)	0.00111035	2.95	ENSG00000011201;ENSG00000011426;ENSG00000012223;ENSG00000028839;ENSG00000047597;ENSG00000049759;ENSG00000056586;ENSG00000065883;ENSG00000066279;ENSG00000072274;ENSG00000079215;ENSG00000082014;ENSG00000088986;ENSG00000091129;ENSG00000092200;ENSG00000096063;ENSG00000100320;ENSG00000106462;ENSG00000109906;ENSG00000110723;ENSG00000111249;ENSG00000112062;ENSG00000112077;ENSG00000112290;ENSG00000112335…	ANOS1;ANLN;LTF;TBPL1;XK;NEDD4L;RC3H2;CDK13;ASPM;TFRC;SLC1A3;SMARCD3;DYNLL1;NRCAM;RPGRIP1;SRPK1;RBFOX2;EZH2;ZBTB16;EXPH5;CUX2;MAPK14;RHAG;WASF1;SNX3;KAT2B;TTL;LEPR;INHBA;NRN1;RAP2A;YWHAH;ASH2L;TOP2A;SERPINF1;ARHGAP32;ABCB10;IL10;KNL1;FGF2;TPM1;ARK2C;RAB13;S100A8;SLC4A10;DIAPH2;MFHAS1;CDKN2B;CDKN2A;UGCG;FEZ1;ITGB1;AKAP6;UHMK1;NRG1;KIT;JAK1;FZD5;IFI16;DNASE1L3;PLD4;SDC2;AHSP;ZNF160;BPGM;AGFG1;ERFE;C…	1.028% (29/2820)	0.00195958	2.71	ENSG00000007312;ENSG00000012223;ENSG00000077327;ENSG00000081189;ENSG00000091129;ENSG00000095585;ENSG00000103528;ENSG00000114315;ENSG00000117322;ENSG00000119042;ENSG00000122641;ENSG00000125249;ENSG00000129757;ENSG00000133424;ENSG00000134242;ENSG00000134909;ENSG00000134986;ENSG00000139174;ENSG00000141622;ENSG00000147889;ENSG00000150093;ENSG00000151320;ENSG00000156738;ENSG00000164056;ENSG00000166428…	CD79B;LTF;SPAG6;MEF2C;NRCAM;BLNK;SYT17;HES1;CR2;SATB2;INHBA;RAP2A;CDKN1C;LARGE1;PTPN22;ARHGAP32;NREP;PRICKLE1;ARK2C;CDKN2A;ITGB1;AKAP6;MS4A1;SPRY1;PLD4;EIF2AK3;CD19;EFNA5;GLDN
13	6.64	GO:0048469	cell maturation	The cellular developmental process, independent of morphogenetic (shape) change, that is required for a specific cell to attain its fully functional state.	13.462% (28/208)	0.00207589	2.68	ENSG00000004487;ENSG00000005513;ENSG00000006607;ENSG00000010671;ENSG00000085662;ENSG00000091129;ENSG00000100151;ENSG00000105568;ENSG00000116016;ENSG00000118689;ENSG00000124098;ENSG00000124233;ENSG00000125730;ENSG00000129757;ENSG00000132170;ENSG00000136160;ENSG00000139687;ENSG00000140526;ENSG00000145491;ENSG00000162722;ENSG00000163251;ENSG00000164136;ENSG00000166881;ENSG00000166947;ENSG00000168036…	KDM1A;SOX8;FARP2;BTK;AKR1B1;NRCAM;PICK1;PPP2R1A;EPAS1;FOXO3;FAM210B;SEMG1;C3;CDKN1C;PPARG;EDNRB;RB1;ABHD2;ROPN1L;TRIM58;FZD5;IL15;NEMP1;EPB42;CTNNB1;GATA2;YTHDF2;RHEX	2.404% (5/208)	0.00224931	2.65	ENSG00000091129;ENSG00000129757;ENSG00000132170;ENSG00000172572;ENSG00000179348	NRCAM;CDKN1C;PPARG;PDE3A;GATA2	0% (0/208)	0.00205673	2.69	NA	NA	1.442% (3/208)	0.000992355	3	ENSG00000091129;ENSG00000163251;ENSG00000186417	NRCAM;FZD5;GLDN	1.923% (4/208)	0.0059813	2.22	ENSG00000091129;ENSG00000114315;ENSG00000129757;ENSG00000186417	NRCAM;HES1;CDKN1C;GLDN
14	7.07	GO:0046470	phosphatidylcholine metabolic process	The chemical reactions and pathways involving phosphatidylcholines, any of a class of glycerophospholipids in which the phosphatidyl group is esterified to the hydroxyl group of choline. They are important constituents of cell membranes.	23.684% (18/76)	0.0211792	1.67	NA	NA	3.947% (3/76)	0.00526689	2.28	ENSG00000070214;ENSG00000130164;ENSG00000162909	SLC44A1;LDLR;CAPN2	0% (0/76)	0.0148578	1.83	NA	NA	1.316% (1/76)	0.0106585	1.97	NA	NA	0% (0/76)	0.0137673	1.86	NA	NA
14	5.12	GO:0006644	phospholipid metabolic process	The chemical reactions and pathways involving phospholipids, any lipid containing phosphoric acid as a mono- or diester.	20.106% (76/378)	0.0111355	1.95	NA	NA	2.646% (10/378)	0.0238376	1.62	NA	NA	0% (0/378)	0.00047298	3.33	NA	NA	1.323% (5/378)	0.0503621	1.3	NA	NA	0% (0/378)	0.000346994	3.46	NA	NA
14	5.4	GO:0006650	glycerophospholipid metabolic process	The chemical reactions and pathways involving glycerophospholipids, any derivative of glycerophosphate that contains at least one O-acyl, O-alkyl, or O-alkenyl group attached to the glycerol residue.	20.067% (60/299)	0.0197712	1.7	NA	NA	3.01% (9/299)	0.202158	0.69	NA	NA	0% (0/299)	0.0753481	1.12	NA	NA	1.338% (4/299)	0.00396376	2.4	ENSG00000111666;ENSG00000126775;ENSG00000188313;ENSG00000196407	CHPT1;ATG14;PLSCR1;THEM5	0% (0/299)	0.0660709	1.18	NA	NA
14	8.1	GO:0006656	phosphatidylcholine biosynthetic process	The chemical reactions and pathways resulting in the formation of phosphatidylcholines, any of a class of glycerophospholipids in which the phosphatidyl group is esterified to the hydroxyl group of choline.	20.69% (6/29)	0.0344047	1.46	NA	NA	6.897% (2/29)	0.0184146	1.73	NA	NA	0% (0/29)	0.00349222	2.46	NA	NA	3.448% (1/29)	0.00730294	2.14	ENSG00000111666	CHPT1	0% (0/29)	0.00316047	2.5	NA	NA
14	5.79	GO:0008654	phospholipid biosynthetic process	The chemical reactions and pathways resulting in the formation of a phospholipid, a lipid containing phosphoric acid as a mono- or diester.	21.825% (55/252)	0.0620751	1.21	NA	NA	3.571% (9/252)	0.00998334	2	ENSG00000070214;ENSG00000102780;ENSG00000114737;ENSG00000120833;ENSG00000162909;ENSG00000184557;ENSG00000188313;ENSG00000197121;ENSG00000198964	SLC44A1;DGKH;CISH;SOCS2;CAPN2;SOCS3;PLSCR1;PGAP1;SGMS1	0% (0/252)	0.021702	1.66	NA	NA	1.587% (4/252)	0.00105857	2.98	ENSG00000111666;ENSG00000126775;ENSG00000188313;ENSG00000198964	CHPT1;ATG14;PLSCR1;SGMS1	0% (0/252)	0.019479	1.71	NA	NA
14	6.03	GO:0046474	glycerophospholipid biosynthetic process	The chemical reactions and pathways resulting in the formation of glycerophospholipids, any derivative of glycerophosphate that contains at least one O-acyl, O-alkyl, or O-alkenyl group attached to the glycerol residue.	20.29% (42/207)	0.037836	1.42	NA	NA	3.865% (8/207)	0.000371064	3.43	ENSG00000070214;ENSG00000102780;ENSG00000114737;ENSG00000120833;ENSG00000162909;ENSG00000184557;ENSG00000188313;ENSG00000197121	SLC44A1;DGKH;CISH;SOCS2;CAPN2;SOCS3;PLSCR1;PGAP1	0% (0/207)	0.00677756	2.17	NA	NA	1.449% (3/207)	0.0445489	1.35	NA	NA	0% (0/207)	0.00541259	2.27	NA	NA
14	8.94	GO:0036092	phosphatidylinositol-3-phosphate biosynthetic process	The chemical reactions and pathways resulting in the formation of phosphatidylinositol-3-phosphate, a phosphatidylinositol monophosphate carrying the phosphate group at the 3-position.	4.545% (1/22)	0.000336775	3.47	ENSG00000196455	PIK3R4	0% (0/22)	0.00369859	2.43	NA	NA	0% (0/22)	0.00596431	2.22	NA	NA	4.545% (1/22)	0.0160729	1.79	NA	NA	0% (0/22)	0.00558477	2.25	NA	NA
14	6.59	GO:0006661	phosphatidylinositol biosynthetic process	The chemical reactions and pathways resulting in the formation of phosphatidylinositol, any glycophospholipid in which the sn-glycerol 3-phosphate residue is esterified to the 1-hydroxyl group of 1D-myo-inositol.	18.75% (24/128)	0.207114	0.68	NA	NA	3.125% (4/128)	0.0210888	1.68	NA	NA	0% (0/128)	0.0240401	1.62	NA	NA	0.781% (1/128)	0.00163198	2.79	ENSG00000126775	ATG14	0% (0/128)	0.0201658	1.7	NA	NA
14	4.73	GO:1901137	carbohydrate derivative biosynthetic process	NA	20.517% (135/658)	0.769262	0.11	NA	NA	4.407% (29/658)	0.00578167	2.24	ENSG00000070269;ENSG00000070526;ENSG00000113520;ENSG00000117069;ENSG00000119013;ENSG00000128268;ENSG00000134326;ENSG00000134851;ENSG00000138821;ENSG00000147408;ENSG00000153823;ENSG00000154027;ENSG00000154188;ENSG00000158089;ENSG00000162433;ENSG00000162630;ENSG00000164116;ENSG00000164398;ENSG00000165704;ENSG00000167283;ENSG00000169826;ENSG00000174473;ENSG00000179104;ENSG00000183696;ENSG00000184752…	TMEM260;ST6GALNAC1;IL4;ST6GALNAC5;NDUFB3;MGAT3;CMPK2;TMEM165;SLC39A8;CSGALNACT1;PID1;AK5;ANGPT1;GALNT14;AK4;B3GALT2;GUCY1A1;ACSL6;HPRT1;ATP5MG;CSGALNACT2;GALNTL6;TMTC2;UPP1;NDUFA12;PGAP1;MT-ND6;UBE2J1;ATP5MF	0% (0/658)	0.0139066	1.86	NA	NA	1.976% (13/658)	0.0179536	1.75	NA	NA	0.456% (3/658)	0.215873	0.67	NA	NA
14	4.93	GO:0090407	organophosphate biosynthetic process	The chemical reactions and pathways resulting in the biosynthesis of deoxyribose phosphate, the phosphorylated sugar 2-deoxy-erythro-pentose.	20.707% (123/594)	0.0113946	1.94	NA	NA	4.377% (26/594)	0.0353052	1.45	NA	NA	0.168% (1/594)	0.0265556	1.58	NA	NA	1.852% (11/594)	0.00996483	2	ENSG00000028839;ENSG00000111666;ENSG00000124172;ENSG00000126775;ENSG00000138496;ENSG00000154027;ENSG00000156136;ENSG00000162433;ENSG00000188313;ENSG00000198805;ENSG00000198964	TBPL1;CHPT1;ATP5F1E;ATG14;PARP9;AK5;DCK;AK4;PLSCR1;PNP;SGMS1	0.168% (1/594)	0.0297965	1.53	NA	NA
14	5.95	GO:0046390	ribose phosphate biosynthetic process	The chemical reactions and pathways resulting in the formation of ribose phosphate, any phosphorylated ribose sugar.	22.65% (53/234)	0.283059	0.55	NA	NA	5.556% (13/234)	0.0492288	1.31	NA	NA	0% (0/234)	0.0122162	1.91	NA	NA	1.709% (4/234)	0.0182588	1.74	NA	NA	0% (0/234)	0.00952174	2.02	NA	NA
14	7.98	GO:0006688	glycosphingolipid biosynthetic process	The chemical reactions and pathways resulting in the formation of glycosphingolipid, a compound with residues of sphingoid and at least one monosaccharide.	5.263% (2/38)	0.00798408	2.1	ENSG00000113532;ENSG00000148154	ST8SIA4;UGCG	5.263% (2/38)	0.0678409	1.17	NA	NA	0% (0/38)	0.0361196	1.44	NA	NA	2.632% (1/38)	0.0555616	1.26	NA	NA	2.632% (1/38)	0.0737493	1.13	NA	NA
14	9.22	GO:0008611	ether lipid biosynthetic process	The chemical reactions and pathways resulting in the formation of ether lipids, lipids that contain (normally) one lipid alcohol in ether linkage to one of the carbon atoms (normally C-1) of glycerol.	36.364% (4/11)	0.238026	0.62	NA	NA	0% (0/11)	0.00501167	2.3	NA	NA	0% (0/11)	0.00588496	2.23	NA	NA	9.091% (1/11)	0.0308555	1.51	NA	NA	0% (0/11)	0.00576017	2.24	NA	NA
14	4.6	GO:0008610	lipid biosynthetic process	The chemical reactions and pathways resulting in the formation of lipids, compounds soluble in an organic solvent but not, or sparingly, in an aqueous solvent.	17.867% (129/722)	0.0560068	1.25	NA	NA	3.463% (25/722)	0.00701443	2.15	ENSG00000070214;ENSG00000099377;ENSG00000102780;ENSG00000113231;ENSG00000114737;ENSG00000115425;ENSG00000117069;ENSG00000119537;ENSG00000120833;ENSG00000130164;ENSG00000135046;ENSG00000143753;ENSG00000145545;ENSG00000148459;ENSG00000148926;ENSG00000162630;ENSG00000162909;ENSG00000164398;ENSG00000170271;ENSG00000172296;ENSG00000184557;ENSG00000188313;ENSG00000197121;ENSG00000198964;ENSG00000242110	SLC44A1;HSD3B7;DGKH;PDE8B;CISH;PECR;ST6GALNAC5;KDSR;SOCS2;LDLR;ANXA1;DEGS1;SRD5A1;PDSS1;ADM;B3GALT2;CAPN2;ACSL6;FAXDC2;SPTLC3;SOCS3;PLSCR1;PGAP1;SGMS1;AMACR	0% (0/722)	0.00228729	2.64	NA	NA	1.385% (10/722)	0.0520501	1.28	NA	NA	0.139% (1/722)	0.016527	1.78	NA	NA
14	5.85	GO:0045017	glycerolipid biosynthetic process	The chemical reactions and pathways resulting in the formation of glycerolipids, any lipid with a glycerol backbone.	20.161% (50/248)	0.026317	1.58	NA	NA	3.629% (9/248)	0.114658	0.94	NA	NA	0% (0/248)	0.0911701	1.04	NA	NA	1.21% (3/248)	0.00981082	2.01	ENSG00000111666;ENSG00000126775;ENSG00000188313	CHPT1;ATG14;PLSCR1	0% (0/248)	0.0852481	1.07	NA	NA
14	8.35	GO:0019433	triglyceride catabolic process	The chemical reactions and pathways resulting in the breakdown of a triglyceride, any triester of glycerol.	18.519% (5/27)	0.000608705	3.22	ENSG00000006757;ENSG00000011198;ENSG00000163803;ENSG00000166035;ENSG00000175445	PNPLA4;ABHD5;PLB1;LIPC;LPL	0% (0/27)	0.000117706	3.93	NA	NA	0% (0/27)	0.000160343	3.79	NA	NA	0% (0/27)	0.000127698	3.89	NA	NA	0% (0/27)	0.000153466	3.81	NA	NA
14	6.91	GO:0006641	triglyceride metabolic process	The chemical reactions and pathways involving triglyceride, any triester of glycerol. The three fatty acid residues may all be the same or differ in any permutation. Triglycerides are important components of plant oils, animal fats and animal plasma lipoproteins.	16.038% (17/106)	0.00571796	2.24	ENSG00000006757;ENSG00000011198;ENSG00000025434;ENSG00000109670;ENSG00000125730;ENSG00000130164;ENSG00000132964;ENSG00000151726;ENSG00000163803;ENSG00000166035;ENSG00000168389;ENSG00000172977;ENSG00000175445;ENSG00000177565;ENSG00000197208;ENSG00000198814;ENSG00000205423	PNPLA4;ABHD5;NR1H3;FBXW7;C3;LDLR;CDK8;ACSL1;PLB1;LIPC;MFSD2A;KAT5;LPL;TBL1XR1;SLC22A4;GK;CNEP1R1	1.887% (2/106)	0.0376588	1.42	NA	NA	0% (0/106)	0.0361558	1.44	NA	NA	1.887% (2/106)	0.0222064	1.65	NA	NA	0% (0/106)	0.0332813	1.48	NA	NA
14	6.53	GO:0006639	acylglycerol metabolic process	The chemical reactions and pathways involving acylglycerol, any mono-, di- or triester of glycerol with (one or more) fatty acids.	18.657% (25/134)	0.324351	0.49	NA	NA	2.239% (3/134)	0.0204364	1.69	NA	NA	0% (0/134)	0.0136815	1.86	NA	NA	2.239% (3/134)	0.00596194	2.22	ENSG00000126775;ENSG00000132964;ENSG00000274588	ATG14;CDK8;DGKK	0% (0/134)	0.0122372	1.91	NA	NA
14	9.31	GO:0071071	regulation of phospholipid biosynthetic process	Any process that modulates the frequency, rate or extent of the chemical reactions and pathways resulting in the formation of phospholipids.	16.667% (3/18)	0.00954384	2.02	ENSG00000138413;ENSG00000153395;ENSG00000162909	IDH1;LPCAT1;CAPN2	5.556% (1/18)	0.0120748	1.92	NA	NA	0% (0/18)	0.0179378	1.75	NA	NA	0% (0/18)	0.0136598	1.86	NA	NA	0% (0/18)	0.016925	1.77	NA	NA
14	10.36	GO:0060304	regulation of phosphatidylinositol dephosphorylation	Any process that modulates the frequency, rate or extent of the chemical reaction involving the removal of one or more phosphate groups from a phosphatidylinositol.	16.667% (1/6)	0.0301331	1.52	NA	NA	0% (0/6)	0.00600095	2.22	NA	NA	0% (0/6)	0.00651429	2.19	NA	NA	0% (0/6)	0.00612307	2.21	NA	NA	0% (0/6)	0.00642421	2.19	NA	NA
14	8.16	GO:0046320	regulation of fatty acid oxidation	Any process that modulates the frequency, rate or extent of fatty acid oxidation.	20.588% (7/34)	0.0281329	1.55	NA	NA	5.882% (2/34)	0.00627805	2.2	ENSG00000094963;ENSG00000132170	FMO2;PPARG	0% (0/34)	0.0513088	1.29	NA	NA	0% (0/34)	0.0448481	1.35	NA	NA	0% (0/34)	0.0500071	1.3	NA	NA
14	9.17	GO:0046322	negative regulation of fatty acid oxidation	Any process that stops, prevents, or reduces the frequency, rate or extent of fatty acid oxidation.	21.429% (3/14)	0.0174228	1.76	NA	NA	7.143% (1/14)	0.0206731	1.68	NA	NA	0% (0/14)	0.00567395	2.25	NA	NA	0% (0/14)	0.00454499	2.34	NA	NA	0% (0/14)	0.00539748	2.27	NA	NA
14	5.82	GO:0019216	regulation of lipid metabolic process	Any process that modulates the frequency, rate or extent of the chemical reactions and pathways involving lipids.	15.287% (48/314)	0.00175949	2.75	ENSG00000011198;ENSG00000019582;ENSG00000025434;ENSG00000035681;ENSG00000076555;ENSG00000102910;ENSG00000103150;ENSG00000103642;ENSG00000108389;ENSG00000109670;ENSG00000109819;ENSG00000111537;ENSG00000113231;ENSG00000114166;ENSG00000114650;ENSG00000120915;ENSG00000125538;ENSG00000125730;ENSG00000125741;ENSG00000126351;ENSG00000130164;ENSG00000132170;ENSG00000132964;ENSG00000135046;ENSG00000138413…	ABHD5;CD74;NR1H3;NSMAF;ACACB;LONP2;MLYCD;LACTB;MTMR4;FBXW7;PPARGC1A;IFNG;PDE8B;KAT2B;SCAP;EPHX2;IL1B;C3;OPA3;THRA;LDLR;PPARG;CDK8;ANXA1;IDH1;AKT1;CERS2;ADM;PDE3B;LPCAT1;SAMD8;KIT;SLC45A3;ABCG1;CAPN2;ADORA1;ABHD6;STARD4;MID1IP1;MFSD2A;KAT5;STAT5B;TBL1XR1;ERFE;HCAR2;APOD;MALRD1;CNEP1R1	3.185% (10/314)	0.0542365	1.27	NA	NA	0% (0/314)	0.0257217	1.59	NA	NA	1.911% (6/314)	0.00971407	2.01	ENSG00000114166;ENSG00000126775;ENSG00000132964;ENSG00000152270;ENSG00000157404;ENSG00000178752	KAT2B;ATG14;CDK8;PDE3B;KIT;ERFE	0% (0/314)	0.0207375	1.68	NA	NA
14	9.42	GO:0090209	negative regulation of triglyceride metabolic process	Any process that decreases the frequency, rate or extent of the chemical reactions and pathways involving triglyceride, any triester of glycerol.	14.286% (2/14)	0.0254283	1.59	NA	NA	0% (0/14)	0.00399624	2.4	NA	NA	0% (0/14)	0.00561311	2.25	NA	NA	7.143% (1/14)	0.022604	1.65	NA	NA	0% (0/14)	0.00533933	2.27	NA	NA
15	8.97	GO:0045540	regulation of cholesterol biosynthetic process	Any process that modulates the frequency, rate or extent of the chemical reactions and pathways resulting in the formation of cholesterol.	10.526% (2/19)	0.00897695	2.05	ENSG00000114650;ENSG00000160179	SCAP;ABCG1	0% (0/19)	0.0126648	1.9	NA	NA	0% (0/19)	0.0186612	1.73	NA	NA	0% (0/19)	0.0144268	1.84	NA	NA	0% (0/19)	0.0176824	1.75	NA	NA
15	7.57	GO:0006695	cholesterol biosynthetic process	The chemical reactions and pathways resulting in the formation of cholesterol, cholest-5-en-3 beta-ol, the principal sterol of vertebrates and the precursor of many steroids, including bile acids and steroid hormones.	12.963% (7/54)	0.055512	1.26	NA	NA	0% (0/54)	0.00037716	3.42	NA	NA	0% (0/54)	0.00104976	2.98	NA	NA	1.852% (1/54)	0.0014408	2.84	ENSG00000052802	MSMO1	0% (0/54)	0.000917341	3.04	NA	NA
15	9.47	GO:0006707	cholesterol catabolic process	The chemical reactions and pathways resulting in the breakdown of cholesterol, cholest-5-en-3 beta-ol, the principal sterol of vertebrates and the precursor of many steroids, including bile acids and steroid hormones.	0% (0/9)	0.00905797	2.04	NA	NA	0% (0/9)	0.0278238	1.56	NA	NA	0% (0/9)	0.0353178	1.45	NA	NA	0% (0/9)	0.0301536	1.52	NA	NA	0% (0/9)	0.0341392	1.47	NA	NA
15	6.55	GO:0008203	cholesterol metabolic process	The chemical reactions and pathways involving cholesterol, cholest-5-en-3 beta-ol, the principal sterol of vertebrates and the precursor of many steroids, including bile acids and steroid hormones. It is a component of the plasma membrane lipid bilayer and of plasma lipoproteins and can be found in all animal tissues.	14.599% (20/137)	0.00217211	2.66	ENSG00000052802;ENSG00000066926;ENSG00000067064;ENSG00000104549;ENSG00000112972;ENSG00000113520;ENSG00000114650;ENSG00000116133;ENSG00000116285;ENSG00000116678;ENSG00000120915;ENSG00000128973;ENSG00000130164;ENSG00000131473;ENSG00000140459;ENSG00000160179;ENSG00000164211;ENSG00000165029;ENSG00000165782;ENSG00000166035	MSMO1;FECH;IDI1;SQLE;HMGCS1;IL4;SCAP;DHCR24;ERRFI1;LEPR;EPHX2;CLN6;LDLR;ACLY;CYP11A1;ABCG1;STARD4;ABCA1;PIP4P1;LIPC	1.46% (2/137)	0.000246257	3.61	ENSG00000113520;ENSG00000130164	IL4;LDLR	0% (0/137)	0.0043779	2.36	NA	NA	1.46% (2/137)	0.00449375	2.35	ENSG00000052802;ENSG00000116678	MSMO1;LEPR	0% (0/137)	0.00374465	2.43	NA	NA
15	8.28	GO:0090181	regulation of cholesterol metabolic process	Any process that modulates the rate, frequency, or extent of cholesterol metabolism, the chemical reactions and pathways involving cholesterol, cholest-5-en-3 beta-ol, the principal sterol of vertebrates and the precursor of many steroids, including bile acids and steroid hormones.	14.286% (5/35)	0.301694	0.52	NA	NA	2.857% (1/35)	0.0112436	1.95	NA	NA	0% (0/35)	0.00783496	2.11	NA	NA	0% (0/35)	0.00484651	2.31	NA	NA	0% (0/35)	0.00712225	2.15	NA	NA
15	9.42	GO:1902931	negative regulation of alcohol biosynthetic process	NA	7.143% (1/14)	0.0110773	1.96	NA	NA	0% (0/14)	0.00973658	2.01	NA	NA	0% (0/14)	0.0137325	1.86	NA	NA	0% (0/14)	0.010926	1.96	NA	NA	0% (0/14)	0.0130894	1.88	NA	NA
15	8.16	GO:1902930	regulation of alcohol biosynthetic process	NA	8.511% (4/47)	0.0875626	1.06	NA	NA	2.128% (1/47)	0.0136763	1.86	NA	NA	0% (0/47)	0.00167354	2.78	NA	NA	0% (0/47)	0.000780357	3.11	NA	NA	0% (0/47)	0.00142969	2.84	NA	NA
15	5.08	GO:1901615	organic hydroxy compound metabolic process	NA	15.48% (87/562)	0.0339565	1.47	NA	NA	3.203% (18/562)	0.0459908	1.34	NA	NA	0.178% (1/562)	0.00274082	2.56	ENSG00000120053	GOT1	2.669% (15/562)	0.0670008	1.17	NA	NA	0% (0/562)	0.011551	1.94	NA	NA
15	6.72	GO:0046165	alcohol biosynthetic process	The chemical reactions and pathways resulting in the formation of alcohols, any of a class of compounds containing one or more hydroxyl groups attached to a saturated carbon atom.	11.852% (16/135)	0.00182625	2.74	ENSG00000052802;ENSG00000067064;ENSG00000078124;ENSG00000101188;ENSG00000112972;ENSG00000114650;ENSG00000116133;ENSG00000120053;ENSG00000131473;ENSG00000143772;ENSG00000160179;ENSG00000168781;ENSG00000169403;ENSG00000172296;ENSG00000196542;ENSG00000228716	MSMO1;IDI1;ACER3;NTSR1;HMGCS1;SCAP;DHCR24;GOT1;ACLY;ITPKB;ABCG1;PPIP5K1;PTAFR;SPTLC3;SPTSSB;DHFR	1.481% (2/135)	0.034163	1.47	NA	NA	0.741% (1/135)	0.228151	0.64	NA	NA	2.222% (3/135)	0.237672	0.62	NA	NA	0% (0/135)	0.123746	0.91	NA	NA
15	6.04	GO:1901617	organic hydroxy compound biosynthetic process	NA	12.448% (30/241)	0.0223564	1.65	NA	NA	2.905% (7/241)	0.00210168	2.68	ENSG00000099377;ENSG00000140287;ENSG00000151012;ENSG00000170271;ENSG00000171631;ENSG00000172296;ENSG00000242110	HSD3B7;HDC;SLC7A11;FAXDC2;P2RY6;SPTLC3;AMACR	0.415% (1/241)	0.0188395	1.72	NA	NA	1.66% (4/241)	0.00730732	2.14	ENSG00000052802;ENSG00000078124;ENSG00000131979;ENSG00000151012	MSMO1;ACER3;GCH1;SLC7A11	0% (0/241)	0.0805229	1.09	NA	NA
15	8.72	GO:0010894	negative regulation of steroid biosynthetic process	Any process that decreases the frequency, rate or extent of the chemical reactions and pathways resulting in the formation of steroids, compounds with a 1,2,cyclopentanoperhydrophenanthrene nucleus.	12.5% (3/24)	0.00625503	2.2	ENSG00000113231;ENSG00000114650;ENSG00000204740	PDE8B;SCAP;MALRD1	4.167% (1/24)	0.0189993	1.72	NA	NA	0% (0/24)	0.00965896	2.02	NA	NA	0% (0/24)	0.00657072	2.18	NA	NA	0% (0/24)	0.00897177	2.05	NA	NA
15	7.54	GO:0050810	regulation of steroid biosynthetic process	Any process that modulates the frequency, rate or extent of the chemical reactions and pathways resulting in the formation of steroids, compounds with a 1,2,cyclopentanoperhydrophenanthrene nucleus.	9.459% (7/74)	0.113537	0.94	NA	NA	2.703% (2/74)	0.000583367	3.23	ENSG00000113231;ENSG00000148926	PDE8B;ADM	0% (0/74)	0.0713412	1.15	NA	NA	0% (0/74)	0.0541404	1.27	NA	NA	0% (0/74)	0.067153	1.17	NA	NA
15	8.75	GO:0046885	regulation of hormone biosynthetic process	Any process that modulates the frequency, rate or extent of the chemical reactions and pathways resulting in the formation of hormones.	12.5% (3/24)	0.105502	0.98	NA	NA	8.333% (2/24)	0.00553332	2.26	ENSG00000113231;ENSG00000148926	PDE8B;ADM	0% (0/24)	0.133541	0.87	NA	NA	4.167% (1/24)	0.114818	0.94	NA	NA	0% (0/24)	0.129535	0.89	NA	NA
15	10.11	GO:0031946	regulation of glucocorticoid biosynthetic process	Any process that modulates the frequency, rate or extent of the chemical reactions and pathways resulting in the formation of glucocorticoids.	0% (0/9)	0.0059696	2.22	NA	NA	0% (0/9)	0.0245003	1.61	NA	NA	0% (0/9)	0.0327539	1.48	NA	NA	0% (0/9)	0.0267826	1.57	NA	NA	0% (0/9)	0.0315094	1.5	NA	NA
15	9.31	GO:0090030	regulation of steroid hormone biosynthetic process	Any process that modulates the frequency, rate or extent of the chemical reactions and pathways resulting in the formation of steroid hormones,compounds with a 1, 2, cyclopentanoperhydrophenanthrene nucleus that act as hormones.	6.667% (1/15)	0.529861	0.28	NA	NA	6.667% (1/15)	0.0111036	1.95	NA	NA	0% (0/15)	0.00334662	2.48	NA	NA	0% (0/15)	0.00239262	2.62	NA	NA	0% (0/15)	0.00313733	2.5	NA	NA
15	10.23	GO:0032347	regulation of aldosterone biosynthetic process	Any process that modulates the frequency, rate or extent of the chemical reactions and pathways resulting in the formation of aldosterone.	0% (0/8)	0.00902434	2.04	NA	NA	0% (0/8)	0.0316772	1.5	NA	NA	0% (0/8)	0.04096	1.39	NA	NA	0% (0/8)	0.034266	1.47	NA	NA	0% (0/8)	0.0395075	1.4	NA	NA
15	8.78	GO:0006700	C21-steroid hormone biosynthetic process	The chemical reactions and pathways resulting in the formation of C21-steroid hormones, steroid compounds containing 21 carbons which function as hormones.	14.286% (3/21)	0.420574	0.38	NA	NA	4.762% (1/21)	0.0129409	1.89	NA	NA	0% (0/21)	0.00553649	2.26	NA	NA	0% (0/21)	0.00382352	2.42	NA	NA	0% (0/21)	0.00513807	2.29	NA	NA
15	8.84	GO:0045723	positive regulation of fatty acid biosynthetic process	Any process that activates or increases the frequency, rate or extent of the chemical reactions and pathways resulting in the formation of fatty acids.	31.818% (7/22)	0.0416369	1.38	NA	NA	4.545% (1/22)	0.000820761	3.09	ENSG00000135046	ANXA1	0% (0/22)	0.000645186	3.19	NA	NA	4.545% (1/22)	0.00235113	2.63	ENSG00000114166	KAT2B	0% (0/22)	0.000604858	3.22	NA	NA
15	9.17	GO:0045717	negative regulation of fatty acid biosynthetic process	Any process that stops, prevents, or reduces the frequency, rate or extent of the chemical reactions and pathways resulting in the formation of fatty acids.	0% (0/18)	0.000711472	3.15	NA	NA	0% (0/18)	0.00509575	2.29	NA	NA	0% (0/18)	0.00772324	2.11	NA	NA	0% (0/18)	0.00585851	2.23	NA	NA	0% (0/18)	0.00728851	2.14	NA	NA
15	9.47	GO:2001279	regulation of unsaturated fatty acid biosynthetic process	NA	25% (3/12)	0.0270946	1.57	NA	NA	8.333% (1/12)	0.00779462	2.11	ENSG00000135046	ANXA1	0% (0/12)	0.00850976	2.07	NA	NA	0% (0/12)	0.00789881	2.1	NA	NA	0% (0/12)	0.00835819	2.08	NA	NA
15	8.12	GO:0001516	prostaglandin biosynthetic process	The chemical reactions and pathways resulting in the formation of prostaglandins, any of a group of biologically active metabolites which contain a cyclopentane ring.	24.138% (7/29)	0.0897082	1.05	NA	NA	3.448% (1/29)	0.0102147	1.99	NA	NA	0% (0/29)	0.00636847	2.2	NA	NA	0% (0/29)	0.00386747	2.41	NA	NA	0% (0/29)	0.00576129	2.24	NA	NA
15	8.06	GO:0006699	bile acid biosynthetic process	The chemical reactions and pathways resulting in the formation of bile acids, any of a group of steroid carboxylic acids occurring in bile.	13.158% (5/38)	0.00340436	2.47	ENSG00000110048;ENSG00000116285;ENSG00000164211;ENSG00000204740;ENSG00000242110	OSBP;ERRFI1;STARD4;MALRD1;AMACR	5.263% (2/38)	0.0155891	1.81	NA	NA	0% (0/38)	0.0104668	1.98	NA	NA	0% (0/38)	0.00707478	2.15	NA	NA	0% (0/38)	0.00964595	2.02	NA	NA
15	6.02	GO:0072330	monocarboxylic acid biosynthetic process	The chemical reactions and pathways resulting in the formation of monocarboxylic acids, any organic acid containing one carboxyl (-COOH) group.	17.051% (37/217)	0.0625316	1.2	NA	NA	2.304% (5/217)	0.00371649	2.43	ENSG00000099377;ENSG00000115425;ENSG00000135046;ENSG00000143753;ENSG00000242110	HSD3B7;PECR;ANXA1;DEGS1;AMACR	0.461% (1/217)	0.0140955	1.85	NA	NA	0.461% (1/217)	0.0556502	1.25	NA	NA	0.461% (1/217)	0.150431	0.82	NA	NA
15	5.58	GO:0046394	carboxylic acid biosynthetic process	The chemical reactions and pathways resulting in the formation of carboxylic acids, any organic acid containing one or more carboxyl (-COOH) groups.	19.505% (63/323)	0.0942864	1.03	NA	NA	3.715% (12/323)	0.295338	0.53	NA	NA	0.619% (2/323)	0.00628847	2.2	ENSG00000117009;ENSG00000120053	KMO;GOT1	1.858% (6/323)	0.019731	1.7	NA	NA	0.31% (1/323)	0.019978	1.7	NA	NA
16	4.22	GO:0019637	organophosphate metabolic process	The chemical reactions and pathways involving organophosphates, any phosphate-containing organic compound.	18.066% (185/1024)	0.000342374	3.47	ENSG00000004455;ENSG00000004939;ENSG00000006007;ENSG00000011198;ENSG00000025434;ENSG00000028839;ENSG00000033867;ENSG00000040531;ENSG00000047230;ENSG00000058866;ENSG00000060642;ENSG00000065833;ENSG00000067064;ENSG00000068024;ENSG00000068366;ENSG00000068383;ENSG00000070214;ENSG00000075239;ENSG00000075399;ENSG00000076043;ENSG00000076555;ENSG00000081026;ENSG00000082212;ENSG00000087157;ENSG00000087253…	AK2;SLC4A1;GDE1;ABHD5;NR1H3;TBPL1;SLC4A7;CTNS;CTPS2;DGKG;PIGV;ME1;IDI1;HDAC4;ACSL4;INPP5A;SLC44A1;ACAT1;VPS9D1;REXO2;ACACB;MAGI3;ME2;PGS1;LPCAT2;CRLS1;P2RX7;PITPNM2;SLC25A1;ABHD4;PYGL;ITPK1;SLA2;NTSR1;VAPA;BMX;PHEX;DGKH;DHODH;MLYCD;QPRT;BPNT2;GCDH;NAMPT;PIP5K1B;MTMR4;PPARGC1A;OSBP;CHKA;IFNG;CHPT1;VNN1;HMGCS1;PDE8B;IL4;KAT2B;CISH;AMPD2;PLA2G4A;NDUFB3;PANK3;SOCS2;PLBD1;HYCC1;PIGT;ATP5F1E;NDUFA1;SGP…	3.613% (37/1024)	0.00444846	2.35	ENSG00000018625;ENSG00000068024;ENSG00000070214;ENSG00000094963;ENSG00000102780;ENSG00000112299;ENSG00000113231;ENSG00000113448;ENSG00000113520;ENSG00000114737;ENSG00000119013;ENSG00000120833;ENSG00000130164;ENSG00000134326;ENSG00000134333;ENSG00000138496;ENSG00000138735;ENSG00000153823;ENSG00000154027;ENSG00000162433;ENSG00000162909;ENSG00000164116;ENSG00000164398;ENSG00000165704;ENSG00000166165…	ATP1A2;HDAC4;SLC44A1;FMO2;DGKH;VNN1;PDE8B;PDE4D;IL4;CISH;NDUFB3;SOCS2;LDLR;CMPK2;LDHA;PARP9;PDE5A;PID1;AK5;AK4;CAPN2;GUCY1A1;ACSL6;HPRT1;CKB;ATP5MG;HINT1;P2RY6;CACNB4;UPP1;SOCS3;NDUFA12;PLSCR1;PGAP1;MT-ND6;SGMS1;ATP5MF	0.195% (2/1024)	0.252508	0.6	NA	NA	2.051% (21/1024)	0.00210623	2.68	ENSG00000028839;ENSG00000076043;ENSG00000089041;ENSG00000111666;ENSG00000114166;ENSG00000124172;ENSG00000126775;ENSG00000134333;ENSG00000135318;ENSG00000138496;ENSG00000154027;ENSG00000156136;ENSG00000156515;ENSG00000162433;ENSG00000172331;ENSG00000173598;ENSG00000182389;ENSG00000188313;ENSG00000196407;ENSG00000198805;ENSG00000198964	TBPL1;REXO2;P2RX7;CHPT1;KAT2B;ATP5F1E;ATG14;LDHA;NT5E;PARP9;AK5;DCK;HK1;AK4;BPGM;NUDT4;CACNB4;PLSCR1;THEM5;PNP;SGMS1	0.195% (2/1024)	0.0259137	1.59	NA	NA
16	3.33	GO:0006793	phosphorus metabolic process	The chemical reactions and pathways involving the nonmetallic element phosphorus or compounds that contain phosphorus, usually in the form of a phosphate group (PO4).	18.762% (482/2569)	0.0612066	1.21	NA	NA	3.854% (99/2569)	0.0299363	1.52	NA	NA	0.389% (10/2569)	0.00161287	2.79	ENSG00000026103;ENSG00000081189;ENSG00000107968;ENSG00000112655;ENSG00000117009;ENSG00000120162;ENSG00000152556;ENSG00000152894;ENSG00000153064;ENSG00000186716	FAS;MEF2C;MAP3K8;PTK7;KMO;MOB3B;PFKM;PTPRK;BANK1;BCR	2.919% (75/2569)	0.0285286	1.54	NA	NA	0.856% (22/2569)	0.0176217	1.75	NA	NA
16	5.76	GO:0016311	dephosphorylation	The process of removing one or more phosphoric (ester or anhydride) residues from a molecule.	17.785% (53/298)	0.00353693	2.45	ENSG00000011304;ENSG00000011485;ENSG00000058272;ENSG00000067900;ENSG00000068383;ENSG00000070190;ENSG00000072803;ENSG00000079335;ENSG00000082701;ENSG00000100526;ENSG00000100614;ENSG00000105197;ENSG00000105426;ENSG00000105568;ENSG00000106341;ENSG00000107758;ENSG00000108389;ENSG00000108465;ENSG00000108861;ENSG00000108953;ENSG00000111537;ENSG00000115241;ENSG00000116698;ENSG00000117751;ENSG00000120539…	PTBP1;PPP5C;PPP1R12A;ROCK1;INPP5A;DAPP1;FBXW11;CDC14A;GSK3B;CDKN3;PPM1A;TIMM50;PTPRS;PPP2R1A;PPP1R17;PPP3CB;MTMR4;CDK5RAP3;DUSP3;YWHAE;IFNG;PPM1G;SMG7;PPP1R8;MASTL;EPHX2;CRY2;SGPP1;LGALS3;ROCK2;PTPRQ;ACP1;DUSP11;PTPRG;MFHAS1;PTPRO;MGAT5;PTPRN2;PPM1J;DUSP2;PTPDC1;ALPL;ADORA1;PTPN13;FBP1;PIP4P1;PTP4A2;PTPRT;INPP5F;INPP5B;CNEP1R1;PPP1CB;ITGA1	1.678% (5/298)	0.0126715	1.9	NA	NA	0.671% (2/298)	0.0335678	1.47	NA	NA	2.349% (7/298)	0.00103225	2.99	ENSG00000108861;ENSG00000143727;ENSG00000147324;ENSG00000152894;ENSG00000158079;ENSG00000163082;ENSG00000213639	DUSP3;ACP1;MFHAS1;PTPRK;PTPDC1;SGPP2;PPP1CB	1.342% (4/298)	0.0295487	1.53	NA	NA
16	3.34	GO:0006796	phosphate-containing compound metabolic process	The chemical reactions and pathways involving the phosphate group, the anion or salt of any phosphoric acid.	18.789% (478/2544)	0.00652321	2.19	ENSG00000004455;ENSG00000004939;ENSG00000006007;ENSG00000007372;ENSG00000009694;ENSG00000009954;ENSG00000010671;ENSG00000011198;ENSG00000011304;ENSG00000011485;ENSG00000012223;ENSG00000012983;ENSG00000019582;ENSG00000025434;ENSG00000026103;ENSG00000026508;ENSG00000028839;ENSG00000033867;ENSG00000035664;ENSG00000037280;ENSG00000040531;ENSG00000043462;ENSG00000047230;ENSG00000055208;ENSG00000055332…	AK2;SLC4A1;GDE1;PAX6;TENM1;BAZ1B;BTK;ABHD5;PTBP1;PPP5C;LTF;MAP4K5;CD74;NR1H3;FAS;CD44;TBPL1;SLC4A7;DAPK2;FLT4;CTNS;LCP2;CTPS2;TAB2;EIF2AK2;CDK14;PPP1R12A;ATP2B4;DGKG;STYK1;WNK1;PIGV;LTK;ADCK1;MYLK;ME1;CDK13;TIE1;FGFR2;FECH;IDI1;PRKCZ;ROCK1;HDAC4;ACSL4;INPP5A;MAST4;MAPK6;DAPP1;SLC44A1;TFRC;FBXW11;ALPK1;FERMT2;TXK;ACAT1;VPS9D1;MARK3;REXO2;ACACB;TRAF4;UBE2K;MKNK1;CDC14A;MOK;HSP90AA1;MAGI3;STK17B;ME2…	3.852% (98/2544)	0.00345248	2.46	ENSG00000009694;ENSG00000012223;ENSG00000018625;ENSG00000026508;ENSG00000055208;ENSG00000055332;ENSG00000065534;ENSG00000068024;ENSG00000070214;ENSG00000087589;ENSG00000091436;ENSG00000094963;ENSG00000096063;ENSG00000099250;ENSG00000102780;ENSG00000105810;ENSG00000106341;ENSG00000108861;ENSG00000108950;ENSG00000108984;ENSG00000111961;ENSG00000112062;ENSG00000112299;ENSG00000112655;ENSG00000113231…	TENM1;LTF;ATP1A2;CD44;TAB2;EIF2AK2;MYLK;HDAC4;SLC44A1;CASS4;MAP3K20;FMO2;SRPK1;NRP1;DGKH;CDK6;PPP1R17;DUSP3;FAM20A;MAP2K6;SASH1;MAPK14;VNN1;PTK7;PDE8B;PDE4D;IL4;CSNK1A1;CISH;ACVR1;GADD45A;SGK1;NDUFB3;TEK;SOCS2;TRIM6;CD80;ACVR2A;CDKN2C;EDN3;CDKN1C;LDLR;SNX9;PPARG;CHI3L1;CMPK2;LDHA;APLNR;CD36;TXN;PARP9;HERC5;PDE5A;PTPRG;MFHAS1;CDKN2B;FCGR1A;ADRA2A;PID1;AK5;ANGPT1;SAMSN1;TTN;BAG4;NRG1;LRP8;AK4;JAK1;…	0.393% (10/2544)	0.0217964	1.66	NA	NA	2.948% (75/2544)	0.00769462	2.11	ENSG00000012223;ENSG00000028839;ENSG00000055208;ENSG00000058091;ENSG00000065883;ENSG00000072274;ENSG00000074966;ENSG00000076043;ENSG00000088325;ENSG00000088986;ENSG00000089041;ENSG00000091436;ENSG00000094804;ENSG00000096063;ENSG00000100448;ENSG00000106462;ENSG00000108861;ENSG00000108950;ENSG00000108984;ENSG00000111666;ENSG00000112062;ENSG00000114166;ENSG00000116199;ENSG00000116678;ENSG00000116717…	LTF;TBPL1;TAB2;CDK14;CDK13;TFRC;TXK;REXO2;TPX2;DYNLL1;P2RX7;MAP3K20;CDC6;SRPK1;CTSG;EZH2;DUSP3;FAM20A;MAP2K6;CHPT1;MAPK14;KAT2B;FAM20B;LEPR;GADD45A;PGF;INHBA;CIT;ATP5F1E;RAP2A;ATG14;CDK8;LDHA;CD36;NT5E;TXN;BARD1;PARP9;FGF2;ACP1;MFHAS1;CDKN2B;CDKN2A;FCGR1A;UHMK1;PTPRK;AK5;SAMSN1;DCK;HK1;NRG1;KIT;ERG;PTPDC1;AK4;JAK1;SGPP2;S100A12;CAMP;TERF2IP;ADAM9;BPGM;OXSR1;NUDT4;SEPHS2;CACNB4;HEXIM1;PLSCR1;THEM5…	0.865% (22/2544)	0.00473986	2.32	ENSG00000012223;ENSG00000074966;ENSG00000081189;ENSG00000081377;ENSG00000100448;ENSG00000114315;ENSG00000117009;ENSG00000120162;ENSG00000122641;ENSG00000125249;ENSG00000129757;ENSG00000130413;ENSG00000134242;ENSG00000135318;ENSG00000147889;ENSG00000152894;ENSG00000153064;ENSG00000157554;ENSG00000164047;ENSG00000172071;ENSG00000172232;ENSG00000184349	LTF;TXK;MEF2C;CDC14B;CTSG;HES1;KMO;MOB3B;INHBA;RAP2A;CDKN1C;STK33;PTPN22;NT5E;CDKN2A;PTPRK;BANK1;ERG;CAMP;EIF2AK3;AZU1;EFNA5
16	4.02	GO:0016310	phosphorylation	The process of introducing a phosphate group into a molecule, usually with the formation of a phosphoric ester, a phosphoric anhydride or a phosphoric amide.	19.002% (297/1563)	0.00016485	3.78	ENSG00000004455;ENSG00000007372;ENSG00000009694;ENSG00000009954;ENSG00000010671;ENSG00000012223;ENSG00000012983;ENSG00000019582;ENSG00000026103;ENSG00000026508;ENSG00000035664;ENSG00000037280;ENSG00000043462;ENSG00000055208;ENSG00000055332;ENSG00000058091;ENSG00000058668;ENSG00000058866;ENSG00000060140;ENSG00000060237;ENSG00000062524;ENSG00000063761;ENSG00000065534;ENSG00000065883;ENSG00000066056…	AK2;PAX6;TENM1;BAZ1B;BTK;LTF;MAP4K5;CD74;FAS;CD44;DAPK2;FLT4;LCP2;TAB2;EIF2AK2;CDK14;ATP2B4;DGKG;STYK1;WNK1;LTK;ADCK1;MYLK;CDK13;TIE1;FGFR2;FECH;PRKCZ;ROCK1;MAST4;MAPK6;TFRC;ALPK1;FERMT2;TXK;MARK3;TRAF4;UBE2K;MKNK1;MOK;HSP90AA1;STK17B;GSK3B;EIF2AK1;CASS4;TPX2;DYNLL1;P2RX7;IRAK3;GNPTG;MAP3K20;SRPK1;JAK2;OSM;PICK1;CTSG;CDKN3;ITPK1;SLC8A3;GSKIP;VRK1;ADNP;CDK5RAP1;RIOK3;TLR8;BMX;STK24;DNAJC3;RGCC;DGK…	4.351% (68/1563)	0.000220383	3.66	ENSG00000009694;ENSG00000012223;ENSG00000026508;ENSG00000055208;ENSG00000055332;ENSG00000065534;ENSG00000087589;ENSG00000091436;ENSG00000096063;ENSG00000099250;ENSG00000102780;ENSG00000105810;ENSG00000108861;ENSG00000108950;ENSG00000108984;ENSG00000111961;ENSG00000112062;ENSG00000112655;ENSG00000113448;ENSG00000113520;ENSG00000113712;ENSG00000115170;ENSG00000116717;ENSG00000118515;ENSG00000120156…	TENM1;LTF;CD44;TAB2;EIF2AK2;MYLK;CASS4;MAP3K20;SRPK1;NRP1;DGKH;CDK6;DUSP3;FAM20A;MAP2K6;SASH1;MAPK14;PTK7;PDE4D;IL4;CSNK1A1;ACVR1;GADD45A;SGK1;TEK;TRIM6;CD80;ACVR2A;CDKN2C;EDN3;CDKN1C;SNX9;PPARG;CHI3L1;CMPK2;APLNR;CD36;TXN;PARP9;HERC5;CDKN2B;FCGR1A;ADRA2A;PID1;AK5;ANGPT1;SAMSN1;TTN;BAG4;NRG1;LRP8;AK4;JAK1;COQ8A;S100A12;CAMP;CKB;PXK;ADAM9;FAXDC2;SEPHS2;SOCS3;ROR1;HLA-DRB1;ALPK2;GRK5;SGMS1;ERCC6	0.448% (7/1563)	4.09e-05	4.39	ENSG00000026103;ENSG00000107968;ENSG00000112655;ENSG00000120162;ENSG00000152556;ENSG00000153064;ENSG00000186716	FAS;MAP3K8;PTK7;MOB3B;PFKM;BANK1;BCR	3.583% (56/1563)	0.000244181	3.61	ENSG00000012223;ENSG00000055208;ENSG00000058091;ENSG00000065883;ENSG00000072274;ENSG00000074966;ENSG00000088325;ENSG00000088986;ENSG00000089041;ENSG00000091436;ENSG00000094804;ENSG00000096063;ENSG00000100448;ENSG00000106462;ENSG00000108861;ENSG00000108950;ENSG00000108984;ENSG00000112062;ENSG00000116199;ENSG00000116678;ENSG00000116717;ENSG00000119630;ENSG00000122641;ENSG00000122966;ENSG00000125249…	LTF;TAB2;CDK14;CDK13;TFRC;TXK;TPX2;DYNLL1;P2RX7;MAP3K20;CDC6;SRPK1;CTSG;EZH2;DUSP3;FAM20A;MAP2K6;MAPK14;FAM20B;LEPR;GADD45A;PGF;INHBA;CIT;RAP2A;ATG14;CDK8;CD36;TXN;BARD1;PARP9;FGF2;CDKN2B;CDKN2A;FCGR1A;UHMK1;AK5;SAMSN1;DCK;HK1;NRG1;KIT;ERG;AK4;JAK1;S100A12;CAMP;TERF2IP;ADAM9;OXSR1;SEPHS2;HEXIM1;TOP1;SGMS1;ERCC6;DGKK	1.088% (17/1563)	1.49e-05	4.83	ENSG00000012223;ENSG00000074966;ENSG00000100448;ENSG00000114315;ENSG00000120162;ENSG00000122641;ENSG00000125249;ENSG00000129757;ENSG00000130413;ENSG00000134242;ENSG00000147889;ENSG00000153064;ENSG00000157554;ENSG00000164047;ENSG00000172071;ENSG00000172232;ENSG00000184349	LTF;TXK;CTSG;HES1;MOB3B;INHBA;RAP2A;CDKN1C;STK33;PTPN22;CDKN2A;BANK1;ERG;CAMP;EIF2AK3;AZU1;EFNA5
16	9.91	GO:0009438	methylglyoxal metabolic process	The chemical reactions and pathways involving methylglyoxal, CH3-CO-CHO, the aldehyde of pyruvic acid.	0% (0/7)	0.00625185	2.2	NA	NA	0% (0/7)	0.0131897	1.88	NA	NA	0% (0/7)	0.0153279	1.81	NA	NA	0% (0/7)	0.0137992	1.86	NA	NA	0% (0/7)	0.015003	1.82	NA	NA
16	5.17	GO:0006091	generation of precursor metabolites and energy	The chemical reactions and pathways resulting in the formation of precursor metabolites, substances from which energy is derived, and any process involved in the liberation of energy from these substances.	19.488% (99/508)	0.0169666	1.77	NA	NA	3.543% (18/508)	0.000100561	4	ENSG00000068024;ENSG00000113520;ENSG00000115944;ENSG00000119013;ENSG00000134333;ENSG00000143753;ENSG00000145545;ENSG00000153823;ENSG00000162433;ENSG00000162496;ENSG00000163754;ENSG00000167283;ENSG00000170955;ENSG00000184752;ENSG00000198363;ENSG00000198695;ENSG00000219607;ENSG00000241468	HDAC4;IL4;COX7A2L;NDUFB3;LDHA;DEGS1;SRD5A1;PID1;AK4;DHRS3;GYG1;ATP5MG;CAVIN3;NDUFA12;ASPH;MT-ND6;PPP1R3G;ATP5MF	0.197% (1/508)	0.000298933	3.52	ENSG00000152556	PFKM	2.756% (14/508)	0.000191919	3.72	ENSG00000089041;ENSG00000114166;ENSG00000116678;ENSG00000124172;ENSG00000134333;ENSG00000145545;ENSG00000156515;ENSG00000162433;ENSG00000162496;ENSG00000163754;ENSG00000165678;ENSG00000172331;ENSG00000198363;ENSG00000213639	P2RX7;KAT2B;LEPR;ATP5F1E;LDHA;SRD5A1;HK1;AK4;DHRS3;GYG1;GHITM;BPGM;ASPH;PPP1CB	0% (0/508)	0.00120609	2.92	NA	NA
16	6.25	GO:0072593	reactive oxygen species metabolic process	The chemical reactions and pathways involving a reactive oxygen species, any molecules or ions formed by the incomplete one-electron reduction of oxygen. They contribute to the microbicidal activity of phagocytes, regulation of signal transduction and gene expression, and the oxidative damage to biopolymers.	16.957% (39/230)	0.0468139	1.33	NA	NA	5.217% (12/230)	0.0699297	1.16	NA	NA	0.435% (1/230)	0.00744921	2.13	ENSG00000186716	BCR	4.783% (11/230)	0.0954901	1.02	NA	NA	0.87% (2/230)	0.0142677	1.85	NA	NA
16	7.75	GO:0044273	sulfur compound catabolic process	The chemical reactions and pathways resulting in the breakdown of compounds that contain sulfur, such as the amino acids methionine and cysteine or the tripeptide glutathione.	17.778% (8/45)	0.0402438	1.4	NA	NA	0% (0/45)	0.00929572	2.03	NA	NA	0% (0/45)	0.0215986	1.67	NA	NA	0% (0/45)	0.0120093	1.92	NA	NA	0% (0/45)	0.019165	1.72	NA	NA
16	4.93	GO:0019439	aromatic compound catabolic process	The chemical reactions and pathways resulting in the breakdown of aromatic compounds, any substance containing an aromatic carbon ring.	17.324% (101/583)	0.00521447	2.28	ENSG00000004939;ENSG00000005007;ENSG00000006744;ENSG00000009307;ENSG00000026025;ENSG00000037474;ENSG00000054118;ENSG00000056586;ENSG00000066044;ENSG00000067900;ENSG00000068024;ENSG00000075239;ENSG00000076242;ENSG00000083896;ENSG00000089041;ENSG00000099622;ENSG00000100292;ENSG00000100697;ENSG00000102543;ENSG00000103150;ENSG00000103415;ENSG00000104889;ENSG00000105939;ENSG00000106605;ENSG00000107864…	SLC4A1;UPF1;ELAC2;CSDE1;VIM;NSUN2;THRAP3;RC3H2;ELAVL1;ROCK1;HDAC4;ACAT1;MLH1;YTHDC1;P2RX7;CIRBP;HMOX1;DICER1;CDADC1;MLYCD;HMOX2;RNASEH2A;ZC3HAV1;BLVRA;CPEB3;ZPR1;IFNG;MAPK14;VNN1;PDE8B;CNOT6;HGD;XRN1;KAT2B;SMG7;PPP1R8;EPHX2;FXR2;LSM4;EXOSC2;DKC1;RIDA;AMPD3;ROCK2;LDHA;PAN2;IER3;KYAT3;LARP1B;EIF4A3;AKT1;VPS54;ALDH1L1;PNRC1;CDKN2A;YTHDF1;HNMT;PELO;ENPP3;ELOC;HK1;SMG1;TENT5B;DFFA;HK3;DNASE1L3;WDR82;T…	3.602% (21/583)	0.0559818	1.25	NA	NA	0.515% (3/583)	0.0891204	1.05	NA	NA	3.259% (19/583)	0.0960246	1.02	NA	NA	0.686% (4/583)	0.0465235	1.33	NA	NA
16	3.95	GO:0044248	cellular catabolic process	The chemical reactions and pathways resulting in the breakdown of substances, carried out by individual cells.	18.199% (291/1599)	0.00198346	2.7	ENSG00000004939;ENSG00000005007;ENSG00000005022;ENSG00000006007;ENSG00000006715;ENSG00000006744;ENSG00000006757;ENSG00000007944;ENSG00000009307;ENSG00000011198;ENSG00000011465;ENSG00000026025;ENSG00000034713;ENSG00000035664;ENSG00000037474;ENSG00000054118;ENSG00000054983;ENSG00000055208;ENSG00000056586;ENSG00000058668;ENSG00000060237;ENSG00000065154;ENSG00000066044;ENSG00000066135;ENSG00000067900…	SLC4A1;UPF1;SLC25A5;GDE1;VPS41;ELAC2;PNPLA4;MYLIP;CSDE1;ABHD5;DCN;VIM;GABARAPL2;DAPK2;NSUN2;THRAP3;GALC;TAB2;RC3H2;ATP2B4;WNK1;OAT;ELAVL1;KDM4A;ROCK1;HDAC4;NEDD4;TRHDE;ACAT1;MLH1;ACACB;USP33;MCCC1;ACER3;NRDC;ITCH;TP53INP2;HSP90AA1;ARG2;GSK3B;RRAGB;YTHDC1;CTTN;ATG16L1;CHMP5;P2RX7;MUL1;EFNB1;ECHDC1;WAC;SH3GLB1;CIRBP;KLHL22;GGT5;DEPDC5;HMOX1;ATP6V1D;VTI1B;DICER1;MAP1LC3A;CDADC1;SUPT20H;LONP2;MLYCD;U…	3.44% (55/1599)	0.000627158	3.2	ENSG00000006715;ENSG00000055208;ENSG00000068024;ENSG00000078747;ENSG00000078804;ENSG00000085733;ENSG00000086065;ENSG00000097033;ENSG00000105939;ENSG00000108239;ENSG00000111144;ENSG00000111335;ENSG00000112062;ENSG00000112299;ENSG00000113231;ENSG00000113448;ENSG00000113520;ENSG00000113924;ENSG00000116044;ENSG00000116977;ENSG00000117450;ENSG00000118520;ENSG00000118640;ENSG00000119711;ENSG00000121236…	VPS41;TAB2;HDAC4;ITCH;TP53INP2;CTTN;CHMP5;SH3GLB1;ZC3HAV1;TBC1D12;LTA4H;OAS2;MAPK14;VNN1;PDE8B;PDE4D;IL4;HGD;NFE2L2;LGALS8;PRDX1;ARG1;VAMP8;ALDH6A1;TRIM6;SH3BP4;LDLR;SNX9;TRIM22;RIDA;LDHA;CD36;CYP1B1;PDE5A;HDC;EIF4A3;WDR45B;S100A8;ADRA2A;SLC16A1;S100A9;IFI16;WDR82;ARMC3;HPRT1;ADAM9;RNASE2;HINT1;MYD88;UPP1;ZFP36L1;MAOA;AMACR;PVT1;HP	0.313% (5/1599)	0.000133633	3.87	ENSG00000020577;ENSG00000104325;ENSG00000117009;ENSG00000120053;ENSG00000152556	SAMD4A;DECR1;KMO;GOT1;PFKM	3.002% (48/1599)	0.00174135	2.76	ENSG00000005381;ENSG00000009307;ENSG00000034713;ENSG00000048140;ENSG00000055208;ENSG00000056586;ENSG00000072657;ENSG00000078124;ENSG00000089041;ENSG00000099622;ENSG00000099910;ENSG00000100568;ENSG00000101412;ENSG00000103316;ENSG00000105939;ENSG00000111144;ENSG00000112062;ENSG00000114166;ENSG00000116678;ENSG00000117450;ENSG00000122641;ENSG00000126088;ENSG00000126775;ENSG00000134333;ENSG00000135218…	MPO;CSDE1;GABARAPL2;TSPAN17;TAB2;RC3H2;TRHDE;ACER3;P2RX7;CIRBP;KLHL22;VTI1B;E2F1;CRYM;ZC3HAV1;LTA4H;MAPK14;KAT2B;LEPR;PRDX1;INHBA;UROD;ATG14;LDHA;CD36;NT5E;DRAM1;IL10;CREG1;S100A8;CISD2;CDKN2A;FEZ1;SLC16A1;HK1;TAB3;FZD5;IFI16;DNASE1L3;ADAM9;RNASE2;BPGM;NUDT4;ERFE;MAOA;PNP;HBD;HP	0.438% (7/1599)	0.000119142	3.92	ENSG00000005381;ENSG00000117009;ENSG00000122641;ENSG00000134242;ENSG00000135318;ENSG00000147889;ENSG00000229474	MPO;KMO;INHBA;PTPN22;NT5E;CDKN2A;PATL2
16	5.02	GO:0006914	autophagy	The cellular catabolic process in which cells digest cellular materials, such as organelles and other macromolecular constituents, or non-self materials such as intracellular pathogens. Autophagy serves to provide essential nutrients under conditions of cellular stress; or can remodel intracellular structures during cell differentiation.	19.757% (114/577)	0.0719769	1.14	NA	NA	3.12% (18/577)	0.0150064	1.82	NA	NA	0% (0/577)	0.00203279	2.69	NA	NA	2.946% (17/577)	0.00642154	2.19	ENSG00000034713;ENSG00000055208;ENSG00000099910;ENSG00000100568;ENSG00000116678;ENSG00000122641;ENSG00000126775;ENSG00000136048;ENSG00000136634;ENSG00000143162;ENSG00000143546;ENSG00000145354;ENSG00000149557;ENSG00000157625;ENSG00000163251;ENSG00000163565;ENSG00000178752	GABARAPL2;TAB2;KLHL22;VTI1B;LEPR;INHBA;ATG14;DRAM1;IL10;CREG1;S100A8;CISD2;FEZ1;TAB3;FZD5;IFI16;ERFE	0.347% (2/577)	0.00257825	2.59	ENSG00000122641;ENSG00000134242	INHBA;PTPN22
16	4.16	GO:0043603	amide metabolic process	The chemical reactions and pathways involving an amide, any derivative of an oxoacid in which an acidic hydroxy group has been replaced by an amino or substituted amino group, as carried out by individual cells.	19.502% (227/1164)	0.0266268	1.57	NA	NA	2.491% (29/1164)	0.00018435	3.73	ENSG00000023909;ENSG00000035681;ENSG00000055332;ENSG00000065911;ENSG00000091436;ENSG00000105855;ENSG00000107954;ENSG00000111144;ENSG00000112299;ENSG00000116044;ENSG00000117069;ENSG00000118520;ENSG00000128268;ENSG00000132541;ENSG00000138061;ENSG00000141543;ENSG00000143753;ENSG00000151012;ENSG00000162630;ENSG00000163412;ENSG00000163950;ENSG00000164398;ENSG00000172296;ENSG00000173914;ENSG00000185650…	GCLM;NSMAF;EIF2AK2;MTHFD2;MAP3K20;ITGB8;NEURL1;LTA4H;VNN1;NFE2L2;ST6GALNAC5;ARG1;MGAT3;RIDA;CYP1B1;EIF4A3;DEGS1;SLC7A11;B3GALT2;EIF4E3;SLBP;ACSL6;SPTLC3;RBM4B;ZFP36L1;GSTK1;SGMS1;C8orf88;	0.172% (2/1164)	0.00144136	2.84	ENSG00000020577;ENSG00000153064	SAMD4A;BANK1	2.148% (25/1164)	0.00123214	2.91	ENSG00000001084;ENSG00000009307;ENSG00000013561;ENSG00000023909;ENSG00000065911;ENSG00000072657;ENSG00000078124;ENSG00000089041;ENSG00000091436;ENSG00000099622;ENSG00000100448;ENSG00000111144;ENSG00000111726;ENSG00000116898;ENSG00000134627;ENSG00000148154;ENSG00000151012;ENSG00000152332;ENSG00000170515;ENSG00000173914;ENSG00000187735;ENSG00000196407;ENSG00000198805;ENSG00000198964;ENSG00000253250	GCLC;CSDE1;RNF14;GCLM;MTHFD2;TRHDE;ACER3;P2RX7;MAP3K20;CIRBP;CTSG;LTA4H;CMAS;MRPS15;PIWIL4;UGCG;SLC7A11;UHMK1;PA2G4;RBM4B;TCEA1;THEM5;PNP;SGMS1;C8orf88	0.43% (5/1164)	0.00114724	2.94	ENSG00000023909;ENSG00000100448;ENSG00000153064;ENSG00000172071;ENSG00000229474	GCLM;CTSG;BANK1;EIF2AK3;PATL2
16	4.96	GO:0044270	cellular nitrogen compound catabolic process	The chemical reactions and pathways resulting in the breakdown of organic and inorganic nitrogenous compounds.	17.345% (98/565)	0.00812385	2.09	ENSG00000004939;ENSG00000005007;ENSG00000006744;ENSG00000009307;ENSG00000026025;ENSG00000037474;ENSG00000054118;ENSG00000056586;ENSG00000066044;ENSG00000067900;ENSG00000068024;ENSG00000075239;ENSG00000076242;ENSG00000083896;ENSG00000089041;ENSG00000099622;ENSG00000100292;ENSG00000100697;ENSG00000102543;ENSG00000103150;ENSG00000103415;ENSG00000103485;ENSG00000104889;ENSG00000105939;ENSG00000106605…	SLC4A1;UPF1;ELAC2;CSDE1;VIM;NSUN2;THRAP3;RC3H2;ELAVL1;ROCK1;HDAC4;ACAT1;MLH1;YTHDC1;P2RX7;CIRBP;HMOX1;DICER1;CDADC1;MLYCD;HMOX2;QPRT;RNASEH2A;ZC3HAV1;BLVRA;CPEB3;ZPR1;IFNG;MAPK14;VNN1;PDE8B;CNOT6;XRN1;KAT2B;SMG7;PPP1R8;ALDH6A1;FXR2;LSM4;EXOSC2;DKC1;RIDA;AMPD3;ROCK2;LDHA;PAN2;IER3;LARP1B;EIF4A3;AKT1;VPS54;ALDH1L1;PNRC1;CDKN2A;YTHDF1;HNMT;PELO;ENPP3;ELOC;HK1;SMG1;TENT5B;DFFA;HK3;DNASE1L3;WDR82;TENT…	3.54% (20/565)	0.0539896	1.27	NA	NA	0.531% (3/565)	0.0817602	1.09	NA	NA	3.186% (18/565)	0.097568	1.01	NA	NA	0.708% (4/565)	0.0407312	1.39	NA	NA
16	9.17	GO:0043605	amide catabolic process	The chemical reactions and pathways resulting in the breakdown of an amide, any derivative of an oxoacid in which an acidic hydroxy group has been replaced by an amino or substituted amino group.	0% (0/16)	0.0041708	2.38	NA	NA	0% (0/16)	0.0272604	1.56	NA	NA	0% (0/16)	0.0395001	1.4	NA	NA	0% (0/16)	0.0305656	1.51	NA	NA	0% (0/16)	0.0375203	1.43	NA	NA
17	8.1	GO:0006536	glutamate metabolic process	The chemical reactions and pathways involving glutamate, the anion of 2-aminopentanedioic acid.	21.212% (7/33)	0.0475451	1.32	NA	NA	6.061% (2/33)	0.00401965	2.4	ENSG00000023909;ENSG00000151012	GCLM;SLC7A11	3.03% (1/33)	0.00243371	2.61	ENSG00000120053	GOT1	9.091% (3/33)	0.0143814	1.84	NA	NA	3.03% (1/33)	0.0021953	2.66	ENSG00000023909	GCLM
17	9.31	GO:0050667	homocysteine metabolic process	The chemical reactions and pathways involving homocysteine, the amino acid alpha-amino-gamma-mercaptobutanoic acid. Homocysteine is an important intermediate in the metabolic reactions of its S-methyl derivative, methionine.	0% (0/13)	0.00254136	2.59	NA	NA	0% (0/13)	0.014288	1.85	NA	NA	0% (0/13)	0.0194907	1.71	NA	NA	0% (0/13)	0.0158546	1.8	NA	NA	0% (0/13)	0.0186463	1.73	NA	NA
17	9.31	GO:0006551	leucine metabolic process	The chemical reactions and pathways involving leucine, 2-amino-4-methylpentanoic acid.	25% (2/8)	0.122564	0.91	NA	NA	0% (0/8)	0.00845393	2.07	NA	NA	0% (0/8)	0.0110311	1.96	NA	NA	0% (0/8)	0.00921901	2.04	NA	NA	0% (0/8)	0.0106188	1.97	NA	NA
17	7.73	GO:0009066	aspartate family amino acid metabolic process	The chemical reactions and pathways involving amino acids of the aspartate family, comprising asparagine, aspartate, lysine, methionine and threonine.	11.111% (5/45)	0.000889356	3.05	ENSG00000120053;ENSG00000125166;ENSG00000132541;ENSG00000182551;ENSG00000185818	GOT1;GOT2;RIDA;ADI1;NAT8L	2.222% (1/45)	0.0031117	2.51	ENSG00000132541	RIDA	2.222% (1/45)	0.00634127	2.2	ENSG00000120053	GOT1	0% (0/45)	0.00137512	2.86	NA	NA	0% (0/45)	0.00210116	2.68	NA	NA
17	9.47	GO:0006591	ornithine metabolic process	The chemical reactions and pathways involving ornithine, an amino acid only rarely found in proteins, but which is important in living organisms as an intermediate in the reactions of the urea cycle and in arginine biosynthesis.	30% (3/10)	0.199537	0.7	NA	NA	10% (1/10)	0.0356386	1.45	NA	NA	0% (0/10)	0.00732042	2.14	NA	NA	0% (0/10)	0.00631317	2.2	NA	NA	0% (0/10)	0.00711983	2.15	NA	NA
17	7.98	GO:0009081	branched-chain amino acid metabolic process	The chemical reactions and pathways involving amino acids containing a branched carbon skeleton, comprising isoleucine, leucine and valine.	25% (7/28)	0.293488	0.53	NA	NA	3.571% (1/28)	0.182907	0.74	NA	NA	0% (0/28)	0.00685725	2.16	NA	NA	0% (0/28)	0.0798034	1.1	NA	NA	0% (0/28)	0.00633727	2.2	NA	NA
17	9.6	GO:0019530	taurine metabolic process	The chemical reactions and pathways involving taurine (2-aminoethanesulfonic acid), a sulphur-containing amino acid derivative important in the metabolism of fats.	11.111% (1/9)	0.00418674	2.38	ENSG00000173757	STAT5B	0% (0/9)	0.0125207	1.9	NA	NA	0% (0/9)	0.0158719	1.8	NA	NA	0% (0/9)	0.0136186	1.87	NA	NA	0% (0/9)	0.015343	1.81	NA	NA
17	7.77	GO:0000096	sulfur amino acid metabolic process	The chemical reactions and pathways involving amino acids containing sulfur, comprising cysteine, homocysteine, methionine and selenocysteine.	12.121% (4/33)	0.628795	0.2	NA	NA	6.061% (2/33)	0.00418102	2.38	ENSG00000023909;ENSG00000151012	GCLM;SLC7A11	0% (0/33)	0.000669446	3.17	NA	NA	9.091% (3/33)	0.0147204	1.83	NA	NA	3.03% (1/33)	0.00217785	2.66	ENSG00000023909	GCLM
17	7.02	GO:0033013	tetrapyrrole metabolic process	The chemical reactions and pathways involving tetrapyrroles, natural pigments containing four pyrrole rings joined by one-carbon units linking position 2 of one pyrrole ring to position 5 of the next.	24.59% (15/61)	0.0129292	1.89	NA	NA	1.639% (1/61)	0.00933943	2.03	ENSG00000080819	CPOX	0% (0/61)	0.0159384	1.8	NA	NA	6.557% (4/61)	0.0108177	1.97	NA	NA	0% (0/61)	0.0147807	1.83	NA	NA
17	6.33	GO:0006575	cellular modified amino acid metabolic process	The chemical reactions and pathways involving compounds derived from amino acids, organic acids containing one or more amino substituents.	22.346% (40/179)	0.00123472	2.91	ENSG00000001084;ENSG00000023909;ENSG00000040531;ENSG00000042832;ENSG00000065911;ENSG00000076351;ENSG00000099998;ENSG00000100983;ENSG00000112299;ENSG00000112303;ENSG00000112394;ENSG00000116044;ENSG00000120254;ENSG00000125166;ENSG00000125686;ENSG00000138413;ENSG00000143149;ENSG00000143797;ENSG00000143942;ENSG00000144645;ENSG00000144746;ENSG00000144908;ENSG00000148834;ENSG00000151012;ENSG00000156471…	GCLC;GCLM;CTNS;TG;MTHFD2;SLC46A1;GGT5;GSS;VNN1;VNN2;SLC16A10;NFE2L2;MTHFD1L;GOT2;MED1;IDH1;ALDH9A1;MBOAT2;CHAC2;OSBPL10;ARL6IP5;ALDH1L1;GSTO1;SLC7A11;PTDSS1;CPT2;CKB;MFSD2A;GATM;MBOAT1;SULT1B1;SHMT1;OPLAH;SHMT2;TMLHE;PLSCR1;SLC22A4;GSTK1;GSTM2;DHFR	6.145% (11/179)	0.021155	1.67	NA	NA	0% (0/179)	0.0127833	1.89	NA	NA	4.469% (8/179)	0.0293653	1.53	NA	NA	0.559% (1/179)	0.0110859	1.96	NA	NA
17	2.39	GO:1901564	organonitrogen compound metabolic process	NA	18.487% (1085/5869)	0.00275275	2.56	ENSG00000001084;ENSG00000003096;ENSG00000004455;ENSG00000004487;ENSG00000004897;ENSG00000004939;ENSG00000005007;ENSG00000006007;ENSG00000006118;ENSG00000007350;ENSG00000007372;ENSG00000007944;ENSG00000008438;ENSG00000009307;ENSG00000009694;ENSG00000009954;ENSG00000010017;ENSG00000010438;ENSG00000010671;ENSG00000011198;ENSG00000011275;ENSG00000011304;ENSG00000011376;ENSG00000011485;ENSG00000012223…	GCLC;KLHL13;AK2;KDM1A;CDC27;SLC4A1;UPF1;GDE1;TMEM132A;TKTL1;PAX6;MYLIP;PGLYRP1;CSDE1;TENM1;BAZ1B;RANBP9;PRSS3;BTK;ABHD5;RNF216;PTBP1;LARS2;PPP5C;LTF;UBR7;MAP4K5;PSMC4;RNF14;NUDCD3;CD74;ZRANB1;SERPINB1;GCLM;NR1H3;FAS;CD44;TBPL1;ALG1;SLC4A7;RNF19A;GABARAPL2;DAPK2;NSMAF;RPL26L1;FLT4;CTNS;TG;ADAM28;DCUN1D1;JADE2;LCP2;CTPS2;NEDD4L;HERPUD1;GALC;TAB2;EIF2AK2;RC3H2;PITHD1;CDK14;PPP1R12A;ATP2B4;STYK1;WNK1…	3.493% (205/5869)	7.15e-05	4.15	ENSG00000009694;ENSG00000012223;ENSG00000018625;ENSG00000023909;ENSG00000026508;ENSG00000035681;ENSG00000038295;ENSG00000055208;ENSG00000055332;ENSG00000064886;ENSG00000065534;ENSG00000065911;ENSG00000068024;ENSG00000070214;ENSG00000070269;ENSG00000070526;ENSG00000077616;ENSG00000078098;ENSG00000078747;ENSG00000078804;ENSG00000079215;ENSG00000080819;ENSG00000081479;ENSG00000086065;ENSG00000087128…	TENM1;LTF;ATP1A2;GCLM;CD44;NSMAF;TLL1;TAB2;EIF2AK2;CHI3L2;MYLK;MTHFD2;HDAC4;SLC44A1;TMEM260;ST6GALNAC1;NAALAD2;FAP;ITCH;TP53INP2;SLC1A3;CPOX;LRP2;CHMP5;TMPRSS11E;CASS4;MAP3K20;FMO2;SRPK1;NRP1;PSMA6;CDK6;ITGB8;RIGI;NEURL1;DUSP3;FAM20A;MAP2K6;USP46;DTX4;ANAPC15;LTA4H;NCOA7;SASH1;MAPK14;VNN1;PTK7;PDE8B;PDE4D;IL4;CSNK1A1;HGD;CISH;ADAM23;ACVR1;IFIH1;NFE2L2;GADD45A;ST6GALNAC5;MMP8;SGK1;ARG1;NDUFB3;KDSR…	0.204% (12/5869)	0.00323667	2.49	ENSG00000020577;ENSG00000026103;ENSG00000107968;ENSG00000112655;ENSG00000117009;ENSG00000120053;ENSG00000120162;ENSG00000152556;ENSG00000152894;ENSG00000153064;ENSG00000174080;ENSG00000186716	SAMD4A;FAS;MAP3K8;PTK7;KMO;GOT1;MOB3B;PFKM;PTPRK;BANK1;CTSF;BCR	2.862% (168/5869)	0.00013481	3.87	ENSG00000001084;ENSG00000003096;ENSG00000004897;ENSG00000007350;ENSG00000009307;ENSG00000012223;ENSG00000013561;ENSG00000023909;ENSG00000028839;ENSG00000034713;ENSG00000048140;ENSG00000049759;ENSG00000055208;ENSG00000056586;ENSG00000058091;ENSG00000065883;ENSG00000065911;ENSG00000072274;ENSG00000072657;ENSG00000074966;ENSG00000078124;ENSG00000079215;ENSG00000080819;ENSG00000088325;ENSG00000089041…	GCLC;KLHL13;CDC27;TKTL1;CSDE1;LTF;RNF14;GCLM;TBPL1;GABARAPL2;TSPAN17;NEDD4L;TAB2;RC3H2;CDK14;CDK13;MTHFD2;TFRC;TRHDE;TXK;ACER3;SLC1A3;CPOX;TPX2;P2RX7;MAP3K20;CDC6;SRPK1;CIRBP;KLHL22;APOL4;RBX1;CTSG;CRYM;ZDHHC2;EZH2;DUSP3;FAM20A;MAP2K6;ZBTB16;LTA4H;CHPT1;CMAS;NCOA7;MAPK14;SNX3;SLC16A10;KAT2B;TTL;FAM20B;LEPR;GADD45A;MRPS15;MMP8;ABCG2;PGF;PCMT1;INHBA;DCAF10;CIT;ATP5F1E;RAP2A;UROD;ATG14;AOC3;GCH1;CDK…	0.579% (34/5869)	7.26e-06	5.14	ENSG00000000971;ENSG00000002587;ENSG00000012223;ENSG00000023909;ENSG00000074966;ENSG00000081377;ENSG00000100448;ENSG00000112812;ENSG00000114315;ENSG00000117009;ENSG00000118113;ENSG00000120162;ENSG00000122641;ENSG00000125249;ENSG00000129757;ENSG00000130413;ENSG00000133169;ENSG00000133424;ENSG00000134242;ENSG00000135318;ENSG00000139174;ENSG00000141622;ENSG00000147889;ENSG00000152894;ENSG00000153064…	CFH;HS3ST1;LTF;GCLM;TXK;CDC14B;CTSG;PRSS16;HES1;KMO;MMP8;MOB3B;INHBA;RAP2A;CDKN1C;STK33;BEX1;LARGE1;PTPN22;NT5E;PRICKLE1;ARK2C;CDKN2A;PTPRK;BANK1;ERG;CAMP;HSPA4L;HTRA3;EIF2AK3;AZU1;OLR1;EFNA5;PATL2
17	10	GO:0036109	alpha-linolenic acid metabolic process	The chemical reactions and pathways involving alpha-linolenic acid, an unsaturated omega-6 fatty acid that has the molecular formula C18H32O2.	10% (1/10)	0.00655474	2.18	ENSG00000149485	FADS1	0% (0/10)	0.0176838	1.75	NA	NA	0% (0/10)	0.021372	1.67	NA	NA	0% (0/10)	0.019005	1.72	NA	NA	0% (0/10)	0.0209355	1.68	NA	NA
17	9.91	GO:0006107	oxaloacetate metabolic process	The chemical reactions and pathways involving oxaloacetate, the anion of oxobutanedioic acid, an important intermediate in metabolism, especially as a component of the TCA cycle.	33.333% (3/9)	0.227879	0.64	NA	NA	0% (0/9)	0.00393204	2.41	NA	NA	11.111% (1/9)	0.036784	1.43	NA	NA	0% (0/9)	0.00434602	2.36	NA	NA	0% (0/9)	0.00508572	2.29	NA	NA
17	8.9	GO:0072350	tricarboxylic acid metabolic process	The chemical reactions and pathways involving dicarboxylic acids, any organic acid containing three carboxyl (COOH) groups or anions (COO-).	25% (4/16)	0.133459	0.87	NA	NA	0% (0/16)	0.00298348	2.53	NA	NA	0% (0/16)	0.00422873	2.37	NA	NA	0% (0/16)	0.00336383	2.47	NA	NA	0% (0/16)	0.00402071	2.4	NA	NA
17	4.7	GO:0032787	monocarboxylic acid metabolic process	The chemical reactions and pathways involving monocarboxylic acids, any organic acid containing one carboxyl (COOH) group or anion (COO-).	16.746% (105/627)	0.00629231	2.2	ENSG00000004939;ENSG00000011198;ENSG00000019582;ENSG00000025434;ENSG00000052802;ENSG00000065833;ENSG00000068024;ENSG00000068366;ENSG00000072210;ENSG00000073737;ENSG00000075239;ENSG00000076555;ENSG00000078070;ENSG00000079215;ENSG00000081760;ENSG00000082212;ENSG00000085662;ENSG00000089041;ENSG00000093144;ENSG00000099194;ENSG00000099998;ENSG00000102910;ENSG00000103150;ENSG00000105135;ENSG00000105607…	SLC4A1;ABHD5;CD74;NR1H3;MSMO1;ME1;HDAC4;ACSL4;ALDH3A2;DHRS9;ACAT1;ACACB;MCCC1;SLC1A3;AACS;ME2;AKR1B1;P2RX7;ECHDC1;SCD;GGT5;LONP2;MLYCD;ILVBL;GCDH;PTGR1;PPARGC1A;OSBP;PTGES3;IFNG;DSE;MAPK14;VNN1;VNN2;KAT2B;SCAP;PECR;ERRFI1;PLA2G4A;FAAH;MTHFD1L;IL1B;C3;ECHS1;ALDH1A2;IVD;CYP2E1;ACLY;PPARG;HSD17B4;LDHA;ANXA1;CD36;IER3;CYP1B1;SLC5A6;IDH1;NAAA;HADH;PEX5;ETFA;ABHD2;AKT1;MPC2;MGST3;DEGS1;PTGES;FADS1;ACSL…	2.871% (18/627)	0.0120835	1.92	NA	NA	0.478% (3/627)	0.00170065	2.77	ENSG00000104325;ENSG00000117009;ENSG00000152556	DECR1;KMO;PFKM	2.073% (13/627)	0.00444731	2.35	ENSG00000052802;ENSG00000079215;ENSG00000089041;ENSG00000112062;ENSG00000114166;ENSG00000134333;ENSG00000135218;ENSG00000155380;ENSG00000156515;ENSG00000157404;ENSG00000172331;ENSG00000178752;ENSG00000196407	MSMO1;SLC1A3;P2RX7;MAPK14;KAT2B;LDHA;CD36;SLC16A1;HK1;KIT;BPGM;ERFE;THEM5	0.159% (1/627)	0.000635198	3.2	ENSG00000117009	KMO
17	6.73	GO:0006090	pyruvate metabolic process	The chemical reactions and pathways involving pyruvate, 2-oxopropanoate.	13.559% (16/118)	0.0606203	1.22	NA	NA	2.542% (3/118)	0.0287185	1.54	NA	NA	0.847% (1/118)	0.00557886	2.25	ENSG00000152556	PFKM	5.085% (6/118)	0.12084	0.92	NA	NA	0% (0/118)	0.0198893	1.7	NA	NA
17	10.23	GO:0019626	short-chain fatty acid catabolic process	The chemical reactions and pathways resulting in the breakdown of a short-chain fatty acid. A short-chain fatty acid has an aliphatic tail containing fewer than 6 carbons.	0% (0/7)	0.00450497	2.35	NA	NA	0% (0/7)	0.00933681	2.03	NA	NA	0% (0/7)	0.0108278	1.97	NA	NA	0% (0/7)	0.00976801	2.01	NA	NA	0% (0/7)	0.010608	1.97	NA	NA
17	7.14	GO:0006635	fatty acid beta-oxidation	A fatty acid oxidation process that results in the complete oxidation of a long-chain fatty acid. Fatty acid beta-oxidation begins with the addition of coenzyme A to a fatty acid, and occurs by successive cycles of reactions during each of which the fatty acid is shortened by a two-carbon fragment removed as acetyl coenzyme A; the cycle continues until only two or three carbons remain (as acetyl-…	21.053% (16/76)	0.0074919	2.13	ENSG00000075239;ENSG00000076555;ENSG00000093144;ENSG00000102910;ENSG00000103150;ENSG00000105607;ENSG00000127884;ENSG00000128928;ENSG00000133835;ENSG00000138796;ENSG00000139197;ENSG00000140374;ENSG00000142208;ENSG00000157184;ENSG00000168389;ENSG00000242110	ACAT1;ACACB;ECHDC1;LONP2;MLYCD;GCDH;ECHS1;IVD;HSD17B4;HADH;PEX5;ETFA;AKT1;CPT2;MFSD2A;AMACR	1.316% (1/76)	0.000284201	3.55	ENSG00000242110	AMACR	1.316% (1/76)	0.00169655	2.77	ENSG00000104325	DECR1	0% (0/76)	0.000399297	3.4	NA	NA	0% (0/76)	0.000637841	3.2	NA	NA
17	5.89	GO:0046395	carboxylic acid catabolic process	The chemical reactions and pathways resulting in the breakdown of carboxylic acids, any organic acid containing one or more carboxyl (-COOH) groups.	16.667% (42/252)	0.000156195	3.81	ENSG00000058668;ENSG00000065154;ENSG00000075239;ENSG00000076555;ENSG00000078070;ENSG00000081181;ENSG00000093144;ENSG00000102910;ENSG00000103150;ENSG00000103485;ENSG00000105135;ENSG00000105607;ENSG00000113924;ENSG00000117480;ENSG00000118520;ENSG00000119711;ENSG00000120053;ENSG00000125166;ENSG00000127884;ENSG00000128928;ENSG00000132541;ENSG00000133835;ENSG00000137944;ENSG00000138796;ENSG00000139197…	ATP2B4;OAT;ACAT1;ACACB;MCCC1;ARG2;ECHDC1;LONP2;MLYCD;QPRT;ILVBL;GCDH;HGD;FAAH;ARG1;ALDH6A1;GOT1;GOT2;ECHS1;IVD;RIDA;HSD17B4;KYAT3;HADH;PEX5;HDC;ETFA;ABHD2;AKT1;ALDH1L1;HNMT;ACAD8;SLC16A1;CPT2;GPT2;DPEP2;MFSD2A;SHMT1;SHMT2;ABAT;HEXA;AMACR	2.778% (7/252)	0.00105563	2.98	ENSG00000113924;ENSG00000118520;ENSG00000119711;ENSG00000132541;ENSG00000140287;ENSG00000155380;ENSG00000242110	HGD;ARG1;ALDH6A1;RIDA;HDC;SLC16A1;AMACR	1.19% (3/252)	0.000818112	3.09	ENSG00000104325;ENSG00000117009;ENSG00000120053	DECR1;KMO;GOT1	0.794% (2/252)	0.00147899	2.83	ENSG00000103316;ENSG00000155380	CRYM;SLC16A1	0.397% (1/252)	0.000672754	3.17	ENSG00000117009	KMO
17	6.69	GO:0009063	amino acid catabolic process	The chemical reactions and pathways resulting in the breakdown of amino acids, organic acids containing one or more amino substituents.	19.643% (22/112)	0.0246517	1.61	NA	NA	4.464% (5/112)	0.0051895	2.28	ENSG00000113924;ENSG00000118520;ENSG00000119711;ENSG00000132541;ENSG00000140287	HGD;ARG1;ALDH6A1;RIDA;HDC	1.786% (2/112)	0.00462572	2.33	ENSG00000117009;ENSG00000120053	KMO;GOT1	0.893% (1/112)	0.000957895	3.02	ENSG00000103316	CRYM	0.893% (1/112)	0.00198275	2.7	ENSG00000117009	KMO
17	9.53	GO:0006527	arginine catabolic process	The chemical reactions and pathways resulting in the breakdown of arginine, 2-amino-5-(carbamimidamido)pentanoic acid.	44.444% (4/9)	0.450446	0.35	NA	NA	11.111% (1/9)	0.00766832	2.12	ENSG00000118520	ARG1	0% (0/9)	0.00712907	2.15	NA	NA	0% (0/9)	0.00641811	2.19	NA	NA	0% (0/9)	0.00697998	2.16	NA	NA
18	9.05	GO:0061621	canonical glycolysis	The glycolytic process that begins with the conversion of glucose to glucose-6-phosphate by glucokinase activity. Glycolytic processes are the chemical reactions and pathways resulting in the breakdown of a carbohydrate into pyruvate, with the concomitant production of a small amount of ATP.	11.111% (2/18)	0.0160247	1.8	NA	NA	0% (0/18)	0.00992367	2	NA	NA	5.556% (1/18)	0.0577531	1.24	NA	NA	5.556% (1/18)	0.0423738	1.37	NA	NA	0% (0/18)	0.0155425	1.81	NA	NA
18	8.94	GO:0061620	glycolytic process through glucose-6-phosphate	The chemical reactions and pathways resulting in the breakdown of a carbohydrate into pyruvate, occurring through a glucose-6-phosphate intermediate, with the concomitant production of a small amount of ATP.	10% (2/20)	0.00744832	2.13	ENSG00000156515;ENSG00000160883	HK1;HK3	0% (0/20)	0.390881	0.41	NA	NA	5% (1/20)	0.0370616	1.43	NA	NA	5% (1/20)	0.0260983	1.58	NA	NA	0% (0/20)	0.00978033	2.01	NA	NA
18	8.7	GO:0061615	glycolytic process through fructose-6-phosphate	The chemical reactions and pathways resulting in the breakdown of a monosaccharide into pyruvate, occurring through a fructose-6-phosphate intermediate, with the concomitant production of ATP and NADH.	12.5% (3/24)	0.44105	0.36	NA	NA	0% (0/24)	0.0596843	1.22	NA	NA	4.167% (1/24)	0.0151732	1.82	NA	NA	4.167% (1/24)	0.00984203	2.01	ENSG00000156515	HK1	0% (0/24)	0.105665	0.98	NA	NA
18	7.41	GO:1900542	regulation of purine nucleotide metabolic process	NA	16.092% (14/87)	0.0398405	1.4	NA	NA	3.448% (3/87)	0.00525273	2.28	ENSG00000068024;ENSG00000113520;ENSG00000153823	HDAC4;IL4;PID1	0% (0/87)	0.00191265	2.72	NA	NA	2.299% (2/87)	0.00504299	2.3	ENSG00000089041;ENSG00000114166	P2RX7;KAT2B	0% (0/87)	0.0481158	1.32	NA	NA
18	6.97	GO:0009179	purine ribonucleoside diphosphate metabolic process	The chemical reactions and pathways involving purine ribonucleoside diphosphate, a compound consisting of a purine base linked to a ribose sugar esterified with diphosphate on the sugar.	14.414% (16/111)	0.136901	0.86	NA	NA	3.604% (4/111)	0.0619892	1.21	NA	NA	0.901% (1/111)	0.00625858	2.2	ENSG00000152556	PFKM	7.207% (8/111)	0.190918	0.72	NA	NA	0.901% (1/111)	0.0409245	1.39	NA	NA
18	7.57	GO:0009116	nucleoside metabolic process	The chemical reactions and pathways involving a nucleoside, a nucleobase linked to either beta-D-ribofuranose (a ribonucleoside) or 2-deoxy-beta-D-ribofuranose, (a deoxyribonucleoside), e.g. adenosine, guanosine, inosine, cytidine, uridine and deoxyadenosine, deoxyguanosine, deoxycytidine and thymidine (= deoxythymidine).	10.526% (6/57)	0.000985169	3.01	ENSG00000102543;ENSG00000165118;ENSG00000165704;ENSG00000183696;ENSG00000188641;ENSG00000198805	CDADC1;QNG1;HPRT1;UPP1;DPYD;PNP	3.509% (2/57)	0.00458799	2.34	ENSG00000165704;ENSG00000183696	HPRT1;UPP1	0% (0/57)	0.00743548	2.13	NA	NA	3.509% (2/57)	0.00533906	2.27	ENSG00000135318;ENSG00000198805	NT5E;PNP	1.754% (1/57)	0.0069575	2.16	ENSG00000135318	NT5E
18	4.72	GO:0055086	nucleobase-containing small molecule metabolic process	The cellular chemical reactions and pathways involving a nucleobase-containing small molecule: a nucleobase, a nucleoside, or a nucleotide.	16.716% (112/670)	0.0184338	1.73	NA	NA	4.179% (28/670)	0.0231863	1.63	NA	NA	0.299% (2/670)	0.0455096	1.34	NA	NA	2.537% (17/670)	0.00546414	2.26	ENSG00000028839;ENSG00000076043;ENSG00000089041;ENSG00000114166;ENSG00000124172;ENSG00000134333;ENSG00000135318;ENSG00000138496;ENSG00000154027;ENSG00000156136;ENSG00000156515;ENSG00000162433;ENSG00000172331;ENSG00000173598;ENSG00000182389;ENSG00000196407;ENSG00000198805	TBPL1;REXO2;P2RX7;KAT2B;ATP5F1E;LDHA;NT5E;PARP9;AK5;DCK;HK1;AK4;BPGM;NUDT4;CACNB4;THEM5;PNP	0.299% (2/670)	0.0112882	1.95	NA	NA
18	6.43	GO:0046496	nicotinamide nucleotide metabolic process	The chemical reactions and pathways involving nicotinamide nucleotides, any nucleotide that contains combined nicotinamide.	13.333% (22/165)	0.026274	1.58	NA	NA	2.424% (4/165)	0.0117683	1.93	NA	NA	1.212% (2/165)	0.00283934	2.55	ENSG00000117009;ENSG00000152556	KMO;PFKM	3.636% (6/165)	0.0508223	1.29	NA	NA	0.606% (1/165)	0.0121654	1.91	NA	NA
18	5.37	GO:0009150	purine ribonucleotide metabolic process	The chemical reactions and pathways involving a purine ribonucleotide, a compound consisting of ribonucleoside (a purine base linked to a ribose sugar) esterified with a phosphate group at either the 3' or 5'-hydroxyl group of the sugar.	18.243% (81/444)	0.0732769	1.14	NA	NA	4.73% (21/444)	0.103734	0.98	NA	NA	0.225% (1/444)	0.00973613	2.01	ENSG00000152556	PFKM	2.928% (13/444)	0.0552129	1.26	NA	NA	0.225% (1/444)	0.136507	0.86	NA	NA
18	9.6	GO:0042167	heme catabolic process	The chemical reactions and pathways resulting in the breakdown of heme, any compound of iron complexed in a porphyrin (tetrapyrrole) ring.	27.273% (3/11)	0.111598	0.95	NA	NA	0% (0/11)	0.00195523	2.71	NA	NA	0% (0/11)	0.00259473	2.59	NA	NA	0% (0/11)	0.0021592	2.67	NA	NA	0% (0/11)	0.00250523	2.6	NA	NA
18	7.61	GO:0006783	heme biosynthetic process	The chemical reactions and pathways resulting in the formation of heme, any compound of iron complexed in a porphyrin (tetrapyrrole) ring, from less complex precursors.	26.667% (8/30)	0.117543	0.93	NA	NA	3.333% (1/30)	0.00943306	2.03	ENSG00000080819	CPOX	0% (0/30)	0.00508253	2.29	NA	NA	13.333% (4/30)	0.0895536	1.05	NA	NA	0% (0/30)	0.00470104	2.33	NA	NA
18	8.41	GO:0006085	acetyl-CoA biosynthetic process	The chemical reactions and pathways resulting in the formation of acetyl-CoA, a derivative of coenzyme A in which the sulfhydryl group is acetylated.	33.333% (6/18)	0.227618	0.64	NA	NA	0% (0/18)	0.0029748	2.53	NA	NA	0% (0/18)	0.00493811	2.31	NA	NA	0% (0/18)	0.00347725	2.46	NA	NA	0% (0/18)	0.00461202	2.34	NA	NA
18	5.66	GO:0009165	nucleotide biosynthetic process	The chemical reactions and pathways resulting in the formation of nucleotides, any nucleoside that is esterified with (ortho)phosphate or an oligophosphate at any hydroxyl group on the glycose moiety; may be mono-, di- or triphosphate; this definition includes cyclic-nucleotides (nucleoside cyclic phosphates).	20.962% (61/291)	0.130401	0.88	NA	NA	5.155% (15/291)	0.0373731	1.43	NA	NA	0.344% (1/291)	0.00915468	2.04	ENSG00000117009	KMO	2.405% (7/291)	0.0137705	1.86	NA	NA	0.344% (1/291)	0.00673013	2.17	ENSG00000117009	KMO
18	10.23	GO:0045008	depyrimidination	The disruption of the bond between the sugar in the backbone and the C or T base, causing the base to be removed and leaving a depyrimidinated sugar.	0% (0/8)	0.00428838	2.37	NA	NA	0% (0/8)	0.0149982	1.82	NA	NA	0% (0/8)	0.0195213	1.71	NA	NA	0% (0/8)	0.0162971	1.79	NA	NA	0% (0/8)	0.0187882	1.73	NA	NA
18	7.03	GO:0019364	pyridine nucleotide catabolic process	The chemical reactions and pathways resulting in the breakdown of a pyridine nucleotide, a nucleotide characterized by a pyridine derivative as a nitrogen base.	11.702% (11/94)	0.117809	0.93	NA	NA	2.128% (2/94)	0.0473331	1.32	NA	NA	1.064% (1/94)	0.00837797	2.08	ENSG00000152556	PFKM	5.319% (5/94)	0.22729	0.64	NA	NA	0% (0/94)	0.043906	1.36	NA	NA
18	6.58	GO:0006195	purine nucleotide catabolic process	The chemical reactions and pathways resulting in the breakdown of a purine nucleotide, a compound consisting of nucleoside (a purine base linked to a deoxyribose or ribose sugar) esterified with a phosphate group at either the 3' or 5'-hydroxyl group of the sugar.	14.583% (21/144)	0.176451	0.75	NA	NA	5.556% (8/144)	0.125657	0.9	NA	NA	0.694% (1/144)	0.00955425	2.02	ENSG00000152556	PFKM	5.556% (8/144)	0.156017	0.81	NA	NA	0.694% (1/144)	0.0402509	1.4	NA	NA
19	10.23	GO:1901162	primary amino compound biosynthetic process	NA	0% (0/6)	0.00689501	2.16	NA	NA	0% (0/6)	0.0170302	1.77	NA	NA	0% (0/6)	0.0206128	1.69	NA	NA	0% (0/6)	0.0181961	1.74	NA	NA	0% (0/6)	0.0200528	1.7	NA	NA
19	3.71	GO:1901566	organonitrogen compound biosynthetic process	NA	20% (343/1715)	0.285682	0.54	NA	NA	3.673% (63/1715)	0.0049551	2.3	ENSG00000023909;ENSG00000055332;ENSG00000070214;ENSG00000070269;ENSG00000070526;ENSG00000079215;ENSG00000080819;ENSG00000091436;ENSG00000107201;ENSG00000107954;ENSG00000113520;ENSG00000116044;ENSG00000117069;ENSG00000118520;ENSG00000119013;ENSG00000119537;ENSG00000121594;ENSG00000128268;ENSG00000132541;ENSG00000134326;ENSG00000134851;ENSG00000138061;ENSG00000138496;ENSG00000138821;ENSG00000140287…	GCLM;EIF2AK2;SLC44A1;TMEM260;ST6GALNAC1;SLC1A3;CPOX;MAP3K20;RIGI;NEURL1;IL4;NFE2L2;ST6GALNAC5;ARG1;NDUFB3;KDSR;CD80;MGAT3;RIDA;CMPK2;TMEM165;CYP1B1;PARP9;SLC39A8;HDC;EIF4A3;ALDH9A1;DEGS1;CSGALNACT1;SLC7A11;PID1;AK5;ANGPT1;GALNT14;ZDHHC1;AK4;B3GALT2;CAPN2;EIF4E3;SLBP;GUCY1A1;ACSL6;ALDH1A1;HPRT1;CKB;ATP5MG;CSGALNACT2;SPTLC3;RBM4B;GALNTL6;TMTC2;SEPHS2;UPP1;NDUFA12;ZFP36L1;PLSCR1;PGAP1;MT-ND6;UBE2J1;…	0.233% (4/1715)	0.0351061	1.45	NA	NA	2.449% (42/1715)	0.0101212	1.99	NA	NA	0.525% (9/1715)	0.0231364	1.64	NA	NA
19	8.43	GO:0000097	sulfur amino acid biosynthetic process	The chemical reactions and pathways resulting in the formation of amino acids containing sulfur, comprising cysteine, methionine and selenocysteine.	6.25% (1/16)	0.00538148	2.27	ENSG00000182551	ADI1	0% (0/16)	0.0352563	1.45	NA	NA	0% (0/16)	0.0510486	1.29	NA	NA	0% (0/16)	0.0394103	1.4	NA	NA	0% (0/16)	0.0485907	1.31	NA	NA
19	10.23	GO:0019240	citrulline biosynthetic process	The chemical reactions and pathways resulting in the formation of citrulline, N5-carbamoyl-L-ornithine, an alpha amino acid not found in proteins.	20% (1/5)	0.0048918	2.31	ENSG00000058668	ATP2B4	0% (0/5)	0.000228176	3.64	NA	NA	0% (0/5)	0.000239661	3.62	NA	NA	0% (0/5)	0.000230054	3.64	NA	NA	0% (0/5)	0.000236982	3.63	NA	NA
19	7.19	GO:1901607	alpha-amino acid biosynthetic process	NA	17.647% (12/68)	0.132766	0.88	NA	NA	1.471% (1/68)	0.105552	0.98	NA	NA	1.471% (1/68)	0.00931316	2.03	ENSG00000120053	GOT1	1.471% (1/68)	0.114101	0.94	NA	NA	0% (0/68)	0.132068	0.88	NA	NA
19	5.31	GO:0009100	glycoprotein metabolic process	The chemical reactions and pathways involving glycoproteins, a protein that contains covalently bound glycose (i.e. monosaccharide) residues; the glycose occurs most commonly as oligosaccharide or fairly small polysaccharide but occasionally as monosaccharide.	19.189% (71/370)	0.0405327	1.39	NA	NA	3.784% (14/370)	0.00250773	2.6	ENSG00000070269;ENSG00000070526;ENSG00000117069;ENSG00000128268;ENSG00000134851;ENSG00000138821;ENSG00000147408;ENSG00000158089;ENSG00000161944;ENSG00000162630;ENSG00000169826;ENSG00000174473;ENSG00000179104;ENSG00000198833	TMEM260;ST6GALNAC1;ST6GALNAC5;MGAT3;TMEM165;SLC39A8;CSGALNACT1;GALNT14;ASGR2;B3GALT2;CSGALNACT2;GALNTL6;TMTC2;UBE2J1	0% (0/370)	0.000805224	3.09	NA	NA	1.351% (5/370)	0.000470354	3.33	ENSG00000116199;ENSG00000134851;ENSG00000158089;ENSG00000173852;ENSG00000179104	FAM20B;TMEM165;GALNT14;DPY19L1;TMTC2	0.541% (2/370)	0.000717914	3.14	ENSG00000002587;ENSG00000133424	HS3ST1;LARGE1
19	5.48	GO:0009101	glycoprotein biosynthetic process	The chemical reactions and pathways resulting in the formation of glycoproteins, a protein that contains covalently bound glycose (i.e. monosaccharide) residues; the glycose occurs most commonly as oligosaccharide or fairly small polysaccharide but occasionally as monosaccharide.	20.065% (62/309)	0.278795	0.55	NA	NA	4.207% (13/309)	0.0161264	1.79	NA	NA	0% (0/309)	0.00315855	2.5	NA	NA	1.618% (5/309)	0.00284058	2.55	ENSG00000116199;ENSG00000134851;ENSG00000158089;ENSG00000173852;ENSG00000179104	FAM20B;TMEM165;GALNT14;DPY19L1;TMTC2	0.647% (2/309)	0.00450865	2.35	ENSG00000002587;ENSG00000133424	HS3ST1;LARGE1
19	6.4	GO:0002181	cytoplasmic translation	The chemical reactions and pathways resulting in the formation of a protein in the cytoplasm. This is a ribosome-mediated process in which the information in messenger RNA (mRNA) is used to specify the sequence of amino acids in the protein.	24.375% (39/160)	0.27168	0.57	NA	NA	0.625% (1/160)	0.000817245	3.09	ENSG00000163950	SLBP	0% (0/160)	0.00396282	2.4	NA	NA	0.625% (1/160)	0.00237058	2.63	ENSG00000009307	CSDE1	0% (0/160)	0.00318146	2.5	NA	NA
19	9.91	GO:0070127	tRNA aminoacylation for mitochondrial protein translation	The synthesis of aminoacyl tRNA by the formation of an ester bond between the 3'-hydroxyl group of the most 3' adenosine of the tRNA, to be used in ribosome-mediated polypeptide synthesis in a mitochondrion.	25% (2/8)	0.0624243	1.2	NA	NA	0% (0/8)	0.00473878	2.32	NA	NA	0% (0/8)	0.00611977	2.21	NA	NA	0% (0/8)	0.00518354	2.29	NA	NA	0% (0/8)	0.00590077	2.23	NA	NA
19	9.22	GO:0006750	glutathione biosynthetic process	The chemical reactions and pathways resulting in the formation of glutathione, the tripeptide glutamylcysteinylglycine, which acts as a coenzyme for some enzymes and as an antioxidant in the protection of sulfhydryl groups in enzymes and other proteins.	46.667% (7/15)	0.330766	0.48	NA	NA	20% (3/15)	0.0288922	1.54	NA	NA	0% (0/15)	0.00145529	2.84	NA	NA	20% (3/15)	0.0310241	1.51	NA	NA	6.667% (1/15)	0.00794681	2.1	ENSG00000023909	GCLM
19	9.42	GO:0000050	urea cycle	The sequence of reactions by which arginine is synthesized from ornithine, then cleaved to yield urea and regenerate ornithine. The overall reaction equation is NH3 + CO2 + aspartate + 3 ATP + 2 H2O = urea + fumarate + 2 ADP + 2 phosphate + AMP + diphosphate.	27.273% (3/11)	0.192079	0.72	NA	NA	9.091% (1/11)	0.025653	1.59	NA	NA	0% (0/11)	0.00523911	2.28	NA	NA	0% (0/11)	0.00450286	2.35	NA	NA	0% (0/11)	0.00507143	2.29	NA	NA
19	8.18	GO:0006595	polyamine metabolic process	The chemical reactions and pathways involving polyamines, any organic compound containing two or more amino groups.	11.111% (2/18)	0.00980503	2.01	ENSG00000123505;ENSG00000130066	AMD1;SAT1	0% (0/18)	0.0984771	1.01	NA	NA	0% (0/18)	0.00540123	2.27	NA	NA	0% (0/18)	0.0990625	1	NA	NA	0% (0/18)	0.00504747	2.3	NA	NA
19	8.9	GO:0006596	polyamine biosynthetic process	The chemical reactions and pathways resulting in the formation of polyamines, any organic compound containing two or more amino groups.	15.385% (2/13)	0.0415106	1.38	NA	NA	0% (0/13)	0.00791181	2.1	NA	NA	0% (0/13)	0.0113634	1.94	NA	NA	0% (0/13)	0.00886332	2.05	NA	NA	0% (0/13)	0.0107738	1.97	NA	NA
19	7.99	GO:0042401	biogenic amine biosynthetic process	The chemical reactions and pathways occurring at the level of individual cells resulting in the formation of any of a group of naturally occurring, biologically active amines, such as norepinephrine, histamine, and serotonin, many of which act as neurotransmitters.	8.108% (3/37)	0.0343501	1.46	NA	NA	2.703% (1/37)	0.117843	0.93	NA	NA	0% (0/37)	0.00162573	2.79	NA	NA	2.703% (1/37)	0.134007	0.87	NA	NA	0% (0/37)	0.0014595	2.84	NA	NA
19	8.02	GO:0042417	dopamine metabolic process	The chemical reactions and pathways involving dopamine, a catecholamine neurotransmitter and a metabolic precursor of noradrenaline and adrenaline.	7.692% (3/39)	0.00967786	2.01	ENSG00000165704;ENSG00000183044;ENSG00000189221	HPRT1;ABAT;MAOA	5.128% (2/39)	0.120408	0.92	NA	NA	0% (0/39)	0.115398	0.94	NA	NA	5.128% (2/39)	0.143986	0.84	NA	NA	0% (0/39)	0.105198	0.98	NA	NA
19	8.7	GO:0042423	catecholamine biosynthetic process	The chemical reactions and pathways resulting in the formation of any of a group of physiologically important biogenic amines that possess a catechol (3,4-dihydroxyphenyl) nucleus and are derivatives of 3,4-dihydroxyphenylethylamine.	4.762% (1/21)	0.00837827	2.08	ENSG00000140287	HDC	4.762% (1/21)	0.087847	1.06	NA	NA	0% (0/21)	0.050562	1.3	NA	NA	4.762% (1/21)	0.0998796	1	NA	NA	0% (0/21)	0.0469962	1.33	NA	NA
19	7.74	GO:0046189	phenol-containing compound biosynthetic process	The chemical reactions and pathways resulting in the formation of a phenol, any compound containing one or more hydroxyl groups directly attached to an aromatic carbon ring.	10.638% (5/47)	0.0189463	1.72	NA	NA	4.255% (2/47)	0.00922345	2.04	ENSG00000140287;ENSG00000151012	HDC;SLC7A11	0% (0/47)	0.00466733	2.33	NA	NA	4.255% (2/47)	0.0113698	1.94	NA	NA	0% (0/47)	0.00411254	2.39	NA	NA
19	6.3	GO:0044272	sulfur compound biosynthetic process	The chemical reactions and pathways resulting in the formation of compounds that contain sulfur, such as the amino acids methionine and cysteine or the tripeptide glutathione.	20.71% (35/169)	0.152331	0.82	NA	NA	4.142% (7/169)	0.0063129	2.2	ENSG00000023909;ENSG00000116044;ENSG00000147408;ENSG00000151012;ENSG00000154188;ENSG00000164398;ENSG00000169826	GCLM;NFE2L2;CSGALNACT1;SLC7A11;ANGPT1;ACSL6;CSGALNACT2	0% (0/169)	0.0247515	1.61	NA	NA	1.775% (3/169)	0.00326147	2.49	ENSG00000001084;ENSG00000023909;ENSG00000151012	GCLC;GCLM;SLC7A11	1.183% (2/169)	0.0334529	1.48	NA	NA
19	8.35	GO:0009110	vitamin biosynthetic process	The chemical reactions and pathways resulting in the formation of a vitamin, one of a number of unrelated organic substances that occur in many foods in small amounts and that are necessary in trace amounts for the normal metabolic functioning of the body.	8% (2/25)	0.00396481	2.4	ENSG00000085662;ENSG00000111537	AKR1B1;IFNG	0% (0/25)	0.00159608	2.8	NA	NA	0% (0/25)	0.00245961	2.61	NA	NA	0% (0/25)	0.00185768	2.73	NA	NA	0% (0/25)	0.00230216	2.64	NA	NA
19	7.6	GO:0042181	ketone biosynthetic process	The chemical reactions and pathways resulting in the formation of ketones, a class of organic compounds that contain the carbonyl group, CO, and in which the carbonyl group is bonded only to carbon atoms. The general formula for a ketone is RCOR, where R and R are alkyl or aryl groups.	12% (6/50)	0.0991457	1	NA	NA	6% (3/50)	0.029085	1.54	NA	NA	0% (0/50)	0.0148389	1.83	NA	NA	0% (0/50)	0.00814997	2.09	NA	NA	0% (0/50)	0.0131865	1.88	NA	NA
19	9.47	GO:0045019	negative regulation of nitric oxide biosynthetic process	Any process that stops, prevents, or reduces the frequency, rate or extent of the chemical reactions and pathways resulting in the formation of nitric oxide.	28.571% (4/14)	0.0838099	1.08	NA	NA	0% (0/14)	0.00122394	2.91	NA	NA	0% (0/14)	0.00171294	2.77	NA	NA	14.286% (2/14)	0.0246032	1.61	NA	NA	0% (0/14)	0.0016279	2.79	NA	NA
19	9.22	GO:0050665	hydrogen peroxide biosynthetic process	The chemical reactions and pathways resulting in the formation of hydrogen peroxide (H2O2), a potentially harmful byproduct of aerobic cellular respiration which can cause damage to DNA.	13.333% (2/15)	0.00561972	2.25	ENSG00000040531;ENSG00000165168	CTNS;CYBB	0% (0/15)	0.00397229	2.4	NA	NA	0% (0/15)	0.00645875	2.19	NA	NA	0% (0/15)	0.00461001	2.34	NA	NA	0% (0/15)	0.00602775	2.22	NA	NA
19	7.5	GO:0006809	nitric oxide biosynthetic process	The chemical reactions and pathways resulting in the formation of nitric oxide, nitrogen monoxide (NO), a colorless gas only slightly soluble in water.	28.169% (20/71)	0.167168	0.78	NA	NA	8.451% (6/71)	0.0868064	1.06	NA	NA	0% (0/71)	0.0039405	2.4	NA	NA	8.451% (6/71)	0.00110359	2.96	ENSG00000088986;ENSG00000131979;ENSG00000135218;ENSG00000136634;ENSG00000187554;ENSG00000198929	DYNLL1;GCH1;CD36;IL10;TLR5;NOS1AP	0% (0/71)	0.00354868	2.45	NA	NA
20	9.22	GO:0043923	positive regulation by host of viral transcription	Any process in which a host organism activates or increases the frequency, rate or extent of viral transcription, the synthesis of either RNA on a template of DNA or DNA on a template of RNA.	11.111% (2/18)	0.0128217	1.89	NA	NA	0% (0/18)	0.00447386	2.35	NA	NA	0% (0/18)	0.00643733	2.19	NA	NA	0% (0/18)	0.00508135	2.29	NA	NA	0% (0/18)	0.00611468	2.21	NA	NA
20	10.7	GO:0075525	viral translational termination-reinitiation	A process which occurs as part of viral mRNA translation which allows expression of a downstream open reading frame (ORF) in a dicistronic mRNA. In this process, ribosomes translate the upstream ORF but following termination, a proportion of 40S subunits remain tethered to the mRNA and go on to re-initiate translation at the start codon of the downstream ORF.	20% (1/5)	0.0619967	1.21	NA	NA	0% (0/5)	0.00991593	2	NA	NA	0% (0/5)	0.0114092	1.94	NA	NA	0% (0/5)	0.0103853	1.98	NA	NA	0% (0/5)	0.0111807	1.95	NA	NA
20	8.81	GO:0019082	viral protein processing	Any protein maturation process achieved by the cleavage of a peptide bond or bonds within a viral protein.	29.032% (9/31)	0.171753	0.77	NA	NA	6.452% (2/31)	0.0110427	1.96	NA	NA	0% (0/31)	0.00172222	2.76	NA	NA	3.226% (1/31)	0.00418928	2.38	ENSG00000138496	PARP9	0% (0/31)	0.00158929	2.8	NA	NA
20	7.81	GO:0019083	viral transcription	The process by which a viral genome, or part of a viral genome, is transcribed within the host cell.	9.434% (5/53)	0.00279755	2.55	ENSG00000067066;ENSG00000099956;ENSG00000116478;ENSG00000135272;ENSG00000136807	SP100;SMARCB1;HDAC1;MDFIC;CDK9	3.774% (2/53)	0.226689	0.64	NA	NA	0% (0/53)	0.089691	1.05	NA	NA	3.774% (2/53)	0.135082	0.87	NA	NA	0% (0/53)	0.08384	1.08	NA	NA
20	7.3	GO:0019080	viral gene expression	A process by which a viral gene is converted into a mature gene product or products (proteins or RNA). This includes viral transcription, processing to produce a mature RNA product, and viral translation.	18.447% (19/103)	0.0634134	1.2	NA	NA	3.883% (4/103)	0.00639704	2.19	ENSG00000067066;ENSG00000113712;ENSG00000135272;ENSG00000138496	SP100;CSNK1A1;MDFIC;PARP9	0% (0/103)	0.0130301	1.89	NA	NA	3.883% (4/103)	0.0371424	1.43	NA	NA	0% (0/103)	0.0117286	1.93	NA	NA
20	7.35	GO:0170038	proteinogenic amino acid biosynthetic process	NA	18.182% (10/55)	0.0128807	1.89	NA	NA	1.818% (1/55)	0.00734893	2.13	ENSG00000179918	SEPHS2	1.818% (1/55)	0.022612	1.65	NA	NA	1.818% (1/55)	0.00919411	2.04	ENSG00000179918	SEPHS2	0% (0/55)	0.00885854	2.05	NA	NA
20	7.34	GO:0170041	non-proteinogenic amino acid metabolic process	NA	14.706% (10/68)	0.0275146	1.56	NA	NA	5.882% (4/68)	0.0037836	2.42	ENSG00000079215;ENSG00000118520;ENSG00000129521;ENSG00000165092	SLC1A3;ARG1;EGLN3;ALDH1A1	1.471% (1/68)	0.016586	1.78	NA	NA	1.471% (1/68)	0.0110704	1.96	NA	NA	1.471% (1/68)	0.0155493	1.81	NA	NA
20	8.37	GO:0141137	positive regulation of gene expression, epigenetic	NA	18.182% (8/44)	0.0208989	1.68	NA	NA	2.273% (1/44)	0.00657273	2.18	ENSG00000136504	KAT7	0% (0/44)	0.00450686	2.35	NA	NA	4.545% (2/44)	0.0196015	1.71	NA	NA	0% (0/44)	0.00412605	2.38	NA	NA
20	3.88	GO:0141124	intracellular signaling cassette	NA	19.355% (360/1860)	0.0104835	1.98	NA	NA	5.645% (105/1860)	0.00297501	2.53	ENSG00000009694;ENSG00000012223;ENSG00000018625;ENSG00000026508;ENSG00000055208;ENSG00000055332;ENSG00000055732;ENSG00000068024;ENSG00000068305;ENSG00000078589;ENSG00000078747;ENSG00000081479;ENSG00000087589;ENSG00000091436;ENSG00000099250;ENSG00000102900;ENSG00000105939;ENSG00000107290;ENSG00000108861;ENSG00000108984;ENSG00000111961;ENSG00000112062;ENSG00000112414;ENSG00000113448;ENSG00000113712…	TENM1;LTF;ATP1A2;CD44;TAB2;EIF2AK2;MCOLN3;HDAC4;MEF2A;P2RY10;ITCH;LRP2;CASS4;MAP3K20;NRP1;NUP93;ZC3HAV1;SETX;DUSP3;MAP2K6;SASH1;MAPK14;ADGRG6;PDE4D;CSNK1A1;ACVR1;SOS1;GADD45A;PRDX1;TEK;TRIM25;TRIM6;CCR2;ACVR2A;PTGFR;RAB9B;EDN3;RHOT1;GNAI1;DOCK4;GDF15;AKAP12;PPARG;TRIM22;CHI3L1;LAMTOR5;APLNR;ARHGAP32;P2RX4;CD36;MDFIC;GPR55;SERPINE2;TXN;CASP1;UACA;ARHGAP24;HERC5;PDE5A;SLC39A8;LPAR6;NOL3;RGL1;ANK2;T…	0.376% (7/1860)	1.92e-05	4.72	ENSG00000026103;ENSG00000081189;ENSG00000107968;ENSG00000138670;ENSG00000153064;ENSG00000162924;ENSG00000186716	FAS;MEF2C;MAP3K8;RASGEF1B;BANK1;REL;BCR	3.71% (69/1860)	0.00443912	2.35	ENSG00000012223;ENSG00000055208;ENSG00000055732;ENSG00000056586;ENSG00000072274;ENSG00000078589;ENSG00000089041;ENSG00000091436;ENSG00000100387;ENSG00000105939;ENSG00000106462;ENSG00000108861;ENSG00000108984;ENSG00000112062;ENSG00000112290;ENSG00000113319;ENSG00000116717;ENSG00000117228;ENSG00000117450;ENSG00000119326;ENSG00000121797;ENSG00000122420;ENSG00000122641;ENSG00000124225;ENSG00000125249…	LTF;TAB2;MCOLN3;RC3H2;TFRC;P2RY10;P2RX7;MAP3K20;RBX1;ZC3HAV1;EZH2;DUSP3;MAP2K6;MAPK14;WASF1;RASGRF2;GADD45A;GBP1;PRDX1;CTNNAL1;CCRL2;PTGFR;INHBA;PMEPA1;RAP2A;ATG14;RHOT1;GDF15;ARHGAP32;CD36;EDAR;TXN;CASP1;FGF2;NOL3;TIFA;MFHAS1;CDKN2A;ITGB1;ABTB3;AKAP6;PDE3B;CLIC2;NRG1;KIT;TAB3;AMFR;CDC42EP3;S100A12;AIM2;CGAS;TERF2IP;ADAM9;C3AR1;NUDT4;TMEM9B;MCTP1;ERFE;TSPYL5;SIAH2;CCR3;NOG;TLE1;CD2AP;ASPH;NOS1AP;…	1.129% (21/1860)	0.000144058	3.84	ENSG00000012124;ENSG00000012223;ENSG00000078589;ENSG00000081189;ENSG00000116574;ENSG00000122641;ENSG00000124225;ENSG00000125249;ENSG00000134242;ENSG00000134909;ENSG00000135077;ENSG00000138670;ENSG00000147889;ENSG00000150093;ENSG00000151320;ENSG00000153064;ENSG00000164056;ENSG00000172071;ENSG00000172232;ENSG00000177455;ENSG00000196781	CD22;LTF;P2RY10;MEF2C;RHOU;INHBA;PMEPA1;RAP2A;PTPN22;ARHGAP32;HAVCR2;RASGEF1B;CDKN2A;ITGB1;AKAP6;BANK1;SPRY1;EIF2AK3;AZU1;CD19;TLE1
20	5.74	GO:0140694	non-membrane-bounded organelle assembly	NA	12.658% (50/395)	0.0705158	1.15	NA	NA	1.519% (6/395)	0.00247754	2.61	ENSG00000068305;ENSG00000086065;ENSG00000105048;ENSG00000127831;ENSG00000155657;ENSG00000182810	MEF2A;CHMP5;TNNT1;VIL1;TTN;DDX28	0.253% (1/395)	0.00827802	2.08	ENSG00000128872	TMOD2	2.278% (9/395)	0.0156009	1.81	NA	NA	0.759% (3/395)	0.00605248	2.22	ENSG00000139174;ENSG00000150093;ENSG00000229474	PRICKLE1;ITGB1;PATL2
20	9.91	GO:0160063	multi-pass transmembrane protein insertion into ER membrane	NA	0% (0/9)	0.00618909	2.21	NA	NA	0% (0/9)	0.0141688	1.85	NA	NA	0% (0/9)	0.0160053	1.8	NA	NA	0% (0/9)	0.0148779	1.83	NA	NA	0% (0/9)	0.0157598	1.8	NA	NA
20	5.6	GO:0141091	transforming growth factor beta receptor superfamily signaling pathway	NA	15.543% (53/341)	0.00124017	2.91	ENSG00000023734;ENSG00000053108;ENSG00000072401;ENSG00000073712;ENSG00000081479;ENSG00000100614;ENSG00000101938;ENSG00000102054;ENSG00000104299;ENSG00000105429;ENSG00000105855;ENSG00000106799;ENSG00000108389;ENSG00000109332;ENSG00000115170;ENSG00000115221;ENSG00000116478;ENSG00000121989;ENSG00000122176;ENSG00000122641;ENSG00000123610;ENSG00000126106;ENSG00000129757;ENSG00000130513;ENSG00000131023…	STRAP;FSTL4;UBE2D1;FERMT2;LRP2;PPM1A;CHRDL1;RBBP7;INTS9;MEGF8;ITGB8;TGFBR1;MTMR4;UBE2D3;ACVR1;ITGB6;HDAC1;ACVR2A;FMOD;INHBA;TNFAIP6;TMEM53;CDKN1C;GDF15;LATS1;PPARG;USP15;SKIL;NUMA1;FBN2;ARK2C;PARP1;GDF7;CDKN2B;CRB2;ADAM17;PELO;RNF111;NFIA;GPR155;TGFBR2;SAP30;CITED2;HTRA1;ADAM9;ZEB2;HTRA3;GREM2;NOG;SLC2A10;ADAMTSL2;BMPR2;ZNF8	5.279% (18/341)	0.171959	0.76	NA	NA	0.293% (1/341)	0.143748	0.84	NA	NA	2.933% (10/341)	0.25998	0.59	NA	NA	2.639% (9/341)	0.303592	0.52	NA	NA
20	7.34	GO:0170034	L-amino acid biosynthetic process	NA	17.857% (10/56)	0.00926843	2.03	ENSG00000065154;ENSG00000120053;ENSG00000125166;ENSG00000126522;ENSG00000143811;ENSG00000176974;ENSG00000179918;ENSG00000182199;ENSG00000182551;ENSG00000228716	OAT;GOT1;GOT2;ASL;PYCR2;SHMT1;SEPHS2;SHMT2;ADI1;DHFR	1.786% (1/56)	0.00507333	2.29	ENSG00000179918	SEPHS2	1.786% (1/56)	0.0202611	1.69	NA	NA	1.786% (1/56)	0.006414	2.19	ENSG00000179918	SEPHS2	0% (0/56)	0.00788476	2.1	NA	NA
21	6.79	GO:0030203	glycosaminoglycan metabolic process	The chemical reactions and pathways involving glycosaminoglycans, any of a group of polysaccharides that contain amino sugars.	20.536% (23/112)	0.149141	0.83	NA	NA	4.464% (5/112)	0.00669029	2.17	ENSG00000026508;ENSG00000123610;ENSG00000147408;ENSG00000154188;ENSG00000169826	CD44;TNFAIP6;CSGALNACT1;ANGPT1;CSGALNACT2	0% (0/112)	0.0353025	1.45	NA	NA	0.893% (1/112)	0.340017	0.47	NA	NA	0.893% (1/112)	0.0968739	1.01	NA	NA
21	7.09	GO:1903510	mucopolysaccharide metabolic process	NA	22.826% (21/92)	0.50786	0.29	NA	NA	5.435% (5/92)	0.0353608	1.45	NA	NA	0% (0/92)	0.00366711	2.44	NA	NA	1.087% (1/92)	0.00143308	2.84	ENSG00000138685	FGF2	0% (0/92)	0.00303409	2.52	NA	NA
21	8.97	GO:0030213	hyaluronan biosynthetic process	The chemical reactions and pathways resulting in the formation of hyaluronan, the naturally occurring anionic form of hyaluronic acid, any member of a group of glycosaminoglycans, the repeat units of which consist of beta-1,4 linked D-glucuronyl-beta-(1,3)-N-acetyl-D-glucosamine.	7.143% (1/14)	0.0028462	2.55	ENSG00000125538	IL1B	0% (0/14)	0.00345934	2.46	NA	NA	0% (0/14)	0.00486748	2.31	NA	NA	0% (0/14)	0.00389183	2.41	NA	NA	0% (0/14)	0.00463327	2.33	NA	NA
21	7.31	GO:0006024	glycosaminoglycan biosynthetic process	The chemical reactions and pathways resulting in the formation of glycosaminoglycans, any of a group of polysaccharides that contain amino sugars.	19.178% (14/73)	0.238137	0.62	NA	NA	4.11% (3/73)	0.0487552	1.31	NA	NA	0% (0/73)	0.0157916	1.8	NA	NA	0% (0/73)	0.00727481	2.14	NA	NA	1.37% (1/73)	0.0280885	1.55	NA	NA
21	4.9	GO:1901361	organic cyclic compound catabolic process	NA	17.185% (105/611)	0.00363818	2.44	ENSG00000004939;ENSG00000005007;ENSG00000006744;ENSG00000009307;ENSG00000026025;ENSG00000037474;ENSG00000054118;ENSG00000056586;ENSG00000066044;ENSG00000067900;ENSG00000068024;ENSG00000075239;ENSG00000076242;ENSG00000083896;ENSG00000089041;ENSG00000099622;ENSG00000100292;ENSG00000100697;ENSG00000102543;ENSG00000103150;ENSG00000103415;ENSG00000103485;ENSG00000104889;ENSG00000105939;ENSG00000106605…	SLC4A1;UPF1;ELAC2;CSDE1;VIM;NSUN2;THRAP3;RC3H2;ELAVL1;ROCK1;HDAC4;ACAT1;MLH1;YTHDC1;P2RX7;CIRBP;HMOX1;DICER1;CDADC1;MLYCD;HMOX2;QPRT;RNASEH2A;ZC3HAV1;BLVRA;CPEB3;ZPR1;IFNG;MAPK14;VNN1;PDE8B;CNOT6;HGD;XRN1;KAT2B;NFE2L2;SMG7;PPP1R8;ALDH6A1;EPHX2;GOT2;FXR2;LSM4;EXOSC2;DKC1;RIDA;AMPD3;ROCK2;LDHA;PAN2;IER3;KYAT3;LARP1B;EIF4A3;AKT1;VPS54;ALDH1L1;SRD5A1;PNRC1;CDKN2A;YTHDF1;HNMT;PELO;ENPP3;ELOC;HK1;SMG1;…	3.928% (24/611)	0.0569547	1.24	NA	NA	0.491% (3/611)	0.0620819	1.21	NA	NA	3.437% (21/611)	0.0129807	1.89	NA	NA	0.655% (4/611)	0.0283507	1.55	NA	NA
21	8.64	GO:0006706	steroid catabolic process	The chemical reactions and pathways resulting in the breakdown of steroids, compounds with a 1,2,cyclopentanoperhydrophenanthrene nucleus.	4.167% (1/24)	0.0100727	2	NA	NA	4.167% (1/24)	0.00289155	2.54	ENSG00000145545	SRD5A1	0% (0/24)	0.00114721	2.94	NA	NA	8.333% (2/24)	0.0124612	1.9	NA	NA	0% (0/24)	0.00106014	2.97	NA	NA
21	8.64	GO:0009310	amine catabolic process	The chemical reactions and pathways resulting in the breakdown of any organic compound that is weakly basic in character and contains an amino or a substituted amino group. Amines are called primary, secondary, or tertiary according to whether one, two, or three carbon atoms are attached to the nitrogen atom.	27.778% (5/18)	0.112813	0.95	NA	NA	11.111% (2/18)	0.0306554	1.51	NA	NA	0% (0/18)	0.0118551	1.93	NA	NA	5.556% (1/18)	0.00895913	2.05	ENSG00000189221	MAOA	0% (0/18)	0.0111851	1.95	NA	NA
21	4.2	GO:1901565	organonitrogen compound catabolic process	NA	18.647% (259/1389)	6.2e-05	4.21	ENSG00000001084;ENSG00000004897;ENSG00000004939;ENSG00000006118;ENSG00000007944;ENSG00000008438;ENSG00000010671;ENSG00000011275;ENSG00000013275;ENSG00000013561;ENSG00000019995;ENSG00000026508;ENSG00000034677;ENSG00000034713;ENSG00000049759;ENSG00000051108;ENSG00000054983;ENSG00000056586;ENSG00000057757;ENSG00000058668;ENSG00000063978;ENSG00000065154;ENSG00000067900;ENSG00000068024;ENSG00000068878…	GCLC;CDC27;SLC4A1;TMEM132A;MYLIP;PGLYRP1;BTK;RNF216;PSMC4;RNF14;ZRANB1;CD44;RNF19A;GABARAPL2;NEDD4L;HERPUD1;GALC;RC3H2;PITHD1;ATP2B4;RNF4;OAT;ROCK1;HDAC4;PSME4;NEDD4;UFD1;SLC44A1;UBE2D1;TRHDE;FBXW11;ACAT1;TRAF4;USP33;UBE2A;MCCC1;FAP;ACER3;UBE2K;NRDC;ITCH;TP53INP2;HSP90AA1;PCNP;ARG2;LRP2;GSK3B;CHMP5;P2RX7;ANAPC5;IRAK3;CDC23;WAC;KLHL22;GGT5;HMOX1;RBX1;DESI1;GZMB;TRIM9;PSMC6;PSMA3;PSMA6;TRPC4AP;USP1…	3.6% (50/1389)	0.00107734	2.97	ENSG00000026508;ENSG00000064886;ENSG00000068024;ENSG00000070214;ENSG00000078098;ENSG00000078747;ENSG00000078804;ENSG00000081479;ENSG00000086065;ENSG00000100902;ENSG00000110042;ENSG00000110200;ENSG00000111144;ENSG00000112299;ENSG00000113231;ENSG00000113448;ENSG00000113712;ENSG00000113924;ENSG00000116044;ENSG00000118520;ENSG00000119711;ENSG00000121060;ENSG00000128268;ENSG00000130164;ENSG00000130340…	CD44;CHI3L2;HDAC4;SLC44A1;FAP;ITCH;TP53INP2;LRP2;CHMP5;PSMA6;DTX4;ANAPC15;LTA4H;VNN1;PDE8B;PDE4D;CSNK1A1;HGD;NFE2L2;ARG1;ALDH6A1;TRIM25;MGAT3;LDLR;SNX9;RIDA;CHI3L1;CHIT1;LDHA;FBXL8;SERPINE2;HERC6;HERC5;PDE5A;HDC;RNF217;ADRA2A;AMN1;CAPN2;DISC1;HPRT1;IFI27;ADAM9;HINT1;SH3RF3;FBXO39;UPP1;MAOA;UBE2J1;FBXO48	0.288% (4/1389)	0.000174977	3.76	ENSG00000117009;ENSG00000120053;ENSG00000152556;ENSG00000174080	KMO;GOT1;PFKM;CTSF	2.952% (41/1389)	0.00533478	2.27	ENSG00000001084;ENSG00000004897;ENSG00000013561;ENSG00000034713;ENSG00000048140;ENSG00000049759;ENSG00000056586;ENSG00000072657;ENSG00000078124;ENSG00000089041;ENSG00000099910;ENSG00000100387;ENSG00000103316;ENSG00000104219;ENSG00000111144;ENSG00000112335;ENSG00000114166;ENSG00000126088;ENSG00000134333;ENSG00000135318;ENSG00000136634;ENSG00000138376;ENSG00000138685;ENSG00000141034;ENSG00000141622…	GCLC;CDC27;RNF14;GABARAPL2;TSPAN17;NEDD4L;RC3H2;TRHDE;ACER3;P2RX7;KLHL22;RBX1;CRYM;ZDHHC2;LTA4H;SNX3;KAT2B;UROD;LDHA;NT5E;IL10;BARD1;FGF2;GID4;ARK2C;RNF217;CDKN2A;ANKRD9;HK1;AMFR;WDR26;IFI27;ADAM9;BPGM;NUDT4;UBE2C;SIAH2;UBE2H;MAOA;CD2AP;PNP	0.432% (6/1389)	0.000373782	3.43	ENSG00000112812;ENSG00000117009;ENSG00000135318;ENSG00000139174;ENSG00000141622;ENSG00000147889	PRSS16;KMO;NT5E;PRICKLE1;ARK2C;CDKN2A
21	8.23	GO:0042219	cellular modified amino acid catabolic process	The chemical reactions and pathways resulting in the breakdown of compounds derived from amino acids, organic acids containing one or more amino substituents.	13.333% (4/30)	0.0117097	1.93	NA	NA	0% (0/30)	0.00104443	2.98	NA	NA	0% (0/30)	0.00193604	2.71	NA	NA	0% (0/30)	0.00127092	2.9	NA	NA	0% (0/30)	0.00177858	2.75	NA	NA
21	5.89	GO:1901136	carbohydrate derivative catabolic process	NA	13.91% (37/266)	0.00760261	2.12	ENSG00000004939;ENSG00000008438;ENSG00000010671;ENSG00000026508;ENSG00000054983;ENSG00000068024;ENSG00000075239;ENSG00000089041;ENSG00000102543;ENSG00000103150;ENSG00000111537;ENSG00000111885;ENSG00000112299;ENSG00000113231;ENSG00000114166;ENSG00000133048;ENSG00000133063;ENSG00000133805;ENSG00000134333;ENSG00000137331;ENSG00000152642;ENSG00000156515;ENSG00000160883;ENSG00000165092;ENSG00000165140…	SLC4A1;PGLYRP1;BTK;CD44;GALC;HDAC4;ACAT1;P2RX7;CDADC1;MLYCD;IFNG;MAN1A1;VNN1;PDE8B;KAT2B;CHI3L1;CHIT1;AMPD3;LDHA;IER3;GPD1L;HK1;HK3;ALDH1A1;FBP1;HPRT1;HINT1;GUSB;BPGM;HPSE;NUDT4;MAN1B1;UPP1;DPYD;PNP;HEXA;NUDT3	5.263% (14/266)	0.00409819	2.39	ENSG00000026508;ENSG00000064886;ENSG00000068024;ENSG00000112299;ENSG00000113231;ENSG00000113448;ENSG00000133048;ENSG00000133063;ENSG00000134333;ENSG00000138735;ENSG00000165092;ENSG00000165704;ENSG00000169567;ENSG00000183696	CD44;CHI3L2;HDAC4;VNN1;PDE8B;PDE4D;CHI3L1;CHIT1;LDHA;PDE5A;ALDH1A1;HPRT1;HINT1;UPP1	0.376% (1/266)	0.00196023	2.71	ENSG00000152556	PFKM	3.383% (9/266)	0.0206905	1.68	NA	NA	0.376% (1/266)	0.00662702	2.18	ENSG00000135318	NT5E
21	4.19	GO:1901135	carbohydrate derivative metabolic process	NA	17.956% (195/1086)	0.193199	0.71	NA	NA	4.236% (46/1086)	0.10966	0.96	NA	NA	0.092% (1/1086)	0.124113	0.91	NA	NA	2.21% (24/1086)	0.00775378	2.11	ENSG00000028839;ENSG00000089041;ENSG00000111726;ENSG00000114166;ENSG00000116199;ENSG00000124172;ENSG00000134333;ENSG00000134851;ENSG00000135318;ENSG00000138685;ENSG00000148154;ENSG00000154027;ENSG00000156136;ENSG00000156515;ENSG00000157404;ENSG00000158089;ENSG00000162433;ENSG00000172331;ENSG00000173598;ENSG00000173852;ENSG00000179104;ENSG00000182389;ENSG00000196407;ENSG00000198805	TBPL1;P2RX7;CMAS;KAT2B;FAM20B;ATP5F1E;LDHA;TMEM165;NT5E;FGF2;UGCG;AK5;DCK;HK1;KIT;GALNT14;AK4;BPGM;NUDT4;DPY19L1;TMTC2;CACNB4;THEM5;PNP	0.276% (3/1086)	0.0405745	1.39	NA	NA
21	9.09	GO:0030214	hyaluronan catabolic process	The chemical reactions and pathways resulting in the breakdown of hyaluronan, the naturally occurring anionic form of hyaluronic acid, any member of a group of glycosaminoglycans, the repeat units of which consist of beta-1,4 linked D-glucuronyl-beta-(1,3)-N-acetyl-D-glucosamine.	18.75% (3/16)	0.00365043	2.44	ENSG00000026508;ENSG00000169919;ENSG00000213614	CD44;GUSB;HEXA	6.25% (1/16)	0.015308	1.82	NA	NA	0% (0/16)	0.00451909	2.34	NA	NA	6.25% (1/16)	0.00902578	2.04	ENSG00000138685	FGF2	0% (0/16)	0.0042981	2.37	NA	NA
21	9.82	GO:0006032	chitin catabolic process	The chemical reactions and pathways resulting in the breakdown of chitin, a linear polysaccharide consisting of beta-(1->4)-linked N-acetyl-D-glucosamine residues.	33.333% (2/6)	0.188521	0.72	NA	NA	50% (3/6)	0.751091	0.12	NA	NA	0% (0/6)	0.00696088	2.16	NA	NA	0% (0/6)	0.00619578	2.21	NA	NA	0% (0/6)	0.00678844	2.17	NA	NA
22	6.34	GO:0016051	carbohydrate biosynthetic process	The chemical reactions and pathways resulting in the formation of carbohydrates, any of a group of organic compounds based of the general formula Cx(H2O)y.	15.196% (31/204)	0.0441726	1.35	NA	NA	4.412% (9/204)	0.023873	1.62	NA	NA	0.49% (1/204)	0.000295009	3.53	ENSG00000120053	GOT1	1.961% (4/204)	0.000149659	3.82	ENSG00000114166;ENSG00000116678;ENSG00000163754;ENSG00000178752	KAT2B;LEPR;GYG1;ERFE	0% (0/204)	0.00218215	2.66	NA	NA
22	7.24	GO:0006094	gluconeogenesis	The formation of glucose from noncarbohydrate precursors, such as pyruvate, amino acids and glycerol.	10.465% (9/86)	0.00302044	2.52	ENSG00000100075;ENSG00000109819;ENSG00000114166;ENSG00000116678;ENSG00000120053;ENSG00000165140;ENSG00000176444;ENSG00000178752;ENSG00000196636	SLC25A1;PPARGC1A;KAT2B;LEPR;GOT1;FBP1;CLK2;ERFE;SDHAF3	1.163% (1/86)	0.00716693	2.14	ENSG00000196636	SDHAF3	1.163% (1/86)	0.0317282	1.5	NA	NA	3.488% (3/86)	0.0324169	1.49	NA	NA	0% (0/86)	0.0154525	1.81	NA	NA
22	7.16	GO:0046364	monosaccharide biosynthetic process	The chemical reactions and pathways resulting in the formation of monosaccharides, polyhydric alcohols containing either an aldehyde or a keto group and between three to ten or more carbon atoms.	10.753% (10/93)	0.357897	0.45	NA	NA	1.075% (1/93)	0.203388	0.69	NA	NA	1.075% (1/93)	0.0176666	1.75	NA	NA	3.226% (3/93)	0.0172489	1.76	NA	NA	0% (0/93)	0.00830109	2.08	NA	NA
22	8.62	GO:0009313	oligosaccharide catabolic process	The chemical reactions and pathways resulting in the breakdown of oligosaccharides, molecules with between two and (about) 20 monosaccharide residues connected by glycosidic linkages.	6.667% (1/15)	0.00926286	2.03	ENSG00000257335	MGAM	6.667% (1/15)	0.0803557	1.09	NA	NA	0% (0/15)	0.0259551	1.59	NA	NA	0% (0/15)	0.0231193	1.64	NA	NA	0% (0/15)	0.0253829	1.6	NA	NA
22	6.46	GO:0006006	glucose metabolic process	The chemical reactions and pathways involving glucose, the aldohexose gluco-hexose. D-glucose is dextrorotatory and is sometimes known as dextrose; it is an important source of energy for living organisms and is found free as well as combined in homo- and hetero-oligosaccharides and polysaccharides.	14.516% (27/186)	0.00279928	2.55	ENSG00000007350;ENSG00000076555;ENSG00000100075;ENSG00000103150;ENSG00000109819;ENSG00000112062;ENSG00000114166;ENSG00000116285;ENSG00000116678;ENSG00000120053;ENSG00000141682;ENSG00000141753;ENSG00000142208;ENSG00000156515;ENSG00000156873;ENSG00000158715;ENSG00000160883;ENSG00000165140;ENSG00000165434;ENSG00000168291;ENSG00000176444;ENSG00000178752;ENSG00000187486;ENSG00000189058;ENSG00000196636…	TKTL1;ACACB;SLC25A1;MLYCD;PPARGC1A;MAPK14;KAT2B;ERRFI1;LEPR;GOT1;PMAIP1;IGFBP4;AKT1;HK1;PHKG2;SLC45A3;HK3;FBP1;PGM2L1;PDHB;CLK2;ERFE;KCNJ11;APOD;SDHAF3;TSTD1;PPP1R3G	2.151% (4/186)	0.00215683	2.67	ENSG00000112062;ENSG00000143891;ENSG00000196636;ENSG00000219607	MAPK14;GALM;SDHAF3;PPP1R3G	1.075% (2/186)	7.08e-05	4.15	ENSG00000120053;ENSG00000152556	GOT1;PFKM	3.763% (7/186)	0.000154069	3.81	ENSG00000007350;ENSG00000112062;ENSG00000114166;ENSG00000116678;ENSG00000156515;ENSG00000165434;ENSG00000178752	TKTL1;MAPK14;KAT2B;LEPR;HK1;PGM2L1;ERFE	0% (0/186)	0.000513751	3.29	NA	NA
22	8.15	GO:0019320	hexose catabolic process	The chemical reactions and pathways resulting in the breakdown of hexose, any monosaccharide with a chain of six carbon atoms in the molecule.	9.302% (4/43)	0.00620698	2.21	ENSG00000007350;ENSG00000156515;ENSG00000160883;ENSG00000196371	TKTL1;HK1;HK3;FUT4	2.326% (1/43)	0.473073	0.33	NA	NA	2.326% (1/43)	0.0856583	1.07	NA	NA	4.651% (2/43)	0.10533	0.98	NA	NA	0% (0/43)	0.48799	0.31	NA	NA
22	8.67	GO:0006007	glucose catabolic process	The chemical reactions and pathways resulting in the breakdown of glucose, the aldohexose gluco-hexose.	11.538% (3/26)	0.0104504	1.98	NA	NA	0% (0/26)	0.153601	0.81	NA	NA	3.846% (1/26)	0.0296426	1.53	NA	NA	7.692% (2/26)	0.0545261	1.26	NA	NA	0% (0/26)	0.00880059	2.06	NA	NA
22	7.21	GO:0032963	collagen metabolic process	The chemical reactions and pathways involving collagen, any of a group of fibrous proteins of very high tensile strength that form the main component of connective tissue in animals. Collagen is highly enriched in glycine (some regions are 33% glycine) and proline, occurring predominantly as 3-hydroxyproline (about 20%).	17.647% (18/102)	0.0041868	2.38	ENSG00000026025;ENSG00000078098;ENSG00000089041;ENSG00000090530;ENSG00000094975;ENSG00000099953;ENSG00000102760;ENSG00000110811;ENSG00000118113;ENSG00000122641;ENSG00000130635;ENSG00000132170;ENSG00000141570;ENSG00000141699;ENSG00000149257;ENSG00000150093;ENSG00000166173;ENSG00000167711	VIM;FAP;P2RX7;P3H2;SUCO;MMP11;RGCC;P3H3;MMP8;INHBA;COL5A1;PPARG;CBX8;RETREG3;SERPINH1;ITGB1;LARP6;SERPINF2	2.941% (3/102)	0.00955539	2.02	ENSG00000078098;ENSG00000118113;ENSG00000132170	FAP;MMP8;PPARG	0% (0/102)	0.0144314	1.84	NA	NA	5.882% (6/102)	0.0265213	1.58	NA	NA	2.941% (3/102)	0.020664	1.68	NA	NA
22	8.32	GO:0032964	collagen biosynthetic process	The chemical reactions and pathways resulting in the formation of collagen, any of a group of fibrous proteins of very high tensile strength that form the main component of connective tissue in animals. Collagen is highly enriched in glycine (some regions are 33% glycine) and proline, occurring predominantly as 3-hydroxyproline (about 20%).	25% (11/44)	0.283731	0.55	NA	NA	2.273% (1/44)	0.00263631	2.58	ENSG00000132170	PPARG	0% (0/44)	0.00232814	2.63	NA	NA	2.273% (1/44)	0.00343907	2.46	ENSG00000122641	INHBA	2.273% (1/44)	0.00562423	2.25	ENSG00000122641	INHBA
22	7.21	GO:0046148	pigment biosynthetic process	The chemical reactions and pathways resulting in the formation of a pigment, any general or particular coloring matter in living organisms, e.g. melanin.	21.429% (12/56)	0.00516796	2.29	ENSG00000040531;ENSG00000066926;ENSG00000080819;ENSG00000110911;ENSG00000130770;ENSG00000135776;ENSG00000137210;ENSG00000151012;ENSG00000158578;ENSG00000164175;ENSG00000165060;ENSG00000169554	CTNS;FECH;CPOX;SLC11A2;ATP5IF1;ABCB10;TMEM14B;SLC7A11;ALAS2;SLC45A2;FXN;ZEB2	3.571% (2/56)	0.00423836	2.37	ENSG00000080819;ENSG00000151012	CPOX;SLC7A11	0% (0/56)	0.00578512	2.24	NA	NA	8.929% (5/56)	0.0073606	2.13	ENSG00000080819;ENSG00000126088;ENSG00000135776;ENSG00000137210;ENSG00000151012	CPOX;UROD;ABCB10;TMEM14B;SLC7A11	0% (0/56)	0.00552507	2.26	NA	NA
22	5.88	GO:0032259	methylation	The process in which a methyl group is covalently attached to a molecule.	16.342% (42/257)	0.000478448	3.32	ENSG00000007372;ENSG00000010165;ENSG00000037474;ENSG00000053328;ENSG00000057657;ENSG00000071462;ENSG00000100483;ENSG00000101945;ENSG00000103037;ENSG00000106462;ENSG00000108592;ENSG00000111641;ENSG00000120265;ENSG00000121486;ENSG00000126749;ENSG00000132275;ENSG00000136932;ENSG00000141644;ENSG00000142208;ENSG00000143799;ENSG00000143919;ENSG00000143977;ENSG00000145391;ENSG00000146834;ENSG00000149480…	PAX6;METTL13;NSUN2;METTL24;PRDM1;BUD23;VCPKMT;SUV39H1;SETD6;EZH2;FTSJ3;NOP2;PCMT1;TRMT1L;EMG1;RRP8;TRMO;MBD1;AKT1;PARP1;CAMKMT;SNRPG;SETD7;MEPCE;MTA2;HNMT;TRMT44;RBM15;METTL2B;NSD1;LCMT2;TMT1B;RAB6A;SHMT2;TRMT2B;MPHOSPH8;METTL9;SPOUT1;EHMT2;TRMT9B;FDXACB1;RBM15B	1.946% (5/257)	0.00307809	2.51	ENSG00000057657;ENSG00000120265;ENSG00000145391;ENSG00000197006;ENSG00000250305	PRDM1;PCMT1;SETD7;METTL9;TRMT9B	0% (0/257)	0.0052966	2.28	NA	NA	1.167% (3/257)	0.00219058	2.66	ENSG00000106462;ENSG00000120265;ENSG00000197006	EZH2;PCMT1;METTL9	0% (0/257)	0.00453073	2.34	NA	NA
22	6.52	GO:1990845	adaptive thermogenesis	NA	22.941% (39/170)	0.112365	0.95	NA	NA	3.529% (6/170)	0.0105881	1.98	NA	NA	0.588% (1/170)	0.203717	0.69	NA	NA	2.941% (5/170)	0.00342125	2.47	ENSG00000108984;ENSG00000116678;ENSG00000135218;ENSG00000144407;ENSG00000148346	MAP2K6;LEPR;CD36;PTH2R;LCN2	0.588% (1/170)	0.195215	0.71	NA	NA
22	8.43	GO:0018904	ether metabolic process	The chemical reactions and pathways involving organic ethers, any anhydride of the general formula R1-O-R2, formed between two identical or nonidentical organic hydroxy compounds.	30.769% (8/26)	0.0735191	1.13	NA	NA	0% (0/26)	0.0778425	1.11	NA	NA	0% (0/26)	0.10001	1	NA	NA	7.692% (2/26)	0.00586576	2.23	ENSG00000111666;ENSG00000144959	CHPT1;NCEH1	0% (0/26)	0.0970414	1.01	NA	NA
22	3.52	GO:0044281	small molecule metabolic process	The chemical reactions and pathways involving small molecules, any low molecular weight, monomeric, non-encoded molecule.	16.732% (301/1799)	0.13838	0.86	NA	NA	3.78% (68/1799)	0.00616196	2.21	ENSG00000018625;ENSG00000023909;ENSG00000065911;ENSG00000068024;ENSG00000079215;ENSG00000081479;ENSG00000094963;ENSG00000099377;ENSG00000111144;ENSG00000112062;ENSG00000112299;ENSG00000113231;ENSG00000113448;ENSG00000113520;ENSG00000113924;ENSG00000115425;ENSG00000117791;ENSG00000118520;ENSG00000119013;ENSG00000119537;ENSG00000119711;ENSG00000129521;ENSG00000130164;ENSG00000132170;ENSG00000132541…	ATP1A2;GCLM;MTHFD2;HDAC4;SLC1A3;LRP2;FMO2;HSD3B7;LTA4H;MAPK14;VNN1;PDE8B;PDE4D;IL4;HGD;PECR;MTARC2;ARG1;NDUFB3;KDSR;ALDH6A1;EGLN3;LDLR;PPARG;RIDA;CMPK2;LDHA;ANXA1;CD36;CASP1;CYP1B1;PARP9;PDE5A;SLC39A8;HDC;MGST3;DEGS1;GALM;SRD5A1;CSGALNACT1;PDSS1;ADM;SLC7A11;PID1;AK5;SLC16A1;AK4;DHRS3;COQ8A;GUCY1A1;ACSL6;ALDH1A1;HPRT1;ATP5MG;HINT1;P2RY6;SPTLC3;GLRX;SEPHS2;CACNB4;UPP1;NDUFA12;SDHAF3;MT-ND6;PPP1R3G;…	0.222% (4/1799)	0.000932121	3.03	ENSG00000104325;ENSG00000117009;ENSG00000120053;ENSG00000152556	DECR1;KMO;GOT1;PFKM	2.613% (47/1799)	0.00263396	2.58	ENSG00000001084;ENSG00000005381;ENSG00000007350;ENSG00000023909;ENSG00000028839;ENSG00000052802;ENSG00000065911;ENSG00000076043;ENSG00000078124;ENSG00000079215;ENSG00000089041;ENSG00000103316;ENSG00000111144;ENSG00000111666;ENSG00000111726;ENSG00000112062;ENSG00000114166;ENSG00000116678;ENSG00000118777;ENSG00000124172;ENSG00000131979;ENSG00000133742;ENSG00000134333;ENSG00000135218;ENSG00000135318…	GCLC;MPO;TKTL1;GCLM;TBPL1;MSMO1;MTHFD2;REXO2;ACER3;SLC1A3;P2RX7;CRYM;LTA4H;CHPT1;CMAS;MAPK14;KAT2B;LEPR;ABCG2;ATP5F1E;GCH1;CA1;LDHA;CD36;NT5E;CASP1;PARP9;NCEH1;SRD5A1;SLC7A11;AK5;SLC16A1;DCK;HK1;KIT;AK4;DHRS3;SGPP2;PGM2L1;BPGM;NUDT4;ERFE;SEPHS2;CACNB4;THEM5;PNP;NAIP	0.222% (4/1799)	0.000532073	3.27	ENSG00000005381;ENSG00000023909;ENSG00000117009;ENSG00000135318	MPO;GCLM;KMO;NT5E
22	5.04	GO:0044283	small molecule biosynthetic process	The chemical reactions and pathways resulting in the formation of small molecules, any low molecular weight, monomeric, non-encoded molecule.	15.763% (93/590)	0.0251835	1.6	NA	NA	3.22% (19/590)	0.00346443	2.46	ENSG00000079215;ENSG00000099377;ENSG00000111144;ENSG00000115425;ENSG00000135046;ENSG00000137752;ENSG00000143198;ENSG00000143753;ENSG00000148459;ENSG00000148926;ENSG00000163050;ENSG00000165092;ENSG00000165704;ENSG00000171631;ENSG00000172296;ENSG00000179918;ENSG00000196636;ENSG00000242110;ENSG00000249437	SLC1A3;HSD3B7;LTA4H;PECR;ANXA1;CASP1;MGST3;DEGS1;PDSS1;ADM;COQ8A;ALDH1A1;HPRT1;P2RY6;SPTLC3;SEPHS2;SDHAF3;AMACR;NAIP	0.339% (2/590)	0.000400699	3.4	ENSG00000117009;ENSG00000120053	KMO;GOT1	2.373% (14/590)	0.00131099	2.88	ENSG00000005381;ENSG00000052802;ENSG00000078124;ENSG00000079215;ENSG00000111144;ENSG00000114166;ENSG00000116678;ENSG00000131979;ENSG00000135318;ENSG00000137752;ENSG00000178752;ENSG00000179918;ENSG00000198805;ENSG00000249437	MPO;MSMO1;ACER3;SLC1A3;LTA4H;KAT2B;LEPR;GCH1;NT5E;CASP1;ERFE;SEPHS2;PNP;NAIP	0.508% (3/590)	0.00157163	2.8	ENSG00000005381;ENSG00000117009;ENSG00000135318	MPO;KMO;NT5E
22	9.82	GO:0006776	vitamin A metabolic process	The chemical reactions and pathways involving any of the vitamin A compounds, retinol, retinal (retinaldehyde) and retinoic acid, all of which are derivatives of beta-carotene.	12.5% (1/8)	0.0106759	1.97	NA	NA	0% (0/8)	0.00326744	2.49	NA	NA	0% (0/8)	0.00423491	2.37	NA	NA	0% (0/8)	0.00358132	2.45	NA	NA	0% (0/8)	0.00407809	2.39	NA	NA
22	7.69	GO:0006775	fat-soluble vitamin metabolic process	The chemical reactions and pathways involving of any of a diverse group of vitamins that are soluble in organic solvents and relatively insoluble in water.	10.87% (5/46)	0.0040291	2.39	ENSG00000081479;ENSG00000111537;ENSG00000128918;ENSG00000140459;ENSG00000167397	LRP2;IFNG;ALDH1A2;CYP11A1;VKORC1	2.174% (1/46)	0.0542554	1.27	NA	NA	0% (0/46)	0.0318394	1.5	NA	NA	0% (0/46)	0.0258126	1.59	NA	NA	0% (0/46)	0.0305906	1.51	NA	NA
22	7.43	GO:0006767	water-soluble vitamin metabolic process	The chemical reactions and pathways involving any of a diverse group of vitamins that are soluble in water.	28.571% (18/63)	0.339417	0.47	NA	NA	3.175% (2/63)	0.0188842	1.72	NA	NA	0% (0/63)	0.00796435	2.1	NA	NA	4.762% (3/63)	0.044996	1.35	NA	NA	0% (0/63)	0.00722607	2.14	NA	NA
23	7.14	GO:0005977	glycogen metabolic process	The chemical reactions and pathways involving glycogen, a polydisperse, highly branched glucan composed of chains of D-glucose residues in alpha-(1->4) glycosidic linkage, joined together by alpha-(1->6) glycosidic linkages.	18.919% (14/74)	0.0211908	1.67	NA	NA	2.703% (2/74)	0.00281269	2.55	ENSG00000163754;ENSG00000219607	GYG1;PPP1R3G	1.351% (1/74)	0.00588771	2.23	ENSG00000152556	PFKM	4.054% (3/74)	0.0077368	2.11	ENSG00000116678;ENSG00000163754;ENSG00000213639	LEPR;GYG1;PPP1CB	0% (0/74)	0.00529758	2.28	NA	NA
23	7.04	GO:0031623	receptor internalization	A receptor-mediated endocytosis process that results in the movement of receptors from the plasma membrane to the inside of the cell. The process begins when cell surface receptors are monoubiquitinated following ligand-induced activation. Receptors are subsequently taken up into endocytic vesicles from where they are either targeted to the lysosome or vacuole for degradation or recycled back to …	19.531% (25/128)	0.0316438	1.5	NA	NA	5.469% (7/128)	0.00133547	2.87	ENSG00000078747;ENSG00000135218;ENSG00000148926;ENSG00000154188;ENSG00000155511;ENSG00000157168;ENSG00000197959	ITCH;CD36;ADM;ANGPT1;GRIA1;NRG1;DNM3	0% (0/128)	0.000829318	3.08	NA	NA	4.688% (6/128)	0.00659378	2.18	ENSG00000006125;ENSG00000072274;ENSG00000085832;ENSG00000135218;ENSG00000150093;ENSG00000157168	AP2B1;TFRC;EPS15;CD36;ITGB1;NRG1	0.781% (1/128)	0.00106114	2.97	ENSG00000150093	ITGB1
23	7.61	GO:0043112	receptor metabolic process	The chemical reactions and pathways involving a receptor molecule, a macromolecule that undergoes combination with a hormone, neurotransmitter, drug or intracellular messenger to initiate a change in cell function.	23.288% (17/73)	0.217361	0.66	NA	NA	6.849% (5/73)	0.035534	1.45	NA	NA	0% (0/73)	0.00371177	2.43	NA	NA	1.37% (1/73)	0.00543134	2.27	ENSG00000085832	EPS15	0% (0/73)	0.00341399	2.47	NA	NA
23	3.26	GO:0043412	macromolecule modification	The covalent alteration of one or more monomeric units in a polypeptide, polynucleotide, polysaccharide, or other biological macromolecule, resulting in a change in its properties.	18.719% (599/3200)	0.007661	2.12	ENSG00000001084;ENSG00000003096;ENSG00000004487;ENSG00000004897;ENSG00000007372;ENSG00000007944;ENSG00000009694;ENSG00000009954;ENSG00000010671;ENSG00000011275;ENSG00000011304;ENSG00000011485;ENSG00000012223;ENSG00000012963;ENSG00000012983;ENSG00000013561;ENSG00000019582;ENSG00000019995;ENSG00000026103;ENSG00000026508;ENSG00000033011;ENSG00000034677;ENSG00000035664;ENSG00000037280;ENSG00000037474…	GCLC;KLHL13;KDM1A;CDC27;PAX6;MYLIP;TENM1;BAZ1B;BTK;RNF216;PTBP1;PPP5C;LTF;UBR7;MAP4K5;RNF14;CD74;ZRANB1;FAS;CD44;ALG1;RNF19A;DAPK2;FLT4;NSUN2;DCUN1D1;JADE2;LCP2;NEDD4L;HERPUD1;TAB2;EIF2AK2;RC3H2;CDK14;PPP1R12A;ATP2B4;STYK1;WNK1;PIGV;LTK;RNF4;ST3GAL6;MYLK;CDK13;TIE1;FGFR2;FECH;PRKCZ;ROCK1;HDAC4;MAST4;NEDD4;MAPK6;ELP1;DAPP1;TMEM260;ST6GALNAC2;CFAP20;BUD23;TFRC;UBE2D1;FBXW11;ALPK1;FERMT2;ST6GAL1;TXK…	3.375% (108/3200)	0.0570394	1.24	NA	NA	0.219% (7/3200)	0.717048	0.14	NA	NA	2.844% (91/3200)	0.0665543	1.18	NA	NA	0.719% (23/3200)	0.712587	0.15	NA	NA
23	6.33	GO:0043414	macromolecule methylation	The covalent attachment of a methyl residue to one or more monomeric units in a polypeptide, polynucleotide, polysaccharide, or other biological macromolecule.	17.544% (30/171)	0.0338893	1.47	NA	NA	1.754% (3/171)	0.00319175	2.5	ENSG00000120265;ENSG00000145391;ENSG00000250305	PCMT1;SETD7;TRMT9B	0% (0/171)	0.00718197	2.14	NA	NA	1.17% (2/171)	0.00545056	2.26	ENSG00000106462;ENSG00000120265	EZH2;PCMT1	0% (0/171)	0.00555262	2.26	NA	NA
23	5.94	GO:0000209	protein polyubiquitination	Addition of multiple ubiquitin groups to a protein, forming a ubiquitin chain.	24.906% (66/265)	0.769741	0.11	NA	NA	3.774% (10/265)	0.00378332	2.42	ENSG00000078747;ENSG00000110042;ENSG00000111961;ENSG00000121060;ENSG00000121236;ENSG00000132274;ENSG00000138646;ENSG00000146373;ENSG00000165949;ENSG00000198833	ITCH;DTX4;SASH1;TRIM25;TRIM6;TRIM22;HERC5;RNF217;IFI27;UBE2J1	0% (0/265)	0.00820573	2.09	NA	NA	6.038% (16/265)	0.0860843	1.07	NA	NA	1.132% (3/265)	0.022904	1.64	NA	NA
23	7.46	GO:0070936	protein K48-linked ubiquitination	A protein ubiquitination process in which a polymer of ubiquitin, formed by linkages between lysine residues at position 48 of the ubiquitin monomers, is added to a protein. K48-linked ubiquitination targets the substrate protein for degradation.	34.146% (28/82)	0.662827	0.18	NA	NA	6.098% (5/82)	0.0103879	1.98	NA	NA	0% (0/82)	0.000948599	3.02	NA	NA	8.537% (7/82)	0.00315283	2.5	ENSG00000049759;ENSG00000100387;ENSG00000159461;ENSG00000165949;ENSG00000170035;ENSG00000175063;ENSG00000186591	NEDD4L;RBX1;AMFR;IFI27;UBE2E3;UBE2C;UBE2H	0% (0/82)	0.000879197	3.06	NA	NA
23	8.18	GO:0006513	protein monoubiquitination	Addition of a single ubiquitin group to a protein.	30.435% (14/46)	0.159014	0.8	NA	NA	6.522% (3/46)	0.000863078	3.06	ENSG00000078747;ENSG00000107954;ENSG00000121060	ITCH;NEURL1;TRIM25	0% (0/46)	9.16e-05	4.04	NA	NA	6.522% (3/46)	0.00214492	2.67	ENSG00000049759;ENSG00000099910;ENSG00000100387	NEDD4L;KLHL22;RBX1	0% (0/46)	8.58e-05	4.07	NA	NA
23	4.59	GO:0032446	protein modification by small protein conjugation	A protein modification process in which one or more groups of a small protein, such as ubiquitin or a ubiquitin-like protein, are covalently attached to a target protein.	20.238% (170/840)	0.123776	0.91	NA	NA	2.857% (24/840)	0.00374605	2.43	ENSG00000068024;ENSG00000078747;ENSG00000107954;ENSG00000110042;ENSG00000111961;ENSG00000114737;ENSG00000115267;ENSG00000116044;ENSG00000120833;ENSG00000121060;ENSG00000121236;ENSG00000132274;ENSG00000133169;ENSG00000138642;ENSG00000138646;ENSG00000146373;ENSG00000154188;ENSG00000165949;ENSG00000169330;ENSG00000172985;ENSG00000184557;ENSG00000184900;ENSG00000185880;ENSG00000198833	HDAC4;ITCH;NEURL1;DTX4;SASH1;CISH;IFIH1;NFE2L2;SOCS2;TRIM25;TRIM6;TRIM22;BEX1;HERC6;HERC5;RNF217;ANGPT1;IFI27;MINAR1;SH3RF3;SOCS3;SUMO3;TRIM69;UBE2J1	0% (0/840)	0.020527	1.69	NA	NA	3.333% (28/840)	0.18108	0.74	NA	NA	0.714% (6/840)	0.00254481	2.59	ENSG00000081377;ENSG00000133169;ENSG00000134242;ENSG00000139174;ENSG00000141622;ENSG00000147889	CDC14B;BEX1;PTPN22;PRICKLE1;ARK2C;CDKN2A
23	4.73	GO:0016567	protein ubiquitination	The process in which one or more ubiquitin groups are added to a protein.	20.106% (152/756)	0.219623	0.66	NA	NA	2.778% (21/756)	0.0429194	1.37	NA	NA	0% (0/756)	0.0735085	1.13	NA	NA	3.704% (28/756)	0.0023143	2.64	ENSG00000001084;ENSG00000003096;ENSG00000004897;ENSG00000013561;ENSG00000049759;ENSG00000056586;ENSG00000099910;ENSG00000100387;ENSG00000109906;ENSG00000122741;ENSG00000132964;ENSG00000133169;ENSG00000138376;ENSG00000140525;ENSG00000141622;ENSG00000146373;ENSG00000147889;ENSG00000156381;ENSG00000159461;ENSG00000165949;ENSG00000170035;ENSG00000175063;ENSG00000176871;ENSG00000179455;ENSG00000180543…	GCLC;KLHL13;CDC27;RNF14;NEDD4L;RC3H2;KLHL22;RBX1;ZBTB16;DCAF10;CDK8;BEX1;BARD1;FANCI;ARK2C;RNF217;CDKN2A;ANKRD9;AMFR;IFI27;UBE2E3;UBE2C;WSB2;MKRN3;TSPYL5;SIAH2;TRIM69;UBE2H	0.794% (6/756)	0.00125022	2.9	ENSG00000081377;ENSG00000133169;ENSG00000134242;ENSG00000139174;ENSG00000141622;ENSG00000147889	CDC14B;BEX1;PTPN22;PRICKLE1;ARK2C;CDKN2A
23	6.19	GO:0018108	peptidyl-tyrosine phosphorylation	The phosphorylation of peptidyl-tyrosine to form peptidyl-O4'-phospho-L-tyrosine.	18.919% (49/259)	0.0585401	1.23	NA	NA	5.405% (14/259)	0.00420338	2.38	ENSG00000026508;ENSG00000087589;ENSG00000099250;ENSG00000113520;ENSG00000115170;ENSG00000121594;ENSG00000135218;ENSG00000138496;ENSG00000150337;ENSG00000154188;ENSG00000155307;ENSG00000157168;ENSG00000157193;ENSG00000184557	CD44;CASS4;NRP1;IL4;ACVR1;CD80;CD36;PARP9;FCGR1A;ANGPT1;SAMSN1;NRG1;LRP8;SOCS3	0.386% (1/259)	0.00601863	2.22	ENSG00000153064	BANK1	2.317% (6/259)	0.00367159	2.44	ENSG00000135218;ENSG00000138496;ENSG00000150337;ENSG00000155307;ENSG00000157168;ENSG00000157404	CD36;PARP9;FCGR1A;SAMSN1;NRG1;KIT	1.544% (4/259)	0.00546458	2.26	ENSG00000114315;ENSG00000134242;ENSG00000153064;ENSG00000184349	HES1;PTPN22;BANK1;EFNA5
23	6.66	GO:0018105	peptidyl-serine phosphorylation	The phosphorylation of peptidyl-serine to form peptidyl-O-phospho-L-serine.	19.807% (41/207)	0.0484402	1.31	NA	NA	5.314% (11/207)	0.00251307	2.6	ENSG00000009694;ENSG00000026508;ENSG00000112062;ENSG00000113448;ENSG00000113712;ENSG00000116717;ENSG00000121236;ENSG00000136810;ENSG00000154188;ENSG00000156735;ENSG00000225830	TENM1;CD44;MAPK14;PDE4D;CSNK1A1;GADD45A;TRIM6;TXN;ANGPT1;BAG4;ERCC6	0% (0/207)	0.00447207	2.35	NA	NA	3.382% (7/207)	0.0109109	1.96	NA	NA	0.483% (1/207)	0.00366813	2.44	ENSG00000172071	EIF2AK3
23	4.3	GO:0006468	protein phosphorylation	The process of introducing a phosphate group on to a protein.	19.323% (257/1330)	0.000426898	3.37	ENSG00000007372;ENSG00000009694;ENSG00000010671;ENSG00000012223;ENSG00000012983;ENSG00000019582;ENSG00000026103;ENSG00000026508;ENSG00000035664;ENSG00000037280;ENSG00000043462;ENSG00000055208;ENSG00000055332;ENSG00000058091;ENSG00000058668;ENSG00000060140;ENSG00000060237;ENSG00000062524;ENSG00000065534;ENSG00000065883;ENSG00000066056;ENSG00000066468;ENSG00000066926;ENSG00000067606;ENSG00000067900…	PAX6;TENM1;BTK;LTF;MAP4K5;CD74;FAS;CD44;DAPK2;FLT4;LCP2;TAB2;EIF2AK2;CDK14;ATP2B4;STYK1;WNK1;LTK;MYLK;CDK13;TIE1;FGFR2;FECH;PRKCZ;ROCK1;MAST4;MAPK6;TFRC;ALPK1;FERMT2;TXK;MARK3;TRAF4;UBE2K;MKNK1;MOK;HSP90AA1;STK17B;GSK3B;EIF2AK1;CASS4;TPX2;P2RX7;IRAK3;MAP3K20;SRPK1;JAK2;OSM;PICK1;CTSG;CDKN3;SLC8A3;GSKIP;VRK1;ADNP;CDK5RAP1;RIOK3;TLR8;BMX;STK24;DNAJC3;RGCC;EEF2K;DNAJA3;NBN;STK3;PPP2R1A;JAK3;CDK6;EZH…	4.511% (60/1330)	1.89e-05	4.72	ENSG00000009694;ENSG00000012223;ENSG00000026508;ENSG00000055208;ENSG00000055332;ENSG00000065534;ENSG00000087589;ENSG00000091436;ENSG00000096063;ENSG00000099250;ENSG00000105810;ENSG00000108861;ENSG00000108950;ENSG00000108984;ENSG00000111961;ENSG00000112062;ENSG00000112655;ENSG00000113448;ENSG00000113520;ENSG00000113712;ENSG00000115170;ENSG00000116717;ENSG00000118515;ENSG00000120156;ENSG00000121236…	TENM1;LTF;CD44;TAB2;EIF2AK2;MYLK;CASS4;MAP3K20;SRPK1;NRP1;CDK6;DUSP3;FAM20A;MAP2K6;SASH1;MAPK14;PTK7;PDE4D;IL4;CSNK1A1;ACVR1;GADD45A;SGK1;TEK;TRIM6;CD80;ACVR2A;CDKN2C;EDN3;CDKN1C;SNX9;PPARG;CHI3L1;APLNR;CD36;TXN;PARP9;HERC5;CDKN2B;FCGR1A;ADRA2A;PID1;ANGPT1;SAMSN1;TTN;BAG4;NRG1;LRP8;JAK1;S100A12;CAMP;PXK;ADAM9;FAXDC2;SOCS3;ROR1;HLA-DRB1;ALPK2;GRK5;ERCC6	0.451% (6/1330)	6.36e-05	4.2	ENSG00000026103;ENSG00000107968;ENSG00000112655;ENSG00000120162;ENSG00000153064;ENSG00000186716	FAS;MAP3K8;PTK7;MOB3B;BANK1;BCR	3.459% (46/1330)	5.51e-06	5.26	ENSG00000012223;ENSG00000055208;ENSG00000058091;ENSG00000065883;ENSG00000072274;ENSG00000074966;ENSG00000088325;ENSG00000089041;ENSG00000091436;ENSG00000094804;ENSG00000096063;ENSG00000100448;ENSG00000106462;ENSG00000108861;ENSG00000108950;ENSG00000108984;ENSG00000112062;ENSG00000116678;ENSG00000116717;ENSG00000119630;ENSG00000122641;ENSG00000122966;ENSG00000125249;ENSG00000126775;ENSG00000132964…	LTF;TAB2;CDK14;CDK13;TFRC;TXK;TPX2;P2RX7;MAP3K20;CDC6;SRPK1;CTSG;EZH2;DUSP3;FAM20A;MAP2K6;MAPK14;LEPR;GADD45A;PGF;INHBA;CIT;RAP2A;ATG14;CDK8;CD36;TXN;PARP9;FGF2;CDKN2B;CDKN2A;FCGR1A;UHMK1;SAMSN1;NRG1;KIT;ERG;JAK1;S100A12;CAMP;TERF2IP;ADAM9;OXSR1;HEXIM1;TOP1;ERCC6	1.278% (17/1330)	4.26e-05	4.37	ENSG00000012223;ENSG00000074966;ENSG00000100448;ENSG00000114315;ENSG00000120162;ENSG00000122641;ENSG00000125249;ENSG00000129757;ENSG00000130413;ENSG00000134242;ENSG00000147889;ENSG00000153064;ENSG00000157554;ENSG00000164047;ENSG00000172071;ENSG00000172232;ENSG00000184349	LTF;TXK;CTSG;HES1;MOB3B;INHBA;RAP2A;CDKN1C;STK33;PTPN22;CDKN2A;BANK1;ERG;CAMP;EIF2AK3;AZU1;EFNA5
23	6.76	GO:0046777	protein autophosphorylation	The phosphorylation by a protein of one or more of its own amino acid residues (cis-autophosphorylation), or residues on an identical protein (trans-autophosphorylation).	21.505% (40/186)	0.0893028	1.05	NA	NA	2.151% (4/186)	0.000974578	3.01	ENSG00000055332;ENSG00000091436;ENSG00000157168;ENSG00000198873	EIF2AK2;MAP3K20;NRG1;GRK5	0% (0/186)	0.00111487	2.95	NA	NA	3.763% (7/186)	0.00271178	2.57	ENSG00000074966;ENSG00000091436;ENSG00000125249;ENSG00000152332;ENSG00000157168;ENSG00000157404;ENSG00000172939	TXK;MAP3K20;RAP2A;UHMK1;NRG1;KIT;OXSR1	2.151% (4/186)	0.00245074	2.61	ENSG00000074966;ENSG00000125249;ENSG00000130413;ENSG00000172071	TXK;RAP2A;STK33;EIF2AK3
23	10.11	GO:0034983	peptidyl-lysine deacetylation	The removal of an acetyl group from an acetylated lysine residue in a peptide or protein.	14.286% (1/7)	0.00507375	2.29	ENSG00000068024	HDAC4	14.286% (1/7)	0.00694367	2.16	ENSG00000068024	HDAC4	0% (0/7)	0.000521561	3.28	NA	NA	0% (0/7)	0.000487242	3.31	NA	NA	0% (0/7)	0.000513219	3.29	NA	NA
23	7.33	GO:0016925	protein sumoylation	The process in which a SUMO protein (small ubiquitin-related modifier) is conjugated to a target protein via an isopeptide bond between the carboxy-terminus of SUMO with an epsilon-amino group of a lysine residue of the target protein.	22.059% (15/68)	0.0905678	1.04	NA	NA	4.412% (3/68)	0.0238166	1.62	NA	NA	0% (0/68)	0.105429	0.98	NA	NA	1.471% (1/68)	0.00723749	2.14	ENSG00000147889	CDKN2A	1.471% (1/68)	0.0103909	1.98	NA	NA
23	6.65	GO:0018205	peptidyl-lysine modification	The modification of peptidyl-lysine.	17.857% (25/140)	0.00353264	2.45	ENSG00000068024;ENSG00000090432;ENSG00000100401;ENSG00000100418;ENSG00000100483;ENSG00000103037;ENSG00000103275;ENSG00000110811;ENSG00000114166;ENSG00000115267;ENSG00000116030;ENSG00000119231;ENSG00000133302;ENSG00000136504;ENSG00000140382;ENSG00000145391;ENSG00000147889;ENSG00000156831;ENSG00000168036;ENSG00000169567;ENSG00000172977;ENSG00000177688;ENSG00000184900;ENSG00000204371;ENSG00000255150	HDAC4;MUL1;RANGAP1;DESI1;VCPKMT;SETD6;UBE2I;P3H3;KAT2B;IFIH1;SUMO1;SENP5;SLF1;KAT7;HMG20A;SETD7;CDKN2A;NSMCE2;CTNNB1;HINT1;KAT5;SUMO4;SUMO3;EHMT2;EID3	4.286% (6/140)	0.000355285	3.45	ENSG00000068024;ENSG00000115267;ENSG00000136504;ENSG00000145391;ENSG00000169567;ENSG00000184900	HDAC4;IFIH1;KAT7;SETD7;HINT1;SUMO3	0% (0/140)	0.00284065	2.55	NA	NA	1.429% (2/140)	0.0053063	2.28	ENSG00000114166;ENSG00000147889	KAT2B;CDKN2A	0.714% (1/140)	0.000289269	3.54	ENSG00000147889	CDKN2A
23	6.61	GO:0018209	peptidyl-serine modification	The modification of peptidyl-serine.	19.178% (42/219)	0.0461118	1.34	NA	NA	5.023% (11/219)	0.33135	0.48	NA	NA	0% (0/219)	0.411529	0.39	NA	NA	3.196% (7/219)	0.00923368	2.03	ENSG00000072274;ENSG00000112062;ENSG00000116717;ENSG00000136810;ENSG00000152332;ENSG00000198900;ENSG00000225830	TFRC;MAPK14;GADD45A;TXN;UHMK1;TOP1;ERCC6	0.457% (1/219)	0.398713	0.4	NA	NA
23	6.3	GO:0006470	protein dephosphorylation	The process of removing one or more phosphoric residues from a protein.	18.721% (41/219)	0.0406706	1.39	NA	NA	1.826% (4/219)	0.00470796	2.33	ENSG00000108861;ENSG00000144724;ENSG00000147324;ENSG00000213949	DUSP3;PTPRG;MFHAS1;ITGA1	0.457% (1/219)	0.00243545	2.61	ENSG00000152894	PTPRK	2.74% (6/219)	0.0189084	1.72	NA	NA	1.37% (3/219)	0.00483179	2.32	ENSG00000081377;ENSG00000134242;ENSG00000152894	CDC14B;PTPN22;PTPRK
23	9.47	GO:0070262	peptidyl-serine dephosphorylation	The removal of phosphoric residues from peptidyl-O-phospho-L-serine to form peptidyl-serine.	14.286% (2/14)	0.0321492	1.49	NA	NA	0% (0/14)	0.00757928	2.12	NA	NA	0% (0/14)	0.0112333	1.95	NA	NA	0% (0/14)	0.00853156	2.07	NA	NA	0% (0/14)	0.0106014	1.97	NA	NA
23	6.52	GO:0070646	protein modification by small protein removal	A protein modification process in which one or more covalently attached groups of a small protein, such as ubiquitin or a ubiquitin-like protein, are removed from a target protein.	22.222% (28/126)	0.177446	0.75	NA	NA	3.175% (4/126)	0.00183243	2.74	ENSG00000078747;ENSG00000109189;ENSG00000169567;ENSG00000184979	ITCH;USP46;HINT1;USP18	0% (0/126)	0.00144471	2.84	NA	NA	0.794% (1/126)	0.000822195	3.09	ENSG00000154914	USP43	0% (0/126)	0.0011269	2.95	NA	NA
23	3.35	GO:0036211	protein modification process	The covalent alteration of one or more amino acids occurring in proteins, peptides and nascent polypeptides (co-translational, post-translational modifications). Includes the modification of charged tRNAs that are destined to occur in a protein (pre-translation modification).	19.065% (567/2974)	0.00182644	2.74	ENSG00000001084;ENSG00000003096;ENSG00000004487;ENSG00000004897;ENSG00000007372;ENSG00000007944;ENSG00000009694;ENSG00000009954;ENSG00000010671;ENSG00000011275;ENSG00000011304;ENSG00000011485;ENSG00000012223;ENSG00000012963;ENSG00000012983;ENSG00000013561;ENSG00000019582;ENSG00000019995;ENSG00000026103;ENSG00000026508;ENSG00000033011;ENSG00000034677;ENSG00000035664;ENSG00000037280;ENSG00000043093…	GCLC;KLHL13;KDM1A;CDC27;PAX6;MYLIP;TENM1;BAZ1B;BTK;RNF216;PTBP1;PPP5C;LTF;UBR7;MAP4K5;RNF14;CD74;ZRANB1;FAS;CD44;ALG1;RNF19A;DAPK2;FLT4;DCUN1D1;JADE2;LCP2;NEDD4L;HERPUD1;TAB2;EIF2AK2;RC3H2;CDK14;PPP1R12A;ATP2B4;STYK1;WNK1;PIGV;LTK;RNF4;ST3GAL6;MYLK;CDK13;TIE1;FGFR2;FECH;PRKCZ;ROCK1;HDAC4;MAST4;NEDD4;MAPK6;DAPP1;TMEM260;ST6GALNAC2;CFAP20;TFRC;UBE2D1;FBXW11;ALPK1;FERMT2;ST6GAL1;TXK;MARK3;TRAF4;USP3…	3.564% (106/2974)	0.0012788	2.89	ENSG00000009694;ENSG00000012223;ENSG00000026508;ENSG00000055208;ENSG00000055332;ENSG00000065534;ENSG00000068024;ENSG00000070269;ENSG00000070526;ENSG00000078747;ENSG00000087589;ENSG00000091436;ENSG00000096063;ENSG00000099250;ENSG00000105810;ENSG00000107954;ENSG00000108861;ENSG00000108950;ENSG00000108984;ENSG00000109189;ENSG00000110042;ENSG00000111912;ENSG00000111961;ENSG00000112062;ENSG00000112655…	TENM1;LTF;CD44;TAB2;EIF2AK2;MYLK;HDAC4;TMEM260;ST6GALNAC1;ITCH;CASS4;MAP3K20;SRPK1;NRP1;CDK6;NEURL1;DUSP3;FAM20A;MAP2K6;USP46;DTX4;NCOA7;SASH1;MAPK14;PTK7;PDE4D;IL4;CSNK1A1;CISH;ACVR1;IFIH1;NFE2L2;GADD45A;ST6GALNAC5;SGK1;TEK;PCMT1;SOCS2;TRIM25;TRIM6;CD80;ACVR2A;CDKN2C;EDN3;MGAT3;EGLN3;CDKN1C;SNX9;PPARG;TRIM22;CHI3L1;BEX1;APLNR;TMEM165;ANXA1;CD36;KAT7;TXN;PARP9;HERC6;HERC5;SLC39A8;S100A8;PTPRG;SET…	0.235% (7/2974)	0.000344192	3.46	ENSG00000026103;ENSG00000107968;ENSG00000112655;ENSG00000120162;ENSG00000152894;ENSG00000153064;ENSG00000186716	FAS;MAP3K8;PTK7;MOB3B;PTPRK;BANK1;BCR	3.06% (91/2974)	4.29e-06	5.37	ENSG00000001084;ENSG00000003096;ENSG00000004897;ENSG00000012223;ENSG00000013561;ENSG00000049759;ENSG00000055208;ENSG00000056586;ENSG00000058091;ENSG00000065883;ENSG00000072274;ENSG00000074966;ENSG00000088325;ENSG00000089041;ENSG00000091436;ENSG00000094804;ENSG00000096063;ENSG00000099910;ENSG00000100387;ENSG00000100448;ENSG00000104219;ENSG00000106462;ENSG00000108861;ENSG00000108950;ENSG00000108984…	GCLC;KLHL13;CDC27;LTF;RNF14;NEDD4L;TAB2;RC3H2;CDK14;CDK13;TFRC;TXK;TPX2;P2RX7;MAP3K20;CDC6;SRPK1;KLHL22;RBX1;CTSG;ZDHHC2;EZH2;DUSP3;FAM20A;MAP2K6;ZBTB16;NCOA7;MAPK14;KAT2B;TTL;LEPR;GADD45A;PGF;PCMT1;INHBA;DCAF10;CIT;RAP2A;ATG14;CDK8;BEX1;TMEM165;CD36;TXN;BARD1;PARP9;FGF2;FANCI;ARK2C;S100A8;ACP1;RNF217;MFHAS1;CDKN2B;CDKN2A;UGCG;FCGR1A;UHMK1;PTPRK;USP43;SAMSN1;ANKRD9;NRG1;KIT;ERG;PTPDC1;GALNT14;AMF…	0.773% (23/2974)	4.11e-05	4.39	ENSG00000012223;ENSG00000074966;ENSG00000081377;ENSG00000100448;ENSG00000114315;ENSG00000120162;ENSG00000122641;ENSG00000125249;ENSG00000129757;ENSG00000130413;ENSG00000133169;ENSG00000133424;ENSG00000134242;ENSG00000139174;ENSG00000141622;ENSG00000147889;ENSG00000152894;ENSG00000153064;ENSG00000157554;ENSG00000164047;ENSG00000172071;ENSG00000172232;ENSG00000184349	LTF;TXK;CDC14B;CTSG;HES1;MOB3B;INHBA;RAP2A;CDKN1C;STK33;BEX1;LARGE1;PTPN22;PRICKLE1;ARK2C;CDKN2A;PTPRK;BANK1;ERG;CAMP;EIF2AK3;AZU1;EFNA5
23	4.42	GO:0043687	post-translational protein modification	The process of covalently altering one or more amino acids in a protein after the protein has been completely translated and released from the ribosome.	20.425% (202/989)	0.0538945	1.27	NA	NA	2.73% (27/989)	0.00562001	2.25	ENSG00000068024;ENSG00000078747;ENSG00000107954;ENSG00000109189;ENSG00000110042;ENSG00000111961;ENSG00000114737;ENSG00000115267;ENSG00000116044;ENSG00000120833;ENSG00000121060;ENSG00000121236;ENSG00000132274;ENSG00000133169;ENSG00000138642;ENSG00000138646;ENSG00000146373;ENSG00000154188;ENSG00000165949;ENSG00000169330;ENSG00000169567;ENSG00000172985;ENSG00000184557;ENSG00000184900;ENSG00000184979…	HDAC4;ITCH;NEURL1;USP46;DTX4;SASH1;CISH;IFIH1;NFE2L2;SOCS2;TRIM25;TRIM6;TRIM22;BEX1;HERC6;HERC5;RNF217;ANGPT1;IFI27;MINAR1;HINT1;SH3RF3;SOCS3;SUMO3;USP18;TRIM69;UBE2J1	0% (0/989)	0.00322847	2.49	NA	NA	3.033% (30/989)	0.0170312	1.77	NA	NA	0.708% (7/989)	0.0274222	1.56	NA	NA
24	6.51	GO:0045732	positive regulation of protein catabolic process	Any process that activates or increases the frequency, rate or extent of the chemical reactions and pathways resulting in the breakdown of a protein by the destruction of the native, active configuration, with or without the hydrolysis of peptide bonds.	18.692% (40/214)	0.003951	2.4	ENSG00000001084;ENSG00000007944;ENSG00000013275;ENSG00000013561;ENSG00000034677;ENSG00000049759;ENSG00000051108;ENSG00000069869;ENSG00000078618;ENSG00000078747;ENSG00000080824;ENSG00000081479;ENSG00000082701;ENSG00000100387;ENSG00000100519;ENSG00000109670;ENSG00000111537;ENSG00000113712;ENSG00000116030;ENSG00000116044;ENSG00000118503;ENSG00000118564;ENSG00000125538;ENSG00000130164;ENSG00000130340…	GCLC;MYLIP;PSMC4;RNF14;RNF19A;NEDD4L;HERPUD1;NEDD4;NRDC;ITCH;HSP90AA1;LRP2;GSK3B;RBX1;PSMC6;FBXW7;IFNG;CSNK1A1;SUMO1;NFE2L2;TNFAIP3;FBXL5;IL1B;LDLR;SNX9;IER3;BARD1;CUL4A;DET1;AKT1;DCAF1;RNF217;LPCAT1;VCP;ADAM9;SH3RF3;ARIH2;RNF41;BCAP31;PABIR1	4.673% (10/214)	0.00278106	2.56	ENSG00000078747;ENSG00000081479;ENSG00000113712;ENSG00000116044;ENSG00000130164;ENSG00000130340;ENSG00000146373;ENSG00000150594;ENSG00000168615;ENSG00000172985	ITCH;LRP2;CSNK1A1;NFE2L2;LDLR;SNX9;RNF217;ADRA2A;ADAM9;SH3RF3	0% (0/214)	0.00081218	3.09	NA	NA	3.271% (7/214)	0.00196507	2.71	ENSG00000001084;ENSG00000013561;ENSG00000049759;ENSG00000100387;ENSG00000138376;ENSG00000146373;ENSG00000168615	GCLC;RNF14;NEDD4L;RBX1;BARD1;RNF217;ADAM9	0.467% (1/214)	0.000656422	3.18	ENSG00000139174	PRICKLE1
24	5.92	GO:0042176	regulation of protein catabolic process	Any process that modulates the frequency, rate or extent of the chemical reactions and pathways resulting in the breakdown of a protein by the destruction of the native, active configuration, with or without the hydrolysis of peptide bonds.	19.241% (71/369)	0.0995639	1	NA	NA	3.252% (12/369)	0.00385433	2.41	ENSG00000078747;ENSG00000081479;ENSG00000113712;ENSG00000116044;ENSG00000128268;ENSG00000130164;ENSG00000130340;ENSG00000135919;ENSG00000146373;ENSG00000150594;ENSG00000168615;ENSG00000172985	ITCH;LRP2;CSNK1A1;NFE2L2;MGAT3;LDLR;SNX9;SERPINE2;RNF217;ADRA2A;ADAM9;SH3RF3	0% (0/369)	0.00249603	2.6	NA	NA	3.252% (12/369)	0.00966301	2.01	ENSG00000001084;ENSG00000013561;ENSG00000034713;ENSG00000048140;ENSG00000049759;ENSG00000100387;ENSG00000104219;ENSG00000112335;ENSG00000136634;ENSG00000138376;ENSG00000146373;ENSG00000168615	GCLC;RNF14;GABARAPL2;TSPAN17;NEDD4L;RBX1;ZDHHC2;SNX3;IL10;BARD1;RNF217;ADAM9	0.271% (1/369)	0.00188141	2.73	ENSG00000139174	PRICKLE1
24	6.63	GO:2000058	regulation of ubiquitin-dependent protein catabolic process	NA	19.209% (34/177)	0.128602	0.89	NA	NA	2.825% (5/177)	0.00820489	2.09	ENSG00000113712;ENSG00000116044;ENSG00000146373;ENSG00000162946;ENSG00000172985	CSNK1A1;NFE2L2;RNF217;DISC1;SH3RF3	0% (0/177)	0.00520361	2.28	NA	NA	2.825% (5/177)	0.0138993	1.86	NA	NA	1.13% (2/177)	0.0100398	2	NA	NA
24	6.53	GO:0061136	regulation of proteasomal protein catabolic process	Any process that modulates the rate, frequency, or extent of the chemical reactions and pathways resulting in the breakdown of a protein or peptide by hydrolysis of its peptide bonds that is mediated by the proteasome.	18.367% (36/196)	0.0270629	1.57	NA	NA	2.041% (4/196)	0.00614785	2.21	ENSG00000113712;ENSG00000116044;ENSG00000146373;ENSG00000172985	CSNK1A1;NFE2L2;RNF217;SH3RF3	0% (0/196)	0.0197911	1.7	NA	NA	2.551% (5/196)	0.0169708	1.77	NA	NA	0.51% (1/196)	0.0168347	1.77	NA	NA
24	6.32	GO:1903050	regulation of proteolysis involved in protein catabolic process	NA	18.22% (43/236)	0.0206611	1.68	NA	NA	2.119% (5/236)	0.100845	1	NA	NA	0% (0/236)	0.0324025	1.49	NA	NA	2.542% (6/236)	0.00690844	2.16	ENSG00000001084;ENSG00000013561;ENSG00000034713;ENSG00000100387;ENSG00000146373;ENSG00000147889	GCLC;RNF14;GABARAPL2;RBX1;RNF217;CDKN2A	0.847% (2/236)	0.00913034	2.04	ENSG00000139174;ENSG00000147889	PRICKLE1;CDKN2A
24	7.11	GO:1901800	positive regulation of proteasomal protein catabolic process	NA	17.094% (20/117)	0.0233505	1.63	NA	NA	3.419% (4/117)	0.00102507	2.99	ENSG00000113712;ENSG00000116044;ENSG00000146373;ENSG00000172985	CSNK1A1;NFE2L2;RNF217;SH3RF3	0% (0/117)	0.000993327	3	NA	NA	3.419% (4/117)	0.00461202	2.34	ENSG00000001084;ENSG00000013561;ENSG00000100387;ENSG00000146373	GCLC;RNF14;RBX1;RNF217	0.855% (1/117)	0.000911426	3.04	ENSG00000139174	PRICKLE1
24	10.36	GO:1904352	positive regulation of protein catabolic process in the vacuole	NA	33.333% (2/6)	0.180251	0.74	NA	NA	33.333% (2/6)	0.276531	0.56	NA	NA	0% (0/6)	0.00631044	2.2	NA	NA	0% (0/6)	0.00562036	2.25	NA	NA	0% (0/6)	0.00616337	2.21	NA	NA
24	9.01	GO:0006515	protein quality control for misfolded or incompletely synthesized proteins	The chemical reactions and pathways resulting in the breakdown of misfolded or attenuated proteins.	20% (4/20)	0.0960723	1.02	NA	NA	0% (0/20)	0.00696134	2.16	NA	NA	0% (0/20)	0.0115068	1.94	NA	NA	0% (0/20)	0.00814095	2.09	NA	NA	0% (0/20)	0.0107712	1.97	NA	NA
24	5.13	GO:0006511	ubiquitin-dependent protein catabolic process	The chemical reactions and pathways resulting in the breakdown of a protein or peptide by hydrolysis of its peptide bonds, initiated by the covalent attachment of a ubiquitin group, or multiple ubiquitin groups, to the protein.	20.812% (123/591)	0.00254196	2.59	ENSG00000001084;ENSG00000004897;ENSG00000007944;ENSG00000011275;ENSG00000013275;ENSG00000013561;ENSG00000019995;ENSG00000034677;ENSG00000049759;ENSG00000051108;ENSG00000056586;ENSG00000063978;ENSG00000069869;ENSG00000070010;ENSG00000072401;ENSG00000072803;ENSG00000076604;ENSG00000077254;ENSG00000077721;ENSG00000078140;ENSG00000078747;ENSG00000078804;ENSG00000081154;ENSG00000082701;ENSG00000086065…	GCLC;CDC27;MYLIP;RNF216;PSMC4;RNF14;ZRANB1;RNF19A;NEDD4L;HERPUD1;RC3H2;RNF4;NEDD4;UFD1;UBE2D1;FBXW11;TRAF4;USP33;UBE2A;UBE2K;ITCH;TP53INP2;PCNP;GSK3B;CHMP5;ANAPC5;CDC23;WAC;KLHL22;RBX1;DESI1;TRIM9;PSMC6;PSMA3;PSMA6;TRPC4AP;USP14;MIB1;UBE2I;UBE2W;RNF43;UBE2D3;FBXW7;DTX4;ANAPC15;BIRC2;KCTD10;FBXL4;FAF2;SKP1;CSNK1A1;RNF7;SUMO1;NFE2L2;RNF146;FBXL5;UBE2B;RAD23B;TRIM25;SPOP;RNF11;WWP1;RNF114;KLHDC3;RPL…	3.215% (19/591)	6.53e-05	4.19	ENSG00000078747;ENSG00000078804;ENSG00000086065;ENSG00000100902;ENSG00000110042;ENSG00000110200;ENSG00000113712;ENSG00000116044;ENSG00000121060;ENSG00000135722;ENSG00000138642;ENSG00000138646;ENSG00000146373;ENSG00000151743;ENSG00000162946;ENSG00000165949;ENSG00000172985;ENSG00000177294;ENSG00000204923	ITCH;TP53INP2;CHMP5;PSMA6;DTX4;ANAPC15;CSNK1A1;NFE2L2;TRIM25;FBXL8;HERC6;HERC5;RNF217;AMN1;DISC1;IFI27;SH3RF3;FBXO39;FBXO48	0% (0/591)	1.55e-05	4.81	NA	NA	2.876% (17/591)	1.47e-05	4.83	ENSG00000001084;ENSG00000004897;ENSG00000013561;ENSG00000049759;ENSG00000056586;ENSG00000099910;ENSG00000100387;ENSG00000141034;ENSG00000146373;ENSG00000147889;ENSG00000156381;ENSG00000159461;ENSG00000162923;ENSG00000165949;ENSG00000175063;ENSG00000181788;ENSG00000186591	GCLC;CDC27;RNF14;NEDD4L;RC3H2;KLHL22;RBX1;GID4;RNF217;CDKN2A;ANKRD9;AMFR;WDR26;IFI27;UBE2C;SIAH2;UBE2H	0.338% (2/591)	1.46e-05	4.83	ENSG00000139174;ENSG00000147889	PRICKLE1;CDKN2A
24	5.72	GO:0043161	proteasome-mediated ubiquitin-dependent protein catabolic process	The chemical reactions and pathways resulting in the breakdown of a protein or peptide by hydrolysis of its peptide bonds, initiated by the covalent attachment of ubiquitin, and mediated by the proteasome.	22.111% (88/398)	0.0634074	1.2	NA	NA	3.266% (13/398)	6.19e-06	5.21	ENSG00000078747;ENSG00000100902;ENSG00000110042;ENSG00000110200;ENSG00000113712;ENSG00000116044;ENSG00000135722;ENSG00000146373;ENSG00000151743;ENSG00000165949;ENSG00000172985;ENSG00000177294;ENSG00000204923	ITCH;PSMA6;DTX4;ANAPC15;CSNK1A1;NFE2L2;FBXL8;RNF217;AMN1;IFI27;SH3RF3;FBXO39;FBXO48	0% (0/398)	2.04e-06	5.69	NA	NA	3.518% (14/398)	1.94e-05	4.71	ENSG00000001084;ENSG00000004897;ENSG00000013561;ENSG00000049759;ENSG00000099910;ENSG00000100387;ENSG00000141034;ENSG00000146373;ENSG00000156381;ENSG00000162923;ENSG00000165949;ENSG00000175063;ENSG00000181788;ENSG00000186591	GCLC;CDC27;RNF14;NEDD4L;KLHL22;RBX1;GID4;RNF217;ANKRD9;WDR26;IFI27;UBE2C;SIAH2;UBE2H	0.251% (1/398)	1.6e-05	4.8	ENSG00000139174	PRICKLE1
24	7.85	GO:0031146	SCF-dependent proteasomal ubiquitin-dependent protein catabolic process	The chemical reactions and pathways resulting in the breakdown of a protein or peptide by hydrolysis of its peptide bonds, initiated by the covalent attachment of ubiquitin, with ubiquitin-protein ligation catalyzed by an SCF (Skp1/Cul1/F-box protein) complex, and mediated by the proteasome.	19.565% (9/46)	0.117857	0.93	NA	NA	8.696% (4/46)	0.0265575	1.58	NA	NA	0% (0/46)	0.0105324	1.98	NA	NA	2.174% (1/46)	0.0144889	1.84	NA	NA	0% (0/46)	0.00938484	2.03	NA	NA
24	9.82	GO:0002084	protein depalmitoylation	The removal of palymitoyl groups from a lipoprotein.	0% (0/7)	0.00385162	2.41	NA	NA	0% (0/7)	0.0112013	1.95	NA	NA	0% (0/7)	0.0140906	1.85	NA	NA	0% (0/7)	0.0121282	1.92	NA	NA	0% (0/7)	0.0136344	1.87	NA	NA
24	8.87	GO:0061684	chaperone-mediated autophagy	The autophagy process which begins when chaperones and co-chaperones recognize a target motif and unfold the substrate protein. The proteins are then transported to the lysosome where they are degraded.	13.333% (2/15)	0.0203978	1.69	NA	NA	0% (0/15)	0.00535274	2.27	NA	NA	0% (0/15)	0.00818124	2.09	NA	NA	0% (0/15)	0.00609323	2.22	NA	NA	0% (0/15)	0.00768926	2.11	NA	NA
24	4.6	GO:0030163	protein catabolic process	The chemical reactions and pathways resulting in the breakdown of a protein by the destruction of the native, active configuration, with or without the hydrolysis of peptide bonds.	19.624% (188/958)	0.00276267	2.56	ENSG00000001084;ENSG00000004897;ENSG00000006118;ENSG00000007944;ENSG00000010671;ENSG00000011275;ENSG00000013275;ENSG00000013561;ENSG00000019995;ENSG00000034677;ENSG00000034713;ENSG00000049759;ENSG00000051108;ENSG00000056586;ENSG00000057757;ENSG00000063978;ENSG00000067900;ENSG00000068878;ENSG00000069869;ENSG00000070010;ENSG00000072401;ENSG00000072803;ENSG00000076604;ENSG00000077254;ENSG00000077721…	GCLC;CDC27;TMEM132A;MYLIP;BTK;RNF216;PSMC4;RNF14;ZRANB1;RNF19A;GABARAPL2;NEDD4L;HERPUD1;RC3H2;PITHD1;RNF4;ROCK1;PSME4;NEDD4;UFD1;UBE2D1;FBXW11;TRAF4;USP33;UBE2A;FAP;UBE2K;NRDC;ITCH;TP53INP2;HSP90AA1;PCNP;LRP2;GSK3B;CHMP5;P2RX7;ANAPC5;IRAK3;CDC23;WAC;KLHL22;RBX1;DESI1;GZMB;TRIM9;PSMC6;PSMA3;PSMA6;TRPC4AP;USP14;MIB1;DNAJC3;LONP2;UBE2I;ZDHHC2;UBE2W;RNF43;CDK5RAP3;UBE2D3;FBXW7;DTX4;PRPF19;ANAPC15;BIR…	3.027% (29/958)	0.00209346	2.68	ENSG00000078098;ENSG00000078747;ENSG00000078804;ENSG00000081479;ENSG00000086065;ENSG00000100902;ENSG00000110042;ENSG00000110200;ENSG00000113712;ENSG00000116044;ENSG00000121060;ENSG00000128268;ENSG00000130164;ENSG00000130340;ENSG00000135722;ENSG00000135919;ENSG00000138642;ENSG00000138646;ENSG00000146373;ENSG00000150594;ENSG00000151743;ENSG00000162909;ENSG00000162946;ENSG00000165949;ENSG00000168615…	FAP;ITCH;TP53INP2;LRP2;CHMP5;PSMA6;DTX4;ANAPC15;CSNK1A1;NFE2L2;TRIM25;MGAT3;LDLR;SNX9;FBXL8;SERPINE2;HERC6;HERC5;RNF217;ADRA2A;AMN1;CAPN2;DISC1;IFI27;ADAM9;SH3RF3;FBXO39;UBE2J1;FBXO48	0.104% (1/958)	0.0345634	1.46	NA	NA	2.818% (27/958)	0.0751566	1.12	NA	NA	0.418% (4/958)	0.104555	0.98	NA	NA
24	9.31	GO:0042159	lipoprotein catabolic process	The chemical reactions and pathways resulting in the breakdown of any conjugated, water-soluble protein in which the covalently attached nonprotein group consists of a lipid or lipids.	7.143% (1/14)	0.237732	0.62	NA	NA	7.143% (1/14)	0.0124886	1.9	NA	NA	0% (0/14)	0.00331616	2.48	NA	NA	0% (0/14)	0.00252272	2.6	NA	NA	0% (0/14)	0.00313769	2.5	NA	NA
25	9.6	GO:0033235	positive regulation of protein sumoylation	Any process that activates or increases the frequency, rate or extent of the addition of SUMO groups to a protein.	23.077% (3/13)	0.0573013	1.24	NA	NA	7.692% (1/13)	0.0180393	1.74	NA	NA	0% (0/13)	0.0046521	2.33	NA	NA	7.692% (1/13)	0.0104912	1.98	NA	NA	7.692% (1/13)	0.0122306	1.91	NA	NA
25	7.27	GO:0031398	positive regulation of protein ubiquitination	Any process that activates or increases the frequency, rate or extent of the addition of ubiquitin groups to a protein.	15.455% (17/110)	0.0777087	1.11	NA	NA	0.909% (1/110)	0.0096058	2.02	ENSG00000154188	ANGPT1	0% (0/110)	0.0149304	1.83	NA	NA	3.636% (4/110)	0.0189279	1.72	NA	NA	2.727% (3/110)	0.0240218	1.62	NA	NA
25	7.09	GO:1903322	positive regulation of protein modification by small protein conjugation or removal	NA	17.293% (23/133)	0.0769049	1.11	NA	NA	1.504% (2/133)	0.00471627	2.33	ENSG00000068024;ENSG00000154188	HDAC4;ANGPT1	0% (0/133)	0.0142104	1.85	NA	NA	3.759% (5/133)	0.00514477	2.29	ENSG00000100387;ENSG00000140525;ENSG00000147889;ENSG00000175063;ENSG00000180543	RBX1;FANCI;CDKN2A;UBE2C;TSPYL5	3.008% (4/133)	0.00696172	2.16	ENSG00000081377;ENSG00000134242;ENSG00000139174;ENSG00000147889	CDC14B;PTPN22;PRICKLE1;CDKN2A
25	6.56	GO:0031396	regulation of protein ubiquitination	Any process that modulates the frequency, rate or extent of the addition of ubiquitin groups to a protein.	20.202% (40/198)	0.206504	0.69	NA	NA	2.02% (4/198)	0.147096	0.83	NA	NA	0% (0/198)	0.00130538	2.88	NA	NA	4.04% (8/198)	0.0113841	1.94	NA	NA	2.525% (5/198)	0.0101602	1.99	NA	NA
25	4.56	GO:0031399	regulation of protein modification process	Any process that modulates the frequency, rate or extent of the covalent alteration of one or more amino acid residues within a protein.	18.616% (226/1214)	0.0825019	1.08	NA	NA	4.366% (53/1214)	0.00798936	2.1	ENSG00000009694;ENSG00000012223;ENSG00000026508;ENSG00000055208;ENSG00000068024;ENSG00000078747;ENSG00000087589;ENSG00000099250;ENSG00000108861;ENSG00000108950;ENSG00000108984;ENSG00000111912;ENSG00000111961;ENSG00000113448;ENSG00000113520;ENSG00000115170;ENSG00000116717;ENSG00000120156;ENSG00000121236;ENSG00000121594;ENSG00000121989;ENSG00000123080;ENSG00000124205;ENSG00000129757;ENSG00000130340…	TENM1;LTF;CD44;TAB2;HDAC4;ITCH;CASS4;NRP1;DUSP3;FAM20A;MAP2K6;NCOA7;SASH1;PDE4D;IL4;ACVR1;GADD45A;TEK;TRIM6;CD80;ACVR2A;CDKN2C;EDN3;CDKN1C;SNX9;PPARG;CHI3L1;BEX1;APLNR;CD36;TXN;PARP9;HERC5;MFHAS1;CDKN2B;FCGR1A;ADRA2A;PID1;ANGPT1;SAMSN1;TTN;BAG4;NRG1;LRP8;S100A12;CAMP;ADAM9;MINAR1;FAXDC2;SOCS3;HLA-DRB1;ITGA1;ERCC6	0.247% (3/1214)	0.0531016	1.27	NA	NA	3.542% (43/1214)	0.109179	0.96	NA	NA	1.318% (16/1214)	0.158515	0.8	NA	NA
25	6.34	GO:1903320	regulation of protein modification by small protein conjugation or removal	NA	21.162% (51/241)	0.222494	0.65	NA	NA	2.49% (6/241)	0.184614	0.73	NA	NA	0% (0/241)	0.0466071	1.33	NA	NA	3.32% (8/241)	0.00798404	2.1	ENSG00000001084;ENSG00000100387;ENSG00000133169;ENSG00000140525;ENSG00000147889;ENSG00000175063;ENSG00000180543;ENSG00000181788	GCLC;RBX1;BEX1;FANCI;CDKN2A;UBE2C;TSPYL5;SIAH2	2.075% (5/241)	0.00983428	2.01	ENSG00000081377;ENSG00000133169;ENSG00000134242;ENSG00000139174;ENSG00000147889	CDC14B;BEX1;PTPN22;PRICKLE1;CDKN2A
25	7.52	GO:0031397	negative regulation of protein ubiquitination	Any process that stops, prevents, or reduces the frequency, rate or extent of the addition of ubiquitin groups to a protein.	19.737% (15/76)	0.190046	0.72	NA	NA	2.632% (2/76)	0.00922346	2.04	ENSG00000133169;ENSG00000169330	BEX1;MINAR1	0% (0/76)	0.0132224	1.88	NA	NA	3.947% (3/76)	0.0440537	1.36	NA	NA	2.632% (2/76)	0.0404983	1.39	NA	NA
25	5.83	GO:0031400	negative regulation of protein modification process	Any process that stops, prevents, or reduces the frequency, rate or extent of the covalent alteration of one or more amino acid residues within a protein.	17.75% (71/400)	0.259319	0.59	NA	NA	3.25% (13/400)	0.27999	0.55	NA	NA	0% (0/400)	0.00555369	2.26	NA	NA	2.75% (11/400)	0.0215108	1.67	NA	NA	1% (4/400)	0.0083171	2.08	ENSG00000129757;ENSG00000133169;ENSG00000134242;ENSG00000147889	CDKN1C;BEX1;PTPN22;CDKN2A
25	6.44	GO:0045860	positive regulation of protein kinase activity	Any process that activates or increases the frequency, rate or extent of protein kinase activity.	19.084% (50/262)	0.0772423	1.11	NA	NA	6.489% (17/262)	0.0263585	1.58	NA	NA	0% (0/262)	0.00243768	2.61	NA	NA	3.817% (10/262)	0.0101369	1.99	NA	NA	0.763% (2/262)	0.0029841	2.53	ENSG00000012223;ENSG00000172232	LTF;AZU1
25	5.36	GO:0001934	positive regulation of protein phosphorylation	Any process that activates or increases the frequency, rate or extent of addition of phosphate groups to amino acids within a protein.	17.966% (106/590)	0.00180249	2.74	ENSG00000009694;ENSG00000012223;ENSG00000019582;ENSG00000026103;ENSG00000026508;ENSG00000037280;ENSG00000043462;ENSG00000055208;ENSG00000058668;ENSG00000072274;ENSG00000073712;ENSG00000076604;ENSG00000078140;ENSG00000080824;ENSG00000087589;ENSG00000088325;ENSG00000089041;ENSG00000096968;ENSG00000099985;ENSG00000101126;ENSG00000102760;ENSG00000104320;ENSG00000106462;ENSG00000108950;ENSG00000108984…	TENM1;LTF;CD74;FAS;CD44;FLT4;LCP2;TAB2;ATP2B4;TFRC;FERMT2;TRAF4;UBE2K;HSP90AA1;CASS4;TPX2;P2RX7;JAK2;OSM;ADNP;RGCC;NBN;EZH2;FAM20A;MAP2K6;FBXW7;OSBP;IFNG;SASH1;CCND3;HBEGF;IL4;PDCD10;ECT2;MOB1A;ACVR1;RAP1A;LEPR;MAPKAP1;PGF;TEK;MOB3B;TNFSF11;TRIM6;CD80;ACVR2A;FLT3;INHBA;RAP2C;RAP2A;IL1B;C3;CCR7;FXR2;SNX9;LATS1;CHI3L1;KRAS;CAMK1;ROCK2;CD36;EDNRB;TXN;ENPP2;ARRB1;BCAR3;PARP9;SEMA7A;AKT1;PDGFC;TAOK2;F…	5.763% (34/590)	7.81e-05	4.11	ENSG00000009694;ENSG00000012223;ENSG00000026508;ENSG00000055208;ENSG00000087589;ENSG00000099250;ENSG00000108950;ENSG00000108984;ENSG00000111961;ENSG00000113520;ENSG00000115170;ENSG00000120156;ENSG00000121236;ENSG00000121594;ENSG00000121989;ENSG00000124205;ENSG00000130340;ENSG00000133048;ENSG00000134817;ENSG00000135218;ENSG00000136810;ENSG00000138496;ENSG00000150337;ENSG00000150594;ENSG00000154188…	TENM1;LTF;CD44;TAB2;CASS4;NRP1;FAM20A;MAP2K6;SASH1;IL4;ACVR1;TEK;TRIM6;CD80;ACVR2A;EDN3;SNX9;CHI3L1;APLNR;CD36;TXN;PARP9;FCGR1A;ADRA2A;ANGPT1;BAG4;NRG1;LRP8;S100A12;CAMP;ADAM9;FAXDC2;HLA-DRB1;ERCC6	0.508% (3/590)	0.000475584	3.32	ENSG00000026103;ENSG00000120162;ENSG00000153064	FAS;MOB3B;BANK1	4.068% (24/590)	0.00013309	3.88	ENSG00000012223;ENSG00000055208;ENSG00000072274;ENSG00000088325;ENSG00000089041;ENSG00000106462;ENSG00000108950;ENSG00000108984;ENSG00000116678;ENSG00000119630;ENSG00000122641;ENSG00000125249;ENSG00000126775;ENSG00000135218;ENSG00000136810;ENSG00000138496;ENSG00000138685;ENSG00000150337;ENSG00000157168;ENSG00000157404;ENSG00000163221;ENSG00000164047;ENSG00000168615;ENSG00000225830	LTF;TAB2;TFRC;TPX2;P2RX7;EZH2;FAM20A;MAP2K6;LEPR;PGF;INHBA;RAP2A;ATG14;CD36;TXN;PARP9;FGF2;FCGR1A;NRG1;KIT;S100A12;CAMP;ADAM9;ERCC6	1.525% (9/590)	0.00140613	2.85	ENSG00000012223;ENSG00000114315;ENSG00000120162;ENSG00000122641;ENSG00000125249;ENSG00000153064;ENSG00000164047;ENSG00000172232;ENSG00000184349	LTF;HES1;MOB3B;INHBA;RAP2A;BANK1;CAMP;AZU1;EFNA5
25	7.49	GO:0033138	positive regulation of peptidyl-serine phosphorylation	Any process that activates or increases the frequency, rate or extent of the phosphorylation of peptidyl-serine.	18.947% (18/95)	0.0934146	1.03	NA	NA	7.368% (7/95)	0.0252328	1.6	NA	NA	0% (0/95)	0.00539486	2.27	NA	NA	3.158% (3/95)	0.0095233	2.02	ENSG00000072274;ENSG00000136810;ENSG00000225830	TFRC;TXN;ERCC6	0% (0/95)	0.00466435	2.33	NA	NA
25	5.89	GO:0045859	regulation of protein kinase activity	Any process that modulates the frequency, rate or extent of protein kinase activity.	18.993% (83/437)	0.0139404	1.86	NA	NA	5.721% (25/437)	0.00356186	2.45	ENSG00000009694;ENSG00000012223;ENSG00000055208;ENSG00000087589;ENSG00000108861;ENSG00000111961;ENSG00000113520;ENSG00000116717;ENSG00000123080;ENSG00000124205;ENSG00000129757;ENSG00000130340;ENSG00000132170;ENSG00000133048;ENSG00000136810;ENSG00000138646;ENSG00000147883;ENSG00000150337;ENSG00000150594;ENSG00000154188;ENSG00000155657;ENSG00000157168;ENSG00000157193;ENSG00000163221;ENSG00000168615	TENM1;LTF;TAB2;CASS4;DUSP3;SASH1;IL4;GADD45A;CDKN2C;EDN3;CDKN1C;SNX9;PPARG;CHI3L1;TXN;HERC5;CDKN2B;FCGR1A;ADRA2A;ANGPT1;TTN;NRG1;LRP8;S100A12;ADAM9	0% (0/437)	0.249848	0.6	NA	NA	3.661% (16/437)	0.000646884	3.19	ENSG00000012223;ENSG00000055208;ENSG00000088325;ENSG00000094804;ENSG00000106462;ENSG00000108861;ENSG00000116717;ENSG00000136810;ENSG00000138685;ENSG00000147883;ENSG00000147889;ENSG00000150337;ENSG00000157168;ENSG00000163221;ENSG00000168615;ENSG00000186834	LTF;TAB2;TPX2;CDC6;EZH2;DUSP3;GADD45A;TXN;FGF2;CDKN2B;CDKN2A;FCGR1A;NRG1;S100A12;ADAM9;HEXIM1	1.144% (5/437)	0.336679	0.47	NA	NA
25	6.57	GO:0071900	regulation of protein serine/threonine kinase activity	Any process that modulates the rate, frequency, or extent of protein serine/threonine kinase activity.	17.131% (43/251)	0.0393976	1.4	NA	NA	4.781% (12/251)	0.0248653	1.6	NA	NA	0% (0/251)	0.00295502	2.53	NA	NA	3.984% (10/251)	0.0133172	1.88	NA	NA	1.195% (3/251)	0.00806835	2.09	ENSG00000012223;ENSG00000134242;ENSG00000147889	LTF;PTPN22;CDKN2A
25	6.29	GO:0001933	negative regulation of protein phosphorylation	Any process that stops, prevents or reduces the rate of addition of phosphate groups to amino acids within a protein.	15.185% (41/270)	0.00338237	2.47	ENSG00000007372;ENSG00000067606;ENSG00000090376;ENSG00000100678;ENSG00000100744;ENSG00000101126;ENSG00000101391;ENSG00000102580;ENSG00000103423;ENSG00000105568;ENSG00000108465;ENSG00000108861;ENSG00000110422;ENSG00000111537;ENSG00000116285;ENSG00000116717;ENSG00000125538;ENSG00000129757;ENSG00000131023;ENSG00000132170;ENSG00000139687;ENSG00000140105;ENSG00000142208;ENSG00000147889;ENSG00000147894…	PAX6;PRKCZ;IRAK3;SLC8A3;GSKIP;ADNP;CDK5RAP1;DNAJC3;DNAJA3;PPP2R1A;CDK5RAP3;DUSP3;HIPK3;IFNG;ERRFI1;GADD45A;IL1B;CDKN1C;LATS1;PPARG;RB1;WARS1;AKT1;CDKN2A;C9orf72;GPD1L;HHEX;ANGPT1;SAMSN1;PTPN13;TERF2IP;HEXIM2;QARS1;SMCR8;SLC8A1;SOCS3;AIDA;PTPRT;NF1;INPP5F;DMD	3.333% (9/270)	0.00284588	2.55	ENSG00000108861;ENSG00000113448;ENSG00000116717;ENSG00000129757;ENSG00000132170;ENSG00000153823;ENSG00000154188;ENSG00000155307;ENSG00000184557	DUSP3;PDE4D;GADD45A;CDKN1C;PPARG;PID1;ANGPT1;SAMSN1;SOCS3	0% (0/270)	0.000659614	3.18	NA	NA	2.593% (7/270)	0.00144797	2.84	ENSG00000108861;ENSG00000116717;ENSG00000126775;ENSG00000147889;ENSG00000155307;ENSG00000166848;ENSG00000186834	DUSP3;GADD45A;ATG14;CDKN2A;SAMSN1;TERF2IP;HEXIM1	1.111% (3/270)	0.00187012	2.73	ENSG00000129757;ENSG00000134242;ENSG00000147889	CDKN1C;PTPN22;CDKN2A
25	8.26	GO:0010799	regulation of peptidyl-threonine phosphorylation	Any process that modulates the frequency, rate or extent of peptidyl-threonine phosphorylation. Peptidyl-threonine phosphorylation is the phosphorylation of peptidyl-threonine to form peptidyl-O-phospho-L-threonine.	9.302% (4/43)	0.00971993	2.01	ENSG00000078140;ENSG00000121236;ENSG00000133048;ENSG00000165730	UBE2K;TRIM6;CHI3L1;STOX1	4.651% (2/43)	0.0634449	1.2	NA	NA	0% (0/43)	0.0240779	1.62	NA	NA	0% (0/43)	0.0153861	1.81	NA	NA	2.326% (1/43)	0.0219438	1.66	NA	NA
25	6.42	GO:0050730	regulation of peptidyl-tyrosine phosphorylation	Any process that modulates the frequency, rate or extent of the phosphorylation of peptidyl-tyrosine.	18.1% (40/221)	0.082287	1.08	NA	NA	6.335% (14/221)	0.0228	1.64	NA	NA	0.452% (1/221)	0.00589623	2.23	ENSG00000153064	BANK1	2.715% (6/221)	0.00351797	2.45	ENSG00000135218;ENSG00000138496;ENSG00000150337;ENSG00000155307;ENSG00000157168;ENSG00000157404	CD36;PARP9;FCGR1A;SAMSN1;NRG1;KIT	1.81% (4/221)	0.00821546	2.09	ENSG00000114315;ENSG00000134242;ENSG00000153064;ENSG00000184349	HES1;PTPN22;BANK1;EFNA5
26	9.67	GO:0097202	activation of cysteine-type endopeptidase activity	Any process that initiates the activity of the inactive enzyme cysteine-type endopeptidase.	23.077% (3/13)	0.00635682	2.2	ENSG00000091106;ENSG00000163565;ENSG00000198363	NLRC4;IFI16;ASPH	15.385% (2/13)	0.00219148	2.66	ENSG00000163565;ENSG00000198363	IFI16;ASPH	0% (0/13)	0.00258229	2.59	NA	NA	15.385% (2/13)	0.00228292	2.64	ENSG00000163565;ENSG00000198363	IFI16;ASPH	0% (0/13)	0.00251828	2.6	NA	NA
26	4.08	GO:0006508	proteolysis	The hydrolysis of proteins into smaller polypeptides and/or amino acids by cleavage of their peptide bonds.	18.734% (287/1532)	0.00308574	2.51	ENSG00000001084;ENSG00000004897;ENSG00000007944;ENSG00000010438;ENSG00000011198;ENSG00000011275;ENSG00000012223;ENSG00000013275;ENSG00000013561;ENSG00000019995;ENSG00000021355;ENSG00000025434;ENSG00000026103;ENSG00000026508;ENSG00000034677;ENSG00000034713;ENSG00000042980;ENSG00000049759;ENSG00000051108;ENSG00000056586;ENSG00000057757;ENSG00000063978;ENSG00000067900;ENSG00000068878;ENSG00000069869…	GCLC;CDC27;MYLIP;PRSS3;ABHD5;RNF216;LTF;PSMC4;RNF14;ZRANB1;SERPINB1;NR1H3;FAS;CD44;RNF19A;GABARAPL2;ADAM28;NEDD4L;HERPUD1;RC3H2;PITHD1;RNF4;ROCK1;PSME4;NEDD4;UFD1;UBE2D1;TRHDE;FBXW11;ADAM11;PICALM;TRAF4;USP33;NAALAD2;UBE2A;CST7;FAP;UBE2K;NRDC;ITCH;TP53INP2;PCNP;GSK3B;CHMP5;P2RX7;ANAPC5;MUL1;NLRC4;CDC23;WAC;JAK2;KLHL22;MMP11;GGT5;RBX1;DESI1;CTSG;GZMB;TRIM9;PSMC6;PSMA3;PSMA6;TRPC4AP;USP14;MIB1;PHEX…	3.982% (61/1532)	0.000364402	3.44	ENSG00000012223;ENSG00000026508;ENSG00000038295;ENSG00000077616;ENSG00000078098;ENSG00000078747;ENSG00000078804;ENSG00000086065;ENSG00000087128;ENSG00000100902;ENSG00000109189;ENSG00000110042;ENSG00000110200;ENSG00000111144;ENSG00000113712;ENSG00000114948;ENSG00000116044;ENSG00000118113;ENSG00000121060;ENSG00000126709;ENSG00000129521;ENSG00000130340;ENSG00000132170;ENSG00000132906;ENSG00000134028…	LTF;CD44;TLL1;NAALAD2;FAP;ITCH;TP53INP2;CHMP5;TMPRSS11E;PSMA6;USP46;DTX4;ANAPC15;LTA4H;CSNK1A1;ADAM23;NFE2L2;MMP8;TRIM25;IFI6;EGLN3;SNX9;PPARG;CASP9;ADAMDEC1;LAMTOR5;FBXL8;SERPINE2;SCRN1;CASP1;HERC6;HERC5;NOL3;S100A8;PRSS35;RNF217;ADRA2A;AMN1;LRP8;CAPN2;DISC1;CAPN13;S100A9;IFI16;IFI27;HTRA1;ADAM9;HINT1;SH3RF3;OLR1;NRIP3;FBXO39;USP18;MATCAP1;S100A10;ASPH;UBE2J1;CARD16;FBXO48;NAIP;HP	0.131% (2/1532)	0.00262003	2.58	ENSG00000026103;ENSG00000174080	FAS;CTSF	2.937% (45/1532)	5.84e-05	4.23	ENSG00000001084;ENSG00000004897;ENSG00000012223;ENSG00000013561;ENSG00000034713;ENSG00000048140;ENSG00000049759;ENSG00000056586;ENSG00000072657;ENSG00000089041;ENSG00000099910;ENSG00000100387;ENSG00000100448;ENSG00000111144;ENSG00000118113;ENSG00000136634;ENSG00000137752;ENSG00000140939;ENSG00000141034;ENSG00000143546;ENSG00000146250;ENSG00000146373;ENSG00000147889;ENSG00000154734;ENSG00000154914…	GCLC;CDC27;LTF;RNF14;GABARAPL2;TSPAN17;NEDD4L;RC3H2;TRHDE;P2RX7;KLHL22;RBX1;CTSG;LTA4H;MMP8;IL10;CASP1;NOL3;GID4;S100A8;PRSS35;RNF217;CDKN2A;ADAMTS1;USP43;ANKRD9;AMFR;WDR26;CAPN13;IFI16;AIM2;IFI27;ADAM9;ARL6IP1;HTRA3;OLR1;UBE2C;NRIP3;SIAH2;UBE2H;MMP1;ASPH;NAIP;HP;MMP28	0.718% (11/1532)	0.0044981	2.35	ENSG00000000971;ENSG00000012223;ENSG00000100448;ENSG00000112812;ENSG00000118113;ENSG00000139174;ENSG00000147889;ENSG00000170801;ENSG00000172071;ENSG00000172232;ENSG00000173391	CFH;LTF;CTSG;PRSS16;MMP8;PRICKLE1;CDKN2A;HTRA3;EIF2AK3;AZU1;OLR1
26	5.26	GO:0051604	protein maturation	Any process leading to the attainment of the full functional capacity of a protein.	17.669% (94/532)	0.00141882	2.85	ENSG00000010438;ENSG00000015676;ENSG00000019582;ENSG00000070269;ENSG00000080824;ENSG00000088356;ENSG00000089041;ENSG00000090273;ENSG00000091106;ENSG00000100380;ENSG00000100448;ENSG00000100453;ENSG00000100591;ENSG00000102174;ENSG00000102580;ENSG00000102910;ENSG00000103423;ENSG00000105483;ENSG00000106327;ENSG00000106624;ENSG00000107959;ENSG00000109917;ENSG00000110958;ENSG00000113013;ENSG00000114166…	PRSS3;NUDCD3;CD74;TMEM260;HSP90AA1;PDRG1;P2RX7;NUDC;NLRC4;ST13;CTSG;GZMB;AHSA1;PHEX;DNAJC3;LONP2;DNAJA3;CARD8;TFR2;AEBP1;PITRM1;ZPR1;PTGES3;HSPA9;KAT2B;LMAN2L;DHCR24;APH1A;ATF6;FKBP9;PLAU;SRGN;PRDX4;ATP7B;PFDN5;TRAP1;CANX;DNAJB1;CASP9;ISCA1;CCT7;SERPINE2;DNAJB5;PRCP;CASP1;ADAM10;IFT172;NOL3;AFG3L2;PARP1;CIAO1;CORIN;PLA2G7;ZNG1E;SERPINH1;ADAM17;CAST;DISP1;MMS19;PDIA4;VBP1;BAG4;TSPAN33;DFFA;CAPN2;C…	2.632% (14/532)	0.00042754	3.37	ENSG00000038295;ENSG00000070269;ENSG00000132906;ENSG00000135919;ENSG00000137752;ENSG00000140939;ENSG00000156735;ENSG00000162909;ENSG00000163565;ENSG00000166797;ENSG00000168615;ENSG00000197747;ENSG00000198363;ENSG00000204397	TLL1;TMEM260;CASP9;SERPINE2;CASP1;NOL3;BAG4;CAPN2;IFI16;CIAO2A;ADAM9;S100A10;ASPH;CARD16	0% (0/532)	0.012359	1.91	NA	NA	2.256% (12/532)	0.000359857	3.44	ENSG00000089041;ENSG00000100448;ENSG00000114166;ENSG00000137094;ENSG00000137752;ENSG00000140939;ENSG00000163565;ENSG00000164070;ENSG00000168615;ENSG00000169877;ENSG00000182512;ENSG00000198363	P2RX7;CTSG;KAT2B;DNAJB5;CASP1;NOL3;IFI16;HSPA4L;ADAM9;AHSP;GLRX5;ASPH	0.376% (2/532)	0.0105434	1.98	NA	NA
26	7.9	GO:0031638	zymogen activation	The proteolytic processing of an inactive enzyme to an active form.	15.789% (9/57)	0.00203927	2.69	ENSG00000010438;ENSG00000091106;ENSG00000116133;ENSG00000122861;ENSG00000135919;ENSG00000163565;ENSG00000167711;ENSG00000197747;ENSG00000198363	PRSS3;NLRC4;DHCR24;PLAU;SERPINE2;IFI16;SERPINF2;S100A10;ASPH	7.018% (4/57)	0.00216548	2.66	ENSG00000135919;ENSG00000163565;ENSG00000197747;ENSG00000198363	SERPINE2;IFI16;S100A10;ASPH	0% (0/57)	0.00199175	2.7	NA	NA	3.509% (2/57)	0.000975014	3.01	ENSG00000163565;ENSG00000198363	IFI16;ASPH	0% (0/57)	0.0017228	2.76	NA	NA
26	6.19	GO:0016485	protein processing	Any protein maturation process achieved by the cleavage of a peptide bond or bonds within a protein. Protein maturation is the process leading to the attainment of the full functional capacity of a protein.	18.182% (44/242)	0.0800006	1.1	NA	NA	4.545% (11/242)	0.0144866	1.84	NA	NA	0% (0/242)	0.0052101	2.28	NA	NA	2.893% (7/242)	0.0152815	1.82	NA	NA	0.413% (1/242)	0.00647051	2.19	ENSG00000100448	CTSG
26	5.67	GO:0006417	regulation of translation	Any process that modulates the frequency, rate or extent of the chemical reactions and pathways resulting in the formation of proteins by the translation of mRNA or circRNA.	19.137% (71/371)	0.00602594	2.22	ENSG00000005007;ENSG00000009307;ENSG00000055332;ENSG00000063046;ENSG00000066044;ENSG00000066926;ENSG00000067248;ENSG00000070061;ENSG00000075151;ENSG00000079277;ENSG00000082516;ENSG00000086232;ENSG00000091436;ENSG00000099622;ENSG00000100227;ENSG00000100453;ENSG00000100601;ENSG00000101391;ENSG00000102580;ENSG00000103319;ENSG00000106682;ENSG00000107864;ENSG00000107954;ENSG00000108443;ENSG00000110321…	UPF1;CSDE1;EIF2AK2;EIF4B;ELAVL1;FECH;DHX29;ELP1;EIF4G3;MKNK1;GEMIN5;EIF2AK1;MAP3K20;CIRBP;POLDIP3;GZMB;ALKBH1;CDK5RAP1;DNAJC3;EEF2K;EIF4H;CPEB3;NEURL1;RPS6KB1;EIF4G2;MRPS27;CNOT6;CPEB4;XRN1;EIF1B;NCL;FOXO3;PAIP2B;MIF4GD;TRAP1;FXR2;RIDA;PIWIL4;NAT10;CYP1B1;LARP1B;EIF4A3;AKT1;EIF2B5;LSM14B;YTHDF1;UHMK1;PELO;TENT5B;RPL26;EIF4E3;EIF5A2;LARP6;NOLC1;TRUB2;DAPK3;POLR2G;PTAFR;PA2G4;EIF1;RBM4B;SHMT1;SHMT2…	2.695% (10/371)	0.000262515	3.58	ENSG00000055332;ENSG00000091436;ENSG00000107954;ENSG00000132541;ENSG00000138061;ENSG00000141543;ENSG00000163412;ENSG00000173914;ENSG00000185650;ENSG00000253250	EIF2AK2;MAP3K20;NEURL1;RIDA;CYP1B1;EIF4A3;EIF4E3;RBM4B;ZFP36L1;C8orf88	0.539% (2/371)	9.16e-05	4.04	ENSG00000020577;ENSG00000153064	SAMD4A;BANK1	2.156% (8/371)	7.82e-05	4.11	ENSG00000009307;ENSG00000091436;ENSG00000099622;ENSG00000134627;ENSG00000152332;ENSG00000170515;ENSG00000173914;ENSG00000253250	CSDE1;MAP3K20;CIRBP;PIWIL4;UHMK1;PA2G4;RBM4B;C8orf88	0.809% (3/371)	6.27e-05	4.2	ENSG00000153064;ENSG00000172071;ENSG00000229474	BANK1;EIF2AK3;PATL2
26	7.32	GO:0006446	regulation of translational initiation	Any process that modulates the frequency, rate or extent of translational initiation.	27.5% (22/80)	0.632718	0.2	NA	NA	1.25% (1/80)	0.00293734	2.53	ENSG00000253250	C8orf88	1.25% (1/80)	0.0156385	1.81	NA	NA	3.75% (3/80)	0.0159793	1.8	NA	NA	2.5% (2/80)	0.0136759	1.86	NA	NA
26	9.09	GO:0035278	miRNA-mediated gene silencing by inhibition of translation	An RNA interference pathway in which microRNAs (miRNAs) block the translation of target mRNAs into proteins. Once incorporated into a RNA-induced silencing complex (RISC), a miRNA will typically mediate repression of translation if the miRNA imperfectly base-pairs with the 3' untranslated regions of target mRNAs.	0% (0/18)	0.00247568	2.61	NA	NA	0% (0/18)	0.0138928	1.86	NA	NA	0% (0/18)	0.019836	1.7	NA	NA	0% (0/18)	0.0157281	1.8	NA	NA	0% (0/18)	0.0188555	1.72	NA	NA
26	6.92	GO:0017148	negative regulation of translation	Any process that stops, prevents, or reduces the frequency, rate or extent of the chemical reactions and pathways resulting in the formation of proteins by the translation of mRNA or circRNA.	15.873% (20/126)	0.0544678	1.26	NA	NA	3.968% (5/126)	0.00576406	2.24	ENSG00000055332;ENSG00000091436;ENSG00000132541;ENSG00000141543;ENSG00000253250	EIF2AK2;MAP3K20;RIDA;EIF4A3;C8orf88	1.587% (2/126)	0.00638068	2.2	ENSG00000020577;ENSG00000153064	SAMD4A;BANK1	2.381% (3/126)	0.0025876	2.59	ENSG00000091436;ENSG00000099622;ENSG00000253250	MAP3K20;CIRBP;C8orf88	2.381% (3/126)	0.00292244	2.53	ENSG00000153064;ENSG00000172071;ENSG00000229474	BANK1;EIF2AK3;PATL2
26	8.81	GO:1902992	negative regulation of amyloid precursor protein catabolic process	NA	30% (6/20)	0.517567	0.29	NA	NA	0% (0/20)	0.0069564	2.16	NA	NA	0% (0/20)	0.0101475	1.99	NA	NA	0% (0/20)	0.0079725	2.1	NA	NA	0% (0/20)	0.00962138	2.02	NA	NA
26	5.11	GO:0051248	negative regulation of protein metabolic process	Any process that stops, prevents, or reduces the frequency, rate or extent of chemical reactions and pathways involving a protein.	18.717% (143/764)	0.0121005	1.92	NA	NA	3.796% (29/764)	0.00869989	2.06	ENSG00000012223;ENSG00000026508;ENSG00000055332;ENSG00000091436;ENSG00000108861;ENSG00000111912;ENSG00000113448;ENSG00000116717;ENSG00000126709;ENSG00000128268;ENSG00000129757;ENSG00000130164;ENSG00000132170;ENSG00000132541;ENSG00000133169;ENSG00000134248;ENSG00000135919;ENSG00000140939;ENSG00000141543;ENSG00000147324;ENSG00000153823;ENSG00000154188;ENSG00000155307;ENSG00000163565;ENSG00000169330…	LTF;CD44;EIF2AK2;MAP3K20;DUSP3;NCOA7;PDE4D;GADD45A;IFI6;MGAT3;CDKN1C;LDLR;PPARG;RIDA;BEX1;LAMTOR5;SERPINE2;NOL3;EIF4A3;MFHAS1;PID1;ANGPT1;SAMSN1;IFI16;MINAR1;SOCS3;CARD16;NAIP;C8orf88	0.262% (2/764)	0.0035868	2.45	ENSG00000020577;ENSG00000153064	SAMD4A;BANK1	3.01% (23/764)	0.0024047	2.62	ENSG00000001084;ENSG00000012223;ENSG00000034713;ENSG00000091436;ENSG00000099622;ENSG00000108861;ENSG00000111912;ENSG00000112335;ENSG00000116717;ENSG00000126775;ENSG00000133169;ENSG00000136634;ENSG00000140939;ENSG00000147324;ENSG00000147889;ENSG00000155307;ENSG00000163565;ENSG00000166848;ENSG00000170540;ENSG00000181788;ENSG00000186834;ENSG00000249437;ENSG00000253250	GCLC;LTF;GABARAPL2;MAP3K20;CIRBP;DUSP3;NCOA7;SNX3;GADD45A;ATG14;BEX1;IL10;NOL3;MFHAS1;CDKN2A;SAMSN1;IFI16;TERF2IP;ARL6IP1;SIAH2;HEXIM1;NAIP;C8orf88	1.047% (8/764)	0.00130348	2.88	ENSG00000012223;ENSG00000129757;ENSG00000133169;ENSG00000134242;ENSG00000147889;ENSG00000153064;ENSG00000172071;ENSG00000229474	LTF;CDKN1C;BEX1;PTPN22;CDKN2A;BANK1;EIF2AK3;PATL2
26	8.94	GO:1905906	regulation of amyloid fibril formation	NA	18.75% (3/16)	0.0313304	1.5	NA	NA	6.25% (1/16)	0.0307695	1.51	NA	NA	0% (0/16)	0.0102287	1.99	NA	NA	0% (0/16)	0.00817932	2.09	NA	NA	0% (0/16)	0.00974032	2.01	NA	NA
26	4.56	GO:0051247	positive regulation of protein metabolic process	Any process that activates or increases the frequency, rate or extent of the chemical reactions and pathways involving a protein.	18.659% (231/1238)	0.154422	0.81	NA	NA	4.523% (56/1238)	0.0179463	1.75	NA	NA	0.323% (4/1238)	0.00200728	2.7	ENSG00000020577;ENSG00000026103;ENSG00000120162;ENSG00000153064	SAMD4A;FAS;MOB3B;BANK1	3.554% (44/1238)	0.015533	1.81	NA	NA	1.131% (14/1238)	0.0105056	1.98	NA	NA
26	5.46	GO:0030162	regulation of proteolysis	Any process that modulates the frequency, rate or extent of the hydrolysis of a peptide bond or bonds within a protein.	20.144% (112/556)	0.0278713	1.55	NA	NA	4.496% (25/556)	0.0193257	1.71	NA	NA	0.18% (1/556)	0.00945319	2.02	ENSG00000026103	FAS	3.417% (19/556)	0.00943703	2.03	ENSG00000001084;ENSG00000012223;ENSG00000013561;ENSG00000034713;ENSG00000048140;ENSG00000100387;ENSG00000136634;ENSG00000137752;ENSG00000140939;ENSG00000143546;ENSG00000146373;ENSG00000147889;ENSG00000163565;ENSG00000163568;ENSG00000168615;ENSG00000170540;ENSG00000181788;ENSG00000198363;ENSG00000249437	GCLC;LTF;RNF14;GABARAPL2;TSPAN17;RBX1;IL10;CASP1;NOL3;S100A8;RNF217;CDKN2A;IFI16;AIM2;ADAM9;ARL6IP1;SIAH2;ASPH;NAIP	0.719% (4/556)	0.00429928	2.37	ENSG00000012223;ENSG00000139174;ENSG00000147889;ENSG00000172071	LTF;PRICKLE1;CDKN2A;EIF2AK3
26	3.89	GO:0051246	regulation of protein metabolic process	Any process that modulates the frequency, rate or extent of the chemical reactions and pathways involving a protein.	19.558% (407/2081)	0.0117446	1.93	NA	NA	4.133% (86/2081)	0.0126775	1.9	NA	NA	0.192% (4/2081)	0.00148363	2.83	ENSG00000020577;ENSG00000026103;ENSG00000120162;ENSG00000153064	SAMD4A;FAS;MOB3B;BANK1	3.364% (70/2081)	0.169504	0.77	NA	NA	0.817% (17/2081)	0.0895962	1.05	NA	NA
26	8.7	GO:0032515	negative regulation of phosphoprotein phosphatase activity	Any process that stops or reduces the activity of a phosphoprotein phosphatase.	33.333% (7/21)	0.389887	0.41	NA	NA	0% (0/21)	0.00215526	2.67	NA	NA	0% (0/21)	0.00358383	2.45	NA	NA	0% (0/21)	0.00253554	2.6	NA	NA	0% (0/21)	0.00333307	2.48	NA	NA
26	10.23	GO:1905049	negative regulation of metallopeptidase activity	NA	16.667% (1/6)	0.0127622	1.89	NA	NA	0% (0/6)	0.00176085	2.75	NA	NA	0% (0/6)	0.00205454	2.69	NA	NA	0% (0/6)	0.00184336	2.73	NA	NA	0% (0/6)	0.00201138	2.7	NA	NA
26	6.58	GO:0045861	negative regulation of proteolysis	Any process that stops, prevents, or reduces the frequency, rate or extent of the hydrolysis of a peptide bond or bonds within a protein.	19.689% (38/193)	0.0811731	1.09	NA	NA	4.663% (9/193)	0.0361621	1.44	NA	NA	0% (0/193)	0.00949658	2.02	NA	NA	4.663% (9/193)	0.0346119	1.46	NA	NA	1.036% (2/193)	0.0191299	1.72	NA	NA
27	6.46	GO:0031330	negative regulation of cellular catabolic process	Any process that stops, prevents, or reduces the frequency, rate or extent of the chemical reactions and pathways resulting in the breakdown of substances, carried out by individual cells.	19.91% (44/221)	0.0216863	1.66	NA	NA	2.262% (5/221)	6.94e-05	4.16	ENSG00000055208;ENSG00000068024;ENSG00000112062;ENSG00000172936;ENSG00000257017	TAB2;HDAC4;MAPK14;MYD88;HP	0% (0/221)	0.000111569	3.95	NA	NA	5.43% (12/221)	0.00254796	2.59	ENSG00000009307;ENSG00000055208;ENSG00000099622;ENSG00000099910;ENSG00000101412;ENSG00000112062;ENSG00000116678;ENSG00000136634;ENSG00000149557;ENSG00000157625;ENSG00000178752;ENSG00000257017	CSDE1;TAB2;CIRBP;KLHL22;E2F1;MAPK14;LEPR;IL10;FEZ1;TAB3;ERFE;HP	0.452% (1/221)	0.00014656	3.83	ENSG00000134242	PTPN22
27	5.97	GO:0009895	negative regulation of catabolic process	Any process that stops, prevents, or reduces the frequency, rate or extent of the chemical reactions and pathways resulting in the breakdown of substances.	19.885% (69/347)	0.0149626	1.82	NA	NA	2.594% (9/347)	0.0109452	1.96	NA	NA	0% (0/347)	0.00958408	2.02	NA	NA	4.611% (16/347)	0.0278001	1.56	NA	NA	0.576% (2/347)	0.0131693	1.88	NA	NA
27	8.39	GO:1903146	regulation of autophagy of mitochondrion	NA	14.634% (6/41)	0.00279607	2.55	ENSG00000005022;ENSG00000085733;ENSG00000109670;ENSG00000135093;ENSG00000163251;ENSG00000181852	SLC25A5;CTTN;FBXW7;USP30;FZD5;RNF41	2.439% (1/41)	0.0846409	1.07	NA	NA	0% (0/41)	0.0928103	1.03	NA	NA	2.439% (1/41)	0.0869317	1.06	NA	NA	0% (0/41)	0.0917245	1.04	NA	NA
27	8.64	GO:1901524	regulation of mitophagy	NA	18.182% (6/33)	0.0110766	1.96	NA	NA	3.03% (1/33)	0.0036971	2.43	ENSG00000085733	CTTN	0% (0/33)	0.0013848	2.86	NA	NA	3.03% (1/33)	0.00116107	2.94	ENSG00000163251	FZD5	0% (0/33)	0.00133397	2.87	NA	NA
27	6.8	GO:0010508	positive regulation of autophagy	Any process that activates, maintains or increases the rate of autophagy. Autophagy is the process in which cells digest parts of their own cytoplasm.	18.954% (29/153)	0.0542852	1.27	NA	NA	3.268% (5/153)	0.00218794	2.66	ENSG00000097033;ENSG00000113520;ENSG00000121236;ENSG00000130147;ENSG00000132274	SH3GLB1;IL4;TRIM6;SH3BP4;TRIM22	0% (0/153)	0.000339631	3.47	NA	NA	0% (0/153)	0.000164189	3.78	NA	NA	0% (0/153)	0.000292123	3.53	NA	NA
27	6.77	GO:0016241	regulation of macroautophagy	Any process that modulates the frequency, rate or extent of macroautophagy.	19.075% (33/173)	0.00922025	2.04	ENSG00000005022;ENSG00000011465;ENSG00000069869;ENSG00000085733;ENSG00000095787;ENSG00000097033;ENSG00000100292;ENSG00000100554;ENSG00000106615;ENSG00000109670;ENSG00000110046;ENSG00000113520;ENSG00000114520;ENSG00000122958;ENSG00000123240;ENSG00000135018;ENSG00000135093;ENSG00000136888;ENSG00000142208;ENSG00000147894;ENSG00000149212;ENSG00000149557;ENSG00000155097;ENSG00000163251;ENSG00000165943…	SLC25A5;DCN;NEDD4;CTTN;WAC;SH3GLB1;HMOX1;ATP6V1D;RHEB;FBXW7;ATG2A;IL4;SNX4;VPS26A;OPTN;UBQLN1;USP30;ATP6V1G1;AKT1;C9orf72;SESN3;FEZ1;ATP6V1C1;FZD5;MOAP1;PIP4K2C;SMCR8;RNF41;ATP6V0A2;UBQLN2;PIK3R4;EHMT2;PIP4K2B	1.734% (3/173)	0.00565891	2.25	ENSG00000085733;ENSG00000097033;ENSG00000113520	CTTN;SH3GLB1;IL4	0% (0/173)	0.00670933	2.17	NA	NA	1.734% (3/173)	0.00826091	2.08	ENSG00000126775;ENSG00000149557;ENSG00000163251	ATG14;FEZ1;FZD5	0% (0/173)	0.00556475	2.25	NA	NA
27	5.92	GO:0010506	regulation of autophagy	Any process that modulates the frequency, rate or extent of autophagy. Autophagy is the process in which cells digest parts of their own cytoplasm.	19.832% (71/358)	0.165801	0.78	NA	NA	2.235% (8/358)	0.00237788	2.62	ENSG00000055208;ENSG00000085733;ENSG00000097033;ENSG00000113520;ENSG00000121236;ENSG00000130147;ENSG00000132274;ENSG00000163565	TAB2;CTTN;SH3GLB1;IL4;TRIM6;SH3BP4;TRIM22;IFI16	0% (0/358)	0.00197464	2.7	NA	NA	3.352% (12/358)	0.00521391	2.28	ENSG00000055208;ENSG00000099910;ENSG00000116678;ENSG00000126775;ENSG00000136048;ENSG00000136634;ENSG00000145354;ENSG00000149557;ENSG00000157625;ENSG00000163251;ENSG00000163565;ENSG00000178752	TAB2;KLHL22;LEPR;ATG14;DRAM1;IL10;CISD2;FEZ1;TAB3;FZD5;IFI16;ERFE	0.279% (1/358)	0.00184392	2.73	ENSG00000134242	PTPN22
27	3.9	GO:0051172	negative regulation of nitrogen compound metabolic process	Any process that stops, prevents, or reduces the frequency, rate or extent of the chemical reactions and pathways involving nitrogen or nitrogenous compounds.	17.326% (381/2199)	0.0052487	2.28	ENSG00000001084;ENSG00000004487;ENSG00000004939;ENSG00000005156;ENSG00000005513;ENSG00000006118;ENSG00000006194;ENSG00000006712;ENSG00000007372;ENSG00000008083;ENSG00000009307;ENSG00000010165;ENSG00000011304;ENSG00000012223;ENSG00000021355;ENSG00000023734;ENSG00000024526;ENSG00000025434;ENSG00000026508;ENSG00000034713;ENSG00000037474;ENSG00000053254;ENSG00000054118;ENSG00000055332;ENSG00000057657…	GCLC;KDM1A;SLC4A1;LIG3;SOX8;TMEM132A;ZNF263;PAF1;PAX6;JARID2;CSDE1;METTL13;PTBP1;LTF;SERPINB1;STRAP;DEPDC1;NR1H3;CD44;GABARAPL2;NSUN2;FOXN3;THRAP3;EIF2AK2;PRDM1;ATP2B4;WNK1;SFSWAP;SPEN;ELAVL1;KDM4A;FGFR2;SP100;TP53BP1;TRO;PRKCZ;ROCK1;HDAC4;MEF2A;NEDD4;UBE2D1;NFATC3;FBXW11;XRCC1;KDM5A;PICALM;MLH1;CST7;GSK3B;EIF2AK1;UIMC1;ZNF343;DYNLL1;IRAK3;MAP3K20;TINF2;WAC;CIRBP;PATZ1;TFIP11;CBX7;RBFOX2;L3MBTL2;…	3.138% (69/2199)	0.0260456	1.58	NA	NA	0.182% (4/2199)	0.019488	1.71	NA	NA	2.774% (61/2199)	0.262446	0.58	NA	NA	0.864% (19/2199)	0.0203723	1.69	NA	NA
27	3.44	GO:0051173	positive regulation of nitrogen compound metabolic process	Any process that activates or increases the frequency, rate or extent of the chemical reactions and pathways involving nitrogen or nitrogenous compounds.	16.723% (499/2984)	0.12269	0.91	NA	NA	3.686% (110/2984)	0.0309111	1.51	NA	NA	0.268% (8/2984)	0.301767	0.52	NA	NA	2.782% (83/2984)	0.0225147	1.65	NA	NA	0.771% (23/2984)	0.00978237	2.01	ENSG00000012223;ENSG00000074966;ENSG00000081189;ENSG00000081377;ENSG00000110987;ENSG00000114315;ENSG00000119042;ENSG00000120162;ENSG00000122641;ENSG00000125249;ENSG00000129757;ENSG00000133169;ENSG00000134242;ENSG00000139174;ENSG00000147889;ENSG00000153064;ENSG00000157554;ENSG00000164047;ENSG00000172071;ENSG00000172232;ENSG00000177311;ENSG00000184349;ENSG00000229474	LTF;TXK;MEF2C;CDC14B;BCL7A;HES1;SATB2;MOB3B;INHBA;RAP2A;CDKN1C;BEX1;PTPN22;PRICKLE1;CDKN2A;BANK1;ERG;CAMP;EIF2AK3;AZU1;ZBTB38;EFNA5;PATL2
27	8.46	GO:0010712	regulation of collagen metabolic process	Any process that modulates the frequency, rate or extent of the chemical reactions and pathways resulting in the metabolism of collagen, any of a group of fibrous proteins of very high tensile strength that form the main component of connective tissue in animals.	25.641% (10/39)	0.468261	0.33	NA	NA	5.128% (2/39)	0.0257781	1.59	NA	NA	0% (0/39)	0.00829815	2.08	NA	NA	5.128% (2/39)	0.0313581	1.5	NA	NA	5.128% (2/39)	0.0449492	1.35	NA	NA
27	7.68	GO:1903578	regulation of ATP metabolic process	NA	16.667% (12/72)	0.0586094	1.23	NA	NA	4.167% (3/72)	0.027747	1.56	NA	NA	0% (0/72)	0.0101467	1.99	NA	NA	2.778% (2/72)	0.0260949	1.58	NA	NA	0% (0/72)	0.00963234	2.02	NA	NA
27	6.38	GO:0033674	positive regulation of kinase activity	Any process that activates or increases the frequency, rate or extent of kinase activity, the catalysis of the transfer of a phosphate group, usually from ATP, to a substrate molecule.	19.713% (55/279)	0.0728888	1.14	NA	NA	6.81% (19/279)	0.0109452	1.96	NA	NA	0% (0/279)	0.0319823	1.5	NA	NA	3.584% (10/279)	0.00335557	2.47	ENSG00000012223;ENSG00000055208;ENSG00000088325;ENSG00000106462;ENSG00000136810;ENSG00000138685;ENSG00000150337;ENSG00000157168;ENSG00000163221;ENSG00000168615	LTF;TAB2;TPX2;EZH2;TXN;FGF2;FCGR1A;NRG1;S100A12;ADAM9	0.717% (2/279)	0.0313587	1.5	NA	NA
27	4.83	GO:0042325	regulation of phosphorylation	Any process that modulates the frequency, rate or extent of addition of phosphate groups into a molecule.	17.684% (168/950)	0.0980347	1.01	NA	NA	4.842% (46/950)	0.00200143	2.7	ENSG00000009694;ENSG00000012223;ENSG00000026508;ENSG00000055208;ENSG00000087589;ENSG00000099250;ENSG00000108861;ENSG00000108950;ENSG00000108984;ENSG00000111961;ENSG00000113448;ENSG00000113520;ENSG00000115170;ENSG00000116717;ENSG00000120156;ENSG00000121236;ENSG00000121594;ENSG00000121989;ENSG00000123080;ENSG00000124205;ENSG00000129757;ENSG00000130340;ENSG00000132170;ENSG00000133048;ENSG00000134817…	TENM1;LTF;CD44;TAB2;CASS4;NRP1;DUSP3;FAM20A;MAP2K6;SASH1;PDE4D;IL4;ACVR1;GADD45A;TEK;TRIM6;CD80;ACVR2A;CDKN2C;EDN3;CDKN1C;SNX9;PPARG;CHI3L1;APLNR;CD36;TXN;PARP9;HERC5;CDKN2B;FCGR1A;ADRA2A;PID1;ANGPT1;SAMSN1;TTN;BAG4;NRG1;LRP8;S100A12;CAMP;ADAM9;FAXDC2;SOCS3;HLA-DRB1;ERCC6	0.316% (3/950)	0.0107333	1.97	NA	NA	3.579% (34/950)	0.0249714	1.6	NA	NA	1.368% (13/950)	0.0159358	1.8	NA	NA
27	4.64	GO:0019220	regulation of phosphate metabolic process	Any process that modulates the frequency, rate or extent of the chemical reactions and pathways involving phosphates.	18.117% (202/1115)	0.0135832	1.87	NA	NA	4.753% (53/1115)	0.0798297	1.1	NA	NA	0.359% (4/1115)	0.0045025	2.35	ENSG00000026103;ENSG00000081189;ENSG00000120162;ENSG00000153064	FAS;MEF2C;MOB3B;BANK1	3.229% (36/1115)	0.00261376	2.58	ENSG00000012223;ENSG00000055208;ENSG00000072274;ENSG00000088325;ENSG00000088986;ENSG00000089041;ENSG00000094804;ENSG00000106462;ENSG00000108861;ENSG00000108950;ENSG00000108984;ENSG00000114166;ENSG00000116678;ENSG00000116717;ENSG00000119630;ENSG00000122641;ENSG00000125249;ENSG00000126775;ENSG00000135218;ENSG00000136810;ENSG00000138376;ENSG00000138496;ENSG00000138685;ENSG00000147324;ENSG00000147883…	LTF;TAB2;TFRC;TPX2;DYNLL1;P2RX7;CDC6;EZH2;DUSP3;FAM20A;MAP2K6;KAT2B;LEPR;GADD45A;PGF;INHBA;RAP2A;ATG14;CD36;TXN;BARD1;PARP9;FGF2;MFHAS1;CDKN2B;CDKN2A;FCGR1A;SAMSN1;NRG1;KIT;S100A12;CAMP;TERF2IP;ADAM9;HEXIM1;ERCC6	1.256% (14/1115)	0.00201978	2.69	ENSG00000012223;ENSG00000081189;ENSG00000114315;ENSG00000120162;ENSG00000122641;ENSG00000125249;ENSG00000129757;ENSG00000134242;ENSG00000147889;ENSG00000153064;ENSG00000164047;ENSG00000172071;ENSG00000172232;ENSG00000184349	LTF;MEF2C;HES1;MOB3B;INHBA;RAP2A;CDKN1C;PTPN22;CDKN2A;BANK1;CAMP;EIF2AK3;AZU1;EFNA5
27	10.23	GO:2000609	regulation of thyroid hormone generation	NA	14.286% (1/7)	0.023772	1.62	NA	NA	0% (0/7)	0.0064017	2.19	NA	NA	0% (0/7)	0.00803297	2.1	NA	NA	0% (0/7)	0.00693904	2.16	NA	NA	0% (0/7)	0.00777812	2.11	NA	NA
27	6.9	GO:0043467	regulation of generation of precursor metabolites and energy	Any process that modulates the frequency, rate or extent of the chemical reactions and pathways resulting in the formation of precursor metabolites, substances from which energy is derived, and the processes involved in the liberation of energy from these substances.	22.794% (31/136)	0.306643	0.51	NA	NA	4.412% (6/136)	0.0211344	1.68	NA	NA	0% (0/136)	0.00707061	2.15	NA	NA	2.941% (4/136)	0.0193974	1.71	NA	NA	0% (0/136)	0.00562189	2.25	NA	NA
27	3.42	GO:0031328	positive regulation of cellular biosynthetic process	Any process that activates or increases the frequency, rate or extent of the chemical reactions and pathways resulting in the formation of substances, carried out by individual cells.	17.104% (456/2666)	0.00638155	2.2	ENSG00000002745;ENSG00000004487;ENSG00000005007;ENSG00000005302;ENSG00000005513;ENSG00000006194;ENSG00000006459;ENSG00000006712;ENSG00000007372;ENSG00000009307;ENSG00000009954;ENSG00000010671;ENSG00000011304;ENSG00000011465;ENSG00000012822;ENSG00000013503;ENSG00000013561;ENSG00000019582;ENSG00000020256;ENSG00000025293;ENSG00000025434;ENSG00000026025;ENSG00000029153;ENSG00000037280;ENSG00000049541…	WNT16;KDM1A;UPF1;MSL3;SOX8;ZNF263;KDM7A;PAF1;PAX6;CSDE1;BAZ1B;BTK;PTBP1;DCN;CALCOCO1;POLR3B;RNF14;CD74;ZFP64;PHF20;NR1H3;VIM;BMAL2;FLT4;RFC2;THRAP3;EIF2AK2;PRDM1;PITHD1;PPP1R12A;WNK1;RNF4;CDK13;ELAVL1;KDM4A;FGFR2;ZFAT;SP100;KLF6;DHX29;TP53BP1;PRKCZ;ROCK1;HDAC4;MEF2A;RAB27A;TFRC;NFATC3;FBXW11;KDM5A;PICALM;TXK;EIF4G3;MLH1;IL4R;JADE1;TP53INP2;HSP90AA1;IL12RB2;SMARCD3;GSK3B;P2RX7;IRAK3;NLRC4;SUPT16H;…	3.976% (106/2666)	0.0708834	1.15	NA	NA	0.188% (5/2666)	0.065399	1.18	NA	NA	2.663% (71/2666)	0.0550066	1.26	NA	NA	0.638% (17/2666)	0.0568454	1.25	NA	NA
27	3.13	GO:0031325	positive regulation of cellular metabolic process	Any process that activates or increases the frequency, rate or extent of the chemical reactions and pathways by which individual cells transform chemical substances.	17.32% (574/3314)	0.0826795	1.08	NA	NA	4.164% (138/3314)	0.0348494	1.46	NA	NA	0.241% (8/3314)	0.008118	2.09	ENSG00000020577;ENSG00000026103;ENSG00000081189;ENSG00000120162;ENSG00000134323;ENSG00000152556;ENSG00000153064;ENSG00000162924	SAMD4A;FAS;MEF2C;MOB3B;MYCN;PFKM;BANK1;REL	2.776% (92/3314)	0.0394084	1.4	NA	NA	0.785% (26/3314)	0.00939665	2.03	ENSG00000012223;ENSG00000074966;ENSG00000081189;ENSG00000095585;ENSG00000110987;ENSG00000114315;ENSG00000118113;ENSG00000119042;ENSG00000120162;ENSG00000122641;ENSG00000122986;ENSG00000125249;ENSG00000129757;ENSG00000133169;ENSG00000134242;ENSG00000135077;ENSG00000147889;ENSG00000153064;ENSG00000157554;ENSG00000164047;ENSG00000172071;ENSG00000172232;ENSG00000177311;ENSG00000184349;ENSG00000196781…	LTF;TXK;MEF2C;BLNK;BCL7A;HES1;MMP8;SATB2;MOB3B;INHBA;HVCN1;RAP2A;CDKN1C;BEX1;PTPN22;HAVCR2;CDKN2A;BANK1;ERG;CAMP;EIF2AK3;AZU1;ZBTB38;EFNA5;TLE1;PATL2
28	7.68	GO:0032720	negative regulation of tumor necrosis factor production	Any process that stops, prevents, or reduces the frequency, rate, or extent of tumor necrosis factor production.	16.393% (10/61)	0.0105802	1.98	NA	NA	4.918% (3/61)	0.000406961	3.39	ENSG00000049768;ENSG00000113520;ENSG00000239961	FOXP3;IL4;LILRA4	0% (0/61)	0.000111027	3.95	NA	NA	3.279% (2/61)	0.000531739	3.27	ENSG00000101425;ENSG00000136634	BPI;IL10	4.918% (3/61)	0.00198451	2.7	ENSG00000101425;ENSG00000134242;ENSG00000135077	BPI;PTPN22;HAVCR2
28	9.36	GO:0032700	negative regulation of interleukin-17 production	Any process that stops, prevents, or reduces the frequency, rate, or extent of production of any member of the interleukin-17 family of cytokines.	13.333% (2/15)	0.0246235	1.61	NA	NA	6.667% (1/15)	0.0191683	1.72	NA	NA	0% (0/15)	0.00540248	2.27	NA	NA	0% (0/15)	0.00438821	2.36	NA	NA	0% (0/15)	0.00515066	2.29	NA	NA
28	8.18	GO:0032480	negative regulation of type I interferon production	Any process that stops, prevents, or reduces the frequency, rate, or extent of type I interferon production. Type I interferons include the interferon-alpha, beta, delta, episilon, zeta, kappa, tau, and omega gene families.	23.256% (10/43)	0.141505	0.85	NA	NA	9.302% (4/43)	0.0202198	1.69	NA	NA	2.326% (1/43)	0.00373391	2.43	ENSG00000162924	REL	6.977% (3/43)	0.0208504	1.68	NA	NA	2.326% (1/43)	0.00358978	2.44	ENSG00000135077	HAVCR2
28	5.69	GO:0001818	negative regulation of cytokine production	Any process that stops, prevents, or reduces the rate of production of a cytokine.	19.031% (55/289)	6.88e-05	4.16	ENSG00000008438;ENSG00000010671;ENSG00000011275;ENSG00000012223;ENSG00000021355;ENSG00000070010;ENSG00000078747;ENSG00000081181;ENSG00000090376;ENSG00000090432;ENSG00000099910;ENSG00000100387;ENSG00000100697;ENSG00000101425;ENSG00000101916;ENSG00000102760;ENSG00000105127;ENSG00000105426;ENSG00000105483;ENSG00000105639;ENSG00000106462;ENSG00000111537;ENSG00000111729;ENSG00000113520;ENSG00000113916…	PGLYRP1;BTK;RNF216;LTF;SERPINB1;UFD1;ITCH;ARG2;IRAK3;MUL1;KLHL22;RBX1;DICER1;BPI;TLR8;RGCC;AKAP8;PTPRS;CARD8;JAK3;EZH2;IFNG;CLEC4A;IL4;BCL6;FN1;IL1RL1;TNFAIP3;ARG1;CD274;INHBA;SRGN;NMI;CCR7;ANXA1;IL10;ARRB1;EPHA2;ANGPT1;NDRG2;NLRP7;LGALS9B;KAT5;TLR6;TRAIP;APOD;HLA-DRB1;ANXA4;SLC2A10;ELANE;PDCD1LG2;CD2AP;CR1;CARD16;LILRA4	5.19% (15/289)	0.000146637	3.83	ENSG00000012223;ENSG00000049768;ENSG00000078747;ENSG00000088827;ENSG00000111331;ENSG00000113520;ENSG00000118520;ENSG00000120217;ENSG00000132530;ENSG00000135046;ENSG00000154188;ENSG00000165795;ENSG00000196126;ENSG00000204397;ENSG00000239961	LTF;FOXP3;ITCH;SIGLEC1;OAS3;IL4;ARG1;CD274;XAF1;ANXA1;ANGPT1;NDRG2;HLA-DRB1;CARD16;LILRA4	1.038% (3/289)	0.00115182	2.94	ENSG00000070961;ENSG00000153064;ENSG00000162924	ATP2B1;BANK1;REL	3.806% (11/289)	0.000248985	3.6	ENSG00000012223;ENSG00000099910;ENSG00000100387;ENSG00000101425;ENSG00000106462;ENSG00000117228;ENSG00000120217;ENSG00000122641;ENSG00000136634;ENSG00000197646;ENSG00000198087	LTF;KLHL22;RBX1;BPI;EZH2;GBP1;CD274;INHBA;IL10;PDCD1LG2;CD2AP	2.076% (6/289)	0.00112827	2.95	ENSG00000012223;ENSG00000101425;ENSG00000122641;ENSG00000134242;ENSG00000135077;ENSG00000153064	LTF;BPI;INHBA;PTPN22;HAVCR2;BANK1
28	8.03	GO:0032715	negative regulation of interleukin-6 production	Any process that stops, prevents, or reduces the frequency, rate, or extent of interleukin-6 production.	10.417% (5/48)	0.0117413	1.93	NA	NA	2.083% (1/48)	0.00577732	2.24	ENSG00000049768	FOXP3	2.083% (1/48)	0.00421732	2.37	ENSG00000153064	BANK1	4.167% (2/48)	0.0169586	1.77	NA	NA	8.333% (4/48)	0.0474948	1.32	NA	NA
28	4.26	GO:0010628	positive regulation of gene expression	Any process that increases the frequency, rate or extent of gene expression. Gene expression is the process in which a gene's coding sequence is converted into a mature gene product (protein or RNA).	20.666% (242/1171)	0.00138416	2.86	ENSG00000002745;ENSG00000005007;ENSG00000005513;ENSG00000007372;ENSG00000009307;ENSG00000010671;ENSG00000012822;ENSG00000013503;ENSG00000019582;ENSG00000026025;ENSG00000037280;ENSG00000054118;ENSG00000055332;ENSG00000057657;ENSG00000066044;ENSG00000066135;ENSG00000067248;ENSG00000067369;ENSG00000067606;ENSG00000067900;ENSG00000068305;ENSG00000069974;ENSG00000072274;ENSG00000074966;ENSG00000075151…	WNT16;UPF1;SOX8;PAX6;CSDE1;BTK;CALCOCO1;POLR3B;CD74;VIM;FLT4;THRAP3;EIF2AK2;PRDM1;ELAVL1;KDM4A;DHX29;TP53BP1;PRKCZ;ROCK1;MEF2A;RAB27A;TFRC;TXK;EIF4G3;MLH1;IL4R;HSP90AA1;IL12RB2;GSK3B;P2RX7;IRAK3;NLRC4;WHRN;JAK2;CIRBP;SMARCB1;OSM;POLDIP3;HMOX1;NTSR1;CDK5RAP1;RIOK3;TLR8;DNAJC3;RGCC;NFAT5;SLC7A5;KAT8;MED26;CARD8;CDK6;ITGB8;ZC3HAV1;TFR2;TGFBR1;C5;FUBP3;RIGI;SETX;CPEB3;WNT3;RPS6KB1;CLNK;PPARGC1A;ZPR1;…	5.38% (63/1171)	4.16e-07	6.38	ENSG00000008517;ENSG00000049768;ENSG00000055332;ENSG00000057657;ENSG00000068305;ENSG00000105810;ENSG00000105855;ENSG00000105939;ENSG00000107201;ENSG00000107290;ENSG00000108576;ENSG00000111331;ENSG00000111335;ENSG00000112062;ENSG00000113448;ENSG00000113520;ENSG00000115267;ENSG00000116044;ENSG00000118113;ENSG00000120217;ENSG00000120949;ENSG00000121236;ENSG00000121594;ENSG00000121807;ENSG00000122420…	IL32;FOXP3;EIF2AK2;PRDM1;MEF2A;CDK6;ITGB8;ZC3HAV1;RIGI;SETX;SLC6A4;OAS3;OAS2;MAPK14;PDE4D;IL4;IFIH1;NFE2L2;MMP8;CD274;TNFRSF8;TRIM6;CD80;CCR2;PTGFR;LDLR;AKAP12;PPARG;CHI3L1;LAMTOR5;RSAD2;ANXA1;CD36;KAT7;CASP1;CYP1B1;EIF4A3;HNRNPLL;ANK2;ADRA2A;PID1;ANGPT1;LY96;GRIA1;TTN;EDA;IFI16;PF4;HMGB2;CGAS;MYD88;RBM4B;GATA2;NOG;PLSCR1;S100A10;CLEC9A;HLA-DPB1;ERCC6;HLA-DPA1;NAIP;PVT1;CLEC5A	0.256% (3/1171)	1.08e-09	8.97	ENSG00000020577;ENSG00000081189;ENSG00000134323	SAMD4A;MEF2C;MYCN	3.587% (42/1171)	5.19e-09	8.28	ENSG00000009307;ENSG00000072274;ENSG00000074966;ENSG00000089041;ENSG00000099622;ENSG00000101412;ENSG00000105939;ENSG00000106804;ENSG00000111249;ENSG00000112062;ENSG00000114166;ENSG00000118113;ENSG00000120217;ENSG00000122420;ENSG00000122641;ENSG00000129691;ENSG00000135218;ENSG00000135960;ENSG00000136634;ENSG00000137752;ENSG00000138685;ENSG00000143889;ENSG00000147889;ENSG00000152332;ENSG00000156515…	CSDE1;TFRC;TXK;P2RX7;CIRBP;E2F1;ZC3HAV1;C5;CUX2;MAPK14;KAT2B;MMP8;CD274;PTGFR;INHBA;ASH2L;CD36;EDAR;IL10;CASP1;FGF2;HNRNPLL;CDKN2A;UHMK1;HK1;KIT;FZD5;IFI16;AIM2;CGAS;TMIGD2;C3AR1;RBM4B;NOG;FFAR3;PLSCR1;TLE1;PNP;NOS1AP;ERCC6;NAIP;CLEC5A	1.025% (12/1171)	1.39e-09	8.86	ENSG00000074966;ENSG00000081189;ENSG00000095585;ENSG00000114315;ENSG00000118113;ENSG00000122641;ENSG00000134242;ENSG00000135077;ENSG00000147889;ENSG00000172071;ENSG00000172232;ENSG00000196781	TXK;MEF2C;BLNK;HES1;MMP8;INHBA;PTPN22;HAVCR2;CDKN2A;EIF2AK3;AZU1;TLE1
28	8.97	GO:0071636	positive regulation of transforming growth factor beta production	Any process that activates or increases the frequency, rate, or extent of production of transforming growth factor-beta.	9.091% (2/22)	0.00687795	2.16	ENSG00000139329;ENSG00000167711	LUM;SERPINF2	4.545% (1/22)	0.0230461	1.64	NA	NA	0% (0/22)	0.0117395	1.93	NA	NA	0% (0/22)	0.00781801	2.11	NA	NA	0% (0/22)	0.0108006	1.97	NA	NA
28	4.8	GO:0001819	positive regulation of cytokine production	Any process that activates or increases the frequency, rate or extent of production of a cytokine.	22.84% (111/486)	0.48021	0.32	NA	NA	7.613% (37/486)	0.0484855	1.31	NA	NA	0% (0/486)	0.000909011	3.04	NA	NA	4.527% (22/486)	0.0154817	1.81	NA	NA	1.235% (6/486)	0.00251771	2.6	ENSG00000074966;ENSG00000118113;ENSG00000134242;ENSG00000135077;ENSG00000172071;ENSG00000172232	TXK;MMP8;PTPN22;HAVCR2;EIF2AK3;AZU1
28	7.81	GO:0032663	regulation of interleukin-2 production	Any process that modulates the frequency, rate, or extent of interleukin-2 production.	16.129% (10/62)	0.0334697	1.48	NA	NA	8.065% (5/62)	0.12746	0.89	NA	NA	0% (0/62)	0.0078832	2.1	NA	NA	3.226% (2/62)	0.0117157	1.93	NA	NA	1.613% (1/62)	0.0154569	1.81	NA	NA
28	8.3	GO:0071634	regulation of transforming growth factor beta production	Any process that modulates the frequency, rate, or extent of production of transforming growth factor-beta.	17.5% (7/40)	0.0808896	1.09	NA	NA	5% (2/40)	0.00181886	2.74	ENSG00000049768;ENSG00000105855	FOXP3;ITGB8	0% (0/40)	0.00903328	2.04	NA	NA	2.5% (1/40)	0.167748	0.78	NA	NA	0% (0/40)	0.00869881	2.06	NA	NA
28	9.74	GO:1901388	regulation of transforming growth factor beta activation	NA	30% (3/10)	0.171907	0.76	NA	NA	10% (1/10)	0.025833	1.59	NA	NA	0% (0/10)	0.00533039	2.27	NA	NA	0% (0/10)	0.00423872	2.37	NA	NA	0% (0/10)	0.00507956	2.29	NA	NA
29	10.11	GO:0048290	isotype switching to IgA isotypes	The switching of activated B cells from IgM biosynthesis to biosynthesis of an IgA isotype, accomplished through a recombination process involving an intrachromosomal deletion between switch regions that reside 5' of the IgM and one of the IgA constant region gene segments in the immunoglobulin heavy chain locus.	14.286% (1/7)	0.0356764	1.45	NA	NA	0% (0/7)	0.00774129	2.11	NA	NA	0% (0/7)	0.00893894	2.05	NA	NA	0% (0/7)	0.00809864	2.09	NA	NA	0% (0/7)	0.00877768	2.06	NA	NA
29	8.43	GO:0045830	positive regulation of isotype switching	Any process that activates or increases the frequency, rate or extent of isotype switching.	20.69% (6/29)	0.0219968	1.66	NA	NA	3.448% (1/29)	0.00278796	2.55	ENSG00000113520	IL4	0% (0/29)	0.00103742	2.98	NA	NA	3.448% (1/29)	0.00308396	2.51	ENSG00000072274	TFRC	0% (0/29)	0.000991991	3	NA	NA
29	8.16	GO:0045191	regulation of isotype switching	Any process that modulates the frequency, rate or extent of isotype switching.	23.684% (9/38)	0.00950539	2.02	ENSG00000067369;ENSG00000072274;ENSG00000076242;ENSG00000113520;ENSG00000113916;ENSG00000136634;ENSG00000166888;ENSG00000169621;ENSG00000183624	TP53BP1;TFRC;MLH1;IL4;BCL6;IL10;STAT6;APLF;HMCES	5.263% (2/38)	0.0701436	1.15	NA	NA	0% (0/38)	0.171054	0.77	NA	NA	5.263% (2/38)	0.23202	0.63	NA	NA	0% (0/38)	0.16833	0.77	NA	NA
29	9.42	GO:0048302	regulation of isotype switching to IgG isotypes	Any process that modulates the frequency, rate or extent of isotype switching to IgG isotypes.	13.333% (2/15)	0.0374471	1.43	NA	NA	13.333% (2/15)	0.0971505	1.01	NA	NA	0% (0/15)	0.00898888	2.05	NA	NA	0% (0/15)	0.00759	2.12	NA	NA	0% (0/15)	0.00867106	2.06	NA	NA
29	7.47	GO:0002637	regulation of immunoglobulin production	Any process that modulates the frequency, rate, or extent of immunoglobulin production.	18.667% (14/75)	0.0831896	1.08	NA	NA	4% (3/75)	0.00616855	2.21	ENSG00000049768;ENSG00000113520;ENSG00000164430	FOXP3;IL4;CGAS	0% (0/75)	0.024302	1.61	NA	NA	4% (3/75)	0.0403445	1.39	NA	NA	1.333% (1/75)	0.0505726	1.3	NA	NA
29	8.02	GO:0002701	negative regulation of production of molecular mediator of immune response	Any process that stops, prevents, or reduces the frequency, rate, or extent of the production of molecular mediator of immune response.	18.182% (8/44)	0.0900813	1.05	NA	NA	6.818% (3/44)	0.0588844	1.23	NA	NA	0% (0/44)	0.00943897	2.03	NA	NA	2.273% (1/44)	0.0143604	1.84	NA	NA	2.273% (1/44)	0.0206256	1.69	NA	NA
[truncated: 900 more rows]

## Sheet: GO_4groups
Group	GO.ID	GO.name	value	cluster	IC	GO.ID	term	definition
[truncated: 1,453 more rows]
