# Supplementary material for: How epigenetic clocks tick: Unpacking the black box by deciphering biological pathways and transcriptomic signatures of accelerated aging
Source: Research Square preprint supplement (doi:10.21203/rs.3.rs-8844558/v1), 2026-03-16
Supplement: Supplementary file 3 [file 70c9c7c69076479b6314a5fb.xlsx]

## Sheet: a.Horvath
Table S1a. Differentially Expressed Genes for the Horvath Clock at FDR<.01
Ensemble Name	base mean	coefficient (log2)	coefficient (natural)	pvalue	qval	FDR-adjustedP	Gene Symbol
ENSG00000081189.15	6.80141	-0.00769934	0.994677	1.37824e-09	5.70139e-05	6.46297e-05	MEF2C
ENSG00000138670.17	4.70651	-0.00790461	0.994536	3.36932e-09	6.12813e-05	6.46297e-05	RASGEF1B
ENSG00000020577.13	3.27522	-0.0119114	0.991778	4.50292e-09	6.20911e-05	0.000130272	SAMD4A
ENSG00000164330.16	2.69588	-0.0178626	0.987695	9.44569e-09	8.55098e-05	0.000130272	EBF1
ENSG00000197520.10	1.51499	-0.0165184	0.988616	1.13802e-08	9.08143e-05	0.000130272	FAM177B
ENSG00000153253.16	2.56823	-0.0230273	0.984165	1.39504e-08	9.61814e-05	0.000202438	SCN3A
ENSG00000120053.10	3.25636	0.00664535	1.00462	3.47904e-08	0.000173615	0.000511553	GOT1
ENSG00000152556.15	3.45658	0.00673557	1.00468	5.03016e-08	0.000218029	0.000511553	PFKM
ENSG00000174080.10	2.79807	0.0108022	1.00752	1.8844e-08	0.000111361	0.000511553	CTSF
ENSG00000117009.11	3.8557	-0.00979267	0.993235	5.59424e-08	0.000231419	0.00106653	KMO
ENSG00000224617.1	-2.06804	-0.000227047	0.999843	1.067e-07	0.000368786	0.00106653
ENSG00000082293.12	4.37314	-0.0196901	0.986445	1.91709e-07	0.000534063	0.00122247	COL19A1
ENSG00000112655.15	1.28037	0.013674	1.00952	2.56476e-07	0.000622598	0.00122247	PTK7
ENSG00000120162.9	3.38482	-0.00765855	0.994706	2.28687e-07	0.000587564	0.00122247	MOB3B
ENSG00000134323.11	-1.67551	0.0101447	1.00706	1.4562e-07	0.000453275	0.00122247	MYCN
ENSG00000251149.1	1.24151	-0.0159882	0.988979	2.45945e-07	0.000609787	0.00122247	MTND5P5
ENSG00000251513.2	2.44515	-0.0184851	0.987269	1.07506e-07	0.000370603	0.00122247	LIX1-AS1
ENSG00000211947.2	1.44736	-0.0177594	0.987766	2.84816e-07	0.000654558	0.00144402	IGHV3-21
ENSG00000115457.9	-0.135454	0.0227239	1.01588	3.19723e-07	0.000696108	0.00145583	IGFBP2
ENSG00000162924.13	6.52642	-0.0038256	0.997352	3.67222e-07	0.000746497	0.00145583	REL
ENSG00000253535.5	0.816788	-0.0150103	0.98965	4.22519e-07	0.000797341	0.00145583	ADAM7-AS1
ENSG00000152894.14	2.6586	-0.0161837	0.988845	4.25301e-07	0.000799707	0.00174184	PTPRK
ENSG00000070961.15	8.00565	-0.0048241	0.996662	4.67408e-07	0.000840669	0.00196306	ATP2B1
ENSG00000107968.9	6.12169	-0.00433344	0.997001	6.81031e-07	0.00102439	0.00196306	MAP3K8
ENSG00000184305.14	3.22423	-0.0106239	0.992663	6.7608e-07	0.00102081	0.00196306	CCSER1
ENSG00000211950.2	-0.798049	-0.0146578	0.989891	5.2097e-07	0.000893173	0.00196306	IGHV1-24
ENSG00000211962.2	-0.162261	-0.0161336	0.988879	7.03611e-07	0.00104035	0.00196306	IGHV1-46
ENSG00000026103.21	6.49378	-0.00752733	0.994796	7.0468e-07	0.0010411	0.00244236	FAS
ENSG00000105889.14	0.0542319	-0.0152354	0.989495	8.07708e-07	0.0011233	0.00244236	STEAP1B
ENSG00000231711.2	2.96596	0.00817221	1.00568	8.77486e-07	0.00117371	0.00244236	LINC00899
ENSG00000033050.7	4.24882	0.00487589	1.00339	1.35876e-06	0.00154352	0.00364329	ABCF2
ENSG00000101000.5	0.287144	0.0120644	1.0084	8.81803e-07	0.0011767	0.00364329	PROCR
ENSG00000142798.17	0.776668	0.0143735	1.01001	1.14141e-06	0.00139088	0.00364329	HSPG2
ENSG00000162543.5	2.50908	0.0121976	1.00849	1.45393e-06	0.00160403	0.00364329	UBXN10
ENSG00000175556.16	3.84265	0.00577287	1.00401	1.06916e-06	0.0013351	0.00364329	LONRF3
ENSG00000186716.20	5.98584	0.00850432	1.00591	1.35324e-06	0.0015399	0.00364329	BCR
ENSG00000198399.14	8.24377	-0.00332241	0.9977	1.60785e-06	0.00169485	0.00364329	ITSN2
ENSG00000234572.1	0.127271	-0.0136388	0.990591	1.29613e-06	0.0015017	0.00364329	LINC01800
ENSG00000261997.1	4.24773	-0.00951631	0.993426	1.56507e-06	0.00167043	0.00364329
ENSG00000137824.15	4.42131	0.0053082	1.00369	1.86709e-06	0.00186073	0.00528246	RMDN3
ENSG00000153064.11	5.67213	-0.0125589	0.991333	2.20053e-06	0.00206324	0.00528246	BANK1
ENSG00000156738.17	6.59807	-0.0146222	0.989916	1.67445e-06	0.00173168	0.00528246	MS4A1
ENSG00000163534.14	6.17531	-0.0157436	0.989147	2.2886e-06	0.00211279	0.00528246	FCRL1
ENSG00000248309.7	2.87553	-0.00775841	0.994637	1.95919e-06	0.00191917	0.00528246	MEF2C-AS1
ENSG00000104325.6	6.84519	-0.00419284	0.997098	3.25707e-06	0.00260111	0.00574409	DECR1
ENSG00000114450.9	6.66751	-0.00680863	0.995292	3.25098e-06	0.00259845	0.00574409	GNB4
ENSG00000128872.9	6.8532	-0.00562064	0.996112	2.73306e-06	0.00235414	0.00574409	TMOD2
ENSG00000148110.15	6.67425	-0.00594536	0.995887	3.38745e-06	0.00265707	0.00574409	MFSD14B
ENSG00000183960.8	2.1233	-0.0167228	0.988476	3.02566e-06	0.00249663	0.00574409	KCNH8
ENSG00000184226.14	5.17598	-0.0178365	0.987713	2.80802e-06	0.00239183	0.00574409	PCDH9
ENSG00000240671.4	-0.269817	-0.0152119	0.989511	2.9825e-06	0.00247637	0.00574409	IGKV1-8
ENSG00000253924.1	0.925295	-0.0156185	0.989232	2.31293e-06	0.00212622	0.00574409

## Sheet: b.Hannum
Table S1b. Differentially Expressed Genes for the Hannum Clock at FDR<.01
Ensemble Name	base mean	coefficient (log2)	coefficient (natural)	pvalue	qval	FDR-adjustedP	Gene Symbol
ENSG00000124225.15	1.71046	-0.0222111	0.984722	1.84e-13	8.5e-09	6.18e-08	PMEPA1
ENSG00000152894.14	2.66362	-0.0260833	0.982083	1.52e-12	3.52e-08	1.93e-07	PTPRK
ENSG00000164330.16	2.69995	-0.0247224	0.98301	5.69e-12	8.77e-08	2.66e-07	EBF1
ENSG00000138670.17	4.70814	-0.0104707	0.992769	1.15e-11	1.32e-07	1.31e-05	RASGEF1B
ENSG00000106537.7	2.69297	-0.017244	0.988118	1e-09	6.68e-06	1.69e-05	TSPAN13
ENSG00000227945.1	-0.685416	-0.023146	0.984084	2.96e-10	2.74e-06	1.69e-05	PTPRK-AS1
ENSG00000133424.20	3.11061	-0.0207268	0.985736	1.03e-09	6.77e-06	2.09e-05	LARGE1
ENSG00000232022.7	1.60591	0.0216514	1.01512	1.48e-09	8.53e-06	2.84e-05	FAAHP1
ENSG00000082293.12	4.37698	-0.0254932	0.982485	5.22e-09	1.96e-05	4.4e-05	COL19A1
ENSG00000100448.3	0.423037	0.0284567	1.01992	7.48e-09	2.36e-05	4.4e-05	CTSG
ENSG00000117322.17	2.70694	-0.0220388	0.98484	3.81e-09	1.63e-05	4.4e-05	CR2
ENSG00000153253.16	2.57209	-0.0280761	0.980727	2.09e-09	1.07e-05	4.4e-05	SCN3A
ENSG00000163520.13	0.367953	-0.0221823	0.984742	6.01e-09	2.12e-05	4.4e-05	FBLN2
ENSG00000196781.14	3.35556	-0.0131402	0.990933	4.16e-09	1.72e-05	4.4e-05	TLE1
ENSG00000251149.1	1.24459	-0.020582	0.985835	8.69e-09	2.52e-05	4.4e-05	MTND5P5
ENSG00000251513.2	2.44846	-0.0231008	0.984115	8.88e-09	2.54e-05	4.4e-05	LIX1-AS1
ENSG00000091129.19	0.402634	-0.0275907	0.981057	1.72e-08	3.63e-05	7.07e-05	NRCAM
ENSG00000120162.9	3.38622	-0.00966062	0.993326	1.58e-08	3.48e-05	7.07e-05	MOB3B
ENSG00000184305.14	3.22636	-0.0139124	0.990403	1.74e-08	3.65e-05	7.07e-05	CCSER1
ENSG00000198046.11	0.982399	-0.020139	0.986138	1.67e-08	3.58e-05	7.07e-05	ZNF667
ENSG00000224617.1	-2.068	-0.000282933	0.999804	9.7e-09	2.64e-05	7.07e-05
ENSG00000278897.1	3.50567	-0.0107233	0.992595	1.38e-08	3.25e-05	7.07e-05
ENSG00000079819.18	3.8724	-0.0101456	0.992992	3.04e-08	5.19e-05	0.000129661	EPB41L2
ENSG00000110987.8	2.30422	-0.0169044	0.988351	2.46e-08	4.54e-05	0.000129661	BCL7A
ENSG00000119042.16	0.189678	0.0181573	1.01267	2.59e-08	4.7e-05	0.000129661	SATB2
ENSG00000133169.5	-1.26028	0.0184609	1.01288	1.89e-08	3.79e-05	0.000129661	BEX1
ENSG00000185112.5	3.71436	-0.0105497	0.992714	2.86e-08	4.99e-05	0.000129661	FAM43A
ENSG00000177311.11	6.98649	0.00773843	1.00538	3.29e-08	5.43e-05	0.000168512	ZBTB38
ENSG00000186417.13	-1.49361	0.015304	1.01066	3.92e-08	6.1e-05	0.000168512	GLDN
ENSG00000157734.13	4.27568	-0.0158632	0.989065	4.86e-08	7.25e-05	0.000385905	SNX22
ENSG00000228495.1	0.377807	-0.0267621	0.981621	4.02e-08	6.19e-05	0.000385905	LINC01013
ENSG00000118113.11	2.47035	0.0328199	1.02301	5.69e-08	8.22e-05	0.000397859	MMP8
ENSG00000005381.7	2.10891	0.0204911	1.0143	1.93e-07	0.000192035	0.000436361	MPO
ENSG00000005471.15	2.96128	-0.0193961	0.986646	1.97e-07	0.000193855	0.000436361	ABCB4
ENSG00000112182.14	5.78342	-0.0126581	0.991264	1.88e-07	0.000188828	0.000436361	BACH2
ENSG00000117009.11	3.857	-0.0109871	0.992413	1.33e-07	0.000153451	0.000436361	KMO
ENSG00000134909.18	3.84903	-0.00895481	0.993812	7.51e-08	0.000102119	0.000436361	ARHGAP32
ENSG00000163534.14	6.17836	-0.0203304	0.986007	1.25e-07	0.000147112	0.000436361	FCRL1
ENSG00000168952.15	-0.962766	0.0175252	1.01222	1.18e-07	0.000141782	0.000436361	STXBP6
ENSG00000176092.14	0.847582	0.013441	1.00936	1.27e-07	0.000148285	0.000436361	CRYBG2
ENSG00000176293.19	1.54779	-0.016952	0.988319	1.98e-07	0.000194434	0.000436361	ZNF135
ENSG00000179869.14	3.87079	0.0264362	1.01849	1.36e-07	0.000155139	0.000436361	ABCA13
ENSG00000198574.5	3.95182	-0.0158064	0.989104	1.9e-07	0.000190459	0.000436361	SH2D1B
ENSG00000211947.2	1.45012	-0.021033	0.985527	1.42e-07	0.000159378	0.000436361	IGHV3-21
ENSG00000211949.3	1.61676	-0.0206484	0.98579	1.74e-07	0.000180755	0.000436361	IGHV3-23
ENSG00000211966.2	0.642058	-0.0207493	0.985721	6.55e-08	9.17e-05	0.000436361	IGHV5-51
ENSG00000230438.6	3.1309	-0.0112954	0.992201	1.71e-07	0.000178867	0.000436361	SERPINB9P1
ENSG00000154655.15	3.34088	-0.0105645	0.992704	2.07e-07	0.000199438	0.000485237	L3MBTL4
ENSG00000223558.1	-1.63735	-0.012865	0.991122	2.19e-07	0.000205933	0.000485237	TRIM60P17
ENSG00000086548.8	0.407579	0.0246494	1.01723	2.5e-07	0.000223892	0.000646734	CEACAM6
ENSG00000283646.1	0.899526	0.0252322	1.01764	2.28e-07	0.00021087	0.000646734	LINC02009
ENSG00000023909.9	4.52261	0.00710029	1.00493	3.71e-07	0.000296796	0.000920294	GCLM
ENSG00000065618.18	-0.179211	0.0222185	1.01552	3.2e-07	0.000268187	0.000920294	COL17A1
ENSG00000112812.15	-0.969199	0.0145083	1.01011	4.37e-07	0.00033075	0.000920294	PRSS16
ENSG00000122641.10	-0.164313	0.0223688	1.01563	4.15e-07	0.000320118	0.000920294	INHBA
ENSG00000124469.11	1.94736	0.0253375	1.01772	4.03e-07	0.000313782	0.000920294	CEACAM8
ENSG00000152760.9	-0.70753	0.019097	1.01333	3.25e-07	0.000270943	0.000920294	DYNLT5
ENSG00000164402.13	2.67105	0.00935211	1.0065	4.32e-07	0.000328089	0.000920294	SEPTIN8
ENSG00000168917.8	0.140498	0.0204963	1.01431	3.29e-07	0.000273406	0.000920294	SLC35G2
ENSG00000211950.2	-0.795884	-0.0170519	0.98825	4.33e-07	0.00032882	0.000920294	IGHV1-24
ENSG00000278160.1	-2.06719	0.000653583	1.00045	2.56e-07	0.000227634	0.000920294
ENSG00000156738.17	6.60051	-0.0177876	0.987746	4.55e-07	0.000339353	0.00134258	MS4A1
ENSG00000002587.9	0.804877	-0.0179592	0.987629	8.69e-07	0.000532093	0.00141918	HS3ST1
ENSG00000012124.16	4.71485	-0.0183811	0.98734	8.09e-07	0.000508367	0.00141918	CD22
ENSG00000144218.18	5.37622	-0.0158106	0.989101	8.84e-07	0.000537526	0.00141918	AFF3
ENSG00000145911.5	1.63369	-0.0161814	0.988847	6.79e-07	0.000452582	0.00141918	N4BP3
ENSG00000153064.11	5.67415	-0.0150712	0.989608	8.72e-07	0.000532961	0.00141918	BANK1
ENSG00000173391.8	0.338016	0.0246452	1.01723	7.55e-07	0.000485869	0.00141918	OLR1
ENSG00000187912.11	2.7061	-0.0188601	0.987012	6.96e-07	0.000460159	0.00141918	CLEC17A
ENSG00000197520.10	1.51645	-0.0165154	0.988618	7.94e-07	0.000502304	0.00141918	FAM177B
ENSG00000205056.8	3.81298	-0.0204484	0.985926	4.84e-07	0.000355277	0.00141918	LINC02397
ENSG00000211956.2	1.5534	-0.0174751	0.98796	8.19e-07	0.000512289	0.00141918	IGHV4-34
ENSG00000214796.8	-1.72032	0.010308	1.00717	7.06e-07	0.000464804	0.00141918	TUBA5P
ENSG00000229989.3	3.17733	-0.00918955	0.993651	8.22e-07	0.000513625	0.00141918	MIR181A1HG
ENSG00000240012.1	-0.646823	-0.0165992	0.98856	8.52e-07	0.000525442	0.00141918	SLC9A9-AS1
ENSG00000257275.6	1.30342	-0.0250205	0.982807	9.04e-07	0.000545063	0.00141918
ENSG00000211962.2	-0.159995	-0.0184473	0.987295	9.14e-07	0.000548714	0.00185698	IGHV1-46
ENSG00000174807.3	-1.27893	-0.016101	0.988902	9.54e-07	0.000565487	0.0022479	CD248
ENSG00000214140.10	0.281502	-0.0172039	0.988146	1.04e-06	0.000604894	0.0022479	PRCD
ENSG00000234572.1	0.129288	-0.0158738	0.989057	1.08e-06	0.000619037	0.0022479	LINC01800
ENSG00000130413.15	0.376551	-0.0148904	0.989732	1.26e-06	0.000695898	0.00255174	STK33
ENSG00000134242.15	5.88893	0.00752749	1.00523	1.1e-06	0.000627799	0.00255174	PTPN22
ENSG00000184349.12	0.207492	0.0186941	1.01304	1.22e-06	0.000678016	0.00255174	EFNA5
ENSG00000260629.1	-2.04306	0.00308032	1.00214	1.28e-06	0.000701383	0.00255174	BGLT3
ENSG00000081189.15	6.80181	-0.00693607	0.995204	2.39e-06	0.00113613	0.00404398	MEF2C
ENSG00000081377.16	3.96248	0.00884547	1.00615	1.82e-06	0.000927523	0.00404398	CDC14B
ENSG00000125249.6	5.84096	0.00976787	1.00679	2.18e-06	0.0010642	0.00404398	RAP2A
ENSG00000135077.8	5.25876	-0.00709937	0.995091	2.51e-06	0.00117613	0.00404398	HAVCR2
ENSG00000135318.11	2.88527	-0.0172474	0.988116	1.87e-06	0.000946411	0.00404398	NT5E
ENSG00000140391.14	4.88172	-0.00818856	0.99434	2.37e-06	0.0011282	0.00404398	TSPAN3
ENSG00000150093.18	7.94169	0.00704661	1.0049	1.8e-06	0.000920432	0.00404398	ITGB1
ENSG00000164056.10	0.770802	-0.0145128	0.989991	2.47e-06	0.00116275	0.00404398	SPRY1
ENSG00000164821.4	1.96166	0.0280749	1.01965	1.57e-06	0.000827346	0.00404398	DEFA4
ENSG00000170801.9	-1.26338	0.0146315	1.01019	2.3e-06	0.00110681	0.00404398	HTRA3
ENSG00000179088.14	2.91087	-0.011043	0.992375	2.61e-06	0.00120975	0.00404398	C12orf42
ENSG00000211943.2	0.816557	-0.0186421	0.987161	2.14e-06	0.00105013	0.00404398	IGHV3-15
ENSG00000234607.2	-1.96006	0.00581237	1.00404	1.66e-06	0.000863919	0.00404398
ENSG00000255929.5	-1.57856	0.0115855	1.00806	1.58e-06	0.000830834	0.00404398	PIWIL4-AS1
ENSG00000269553.1	0.749639	-0.0176902	0.987813	1.32e-06	0.000718337	0.00404398
ENSG00000078589.12	5.39002	-0.00745968	0.994843	2.83e-06	0.00128465	0.00467223	P2RY10
ENSG00000141622.13	2.28106	-0.0159818	0.988983	3.37e-06	0.00145142	0.00467223	ARK2C
ENSG00000147889.17	1.64326	0.00962455	1.00669	2.99e-06	0.00133552	0.00467223	CDKN2A
ENSG00000157554.18	0.410254	0.017948	1.01252	3.2e-06	0.00140061	0.00467223	ERG
ENSG00000167483.17	5.19966	-0.0160957	0.988905	3.11e-06	0.00137187	0.00467223	NIBAN3
ENSG00000167535.7	1.30689	0.0110013	1.00765	3.18e-06	0.00139393	0.00467223	CACNB3
ENSG00000229474.6	5.72182	0.0101243	1.00704	2.63e-06	0.00121718	0.00467223	PATL2
ENSG00000242399.1	-2.05974	0.00415629	1.00289	3.38e-06	0.00145626	0.00467223	RPS20P23
ENSG00000000971.15	3.10773	0.018242	1.01272	1.04e-05	0.00334968	0.00915833	CFH
ENSG00000007312.12	5.60669	-0.0154822	0.989326	7.41e-06	0.0026763	0.00915833	CD79B
ENSG00000012223.12	4.21844	0.0256528	1.01794	3.92e-06	0.00164294	0.00915833	LTF
ENSG00000074966.10	6.50328	-0.00871824	0.993975	4.44e-06	0.00181512	0.00915833	TXK
ENSG00000077327.15	-0.760778	-0.0151821	0.989532	9.5e-06	0.00316937	0.00915833	SPAG6
ENSG00000101425.12	1.79154	0.0187932	1.01311	7.5e-06	0.00269898	0.00915833	BPI
ENSG00000103528.16	1.84584	-0.0128811	0.991111	8.37e-06	0.00291329	0.00915833	SYT17
ENSG00000103647.12	-0.842011	-0.0168573	0.988383	7.74e-06	0.00275899	0.00915833	CORO2B
ENSG00000114315.3	0.503051	-0.0144304	0.990047	4.07e-06	0.0016938	0.00915833	HES1
ENSG00000116574.5	4.84506	0.00790232	1.00549	9.88e-06	0.00325138	0.00915833	RHOU
ENSG00000122986.13	5.82972	-0.00735124	0.994917	3.79e-06	0.00159616	0.00915833	HVCN1
ENSG00000128218.7	-0.432097	-0.0163522	0.98873	5.71e-06	0.0022106	0.00915833	VPREB3
ENSG00000129757.12	3.91772	-0.0159319	0.989018	9.68e-06	0.00320929	0.00915833	CDKN1C
ENSG00000134755.14	5.40497	0.0162325	1.01132	6.49e-06	0.00243213	0.00915833	DSC2
ENSG00000134986.13	3.06871	-0.00670865	0.995361	7.18e-06	0.0026157	0.00915833	NREP
ENSG00000137101.12	3.24581	-0.0135681	0.990639	1.01e-05	0.00330712	0.00915833	CD72
ENSG00000139174.11	2.6896	-0.0110472	0.992372	7.32e-06	0.0026519	0.00915833	PRICKLE1
ENSG00000144407.9	0.972607	0.0112748	1.00785	5.32e-06	0.00209406	0.00915833	PTH2R
ENSG00000149970.14	3.11746	-0.0102781	0.992901	8.88e-06	0.00303157	0.00915833	CNKSR2
ENSG00000151320.10	2.98311	-0.0158247	0.989091	8.07e-06	0.00284132	0.00915833	AKAP6
ENSG00000164047.4	3.72193	0.0205478	1.01434	5.29e-06	0.00208455	0.00915833	CAMP
ENSG00000164070.11	-0.995168	0.0137139	1.00955	9.48e-06	0.00316417	0.00915833	HSPA4L
ENSG00000166428.12	3.23664	-0.0130067	0.991025	5.95e-06	0.00228095	0.00915833	PLD4
ENSG00000177455.12	2.909	-0.0173275	0.988061	6.91e-06	0.00254442	0.00915833	CD19
ENSG00000197353.3	0.0107042	-0.0185978	0.987192	9.74e-06	0.00322192	0.00915833	LYPD2
ENSG00000197705.9	2.41465	-0.0177393	0.987779	7.51e-06	0.00270217	0.00915833	KLHL14
ENSG00000234614.1	2.19904	0.0108592	1.00756	6.69e-06	0.00248726	0.00915833	C2CD4D-AS1
ENSG00000236283.4	-0.305529	-0.0165441	0.988598	3.44e-06	0.00147311	0.00915833
ENSG00000245694.9	-1.47509	0.0122563	1.00853	4.94e-06	0.00197706	0.00915833	CRNDE
ENSG00000253924.1	0.927341	-0.0174522	0.987976	4.91e-06	0.00196664	0.00915833
ENSG00000254394.1	-2.06501	0.0015349	1.00106	5.66e-06	0.00219494	0.00915833
ENSG00000254709.7	1.18636	-0.0210705	0.985501	1e-05	0.00327584	0.00915833	IGLL5
ENSG00000260103.2	-0.636188	-0.0123084	0.991505	8.98e-06	0.0030543	0.00915833
ENSG00000269951.1	0.647882	-0.011997	0.991719	9.49e-06	0.00316798	0.00915833
ENSG00000279795.1	-2.06803	-0.000434051	0.999699	1e-05	0.00327877	0.00915833
ENSG00000095585.16	3.19229	-0.0125393	0.991346	1.2e-05	0.00368114	0.00937212	BLNK
ENSG00000152990.13	1.88768	-0.0130476	0.990997	1.27e-05	0.00380374	0.00937212	ADGRA3
ENSG00000168528.11	-0.0714376	0.0166747	1.01163	1.27e-05	0.00380672	0.00937212	SERINC2
ENSG00000171291.8	4.40735	-0.00823085	0.994311	1.04e-05	0.00335411	0.00937212	ZNF439
ENSG00000172071.11	5.50399	-0.00534659	0.996301	1.2e-05	0.00367811	0.00937212	EIF2AK3
ENSG00000172232.9	0.232375	0.0182748	1.01275	1.25e-05	0.00376763	0.00937212	AZU1
ENSG00000183960.8	2.12526	-0.0180619	0.987559	1.28e-05	0.00381232	0.00937212	KCNH8
ENSG00000184226.14	5.17808	-0.0192863	0.986721	1.17e-05	0.00361495	0.00937212	PCDH9
ENSG00000189233.11	3.1937	0.0134379	1.00936	1.3e-05	0.00384757	0.00937212	NUGGC
ENSG00000235531.9	1.81004	0.0146269	1.01019	1.15e-05	0.00358803	0.00937212	MSC-AS1
ENSG00000244676.5	-1.39609	0.0112041	1.0078	1.21e-05	0.00368516	0.00937212
ENSG00000245812.2	-1.06508	-0.0134237	0.990739	1.11e-05	0.00349991	0.00937212	LINC02202
ENSG00000270550.1	0.656075	-0.0183705	0.987347	1.2e-05	0.00367663	0.00937212	IGHV3-30

## Sheet: c.PhenoAge
Table S1c. Differentially Expressed Genes for the PhenoAge Clock at FDR<.01
Ensemble Name	base mean	coefficient (log2)	coefficient (natural)	pvalue	qval	FDR-adjustedP	Gene Symbol
ENSG00000154217.14	6.10651	-0.00496997	0.996561	1.03968e-16	4.35038e-12	3.1182e-11	PITPNC1
ENSG00000011201.11	-1.21557	0.0211005	1.01473	8.49176e-16	1.77662e-11	5.89399e-11	ANOS1
ENSG00000118113.11	2.5119	0.0347696	1.02439	7.03649e-15	6.92488e-11	1.59739e-10	MMP8
ENSG00000257017.8	1.43418	0.0274525	1.01921	2.25776e-15	3.14908e-11	1.59739e-10	HP
ENSG00000150337.13	3.6716	0.0218568	1.01527	9.89287e-15	8.27902e-11	4.75111e-09	FCGR1A
ENSG00000077684.15	6.67644	-0.00403267	0.997209	1.60848e-12	7.61808e-09	2.19202e-08	JADE1
ENSG00000163754.17	5.05183	0.00759825	1.00528	7.68211e-13	4.4455e-09	2.19202e-08	GYG1
ENSG00000198805.11	6.4382	0.0107255	1.00746	1.90981e-12	8.49234e-09	2.19202e-08	PNP
ENSG00000265531.3	1.03684	0.0238965	1.0167	1.23438e-13	8.60843e-10	2.19202e-08	FCGR1CP
ENSG00000134755.14	5.42654	0.0183921	1.01283	4.7257e-12	1.76801e-08	8.85726e-08	DSC2
ENSG00000155380.11	3.76965	0.00699416	1.00486	2.21889e-12	9.2846e-09	8.85726e-08	SLC16A1
ENSG00000173391.8	0.368238	0.0249586	1.01745	1.25142e-11	3.52291e-08	8.85726e-08	OLR1
ENSG00000187554.11	5.15093	0.0123917	1.00863	9.81964e-12	3.02329e-08	8.85726e-08	TLR5
ENSG00000283646.1	0.929706	0.0246586	1.01724	8.05483e-12	2.64201e-08	8.85726e-08	LINC02009
ENSG00000122420.9	-0.665156	0.023966	1.01675	1.28027e-11	3.57139e-08	9.62861e-08	PTGFR
ENSG00000130513.6	-1.61435	0.0133798	1.00932	2.05335e-11	4.67979e-08	9.62861e-08	GDF15
ENSG00000143771.11	5.47741	0.00583559	1.00405	2.62668e-11	5.27114e-08	9.62861e-08	CNIH4
ENSG00000148175.12	7.85042	0.0121173	1.00843	2.04439e-11	4.66927e-08	9.62861e-08	STOM
ENSG00000198019.12	3.89939	0.0167146	1.01165	1.75015e-11	4.29716e-08	9.62861e-08	FCGR1BP
ENSG00000206199.10	1.68272	-0.0158892	0.989047	2.36736e-11	5.02217e-08	9.62861e-08	ANKUB1
ENSG00000091436.16	5.08462	0.00874935	1.00608	2.66094e-11	5.30203e-08	2.06543e-07	MAP3K20
ENSG00000120217.13	4.3441	0.0148583	1.01035	4.32078e-11	7.42103e-08	2.06543e-07	CD274
ENSG00000144290.16	2.43048	-0.026234	0.98198	3.23289e-11	6.10482e-08	2.06543e-07	SLC4A10
ENSG00000164430.15	4.72508	0.00548358	1.00381	4.15523e-11	7.23631e-08	2.06543e-07	CGAS
ENSG00000029153.14	1.12356	0.0128898	1.00897	4.63538e-11	7.7584e-08	5.0931e-07	BMAL2
ENSG00000091129.19	0.372663	-0.0234112	0.983904	1.0348e-10	1.50454e-07	6.76828e-07	NRCAM
ENSG00000138772.12	5.11505	0.0174256	1.01215	1.08919e-10	1.56533e-07	6.76828e-07	ANXA3
ENSG00000179869.14	3.90087	0.0240293	1.0168	9.54627e-11	1.4123e-07	6.76828e-07	ABCA13
ENSG00000198829.6	1.14731	0.0155637	1.01085	5.85257e-11	9.41888e-08	6.76828e-07	SUCNR1
ENSG00000012223.12	4.25031	0.026455	1.01851	1.23227e-10	1.71874e-07	2.09331e-06	LTF
ENSG00000023909.9	4.53069	0.00644955	1.00448	4.41212e-10	5.07803e-07	2.09331e-06	GCLM
ENSG00000092200.12	3.50919	-0.0119918	0.991722	3.19625e-10	3.94218e-07	2.09331e-06	RPGRIP1
ENSG00000122966.15	1.7244	0.00962039	1.00669	4.73237e-10	5.35236e-07	2.09331e-06	CIT
ENSG00000145555.14	1.12959	0.0158238	1.01103	3.28364e-10	4.02922e-07	2.09331e-06	MYO10
ENSG00000183019.7	1.29252	0.0160901	1.01122	1.98171e-10	2.63258e-07	2.09331e-06	MCEMP1
ENSG00000255007.1	-2.01537	0.00474093	1.00329	3.26338e-10	4.00913e-07	2.09331e-06	LINC02489
ENSG00000157168.18	3.03843	0.021792	1.01522	4.73418e-10	5.35389e-07	2.3382e-06	NRG1
ENSG00000147324.10	5.53413	0.00771691	1.00536	5.29298e-10	5.82831e-07	3.1456e-06	MFHAS1
ENSG00000074966.10	6.49287	-0.00850099	0.994125	1.46462e-09	1.2527e-06	3.62747e-06	TXK
ENSG00000122641.10	-0.139289	0.019831	1.01384	1.34546e-09	1.18405e-06	3.62747e-06	INHBA
ENSG00000145685.13	4.73019	0.00996691	1.00693	1.43171e-09	1.23413e-06	3.62747e-06	LHFPL2
ENSG00000164047.4	3.747	0.0206647	1.01443	6.04473e-10	6.48543e-07	3.62747e-06	CAMP
ENSG00000165949.12	2.6689	0.0343055	1.02406	9.76307e-10	9.437e-07	3.62747e-06	IFI27
ENSG00000172331.11	7.43662	0.0184291	1.01286	1.15816e-09	1.06774e-06	3.62747e-06	BPGM
ENSG00000197646.7	0.537218	0.0165617	1.01155	1.21722e-09	1.10559e-06	3.62747e-06	PDCD1LG2
ENSG00000198574.5	3.93444	-0.0136515	0.990582	1.2342e-09	1.11627e-06	3.62747e-06	SH2D1B
ENSG00000225492.6	0.631252	0.0203167	1.01418	9.53892e-10	9.27573e-07	3.62747e-06	GBP1P1
ENSG00000279320.1	2.69461	0.0131793	1.00918	9.23975e-10	9.05746e-07	3.62747e-06
ENSG00000096006.11	1.88048	0.0224788	1.0157	1.92757e-09	1.53493e-06	5.38134e-06	CRISP3
ENSG00000108950.11	0.787452	0.0186535	1.01301	2.29661e-09	1.7341e-06	5.38134e-06	FAM20A
ENSG00000151136.14	4.35594	-0.00874862	0.993954	2.25605e-09	1.71322e-06	5.38134e-06	ABTB3
ENSG00000162687.16	-1.59127	0.0129404	1.00901	2.12743e-09	1.64541e-06	5.38134e-06	KCNT2
ENSG00000196781.14	3.34231	-0.00993897	0.993135	1.97599e-09	1.56229e-06	5.38134e-06	TLE1
ENSG00000198964.13	6.12142	0.00329563	1.00229	1.73198e-09	1.42029e-06	5.38134e-06	SGMS1
ENSG00000255221.3	1.96422	0.0152017	1.01059	1.47139e-09	1.25649e-06	5.38134e-06	CARD17P
ENSG00000065618.18	-0.154989	0.0189553	1.01323	3.8912e-09	2.66191e-06	1.23062e-05	COL17A1
ENSG00000101425.12	1.81407	0.018429	1.01286	2.92949e-09	2.11721e-06	1.23062e-05	BPI
ENSG00000152766.5	1.70448	0.0188733	1.01317	2.37164e-09	1.77209e-06	1.23062e-05	ANKRD22
ENSG00000164070.11	-0.978632	0.0135576	1.00944	3.28011e-09	2.32278e-06	1.23062e-05	HSPA4L
ENSG00000167664.8	2.44418	-0.0147047	0.989859	3.70182e-09	2.55931e-06	1.23062e-05	TMIGD2
ENSG00000258819.1	4.22909	-0.0171826	0.988161	3.68565e-09	2.55044e-06	1.23062e-05	LINC02289
ENSG00000072657.8	-0.47732	0.0165714	1.01155	4.13624e-09	2.79152e-06	1.29982e-05	TRHDE
ENSG00000078589.12	5.38148	-0.00684115	0.995269	6.58235e-09	3.94175e-06	1.29982e-05	P2RY10
ENSG00000121413.12	4.51341	-0.00939467	0.993509	5.74793e-09	3.57968e-06	1.29982e-05	ZSCAN18
ENSG00000140948.11	4.38656	-0.00491783	0.996597	7.01503e-09	4.11875e-06	1.29982e-05	ZCCHC14
ENSG00000143457.10	4.47358	0.00427509	1.00297	5.05384e-09	3.25569e-06	1.29982e-05	GOLPH3L
ENSG00000147883.10	2.22335	0.0101574	1.00707	4.62078e-09	3.042e-06	1.29982e-05	CDKN2B
ENSG00000162496.8	3.86307	-0.00821574	0.994321	6.61484e-09	3.95529e-06	1.29982e-05	DHRS3
ENSG00000204852.15	3.85172	-0.00817308	0.994351	6.23314e-09	3.79366e-06	1.29982e-05	TCTN1
ENSG00000223725.6	1.78474	-0.0112246	0.99225	5.43407e-09	3.43589e-06	1.29982e-05
ENSG00000231160.9	2.2878	-0.00982957	0.99321	6.6335e-09	3.96304e-06	1.29982e-05	KLF3-AS1
ENSG00000079215.13	0.779032	0.0129854	1.00904	1.10508e-08	5.94387e-06	2.74976e-05	SLC1A3
ENSG00000116199.11	5.98456	0.00664848	1.00462	1.07527e-08	5.81743e-06	2.74976e-05	FAM20B
ENSG00000124469.11	1.97481	0.0214201	1.01496	7.24264e-09	4.20911e-06	2.74976e-05	CEACAM8
ENSG00000145354.9	4.98894	0.0130288	1.00907	9.93911e-09	5.46476e-06	2.74976e-05	CISD2
ENSG00000155307.17	5.55903	0.0070832	1.00492	9.08033e-09	5.07981e-06	2.74976e-05	SAMSN1
ENSG00000197006.13	7.16628	0.0077049	1.00535	1.1276e-08	6.03838e-06	2.74976e-05	METTL9
ENSG00000272602.5	3.20041	-0.0118553	0.991816	1.10367e-08	5.93791e-06	2.74976e-05	ZNF595
ENSG00000001084.10	5.47208	0.00874135	1.00608	3.01909e-08	1.31868e-05	4.57008e-05	GCLC
ENSG00000072274.12	6.97638	0.00871834	1.00606	2.14619e-08	1.02274e-05	4.57008e-05	TFRC
ENSG00000085563.14	4.39893	-0.00910694	0.993707	1.31552e-08	6.86341e-06	4.57008e-05	ABCB1
ENSG00000100387.8	5.15856	0.00667683	1.00464	1.98965e-08	9.63873e-06	4.57008e-05	RBX1
ENSG00000108984.13	5.11459	0.00573464	1.00398	2.52455e-08	1.15738e-05	4.57008e-05	MAP2K6
ENSG00000111666.10	6.38329	0.0101765	1.00708	1.57416e-08	7.97727e-06	4.57008e-05	CHPT1
ENSG00000111912.19	5.80899	0.00396588	1.00275	2.64046e-08	1.1966e-05	4.57008e-05	NCOA7
ENSG00000117450.13	5.92393	0.00521121	1.00362	2.05625e-08	9.89155e-06	4.57008e-05	PRDX1
ENSG00000145365.10	4.75207	0.00704873	1.0049	2.13258e-08	1.0177e-05	4.57008e-05	TIFA
ENSG00000148346.11	2.36871	0.0177347	1.01237	2.51958e-08	1.15568e-05	4.57008e-05	LCN2
ENSG00000152990.13	1.87236	-0.0124218	0.991427	1.97304e-08	9.57514e-06	4.57008e-05	ADGRA3
ENSG00000171208.9	2.44769	0.0074197	1.00516	1.18427e-08	6.27265e-06	4.57008e-05	NETO2
ENSG00000172716.16	6.48542	0.00455065	1.00316	2.73671e-08	1.2285e-05	4.57008e-05	SLFN11
ENSG00000196159.11	2.27974	-0.0151508	0.989553	2.9423e-08	1.29464e-05	4.57008e-05	FAT4
ENSG00000225483.1	-2.02353	0.00447091	1.0031	2.17461e-08	1.03322e-05	4.57008e-05	RPL22P4
ENSG00000225885.6	-0.400815	-0.0131248	0.990944	1.61725e-08	8.15666e-06	4.57008e-05
ENSG00000254420.1	-1.65653	0.00979829	1.00681	2.71868e-08	1.22257e-05	4.57008e-05
ENSG00000112335.14	7.45231	0.0108113	1.00752	3.04099e-08	1.32547e-05	6.71586e-05	SNX3
ENSG00000169877.9	5.26593	0.0204953	1.01431	3.44397e-08	1.46286e-05	6.71586e-05	AHSP
ENSG00000176293.19	1.53028	-0.0133185	0.990811	3.46423e-08	1.46958e-05	6.71586e-05	ZNF135
ENSG00000136810.12	4.68582	0.00898157	1.00624	4.01607e-08	1.65108e-05	7.4309e-05	TXN
ENSG00000163251.3	2.47216	0.0105108	1.00731	4.44887e-08	1.78624e-05	7.4309e-05	FZD5
ENSG00000166848.5	6.73005	0.00598583	1.00416	3.52249e-08	1.48882e-05	7.4309e-05	TERF2IP
ENSG00000173914.11	4.00286	-0.00360425	0.997505	4.8863e-08	1.91657e-05	7.4309e-05	RBM4B
ENSG00000183625.14	5.31782	-0.0131018	0.99096	4.94765e-08	1.93437e-05	7.4309e-05	CCR3
ENSG00000188313.12	6.48824	0.0112663	1.00784	4.56973e-08	1.82286e-05	7.4309e-05	PLSCR1
ENSG00000197353.3	-0.0106033	-0.0170766	0.988233	4.12216e-08	1.68481e-05	7.4309e-05	LYPD2
ENSG00000204010.3	5.63939	0.0180073	1.01256	4.60749e-08	1.83421e-05	7.4309e-05	IFIT1B
ENSG00000228526.6	-0.769111	0.011813	1.00822	5.01362e-08	1.95338e-05	7.4309e-05	MIR34AHG
ENSG00000122741.15	6.27514	0.00425875	1.00296	5.12079e-08	1.98399e-05	8.08569e-05	DCAF10
ENSG00000112053.13	3.19625	0.0144709	1.01008	6.19692e-08	2.29337e-05	9.0878e-05	SLC26A8
ENSG00000116717.11	2.82741	0.00889102	1.00618	6.0127e-08	2.24201e-05	9.0878e-05	GADD45A
ENSG00000134333.13	6.5048	0.00423136	1.00294	5.31403e-08	2.03997e-05	9.0878e-05	LDHA
ENSG00000146007.10	6.47814	0.00886067	1.00616	6.45524e-08	2.3641e-05	9.0878e-05	ZMAT2
ENSG00000185112.5	3.70402	-0.00764084	0.994718	5.84735e-08	2.19525e-05	9.0878e-05	FAM43A
ENSG00000278897.1	3.4953	-0.0076027	0.994744	5.69674e-08	2.15209e-05	9.0878e-05
ENSG00000051341.13	2.34507	0.0091108	1.00634	9.02172e-08	3.05351e-05	0.000116617	POLQ
ENSG00000111726.12	3.90512	0.00759743	1.00528	8.7206e-08	2.97762e-05	0.000116617	CMAS
ENSG00000132357.13	4.36239	0.00657936	1.00457	9.41918e-08	3.15168e-05	0.000116617	CARD6
ENSG00000148143.12	-0.318352	0.0138177	1.00962	1.05352e-07	3.41573e-05	0.000116617	ZNF462
ENSG00000158089.14	2.53149	0.0152868	1.01065	1.05729e-07	3.42437e-05	0.000116617	GALNT14
ENSG00000163171.7	7.58822	0.00581145	1.00404	1.05915e-07	3.42862e-05	0.000116617	CDC42EP3
ENSG00000163520.13	0.346995	-0.0151427	0.989559	8.54726e-08	2.93332e-05	0.000116617	FBLN2
ENSG00000163568.14	3.80659	0.0105155	1.00732	7.03749e-08	2.52748e-05	0.000116617	AIM2
ENSG00000163710.7	-1.22884	0.013823	1.00963	1.04272e-07	3.3909e-05	0.000116617	PCOLCE2
ENSG00000165490.12	2.87929	0.00752645	1.00523	9.05736e-08	3.06241e-05	0.000116617	DDIAS
ENSG00000170801.9	-1.24751	0.0123874	1.00862	6.61714e-08	2.40768e-05	0.000116617	HTRA3
ENSG00000173598.13	5.8329	0.00841283	1.00585	7.25875e-08	2.5893e-05	0.000116617	NUDT4
ENSG00000183691.4	1.57832	-0.0192714	0.986731	8.86767e-08	3.01485e-05	0.000116617	NOG
ENSG00000227502.2	-1.31008	0.0122936	1.00856	1.02395e-07	3.34738e-05	0.000116617	MROCKI
ENSG00000249437.7	5.8128	0.0124361	1.00866	9.14372e-08	3.08388e-05	0.000116617	NAIP
ENSG00000034053.14	5.29499	-0.00893562	0.993825	1.35362e-07	4.14926e-05	0.000176123	APBA2
ENSG00000113368.11	5.78213	0.008803	1.00612	1.16065e-07	3.68139e-05	0.000176123	LMNB1
ENSG00000127903.13	1.34248	-0.0118087	0.991848	1.2108e-07	3.80607e-05	0.000176123	ZNF835
ENSG00000132912.12	6.44745	0.00375479	1.00261	1.32864e-07	4.09048e-05	0.000176123	DCTN4
ENSG00000151012.13	1.90935	0.0107947	1.00751	1.07976e-07	3.47546e-05	0.000176123	SLC7A11
ENSG00000159461.14	6.97313	0.00750972	1.00522	1.23567e-07	3.86709e-05	0.000176123	AMFR
ENSG00000179104.8	4.81472	0.00550807	1.00383	1.25019e-07	3.90246e-05	0.000176123	TMTC2
ENSG00000006125.17	7.82274	0.00555408	1.00386	2.48716e-07	6.84883e-05	0.000311357	AP2B1
ENSG00000088986.10	5.39916	0.00470632	1.00327	3.85216e-07	9.46497e-05	0.000311357	DYNLL1
ENSG00000100336.17	0.0832576	0.0152787	1.01065	3.99204e-07	9.70158e-05	0.000311357	APOL4
ENSG00000106804.7	3.29204	0.00669796	1.00465	2.71537e-07	7.32932e-05	0.000311357	C5
ENSG00000110723.11	2.23719	-0.00928169	0.993587	3.14948e-07	8.19276e-05	0.000311357	EXPH5
ENSG00000112394.16	2.87745	-0.0115105	0.992053	2.90142e-07	7.70719e-05	0.000311357	SLC16A10
ENSG00000113319.12	5.52263	-0.00784848	0.994575	1.95313e-07	5.64491e-05	0.000311357	RASGRF2
ENSG00000125249.6	5.85111	0.00774141	1.00538	4.06153e-07	9.81721e-05	0.000311357	RAP2A
ENSG00000127328.21	4.82366	0.00534165	1.00371	1.6218e-07	4.83603e-05	0.000311357	RAB3IP
ENSG00000132964.11	4.05818	0.00486781	1.00338	4.2341e-07	0.00010099	0.000311357	CDK8
ENSG00000134827.7	2.70376	0.0150642	1.0105	2.42937e-07	6.72407e-05	0.000311357	TCN1
ENSG00000134909.18	3.84037	-0.00634352	0.995613	2.74953e-07	7.39962e-05	0.000311357	ARHGAP32
ENSG00000135218.17	7.62235	0.00793855	1.00552	1.3744e-07	4.19778e-05	0.000311357	CD36
ENSG00000135525.18	2.07532	-0.00959422	0.993372	2.39259e-07	6.644e-05	0.000311357	MAP7
ENSG00000135960.9	2.11001	-0.0147443	0.989832	1.88264e-07	5.47701e-05	0.000311357	EDAR
ENSG00000137210.13	4.33835	0.00428976	1.00298	3.49101e-07	8.82924e-05	0.000311357	TMEM14B
ENSG00000137460.8	1.8371	0.0111877	1.00778	2.40364e-07	6.6681e-05	0.000311357	FHDC1
ENSG00000146250.6	-1.28778	-0.012757	0.991196	3.9853e-07	9.6903e-05	0.000311357	PRSS35
ENSG00000152270.8	7.73247	-0.00526154	0.99636	2.39826e-07	6.65637e-05	0.000311357	PDE3B
ENSG00000155962.12	3.53899	0.0112006	1.00779	3.69819e-07	9.19842e-05	0.000311357	CLIC2
ENSG00000157554.18	0.429102	0.01447	1.01008	3.99988e-07	9.71468e-05	0.000311357	ERG
ENSG00000158006.13	5.03299	-0.00460939	0.99681	4.14284e-07	9.95092e-05	0.000311357	PAFAH2
ENSG00000161381.13	2.87679	-0.00995173	0.993126	3.99434e-07	9.70541e-05	0.000311357	PLXDC1
ENSG00000163221.8	5.97148	0.0127793	1.0089	3.25608e-07	8.39529e-05	0.000311357	S100A12
ENSG00000163565.18	7.88417	0.00596593	1.00414	2.95169e-07	7.80725e-05	0.000311357	IFI16
ENSG00000168528.11	-0.0531568	0.0143453	1.00999	3.97512e-07	9.67324e-05	0.000311357	SERINC2
ENSG00000173480.10	5.38697	-0.00304353	0.997893	1.70934e-07	5.05469e-05	0.000311357	ZNF417
ENSG00000176533.12	3.01429	-0.0089792	0.993795	3.56312e-07	8.95913e-05	0.000311357	GNG7
ENSG00000185880.12	6.13336	0.00513461	1.00357	2.47182e-07	6.81585e-05	0.000311357	TRIM69
ENSG00000186417.13	-1.47896	0.0106695	1.00742	2.37973e-07	6.61588e-05	0.000311357	GLDN
ENSG00000187824.8	0.999207	-0.0100388	0.993066	2.97354e-07	7.85048e-05	0.000311357	TMEM220
ENSG00000198734.10	6.30045	0.00899851	1.00626	1.83183e-07	5.35461e-05	0.000311357	F5
ENSG00000228956.8	4.96437	-0.00806536	0.994425	2.74944e-07	7.39944e-05	0.000311357	SATB1-AS1
ENSG00000232229.5	1.6309	-0.0101021	0.993022	4.30408e-07	0.000102112	0.000311357	LINC00865
ENSG00000236333.3	-0.440285	0.0154383	1.01076	3.28582e-07	8.45116e-05	0.000311357	TRHDE-AS1
ENSG00000240225.10	3.36938	-0.0070743	0.995108	2.78023e-07	7.46243e-05	0.000311357	ZNF542P
ENSG00000240498.6	0.415872	0.00975796	1.00679	2.26e-07	6.3509e-05	0.000311357	CDKN2B-AS1
ENSG00000253250.2	1.04201	0.0102235	1.00711	3.19593e-07	8.28145e-05	0.000311357	C8orf88
ENSG00000261115.5	-0.426019	0.0134507	1.00937	1.9582e-07	5.65689e-05	0.000311357	TMEM178B
ENSG00000274588.1	2.1837	-0.0172868	0.988089	4.10599e-07	9.89054e-05	0.000311357	DGKK
ENSG00000065911.11	4.99414	0.00521682	1.00362	5.78248e-07	0.000128115	0.000522962	MTHFD2
ENSG00000120306.9	4.6427	0.0102202	1.00711	5.78871e-07	0.000128219	0.000522962	CYSTM1
ENSG00000134627.11	2.84284	0.00628782	1.00437	5.25836e-07	0.000119149	0.000522962	PIWIL4
ENSG00000135776.4	5.96792	0.00701626	1.00488	4.9887e-07	0.000114375	0.000522962	ABCB10
ENSG00000149218.4	5.99177	0.00736614	1.00512	4.42521e-07	0.000104026	0.000522962	ENDOD1
ENSG00000163827.12	0.092772	0.014515	1.01011	5.62621e-07	0.000125484	0.000522962	LRRC2
ENSG00000170949.17	6.12014	-0.0031918	0.99779	5.38279e-07	0.000121314	0.000522962	ZNF160
ENSG00000171606.17	6.09264	-0.0032676	0.997738	5.11269e-07	0.000116584	0.000522962	ZNF274
ENSG00000183762.12	4.72364	0.0153076	1.01067	4.70289e-07	0.00010919	0.000522962	KREMEN1
ENSG00000198087.7	5.31292	0.00630578	1.00438	5.66472e-07	0.000126135	0.000522962	CD2AP
ENSG00000253115.1	-0.751925	0.0112096	1.0078	5.3663e-07	0.000121028	0.000522962
ENSG00000049759.17	3.82818	0.00953194	1.00663	6.0827e-07	0.000133127	0.000540977	NEDD4L
ENSG00000154734.14	3.19963	-0.0120816	0.991661	6.00269e-07	0.000131802	0.000540977	ADAMTS1
ENSG00000163082.9	0.321997	0.0106921	1.00744	5.8e-07	0.000128408	0.000540977	SGPP2
ENSG00000085491.15	5.7854	0.00457128	1.00317	6.18786e-07	0.000134855	0.00065049	SLC25A24
ENSG00000108861.8	5.786	0.00563175	1.00391	6.77891e-07	0.000144867	0.00065049	DUSP3
ENSG00000196581.10	0.930109	-0.0146112	0.989923	6.39685e-07	0.00013844	0.00065049	AJAP1
ENSG00000250722.5	-0.00708158	0.0114471	1.00797	6.66828e-07	0.000143023	0.00065049	SELENOP
ENSG00000088325.15	1.80235	0.00992208	1.0069	7.43141e-07	0.000156261	0.000868103	TPX2
ENSG00000107281.9	2.18575	0.0128829	1.00897	7.88826e-07	0.000164052	0.000868103	NPDC1
ENSG00000141622.13	2.26454	-0.012575	0.991322	8.00643e-07	0.00016604	0.000868103	ARK2C
ENSG00000163687.13	0.0665626	-0.0115219	0.992045	7.45008e-07	0.000156583	0.000868103	DNASE1L3
ENSG00000164611.12	2.13576	0.00775215	1.00539	7.14776e-07	0.000151337	0.000868103	PTTG1
ENSG00000253276.2	4.92265	0.00632051	1.00439	6.8097e-07	0.000145378	0.000868103	CCDC71L
ENSG00000011426.10	1.5044	0.00994739	1.00692	9.38738e-07	0.000188668	0.00090012	ANLN
ENSG00000072840.12	1.08943	0.0113069	1.00787	1.21061e-06	0.000229385	0.00090012	EVC
ENSG00000076043.9	4.35849	0.00541184	1.00376	9.3402e-07	0.000187918	0.00090012	REXO2
ENSG00000100568.10	6.80227	0.00610697	1.00424	1.06559e-06	0.000208263	0.00090012	VTI1B
ENSG00000104219.12	6.79064	0.00613911	1.00426	1.25026e-06	0.000234937	0.00090012	ZDHHC2
ENSG00000104626.14	4.63642	0.00426455	1.00296	1.14613e-06	0.000220155	0.00090012	ERI1
ENSG00000124107.5	2.9441	0.015005	1.01045	1.08907e-06	0.000211773	0.00090012	SLPI
ENSG00000124490.13	-1.15028	0.013143	1.00915	8.70925e-07	0.00017773	0.00090012	CRISP2
ENSG00000132386.10	1.68911	-0.0102684	0.992908	1.08345e-06	0.000210937	0.00090012	SERPINF1
ENSG00000133069.15	4.95247	0.0154229	1.01075	1.22446e-06	0.000231334	0.00090012	TMCC2
ENSG00000143545.8	0.473088	0.0100989	1.00702	1.11864e-06	0.000216142	0.00090012	RAB13
ENSG00000147889.17	1.65312	0.00746125	1.00519	1.02037e-06	0.000201404	0.00090012	CDKN2A
ENSG00000150045.11	4.80697	-0.0113199	0.992184	9.60548e-07	0.000192116	0.00090012	KLRF1
ENSG00000156381.8	3.98656	0.015307	1.01067	1.05153e-06	0.000206145	0.00090012	ANKRD9
ENSG00000164379.6	-1.8011	0.00846072	1.00588	9.68401e-07	0.000193349	0.00090012	FOXQ1
ENSG00000166510.13	-0.710275	0.0141066	1.00983	1.00543e-06	0.000199107	0.00090012	CCDC68
ENSG00000198216.10	3.60358	0.0127255	1.00886	1.1297e-06	0.000217763	0.00090012	CACNA1E
ENSG00000223609.7	-1.5554	0.0134377	1.00936	1.10629e-06	0.000214325	0.00090012	HBD
ENSG00000224020.1	0.783191	-0.0116082	0.991986	1.22349e-06	0.000231198	0.00090012	MIR181A2HG
ENSG00000271447.5	0.0137135	-0.0135532	0.99065	1.24613e-06	0.000234363	0.00090012	MMP28
ENSG00000003096.14	0.206	-0.00952012	0.993423	1.81643e-06	0.000307553	0.000969748	KLHL13
ENSG00000008952.16	7.05639	0.00761359	1.00529	1.41286e-06	0.000257355	0.000969748	SEC62
ENSG00000085832.16	7.6638	0.00254425	1.00177	1.78673e-06	0.0003041	0.000969748	EPS15
ENSG00000104447.12	6.66139	0.00357951	1.00248	1.79254e-06	0.000304779	0.000969748	TRPS1
ENSG00000112062.10	8.84134	0.00606728	1.00421	1.73531e-06	0.000298039	0.000969748	MAPK14
ENSG00000112077.15	2.44653	0.0130117	1.00906	1.59655e-06	0.000281116	0.000969748	RHAG
ENSG00000112182.14	5.7715	-0.00860175	0.994055	1.78474e-06	0.000303868	0.000969748	BACH2
ENSG00000120265.16	5.57205	0.00470908	1.00327	1.31519e-06	0.000244042	0.000969748	PCMT1
ENSG00000121417.13	5.25644	-0.00310811	0.997848	1.71665e-06	0.000295811	0.000969748	ZNF211
ENSG00000136048.13	4.3324	0.00586472	1.00407	1.5873e-06	0.000279957	0.000969748	DRAM1
ENSG00000138496.16	7.56143	0.0082091	1.00571	1.76333e-06	0.000301355	0.000969748	PARP9
ENSG00000143162.7	6.62963	0.0095973	1.00667	1.82311e-06	0.000308324	0.000969748	CREG1
ENSG00000143889.15	5.96753	0.00468107	1.00325	1.39157e-06	0.000254495	0.000969748	HNRNPLL
ENSG00000147689.16	-0.749391	0.0178507	1.01245	1.47845e-06	0.000266024	0.000969748	FAM83A
ENSG00000152332.15	8.35021	0.00352389	1.00245	1.25719e-06	0.000235898	0.000969748	UHMK1
ENSG00000154027.18	3.57597	-0.0121324	0.991626	1.57312e-06	0.000278173	0.000969748	AK5
ENSG00000162434.11	9.42417	-0.00433627	0.996999	1.59601e-06	0.000281048	0.000969748	JAK1
ENSG00000162949.16	-1.03175	0.0115547	1.00804	1.79274e-06	0.000304802	0.000969748	CAPN13
ENSG00000163634.11	3.60846	0.0059326	1.00412	1.51961e-06	0.000271359	0.000969748	THOC7
ENSG00000166428.12	3.22316	-0.0102746	0.992903	1.37968e-06	0.000252887	0.000969748	PLD4
ENSG00000173436.13	3.77689	-0.00352379	0.99756	1.36952e-06	0.000251507	0.000969748	MICOS10
ENSG00000174482.10	1.05043	-0.015322	0.989436	1.73899e-06	0.000298476	0.000969748	LINGO2
ENSG00000179978.11	3.03343	0.00938722	1.00653	1.37844e-06	0.000252719	0.000969748	NAIPP2
ENSG00000182489.8	1.3103	-0.0125048	0.99137	1.65185e-06	0.000287961	0.000969748	XKRX
ENSG00000265354.3	4.35778	0.00425547	1.00295	1.66859e-06	0.000290006	0.000969748	TIMM23
ENSG00000008394.12	2.92472	0.00746361	1.00519	2.00729e-06	0.000330291	0.00113443	MGST1
ENSG00000028839.9	5.11481	0.00459104	1.00319	1.90029e-06	0.000317614	0.00113443	TBPL1
ENSG00000082014.16	4.05949	0.00776946	1.0054	1.92612e-06	0.00032071	0.00113443	SMARCD3
ENSG00000096063.15	6.69336	0.00654409	1.00455	1.83659e-06	0.000309875	0.00113443	SRPK1
ENSG00000118777.10	2.78907	0.0131412	1.00915	2.06507e-06	0.000336974	0.00113443	ABCG2
ENSG00000124785.8	-0.165771	0.0148346	1.01034	1.96095e-06	0.000324849	0.00113443	NRN1
ENSG00000126775.8	5.28654	0.00328033	1.00228	2.1074e-06	0.0003418	0.00113443	ATG14
ENSG00000139572.3	0.307108	0.0116215	1.00809	2.09586e-06	0.00034049	0.00113443	GPR84
ENSG00000163746.11	0.411492	0.01087	1.00756	1.91555e-06	0.000319446	0.00113443	PLSCR2
ENSG00000271109.1	2.24184	-0.00720905	0.995016	1.97698e-06	0.00032674	0.00113443	LINC03049
ENSG00000005381.7	2.12788	0.0135418	1.00943	3.49107e-06	0.000491905	0.0014856	MPO
ENSG00000007350.16	2.15313	-0.0119613	0.991743	2.68994e-06	0.000410191	0.0014856	TKTL1
ENSG00000034713.7	6.54941	0.00847351	1.00589	3.22135e-06	0.000465817	0.0014856	GABARAPL2
ENSG00000085063.14	5.73744	0.00572663	1.00398	3.20048e-06	0.000463741	0.0014856	CD59
ENSG00000086548.8	0.430578	0.0164875	1.01149	3.26861e-06	0.000470487	0.0014856	CEACAM6
ENSG00000103316.10	-0.908519	0.0115591	1.00804	3.38125e-06	0.000481446	0.0014856	CRYM
ENSG00000106261.16	6.97081	0.00176611	1.00122	3.47694e-06	0.000490571	0.0014856	ZKSCAN1
ENSG00000109906.13	3.89079	-0.0102291	0.992935	2.63143e-06	0.000403693	0.0014856	ZBTB16
ENSG00000111249.13	-0.173105	-0.0112654	0.992222	2.1742e-06	0.000350078	0.0014856	CUX2
ENSG00000114166.7	8.37936	0.0073414	1.0051	2.70467e-06	0.000411815	0.0014856	KAT2B
ENSG00000133742.13	6.78152	0.0181623	1.01267	3.10117e-06	0.000453747	0.0014856	CA1
ENSG00000134851.12	6.5625	0.00394237	1.00274	3.15199e-06	0.000458886	0.0014856	TMEM165
ENSG00000137812.19	3.38841	0.00906183	1.0063	3.01296e-06	0.000444704	0.0014856	KNL1
ENSG00000138376.10	4.43052	0.00583085	1.00405	2.82544e-06	0.000424943	0.0014856	BARD1
ENSG00000140525.17	4.08576	0.00406044	1.00282	2.89307e-06	0.000432156	0.0014856	FANCI
ENSG00000144354.13	1.53638	0.00828781	1.00576	2.44127e-06	0.000382022	0.0014856	CDCA7
ENSG00000152760.9	-0.689501	0.0130203	1.00907	2.63008e-06	0.000403542	0.0014856	DYNLT5
ENSG00000164484.11	1.07935	0.00918671	1.00639	3.26584e-06	0.000470214	0.0014856	TMEM200A
ENSG00000164821.4	1.98933	0.0205048	1.01431	2.22335e-06	0.000356095	0.0014856	DEFA4
ENSG00000166446.14	4.06378	0.0046316	1.00322	2.31383e-06	0.000367006	0.0014856	CDYL2
ENSG00000166946.13	8.04802	0.00594875	1.00413	2.31294e-06	0.0003669	0.0014856	CCNDBP1
ENSG00000170035.15	4.15893	0.00468236	1.00325	2.95433e-06	0.000438605	0.0014856	UBE2E3
ENSG00000171860.4	4.00338	0.00891279	1.0062	2.41515e-06	0.000378977	0.0014856	C3AR1
ENSG00000172159.15	3.23721	0.0080818	1.00562	2.78075e-06	0.000420122	0.0014856	FRMD3
ENSG00000175348.10	5.64578	0.00416029	1.00289	3.37489e-06	0.000480833	0.0014856	TMEM9B
ENSG00000179909.15	4.09753	-0.0109562	0.992434	3.21485e-06	0.000465172	0.0014856	ZNF154
ENSG00000181788.3	7.29334	0.0129171	1.00899	2.6057e-06	0.000400811	0.0014856	SIAH2
ENSG00000182389.19	4.02749	-0.0109042	0.99247	2.61375e-06	0.000401714	0.0014856	CACNB4
ENSG00000186184.16	6.43731	0.00639572	1.00444	2.90722e-06	0.000433652	0.0014856	POLR1D
ENSG00000188211.8	2.84636	-0.00658507	0.995446	3.30334e-06	0.000473891	0.0014856	NCR3LG1
ENSG00000188672.17	1.27317	0.0138155	1.00962	3.41825e-06	0.000484994	0.0014856	RHCE
ENSG00000197467.13	0.858181	-0.0152659	0.989474	3.24966e-06	0.00046862	0.0014856	COL13A1
ENSG00000223558.1	-1.64938	-0.00863006	0.994036	2.74579e-06	0.000416321	0.0014856	TRIM60P17
ENSG00000230662.1	-1.97294	0.00521996	1.00362	2.34434e-06	0.000370638	0.0014856	TNPO1P2
ENSG00000231233.1	0.996562	0.0109688	1.00763	3.4181e-06	0.00048498	0.0014856	CFAP58-DT
ENSG00000233030.2	0.840314	0.0129713	1.00903	2.1077e-06	0.000341834	0.0014856
ENSG00000257743.8	4.52811	0.0126019	1.00877	2.89064e-06	0.000431898	0.0014856	MGAM2
ENSG00000258227.6	2.58843	0.0102663	1.00714	2.94357e-06	0.000437477	0.0014856	CLEC5A
ENSG00000273247.5	5.03616	0.00417847	1.0029	2.52382e-06	0.000391535	0.0014856	RAB33B-AS1
ENSG00000055208.18	7.37226	0.00323254	1.00224	3.49235e-06	0.000492026	0.00156447	TAB2
ENSG00000117228.9	6.99897	0.0103491	1.0072	3.55667e-06	0.000498202	0.00156447	GBP1
ENSG00000151320.10	2.967	-0.0121638	0.991604	3.65726e-06	0.000507719	0.00156447	AKAP6
ENSG00000198176.12	6.28126	0.00963408	1.0067	3.61096e-06	0.000503359	0.00156447	TFDP1
ENSG00000224789.1	0.263411	0.0119685	1.00833	3.61264e-06	0.000503518	0.00156447
ENSG00000004897.11	6.99037	0.00491227	1.00341	3.81225e-06	0.000523133	0.00190075	CDC27
ENSG00000094804.9	0.774816	0.00829031	1.00576	3.7508e-06	0.000516994	0.00190075	CDC6
ENSG00000102837.6	1.97968	0.0239953	1.01677	4.62712e-06	0.000599674	0.00190075	OLFM4
ENSG00000104660.17	6.69285	-0.00378936	0.997377	4.08704e-06	0.000549931	0.00190075	LEPROTL1
ENSG00000124172.9	7.0783	0.00736312	1.00512	4.47276e-06	0.000585835	0.00190075	ATP5F1E
ENSG00000140939.14	1.17145	0.00843099	1.00586	4.62402e-06	0.000599399	0.00190075	NOL3
ENSG00000141034.9	4.7216	0.00807428	1.00561	4.50075e-06	0.000588366	0.00190075	GID4
ENSG00000144959.9	3.76779	0.00414987	1.00288	3.91757e-06	0.000533529	0.00190075	NCEH1
ENSG00000157404.15	1.87438	-0.00890354	0.993848	4.72193e-06	0.000608031	0.00190075	KIT
ENSG00000157445.14	2.72195	-0.00735256	0.994917	4.62753e-06	0.000599711	0.00190075	CACNA2D3
ENSG00000162923.14	8.69227	0.00603677	1.00419	3.67929e-06	0.000509781	0.00190075	WDR26
ENSG00000163444.11	5.83344	0.00393363	1.00273	4.5956e-06	0.000596872	0.00190075	TMEM183A
ENSG00000164241.13	3.8078	-0.00569385	0.996061	4.6309e-06	0.000600009	0.00190075	C5orf63
ENSG00000170486.10	1.84634	-0.0203935	0.985964	3.85053e-06	0.00052693	0.00190075	KRT72
ENSG00000173744.17	7.46645	0.00334563	1.00232	4.74957e-06	0.000610447	0.00190075	AGFG1
ENSG00000175471.19	6.71567	0.00603345	1.00419	4.53358e-06	0.000591323	0.00190075	MCTP1
ENSG00000182568.16	6.95071	-0.00439624	0.996957	4.70426e-06	0.000606481	0.00190075	SATB1
ENSG00000188761.11	1.68394	0.00759734	1.00528	3.95428e-06	0.000537115	0.00190075	BCL2L15
ENSG00000196611.4	-0.922299	0.0142341	1.00992	4.25348e-06	0.000565662	0.00190075	MMP1
ENSG00000197928.10	2.19307	-0.00843344	0.994171	3.93333e-06	0.000535071	0.00190075	ZNF677
ENSG00000198929.12	-0.856173	0.0112978	1.00786	4.32319e-06	0.000572141	0.00190075	NOS1AP
ENSG00000204514.9	4.4266	-0.0056994	0.996057	4.62629e-06	0.0005996	0.00190075	ZNF814
ENSG00000229961.2	1.16769	-0.0115509	0.992026	4.24872e-06	0.000565217	0.00190075
ENSG00000267002.2	4.73958	-0.00307367	0.997872	4.66809e-06	0.000603299	0.00190075
ENSG00000105939.12	8.4128	0.00380501	1.00264	5.56244e-06	0.000684234	0.00234261	ZC3HAV1
ENSG00000114999.7	5.19145	0.00375525	1.00261	5.19211e-06	0.000651345	0.00234261	TTL
ENSG00000119630.13	-1.30171	0.0115976	1.00807	4.7695e-06	0.000612184	0.00234261	PGF
ENSG00000133169.5	-1.24412	0.0111091	1.00773	5.11031e-06	0.000643904	0.00234261	BEX1
ENSG00000162433.14	0.232376	0.00976067	1.00679	5.4926e-06	0.000678129	0.00234261	AK4
ENSG00000169385.2	3.07462	0.0125399	1.00873	5.45549e-06	0.000674868	0.00234261	RNASE2
ENSG00000171658.8	-0.944107	0.0107743	1.0075	5.06249e-06	0.000639524	0.00234261	NMRAL2P
ENSG00000176871.8	5.62445	0.00429688	1.00298	4.92116e-06	0.000626444	0.00234261	WSB2
ENSG00000178752.15	-1.09816	0.0148108	1.01032	5.38085e-06	0.000668268	0.00234261	ERFE
ENSG00000180628.14	7.65681	0.00504904	1.00351	4.84516e-06	0.000619327	0.00234261	PCGF5
ENSG00000196407.11	-1.24372	0.0131553	1.00916	5.23204e-06	0.000654954	0.00234261	THEM5
ENSG00000198900.5	6.25401	0.00448719	1.00312	5.52555e-06	0.000681015	0.00234261	TOP1
ENSG00000213639.9	7.47482	0.00630939	1.00438	5.34076e-06	0.000664702	0.00234261	PPP1CB
ENSG00000232021.6	2.75249	-0.0119838	0.991728	5.43709e-06	0.000673246	0.00234261	LEF1-AS1
ENSG00000274173.1	1.41928	0.0170337	1.01188	5.48008e-06	0.00067703	0.00234261	LINC02967
ENSG00000013561.17	6.69033	0.00739872	1.00514	7.7961e-06	0.000879682	0.00306721	RNF14
ENSG00000025293.16	6.93166	-0.00220637	0.998472	8.6602e-06	0.000947077	0.00306721	PHF20
ENSG00000042062.11	1.92602	0.0124112	1.00864	8.38393e-06	0.000925986	0.00306721	RIPOR3
ENSG00000052802.12	3.95249	0.00531965	1.00369	6.74905e-06	0.000792046	0.00306721	MSMO1
ENSG00000056586.15	7.43719	0.00210881	1.00146	6.16992e-06	0.000740488	0.00306721	RC3H2
ENSG00000065883.14	7.56488	-0.00153025	0.99894	5.60928e-06	0.000688302	0.00306721	CDK13
ENSG00000066279.17	2.96915	0.00864427	1.00601	8.80259e-06	0.000957787	0.00306721	ASPM
ENSG00000067066.16	8.55022	0.00375584	1.00261	9.16563e-06	0.000984607	0.00306721	SP100
ENSG00000078124.11	5.53488	0.00403971	1.0028	5.95377e-06	0.000720642	0.00306721	ACER3
ENSG00000099622.13	8.05803	-0.00332622	0.997697	5.9645e-06	0.000721635	0.00306721	CIRBP
ENSG00000100448.3	0.447263	0.0163083	1.01137	8.0608e-06	0.000900778	0.00306721	CTSG
ENSG00000101412.12	1.63681	0.00949774	1.00661	8.72023e-06	0.000951606	0.00306721	E2F1
ENSG00000106462.10	3.55127	0.00490634	1.00341	9.16378e-06	0.000984473	0.00306721	EZH2
ENSG00000114631.10	0.537171	-0.00950161	0.993436	8.1374e-06	0.000906807	0.00306721	PODXL2
ENSG00000121797.9	2.65259	0.00632905	1.0044	6.21506e-06	0.000744591	0.00306721	CCRL2
ENSG00000122986.13	5.82255	-0.00528469	0.996344	7.3401e-06	0.00084236	0.00306721	HVCN1
ENSG00000129691.15	5.62574	0.00366642	1.00254	8.31847e-06	0.000920927	0.00306721	ASH2L
ENSG00000135318.11	2.86884	-0.01193	0.991765	8.65885e-06	0.000946975	0.00306721	NT5E
ENSG00000138685.13	-0.437583	0.01346	1.00937	8.98139e-06	0.000971082	0.00306721	FGF2
ENSG00000140416.19	5.11805	0.00677339	1.00471	8.75324e-06	0.000954087	0.00306721	TPM1
ENSG00000143167.11	2.44771	-0.00830401	0.994261	8.34253e-06	0.000922789	0.00306721	GPA33
ENSG00000143546.9	8.26577	0.0123049	1.00857	7.88901e-06	0.000887133	0.00306721	S100A8
ENSG00000143727.15	6.18797	0.00567945	1.00394	8.55011e-06	0.000938722	0.00306721	ACP1
ENSG00000144407.9	0.98365	0.00815471	1.00567	8.91895e-06	0.000966458	0.00306721	PTH2R
ENSG00000145687.16	6.04243	-0.00355851	0.997536	9.21307e-06	0.000988062	0.00306721	SSBP2
ENSG00000150093.18	7.94842	0.00489341	1.0034	7.72362e-06	0.000873833	0.00306721	ITGB1
ENSG00000152894.14	2.64378	-0.0121816	0.991592	8.83819e-06	0.000960447	0.00306721	PTPRK
ENSG00000155324.9	2.36278	-0.00546203	0.996221	8.11601e-06	0.000905127	0.00306721	GRAMD2B
ENSG00000156136.9	5.79731	0.00468966	1.00326	9.11801e-06	0.000981128	0.00306721	DCK
ENSG00000156515.21	6.81191	0.00883435	1.00614	7.92846e-06	0.000890282	0.00306721	HK1
ENSG00000157625.15	6.08749	0.00305146	1.00212	7.09598e-06	0.00082185	0.00306721	TAB3
ENSG00000165434.7	4.66814	0.00631821	1.00439	8.81015e-06	0.000958352	0.00306721	PGM2L1
ENSG00000168615.11	4.82941	0.00521048	1.00362	7.28858e-06	0.000838062	0.00306721	ADAM9
ENSG00000169439.11	1.21726	-0.0122904	0.991517	6.64539e-06	0.000782986	0.00306721	SDC2
ENSG00000170515.13	4.7188	0.00577593	1.00401	6.63971e-06	0.000782487	0.00306721	PA2G4
ENSG00000173825.6	2.9234	-0.00962892	0.993348	6.69153e-06	0.000787027	0.00306721	TIGD3
ENSG00000180543.4	1.45857	-0.0088342	0.993895	7.06663e-06	0.000819359	0.00306721	TSPYL5
ENSG00000181381.13	8.64282	0.00752399	1.00523	6.6395e-06	0.000782468	0.00306721	DDX60L
ENSG00000182512.4	7.21928	0.0130789	1.00911	7.31983e-06	0.000840671	0.00306721	GLRX5
ENSG00000198046.11	0.964975	-0.0118682	0.991807	7.38069e-06	0.000845733	0.00306721	ZNF667
ENSG00000214652.5	-0.152931	-0.0146351	0.989907	7.47258e-06	0.000853333	0.00306721	ZNF727
ENSG00000225830.12	6.31641	-0.00243162	0.998316	7.9341e-06	0.000890731	0.00306721	ERCC6
ENSG00000235621.8	1.60517	-0.0123412	0.991482	8.95686e-06	0.000969267	0.00306721	LINC00494
ENSG00000240003.2	-0.0405979	0.00927834	1.00645	6.1818e-06	0.00074157	0.00306721	RPL7P24
ENSG00000242550.5	0.705292	0.0162677	1.01134	9.06967e-06	0.000977585	0.00306721	SERPINB10
ENSG00000251369.8	4.60366	-0.00477765	0.996694	8.82688e-06	0.000959603	0.00306721	ZNF550
ENSG00000255929.5	-1.56747	0.008084	1.00562	6.21438e-06	0.000744529	0.00306721	PIWIL4-AS1
ENSG00000266445.1	-2.03323	-0.00238821	0.998346	6.66245e-06	0.000784481	0.00306721	NARF-AS1
ENSG00000268521.1	2.42448	-0.00557009	0.996147	9.1406e-06	0.00098278	0.00306721	VN1R83P
ENSG00000269404.6	2.92641	-0.00966293	0.993325	8.90926e-06	0.000965738	0.00306721	SPIB
ENSG00000126088.13	4.94102	0.00572132	1.00397	9.36595e-06	0.000999253	0.00320413	UROD
ENSG00000145545.11	4.68407	0.00387899	1.00269	9.27439e-06	0.00099251	0.00320413	SRD5A1
ENSG00000198363.17	6.49659	0.00707073	1.00491	9.46083e-06	0.0010062	0.00320413	ASPH
ENSG00000100320.22	0.520732	-0.00924783	0.99361	9.96963e-06	0.00104318	0.00330328	RBFOX2
ENSG00000112290.12	0.426069	0.00881226	1.00613	1.00586e-05	0.00104952	0.00330328	WASF1
ENSG00000113361.12	-1.51492	0.00989342	1.00688	9.50411e-06	0.00100935	0.00330328	CDH6
ENSG00000116898.11	3.88005	0.0037623	1.00261	9.87588e-06	0.00103644	0.00330328	MRPS15
ENSG00000131471.6	1.96081	-0.0118309	0.991833	9.90155e-06	0.00103829	0.00330328	AOC3
ENSG00000169583.12	0.695785	-0.0112812	0.992211	1.00098e-05	0.00104605	0.00330328	CLIC3
ENSG00000175063.16	0.699888	0.00882908	1.00614	9.70973e-06	0.00102441	0.00330328	UBE2C
ENSG00000253214.1	0.463155	0.0109566	1.00762	9.66556e-06	0.0010212	0.00330328
ENSG00000110079.16	2.4653	0.0094131	1.00655	1.16358e-05	0.00118296	0.00655193	MS4A4A
ENSG00000119326.14	3.45306	0.0133085	1.00927	1.1757e-05	0.00119303	0.00655193	CTNNAL1
ENSG00000124225.15	1.69399	-0.00986948	0.993182	1.09324e-05	0.00112371	0.00655193	PMEPA1
ENSG00000137752.23	7.53481	0.00517846	1.0036	1.10212e-05	0.00113126	0.00655193	CASP1
ENSG00000165678.20	7.31641	0.00414846	1.00288	1.09368e-05	0.00112408	0.00655193	GHITM
ENSG00000166211.7	-1.73756	0.00678912	1.00472	1.10271e-05	0.00113176	0.00655193	SPIC
ENSG00000175352.10	0.683034	0.0103481	1.0072	1.13219e-05	0.00115667	0.00655193	NRIP3
ENSG00000183690.12	2.83467	-0.0068594	0.995257	1.17146e-05	0.00118951	0.00655193	EFHC2
ENSG00000235531.9	1.82458	0.0108345	1.00754	1.16606e-05	0.00118502	0.00655193	MSC-AS1
ENSG00000236570.1	0.582958	-0.00878247	0.993931	1.01357e-05	0.001055	0.00655193	RAD23BP1
ENSG00000264204.2	1.0903	-0.0123023	0.991509	1.05723e-05	0.00109286	0.00655193	AGAP7P
ENSG00000009307.15	9.2352	0.00408737	1.00284	1.94656e-05	0.00179677	0.00789525	CSDE1
ENSG00000047597.5	6.18593	0.0131432	1.00915	2.17691e-05	0.00195669	0.00789525	XK
ENSG00000048140.17	4.98072	0.00572979	1.00398	1.26807e-05	0.00127133	0.00789525	TSPAN17
ENSG00000055732.12	0.351173	0.0117801	1.0082	1.66399e-05	0.00158841	0.00789525	MCOLN3
ENSG00000058091.16	5.40944	0.00642191	1.00446	2.08114e-05	0.00189123	0.00789525	CDK14
ENSG00000080819.6	4.59073	0.0030466	1.00211	1.7349e-05	0.00164203	0.00789525	CPOX
ENSG00000083814.13	5.01491	-0.00317249	0.997803	1.45174e-05	0.0014223	0.00789525	ZNF671
ENSG00000089041.16	5.05631	0.00574379	1.00399	1.59192e-05	0.00153297	0.00789525	P2RX7
ENSG00000099910.16	5.22505	-0.00408789	0.997171	1.27179e-05	0.00127446	0.00789525	KLHL22
ENSG00000107249.21	0.953208	-0.0115695	0.992013	1.72617e-05	0.00163547	0.00789525	GLIS3
ENSG00000111144.9	8.28278	0.00570876	1.00396	1.51858e-05	0.00147555	0.00789525	LTA4H
ENSG00000112308.12	8.56024	0.0032091	1.00223	2.1441e-05	0.00193443	0.00789525	C6orf62
ENSG00000114698.14	0.724075	0.0115072	1.00801	1.60549e-05	0.00154349	0.00789525	PLSCR4
ENSG00000118985.15	4.46128	0.00479757	1.00333	1.3749e-05	0.00135998	0.00789525	ELL2
ENSG00000126858.16	6.35854	0.00428977	1.00298	1.53884e-05	0.00149152	0.00789525	RHOT1
ENSG00000128245.14	4.14081	0.00435945	1.00303	2.08626e-05	0.00189476	0.00789525	YWHAH
ENSG00000131747.14	2.43386	0.00857263	1.00596	1.74569e-05	0.00165011	0.00789525	TOP2A
ENSG00000131979.18	5.89615	0.00463412	1.00322	2.24717e-05	0.00200381	0.00789525	GCH1
ENSG00000133106.14	5.78969	0.0120279	1.00837	2.15625e-05	0.00194269	0.00789525	EPSTI1
ENSG00000136634.5	-1.59578	0.00763126	1.0053	1.66672e-05	0.00159049	0.00789525	IL10
ENSG00000137094.14	1.47732	-0.00977551	0.993247	1.5909e-05	0.00153218	0.00789525	DNAJB5
ENSG00000137965.10	5.16746	0.0148802	1.01037	1.58351e-05	0.00152644	0.00789525	IFI44
ENSG00000139323.13	5.55537	0.00538522	1.00374	1.30026e-05	0.0012983	0.00789525	POC1B
ENSG00000140104.13	0.631275	-0.00762441	0.994729	1.3649e-05	0.00135179	0.00789525	CLBA1
ENSG00000146373.16	3.70477	0.0060038	1.00417	1.92241e-05	0.00177949	0.00789525	RNF217
ENSG00000147202.17	6.02445	0.00338317	1.00235	1.21159e-05	0.00122348	0.00789525	DIAPH2
ENSG00000148154.9	5.71677	0.00475302	1.0033	1.90269e-05	0.00176533	0.00789525	UGCG
ENSG00000149557.12	1.48677	-0.0100116	0.993085	1.91731e-05	0.00177583	0.00789525	FEZ1
ENSG00000154914.16	-0.248045	-0.00974195	0.99327	1.89317e-05	0.00175846	0.00789525	USP43
ENSG00000158079.14	3.57533	-0.00476191	0.996705	2.2111e-05	0.00197972	0.00789525	PTPDC1
ENSG00000164105.3	3.03716	0.00600344	1.00417	1.18581e-05	0.00120141	0.00789525	SAP30
ENSG00000165061.14	-0.296371	-0.0145719	0.98995	2.27916e-05	0.00202502	0.00789525	ZMAT4
ENSG00000166171.12	2.47803	0.0107745	1.0075	1.888e-05	0.00175472	0.00789525	DPCD
ENSG00000170540.14	6.93869	0.00547271	1.0038	1.36388e-05	0.00135096	0.00789525	ARL6IP1
ENSG00000171291.8	4.39933	-0.00589774	0.99592	2.02004e-05	0.0018487	0.00789525	ZNF439
ENSG00000172939.8	6.56691	0.00309131	1.00215	1.7732e-05	0.0016706	0.00789525	OXSR1
ENSG00000173852.14	4.71599	0.00416163	1.00289	2.01121e-05	0.00184251	0.00789525	DPY19L1
ENSG00000174749.5	3.3133	0.00472599	1.00328	2.13429e-05	0.00192774	0.00789525	FAM241A
ENSG00000175746.6	1.82663	-0.0123615	0.991468	1.80602e-05	0.00169489	0.00789525	LINC02915
ENSG00000177409.11	7.95842	0.00820662	1.0057	1.54384e-05	0.00149544	0.00789525	SAMD9L
ENSG00000179918.18	4.6545	0.00323861	1.00225	1.74558e-05	0.00165002	0.00789525	SEPHS2
ENSG00000183621.15	5.14051	0.00631071	1.00438	2.15967e-05	0.00194501	0.00789525	ZNF438
ENSG00000185897.6	-1.26972	0.0097878	1.00681	1.97032e-05	0.00181366	0.00789525	FFAR3
ENSG00000186591.11	7.99479	0.00822077	1.00571	1.72631e-05	0.00163558	0.00789525	UBE2H
ENSG00000186834.3	5.41368	0.00417504	1.0029	1.59531e-05	0.00153561	0.00789525	HEXIM1
ENSG00000187244.10	0.34796	0.0158567	1.01105	2.15302e-05	0.0019405	0.00789525	BCAM
ENSG00000187735.13	5.48032	0.00414791	1.00288	1.90136e-05	0.00176437	0.00789525	TCEA1
ENSG00000189221.9	0.873974	0.0191228	1.01334	1.29621e-05	0.00129491	0.00789525	MAOA
ENSG00000198821.10	7.47383	-0.00565568	0.996087	1.83353e-05	0.00171509	0.00789525	CD247
ENSG00000239839.6	3.78003	0.0254328	1.01778	2.25976e-05	0.00201218	0.00789525	DEFA3
ENSG00000240012.1	-0.662018	-0.0107591	0.99257	1.68267e-05	0.00160262	0.00789525	SLC9A9-AS1
ENSG00000248334.6	3.41836	-0.00624275	0.995682	2.24613e-05	0.00200313	0.00789525	WHAMMP2
ENSG00000249236.1	-1.57255	-0.00786348	0.994564	1.92676e-05	0.00178262	0.00789525
ENSG00000251034.1	2.03291	-0.00741454	0.994874	2.0172e-05	0.00184672	0.00789525
ENSG00000259986.1	-1.01796	0.0110365	1.00768	1.5063e-05	0.00146583	0.00789525
ENSG00000267128.1	-0.255244	-0.0103085	0.99288	1.36239e-05	0.00134973	0.00789525	RNF157-AS1
ENSG00000272914.1	1.04193	0.00859159	1.00597	2.1354e-05	0.00192849	0.00789525
ENSG00000283064.1	1.17638	0.00733937	1.0051	1.36581e-05	0.00135254	0.00789525	H2BC6-AS1
ENSG00000116678.19	3.99242	0.00808387	1.00562	2.28019e-05	0.0020257	0.00809705	LEPR
ENSG00000179455.7	0.896282	-0.0133184	0.990811	2.31172e-05	0.00204663	0.00809705	MKRN3

## Sheet: d.GrimAge
Table S1d. Differentially Expressed Genes for the GrimAge Clock at FDR<.01
Ensemble Name	base mean	coefficient (log2)	coefficient (natural)	pvalue	qval	FDR-adjustedP	Gene Symbol
ENSG00000154165.4	2.60723	0.135204	1.09825	0	0	5.52073e-67	GPR15
ENSG00000253230.8	-1.97811	0.06019	1.0426	1.59213e-71	2.76036e-67	6.72827e-29	MIR124-1HG
ENSG00000063438.16	-0.183407	0.0534756	1.03776	1.94037e-33	2.24276e-29	5.29819e-26	AHRR
ENSG00000111961.17	3.039	0.0406024	1.02854	1.52989e-30	1.32623e-26	1.53458e-25	SASH1
ENSG00000167680.15	-0.496088	0.0494149	1.03485	5.9555e-30	4.13015e-26	6.10063e-25	SEMA6B
ENSG00000157168.18	3.02753	0.0631226	1.04472	2.35492e-29	1.36095e-25	1.90221e-24	NRG1
ENSG00000055732.12	0.347069	0.0487987	1.0344	7.84072e-29	3.88397e-25	5.72281e-24	MCOLN3
ENSG00000134755.14	5.4166	0.047165	1.03323	2.43448e-28	1.0552e-24	2.8416e-23	DSC2
ENSG00000230817.5	-1.17313	0.0417061	1.02933	1.06294e-27	4.09529e-24	4.06322e-23	LINC01362
ENSG00000080822.16	5.96029	0.0164502	1.01147	2.23474e-27	7.74898e-24	1.83288e-19	CLDND1
ENSG00000250562.1	-1.89097	0.0215914	1.01508	5.44559e-24	1.71197e-20	1.83288e-19	RPL38P4
ENSG00000077063.10	-0.534846	0.0467245	1.03292	1.0574e-23	3.05545e-20	9.87924e-17	CTTNBP2
ENSG00000135898.9	2.13361	0.0322781	1.02263	2.85966e-21	7.62762e-18	1.28944e-15	GPR55
ENSG00000080819.6	4.58941	0.0104702	1.00728	4.00459e-20	9.91854e-17	1.90688e-15	CPOX
ENSG00000122420.9	-0.679283	0.0518357	1.03658	1.02536e-19	2.34895e-16	1.90688e-15	PTGFR
ENSG00000166503.8	2.98166	0.0295611	1.0207	1.50031e-19	3.25148e-16	5.01714e-15	HDGFL3
ENSG00000143344.15	2.24716	0.0198736	1.01387	2.94721e-19	6.01147e-16	3.77974e-13	RGL1
ENSG00000091436.16	5.07936	0.0181291	1.01265	1.11952e-17	2.15663e-14	4.85355e-13	MAP3K20
ENSG00000134333.13	6.50245	0.0102831	1.00715	2.32294e-16	3.56171e-13	1.9865e-12	LDHA
ENSG00000139679.15	5.39898	0.0294635	1.02063	2.49339e-16	3.77342e-13	1.9865e-12	LPAR6
ENSG00000155307.17	5.55497	0.0162698	1.01134	2.65035e-16	3.96356e-13	1.9865e-12	SAMSN1
ENSG00000175746.6	1.83238	-0.0392794	0.973141	2.51924e-17	4.59762e-14	1.9865e-12	LINC02915
ENSG00000254275.6	0.615914	0.0408942	1.02875	1.47478e-16	2.41964e-13	1.9865e-12	LINC00824
ENSG00000143771.11	5.47382	0.011404	1.00794	7.0375e-16	9.12209e-13	4.94219e-12	CNIH4
ENSG00000163754.17	5.04704	0.0138701	1.00966	5.54132e-16	7.4761e-13	4.94219e-12	GYG1
ENSG00000234424.2	0.208422	0.0269773	1.01888	3.11637e-16	4.50252e-13	4.94219e-12
ENSG00000265531.3	1.02157	0.0419619	1.02951	7.93058e-16	1.00444e-12	4.94219e-12	FCGR1CP
ENSG00000006715.15	7.00897	-0.00784778	0.994575	2.74853e-15	3.19255e-12	3.49411e-11	VPS41
ENSG00000124334.17	-0.152157	0.0306991	1.02151	4.96602e-15	5.37224e-12	3.49411e-11	IL9R
ENSG00000135525.18	2.08057	-0.0240701	0.983454	8.8175e-16	1.09196e-12	3.49411e-11	MAP7
ENSG00000165185.14	3.47294	0.0172369	1.01202	3.02146e-15	3.47801e-12	3.49411e-11	KIAA1958
ENSG00000187554.11	5.14316	0.0229687	1.01605	5.54801e-15	5.89561e-12	3.49411e-11	TLR5
ENSG00000005302.17	6.34057	0.00912547	1.00635	3.77937e-14	3.23348e-11	1.46794e-10	MSL3
ENSG00000026508.17	8.64962	0.00905295	1.00629	5.9201e-15	6.22061e-12	1.46794e-10	CD44
ENSG00000151012.13	1.90316	0.0247028	1.01727	4.79663e-14	3.87412e-11	1.46794e-10	SLC7A11
ENSG00000152990.13	1.87967	-0.0269904	0.981466	4.01094e-14	3.38591e-11	1.46794e-10	ADGRA3
ENSG00000159713.10	1.53167	-0.0304781	0.979096	2.11995e-14	2.00795e-11	1.46794e-10	TPPP3
ENSG00000182389.19	4.03331	-0.0285027	0.980437	2.52792e-14	2.33295e-11	1.46794e-10	CACNB4
ENSG00000183019.7	1.28257	0.0309492	1.02168	3.48761e-14	3.03549e-11	1.46794e-10	MCEMP1
ENSG00000197353.3	-0.00068261	-0.038127	0.973918	3.1453e-14	2.79427e-11	1.46794e-10	LYPD2
ENSG00000198734.10	6.29537	0.021286	1.01486	1.99661e-14	1.9063e-11	1.46794e-10	F5
ENSG00000165949.12	2.64796	0.0682805	1.04847	4.82543e-14	3.89122e-11	3.51601e-10	IFI27
ENSG00000107281.9	2.17862	0.0315994	1.02214	5.83942e-14	4.60188e-11	4.78555e-10	NPDC1
ENSG00000105048.16	0.89081	0.0419589	1.02951	7.21953e-14	5.56307e-11	5.42009e-10	TNNT1
ENSG00000008394.12	2.92066	0.0188835	1.01318	8.78263e-14	6.62041e-11	9.36087e-10	MGST1
ENSG00000011201.11	-1.22973	0.0315135	1.02208	1.14822e-13	8.47123e-11	1.07213e-09	ANOS1
ENSG00000151136.14	4.3613	-0.0172407	0.988121	2.96909e-13	2.05106e-10	2.38773e-09	ABTB3
ENSG00000188313.12	6.48162	0.0245762	1.01718	1.45742e-13	1.05284e-10	2.38773e-09	PLSCR1
ENSG00000279320.1	2.68646	0.0253842	1.01775	2.85733e-13	1.98026e-10	2.38773e-09
ENSG00000080854.14	2.2804	0.0266761	1.01866	9.64989e-13	5.98741e-10	4.34816e-09	IGSF9B
ENSG00000138772.12	5.10406	0.0317274	1.02224	3.52322e-13	2.39545e-10	4.34816e-09	ANXA3
ENSG00000146250.6	-1.28045	-0.0291569	0.979993	6.89439e-13	4.4528e-10	4.34816e-09	PRSS35
ENSG00000150337.13	3.65692	0.0326004	1.02285	9.94912e-13	6.14682e-10	4.34816e-09	FCGR1A
ENSG00000173114.12	2.47214	0.0511133	1.03606	8.31096e-13	5.25709e-10	4.34816e-09	LRRN3
ENSG00000198964.13	6.11938	0.00633447	1.0044	7.76155e-13	4.94912e-10	4.34816e-09	SGMS1
ENSG00000038427.15	10.518	0.0168845	1.01177	3.83632e-12	1.94963e-09	8.43391e-09	VCAN
ENSG00000055332.16	6.72787	0.0220763	1.01542	3.03668e-12	1.62138e-09	8.43391e-09	EIF2AK2
ENSG00000087128.9	-1.65356	0.0266715	1.01866	2.79669e-12	1.51627e-09	8.43391e-09	TMPRSS11E
ENSG00000118113.11	2.48836	0.050195	1.0354	3.96546e-12	1.9997e-09	8.43391e-09	MMP8
ENSG00000163221.8	5.96405	0.0284728	1.01993	1.7618e-12	1.02327e-09	8.43391e-09	S100A12
ENSG00000171714.10	1.54495	0.0265037	1.01854	1.73566e-12	1.00991e-09	8.43391e-09	ANO5
ENSG00000179934.6	1.28436	0.0267431	1.01871	1.1047e-12	6.72031e-10	8.43391e-09	CCR8
ENSG00000179978.11	3.02809	0.0218921	1.01529	2.98716e-12	1.59995e-09	8.43391e-09	NAIPP2
ENSG00000206199.10	1.69301	-0.0267158	0.981652	3.71985e-12	1.90381e-09	8.43391e-09	ANKUB1
ENSG00000233392.5	1.87219	-0.0334368	0.97709	3.50971e-12	1.81946e-09	8.43391e-09	UICLM
ENSG00000249437.7	5.80537	0.026117	1.01827	3.64486e-12	1.87395e-09	8.43391e-09	NAIP
ENSG00000029153.14	1.11523	0.0218319	1.01525	5.38732e-12	2.61387e-09	1.91695e-08	BMAL2
ENSG00000111912.19	5.80657	0.00788539	1.00548	7.40015e-12	3.41642e-09	1.91695e-08	NCOA7
ENSG00000122986.13	5.82547	-0.0130237	0.991013	7.43763e-12	3.43063e-09	1.91695e-08	HVCN1
ENSG00000183696.13	5.84179	0.010528	1.00732	6.09283e-12	2.90432e-09	1.91695e-08	UPP1
ENSG00000197006.13	7.16152	0.0149108	1.01039	7.84578e-12	3.5837e-09	1.91695e-08	METTL9
ENSG00000217275.2	0.247051	0.0277257	1.0194	4.02342e-12	2.02192e-09	1.91695e-08
ENSG00000223725.6	1.7917	-0.0214424	0.985247	5.2666e-12	2.56313e-09	1.91695e-08
ENSG00000065911.11	4.99107	0.0113784	1.00792	1.44415e-11	6.18283e-09	4.54829e-08	MTHFD2
ENSG00000129757.12	3.9084	-0.0290805	0.980045	1.44063e-11	6.16981e-09	4.54829e-08	CDKN1C
ENSG00000161944.16	1.91433	0.0239675	1.01675	7.89323e-12	3.6013e-09	4.54829e-08	ASGR2
ENSG00000163520.13	0.356127	-0.0310611	0.9787	1.02694e-11	4.57637e-09	4.54829e-08	FBLN2
ENSG00000168702.17	0.137182	-0.03026	0.979244	1.13111e-11	4.98963e-09	4.54829e-08	LRP1B
ENSG00000096063.15	6.6896	0.0149511	1.01042	1.44517e-11	6.18658e-09	5.60594e-08	SRPK1
ENSG00000129521.13	2.15679	0.018628	1.013	1.88549e-11	7.80898e-09	5.60594e-08	EGLN3
ENSG00000165061.14	-0.288488	-0.0373176	0.974465	1.76922e-11	7.39092e-09	5.60594e-08	ZMAT4
ENSG00000179104.8	4.81139	0.0112858	1.00785	1.98666e-11	8.16695e-09	5.60594e-08	TMTC2
ENSG00000092200.12	3.51693	-0.0203974	0.985961	3.6938e-11	1.40675e-08	9.18354e-08	RPGRIP1
ENSG00000125384.6	5.56094	0.0104729	1.00729	2.09185e-11	8.53354e-09	9.18354e-08	PTGER2
ENSG00000134769.21	0.607599	0.0235618	1.01647	3.07465e-11	1.20181e-08	9.18354e-08	DTNA
ENSG00000140939.14	1.16665	0.0196074	1.01368	4.0782e-11	1.52878e-08	9.18354e-08	NOL3
ENSG00000180611.6	2.20724	0.0188493	1.01315	2.52321e-11	1.00997e-08	9.18354e-08	MB21D2
ENSG00000197121.14	3.78589	0.0151538	1.01056	2.90056e-11	1.14223e-08	9.18354e-08	PGAP1
ENSG00000226640.2	-0.519954	0.0256556	1.01794	3.50304e-11	1.34474e-08	9.18354e-08
ENSG00000227165.7	1.787	-0.0206971	0.985756	4.08062e-11	1.52954e-08	9.18354e-08	WDR11-DT
ENSG00000173914.11	4.00507	-0.00704001	0.995132	4.21061e-11	1.56993e-08	1.56012e-07	RBM4B
ENSG00000077684.15	6.67914	-0.00605548	0.995811	5.6076e-11	2.04518e-08	3.05599e-07	JADE1
ENSG00000105939.12	8.41063	0.00878428	1.00611	8.20781e-11	2.90341e-08	3.05599e-07	ZC3HAV1
ENSG00000108950.11	0.77554	0.0328158	1.02301	7.88252e-11	2.79888e-08	3.05599e-07	FAM20A
ENSG00000137965.10	5.15922	0.0366079	1.0257	4.66053e-11	1.7192e-08	3.05599e-07	IFI44
ENSG00000152061.23	8.3611	-0.00800485	0.994467	7.42007e-11	2.64891e-08	3.05599e-07	RABGAP1L
ENSG00000198363.17	6.49259	0.0166662	1.01162	9.92043e-11	3.44102e-08	3.05599e-07	ASPH
ENSG00000100095.18	1.04707	-0.0232129	0.984039	9.94846e-11	3.44964e-08	3.24265e-07	SEZ6L
ENSG00000164430.15	4.72146	0.00867361	1.00603	1.11058e-10	3.80388e-08	3.24265e-07	CGAS
ENSG00000183813.6	5.54166	0.0161745	1.01127	1.18445e-10	4.02549e-08	3.24265e-07	CCR4
ENSG00000067066.16	8.54808	0.00874767	1.00608	1.5471e-10	5.11042e-08	4.77345e-07	SP100
ENSG00000068305.17	6.33414	0.00912352	1.00634	1.27539e-10	4.29363e-08	4.77345e-07	MEF2A
ENSG00000181381.13	8.63849	0.017186	1.01198	1.83957e-10	5.95595e-08	4.77345e-07	DDX60L
ENSG00000187474.4	1.23276	0.0258561	1.01808	1.91517e-10	6.1691e-08	4.77345e-07	FPR3
ENSG00000198019.12	3.88826	0.025695	1.01797	1.67089e-10	5.47244e-08	4.77345e-07	FCGR1BP
ENSG00000124107.5	2.93512	0.0314154	1.02201	2.621e-10	8.13997e-08	6.24261e-07	SLPI
ENSG00000163877.10	5.11126	-0.00560435	0.996123	2.68108e-10	8.30174e-08	6.24261e-07	SNIP1
ENSG00000164125.15	5.9584	0.0167885	1.0117	2.38657e-10	7.49937e-08	6.24261e-07	GASK1B
ENSG00000233057.1	-0.252335	0.021094	1.01473	1.9637e-10	6.30478e-08	6.24261e-07	EEF1A1P14
ENSG00000112655.15	1.28131	-0.0230243	0.984167	3.53556e-10	1.0671e-07	1.02305e-06	PTK7
ENSG00000163746.11	0.405034	0.0230987	1.01614	3.69845e-10	1.11093e-07	1.02305e-06	PLSCR2
ENSG00000170558.8	0.758653	-0.0322402	0.977901	3.49009e-10	1.05479e-07	1.02305e-06	CDH2
ENSG00000258819.1	4.24012	-0.0297502	0.97959	2.68383e-10	8.30911e-08	1.02305e-06	LINC02289
ENSG00000070214.15	5.89286	0.00693413	1.00482	6.04548e-10	1.70323e-07	1.06892e-06	SLC44A1
ENSG00000091129.19	0.388186	-0.0364918	0.975023	4.81807e-10	1.40281e-07	1.06892e-06	NRCAM
ENSG00000114737.15	5.08282	0.015743	1.01097	8.4558e-10	2.24e-07	1.06892e-06	CISH
ENSG00000125810.9	8.70991	-0.0176628	0.987832	7.45227e-10	2.02451e-07	1.06892e-06	CD93
ENSG00000137831.14	1.91222	0.019098	1.01333	6.92801e-10	1.9075e-07	1.06892e-06	UACA
ENSG00000137959.15	5.59179	0.0441433	1.03107	7.87272e-10	2.11612e-07	1.06892e-06	IFI44L
ENSG00000143457.10	4.47083	0.0074014	1.00514	3.86398e-10	1.15503e-07	1.06892e-06	GOLPH3L
ENSG00000144290.16	2.44801	-0.0398339	0.972767	4.7986e-10	1.39788e-07	1.06892e-06	SLC4A10
ENSG00000154188.9	2.99727	-0.0220238	0.98485	4.83195e-10	1.40632e-07	1.06892e-06	ANGPT1
ENSG00000164484.11	1.0739	0.0195712	1.01366	8.34177e-10	2.21606e-07	1.06892e-06	TMEM200A
ENSG00000172995.16	-0.961736	-0.0265381	0.981773	6.43419e-10	1.79436e-07	1.06892e-06	ARPP21
ENSG00000234902.6	0.657658	-0.0230192	0.984171	7.28594e-10	1.98772e-07	1.06892e-06
ENSG00000257017.8	1.415	0.0347427	1.02437	6.15467e-10	1.72902e-07	1.06892e-06	HP
ENSG00000268170.2	2.72502	0.0257221	1.01799	7.05155e-10	1.93536e-07	1.06892e-06
ENSG00000283646.1	0.913083	0.0361928	1.0254	5.6743e-10	1.61445e-07	1.06892e-06	LINC02009
ENSG00000111145.7	4.71982	0.0077931	1.00542	9.33175e-10	2.43972e-07	1.79531e-06	ELK3
ENSG00000129538.13	-1.51551	0.0219318	1.01532	8.488e-10	2.24674e-07	1.79531e-06	RNASE1
ENSG00000163171.7	7.58458	0.010797	1.00751	9.86436e-10	2.55912e-07	1.79531e-06	CDC42EP3
ENSG00000231389.7	8.14784	-0.0123526	0.991474	1.0958e-09	2.79863e-07	1.79531e-06	HLA-DPA1
ENSG00000253276.2	4.91879	0.0125383	1.00873	1.07e-09	2.74279e-07	1.79531e-06	CCDC71L
ENSG00000072840.12	1.08257	0.0228751	1.01598	1.21056e-09	3.04506e-07	1.92789e-06	EVC
ENSG00000109189.12	4.16532	0.0110427	1.00768	1.10768e-09	2.82418e-07	1.92789e-06	USP46
ENSG00000110042.7	3.75164	-0.0159126	0.989031	1.40945e-09	3.45568e-07	1.92789e-06	DTX4
ENSG00000163565.18	7.88047	0.0113941	1.00793	1.36872e-09	3.37328e-07	1.92789e-06	IFI16
ENSG00000182010.10	3.52187	0.0218159	1.01524	1.26668e-09	3.16308e-07	1.92789e-06	RTKN2
ENSG00000182489.8	1.31785	-0.0255745	0.982429	1.30335e-09	3.23924e-07	1.92789e-06	XKRX
ENSG00000082014.16	4.05479	0.0158971	1.01108	1.63462e-09	3.89712e-07	1.9477e-06	SMARCD3
ENSG00000147883.10	2.21675	0.0168992	1.01178	1.65231e-09	3.93078e-07	1.9477e-06	CDKN2B
ENSG00000255221.3	1.95425	0.0246032	1.0172	1.44127e-09	3.51945e-07	1.9477e-06	CARD17P
ENSG00000261115.5	-0.434418	0.0252297	1.01764	1.54841e-09	3.73097e-07	1.9477e-06	TMEM178B
ENSG00000078098.13	-1.05867	0.0248768	1.01739	2.22979e-09	5.12585e-07	4.03977e-06	FAP
ENSG00000134460.15	3.62636	0.0145627	1.01015	1.66595e-09	3.95664e-07	4.03977e-06	IL2RA
ENSG00000143546.9	8.25852	0.0266572	1.01865	2.0527e-09	4.76681e-07	4.03977e-06	S100A8
ENSG00000145555.14	1.11906	0.024338	1.01701	2.32017e-09	5.30634e-07	4.03977e-06	MYO10
ENSG00000211640.4	-0.189569	0.0300889	1.02108	2.02297e-09	4.7058e-07	4.03977e-06	IGLV6-57
ENSG00000273247.5	5.03365	0.00860932	1.00599	1.93925e-09	4.5329e-07	4.03977e-06	RAB33B-AS1
ENSG00000130487.5	0.925985	0.0217011	1.01516	2.83406e-09	6.37149e-07	7.27373e-06	KLHDC7B
ENSG00000138061.11	5.58652	0.019397	1.01354	2.36497e-09	5.3951e-07	7.27373e-06	CYP1B1
ENSG00000154217.14	6.11004	-0.00577364	0.996006	2.82699e-09	6.35699e-07	7.27373e-06	PITPNC1
ENSG00000106341.10	-0.61772	-0.0261691	0.982025	5.50205e-09	1.14682e-06	7.65453e-06	PPP1R17
ENSG00000106952.7	5.66693	0.00818844	1.00569	7.02843e-09	1.4065e-06	7.65453e-06	TNFSF8
ENSG00000108984.13	5.11088	0.00970583	1.00675	5.49797e-09	1.14609e-06	7.65453e-06	MAP2K6
ENSG00000111886.10	1.72996	0.0203052	1.01417	4.49453e-09	9.63238e-07	7.65453e-06	GABRR2
ENSG00000112053.13	3.18698	0.0252432	1.01765	5.21182e-09	1.09497e-06	7.65453e-06	SLC26A8
ENSG00000116977.18	7.20419	0.00578264	1.00402	2.99427e-09	6.6985e-07	7.65453e-06	LGALS8
ENSG00000128512.20	5.70515	0.0216073	1.01509	7.02104e-09	1.4053e-06	7.65453e-06	DOCK4
ENSG00000135722.8	2.06295	0.0147914	1.01031	4.38693e-09	9.4302e-07	7.65453e-06	FBXL8
ENSG00000147324.10	5.52897	0.0116798	1.00813	6.32331e-09	1.28916e-06	7.65453e-06	MFHAS1
ENSG00000148143.12	-0.327119	0.0247806	1.01732	3.6569e-09	8.02544e-07	7.65453e-06	ZNF462
ENSG00000171631.14	-0.047883	0.0225312	1.01574	4.45547e-09	9.55914e-07	7.65453e-06	P2RY6
ENSG00000173585.15	0.854308	-0.0237598	0.983666	6.88797e-09	1.38348e-06	7.65453e-06	CCR9
ENSG00000174946.6	4.1524	0.0151401	1.01055	5.57009e-09	1.15885e-06	7.65453e-06	GPR171
ENSG00000175544.13	0.626671	-0.0204648	0.985915	3.67451e-09	8.06003e-07	7.65453e-06	CABP4
ENSG00000182749.5	3.1504	-0.0139862	0.990352	4.00091e-09	8.69466e-07	7.65453e-06	PAQR7
ENSG00000197965.11	6.74499	-0.0194494	0.986609	4.69351e-09	1.00031e-06	7.65453e-06	MPZL1
ENSG00000227240.1	-1.2948	0.021032	1.01469	7.15944e-09	1.42783e-06	7.65453e-06
ENSG00000233937.6	2.65961	0.00943169	1.00656	6.64005e-09	1.34241e-06	7.65453e-06	CTC-338M12.4
ENSG00000238015.2	-0.390118	0.0288967	1.02023	5.71577e-09	1.18447e-06	7.65453e-06
ENSG00000114948.12	2.71168	0.0277963	1.01945	8.35494e-09	1.6401e-06	1.53131e-05	ADAM23
ENSG00000196159.11	2.28955	-0.0255684	0.982433	7.18852e-09	1.43255e-06	1.53131e-05	FAT4
ENSG00000270562.1	3.68048	-0.0110002	0.992404	8.40905e-09	1.64957e-06	1.53131e-05	FOXP1-DT
ENSG00000010319.6	0.421554	0.0207421	1.01448	1.1727e-08	2.21422e-06	1.67624e-05	SEMA3G
ENSG00000035681.7	6.3359	0.00559308	1.00388	9.47893e-09	1.83625e-06	1.67624e-05	NSMAF
ENSG00000143889.15	5.96463	0.00902502	1.00628	8.51337e-09	1.66781e-06	1.67624e-05	HNRNPLL
ENSG00000154856.12	0.155607	0.0229099	1.01601	1.14348e-08	2.16617e-06	1.67624e-05	APCDD1
ENSG00000157800.17	5.61712	0.012679	1.00883	1.01073e-08	1.94385e-06	1.67624e-05	SLC37A3
ENSG00000158813.17	1.90496	0.0235557	1.01646	9.99097e-09	1.92405e-06	1.67624e-05	EDA
ENSG00000175556.16	3.84537	0.00934137	1.0065	1.16145e-08	2.19575e-06	1.67624e-05	LONRF3
ENSG00000226057.6	-0.520597	0.0228448	1.01596	1.22866e-08	2.30535e-06	1.67624e-05	PHF2P2
ENSG00000258227.6	2.58213	0.0201956	1.0141	1.26322e-08	2.36106e-06	1.67624e-05	CLEC5A
ENSG00000132274.15	8.83229	0.0129346	1.00901	1.5193e-08	2.7631e-06	1.7322e-05	TRIM22
ENSG00000158966.13	0.332169	-0.0233822	0.983923	1.28641e-08	2.39819e-06	1.7322e-05	CACHD1
ENSG00000164949.7	-1.16622	-0.0188606	0.987012	1.3866e-08	2.55741e-06	1.7322e-05	GEM
ENSG00000184226.14	5.16745	-0.0298452	0.979525	1.46426e-08	2.67849e-06	1.7322e-05	PCDH9
ENSG00000214788.2	-1.16564	0.0206423	1.01441	1.45209e-08	2.65964e-06	1.7322e-05
ENSG00000076641.4	8.38154	0.00750517	1.00522	2.39793e-08	4.15394e-06	3.25937e-05	PAG1
ENSG00000104447.12	6.65916	0.00678358	1.00471	2.14799e-08	3.77107e-06	3.25937e-05	TRPS1
ENSG00000107954.10	2.94802	-0.0193982	0.986644	2.41476e-08	4.17935e-06	3.25937e-05	NEURL1
ENSG00000113368.11	5.77646	0.0151033	1.01052	1.87596e-08	3.34245e-06	3.25937e-05	LMNB1
ENSG00000146373.16	3.70121	0.0127756	1.00889	1.80651e-08	3.23098e-06	3.25937e-05	RNF217
ENSG00000158089.14	2.52164	0.0261701	1.01831	1.81619e-08	3.24657e-06	3.25937e-05	GALNT14
ENSG00000162949.16	-1.03895	0.0218246	1.01524	2.39321e-08	4.14681e-06	3.25937e-05	CAPN13
ENSG00000180875.4	-0.0455097	0.0242242	1.01693	1.53618e-08	2.78887e-06	3.25937e-05	GREM2
ENSG00000197992.6	1.02665	-0.022667	0.984411	2.18646e-08	3.83067e-06	3.25937e-05	CLEC9A
ENSG00000215223.3	-0.842201	0.0202292	1.01412	2.33781e-08	4.06278e-06	3.25937e-05	CYP51A1P3
ENSG00000078589.12	5.38603	-0.0105414	0.99272	3.30343e-08	5.49023e-06	3.75585e-05	P2RY10
ENSG00000110079.16	2.4596	0.019084	1.01332	3.77454e-08	6.1451e-06	3.75585e-05	MS4A4A
ENSG00000120217.13	4.33388	0.0201732	1.01408	3.26681e-08	5.43818e-06	3.75585e-05	CD274
ENSG00000134326.11	4.98214	0.0280902	1.01966	3.46031e-08	5.71131e-06	3.75585e-05	CMPK2
ENSG00000138496.16	7.5563	0.0152997	1.01066	3.58393e-08	5.88339e-06	3.75585e-05	PARP9
ENSG00000139572.3	0.299877	0.0220128	1.01538	2.70254e-08	4.61425e-06	3.75585e-05	GPR84
ENSG00000162630.5	1.20522	0.0272181	1.01905	3.42982e-08	5.66858e-06	3.75585e-05	B3GALT2
ENSG00000163220.10	11.4953	0.0177545	1.01238	3.44549e-08	5.69056e-06	3.75585e-05	S100A9
ENSG00000175779.1	0.713681	0.0197147	1.01376	2.47616e-08	4.2717e-06	3.75585e-05	LINC02694
ENSG00000228168.1	0.692141	0.0223624	1.01562	3.60774e-08	5.91632e-06	3.75585e-05	HNRNPA1P21
ENSG00000257743.8	4.52031	0.0242164	1.01693	2.65344e-08	4.54057e-06	3.75585e-05	MGAM2
ENSG00000272602.5	3.20826	-0.0185628	0.987216	3.20315e-08	5.34729e-06	3.75585e-05	ZNF595
ENSG00000145365.10	4.74741	0.0111327	1.00775	4.55379e-08	7.18407e-06	3.96847e-05	TIFA
ENSG00000150347.14	6.26045	0.00828249	1.00576	4.60757e-08	7.2534e-06	3.96847e-05	ARID5B
ENSG00000173391.8	0.35095	0.0328352	1.02302	3.77594e-08	6.14701e-06	3.96847e-05	OLR1
ENSG00000196636.7	2.20208	0.0106422	1.0074	4.38098e-08	6.95925e-06	3.96847e-05	SDHAF3
ENSG00000198948.11	5.26819	-0.0180022	0.987599	4.05621e-08	6.52822e-06	3.96847e-05	MFAP3L
ENSG00000219607.3	0.215458	-0.0224903	0.984532	4.50475e-08	7.12058e-06	3.96847e-05	PPP1R3G
ENSG00000233030.2	0.832193	0.0241544	1.01688	4.65775e-08	7.31783e-06	3.96847e-05
ENSG00000236467.8	-1.47792	-0.0149386	0.989699	4.41966e-08	7.00984e-06	3.96847e-05	KCNMA1-AS1
ENSG00000120306.9	4.63617	0.0180115	1.01256	5.09361e-08	7.90076e-06	5.4667e-05	CYSTM1
ENSG00000120833.13	3.66411	0.0115429	1.00803	4.69152e-08	7.36104e-06	5.4667e-05	SOCS2
ENSG00000130513.6	-1.62361	0.017631	1.0123	4.98932e-08	7.76196e-06	5.4667e-05	GDF15
ENSG00000134321.11	5.39279	0.0387063	1.02719	5.77179e-08	8.78366e-06	5.4667e-05	RSAD2
ENSG00000165092.12	4.71289	-0.0174316	0.98799	5.30783e-08	8.18328e-06	5.4667e-05	ALDH1A1
ENSG00000168405.15	5.15349	0.00733762	1.0051	5.44308e-08	8.35992e-06	5.4667e-05	CMAHP
ENSG00000169330.8	1.37489	0.0174868	1.01219	6.03657e-08	9.11939e-06	5.4667e-05	MINAR1
ENSG00000169385.2	3.06686	0.0241166	1.01686	6.30005e-08	9.44863e-06	5.4667e-05	RNASE2
ENSG00000183625.14	5.32642	-0.0211047	0.985478	5.62532e-08	8.59581e-06	5.4667e-05	CCR3
ENSG00000198216.10	3.59551	0.0228732	1.01598	6.23831e-08	9.37191e-06	5.4667e-05	CACNA1E
ENSG00000248863.2	2.08732	0.0114847	1.00799	6.3746e-08	9.54092e-06	5.4667e-05
ENSG00000157445.14	2.72651	-0.0140251	0.990326	6.42572e-08	9.604e-06	6.15082e-05	CACNA2D3
ENSG00000171658.8	-0.950787	0.0205974	1.01438	6.80543e-08	1.00785e-05	6.15082e-05	NMRAL2P
ENSG00000173825.6	2.92934	-0.0186648	0.987146	6.61809e-08	9.8455e-06	6.15082e-05	TIGD3
ENSG00000153823.18	3.76111	0.0156744	1.01092	6.95787e-08	1.02666e-05	7.22121e-05	PID1
ENSG00000081479.12	-1.61663	-0.0161115	0.988894	7.94493e-08	1.15448e-05	0.000102722	LRP2
ENSG00000096006.11	1.86523	0.0321457	1.02253	1.13504e-07	1.57352e-05	0.000102722	CRISP3
ENSG00000105011.8	2.47207	-0.0184125	0.987319	1.13336e-07	1.57155e-05	0.000102722	ASF1B
ENSG00000127311.9	7.29446	0.0069379	1.00482	7.46655e-08	1.09236e-05	0.000102722	HELB
ENSG00000127831.10	1.74655	-0.0252507	0.98265	1.00729e-07	1.42092e-05	0.000102722	VIL1
ENSG00000136810.12	4.67988	0.0141022	1.00982	9.91833e-08	1.40209e-05	0.000102722	TXN
ENSG00000145545.11	4.68168	0.00753565	1.00524	9.86903e-08	1.39607e-05	0.000102722	SRD5A1
ENSG00000155380.11	3.76474	0.00863357	1.006	8.98295e-08	1.28642e-05	0.000102722	SLC16A1
ENSG00000163050.16	5.98975	-0.0119927	0.991722	1.18106e-07	1.62721e-05	0.000102722	COQ8A
ENSG00000184602.5	7.2282	-0.0122603	0.991538	1.04709e-07	1.46903e-05	0.000102722	SNN
ENSG00000185112.5	3.70907	-0.0120808	0.991661	1.15542e-07	1.59738e-05	0.000102722	FAM43A
ENSG00000215386.11	-1.11681	-0.0203375	0.986002	9.38127e-08	1.33604e-05	0.000102722	MIR99AHG
ENSG00000223865.10	7.60616	-0.0110951	0.992339	1.0401e-07	1.46062e-05	0.000102722	HLA-DPB1
ENSG00000225783.6	7.75916	0.0145667	1.01015	1.20215e-07	1.6516e-05	0.000102722	MIAT
ENSG00000242110.7	0.948016	-0.0151801	0.989533	7.16613e-08	1.05291e-05	0.000102722	AMACR
ENSG00000254789.2	1.29428	0.0318478	1.02232	1.04437e-07	1.46576e-05	0.000102722
ENSG00000279447.1	3.08463	-0.0215608	0.985166	1.12854e-07	1.56588e-05	0.000102722
ENSG00000055208.18	7.37022	0.00586759	1.00408	1.89706e-07	2.41949e-05	0.000124313	TAB2
ENSG00000064886.13	3.53813	-0.0155595	0.989273	2.18529e-07	2.70704e-05	0.000124313	CHI3L2
ENSG00000079215.13	0.770316	0.0193697	1.01352	1.39089e-07	1.87109e-05	0.000124313	SLC1A3
ENSG00000099377.13	0.834823	0.0206814	1.01444	1.84179e-07	2.36239e-05	0.000124313	HSD3B7
ENSG00000100154.14	2.13532	-0.0190949	0.986852	2.1157e-07	2.63914e-05	0.000124313	TTC28
ENSG00000102524.11	6.61021	0.014642	1.0102	1.74496e-07	2.26078e-05	0.000124313	TNFSF13B
ENSG00000115904.12	6.70358	0.00661059	1.00459	1.4294e-07	1.91492e-05	0.000124313	SOS1
ENSG00000116044.15	6.79739	0.00682681	1.00474	1.58702e-07	2.09056e-05	0.000124313	NFE2L2
ENSG00000125482.12	4.63069	-0.00572917	0.996037	2.10915e-07	2.6327e-05	0.000124313	TTF1
ENSG00000132530.16	6.88334	0.0188042	1.01312	1.432e-07	1.91786e-05	0.000124313	XAF1
ENSG00000133169.5	-1.25109	0.0205163	1.01432	1.89096e-07	2.41321e-05	0.000124313	BEX1
ENSG00000135218.17	7.61712	0.0126056	1.00878	2.32233e-07	2.83805e-05	0.000124313	CD36
ENSG00000144554.10	4.92495	-0.00601455	0.99584	1.78723e-07	2.30539e-05	0.000124313	FANCD2
ENSG00000163633.10	1.27703	0.011449	1.00797	2.04987e-07	2.57403e-05	0.000124313	C4orf36
ENSG00000166428.12	3.22974	-0.017889	0.987677	2.00909e-07	2.53325e-05	0.000124313	PLD4
ENSG00000168615.11	4.82615	0.00972822	1.00677	2.21573e-07	2.73644e-05	0.000124313	ADAM9
ENSG00000171385.9	0.24322	-0.0230875	0.984124	1.71121e-07	2.22488e-05	0.000124313	KCND3
ENSG00000172493.20	7.69895	0.00887776	1.00617	2.35629e-07	2.86996e-05	0.000124313	AFF1
ENSG00000179869.14	3.88416	0.0310801	1.02178	2.3546e-07	2.86838e-05	0.000124313	ABCA13
ENSG00000183691.4	1.59108	-0.0301806	0.979298	2.25024e-07	2.76957e-05	0.000124313	NOG
ENSG00000185880.12	6.13001	0.0084815	1.0059	1.36629e-07	1.8429e-05	0.000124313	TRIM69
ENSG00000196123.12	1.7787	0.0130736	1.0091	1.22022e-07	1.67238e-05	0.000124313	MATCAP1
ENSG00000203780.10	0.293735	0.0183849	1.01282	2.03637e-07	2.56057e-05	0.000124313	FANK1
ENSG00000204397.7	5.03332	0.0131375	1.00915	1.63403e-07	2.14181e-05	0.000124313	CARD16
ENSG00000205837.7	-1.16937	0.02345	1.01639	1.73288e-07	2.24796e-05	0.000124313	LINC00487
ENSG00000239961.2	1.15272	-0.0219333	0.984912	2.20753e-07	2.72855e-05	0.000124313	LILRA4
ENSG00000240225.10	3.37401	-0.0115075	0.992055	2.38143e-07	2.89345e-05	0.000124313	ZNF542P
ENSG00000249309.1	2.12521	0.0200971	1.01403	1.85752e-07	2.37871e-05	0.000124313
ENSG00000254420.1	-1.66308	0.0148521	1.01035	1.91977e-07	2.44276e-05	0.000124313
ENSG00000254481.1	0.482701	-0.0207814	0.985699	2.36997e-07	2.88276e-05	0.000124313	PTP4A2P2
ENSG00000257322.5	0.293139	0.018252	1.01273	2.10363e-07	2.62726e-05	0.000124313
ENSG00000274173.1	1.40862	0.0317415	1.02225	1.60579e-07	2.11108e-05	0.000124313	LINC02967
ENSG00000280832.1	3.7882	0.0170617	1.0119	1.7605e-07	2.27722e-05	0.000124313	GSEC
ENSG00000023909.9	4.52624	0.0086283	1.006	2.55714e-07	3.06006e-05	0.000141749	GCLM
ENSG00000138646.8	5.58876	0.0255694	1.01788	2.73305e-07	3.2227e-05	0.000141749	HERC5
ENSG00000139364.10	-1.43142	-0.0169566	0.988315	2.77453e-07	3.26037e-05	0.000141749	TMEM132B
ENSG00000156206.13	1.22249	-0.0196029	0.986504	2.72781e-07	3.21792e-05	0.000141749	CFAP161
ENSG00000163430.11	2.83936	-0.0253254	0.982599	2.81342e-07	3.29544e-05	0.000141749	FSTL1
ENSG00000175894.14	-0.352562	-0.0260106	0.982132	2.70842e-07	3.20021e-05	0.000141749	TSPEAR
ENSG00000179918.18	4.65251	0.00629456	1.00437	2.40329e-07	2.91379e-05	0.000141749	SEPHS2
ENSG00000183621.15	5.13663	0.0123261	1.00858	2.84697e-07	3.32552e-05	0.000141749	ZNF438
ENSG00000196873.15	2.91961	0.0107381	1.00747	2.6661e-07	3.16136e-05	0.000141749	ZNG1C
ENSG00000211689.7	4.60896	-0.0168374	0.988397	2.46466e-07	2.97259e-05	0.000141749	TRGC1
ENSG00000226510.1	-1.86208	0.012279	1.00855	2.7506e-07	3.23867e-05	0.000141749	UPK1A-AS1
ENSG00000088827.12	2.24937	0.0353587	1.02481	4.35938e-07	4.84341e-05	0.000345952	SIGLEC1
ENSG00000097033.14	7.5798	0.00812134	1.00565	3.79515e-07	4.29435e-05	0.000345952	SH3GLB1
ENSG00000111331.12	5.98737	0.0281414	1.0197	3.08273e-07	3.57144e-05	0.000345952	OAS3
ENSG00000113615.12	5.03732	0.00558042	1.00388	3.89458e-07	4.39256e-05	0.000345952	SEC24A
ENSG00000136193.16	5.21493	-0.0106794	0.992625	4.05557e-07	4.55026e-05	0.000345952	SCRN1
ENSG00000162434.11	9.42696	-0.00750006	0.994815	2.85296e-07	3.33087e-05	0.000345952	JAK1
ENSG00000164116.16	3.49303	-0.0156355	0.989221	2.9687e-07	3.45251e-05	0.000345952	GUCY1A1
ENSG00000172936.12	6.89481	0.0115434	1.00803	4.23769e-07	4.72668e-05	0.000345952	MYD88
ENSG00000177409.11	7.95332	0.0155292	1.01082	4.19597e-07	4.68644e-05	0.000345952	SAMD9L
ENSG00000179542.15	2.66316	0.0151778	1.01058	3.65841e-07	4.15821e-05	0.000345952	SLITRK4
ENSG00000183762.12	4.71362	0.0249182	1.01742	3.97366e-07	4.47023e-05	0.000345952	KREMEN1
ENSG00000197448.13	7.18071	0.00595341	1.00414	4.31349e-07	4.79949e-05	0.000345952	GSTK1
ENSG00000211890.3	1.16811	0.0329376	1.02309	4.30568e-07	4.792e-05	0.000345952	IGHA2
ENSG00000215196.4	0.964137	0.0232428	1.01624	3.99929e-07	4.49531e-05	0.000345952	BASP1-AS1
ENSG00000224020.1	0.790698	-0.0196543	0.986469	3.78153e-07	4.28084e-05	0.000345952	MIR181A2HG
ENSG00000224610.1	-0.387858	-0.0253988	0.982549	3.18743e-07	3.67983e-05	0.000345952
ENSG00000066382.16	-0.608251	-0.0204248	0.985942	4.91818e-07	5.37635e-05	0.000386988	MPPED2
ENSG00000119686.9	4.02753	0.0113622	1.00791	4.84152e-07	5.30404e-05	0.000386988	FLVCR2
ENSG00000170271.10	6.55959	-0.0262852	0.981945	5.11124e-07	5.55709e-05	0.000386988	FAXDC2
ENSG00000173221.13	6.53126	0.00779288	1.00542	4.44928e-07	4.92905e-05	0.000386988	GLRX
ENSG00000226137.5	4.30901	-0.0139411	0.990383	4.92477e-07	5.38255e-05	0.000386988	BAIAP2-DT
ENSG00000283064.1	1.17179	0.0137148	1.00955	4.96683e-07	5.42208e-05	0.000386988	H2BC6-AS1
ENSG00000009694.13	4.45519	0.0167803	1.0117	7.50042e-07	7.65263e-05	0.000395972	TENM1
ENSG00000103528.16	1.83909	-0.0170884	0.988225	8.10477e-07	8.14244e-05	0.000395972	SYT17
ENSG00000105810.9	6.5779	0.00686918	1.00477	5.1189e-07	5.56422e-05	0.000395972	CDK6
ENSG00000110076.18	-0.486715	-0.018891	0.986991	8.9435e-07	8.79785e-05	0.000395972	NRXN2
ENSG00000112062.10	8.83741	0.0102399	1.00712	6.02323e-07	6.38862e-05	0.000395972	MAPK14
ENSG00000112182.14	5.77709	-0.0143277	0.990118	8.69456e-07	8.60619e-05	0.000395972	BACH2
ENSG00000117450.13	5.9204	0.00750249	1.00521	6.12119e-07	6.47554e-05	0.000395972	PRDX1
ENSG00000121236.20	-0.413015	0.0225893	1.01578	6.66177e-07	6.94708e-05	0.000395972	TRIM6
ENSG00000123685.8	1.2231	-0.0150515	0.989621	8.59918e-07	8.53213e-05	0.000395972	BATF3
ENSG00000126709.14	5.46609	0.0262119	1.01833	7.72419e-07	7.83575e-05	0.000395972	IFI6
ENSG00000126861.4	1.24384	0.0161768	1.01128	8.71727e-07	8.62378e-05	0.000395972	OMG
ENSG00000128266.8	3.97794	-0.0211098	0.985474	8.18517e-07	8.20648e-05	0.000395972	GNAZ
ENSG00000133106.14	5.78218	0.0225377	1.01574	8.48205e-07	8.44068e-05	0.000395972	EPSTI1
ENSG00000134851.12	6.55996	0.00673677	1.00468	8.44485e-07	8.41152e-05	0.000395972	TMEM165
ENSG00000134897.13	2.04418	0.0104886	1.0073	8.26746e-07	8.27175e-05	0.000395972	BIVM
ENSG00000135046.13	7.67944	0.0135354	1.00943	6.36906e-07	6.69343e-05	0.000395972	ANXA1
ENSG00000137628.16	6.63716	0.0157764	1.011	8.59609e-07	8.52971e-05	0.000395972	DDX60
ENSG00000157601.13	6.81776	0.0254354	1.01779	6.20791e-07	6.5521e-05	0.000395972	MX1
ENSG00000169826.7	6.41424	0.0066835	1.00464	7.70643e-07	7.8213e-05	0.000395972	CSGALNACT2
ENSG00000175984.14	1.92897	-0.0141589	0.990234	6.34225e-07	6.67e-05	0.000395972	DENND2C
ENSG00000177301.14	1.89596	0.0131104	1.00913	7.07006e-07	7.29442e-05	0.000395972	KCNA2
ENSG00000177800.2	-1.92073	-0.00716781	0.995044	6.29931e-07	6.63241e-05	0.000395972	TMEM78
ENSG00000179029.14	2.36559	0.00804126	1.00559	6.8995e-07	7.15022e-05	0.000395972	TMEM107
ENSG00000197467.13	0.868027	-0.0260624	0.982097	8.94347e-07	8.79783e-05	0.000395972	COL13A1
ENSG00000198771.10	8.31306	-0.00698301	0.995171	5.97719e-07	6.34762e-05	0.000395972	RCSD1
ENSG00000198796.6	0.269511	0.0277698	1.01943	7.01356e-07	7.24679e-05	0.000395972	ALPK2
ENSG00000204852.15	3.8573	-0.0113728	0.992148	5.9154e-07	6.29243e-05	0.000395972	TCTN1
ENSG00000228203.6	-0.0769518	0.018831	1.01314	7.12285e-07	7.33879e-05	0.000395972	GRASLND
ENSG00000237298.9	7.44929	0.00852337	1.00593	6.89273e-07	7.14447e-05	0.000395972	TTN-AS1
ENSG00000242574.8	6.76324	-0.00878952	0.993926	7.45607e-07	7.61607e-05	0.000395972	HLA-DMB
ENSG00000248334.6	3.42226	-0.0117465	0.991891	8.05662e-07	8.10397e-05	0.000395972	WHAMMP2
ENSG00000250274.1	0.49315	-0.0162126	0.988825	6.33728e-07	6.66565e-05	0.000395972
ENSG00000260564.1	-1.93498	0.0108027	1.00752	6.83445e-07	7.09489e-05	0.000395972
ENSG00000271141.1	2.20238	0.011854	1.00825	5.44094e-07	5.86244e-05	0.000395972
ENSG00000106789.12	3.92227	0.00990311	1.00689	9.18151e-07	8.98706e-05	0.000497844	CORO2A
ENSG00000120156.20	0.762872	-0.0281227	0.980696	9.7837e-07	9.46444e-05	0.000497844	TEK
ENSG00000134247.9	0.953895	0.0161434	1.01125	9.82026e-07	9.49307e-05	0.000497844	PTGFRN
ENSG00000143891.16	4.15385	0.0096172	1.00669	9.00153e-07	8.84219e-05	0.000497844	GALM
ENSG00000196569.11	1.94901	-0.015993	0.988976	9.90022e-07	9.55553e-05	0.000497844	LAMA2
ENSG00000238113.6	4.84527	0.0143417	1.00999	9.74785e-07	9.43634e-05	0.000497844	LINC01410
ENSG00000284543.1	-0.199524	-0.0198747	0.986318	9.89141e-07	9.54866e-05	0.000497844	LINC01226
ENSG00000041353.9	5.71392	-0.0130912	0.990967	1.02413e-06	9.82481e-05	0.000561205	RAB27B
ENSG00000049768.14	-0.146567	0.0193932	1.01353	1.13492e-06	0.000106853	0.000561205	FOXP3
ENSG00000102780.16	5.48124	0.00808254	1.00562	1.05459e-06	0.000100646	0.000561205	DGKH
ENSG00000123570.3	0.522365	-0.0142833	0.990148	1.00065e-06	9.63829e-05	0.000561205	RAB9B
ENSG00000136147.17	6.00749	0.0066275	1.0046	1.07199e-06	0.000102005	0.000561205	PHF11
ENSG00000143753.12	6.03878	0.00585804	1.00407	1.11354e-06	0.000105217	0.000561205	DEGS1
ENSG00000164488.11	-1.94228	-0.00847703	0.994141	1.16753e-06	0.000109325	0.000561205	DACT2
ENSG00000170955.9	-0.530278	0.0220701	1.01542	1.1573e-06	0.000108553	0.000561205	CAVIN3
ENSG00000185499.16	-1.20618	0.0158089	1.01102	1.14799e-06	0.000107847	0.000561205	MUC1
ENSG00000210082.2	7.90407	0.0181232	1.01264	1.17626e-06	0.000109982	0.000561205	MT-RNR2
ENSG00000233038.5	3.93707	-0.0170778	0.988232	1.05085e-06	0.000100353	0.000561205	PTPRN2-AS1
ENSG00000102878.16	0.0940095	0.0174971	1.0122	1.40304e-06	0.000127512	0.00073839	HSF4
ENSG00000132170.19	-0.413155	0.0180486	1.01259	1.28299e-06	0.000118351	0.00073839	PPARG
ENSG00000132357.13	4.35796	0.00964034	1.0067	1.34828e-06	0.000123367	0.00073839	CARD6
ENSG00000134248.13	4.69825	0.00725539	1.00504	1.47907e-06	0.000133176	0.00073839	LAMTOR5
ENSG00000134317.17	1.78983	-0.0156803	0.98919	1.36472e-06	0.000124618	0.00073839	GRHL1
ENSG00000139651.10	6.6728	-0.00430815	0.997018	1.49437e-06	0.000134303	0.00073839	ZNF740
ENSG00000145687.16	6.0447	-0.00625588	0.995673	1.42404e-06	0.000129087	0.00073839	SSBP2
ENSG00000159714.10	0.180041	-0.016637	0.988534	1.35339e-06	0.000123756	0.00073839	ZDHHC1
ENSG00000170571.11	7.90661	0.00815018	1.00567	1.22431e-06	0.000113771	0.00073839	EMB
ENSG00000176533.12	3.02026	-0.0138523	0.990444	1.20871e-06	0.000112543	0.00073839	GNG7
ENSG00000188649.12	2.64559	0.0140799	1.00981	1.4545e-06	0.000131358	0.00073839	CC2D2B
ENSG00000204923.3	2.88207	0.00700391	1.00487	1.35311e-06	0.000123735	0.00073839	FBXO48
ENSG00000232125.2	0.244002	-0.0203416	0.985999	1.33276e-06	0.000122182	0.00073839	DYTN
ENSG00000235531.9	1.81771	0.0194174	1.01355	1.17869e-06	0.000110165	0.00073839	MSC-AS1
ENSG00000265888.1	-1.48652	0.01568	1.01093	1.41493e-06	0.000128405	0.00073839	DSCAS
ENSG00000008083.13	7.11885	-0.00913364	0.993689	3.69803e-06	0.0002917	0.00142334	JARID2
ENSG00000010327.10	6.43935	0.0194317	1.01356	1.68804e-06	0.000149844	0.00142334	STAB1
ENSG00000012223.12	4.23152	0.030994	1.02172	3.28883e-06	0.000265442	0.00142334	LTF
ENSG00000023902.13	7.26474	-0.00779229	0.994613	2.12909e-06	0.000183935	0.00142334	PLEKHO1
ENSG00000102038.15	-0.775708	-0.0194522	0.986607	2.43853e-06	0.000206785	0.00142334	SMARCA1
ENSG00000106261.16	6.96966	0.00292735	1.00203	1.97932e-06	0.000172565	0.00142334	ZKSCAN1
ENSG00000108576.9	0.809755	-0.0195616	0.986532	3.30112e-06	0.000266248	0.00142334	SLC6A4
ENSG00000108924.13	0.594736	0.0160867	1.01121	2.17213e-06	0.000187164	0.00142334	HLF
ENSG00000115170.13	4.16027	0.00668347	1.00464	2.43302e-06	0.000206385	0.00142334	ACVR1
ENSG00000117091.9	8.03454	0.00715235	1.00497	2.25419e-06	0.000193275	0.00142334	CD48
ENSG00000121904.17	-1.6145	-0.0149933	0.989661	3.55169e-06	0.000282447	0.00142334	CSMD2
ENSG00000133063.15	2.61748	0.0152591	1.01063	2.01824e-06	0.00017554	0.00142334	CHIT1
ENSG00000134909.18	3.84465	-0.00928961	0.993582	3.30244e-06	0.000266335	0.00142334	ARHGAP32
ENSG00000135272.10	6.31053	0.00758352	1.00527	3.26151e-06	0.000263646	0.00142334	MDFIC
ENSG00000138642.14	5.05085	0.0109459	1.00762	3.50102e-06	0.000279208	0.00142334	HERC6
ENSG00000138821.12	4.52258	0.00860444	1.00598	2.49426e-06	0.00021081	0.00142334	SLC39A8
ENSG00000144724.19	0.0815272	-0.0220025	0.984865	1.66462e-06	0.000147981	0.00142334	PTPRG
ENSG00000148926.9	5.13997	0.018714	1.01306	3.64649e-06	0.000288459	0.00142334	ADM
ENSG00000150594.6	-0.720533	-0.0196622	0.986464	3.60872e-06	0.000286071	0.00142334	ADRA2A
ENSG00000151320.10	2.97493	-0.0200475	0.9862	2.38369e-06	0.000202797	0.00142334	AKAP6
ENSG00000155511.17	-1.79273	-0.0122386	0.991553	2.7123e-06	0.000226308	0.00142334	GRIA1
ENSG00000162909.17	7.73105	0.00562338	1.00391	2.71201e-06	0.000226288	0.00142334	CAPN2
ENSG00000164091.11	7.9678	-0.00511307	0.996462	3.11247e-06	0.000253746	0.00142334	WDR82
ENSG00000167104.11	-2.03312	-0.00572411	0.99604	2.92806e-06	0.00024126	0.00142334	BPIFB6
ENSG00000167283.7	5.74339	0.00829562	1.00577	3.17951e-06	0.000258219	0.00142334	ATP5MG
ENSG00000172572.6	1.68009	-0.0194091	0.986637	1.85061e-06	0.000162626	0.00142334	PDE3A
ENSG00000172915.18	3.57907	-0.0141024	0.990273	2.64083e-06	0.000221272	0.00142334	NBEA
ENSG00000174473.15	-0.77379	-0.0234039	0.983909	2.89855e-06	0.000239237	0.00142334	GALNTL6
ENSG00000180284.5	-1.43292	-0.0162639	0.98879	2.55139e-06	0.00021491	0.00142334	CNEP1R1P1
ENSG00000184557.4	5.47108	0.0165612	1.01155	2.94249e-06	0.000242246	0.00142334	SOCS3
ENSG00000184900.15	3.93474	0.00694473	1.00483	3.72551e-06	0.000293421	0.00142334	SUMO3
ENSG00000185483.11	-0.74361	-0.0241233	0.983418	3.61984e-06	0.000286775	0.00142334	ROR1
ENSG00000185745.9	5.6515	0.0320378	1.02246	1.9886e-06	0.000173275	0.00142334	IFIT1
ENSG00000189319.13	6.85903	-0.00957534	0.993385	2.11187e-06	0.000182639	0.00142334	FAM53B
ENSG00000198795.10	0.23003	-0.0171683	0.98817	2.19647e-06	0.000188983	0.00142334	ZNF521
ENSG00000198833.6	7.0976	0.00887296	1.00617	1.86006e-06	0.000163361	0.00142334	UBE2J1
ENSG00000211891.5	-0.459115	0.0237461	1.0166	2.5309e-06	0.000213442	0.00142334	IGHE
ENSG00000214279.13	3.57081	-0.0166224	0.988544	2.11299e-06	0.000182723	0.00142334	SCART1
ENSG00000224789.1	0.255652	0.0201045	1.01403	1.4981e-06	0.000134578	0.00142334
ENSG00000226321.5	-0.324965	-0.0187254	0.987104	2.31901e-06	0.000198059	0.00142334	CROCC2
ENSG00000229677.1	2.68035	0.010609	1.00738	3.32284e-06	0.000267671	0.00142334	RPL17P28
ENSG00000234332.1	-1.02974	0.0171266	1.01194	2.577e-06	0.000216739	0.00142334	BCAS2P2
ENSG00000237135.1	2.59814	0.0152836	1.01065	3.17285e-06	0.000257777	0.00142334	DDX10P1
ENSG00000242550.5	0.694777	0.0275886	1.01931	3.25379e-06	0.000263137	0.00142334	SERPINB10
ENSG00000250011.1	0.836309	0.0123254	1.00858	2.34207e-06	0.000199753	0.00142334	HMGB1P3
ENSG00000253250.2	1.03513	0.015035	1.01048	3.39916e-06	0.000272641	0.00142334	C8orf88
ENSG00000255398.2	5.19267	0.015897	1.01108	2.99096e-06	0.000245548	0.00142334	HCAR3
ENSG00000259056.1	-1.21258	-0.0197041	0.986435	2.25789e-06	0.000193549	0.00142334	DUXAP1
ENSG00000259330.2	5.58896	-0.0083686	0.994216	3.38377e-06	0.000271642	0.00142334	INAFM2
ENSG00000259483.1	-0.306469	-0.0189967	0.986919	1.81667e-06	0.000159978	0.00142334
ENSG00000260035.1	-1.49155	0.0161925	1.01129	3.6448e-06	0.000288352	0.00142334
ENSG00000264204.2	1.09815	-0.0216963	0.985074	1.55101e-06	0.000138866	0.00142334	AGAP7P
ENSG00000270490.1	-1.99777	-0.006783	0.995309	1.99439e-06	0.000173718	0.00142334
ENSG00000279598.1	5.02204	0.00990573	1.00689	3.50685e-06	0.000279582	0.00142334
ENSG00000282988.1	2.51561	0.0166942	1.01164	3.65409e-06	0.000288938	0.00142334
ENSG00000025293.16	6.93309	-0.00366376	0.997464	4.95127e-06	0.000370255	0.00182655	PHF20
ENSG00000070526.14	0.990433	0.02092	1.01461	3.99965e-06	0.000311219	0.00182655	ST6GALNAC1
ENSG00000078747.14	7.85293	-0.00450253	0.996884	5.05498e-06	0.000376413	0.00182655	ITCH
ENSG00000103381.11	8.77405	-0.0120754	0.991665	4.49906e-06	0.000342785	0.00182655	CPPED1
ENSG00000115267.5	5.98542	0.0118258	1.00823	4.49636e-06	0.000342618	0.00182655	IFIH1
ENSG00000116793.15	5.45272	0.0079477	1.00552	4.71339e-06	0.000355933	0.00182655	PHTF1
ENSG00000118515.11	7.00464	-0.0100071	0.993088	4.65464e-06	0.000352353	0.00182655	SGK1
ENSG00000119537.15	4.33516	0.00652325	1.00453	3.89926e-06	0.00030471	0.00182655	KDSR
ENSG00000124205.15	-1.27959	0.0168259	1.01173	4.69888e-06	0.000355051	0.00182655	EDN3
ENSG00000141580.15	5.71632	-0.00451585	0.996875	4.44341e-06	0.000339333	0.00182655	WDR45B
ENSG00000147408.14	5.62185	0.0107763	1.0075	5.51254e-06	0.000402967	0.00182655	CSGALNACT1
ENSG00000152778.8	5.90395	0.0154227	1.01075	4.25055e-06	0.000327243	0.00182655	IFIT5
ENSG00000154589.6	3.74546	0.0147405	1.01027	4.64123e-06	0.000351533	0.00182655	LY96
ENSG00000157193.15	4.01604	0.00613449	1.00426	5.45192e-06	0.000399505	0.00182655	LRP8
ENSG00000158481.12	3.06301	-0.0126555	0.991266	5.42974e-06	0.000398234	0.00182655	CD1C
ENSG00000163737.3	5.93263	-0.0196798	0.986452	4.63237e-06	0.000350991	0.00182655	PF4
ENSG00000163950.12	5.44549	-0.0057335	0.996034	4.05049e-06	0.000314493	0.00182655	SLBP
ENSG00000164047.4	3.73243	0.0250171	1.01749	3.75573e-06	0.000295307	0.00182655	CAMP
ENSG00000166033.11	-0.424064	0.0190834	1.01332	5.23693e-06	0.00038709	0.00182655	HTRA1
ENSG00000168234.12	6.32172	0.00685316	1.00476	4.19148e-06	0.000323501	0.00182655	TTC39C
ENSG00000168528.11	-0.0628544	0.0208328	1.01454	5.37282e-06	0.000394963	0.00182655	SERINC2
ENSG00000169567.11	5.29264	0.012183	1.00848	5.13366e-06	0.000381049	0.00182655	HINT1
ENSG00000169862.18	-1.83075	-0.0123811	0.991455	4.29084e-06	0.000329785	0.00182655	CTNND2
ENSG00000184828.9	-1.28352	-0.0156627	0.989202	5.3947e-06	0.000396222	0.00182655	ZBTB7C
ENSG00000198892.6	2.05811	-0.0279582	0.980807	3.86042e-06	0.000302177	0.00182655	SHISA4
ENSG00000204936.9	1.28575	0.0389473	1.02736	4.85943e-06	0.000364759	0.00182655	CD177
ENSG00000218730.1	1.23344	-0.0200577	0.986193	4.96868e-06	0.000371293	0.00182655
ENSG00000221866.9	3.11254	0.0161082	1.01123	5.10018e-06	0.00037908	0.00182655	PLXNA4
ENSG00000253214.1	0.456049	0.0183767	1.01282	4.46696e-06	0.000340796	0.00182655
ENSG00000254288.1	0.245697	0.0179253	1.0125	4.91907e-06	0.000368333	0.00182655
ENSG00000254802.1	0.407104	0.0150449	1.01048	4.08554e-06	0.000316742	0.00182655
ENSG00000255833.1	0.812277	-0.0157574	0.989137	4.94279e-06	0.00036975	0.00182655	TIFAB
ENSG00000267711.1	-0.594716	0.0163707	1.01141	5.42508e-06	0.000397967	0.00182655
ENSG00000272168.6	-0.25803	-0.0157541	0.989139	5.03844e-06	0.000375434	0.00182655	CASC15
ENSG00000086065.13	4.45121	0.0127953	1.00891	6.19003e-06	0.000444688	0.00290621	CHMP5
ENSG00000126858.16	6.35577	0.00726854	1.00505	5.92124e-06	0.000428224	0.00290621	RHOT1
ENSG00000166527.7	4.57059	0.0165922	1.01157	6.33023e-06	0.000453189	0.00290621	CLEC4D
ENSG00000168079.16	-0.926582	-0.0182198	0.98745	5.54672e-06	0.000404912	0.00290621	SCARA5
ENSG00000172985.10	2.62102	-0.0167294	0.988471	6.26449e-06	0.000449211	0.00290621	SH3RF3
ENSG00000174123.10	4.93194	0.0105225	1.00732	6.66737e-06	0.000473394	0.00290621	TLR10
ENSG00000196126.11	7.47472	-0.0131545	0.990923	6.03851e-06	0.000435434	0.00290621	HLA-DRB1
ENSG00000197959.13	3.96855	-0.0122704	0.991531	6.6203e-06	0.000470593	0.00290621	DNM3
ENSG00000198574.5	3.94408	-0.0164241	0.98868	6.43409e-06	0.00045945	0.00290621	SH2D1B
ENSG00000198873.11	5.26113	-0.00777804	0.994623	5.69599e-06	0.000414256	0.00290621	GRK5
ENSG00000261253.2	0.859657	-0.0195215	0.98656	6.57181e-06	0.000467701	0.00290621
ENSG00000272563.1	-1.33099	0.0148853	1.01037	5.92205e-06	0.000428273	0.00290621
ENSG00000277511.1	0.0695656	0.0156165	1.01088	6.67516e-06	0.000473857	0.00290621
ENSG00000279361.1	2.52112	-0.00976299	0.993256	6.63497e-06	0.000471467	0.00290621
ENSG00000057657.15	5.57662	0.00774519	1.00538	6.92672e-06	0.00048886	0.00309338	PRDM1
ENSG00000112414.14	0.396881	-0.0168105	0.988415	7.28604e-06	0.000510038	0.00309338	ADGRG6
ENSG00000133048.12	6.2565	-0.0265226	0.981784	6.72009e-06	0.000476524	0.00309338	CHI3L1
ENSG00000135124.14	4.76725	0.00632937	1.0044	7.29812e-06	0.000510744	0.00309338	P2RX4
ENSG00000136068.14	5.90653	-0.0102482	0.992922	7.07087e-06	0.000497398	0.00309338	FLNB
ENSG00000149591.16	4.07144	-0.0182579	0.987424	7.0471e-06	0.000495994	0.00309338	TAGLN
ENSG00000204252.13	5.34177	-0.01433	0.990116	7.26318e-06	0.000508702	0.00309338	HLA-DOA
ENSG00000057019.15	1.28635	-0.0135986	0.990618	8.85113e-06	0.000600579	0.00347562	DCBLD2
ENSG00000065534.18	4.34142	-0.0170699	0.988238	8.88784e-06	0.000602638	0.00347562	MYLK
ENSG00000100207.18	7.12977	-0.00642053	0.99556	7.34457e-06	0.000513455	0.00347562	TCF20
ENSG00000101204.16	-1.95231	-0.0105187	0.992735	8.22343e-06	0.00056491	0.00347562	CHRNA4
ENSG00000110200.8	2.10108	0.00857494	1.00596	8.81443e-06	0.000598517	0.00347562	ANAPC15
ENSG00000112299.7	5.18637	0.0179497	1.01252	9.34405e-06	0.000627982	0.00347562	VNN1
ENSG00000113448.18	5.83329	0.00713564	1.00496	7.54918e-06	0.000525597	0.00347562	PDE4D
ENSG00000118520.14	3.03013	0.0231673	1.01619	7.75149e-06	0.000537504	0.00347562	ARG1
ENSG00000118640.10	4.14195	0.00845046	1.00587	7.9827e-06	0.000550995	0.00347562	VAMP8
ENSG00000121989.14	4.13456	0.00822823	1.00572	8.57798e-06	0.000585165	0.00347562	ACVR2A
ENSG00000134028.14	-0.681058	0.0167131	1.01165	9.14838e-06	0.000617167	0.00347562	ADAMDEC1
ENSG00000139514.12	4.38636	0.00953197	1.00663	8.30573e-06	0.000569637	0.00347562	SLC7A1
ENSG00000145075.11	-0.933541	-0.0120422	0.991688	8.08602e-06	0.000556983	0.00347562
ENSG00000145391.13	5.57871	0.00576005	1.004	8.64235e-06	0.000588812	0.00347562	SETD7
ENSG00000163412.12	8.02276	0.0083717	1.00582	9.17774e-06	0.000618795	0.00347562	EIF4E3
ENSG00000168497.4	6.23266	-0.0156099	0.989238	8.62548e-06	0.000587857	0.00347562	CAVIN2
ENSG00000177324.13	3.52483	-0.018246	0.987432	9.01242e-06	0.000609604	0.00347562	BEND2
ENSG00000177694.15	-0.64242	-0.0157532	0.98914	7.64537e-06	0.00053127	0.00347562	NAALADL2
ENSG00000179348.11	2.35675	-0.0316305	0.978314	9.04283e-06	0.000611299	0.00347562	GATA2
ENSG00000197208.5	5.66916	0.0135333	1.00942	7.48974e-06	0.00052208	0.00347562	SLC22A4
ENSG00000100902.10	3.34405	0.00595657	1.00414	1.03575e-05	0.000683974	0.00384702	PSMA6
ENSG00000107201.9	7.48136	0.011598	1.00807	1.03532e-05	0.000683741	0.00384702	RIGI
ENSG00000148459.15	2.5226	0.00800069	1.00556	9.34924e-06	0.000628268	0.00384702	PDSS1
ENSG00000164935.6	-1.43516	-0.0147309	0.989841	9.75606e-06	0.00065098	0.00384702	DCSTAMP
ENSG00000165309.13	0.494862	-0.018362	0.987353	1.01744e-05	0.000674003	0.00384702	ARMC3
ENSG00000184979.9	1.36565	0.0208028	1.01452	9.92102e-06	0.000660098	0.00384702	USP18
ENSG00000198270.12	4.87187	0.00671454	1.00467	9.46267e-06	0.000634633	0.00384702	TMEM116
ENSG00000198695.2	0.2217	-0.0212561	0.985374	9.99744e-06	0.000664305	0.00384702	MT-ND6
ENSG00000278869.1	2.71424	0.016956	1.01182	9.83099e-06	0.000655128	0.00384702
ENSG00000279095.1	1.40114	-0.013523	0.99067	1.02835e-05	0.000679951	0.00384702
ENSG00000005108.15	-0.0564177	-0.0272168	0.981312	1.3832e-05	0.000862184	0.00386128	THSD7A
ENSG00000018625.14	-1.71459	-0.0109489	0.992439	1.43889e-05	0.000888906	0.00386128	ATP1A2
ENSG00000077616.10	-1.17296	-0.017916	0.987658	1.27071e-05	0.000806717	0.00386128	NAALAD2
ENSG00000078804.12	2.41102	-0.0161761	0.98885	1.57816e-05	0.00095369	0.00386128	TP53INP2
ENSG00000099250.17	1.57935	0.0172397	1.01202	1.26975e-05	0.000806231	0.00386128	NRP1
ENSG00000100473.15	1.23042	0.0203585	1.01421	1.23083e-05	0.000786554	0.00386128	COCH
ENSG00000108239.8	3.64099	0.00974517	1.00678	1.52177e-05	0.000927804	0.00386128	TBC1D12
ENSG00000108861.8	5.78216	0.00790567	1.00549	1.64426e-05	0.000983463	0.00386128	DUSP3
ENSG00000115425.13	4.05581	0.00490204	1.0034	1.65956e-05	0.000990267	0.00386128	PECR
ENSG00000117791.15	-0.615088	0.0161591	1.01126	1.31129e-05	0.000826962	0.00386128	MTARC2
ENSG00000119013.8	2.9262	0.0142194	1.0099	1.4919e-05	0.000913903	0.00386128	NDUFB3
ENSG00000119711.12	4.07007	-0.00708546	0.995101	1.23598e-05	0.000789174	0.00386128	ALDH6A1
ENSG00000119771.14	0.340836	-0.0170522	0.98825	1.0791e-05	0.000707353	0.00386128	KLHL29
ENSG00000120949.14	3.84483	-0.012456	0.991403	1.64547e-05	0.000984001	0.00386128	TNFRSF8
ENSG00000121060.16	8.34062	0.0117473	1.00818	1.2904e-05	0.000816569	0.00386128	TRIM25
ENSG00000123080.10	2.0494	0.011062	1.0077	1.18095e-05	0.000760958	0.00386128	CDKN2C
ENSG00000123610.4	4.32644	0.0202029	1.0141	1.32485e-05	0.000833666	0.00386128	TNFAIP6
ENSG00000126733.20	-1.90555	-0.00852797	0.994106	1.35164e-05	0.000846827	0.00386128	DACH2
ENSG00000130147.15	1.18245	-0.0131779	0.990907	1.35928e-05	0.000850556	0.00386128	SH3BP4
ENSG00000130340.15	4.75561	-0.00743671	0.994859	1.19225e-05	0.000766798	0.00386128	SNX9
ENSG00000132906.17	4.2094	-0.00827644	0.99428	1.61203e-05	0.000969021	0.00386128	CASP9
ENSG00000133657.14	6.83642	0.00472063	1.00328	1.04587e-05	0.000689461	0.00386128	ATP13A3
ENSG00000138439.11	5.48988	-0.00738752	0.994892	1.1241e-05	0.000731263	0.00386128	FAM117B
ENSG00000138639.17	5.257	0.0100495	1.00699	1.52211e-05	0.00092796	0.00386128	ARHGAP24
ENSG00000138735.15	5.14771	-0.0145564	0.989961	1.26763e-05	0.000805169	0.00386128	PDE5A
ENSG00000143149.12	5.81794	-0.00595087	0.995884	1.31848e-05	0.000830516	0.00386128	ALDH9A1
ENSG00000143198.12	5.0714	0.00593164	1.00412	1.3904e-05	0.000865667	0.00386128	MGST3
ENSG00000143786.7	2.34656	-0.0122823	0.991523	1.58301e-05	0.000955897	0.00386128	CNIH3
ENSG00000146122.16	1.94591	-0.0324175	0.977781	1.34696e-05	0.000844533	0.00386128	DAAM2
ENSG00000147041.11	-1.32477	-0.0174649	0.987967	1.334e-05	0.000838172	0.00386128	SYTL5
ENSG00000151715.7	3.20457	0.0150426	1.01048	1.56907e-05	0.00094955	0.00386128	TMEM45B
ENSG00000152558.14	8.05978	0.00972947	1.00677	1.23327e-05	0.000787796	0.00386128	TMEM123
ENSG00000154027.18	3.58415	-0.0178022	0.987736	1.33693e-05	0.000839613	0.00386128	AK5
ENSG00000157542.9	-1.72545	-0.011328	0.992179	1.35761e-05	0.000849743	0.00386128	KCNJ6
ENSG00000159915.12	-0.565479	0.0163076	1.01137	1.64654e-05	0.00098448	0.00386128	ZNF233
ENSG00000161647.18	-0.360393	0.0153299	1.01068	1.13731e-05	0.000738218	0.00386128	MPP3
ENSG00000162433.14	0.225883	0.0150402	1.01048	1.49934e-05	0.000917376	0.00386128	AK4
ENSG00000162496.8	3.86884	-0.010079	0.993038	1.11827e-05	0.000728189	0.00386128	DHRS3
ENSG00000163328.13	6.89121	0.00708285	1.00492	1.46039e-05	0.000899095	0.00386128	GPR155
ENSG00000164402.13	2.67561	0.00958073	1.00666	1.58483e-05	0.000956724	0.00386128	SEPTIN8
ENSG00000165704.14	1.911	0.00981629	1.00683	1.50234e-05	0.000918775	0.00386128	HPRT1
ENSG00000171840.11	4.62537	-0.0169277	0.988335	1.50111e-05	0.000918203	0.00386128	NINJ2
ENSG00000177294.6	-0.134403	0.0192693	1.01345	1.63085e-05	0.000977474	0.00386128	FBXO39
ENSG00000178075.19	4.19365	-0.0146904	0.989869	1.3363e-05	0.000839301	0.00386128	GRAMD1C
ENSG00000179023.8	-1.34763	-0.0185034	0.987256	1.64663e-05	0.00098452	0.00386128	KLHDC7A
ENSG00000196639.6	-1.12083	0.0161459	1.01125	1.36589e-05	0.000853779	0.00386128	HRH1
ENSG00000197595.4	-1.89302	-0.00645016	0.995539	1.43551e-05	0.000887297	0.00386128	ATP11AUN
ENSG00000223855.1	1.01724	-0.0177084	0.9878	1.51806e-05	0.000926082	0.00386128	PDGFA-DT
ENSG00000223960.6	2.90618	0.00735604	1.00511	1.37995e-05	0.000860608	0.00386128	CHROMR
ENSG00000227497.1	-2.06343	-0.00364563	0.997476	1.49576e-05	0.000915708	0.00386128	PABPC1P6
ENSG00000241468.7	2.80842	0.00710208	1.00493	1.21034e-05	0.000776089	0.00386128	ATP5MF
ENSG00000249859.9	4.24791	0.00944999	1.00657	1.54902e-05	0.00094037	0.00386128	PVT1
ENSG00000250138.4	1.01122	0.0263601	1.01844	1.66572e-05	0.000992998	0.00386128
ENSG00000260228.5	1.20321	-0.0118693	0.991807	1.48553e-05	0.000910922	0.00386128	CDH13-AS2
ENSG00000272914.1	1.03634	0.0142593	1.00993	1.29285e-05	0.000817795	0.00386128
ENSG00000280017.1	-1.08096	0.0163037	1.01136	1.5219e-05	0.000927864	0.00386128
ENSG00000087589.16	6.05908	-0.0102981	0.992887	1.87195e-05	0.00108758	0.00473365	CASS4
ENSG00000090402.7	-2.00803	-0.00524305	0.996372	1.99069e-05	0.00113995	0.00473365	SI
ENSG00000094963.13	-1.87772	-0.00846952	0.994147	1.94747e-05	0.00112106	0.00473365	FMO2
ENSG00000102900.12	5.42314	-0.00551571	0.996184	2.07663e-05	0.00117693	0.00473365	NUP93
ENSG00000104611.11	-1.1863	0.0148788	1.01037	2.07776e-05	0.00117741	0.00473365	SH2D4A
ENSG00000107290.13	9.64541	-0.00493472	0.996585	2.07382e-05	0.00117573	0.00473365	SETX
ENSG00000108001.13	-1.91853	-0.00825904	0.994292	2.04686e-05	0.0011642	0.00473365	EBF3
ENSG00000111335.12	6.78369	0.0139554	1.00972	1.89813e-05	0.00109925	0.00473365	OAS2
ENSG00000111490.12	2.83782	-0.0114068	0.992125	1.95e-05	0.00112217	0.00473365	TBC1D30
ENSG00000113520.10	-1.16454	-0.0184426	0.987298	2.04839e-05	0.00116486	0.00473365	IL4
ENSG00000113712.17	6.69637	0.00352783	1.00245	1.77094e-05	0.00104181	0.00473365	CSNK1A1
ENSG00000113924.11	2.15467	-0.0114683	0.992082	1.8089e-05	0.00105914	0.00473365	HGD
ENSG00000121417.13	5.25855	-0.00451224	0.996877	1.77125e-05	0.00104195	0.00473365	ZNF211
ENSG00000121594.11	1.32886	0.0149591	1.01042	1.66946e-05	0.000994653	0.00473365	CD80
ENSG00000121807.5	7.34348	0.00931215	1.00648	1.75725e-05	0.00103552	0.00473365	CCR2
ENSG00000127955.15	0.213295	-0.0144433	0.990039	1.7295e-05	0.00102269	0.00473365	GNAI1
ENSG00000135919.12	0.568049	-0.0169578	0.988315	2.07529e-05	0.00117635	0.00473365	SERPINE2
ENSG00000136689.18	4.92117	0.0127575	1.00888	1.93684e-05	0.00111638	0.00473365	IL1RN
ENSG00000136854.19	1.45004	0.013357	1.0093	1.72513e-05	0.00102067	0.00473365	STXBP1
ENSG00000141664.9	6.61196	0.0111215	1.00774	1.89706e-05	0.00109878	0.00473365	ZCCHC2
ENSG00000143452.15	2.46137	0.0147838	1.0103	1.78513e-05	0.00104831	0.00473365	HORMAD1
ENSG00000168297.15	5.74448	0.00676177	1.0047	2.07578e-05	0.00117656	0.00473365	PXK
ENSG00000180155.19	1.26871	-0.017724	0.98779	1.99989e-05	0.00114394	0.00473365	LYNX1
ENSG00000198894.7	4.29204	-0.00496297	0.996566	2.01475e-05	0.00115038	0.00473365	CIPC
ENSG00000228495.1	0.36507	-0.0249061	0.982885	2.07078e-05	0.00117443	0.00473365	LINC01013
ENSG00000238201.1	0.553108	-0.019209	0.986774	1.98525e-05	0.00113758	0.00473365
ENSG00000243650.3	3.22042	0.00791834	1.0055	2.04651e-05	0.00116405	0.00473365	RN7SL834P
ENSG00000250510.7	2.34441	-0.0175654	0.987898	1.82768e-05	0.00106766	0.00473365	GPR162
ENSG00000265158.1	-1.99496	-0.00548085	0.996208	1.74332e-05	0.00102909	0.00473365	LRRC37A7P
ENSG00000280011.1	-1.53359	-0.0146196	0.989918	1.94898e-05	0.00112173	0.00473365
ENSG00000008517.16	4.29499	0.0116626	1.00812	2.19359e-05	0.00123111	0.00680214	IL32
ENSG00000068024.16	7.03755	0.00897702	1.00624	2.22141e-05	0.00124387	0.00680214	HDAC4
ENSG00000111450.13	4.2478	0.0093443	1.0065	2.16194e-05	0.00121652	0.00680214	STX2
ENSG00000136504.11	7.14169	-0.00450273	0.996884	2.28464e-05	0.00127265	0.00680214	KAT7
ENSG00000136875.12	4.84664	-0.00514275	0.996442	2.20551e-05	0.00123658	0.00680214	PRPF4
ENSG00000166165.12	1.44906	-0.0162097	0.988827	2.29539e-05	0.00127751	0.00680214	CKB
ENSG00000166797.10	4.41504	0.00822247	1.00572	2.24815e-05	0.00125608	0.00680214	CIAO2A
ENSG00000174749.5	3.31019	0.00761981	1.0053	2.27e-05	0.00126601	0.00680214	FAM241A
ENSG00000181016.9	3.39055	0.0125085	1.00871	2.079e-05	0.00117794	0.00680214	LSMEM1
ENSG00000213949.8	3.40775	0.0134208	1.00935	2.15199e-05	0.00121192	0.00680214	ITGA1
ENSG00000225964.5	1.41171	0.0196979	1.01375	2.21817e-05	0.00124238	0.00680214	NRIR
ENSG00000278090.1	1.19471	-0.017383	0.988023	2.21656e-05	0.00124165	0.00680214	LUNAR1
ENSG00000085733.15	4.18809	-0.0185699	0.987211	2.50747e-05	0.00137371	0.00749365	CTTN
ENSG00000100297.15	5.57566	-0.00781145	0.9946	2.36253e-05	0.00130817	0.00749365	MCM5
ENSG00000104043.14	6.00783	0.0089994	1.00626	2.31441e-05	0.00128609	0.00749365	ATP8B4
ENSG00000111144.9	8.279	0.008943	1.00622	2.80148e-05	0.00150249	0.00749365	LTA4H
ENSG00000116717.11	2.82119	0.0111838	1.00778	2.56828e-05	0.0014008	0.00749365	GADD45A
ENSG00000120265.16	5.56885	0.00663542	1.00461	2.53602e-05	0.00138646	0.00749365	PCMT1
ENSG00000129354.11	-0.0231428	-0.0178455	0.987707	2.84532e-05	0.00152123	0.00749365	AP1M2
ENSG00000137752.23	7.53136	0.00797934	1.00555	2.82758e-05	0.00151366	0.00749365	CASP1
ENSG00000137996.12	5.20985	0.0036193	1.00251	2.47191e-05	0.00135776	0.00749365	RTCA
ENSG00000140025.15	1.89493	-0.00833666	0.994238	2.5459e-05	0.00139086	0.00749365	EFCAB11
ENSG00000151743.10	4.30792	0.00759243	1.00528	2.59732e-05	0.00141365	0.00749365	AMN1
ENSG00000152102.17	6.42106	-0.0046574	0.996777	2.74979e-05	0.00148024	0.00749365	FAM168B
ENSG00000166450.12	-1.30127	-0.0152682	0.989473	2.81669e-05	0.00150901	0.00749365	PRTG
ENSG00000175352.10	0.676171	0.0161141	1.01123	2.38047e-05	0.00131636	0.00749365	NRIP3
ENSG00000182810.6	4.19971	-0.00655136	0.995469	2.67553e-05	0.00144799	0.00749365	DDX28
ENSG00000187955.11	-1.76913	-0.0109457	0.992442	2.8145e-05	0.00150807	0.00749365	COL14A1
ENSG00000211459.2	4.8013	0.0206986	1.01445	2.74819e-05	0.00147955	0.00749365	MT-RNR1
ENSG00000225830.12	6.31803	-0.00372211	0.997423	2.37647e-05	0.00131453	0.00749365	ERCC6
ENSG00000231123.1	-1.22693	0.0134573	1.00937	2.60804e-05	0.00141838	0.00749365	SPATA20P1
ENSG00000248651.1	-1.45707	0.014746	1.01027	2.59215e-05	0.00141136	0.00749365	GCSHP1
ENSG00000249042.5	-0.573044	0.0144726	1.01008	2.65659e-05	0.00143971	0.00749365	FAM151B-DT
ENSG00000254946.1	-1.84929	0.00843847	1.00587	2.76997e-05	0.00148895	0.00749365	LINC02751
ENSG00000263266.2	-1.27947	0.0155204	1.01082	2.72149e-05	0.00146799	0.00749365	RPS7P1
ENSG00000276141.4	2.92662	-0.00945974	0.993464	2.56721e-05	0.00140033	0.00749365	WHAMMP3
ENSG00000279652.1	-1.85475	-0.0086106	0.994049	2.65595e-05	0.00143943	0.00749365
ENSG00000038295.7	-1.90048	-0.00713004	0.99507	2.92221e-05	0.00155433	0.00804779	TLL1
ENSG00000130164.13	3.54252	0.0119642	1.00833	3.01774e-05	0.00159507	0.00804779	LDLR
ENSG00000132465.10	5.09971	0.0238657	1.01668	3.03226e-05	0.00160122	0.00804779	JCHAIN
ENSG00000150625.16	0.404993	-0.0261545	0.982034	2.85468e-05	0.00152521	0.00804779	GPM6A
ENSG00000182782.7	4.85203	0.0138672	1.00966	2.9633e-05	0.00157192	0.00804779	HCAR2
ENSG00000266401.1	0.837105	-0.016982	0.988298	3.02828e-05	0.00159953	0.00804779
ENSG00000267364.1	2.08194	0.0101733	1.00708	3.00926e-05	0.00159147	0.00804779
ENSG00000268074.1	-2.04564	0.00219956	1.00153	2.89745e-05	0.00154368	0.00804779	RPL22P5
ENSG00000070269.13	6.15188	0.00541365	1.00376	3.88986e-05	0.00194598	0.00815302	TMEM260
ENSG00000095464.9	-1.90479	-0.00691054	0.995221	3.12078e-05	0.00163855	0.00815302	PDE6C
ENSG00000101544.8	4.58485	0.00384687	1.00267	3.57114e-05	0.00182217	0.00815302	ADNP2
ENSG00000105855.9	1.53316	-0.030673	0.978964	3.19549e-05	0.00166975	0.00815302	ITGB8
ENSG00000108651.9	5.89938	-0.00402025	0.997217	3.38581e-05	0.00174788	0.00815302	UTP6
ENSG00000113231.13	0.253241	-0.0148177	0.989782	3.9256e-05	0.00195956	0.00815302	PDE8B
ENSG00000115944.14	5.79297	0.00490421	1.00341	3.39565e-05	0.00175186	0.00815302	COX7A2L
ENSG00000129116.17	2.65538	-0.0122908	0.991517	3.59776e-05	0.00183269	0.00815302	PALLD
ENSG00000131016.16	2.4155	-0.0314866	0.978412	3.91497e-05	0.00195552	0.00815302	AKAP12
ENSG00000138829.11	4.45008	0.0147978	1.01031	3.33012e-05	0.00172521	0.00815302	FBN2
ENSG00000140948.11	4.39006	-0.00572435	0.99604	3.17925e-05	0.00166299	0.00815302	ZCCHC14
ENSG00000141543.9	5.46008	-0.00662988	0.995415	3.3768e-05	0.00174422	0.00815302	EIF4A3
ENSG00000145362.17	-0.629196	-0.0212918	0.98535	3.25122e-05	0.00169282	0.00815302	ANK2
ENSG00000152766.5	1.69097	0.0212466	1.01484	3.36379e-05	0.00173893	0.00815302	ANKRD22
ENSG00000156735.10	4.61163	0.00613002	1.00426	3.6456e-05	0.00185153	0.00815302	BAG4
ENSG00000163959.9	-0.970983	0.014358	1.01	3.80557e-05	0.00191371	0.00815302	SLC51A
ENSG00000164104.11	5.73461	0.0107511	1.00748	3.61165e-05	0.00183817	0.00815302	HMGB2
ENSG00000170128.4	-0.728709	-0.0152261	0.989502	3.94998e-05	0.00196879	0.00815302	GPR25
ENSG00000175866.15	1.49016	-0.0149474	0.989693	3.71424e-05	0.00187836	0.00815302	BAIAP2
ENSG00000176293.19	1.53967	-0.0161329	0.98888	3.70196e-05	0.00187358	0.00815302	ZNF135
ENSG00000185650.9	6.27151	0.0083778	1.00582	3.74971e-05	0.00189213	0.00815302	ZFP36L1
ENSG00000187140.5	-1.98505	-0.00543065	0.996243	3.53126e-05	0.00180633	0.00815302	FOXD3
ENSG00000188487.11	-0.331959	0.0182598	1.01274	3.57593e-05	0.00182406	0.00815302	INSC
ENSG00000189221.9	0.861225	0.0292356	1.02047	3.77715e-05	0.00190275	0.00815302	MAOA
ENSG00000197054.11	2.19874	-0.00895854	0.99381	3.3369e-05	0.00172798	0.00815302	ZNF763
ENSG00000197747.8	5.22185	0.00688626	1.00478	3.38955e-05	0.00174939	0.00815302	S100A10
ENSG00000203900.2	-2.00926	-0.00485457	0.996641	3.93715e-05	0.00196393	0.00815302
ENSG00000224271.5	-2.03851	-0.00431483	0.997014	3.75478e-05	0.0018941	0.00815302	EPIC1
ENSG00000237854.3	2.73444	-0.0058001	0.995988	3.95283e-05	0.00196987	0.00815302	LINC00674
ENSG00000238241.1	-0.359896	-0.0205029	0.985889	3.39024e-05	0.00174967	0.00815302	CCR12P
ENSG00000251034.1	2.03783	-0.0115711	0.992012	3.91699e-05	0.00195629	0.00815302
ENSG00000253115.1	-0.759661	0.0149798	1.01044	3.50433e-05	0.00179558	0.00815302
ENSG00000255595.2	-1.2177	-0.0179297	0.987649	3.30057e-05	0.00171312	0.00815302	LINC02350
ENSG00000258869.1	-1.53751	-0.00940676	0.993501	3.76996e-05	0.00189997	0.00815302	LINC02312
ENSG00000259225.6	-0.136361	-0.0159775	0.988986	3.04035e-05	0.00160464	0.00815302	LINC02345
ENSG00000260220.6	-1.12171	-0.0159672	0.988993	3.3123e-05	0.00171792	0.00815302	CCDC187
ENSG00000261795.1	-1.94685	-0.00691328	0.99522	3.70345e-05	0.00187416	0.00815302
ENSG00000272694.1	-2.03518	-0.00485963	0.996637	3.45135e-05	0.00177435	0.00815302
ENSG00000277586.2	1.44853	0.0193936	1.01353	3.77152e-05	0.00190058	0.00815302	NEFL
ENSG00000058063.15	8.24513	0.00631474	1.00439	4.92318e-05	0.00233933	0.00992394	ATP11B
ENSG00000065618.18	-0.168563	0.0212839	1.01486	4.49461e-05	0.00218043	0.00992394	COL17A1
ENSG00000085563.14	4.4054	-0.0106256	0.992662	4.24635e-05	0.0020853	0.00992394	ABCB1
ENSG00000100320.22	0.526937	-0.0138157	0.990469	4.52238e-05	0.00219093	0.00992394	RBFOX2
ENSG00000106018.13	0.0709686	-0.0163729	0.988715	4.47306e-05	0.00217227	0.00992394	VIPR2
ENSG00000112706.11	-2.00784	-0.00476183	0.996705	4.13128e-05	0.00204041	0.00992394	IMPG1
ENSG00000114923.16	-0.10577	-0.0158862	0.989049	3.95734e-05	0.00197157	0.00992394	SLC4A3
ENSG00000117069.14	-1.84407	-0.00876454	0.993943	4.72248e-05	0.00226574	0.00992394	ST6GALNAC5
ENSG00000128268.11	1.84461	0.0151518	1.01056	5.00295e-05	0.00236819	0.00992394	MGAT3
ENSG00000132541.10	1.27247	0.0110496	1.00769	4.87685e-05	0.00232247	0.00992394	RIDA
ENSG00000134817.10	-1.99625	-0.00690525	0.995225	4.55783e-05	0.00220429	0.00992394	APLNR
ENSG00000140287.10	2.74648	-0.0340718	0.97666	4.79262e-05	0.00229162	0.00992394	HDC
ENSG00000143502.14	1.99585	0.0165647	1.01155	4.26379e-05	0.00209206	0.00992394	SUSD4
ENSG00000145103.12	-0.963192	0.0149228	1.0104	4.81838e-05	0.00230108	0.00992394	ILDR1
ENSG00000147394.18	5.50338	-0.012613	0.991295	4.96426e-05	0.00235422	0.00992394	ZNF185
ENSG00000155657.26	8.38011	-0.0129038	0.991096	4.43937e-05	0.00215947	0.00992394	TTN
ENSG00000162849.15	-0.776641	-0.0152672	0.989473	4.95101e-05	0.00234942	0.00992394	KIF26B
ENSG00000162946.21	5.82289	0.00920393	1.0064	4.33142e-05	0.00211816	0.00992394	DISC1
ENSG00000163492.14	4.91719	-0.0123292	0.99149	4.30995e-05	0.00210989	0.00992394	CCDC141
ENSG00000164105.3	3.03313	0.00902545	1.00628	4.70285e-05	0.00225846	0.00992394	SAP30
ENSG00000164398.12	3.7332	0.00988348	1.00687	4.03394e-05	0.00200204	0.00992394	ACSL6
ENSG00000165795.23	2.51634	-0.00964778	0.993335	4.48212e-05	0.0021757	0.00992394	NDRG2
ENSG00000168268.10	0.613497	0.0145409	1.01013	4.18741e-05	0.00206237	0.00992394	NT5DC2
ENSG00000172296.12	0.472069	-0.015743	0.989147	4.12823e-05	0.00203921	0.00992394	SPTLC3
ENSG00000180758.11	2.78852	-0.00964977	0.993334	4.60771e-05	0.00222301	0.00992394	GPR157
ENSG00000184752.12	4.17215	0.00643693	1.00447	4.11332e-05	0.00203336	0.00992394	NDUFA12
ENSG00000216588.8	-1.21186	-0.0148121	0.989786	4.64395e-05	0.00223655	0.00992394	IGSF23
ENSG00000222898.1	0.568511	0.0142812	1.00995	4.25852e-05	0.00209002	0.00992394	RN7SKP97
ENSG00000230453.9	-1.42664	0.0137327	1.00956	4.13011e-05	0.00203995	0.00992394	ANKRD18B
ENSG00000231586.2	-1.84884	0.00720856	1.00501	4.74136e-05	0.00227272	0.00992394	RPS23P9
ENSG00000238121.5	4.651	0.00765345	1.00532	4.24559e-05	0.00208501	0.00992394	LINC00426
ENSG00000242259.8	5.00364	-0.00312103	0.997839	4.80258e-05	0.00229528	0.00992394	C22orf39
ENSG00000249662.5	2.67357	-0.014612	0.989923	4.68291e-05	0.00225106	0.00992394	LINC02218
ENSG00000250305.8	-0.588874	0.0157523	1.01098	4.85847e-05	0.00231576	0.00992394	TRMT9B
ENSG00000271270.5	1.85302	-0.00822313	0.994316	4.83395e-05	0.00230679	0.00992394	TMCC1-DT
ENSG00000274929.1	2.46987	0.0086279	1.006	4.65995e-05	0.00224252	0.00992394
ENSG00000283125.1	-1.55898	0.0142343	1.00992	4.7279e-05	0.00226774	0.00992394

## Sheet: e.DunedinPACE
Table S1e. Differentially Expressed Genes for the DunedinPACE Clock at FDR<.01
Ensemble Name	base mean	coefficient (log2)	coefficient (natural)	pvalue	qval	FDR-adjustedP	Gene Symbol
ENSG00000138772.12	5.11251	1.78703	3.45104	3.03514e-44	9.42747e-40	4.15222e-39	ANXA3
ENSG00000187554.11	5.14859	1.19504	2.28951	1.64031e-43	2.54748e-39	4.18031e-38	TLR5
ENSG00000029153.14	1.12133	1.27117	2.41358	1.50987e-42	1.56327e-38	4.23082e-37	BMAL2
ENSG00000091436.16	5.08296	0.842175	1.79275	1.51308e-41	1.17495e-37	3.41255e-35	MAP3K20
ENSG00000157168.18	3.03495	2.19199	4.56936	1.11379e-39	6.9191e-36	5.0048e-34	NRG1
ENSG00000118113.11	2.50128	2.76136	6.78036	1.72266e-38	8.91793e-35	4.58112e-33	MMP8
ENSG00000163221.8	5.97105	1.51782	2.86357	2.43603e-37	1.0042e-33	4.58112e-33	S100A12
ENSG00000265531.3	1.02995	1.95838	3.88625	3.12201e-37	1.21216e-33	9.31105e-33	FCGR1CP
ENSG00000163754.17	5.04977	0.6413	1.55973	6.11967e-37	2.11204e-33	6.51006e-31	GYG1
ENSG00000005302.17	6.3425	0.441428	1.35795	2.15709e-35	6.70015e-32	1.77893e-29	MSL3
ENSG00000096063.15	6.69324	0.792609	1.7322	5.94292e-34	1.67812e-30	3.52391e-29	SRPK1
ENSG00000143771.11	5.47588	0.500003	1.41422	4.6924e-33	1.10267e-29	7.55783e-29	CNIH4
ENSG00000198019.12	3.89499	1.42911	2.6928	1.7288e-33	4.47487e-30	7.55783e-29	FCGR1BP
ENSG00000134755.14	5.42124	1.50758	2.84334	1.56482e-32	3.22675e-29	2.64492e-28	DSC2
ENSG00000197006.13	7.165	0.768004	1.70291	6.59523e-33	1.46325e-29	2.64492e-28	METTL9
ENSG00000091129.19	0.378787	-2.0084	0.248548	3.35006e-31	5.51496e-28	3.37224e-27	NRCAM
ENSG00000154165.4	2.604	1.92097	3.78678	2.36257e-32	4.58649e-29	3.37224e-27	GPR15
ENSG00000183019.7	1.28847	1.40209	2.64283	3.20708e-31	5.31668e-28	3.37224e-27	MCEMP1
ENSG00000026508.17	8.65126	0.398098	1.31777	3.4933e-31	5.71082e-28	2.87968e-26	CD44
ENSG00000163171.7	7.58739	0.599346	1.51503	1.27643e-30	1.98237e-27	9.17705e-26	CDC42EP3
ENSG00000198734.10	6.29924	0.937518	1.91523	4.23095e-30	6.25799e-27	4.70926e-25	F5
ENSG00000078589.12	5.38299	-0.62746	0.647315	7.2956e-29	9.67554e-26	1.17096e-24	P2RY10
ENSG00000150337.13	3.66329	1.49954	2.82753	1.29621e-28	1.61538e-25	1.17096e-24	FCGR1A
ENSG00000206199.10	1.68745	-1.27973	0.411872	1.93922e-29	2.73792e-26	1.17096e-24	ANKUB1
ENSG00000157800.17	5.62057	0.724545	1.65238	1.32488e-28	1.64609e-25	2.86652e-24	SLC37A3
ENSG00000143546.9	8.26528	1.45044	2.73291	2.24775e-28	2.68529e-25	1.92572e-23	S100A8
ENSG00000006715.15	7.00774	-0.31607	0.803255	6.1819e-27	5.91715e-24	3.04133e-23	VPS41
ENSG00000023909.9	4.52885	0.5311	1.44503	5.97808e-27	5.759e-24	3.04133e-23	GCLM
ENSG00000112053.13	3.19339	1.3766	2.59656	4.03914e-27	4.14573e-24	3.04133e-23	SLC26A8
ENSG00000182389.19	4.02845	-1.20952	0.432413	8.44753e-28	9.71813e-25	3.04133e-23	CACNB4
ENSG00000183625.14	5.32046	-1.23808	0.423937	3.7212e-27	3.86084e-24	3.04133e-23	CCR3
ENSG00000198363.17	6.4962	0.818555	1.76364	5.99708e-27	5.77383e-24	3.04133e-23	ASPH
ENSG00000183762.12	4.72131	1.55732	2.94307	6.71963e-27	6.32481e-24	3.56018e-23	KREMEN1
ENSG00000151136.14	4.35824	-0.748127	0.595376	1.03202e-26	9.14078e-24	7.13345e-23	ABTB3
ENSG00000257017.8	1.42303	1.7794	3.43284	7.86581e-27	7.1859e-24	7.13345e-23	HP
ENSG00000171606.17	6.09314	-0.330738	0.795129	1.7835e-26	1.48105e-23	1.1892e-22	ZNF274
ENSG00000268170.2	2.73096	1.31682	2.49117	1.2459e-26	1.07497e-23	1.1892e-22
ENSG00000151012.13	1.90722	1.02594	2.03629	4.00924e-26	3.05002e-23	2.19282e-22	SLC7A11
ENSG00000173391.8	0.359873	1.87473	3.66732	2.01161e-26	1.64429e-23	2.19282e-22	OLR1
ENSG00000182749.5	3.14698	-0.743791	0.597168	3.25021e-26	2.53946e-23	2.19282e-22	PAQR7
ENSG00000179104.8	4.81365	0.525996	1.43993	4.12953e-26	3.12848e-23	2.80508e-21	TMTC2
ENSG00000122986.13	5.823	-0.588511	0.665029	1.31604e-25	9.73275e-23	5.01925e-21	HVCN1
ENSG00000092200.12	3.51289	-0.947095	0.518676	2.93197e-25	2.11791e-22	5.54372e-21	RPGRIP1
ENSG00000134851.12	6.56201	0.417202	1.33534	5.24654e-25	3.67889e-22	5.54372e-21	TMEM165
ENSG00000136810.12	4.6837	0.803764	1.74565	8.76694e-25	5.88534e-22	5.54372e-21	TXN
ENSG00000274173.1	1.41743	1.83918	3.57807	8.887e-25	5.95728e-22	5.54372e-21	LINC02967
ENSG00000146122.16	1.93433	-2.25196	0.209938	1.27968e-24	8.22632e-22	6.42113e-21	DAAM2
ENSG00000173825.6	2.92439	-1.04817	0.48358	1.00711e-24	6.65572e-22	6.42113e-21	TIGD3
ENSG00000179869.14	3.89285	1.80986	3.50607	2.24841e-24	1.38113e-21	1.64224e-20	ABCA13
ENSG00000223725.6	1.78786	-0.936067	0.522656	2.66044e-24	1.60943e-21	1.64224e-20
ENSG00000253250.2	1.04004	0.977923	1.96963	1.42056e-24	9.00493e-22	1.64224e-20	C8orf88
ENSG00000283646.1	0.920768	1.75454	3.3742	3.0067e-24	1.79599e-21	8.71494e-20	LINC02009
ENSG00000055732.12	0.350147	1.30889	2.47751	1.30512e-23	7.34138e-21	1.01326e-19	MCOLN3
ENSG00000113368.11	5.7801	0.793913	1.73377	1.59022e-23	8.80573e-21	1.01326e-19	LMNB1
ENSG00000124107.5	2.94142	1.46813	2.76664	1.8822e-23	1.02589e-20	1.01326e-19	SLPI
ENSG00000258819.1	4.23405	-1.40695	0.377107	5.81245e-24	3.40643e-21	1.01326e-19	LINC02289
ENSG00000128512.20	5.71011	1.10135	2.14555	1.88611e-23	1.0278e-20	1.54588e-19	DOCK4
ENSG00000135525.18	2.07743	-0.881338	0.542864	3.25425e-23	1.69175e-20	1.54588e-19	MAP7
ENSG00000158089.14	2.52788	1.36812	2.58134	2.52034e-23	1.34338e-20	1.54588e-19	GALNT14
ENSG00000164125.15	5.96172	0.778315	1.71513	3.37918e-23	1.74935e-20	4.44772e-19	GASK1B
ENSG00000198771.10	8.3111	-0.40796	0.753688	5.81229e-23	2.92607e-20	4.44772e-19	RCSD1
ENSG00000173914.11	4.00379	-0.310174	0.806545	9.85014e-23	4.78427e-20	5.74455e-19	RBM4B
ENSG00000198894.7	4.29031	-0.339037	0.790569	6.24303e-23	3.12766e-20	5.74455e-19	CIPC
ENSG00000011201.11	-1.22513	1.22333	2.33485	2.56496e-22	1.1899e-19	1.6508e-18	ANOS1
ENSG00000163220.10	11.4996	0.933977	1.91054	9.9419e-23	4.8251e-20	1.6508e-18	S100A9
ENSG00000280832.1	3.79259	0.938819	1.91696	2.5286e-22	1.17423e-19	1.6508e-18	GSEC
ENSG00000111145.7	4.72138	0.363999	1.28699	4.65352e-22	2.06942e-19	2.25246e-18	ELK3
ENSG00000146373.16	3.70413	0.649606	1.56874	3.88226e-22	1.75313e-19	2.25246e-18	RNF217
ENSG00000160179.18	5.43252	-1.02244	0.492284	2.5886e-22	1.20007e-19	2.25246e-18	ABCG1
ENSG00000112062.10	8.8402	0.585712	1.50078	4.76411e-22	2.11398e-19	1.17379e-17	MAPK14
ENSG00000165434.7	4.66723	0.649631	1.56877	1.21297e-21	5.23651e-19	1.17379e-17	PGM2L1
ENSG00000253276.2	4.92124	0.577903	1.49268	2.2789e-21	9.46706e-19	1.17379e-17	CCDC71L
ENSG00000257743.8	4.5258	1.2238	2.33562	2.12647e-21	8.88174e-19	1.17379e-17	MGAM2
ENSG00000279320.1	2.69015	0.984388	1.97847	1.34763e-21	5.78918e-19	1.17379e-17
ENSG00000068305.17	6.33576	0.397202	1.31695	3.45517e-21	1.40547e-18	2.48852e-17	MEF2A
ENSG00000184557.4	5.47592	0.993901	1.99156	2.36591e-21	9.79834e-19	2.48852e-17	SOCS3
ENSG00000132357.13	4.3606	0.55418	1.46833	5.92396e-21	2.3188e-18	2.58121e-17	CARD6
ENSG00000145354.9	4.9849	1.02689	2.03763	3.96824e-21	1.60075e-18	2.58121e-17	CISD2
ENSG00000243273.1	-0.756476	1.19427	2.28829	5.6262e-21	2.21224e-18	2.58121e-17
ENSG00000096006.11	1.87291	1.68293	3.21079	6.46128e-21	2.50868e-18	3.70786e-17	CRISP3
ENSG00000120217.13	4.33839	1.01026	2.01428	8.84874e-21	3.35185e-18	4.73418e-17	CD274
ENSG00000136875.12	4.84496	-0.333534	0.79359	1.32371e-20	4.84404e-18	4.73418e-17	PRPF4
ENSG00000183696.13	5.84342	0.422602	1.34034	1.28562e-20	4.71853e-18	4.73418e-17	UPP1
ENSG00000102900.12	5.42135	-0.356537	0.781037	1.34212e-20	4.90444e-18	5.18328e-17	NUP93
ENSG00000136193.16	5.21224	-0.578891	0.669478	1.69368e-20	6.03943e-18	5.18328e-17	SCRN1
ENSG00000139679.15	5.40222	0.990289	1.98658	1.85931e-20	6.55536e-18	5.18328e-17	LPAR6
ENSG00000204397.7	5.03647	0.689584	1.61282	1.5857e-20	5.69671e-18	5.18328e-17	CARD16
ENSG00000104447.12	6.66061	0.329404	1.25649	4.24775e-20	1.43915e-17	2.59535e-16	TRPS1
ENSG00000134333.13	6.50355	0.342336	1.26781	3.92641e-20	1.33589e-17	2.59535e-16	LDHA
ENSG00000249437.7	5.80931	1.03226	2.04523	2.00962e-20	7.01358e-18	2.59535e-16	NAIP
ENSG00000097033.14	7.58179	0.432041	1.34914	7.00427e-20	2.30972e-17	3.52336e-16	SH3GLB1
ENSG00000104219.12	6.78921	0.551605	1.46572	9.21383e-20	2.97678e-17	3.52336e-16	ZDHHC2
ENSG00000122641.10	-0.146357	1.42837	2.69142	8.36389e-20	2.72341e-17	3.52336e-16	INHBA
ENSG00000166527.7	4.57542	0.993667	1.99124	6.2705e-20	2.08205e-17	3.52336e-16	CLEC4D
ENSG00000234902.6	0.653458	-1.01609	0.494455	4.51631e-20	1.5248e-17	3.52336e-16
ENSG00000124172.9	7.07683	0.697993	1.62225	1.0188e-19	3.26237e-17	4.29043e-16	ATP5F1E
ENSG00000038427.15	10.5205	0.652091	1.57144	1.60931e-19	4.94955e-17	4.69476e-16	VCAN
ENSG00000171714.10	1.54868	1.009	2.01252	1.43358e-19	4.46041e-17	4.69476e-16	ANO5
ENSG00000197208.5	5.67311	0.811077	1.75452	1.15693e-19	3.66688e-17	4.69476e-16	SLC22A4
ENSG00000111666.10	6.37999	0.779528	1.71657	1.61036e-19	4.95244e-17	1.02675e-15	CHPT1
ENSG00000012223.12	4.23977	1.74495	3.35182	9.01296e-19	2.3977e-16	1.48837e-15	LTF
ENSG00000077684.15	6.6782	-0.243317	0.844801	6.85396e-19	1.89653e-16	1.48837e-15	JADE1
ENSG00000145365.10	4.74973	0.533394	1.44733	9.38744e-19	2.48072e-16	1.48837e-15	TIFA
ENSG00000145555.14	1.12348	1.07144	2.10153	7.23081e-19	1.98689e-16	1.48837e-15	MYO10
ENSG00000155962.12	3.53587	0.933888	1.91042	8.89501e-19	2.37132e-16	1.48837e-15	CLIC2
ENSG00000163050.16	5.9871	-0.596314	0.661442	6.06348e-19	1.70282e-16	1.48837e-15	COQ8A
ENSG00000163412.12	8.02517	0.498338	1.41259	4.58117e-19	1.32356e-16	1.48837e-15	EIF4E3
ENSG00000163877.10	5.11033	-0.233075	0.85082	8.20305e-19	2.21429e-16	1.48837e-15	SNIP1
ENSG00000164091.11	7.96644	-0.287368	0.819396	8.5166e-19	2.28593e-16	1.48837e-15	WDR82
ENSG00000168615.11	4.82842	0.501381	1.41557	1.94092e-19	5.91051e-17	1.48837e-15	ADAM9
ENSG00000169877.9	5.25931	1.57498	2.97931	9.06673e-19	2.40969e-16	1.48837e-15	AHSP
ENSG00000172995.16	-0.966339	-1.13675	0.454784	4.34836e-19	1.262e-16	1.48837e-15	ARPP21
ENSG00000183621.15	5.13951	0.63598	1.55399	3.75243e-19	1.10185e-16	1.48837e-15	ZNF438
ENSG00000215196.4	0.969651	1.21067	2.31445	4.8216e-19	1.38655e-16	1.48837e-15	BASP1-AS1
ENSG00000231389.7	8.14564	-0.538143	0.688657	3.33379e-19	9.87077e-17	1.48837e-15	HLA-DPA1
ENSG00000254789.2	1.3013	1.58199	2.99382	4.67015e-19	1.34694e-16	1.48837e-15
ENSG00000166503.8	2.98399	0.860375	1.81551	9.60775e-19	2.52904e-16	3.73529e-15	HDGFL3
ENSG00000008952.16	7.05447	0.663392	1.5838	1.73131e-18	4.3384e-16	4.07659e-15	SEC62
ENSG00000111886.10	1.7337	0.901515	1.86803	1.58166e-18	4.00018e-16	4.07659e-15	GABRR2
ENSG00000135218.17	7.61997	0.635882	1.55389	1.28562e-18	3.31231e-16	4.07659e-15	CD36
ENSG00000163421.8	6.66354	0.98466	1.97885	1.08103e-18	2.82168e-16	4.07659e-15	PROK2
ENSG00000188313.12	6.4846	0.866804	1.82362	1.69556e-18	4.25816e-16	4.07659e-15	PLSCR1
ENSG00000136068.14	5.90371	-0.590471	0.664126	2.30463e-18	5.64782e-16	6.41599e-15	FLNB
ENSG00000185261.14	5.66492	0.698919	1.62329	1.73725e-18	4.35169e-16	6.41599e-15	KIAA0825
ENSG00000225830.12	6.31691	-0.227835	0.853915	2.3302e-18	5.70492e-16	6.41599e-15	ERCC6
ENSG00000079215.13	0.774382	0.932211	1.9082	1.20778e-17	2.67729e-15	2.30093e-14	SLC1A3
ENSG00000100154.14	2.13122	-0.932916	0.523799	1.18247e-17	2.62759e-15	2.30093e-14	TTC28
ENSG00000108950.11	0.780375	1.28129	2.43057	1.18008e-17	2.62289e-15	2.30093e-14	FAM20A
ENSG00000112335.14	7.4486	0.800085	1.7412	1.25121e-17	2.76201e-15	2.30093e-14	SNX3
ENSG00000121413.12	4.51679	-0.672298	0.627507	3.61235e-18	8.71859e-16	2.30093e-14	ZSCAN18
ENSG00000139323.13	5.55429	0.510107	1.42416	6.49583e-18	1.52177e-15	2.30093e-14	POC1B
ENSG00000148175.12	7.84526	0.751068	1.68304	5.01037e-18	1.1918e-15	2.30093e-14	STOM
ENSG00000155307.17	5.55647	0.505824	1.41993	1.16305e-17	2.5893e-15	2.30093e-14	SAMSN1
ENSG00000166526.16	5.19964	-0.21476	0.861689	1.32742e-17	2.90897e-15	2.30093e-14	ZNF3
ENSG00000179348.11	2.34811	-1.81268	0.284662	8.64651e-18	1.9822e-15	2.30093e-14	GATA2
ENSG00000186184.16	6.43574	0.564296	1.47867	7.0477e-18	1.64183e-15	2.30093e-14	POLR1D
ENSG00000198216.10	3.60027	1.09445	2.13531	2.35693e-18	5.76448e-16	2.30093e-14	CACNA1E
ENSG00000198805.11	6.43341	0.632573	1.55033	5.38305e-18	1.27553e-15	2.30093e-14	PNP
ENSG00000198833.6	7.09982	0.478509	1.3933	3.87457e-18	9.32581e-16	2.30093e-14	UBE2J1
ENSG00000239961.2	1.148	-1.07152	0.475817	1.33165e-17	2.91707e-15	2.30093e-14	LILRA4
ENSG00000051108.14	6.5703	-0.238158	0.847827	1.81866e-17	3.83285e-15	2.72243e-14	HERPUD1
ENSG00000100095.18	1.04364	-0.907401	0.533145	1.61716e-17	3.46218e-15	2.72243e-14	SEZ6L
ENSG00000110079.16	2.4633	0.873924	1.83264	1.94361e-17	4.05693e-15	2.72243e-14	MS4A4A
ENSG00000131016.16	2.40606	-1.92526	0.263293	2.01727e-17	4.18703e-15	2.72243e-14	AKAP12
ENSG00000163746.11	0.408659	0.934012	1.91058	1.34686e-17	2.94612e-15	2.72243e-14	PLSCR2
ENSG00000164047.4	3.7388	1.36671	2.57881	1.47043e-17	3.1848e-15	2.72243e-14	CAMP
ENSG00000173598.13	5.83012	0.638092	1.55627	1.62689e-17	3.48036e-15	2.72243e-14	NUDT4
ENSG00000278869.1	2.71883	0.964891	1.95192	1.98791e-17	4.13536e-15	2.72243e-14
ENSG00000119326.14	3.45019	1.23067	2.34676	2.70951e-17	5.48527e-15	5.99053e-14	CTNNAL1
ENSG00000176533.12	3.017	-0.717897	0.607983	2.04804e-17	4.24096e-15	5.99053e-14	GNG7
ENSG00000204936.9	1.29573	2.13671	4.39759	2.54916e-17	5.18877e-15	5.99053e-14	CD177
ENSG00000213949.8	3.41157	0.792358	1.7319	2.44582e-17	4.99597e-15	5.99053e-14	ITGA1
ENSG00000118520.14	3.03625	1.2972	2.45751	2.81949e-17	5.68678e-15	7.86524e-14	ARG1
ENSG00000102174.8	1.58752	-0.929683	0.524974	8.10587e-17	1.49224e-14	1.13917e-13	PHEX
ENSG00000120306.9	4.63963	0.819953	1.76535	6.0519e-17	1.15237e-14	1.13917e-13	CYSTM1
ENSG00000137757.10	3.78971	0.983239	1.9769	3.52412e-17	7.0065e-15	1.13917e-13	CASP5
ENSG00000139572.3	0.303996	0.986481	1.98135	4.38653e-17	8.59177e-15	1.13917e-13	GPR84
ENSG00000139651.10	6.67179	-0.222629	0.857002	4.78183e-17	9.30281e-15	1.13917e-13	ZNF740
ENSG00000144290.16	2.44185	-1.59763	0.33042	3.96647e-17	7.82554e-15	1.13917e-13	SLC4A10
ENSG00000154217.14	6.10908	-0.241374	0.845939	5.65641e-17	1.08423e-14	1.13917e-13	PITPNC1
ENSG00000154589.6	3.74915	0.795	1.73508	7.55979e-17	1.40411e-14	1.13917e-13	LY96
ENSG00000164430.15	4.72271	0.334653	1.26107	5.09318e-17	9.85612e-15	1.13917e-13	CGAS
ENSG00000169826.7	6.41573	0.334312	1.26078	7.30971e-17	1.36322e-14	1.13917e-13	CSGALNACT2
ENSG00000175746.6	1.82921	-1.15403	0.449367	6.56674e-17	1.23974e-14	1.13917e-13	LINC02915
ENSG00000185112.5	3.70665	-0.564725	0.676084	6.42271e-17	1.21545e-14	1.13917e-13	FAM43A
ENSG00000237135.1	2.60193	0.820532	1.76606	3.07271e-17	6.15753e-15	1.13917e-13	DDX10P1
ENSG00000281969.1	0.0236471	-1.48252	0.357863	7.81156e-17	1.44494e-14	1.13917e-13
ENSG00000055208.18	7.37141	0.276833	1.21153	1.13713e-16	2.00709e-14	1.4083e-13	TAB2
ENSG00000100387.8	5.15614	0.474399	1.38934	9.37028e-17	1.69644e-14	1.4083e-13	RBX1
ENSG00000116793.15	5.45469	0.426885	1.34433	1.0646e-16	1.89631e-14	1.4083e-13	PHTF1
ENSG00000170571.11	7.90846	0.412839	1.3313	1.1127e-16	1.97e-14	1.4083e-13	EMB
ENSG00000175471.19	6.71414	0.523544	1.43748	1.0264e-16	1.83714e-14	1.4083e-13	MCTP1
ENSG00000213639.9	7.47325	0.553342	1.46748	8.20721e-17	1.50843e-14	1.4083e-13	PPP1CB
ENSG00000223865.10	7.60397	-0.513176	0.700678	1.05879e-16	1.88735e-14	1.4083e-13	HLA-DPB1
ENSG00000078804.12	2.40664	-0.920024	0.5285	1.1381e-16	2.00856e-14	1.71025e-13	TP53INP2
ENSG00000108984.13	5.1125	0.405655	1.32469	2.14095e-16	3.64395e-14	5.35777e-13	MAP2K6
ENSG00000123080.10	2.05228	0.613279	1.52973	2.45263e-16	4.13351e-14	5.35777e-13	CDKN2C
ENSG00000148926.9	5.14446	0.982857	1.97637	2.28108e-16	3.86525e-14	5.35777e-13	ADM
ENSG00000162434.11	9.4254	-0.358001	0.780245	1.40605e-16	2.45034e-14	5.35777e-13	JAK1
ENSG00000163520.13	0.352216	-1.11628	0.461281	1.87825e-16	3.22374e-14	5.35777e-13	FBLN2
ENSG00000233030.2	0.83671	1.08209	2.1171	1.53933e-16	2.67104e-14	5.35777e-13
ENSG00000242574.8	6.76131	-0.436069	0.739146	1.19316e-16	2.09383e-14	5.35777e-13	HLA-DMB
ENSG00000255221.3	1.95807	0.988674	1.98436	2.5636e-16	4.3055e-14	5.35777e-13	CARD17P
ENSG00000186063.12	4.85158	0.454046	1.36988	3.05564e-16	5.08452e-14	8.98762e-13	AIDA
ENSG00000198873.11	5.25921	-0.416132	0.749431	2.57309e-16	4.32016e-14	8.98762e-13	GRK5
ENSG00000008394.12	2.92259	0.613781	1.53026	3.59069e-16	5.92468e-14	1.09273e-12	MGST1
ENSG00000163637.12	0.176536	-1.04121	0.485919	3.1518e-16	5.2352e-14	1.09273e-12	PRICKLE2
ENSG00000116044.15	6.79873	0.31449	1.24357	3.8554e-16	6.33613e-14	1.79268e-12	NFE2L2
ENSG00000172331.11	7.42902	1.17745	2.26177	5.60988e-16	9.09061e-14	2.17661e-12	BPGM
ENSG00000198964.13	6.12008	0.213553	1.15954	4.43255e-16	7.2463e-14	2.17661e-12	SGMS1
ENSG00000111144.9	8.28142	0.509017	1.42308	8.51862e-16	1.35141e-13	2.19764e-12	LTA4H
ENSG00000134627.11	2.8408	0.482246	1.39692	1.05009e-15	1.64237e-13	2.19764e-12	PIWIL4
ENSG00000136960.12	1.47737	-0.736263	0.600292	9.0497e-16	1.43017e-13	2.19764e-12	ENPP2
ENSG00000140287.10	2.73684	-2.00057	0.249901	7.82222e-16	1.2472e-13	2.19764e-12	HDC
ENSG00000162923.14	8.69058	0.502362	1.41653	9.50705e-16	1.49753e-13	2.19764e-12	WDR26
ENSG00000188487.11	-0.326882	1.05925	2.08385	5.83405e-16	9.43812e-14	2.19764e-12	INSC
ENSG00000197121.14	3.78781	0.546242	1.46028	6.997e-16	1.12234e-13	2.19764e-12	PGAP1
ENSG00000110042.7	3.74928	-0.622857	0.649383	1.44202e-15	2.20393e-13	2.66705e-12	DTX4
ENSG00000118985.15	4.46009	0.420568	1.33845	1.8706e-15	2.79041e-13	2.66705e-12	ELL2
ENSG00000121417.13	5.2574	-0.246463	0.84296	2.59268e-15	3.71743e-13	2.66705e-12	ZNF211
ENSG00000152766.5	1.69667	1.20178	2.30023	2.46461e-15	3.55829e-13	2.66705e-12	ANKRD22
ENSG00000157445.14	2.72402	-0.609054	0.655627	2.51947e-15	3.62673e-13	2.66705e-12	CACNA2D3
ENSG00000161944.16	1.91709	0.823344	1.7695	2.66386e-15	3.80492e-13	2.66705e-12	ASGR2
ENSG00000162599.15	4.14122	0.623985	1.54113	1.4418e-15	2.20361e-13	2.66705e-12	NFIA
ENSG00000164484.11	1.07669	0.751598	1.68366	2.05054e-15	3.02836e-13	2.66705e-12	TMEM200A
ENSG00000166886.12	3.10707	-0.601023	0.659286	1.97707e-15	2.93178e-13	2.66705e-12	NAB2
ENSG00000173221.13	6.53282	0.362887	1.286	2.25711e-15	3.29574e-13	2.66705e-12	GLRX
ENSG00000179542.15	2.66616	0.703168	1.62808	1.95735e-15	2.90573e-13	2.66705e-12	SLITRK4
ENSG00000179978.11	3.03058	0.74763	1.67903	1.07867e-15	1.68365e-13	2.66705e-12	NAIPP2
ENSG00000180875.4	-0.0415307	1.00532	2.0074	2.56004e-15	3.67707e-13	2.66705e-12	GREM2
ENSG00000187824.8	1.00264	-0.74367	0.597218	2.52077e-15	3.62835e-13	2.66705e-12	TMEM220
ENSG00000197965.11	6.74197	-0.781115	0.581917	2.28802e-15	3.33523e-13	2.66705e-12	MPZL1
ENSG00000216588.8	-1.21597	-0.858058	0.551695	1.69129e-15	2.54849e-13	2.66705e-12	IGSF23
ENSG00000236194.3	5.35497	0.478605	1.3934	1.19807e-15	1.85704e-13	2.66705e-12
ENSG00000242550.5	0.701069	1.40022	2.63942	1.61983e-15	2.45072e-13	2.66705e-12	SERPINB10
ENSG00000263961.6	2.79429	-0.72652	0.60436	1.26511e-15	1.95335e-13	2.66705e-12	RHEX
ENSG00000052802.12	3.95104	0.447383	1.36356	2.92011e-15	4.11465e-13	2.67751e-12	MSMO1
ENSG00000070269.13	6.15334	0.30756	1.23761	3.11961e-15	4.35009e-13	2.67751e-12	TMEM260
ENSG00000119711.12	4.06832	-0.378568	0.769201	3.31755e-15	4.5789e-13	2.67751e-12	ALDH6A1
ENSG00000125249.6	5.8485	0.579477	1.49431	2.7101e-15	3.8614e-13	2.67751e-12	RAP2A
ENSG00000143162.7	6.62668	0.759721	1.69316	3.40363e-15	4.67695e-13	2.67751e-12	CREG1
ENSG00000143457.10	4.47184	0.277116	1.21177	3.01391e-15	4.22596e-13	2.67751e-12	GOLPH3L
ENSG00000154856.12	0.159281	0.937762	1.91555	3.51763e-15	4.80549e-13	2.67751e-12	APCDD1
ENSG00000169432.14	2.54298	0.827519	1.77463	2.82933e-15	4.00586e-13	2.67751e-12	SCN9A
ENSG00000185650.9	6.27376	0.474556	1.38949	3.30508e-15	4.56462e-13	2.67751e-12	ZFP36L1
ENSG00000271304.1	-0.918367	0.914677	1.88515	3.52359e-15	4.81216e-13	2.67751e-12	DPRXP2
ENSG00000125810.9	8.70744	-0.670532	0.628275	3.57211e-15	4.86639e-13	4.61184e-12	CD93
ENSG00000021355.12	7.20522	0.417289	1.33542	4.01673e-15	5.40119e-13	4.61473e-12	SERPINB1
ENSG00000025293.16	6.93225	-0.186583	0.878684	4.3714e-15	5.81798e-13	4.61473e-12	PHF20
ENSG00000075856.11	6.35852	-0.227874	0.853892	4.29698e-15	5.73123e-13	4.61473e-12	SART3
ENSG00000173597.8	7.00564	0.687858	1.61089	3.72059e-15	5.04653e-13	4.61473e-12	SULT1B1
ENSG00000277443.2	6.02905	0.628669	1.54614	4.24372e-15	5.66893e-13	4.61473e-12	MARCKS
ENSG00000107758.15	6.1156	0.276865	1.21156	4.46344e-15	5.92475e-13	1.17445e-11	PPP3CB
ENSG00000122741.15	6.27353	0.29306	1.22524	5.81114e-15	7.59795e-13	1.17445e-11	DCAF10
ENSG00000181788.3	7.28943	1.0311	2.04358	5.25691e-15	6.91598e-13	1.17445e-11	SIAH2
ENSG00000254554.1	1.61645	0.856712	1.81091	5.60388e-15	7.34391e-13	1.17445e-11	ADM-DT
ENSG00000076641.4	8.38277	0.310657	1.24027	7.1511e-15	9.23157e-13	1.39859e-11	PAG1
ENSG00000109189.12	4.16685	0.417339	1.33546	8.98937e-15	1.1411e-12	1.39859e-11	USP46
ENSG00000112290.12	0.423664	0.741424	1.67183	9.45726e-15	1.19542e-12	1.39859e-11	WASF1
ENSG00000113615.12	5.03838	0.252726	1.19146	9.54921e-15	1.20604e-12	1.39859e-11	SEC24A
ENSG00000127328.21	4.82173	0.381053	1.30229	6.95836e-15	8.99877e-13	1.39859e-11	RAB3IP
ENSG00000162949.16	-1.03536	0.905919	1.87374	5.97588e-15	7.79904e-13	1.39859e-11	CAPN13
ENSG00000167283.7	5.7452	0.409167	1.32792	9.32453e-15	1.18006e-12	1.39859e-11	ATP5MG
ENSG00000248651.1	-1.45332	0.804955	1.74709	9.49857e-15	1.20019e-12	1.39859e-11	GCSHP1
ENSG00000058063.15	8.24682	0.356512	1.28033	1.06611e-14	1.33438e-12	1.55433e-11	ATP11B
ENSG00000107281.9	2.18141	0.96309	1.94948	1.44324e-14	1.75316e-12	1.55433e-11	NPDC1
ENSG00000125482.12	4.62964	-0.253434	0.838897	1.02421e-14	1.28627e-12	1.55433e-11	TTF1
ENSG00000157404.15	1.87702	-0.718404	0.60777	1.38392e-14	1.68894e-12	1.55433e-11	KIT
ENSG00000181381.13	8.64064	0.615622	1.53222	1.54443e-14	1.86136e-12	1.55433e-11	DDX60L
ENSG00000182512.4	7.21555	1.07731	2.11009	1.36104e-14	1.664e-12	1.55433e-11	GLRX5
ENSG00000185477.4	7.58976	0.392674	1.31282	9.57805e-15	1.20937e-12	1.55433e-11	GPRIN3
ENSG00000188649.12	2.64847	0.666466	1.58718	1.50765e-14	1.82223e-12	1.55433e-11	CC2D2B
ENSG00000188761.11	1.68165	0.608027	1.52417	1.39621e-14	1.7023e-12	1.55433e-11	BCL2L15
ENSG00000197467.13	0.86286	-1.2102	0.432207	1.46365e-14	1.77513e-12	1.55433e-11	COL13A1
ENSG00000234358.1	1.29629	0.994069	1.99179	1.51692e-14	1.83212e-12	1.55433e-11	RPL7AP42
ENSG00000239265.5	-1.20982	0.983886	1.97779	1.55061e-14	1.86792e-12	1.55433e-11	CLRN1-AS1
ENSG00000069869.15	3.60001	0.507759	1.42184	1.5583e-14	1.87606e-12	1.62863e-11	NEDD4
ENSG00000278897.1	3.49822	-0.516379	0.699124	1.61073e-14	1.9317e-12	3.81734e-11
ENSG00000072210.18	5.47543	-0.218633	0.859379	3.61468e-14	4.10374e-12	4.29793e-11	ALDH3A2
ENSG00000078098.13	-1.05522	0.940065	1.91861	2.79382e-14	3.24212e-12	4.29793e-11	FAP
ENSG00000105426.16	1.88401	-0.936253	0.522588	4.23672e-14	4.73218e-12	4.29793e-11	PTPRS
ENSG00000111912.19	5.80738	0.257666	1.19554	5.24364e-14	5.7075e-12	4.29793e-11	NCOA7
ENSG00000115310.17	6.54863	0.309904	1.23962	5.25266e-14	5.71601e-12	4.29793e-11	RTN4
ENSG00000116815.15	5.7045	0.365183	1.28805	5.46205e-14	5.91253e-12	4.29793e-11	CD58
ENSG00000119013.8	2.92952	0.732828	1.66189	5.31698e-14	5.7766e-12	4.29793e-11	NDUFB3
ENSG00000120265.16	5.57047	0.352791	1.27703	4.32197e-14	4.81673e-12	4.29793e-11	PCMT1
ENSG00000124469.11	1.96587	1.35386	2.55595	2.70536e-14	3.14698e-12	4.29793e-11	CEACAM8
ENSG00000130164.13	3.54548	0.640317	1.55867	5.08817e-14	5.56017e-12	4.29793e-11	LDLR
ENSG00000133112.16	9.08905	0.672801	1.59417	3.92564e-14	4.42046e-12	4.29793e-11	TPT1
ENSG00000143889.15	5.96595	0.350846	1.27531	4.8242e-14	5.30733e-12	4.29793e-11	HNRNPLL
ENSG00000144554.10	4.9239	-0.258143	0.836164	4.41419e-14	4.90777e-12	4.29793e-11	FANCD2
ENSG00000146592.16	7.80763	0.741127	1.67148	2.29621e-14	2.70094e-12	4.29793e-11	CREB5
ENSG00000147883.10	2.21906	0.634377	1.55227	2.56922e-14	2.99967e-12	4.29793e-11	CDKN2B
ENSG00000166946.13	8.0461	0.457756	1.3734	3.59321e-14	4.08168e-12	4.29793e-11	CCNDBP1
ENSG00000170558.8	0.754644	-1.15123	0.450241	4.70042e-14	5.18759e-12	4.29793e-11	CDH2
ENSG00000171604.11	4.07876	-0.557867	0.679306	5.25667e-14	5.7198e-12	4.29793e-11	CXXC5
ENSG00000173744.17	7.46545	0.268533	1.20458	1.93491e-14	2.29869e-12	4.29793e-11	AGFG1
ENSG00000173812.10	7.3335	0.406144	1.32514	2.2054e-14	2.60059e-12	4.29793e-11	EIF1
ENSG00000196872.11	1.48253	-0.728818	0.603398	3.86159e-14	4.35564e-12	4.29793e-11	CRACDL
ENSG00000196954.13	8.22133	0.45458	1.37038	2.9123e-14	3.36883e-12	4.29793e-11	CASP4
ENSG00000213557.4	-0.152252	-0.928101	0.52555	2.87752e-14	3.33172e-12	4.29793e-11	RPL31P43
ENSG00000255398.2	5.19599	0.762752	1.69672	4.17804e-14	4.67376e-12	4.29793e-11	HCAR3
ENSG00000272914.1	1.03967	0.735261	1.6647	3.38021e-14	3.86145e-12	4.29793e-11
ENSG00000273247.5	5.03485	0.326702	1.25414	1.73363e-14	2.07109e-12	4.29793e-11	RAB33B-AS1
ENSG00000274588.1	2.18988	-1.2427	0.422581	3.36316e-14	3.84372e-12	4.29793e-11	DGKK
ENSG00000008083.13	7.11692	-0.440333	0.736964	5.46963e-14	5.9196e-12	5.84764e-11	JARID2
ENSG00000105011.8	2.46898	-0.77455	0.584571	5.65789e-14	6.10209e-12	9.64048e-11	ASF1B
ENSG00000112655.15	1.27849	-0.816612	0.567774	7.08962e-14	7.52568e-12	9.64048e-11	PTK7
ENSG00000125384.6	5.56207	0.348001	1.2728	7.09339e-14	7.52937e-12	9.64048e-11	PTGER2
ENSG00000169385.2	3.07076	0.99133	1.98802	6.89028e-14	7.33017e-12	9.64048e-11	RNASE2
ENSG00000179562.2	6.143	-0.293259	0.816057	6.4762e-14	6.92128e-12	9.64048e-11	GCC1
ENSG00000104522.15	5.33387	1.00802	2.01115	7.20975e-14	7.64309e-12	1.00742e-10	GFUS
ENSG00000106477.18	3.13949	-0.360531	0.778878	7.93429e-14	8.34754e-12	1.00742e-10	CEP41
ENSG00000114166.7	8.37695	0.559346	1.4736	9.45033e-14	9.78758e-12	1.00742e-10	KAT2B
ENSG00000141580.15	5.71537	-0.217643	0.859969	8.95867e-14	9.3255e-12	1.00742e-10	WDR45B
ENSG00000155744.9	8.1834	0.545032	1.45905	8.97635e-14	9.3422e-12	1.00742e-10	HYCC2
ENSG00000166428.12	3.22667	-0.762253	0.589575	8.53636e-14	8.92485e-12	1.00742e-10	PLD4
ENSG00000174123.10	4.93422	0.515839	1.42983	9.87084e-14	1.01791e-11	1.00742e-10	TLR10
ENSG00000175866.15	1.48647	-0.799647	0.57449	1.00603e-13	1.03544e-11	1.00742e-10	BAIAP2
ENSG00000238113.6	4.848	0.649646	1.56878	7.76447e-14	8.18338e-12	1.00742e-10	LINC01410
ENSG00000105855.9	1.5257	-1.62447	0.324329	1.11318e-13	1.13769e-11	1.62404e-10	ITGB8
ENSG00000148346.11	2.3614	1.13364	2.19411	1.22707e-13	1.24517e-11	1.62404e-10	LCN2
ENSG00000152990.13	1.8775	-0.790732	0.578051	1.01288e-13	1.04176e-11	1.62404e-10	ADGRA3
ENSG00000173559.12	9.55124	0.520778	1.43473	1.26142e-13	1.27728e-11	1.62404e-10	NABP1
ENSG00000234424.2	0.210164	0.729421	1.65797	1.25692e-13	1.27309e-11	1.62404e-10
ENSG00000136048.13	4.33039	0.434546	1.35149	1.2743e-13	1.28929e-11	2.32712e-10	DRAM1
ENSG00000084733.10	7.16303	0.247823	1.18741	1.54962e-13	1.55113e-11	2.69667e-10	RAB10
ENSG00000099622.13	8.05908	-0.259039	0.835644	2.03425e-13	2.00025e-11	2.69667e-10	CIRBP
ENSG00000110330.8	7.30093	0.487966	1.40247	1.34923e-13	1.36066e-11	2.69667e-10	BIRC2
ENSG00000113282.13	6.76112	-0.219437	0.858901	1.75509e-13	1.7435e-11	2.69667e-10	CLINT1
ENSG00000118777.10	2.78461	0.979197	1.97137	1.72703e-13	1.71741e-11	2.69667e-10	ABCG2
ENSG00000138821.12	4.52428	0.398539	1.31817	1.99703e-13	1.96632e-11	2.69667e-10	SLC39A8
ENSG00000155097.11	5.93641	0.312587	1.24193	1.73697e-13	1.72666e-11	2.69667e-10	ATP6V1C1
ENSG00000271270.5	1.85098	-0.441746	0.736243	1.83988e-13	1.82205e-11	2.69667e-10	TMCC1-DT
ENSG00000005108.15	-0.0625089	-1.36463	0.388334	2.04377e-13	2.00892e-11	2.85414e-10	THSD7A
ENSG00000035681.7	6.33668	0.212448	1.15865	2.15694e-13	2.11192e-11	2.85414e-10	NSMAF
ENSG00000070915.9	-0.244832	-0.832512	0.56155	2.76323e-13	2.66254e-11	3.81809e-10	SLC12A3
ENSG00000111726.12	3.90207	0.497638	1.4119	2.94318e-13	2.8231e-11	3.81809e-10	CMAS
ENSG00000140939.14	1.16871	0.645463	1.56424	2.7386e-13	2.64044e-11	3.81809e-10	NOL3
ENSG00000140968.10	6.36543	-0.38201	0.767368	2.57142e-13	2.48977e-11	3.81809e-10	IRF8
ENSG00000175894.14	-0.356944	-1.09548	0.467982	2.99135e-13	2.86585e-11	3.81809e-10	TSPEAR
ENSG00000184743.12	6.47169	0.195592	1.14519	2.4977e-13	2.42292e-11	3.81809e-10	ATL3
ENSG00000185483.11	-0.748485	-1.13348	0.455815	2.22755e-13	2.17579e-11	3.81809e-10	ROR1
ENSG00000063978.15	6.6562	-0.233066	0.850825	4.17778e-13	3.88716e-11	3.83197e-10	RNF4
ENSG00000111817.16	6.37163	0.397105	1.31686	5.36036e-13	4.84826e-11	3.83197e-10	DSE
ENSG00000136161.12	6.90328	0.328384	1.25561	3.78893e-13	3.55896e-11	3.83197e-10	RCBTB2
ENSG00000146250.6	-1.28292	-0.874025	0.545622	4.76082e-13	4.3678e-11	3.83197e-10	PRSS35
ENSG00000151726.13	10.0467	0.751194	1.68318	4.8642e-13	4.45163e-11	3.83197e-10	ACSL1
ENSG00000152484.13	6.92476	0.745708	1.6768	4.44881e-13	4.11227e-11	3.83197e-10	USP12
ENSG00000157554.18	0.423607	0.99321	1.99061	4.34426e-13	4.02578e-11	3.83197e-10	ERG
ENSG00000158050.4	3.79146	-0.774099	0.584754	5.01385e-13	4.57225e-11	3.83197e-10	DUSP2
ENSG00000163751.3	1.95391	-1.5643	0.338143	5.33118e-13	4.82519e-11	3.83197e-10	CPA3
ENSG00000167555.13	4.96077	-0.395165	0.760402	5.13159e-13	4.66654e-11	3.83197e-10	ZNF528
ENSG00000168802.12	6.45011	-0.328611	0.796303	4.75127e-13	4.36004e-11	3.83197e-10	CHTF8
ENSG00000176597.11	4.409	0.616754	1.53342	5.53108e-13	4.9826e-11	3.83197e-10	B3GNT5
ENSG00000182489.8	1.31472	-0.906408	0.533512	4.68976e-13	4.30995e-11	3.83197e-10	XKRX
ENSG00000182810.6	4.19818	-0.337404	0.791464	3.088e-13	2.95128e-11	3.83197e-10	DDX28
ENSG00000189319.13	6.8572	-0.434565	0.739917	4.12918e-13	3.84648e-11	3.83197e-10	FAM53B
ENSG00000196581.10	0.935523	-1.02253	0.492251	3.99756e-13	3.73582e-11	3.83197e-10	AJAP1
ENSG00000219607.3	0.212072	-0.88872	0.540093	3.41194e-13	3.23474e-11	3.83197e-10	PPP1R3G
ENSG00000227165.7	1.78486	-0.675967	0.625913	4.21682e-13	3.91977e-11	3.83197e-10	WDR11-DT
ENSG00000233093.5	1.40733	0.719615	1.64674	4.50996e-13	4.16265e-11	3.83197e-10	LINC00892
ENSG00000233392.5	1.86909	-1.04119	0.485928	3.36652e-13	3.19527e-11	3.83197e-10	UICLM
ENSG00000001084.10	5.46835	0.540957	1.45494	9.73187e-13	8.26112e-11	6.20402e-10	GCLC
ENSG00000067066.16	8.54903	0.292056	1.22438	6.67772e-13	5.91574e-11	6.20402e-10	SP100
ENSG00000083814.13	5.01588	-0.250736	0.840468	9.40421e-13	8.01892e-11	6.20402e-10	ZNF671
ENSG00000083844.10	6.86292	-0.176724	0.88471	7.13482e-13	6.27969e-11	6.20402e-10	ZNF264
ENSG00000089053.12	7.46592	-0.153073	0.899333	6.01211e-13	5.37719e-11	6.20402e-10	ANAPC5
ENSG00000100568.10	6.80004	0.432514	1.34958	6.21126e-13	5.5394e-11	6.20402e-10	VTI1B
ENSG00000102780.16	5.48268	0.351882	1.27622	8.20661e-13	7.11485e-11	6.20402e-10	DGKH
ENSG00000118564.14	9.22557	0.461028	1.37652	9.64692e-13	8.19853e-11	6.20402e-10	FBXL5
ENSG00000137752.23	7.53318	0.405122	1.3242	7.80603e-13	6.80565e-11	6.20402e-10	CASP1
ENSG00000152102.17	6.42	-0.235891	0.84916	8.19241e-13	7.10394e-11	6.20402e-10	FAM168B
ENSG00000152380.9	2.62929	0.539361	1.45333	7.69782e-13	6.72153e-11	6.20402e-10	FAM151B
ENSG00000154269.14	1.33742	-1.04853	0.483459	8.31733e-13	7.1997e-11	6.20402e-10	ENPP3
ENSG00000159713.10	1.5295	-0.853747	0.553346	6.6215e-13	5.87065e-11	6.20402e-10	TPPP3
ENSG00000168995.13	3.87039	-0.582533	0.66779	7.03696e-13	6.20217e-11	6.20402e-10	SIGLEC7
ENSG00000173083.14	5.44408	0.484074	1.39869	8.56494e-13	7.38851e-11	6.20402e-10	HPSE
ENSG00000179023.8	-1.35166	-0.911908	0.531482	8.37005e-13	7.24001e-11	6.20402e-10	KLHDC7A
ENSG00000181852.17	6.44716	-0.197355	0.872148	7.35733e-13	6.45516e-11	6.20402e-10	RNF41
ENSG00000204084.12	5.9361	-0.276787	0.825427	9.18264e-13	7.85391e-11	6.20402e-10	INPP5B
ENSG00000240225.10	3.37215	-0.473585	0.720173	8.06373e-13	7.00496e-11	6.20402e-10	ZNF542P
ENSG00000260228.5	1.20062	-0.58641	0.665998	5.55538e-13	5.00162e-11	6.20402e-10	CDH13-AS2
ENSG00000279117.1	5.40603	-0.405515	0.754966	9.10604e-13	7.79662e-11	6.20402e-10
ENSG00000076043.9	4.35647	0.376072	1.2978	1.2773e-12	1.05017e-10	7.96586e-10	REXO2
ENSG00000078124.11	5.53353	0.303744	1.23434	1.33198e-12	1.08898e-10	7.96586e-10	ACER3
ENSG00000123700.4	7.44132	0.636616	1.55468	1.42703e-12	1.15542e-10	7.96586e-10	KCNJ2
ENSG00000141404.15	1.93678	-0.817583	0.567392	1.35388e-12	1.10441e-10	7.96586e-10	GNAL
ENSG00000141543.9	5.45857	-0.33669	0.791856	1.27927e-12	1.05158e-10	7.96586e-10	EIF4A3
ENSG00000144802.11	7.37778	0.332182	1.25892	1.05632e-12	8.88756e-11	7.96586e-10	NFKBIZ
ENSG00000145545.11	4.68281	0.297492	1.22901	1.41903e-12	1.14988e-10	7.96586e-10	SRD5A1
ENSG00000149212.11	8.76058	0.555565	1.46974	1.13068e-12	9.4391e-11	7.96586e-10	SESN3
ENSG00000153317.14	7.14943	0.462182	1.37762	9.74984e-13	8.27433e-11	7.96586e-10	ASAP1
ENSG00000158966.13	0.329039	-0.86726	0.548187	1.25448e-12	1.03385e-10	7.96586e-10	CACHD1
ENSG00000165782.10	5.51278	-0.187196	0.878311	1.13373e-12	9.46154e-11	7.96586e-10	PIP4P1
ENSG00000165949.12	2.65287	1.91898	3.78156	1.15544e-12	9.62085e-11	7.96586e-10	IFI27
ENSG00000168702.17	0.13438	-0.941264	0.520776	1.2801e-12	1.05217e-10	7.96586e-10	LRP1B
ENSG00000177483.11	2.54398	0.564551	1.47893	1.36664e-12	1.11336e-10	7.96586e-10	RBM44
ENSG00000196126.11	7.4721	-0.613011	0.653831	1.20888e-12	1.00099e-10	7.96586e-10	HLA-DRB1
ENSG00000196371.3	4.63411	0.272682	1.20805	1.18691e-12	9.85049e-11	7.96586e-10	FUT4
ENSG00000196636.7	2.20361	0.409452	1.32818	1.34378e-12	1.0973e-10	7.96586e-10	SDHAF3
ENSG00000258227.6	2.58485	0.750113	1.68192	1.13437e-12	9.46623e-11	7.96586e-10	CLEC5A
ENSG00000007516.13	2.98737	-1.03273	0.488784	1.43661e-12	1.16205e-10	1.63406e-09	BAIAP3
ENSG00000070214.15	5.89363	0.2351	1.17699	1.70257e-12	1.35928e-10	1.63406e-09	SLC44A1
ENSG00000070761.7	3.8401	-0.277609	0.824957	2.07237e-12	1.62516e-10	1.63406e-09	CFAP20
ENSG00000102837.6	1.97142	1.77035	3.41137	1.94277e-12	1.53306e-10	1.63406e-09	OLFM4
ENSG00000103005.11	5.12654	0.503742	1.41789	1.81544e-12	1.44144e-10	1.63406e-09	USB1
ENSG00000104375.15	4.33358	0.433853	1.35084	1.60235e-12	1.28556e-10	1.63406e-09	STK3
ENSG00000104549.11	3.21746	0.453645	1.3695	2.14485e-12	1.67617e-10	1.63406e-09	SQLE
ENSG00000114737.15	5.08463	0.5397	1.45367	1.49636e-12	1.20681e-10	1.63406e-09	CISH
ENSG00000124243.17	3.83956	-0.537499	0.688964	1.91967e-12	1.51653e-10	1.63406e-09	BCAS4
ENSG00000145990.10	5.8384	-0.476122	0.718907	2.10083e-12	1.64523e-10	1.63406e-09	GFOD1
ENSG00000163328.13	6.89271	0.342748	1.26817	1.57622e-12	1.26623e-10	1.63406e-09	GPR155
ENSG00000180776.15	7.33028	0.336657	1.26283	2.01964e-12	1.58782e-10	1.63406e-09	ZDHHC20
ENSG00000267453.7	-0.782812	-1.07247	0.475505	1.82123e-12	1.44564e-10	1.63406e-09	CLEC4OP
ENSG00000271605.5	4.32694	0.553855	1.468	1.83755e-12	1.45744e-10	1.63406e-09	MILR1
ENSG00000101782.14	8.83607	0.79888	1.73975	2.37323e-12	1.83509e-10	1.68165e-09	RIOK3
ENSG00000198795.10	0.226918	-0.754765	0.592643	2.3815e-12	1.84079e-10	1.68165e-09	ZNF521
ENSG00000233937.6	2.6608	0.33928	1.26513	2.23472e-12	1.73907e-10	1.68165e-09	CTC-338M12.4
ENSG00000236467.8	-1.48002	-0.569549	0.673828	2.17312e-12	1.69596e-10	1.68165e-09	KCNMA1-AS1
ENSG00000122420.9	-0.677369	1.19367	2.28734	2.46225e-12	1.89651e-10	1.77887e-09	PTGFR
ENSG00000198176.12	6.27787	0.700053	1.62457	2.38968e-12	1.84642e-10	1.77887e-09	TFDP1
ENSG00000023734.10	3.76382	0.388723	1.30923	2.63568e-12	2.01893e-10	2.72459e-09	STRAP
ENSG00000065618.18	-0.163711	1.08004	2.11409	3.00671e-12	2.27936e-10	2.72459e-09	COL17A1
ENSG00000100614.17	8.35198	0.505543	1.41966	2.91366e-12	2.21455e-10	2.72459e-09	PPM1A
ENSG00000124228.14	5.33181	-0.293149	0.816119	2.88307e-12	2.19317e-10	2.72459e-09	DDX27
ENSG00000151553.14	6.49709	0.356077	1.27994	3.27801e-12	2.4664e-10	2.72459e-09	FHIP2A
ENSG00000172164.13	5.54821	0.259062	1.1967	3.08445e-12	2.33324e-10	2.72459e-09	SNTB1
ENSG00000173480.10	5.38822	-0.195233	0.873432	2.96145e-12	2.24787e-10	2.72459e-09	ZNF417
ENSG00000214788.2	-1.16296	0.754156	1.68664	3.25688e-12	2.45194e-10	2.72459e-09
ENSG00000267365.1	2.15289	0.684952	1.60765	2.50422e-12	1.92534e-10	2.72459e-09	KCNJ2-AS1
ENSG00000086548.8	0.424622	1.17606	2.25959	4.83107e-12	3.4886e-10	2.78633e-09	CEACAM6
ENSG00000091106.18	6.12366	0.457088	1.37277	3.8929e-12	2.88119e-10	2.78633e-09	NLRC4
ENSG00000101417.11	3.98996	-0.254848	0.838075	4.58036e-12	3.32919e-10	2.78633e-09	PXMP4
ENSG00000104824.16	6.90523	-0.164247	0.892394	3.9712e-12	2.93304e-10	2.78633e-09	HNRNPL
ENSG00000113916.17	7.82688	0.694138	1.61792	4.06603e-12	2.99555e-10	2.78633e-09	BCL6
ENSG00000116977.18	7.20488	0.201659	1.15002	3.45451e-12	2.58685e-10	2.78633e-09	LGALS8
ENSG00000126858.16	6.35715	0.329251	1.25636	4.83968e-12	3.49404e-10	2.78633e-09	RHOT1
ENSG00000133048.12	6.25136	-1.2143	0.430983	3.82784e-12	2.83794e-10	2.78633e-09	CHI3L1
ENSG00000137094.14	1.48047	-0.752881	0.593418	4.4405e-12	3.23935e-10	2.78633e-09	DNAJB5
ENSG00000145780.7	5.90276	0.297562	1.22907	4.79023e-12	3.46278e-10	2.78633e-09	FEM1C
ENSG00000147454.13	11.5963	0.77351	1.70942	4.83062e-12	3.48832e-10	2.78633e-09	SLC25A37
ENSG00000153250.19	7.2499	0.23659	1.1782	3.29367e-12	2.47712e-10	2.78633e-09	RBMS1
ENSG00000164949.7	-1.16864	-0.685191	0.621924	4.02418e-12	2.968e-10	2.78633e-09	GEM
ENSG00000168172.8	6.84158	0.215313	1.16096	4.22207e-12	3.09772e-10	2.78633e-09	HOOK3
ENSG00000196074.12	3.40336	0.595902	1.51142	4.32861e-12	3.16701e-10	2.78633e-09	SYCP2
ENSG00000198574.5	3.94091	-0.750325	0.59447	3.8528e-12	2.85455e-10	2.78633e-09	SH2D1B
ENSG00000248429.5	3.58597	0.667885	1.58874	4.69869e-12	3.40469e-10	2.78633e-09	GASK1B-AS1
ENSG00000261115.5	-0.431558	0.860734	1.81596	4.24438e-12	3.11227e-10	2.78633e-09	TMEM178B
ENSG00000100150.16	5.44239	-0.265351	0.831996	5.35036e-12	3.83162e-10	5.03174e-09	DEPDC5
ENSG00000100297.15	5.574	-0.37809	0.769456	5.43936e-12	3.89042e-10	5.03174e-09	MCM5
ENSG00000184602.5	7.22643	-0.473184	0.720373	4.90836e-12	3.53733e-10	5.03174e-09	SNN
ENSG00000249138.1	3.63626	0.799372	1.74034	5.2786e-12	3.78409e-10	5.03174e-09
ENSG00000072134.15	3.48101	-0.51309	0.70072	7.05974e-12	4.95289e-10	6.03457e-09	EPN2
ENSG00000103510.19	6.00256	-0.275267	0.826297	8.23224e-12	5.6978e-10	6.03457e-09	KAT8
ENSG00000105810.9	6.57899	0.279977	1.21418	5.55634e-12	3.9675e-10	6.03457e-09	CDK6
ENSG00000114346.13	3.31337	0.481986	1.39667	5.93728e-12	4.22048e-10	6.03457e-09	ECT2
ENSG00000130803.14	5.99363	-0.193895	0.874242	5.99348e-12	4.25761e-10	6.03457e-09	ZNF317
ENSG00000132964.11	4.05621	0.316516	1.24532	7.6888e-12	5.35505e-10	6.03457e-09	CDK8
ENSG00000147324.10	5.53036	0.40866	1.32745	8.20434e-12	5.68031e-10	6.03457e-09	MFHAS1
ENSG00000155380.11	3.76595	0.32828	1.25552	7.87863e-12	5.47526e-10	6.03457e-09	SLC16A1
ENSG00000163634.11	3.6062	0.405838	1.32486	7.53313e-12	5.25607e-10	6.03457e-09	THOC7
ENSG00000165490.12	2.87607	0.463859	1.37923	7.24092e-12	5.06932e-10	6.03457e-09	DDIAS
ENSG00000170955.9	-0.526618	0.920906	1.8933	8.40848e-12	5.80805e-10	6.03457e-09	CAVIN3
ENSG00000171649.11	3.49216	-0.456921	0.728539	6.5229e-12	4.60499e-10	6.03457e-09	ZIK1
ENSG00000172794.19	6.61919	-0.388952	0.763684	6.37103e-12	4.50578e-10	6.03457e-09	RAB37
ENSG00000198001.13	6.91026	0.198807	1.14775	8.36591e-12	5.78146e-10	6.03457e-09	IRAK4
ENSG00000253214.1	0.459415	0.813116	1.757	8.08318e-12	5.60422e-10	6.03457e-09
ENSG00000076864.19	2.1272	2.2577	4.78228	1.36761e-11	9.00097e-10	7.36865e-09	RAP1GAP
ENSG00000100591.7	5.41827	-0.249242	0.841339	1.1655e-11	7.81181e-10	7.36865e-09	AHSA1
ENSG00000100650.15	8.39763	-0.172614	0.887233	1.19448e-11	7.985e-10	7.36865e-09	SRSF5
ENSG00000104626.14	4.63474	0.28503	1.21844	1.31614e-11	8.70224e-10	7.36865e-09	ERI1
ENSG00000109466.13	6.45794	0.440862	1.35742	9.09219e-12	6.23951e-10	7.36865e-09	KLHL2
ENSG00000114209.14	5.57183	0.443026	1.35945	1.47461e-11	9.61329e-10	7.36865e-09	PDCD10
ENSG00000124226.10	6.53276	-0.187247	0.87828	1.46651e-11	9.56737e-10	7.36865e-09	RNF114
ENSG00000133657.14	6.83734	0.215988	1.1615	1.10711e-11	7.46007e-10	7.36865e-09	ATP13A3
ENSG00000134248.13	4.69946	0.303429	1.23407	1.21782e-11	8.12381e-10	7.36865e-09	LAMTOR5
ENSG00000135046.13	7.68155	0.545022	1.45904	1.48575e-11	9.67642e-10	7.36865e-09	ANXA1
ENSG00000138190.16	5.79689	0.407875	1.32673	1.08207e-11	7.30805e-10	7.36865e-09	EXOC6
ENSG00000138600.9	6.39856	0.214086	1.15997	1.43675e-11	9.39799e-10	7.36865e-09	SPPL2A
ENSG00000138640.14	5.40356	0.522941	1.43688	1.46579e-11	9.56327e-10	7.36865e-09	FAM13A
ENSG00000143344.15	2.24785	0.451976	1.36791	8.47055e-12	5.84677e-10	7.36865e-09	RGL1
ENSG00000143545.8	0.469114	0.673078	1.59447	1.43521e-11	9.3892e-10	7.36865e-09	RAB13
ENSG00000151743.10	4.3095	0.364189	1.28716	1.07272e-11	7.25111e-10	7.36865e-09	AMN1
ENSG00000152760.9	-0.694402	0.900002	1.86607	1.38853e-11	9.12159e-10	7.36865e-09	DYNLT5
ENSG00000154188.9	2.99504	-0.711792	0.610561	1.3591e-11	8.95178e-10	7.36865e-09	ANGPT1
ENSG00000163251.3	2.46752	0.628021	1.54544	1.04185e-11	7.06249e-10	7.36865e-09	FZD5
ENSG00000165238.16	-0.921637	-0.77896	0.582787	1.03109e-11	6.99642e-10	7.36865e-09	WNK2
ENSG00000168297.15	5.74586	0.31961	1.24799	1.22708e-11	8.17875e-10	7.36865e-09	PXK
ENSG00000178075.19	4.19076	-0.679522	0.624372	1.17356e-11	7.86003e-10	7.36865e-09	GRAMD1C
ENSG00000187210.12	4.9491	0.305689	1.23601	1.31459e-11	8.69317e-10	7.36865e-09	GCNT1
ENSG00000196220.15	2.71776	-0.593451	0.662756	1.4579e-11	9.51847e-10	7.36865e-09	SRGAP3
ENSG00000196873.15	2.92122	0.423079	1.34079	8.87475e-12	6.10266e-10	7.36865e-09	ZNG1C
ENSG00000197353.3	-0.003039	-1.01558	0.494629	1.15737e-11	7.76304e-10	7.36865e-09	LYPD2
ENSG00000231607.10	6.25308	0.355738	1.27964	9.48012e-12	6.48231e-10	7.36865e-09	DLEU2
ENSG00000247400.3	2.63465	0.5735	1.48813	1.50569e-11	9.78903e-10	7.36865e-09	DNAJC3-DT
ENSG00000065911.11	4.99201	0.337225	1.26332	1.77917e-11	1.14053e-09	1.27219e-08	MTHFD2
ENSG00000102054.17	5.74522	-0.23975	0.846892	2.07879e-11	1.31277e-09	1.27219e-08	RBBP7
ENSG00000106462.10	3.54953	0.355635	1.27955	2.17287e-11	1.36581e-09	1.27219e-08	EZH2
ENSG00000110958.15	6.02776	0.409323	1.32806	1.93962e-11	1.23341e-09	1.27219e-08	PTGES3
ENSG00000111450.13	4.24967	0.437103	1.35388	2.20556e-11	1.38412e-09	1.27219e-08	STX2
ENSG00000116199.11	5.98148	0.375801	1.29756	1.80984e-11	1.15839e-09	1.27219e-08	FAM20B
ENSG00000132541.10	1.27487	0.543046	1.45705	1.7682e-11	1.13412e-09	1.27219e-08	RIDA
ENSG00000162496.8	3.86693	-0.455976	0.729017	2.19227e-11	1.37668e-09	1.27219e-08	DHRS3
ENSG00000163346.16	7.83198	-0.466846	0.723545	2.01666e-11	1.27748e-09	1.27219e-08	PBXIP1
ENSG00000163902.11	7.73982	-0.25768	0.836432	2.21397e-11	1.38882e-09	1.27219e-08	RPN1
ENSG00000165092.12	4.71062	-0.63795	0.642625	2.10477e-11	1.32747e-09	1.27219e-08	ALDH1A1
ENSG00000173166.17	3.44331	0.507874	1.42195	1.56071e-11	1.01162e-09	1.27219e-08	RAPH1
ENSG00000185905.3	7.20935	-0.394716	0.760639	2.14117e-11	1.34799e-09	1.27219e-08	C16orf54
ENSG00000196199.13	6.53153	-0.147877	0.902577	1.79283e-11	1.14849e-09	1.27219e-08	MPHOSPH8
ENSG00000197646.7	0.529153	0.879226	1.83939	2.00089e-11	1.26849e-09	1.27219e-08	PDCD1LG2
ENSG00000226137.5	4.30691	-0.551406	0.682355	2.16004e-11	1.3586e-09	1.27219e-08	BAIAP2-DT
ENSG00000249309.1	2.12807	0.769623	1.70482	1.84428e-11	1.1784e-09	1.27219e-08
ENSG00000274211.4	4.70756	-0.262552	0.833612	1.5113e-11	9.82064e-10	1.27219e-08	SOCS7
ENSG00000141699.10	6.85412	-0.208522	0.865424	2.24854e-11	1.40811e-09	1.55661e-08	RETREG3
ENSG00000151491.12	1.72628	0.563716	1.47807	2.6101e-11	1.61109e-09	1.55661e-08	EPS8
ENSG00000158578.18	11.0419	1.26663	2.40599	2.59178e-11	1.60095e-09	1.55661e-08	ALAS2
ENSG00000162929.13	3.5205	0.318149	1.24673	2.5026e-11	1.55135e-09	1.55661e-08	SANBR
ENSG00000165175.15	6.0709	-0.509972	0.702236	2.45157e-11	1.52281e-09	1.55661e-08	MID1IP1
ENSG00000165795.23	2.51428	-0.46857	0.722681	2.44791e-11	1.52076e-09	1.55661e-08	NDRG2
ENSG00000197992.6	1.02386	-0.804627	0.57251	2.3543e-11	1.46809e-09	1.55661e-08	CLEC9A
ENSG00000264204.2	1.09461	-0.896693	0.537117	2.319e-11	1.44812e-09	1.55661e-08	AGAP7P
ENSG00000100109.16	6.07938	-0.311896	0.805582	2.64945e-11	1.63284e-09	1.97193e-08	TFIP11
ENSG00000111445.13	3.62272	-0.209386	0.864905	2.9128e-11	1.78048e-09	1.97193e-08	RFC5
ENSG00000120833.13	3.66558	0.417823	1.33591	2.90033e-11	1.77354e-09	1.97193e-08	SOCS2
ENSG00000121989.14	4.13607	0.365507	1.28833	2.80435e-11	1.71997e-09	1.97193e-08	ACVR2A
ENSG00000135365.15	6.95183	0.391493	1.31175	2.83196e-11	1.73541e-09	1.97193e-08	PHF21A
ENSG00000070061.14	6.2511	-0.220514	0.858259	3.23067e-11	1.95827e-09	2.3863e-08	ELP1
ENSG00000108861.8	5.78369	0.361858	1.28508	3.11458e-11	1.89348e-09	2.3863e-08	DUSP3
ENSG00000166685.11	4.8864	-0.234039	0.850251	2.96688e-11	1.8105e-09	2.3863e-08	COG1
ENSG00000180769.8	-0.571409	0.730968	1.65975	3.26636e-11	1.97811e-09	2.3863e-08	WDFY3-AS2
ENSG00000006194.9	5.66717	-0.190502	0.876301	3.80311e-11	2.27546e-09	2.67454e-08	ZNF263
ENSG00000068878.14	7.67735	0.333972	1.26048	7.22945e-11	4.01754e-09	2.67454e-08	PSME4
ENSG00000082074.15	8.85305	0.316468	1.24528	3.8115e-11	2.28005e-09	2.67454e-08	FYB1
ENSG00000086065.13	4.45344	0.549224	1.4633	6.52257e-11	3.67875e-09	2.67454e-08	CHMP5
ENSG00000092841.18	8.00566	0.453948	1.36978	3.27419e-11	1.98245e-09	2.67454e-08	MYL6
ENSG00000096093.15	4.07858	-0.324578	0.798532	6.77704e-11	3.80187e-09	2.67454e-08	EFHC1
ENSG00000099985.3	2.75737	0.737088	1.66681	5.92114e-11	3.38244e-09	2.67454e-08	OSM
ENSG00000105048.16	0.893197	1.08768	2.12531	7.62214e-11	4.20149e-09	2.67454e-08	TNNT1
ENSG00000112297.14	7.9078	0.177236	1.13072	4.4331e-11	2.61553e-09	2.67454e-08	CRYBG1
ENSG00000113812.13	5.42022	-0.174278	0.886211	5.60281e-11	3.2225e-09	2.67454e-08	ACTR8
ENSG00000116478.11	6.80054	-0.191591	0.87564	7.55041e-11	4.16811e-09	2.67454e-08	HDAC1
ENSG00000119950.20	8.43097	0.825646	1.77233	7.93407e-11	4.34549e-09	2.67454e-08	MXI1
ENSG00000121060.16	8.34282	0.526996	1.44093	4.4388e-11	2.61856e-09	2.67454e-08	TRIM25
ENSG00000129757.12	3.90617	-0.837054	0.559785	6.65595e-11	3.74344e-09	2.67454e-08	CDKN1C
ENSG00000130340.15	4.75423	-0.33164	0.794633	4.85514e-11	2.83811e-09	2.67454e-08	SNX9
ENSG00000132912.12	6.44579	0.224028	1.16799	5.93493e-11	3.38932e-09	2.67454e-08	DCTN4
ENSG00000133302.12	4.99211	0.385334	1.30616	7.52404e-11	4.15582e-09	2.67454e-08	SLF1
ENSG00000133742.13	6.77445	1.2207	2.3306	6.88803e-11	3.85516e-09	2.67454e-08	CA1
ENSG00000143452.15	2.46424	0.677796	1.59969	3.50157e-11	2.10927e-09	2.67454e-08	HORMAD1
ENSG00000143727.15	6.1859	0.402222	1.32154	5.34531e-11	3.09152e-09	2.67454e-08	ACP1
ENSG00000157551.17	8.2307	0.733329	1.66247	6.54425e-11	3.68929e-09	2.67454e-08	KCNJ15
ENSG00000163565.18	7.8816	0.36543	1.28827	6.51218e-11	3.6737e-09	2.67454e-08	IFI16
ENSG00000164124.10	3.86889	0.672339	1.59365	5.89076e-11	3.36727e-09	2.67454e-08	TMEM144
ENSG00000164821.4	1.98117	1.35314	2.55468	8.16848e-11	4.45251e-09	2.67454e-08	DEFA4
ENSG00000165185.14	3.47378	0.426998	1.34443	5.637e-11	3.23979e-09	2.67454e-08	KIAA1958
ENSG00000166123.13	0.684277	-0.704732	0.613556	8.10177e-11	4.42216e-09	2.67454e-08	GPT2
ENSG00000167261.13	6.80831	-0.528654	0.693201	6.1663e-11	3.50414e-09	2.67454e-08	DPEP2
ENSG00000170525.19	6.17689	0.596579	1.51213	5.58417e-11	3.21307e-09	2.67454e-08	PFKFB3
ENSG00000172936.12	6.89645	0.441134	1.35767	7.84236e-11	4.30335e-09	2.67454e-08	MYD88
ENSG00000175556.16	3.84644	0.320322	1.24861	4.74663e-11	2.78127e-09	2.67454e-08	LONRF3
ENSG00000176293.19	1.53638	-0.763705	0.588982	4.80359e-11	2.81114e-09	2.67454e-08	ZNF135
ENSG00000177868.11	4.13955	0.556229	1.47042	5.99557e-11	3.41952e-09	2.67454e-08	SVBP
ENSG00000180611.6	2.20871	0.546618	1.46066	8.14574e-11	4.44217e-09	2.67454e-08	MB21D2
ENSG00000181016.9	3.39299	0.575601	1.4903	4.2362e-11	2.51026e-09	2.67454e-08	LSMEM1
ENSG00000184867.13	1.91213	-0.548429	0.683764	6.1492e-11	3.49569e-09	2.67454e-08	ARMCX2
ENSG00000185344.13	5.98417	-0.183401	0.880625	6.84899e-11	3.83644e-09	2.67454e-08	ATP6V0A2
ENSG00000196159.11	2.28671	-0.86252	0.549991	5.26685e-11	3.05132e-09	2.67454e-08	FAT4
ENSG00000198838.13	0.538905	-0.982115	0.506237	4.39022e-11	2.59268e-09	2.67454e-08	RYR3
ENSG00000198912.10	4.70057	-0.212903	0.8628	5.48472e-11	3.16261e-09	2.67454e-08	C1orf174
ENSG00000203867.7	-1.0275	-0.743249	0.597392	6.97281e-11	3.8957e-09	2.67454e-08	RBM20
ENSG00000204257.14	5.57436	-0.358738	0.779846	4.1446e-11	2.46098e-09	2.67454e-08	HLA-DMA
ENSG00000204560.9	6.15313	-0.299926	0.812294	3.79656e-11	2.27187e-09	2.67454e-08	DHX16
ENSG00000204852.15	3.85561	-0.445927	0.734112	4.40989e-11	2.60317e-09	2.67454e-08	TCTN1
ENSG00000222898.1	0.571446	0.678266	1.60022	5.88486e-11	3.36432e-09	2.67454e-08	RN7SKP97
ENSG00000242258.1	0.725951	-0.670608	0.628242	7.03822e-11	3.92688e-09	2.67454e-08	LINC00996
ENSG00000242616.3	-0.167496	0.699085	1.62348	4.49991e-11	2.65104e-09	2.67454e-08	GNG10
ENSG00000246363.2	0.918529	-1.10568	0.464685	4.06589e-11	2.41846e-09	2.67454e-08	LINC02458
ENSG00000250616.2	4.25592	-0.666584	0.629997	5.95389e-11	3.39877e-09	2.67454e-08	YPEL3-DT
ENSG00000250687.6	-0.156996	0.798497	1.73929	7.29411e-11	4.04803e-09	2.67454e-08	NAIPP1
ENSG00000251473.2	-1.6135	0.632857	1.55063	3.40271e-11	2.0543e-09	2.67454e-08
ENSG00000262370.5	4.43651	-0.554636	0.680829	7.87271e-11	4.31731e-09	2.67454e-08
ENSG00000265888.1	-1.48411	0.627933	1.54535	8.03171e-11	4.39019e-09	2.67454e-08	DSCAS
ENSG00000265972.5	11.7001	-0.307448	0.80807	5.92893e-11	3.38633e-09	2.67454e-08	TXNIP
ENSG00000268734.1	2.33449	0.638605	1.55682	6.20164e-11	3.52158e-09	2.67454e-08
ENSG00000270133.1	1.44536	0.477386	1.39222	8.04075e-11	4.39432e-09	2.67454e-08
ENSG00000272602.5	3.20602	-0.652479	0.636186	6.2698e-11	3.55513e-09	2.67454e-08	ZNF595
ENSG00000112299.7	5.18956	0.779783	1.71687	9.07493e-11	4.89709e-09	4.95051e-08	VNN1
ENSG00000126861.4	1.24624	0.634704	1.55262	8.35756e-11	4.54552e-09	4.95051e-08	OMG
ENSG00000130826.17	4.86381	-0.243571	0.844652	8.18221e-11	4.45874e-09	4.95051e-08	DKC1
ENSG00000132906.17	4.20786	-0.368691	0.774485	9.90352e-11	5.29639e-09	4.95051e-08	CASP9
ENSG00000166446.14	4.06194	0.305366	1.23573	9.15453e-11	4.93576e-09	4.95051e-08	CDYL2
ENSG00000167536.13	5.20763	0.511891	1.42592	9.36138e-11	5.03594e-09	4.95051e-08	DHRS13
ENSG00000167664.8	2.45137	-0.77623	0.583891	9.87072e-11	5.28071e-09	4.95051e-08	TMIGD2
ENSG00000181894.14	4.0053	-0.331469	0.794727	8.80548e-11	4.76568e-09	4.95051e-08	ZNF329
ENSG00000196419.12	7.27677	-0.341563	0.789186	9.41375e-11	5.06124e-09	4.95051e-08	XRCC6
ENSG00000229677.1	2.68208	0.438635	1.35532	9.75098e-11	5.22341e-09	4.95051e-08	RPL17P28
ENSG00000275371.1	0.943381	-0.751013	0.594186	9.52839e-11	5.1165e-09	4.95051e-08
ENSG00000135108.14	5.50828	-0.244185	0.844293	1.11798e-10	5.93171e-09	8.7404e-08	FBXO21
ENSG00000156136.9	5.79557	0.327584	1.25491	1.11606e-10	5.92226e-09	8.7404e-08	DCK
ENSG00000156471.12	6.68318	-0.198445	0.871489	1.02482e-10	5.46838e-09	8.7404e-08	PTDSS1
ENSG00000204599.14	4.42436	-0.208472	0.865453	9.93539e-11	5.3116e-09	8.7404e-08	TRIM39
ENSG00000255833.1	0.809639	-0.661117	0.632389	1.11865e-10	5.93505e-09	8.7404e-08	TIFAB
ENSG00000034713.7	6.54606	0.56246	1.47678	1.26954e-10	6.67534e-09	8.88338e-08	GABARAPL2
ENSG00000055332.16	6.72935	0.605158	1.52115	1.37309e-10	7.17583e-09	8.88338e-08	EIF2AK2
ENSG00000069974.15	6.82543	0.281118	1.21514	1.28701e-10	6.76021e-09	8.88338e-08	RAB27A
ENSG00000106638.15	4.43852	-0.226844	0.854502	1.19397e-10	6.30619e-09	8.88338e-08	TBL2
ENSG00000108651.9	5.89859	-0.185303	0.879464	1.24e-10	6.53142e-09	8.88338e-08	UTP6
ENSG00000115241.10	5.50854	-0.317987	0.802188	1.32671e-10	6.95241e-09	8.88338e-08	PPM1G
ENSG00000124785.8	-0.171779	0.96394	1.95063	1.26369e-10	6.64688e-09	8.88338e-08	NRN1
ENSG00000153814.11	6.24252	0.635263	1.55322	1.13424e-10	6.01205e-09	8.88338e-08	JAZF1
ENSG00000177374.12	1.79379	-0.64185	0.640891	1.35129e-10	7.07098e-09	8.88338e-08	HIC1
ENSG00000012983.11	5.93635	0.309513	1.23929	2.04193e-10	1.02797e-08	9.18774e-08	MAP4K5
ENSG00000062524.15	2.35373	-0.858913	0.551368	1.85523e-10	9.43639e-09	9.18774e-08	LTK
ENSG00000124588.19	5.8811	0.556667	1.47087	1.70536e-10	8.74667e-09	9.18774e-08	NQO2
ENSG00000132792.18	5.2041	-0.230178	0.85253	1.87418e-10	9.52276e-09	9.18774e-08	CTNNBL1
ENSG00000135045.6	3.07294	0.499435	1.41366	2.00793e-10	1.01275e-08	9.18774e-08	C9orf40
ENSG00000137831.14	1.91394	0.587176	1.5023	1.87201e-10	9.51288e-09	9.18774e-08	UACA
ENSG00000138496.16	7.55805	0.525265	1.4392	2.00514e-10	1.01149e-08	9.18774e-08	PARP9
ENSG00000144354.13	1.53302	0.538378	1.45234	1.89883e-10	9.63489e-09	9.18774e-08	CDCA7
ENSG00000147894.14	7.7729	0.450812	1.36681	1.88102e-10	9.55392e-09	9.18774e-08	C9orf72
ENSG00000149534.8	1.59298	-1.38485	0.38293	1.54826e-10	8.01114e-09	9.18774e-08	MS4A2
ENSG00000150048.10	1.7742	0.581872	1.49679	1.70587e-10	8.74903e-09	9.18774e-08	CLEC1A
ENSG00000151923.17	5.69373	0.28872	1.22156	1.73822e-10	8.89889e-09	9.18774e-08	TIAL1
ENSG00000158006.13	5.03498	-0.280923	0.823064	1.39163e-10	7.26481e-09	9.18774e-08	PAFAH2
ENSG00000163950.12	5.44456	-0.235262	0.849531	1.95851e-10	9.90507e-09	9.18774e-08	SLBP
ENSG00000164398.12	3.73514	0.455738	1.37148	1.84071e-10	9.37005e-09	9.18774e-08	ACSL6
ENSG00000183691.4	1.58714	-1.10609	0.46455	1.74143e-10	8.91373e-09	9.18774e-08	NOG
ENSG00000186431.18	5.20989	0.624913	1.54212	1.8554e-10	9.43717e-09	9.18774e-08	FCAR
ENSG00000188021.8	5.38662	0.222642	1.16687	1.79359e-10	9.1541e-09	9.18774e-08	UBQLN2
ENSG00000226057.6	-0.518109	0.764641	1.69895	1.46169e-10	7.60028e-09	9.18774e-08	PHF2P2
ENSG00000253230.8	-1.98091	0.657635	1.57749	1.69073e-10	8.67873e-09	9.18774e-08	MIR124-1HG
ENSG00000254288.1	0.24863	0.742172	1.67269	1.94313e-10	9.83561e-09	9.18774e-08
ENSG00000274929.1	2.47158	0.400483	1.31995	1.96326e-10	9.92651e-09	9.18774e-08
ENSG00000171658.8	-0.948322	0.721675	1.64909	2.04238e-10	1.02818e-08	1.01101e-07	NMRAL2P
ENSG00000057657.15	5.5779	0.323252	1.25115	2.69569e-10	1.32379e-08	1.3287e-07	PRDM1
ENSG00000059804.15	8.37809	0.489802	1.40425	2.79813e-10	1.36891e-08	1.3287e-07	SLC2A3
ENSG00000069248.11	6.05949	-0.164778	0.892066	4.06671e-10	1.90075e-08	1.3287e-07	NUP133
ENSG00000080819.6	4.5896	0.212914	1.15903	4.15302e-10	1.93521e-08	1.3287e-07	CPOX
ENSG00000085491.15	5.78342	0.278248	1.21272	2.77545e-10	1.35895e-08	1.3287e-07	SLC25A24
ENSG00000090376.10	8.11843	0.469239	1.38438	3.73544e-10	1.7665e-08	1.3287e-07	IRAK3
ENSG00000100207.18	7.12871	-0.268088	0.830419	2.96435e-10	1.44141e-08	1.3287e-07	TCF20
ENSG00000102524.11	6.61201	0.519802	1.43376	4.44435e-10	2.05002e-08	1.3287e-07	TNFSF13B
ENSG00000106484.14	2.18023	-0.506406	0.703974	4.17027e-10	1.94207e-08	1.3287e-07	MEST
ENSG00000109684.14	0.671104	-0.820703	0.566166	3.87422e-10	1.82312e-08	1.3287e-07	CLNK
ENSG00000110107.8	5.35033	-0.32511	0.798237	3.73353e-10	1.76572e-08	1.3287e-07	PRPF19
ENSG00000111237.18	5.83023	0.284589	1.21806	2.07493e-10	1.04288e-08	1.3287e-07	VPS29
ENSG00000112118.18	5.41241	-0.304771	0.809571	4.34884e-10	2.01264e-08	1.3287e-07	MCM3
ENSG00000113520.10	-1.16785	-0.806236	0.571872	3.65559e-10	1.73366e-08	1.3287e-07	IL4
ENSG00000116678.19	3.98949	0.574689	1.48936	3.70189e-10	1.75273e-08	1.3287e-07	LEPR
ENSG00000116717.11	2.82328	0.501141	1.41533	2.16541e-10	1.08464e-08	1.3287e-07	GADD45A
ENSG00000117748.9	5.80866	-0.236764	0.848647	4.37115e-10	2.02139e-08	1.3287e-07	RPA2
ENSG00000119686.9	4.02905	0.421868	1.33966	3.27112e-10	1.57292e-08	1.3287e-07	FLVCR2
ENSG00000123610.4	4.3299	0.859295	1.81415	4.49545e-10	2.06992e-08	1.3287e-07	TNFAIP6
ENSG00000130433.7	0.715694	-0.971355	0.510027	3.84104e-10	1.80964e-08	1.3287e-07	CACNG6
ENSG00000131981.15	6.294	0.687895	1.61093	4.48983e-10	2.06774e-08	1.3287e-07	LGALS3
ENSG00000135049.15	8.10121	0.332496	1.25919	3.14787e-10	1.52043e-08	1.3287e-07	AGTPBP1
ENSG00000135272.10	6.3117	0.303946	1.23452	3.46797e-10	1.65577e-08	1.3287e-07	MDFIC
ENSG00000137936.16	0.475321	-0.588095	0.665221	3.83755e-10	1.80821e-08	1.3287e-07	BCAR3
ENSG00000139636.15	6.01322	-0.250441	0.84064	3.04438e-10	1.476e-08	1.3287e-07	LMBR1L
ENSG00000145431.10	2.72581	0.449834	1.36588	3.83795e-10	1.80838e-08	1.3287e-07	PDGFC
ENSG00000146007.10	6.47401	0.498306	1.41255	2.61855e-10	1.28958e-08	1.3287e-07	ZMAT2
ENSG00000147394.18	5.50088	-0.585559	0.666391	2.26664e-10	1.13103e-08	1.3287e-07	ZNF185
ENSG00000147408.14	5.62357	0.440507	1.35708	4.0738e-10	1.90358e-08	1.3287e-07	CSGALNACT1
ENSG00000149792.8	4.9287	-0.242609	0.845216	4.11335e-10	1.9194e-08	1.3287e-07	MRPL49
ENSG00000154734.14	3.20491	-0.728626	0.603478	3.85652e-10	1.81593e-08	1.3287e-07	ADAMTS1
ENSG00000155367.15	-0.443812	-0.664655	0.630839	2.99378e-10	1.45415e-08	1.3287e-07	PPM1J
ENSG00000155657.26	8.37757	-0.595841	0.661659	2.17536e-10	1.08921e-08	1.3287e-07	TTN
ENSG00000163492.14	4.9148	-0.564977	0.675966	2.78379e-10	1.36261e-08	1.3287e-07	CCDC141
ENSG00000167633.18	0.666508	-1.04716	0.483921	3.16699e-10	1.5286e-08	1.3287e-07	KIR3DL1
ENSG00000170515.13	4.71653	0.385209	1.30605	4.08571e-10	1.90835e-08	1.3287e-07	PA2G4
ENSG00000171291.8	4.4015	-0.414814	0.750116	4.40963e-10	2.03646e-08	1.3287e-07	ZNF439
ENSG00000171766.15	1.7931	-0.662019	0.631993	4.04498e-10	1.89204e-08	1.3287e-07	GATM
ENSG00000172493.20	7.70008	0.320566	1.24882	3.44558e-10	1.64641e-08	1.3287e-07	AFF1
ENSG00000177565.16	7.91129	0.246746	1.18653	3.64228e-10	1.72817e-08	1.3287e-07	TBL1XR1
ENSG00000179593.15	-0.268583	-0.831109	0.562097	2.30476e-10	1.1484e-08	1.3287e-07	ALOX15B
ENSG00000185271.7	-0.187974	-0.73348	0.601451	2.75938e-10	1.35188e-08	1.3287e-07	KLHL33
ENSG00000196792.11	5.39873	0.229865	1.17273	4.44261e-10	2.04934e-08	1.3287e-07	STRN3
ENSG00000197860.9	5.85814	0.285883	1.21916	2.75913e-10	1.35177e-08	1.3287e-07	SGTB
ENSG00000198814.12	6.76506	0.527777	1.44171	4.13476e-10	1.92794e-08	1.3287e-07	GK
ENSG00000203721.6	2.74595	0.54246	1.45645	2.85312e-10	1.39299e-08	1.3287e-07	LINC00862
ENSG00000213096.10	4.31175	0.480987	1.3957	2.85494e-10	1.39379e-08	1.3287e-07	ZNF254
ENSG00000230817.5	-1.1732	0.726069	1.65413	2.46283e-10	1.21994e-08	1.3287e-07	LINC01362
ENSG00000231233.1	0.992109	0.711293	1.63727	3.73672e-10	1.76702e-08	1.3287e-07	CFAP58-DT
ENSG00000241258.6	4.87437	-0.195796	0.873091	2.44061e-10	1.20993e-08	1.3287e-07	CRCP
ENSG00000243806.1	1.35396	0.682427	1.60484	2.5139e-10	1.24287e-08	1.3287e-07	RPL7P18
ENSG00000251429.1	0.650881	0.756952	1.68992	4.09442e-10	1.91184e-08	1.3287e-07	AIDAP2
ENSG00000251442.5	2.43675	0.577803	1.49257	3.29524e-10	1.58313e-08	1.3287e-07	LINC01094
ENSG00000259956.1	6.34754	-0.19679	0.87249	3.04396e-10	1.47582e-08	1.3287e-07	RBM15B
ENSG00000261253.2	0.856478	-0.806147	0.571907	3.75821e-10	1.77583e-08	1.3287e-07
ENSG00000262636.1	0.283918	0.74148	1.67189	4.19122e-10	1.9504e-08	1.3287e-07
ENSG00000278829.1	4.28209	0.33443	1.26088	2.32962e-10	1.15971e-08	1.3287e-07
ENSG00000047597.5	6.1811	0.925591	1.89946	4.90333e-10	2.23367e-08	1.76915e-07	XK
ENSG00000099337.4	4.52733	-0.281076	0.822977	5.07595e-10	2.30208e-08	1.76915e-07	KCNK6
ENSG00000111249.13	-0.168399	-0.711322	0.61076	4.94953e-10	2.25204e-08	1.76915e-07	CUX2
ENSG00000112511.17	5.13898	-0.303928	0.810044	4.81934e-10	2.20017e-08	1.76915e-07	PHF1
ENSG00000114993.16	-0.164802	-0.684189	0.622355	5.28922e-10	2.38575e-08	1.76915e-07	RTKN
ENSG00000139517.7	4.4999	0.304592	1.23507	5.37924e-10	2.4208e-08	1.76915e-07	LNX2
ENSG00000142444.6	4.18906	-0.23966	0.846945	5.51367e-10	2.47284e-08	1.76915e-07	TIMM29
ENSG00000143797.11	6.9971	0.485014	1.3996	4.9699e-10	2.26012e-08	1.76915e-07	MBOAT2
ENSG00000147202.17	6.02316	0.231368	1.17395	4.78449e-10	2.18623e-08	1.76915e-07	DIAPH2
ENSG00000152332.15	8.3487	0.217019	1.16233	5.39082e-10	2.4253e-08	1.76915e-07	UHMK1
ENSG00000163444.11	5.83185	0.256032	1.19419	5.48472e-10	2.46167e-08	1.76915e-07	TMEM183A
ENSG00000168405.15	5.15433	0.250313	1.18947	4.51322e-10	2.07682e-08	1.76915e-07	CMAHP
ENSG00000182518.13	2.07826	0.486401	1.40095	5.14939e-10	2.33099e-08	1.76915e-07	FAM104B
ENSG00000196455.7	6.29965	-0.135628	0.910274	4.93364e-10	2.24573e-08	1.76915e-07	PIK3R4
ENSG00000233038.5	3.9347	-0.64555	0.639249	5.37258e-10	2.41821e-08	1.76915e-07	PTPRN2-AS1
ENSG00000254420.1	-1.66125	0.527683	1.44161	4.92656e-10	2.24291e-08	1.76915e-07
ENSG00000262879.5	3.43762	-0.326132	0.797672	5.18819e-10	2.34623e-08	1.76915e-07
ENSG00000278434.1	1.45002	-0.526123	0.694418	5.12128e-10	2.31994e-08	1.76915e-07
ENSG00000101161.7	6.29901	-0.36028	0.779014	5.53845e-10	2.4824e-08	2.01439e-07	PRPF6
ENSG00000143149.12	5.81693	-0.251603	0.839962	5.65047e-10	2.52631e-08	2.01439e-07	ALDH9A1
ENSG00000085063.14	5.73508	0.365742	1.28854	6.11867e-10	2.71282e-08	2.51217e-07	CD59
ENSG00000133884.9	5.13339	-0.329836	0.795627	5.83913e-10	2.60172e-08	2.51217e-07	DPF2
ENSG00000164096.12	6.36353	0.271271	1.20687	5.77855e-10	2.5775e-08	2.51217e-07	C4orf3
ENSG00000167264.17	4.72568	-0.291483	0.817062	6.03801e-10	2.68088e-08	2.51217e-07	DUS2
ENSG00000198732.10	-1.19062	-0.627286	0.647393	5.94428e-10	2.64364e-08	2.51217e-07	SMOC1
ENSG00000023902.13	7.26361	-0.301724	0.811283	6.58541e-10	2.89728e-08	2.67952e-07	PLEKHO1
ENSG00000089737.16	6.91745	-0.243449	0.844723	6.81297e-10	2.98623e-08	2.67952e-07	DDX24
ENSG00000103275.19	6.28745	-0.230379	0.852411	6.15343e-10	2.72656e-08	2.67952e-07	UBE2I
ENSG00000118705.16	6.80443	-0.24655	0.842909	6.45458e-10	2.84583e-08	2.67952e-07	RPN2
ENSG00000124490.13	-1.15602	0.792966	1.73263	6.77536e-10	2.97158e-08	2.67952e-07	CRISP2
ENSG00000137996.12	5.21049	0.157364	1.11525	6.75037e-10	2.96183e-08	2.67952e-07	RTCA
ENSG00000182986.12	3.27242	-0.354057	0.782381	6.7447e-10	2.95962e-08	2.67952e-07	ZNF320
ENSG00000277586.2	1.45212	0.862927	1.81872	6.72712e-10	2.95275e-08	2.67952e-07	NEFL
ENSG00000085662.13	4.74037	-0.301072	0.811649	6.84356e-10	2.99814e-08	4.69199e-07	AKR1B1
ENSG00000028839.9	5.11284	0.281316	1.2153	1.27754e-09	5.31918e-08	4.98558e-07	TBPL1
ENSG00000049089.13	2.69539	-0.714572	0.609386	8.2846e-10	3.58378e-08	4.98558e-07	COL9A2
ENSG00000068024.16	7.03909	0.381746	1.30292	1.27968e-09	5.32712e-08	4.98558e-07	HDAC4
ENSG00000087589.16	6.0573	-0.440132	0.737067	7.46105e-10	3.25075e-08	4.98558e-07	CASS4
ENSG00000093167.17	6.4791	0.224208	1.16814	1.106e-09	4.67188e-08	4.98558e-07	LRRFIP2
ENSG00000107290.13	9.64456	-0.209388	0.864904	1.21242e-09	5.07564e-08	4.98558e-07	SETX
ENSG00000115904.12	6.70435	0.228563	1.17167	9.55868e-10	4.08971e-08	4.98558e-07	SOS1
ENSG00000122733.12	0.0313374	-0.885384	0.541343	1.22918e-09	5.13857e-08	4.98558e-07	PHF24
ENSG00000130764.9	5.05444	-0.264577	0.832443	1.08436e-09	4.58887e-08	4.98558e-07	LRRC47
ENSG00000133063.15	2.61962	0.580494	1.49536	1.19707e-09	5.01785e-08	4.98558e-07	CHIT1
ENSG00000136689.18	4.92335	0.542109	1.4561	9.99831e-10	4.26173e-08	4.98558e-07	IL1RN
ENSG00000138756.17	7.50956	0.296596	1.22824	1.07482e-09	4.5522e-08	4.98558e-07	BMP2K
ENSG00000144724.19	0.0784482	-0.835485	0.560394	9.41353e-10	4.03264e-08	4.98558e-07	PTPRG
ENSG00000148154.9	5.71497	0.327776	1.25508	8.49717e-10	3.66897e-08	4.98558e-07	UGCG
ENSG00000150403.17	6.0974	0.286491	1.21967	1.16512e-09	4.89706e-08	4.98558e-07	TMCO3
ENSG00000156381.8	3.97985	0.921377	1.89392	9.94255e-10	4.23999e-08	4.98558e-07	ANKRD9
ENSG00000158715.5	2.34333	-0.978511	0.507503	1.22323e-09	5.11625e-08	4.98558e-07	SLC45A3
ENSG00000168710.17	6.33334	-0.152264	0.899838	8.54986e-10	3.69003e-08	4.98558e-07	AHCYL1
ENSG00000174243.9	6.87455	-0.275469	0.826181	8.81736e-10	3.79669e-08	4.98558e-07	DDX23
ENSG00000176407.17	6.39498	0.167064	1.12277	1.18071e-09	4.95609e-08	4.98558e-07	KCMF1
ENSG00000178752.15	-1.10418	0.958843	1.94375	8.98892e-10	3.86484e-08	4.98558e-07	ERFE
ENSG00000179409.10	4.44665	-0.347451	0.785972	1.17441e-09	4.93226e-08	4.98558e-07	GEMIN4
ENSG00000179639.10	4.2896	-0.858301	0.551602	6.99461e-10	3.06e-08	4.98558e-07	FCER1A
ENSG00000182983.14	1.14503	-0.702798	0.61438	1.16838e-09	4.9094e-08	4.98558e-07	ZNF662
ENSG00000196470.11	5.04451	-0.229703	0.85281	1.08478e-09	4.59049e-08	4.98558e-07	SIAH1
ENSG00000196781.14	3.34743	-0.487498	0.713261	9.83477e-10	4.19789e-08	4.98558e-07	TLE1
ENSG00000197301.7	0.664203	0.583864	1.49886	1.08565e-09	4.59381e-08	4.98558e-07	HMGA2-AS1
ENSG00000198695.2	0.218283	-0.871425	0.546607	1.10379e-09	4.66339e-08	4.98558e-07	MT-ND6
ENSG00000198829.6	1.13885	0.698586	1.62291	1.06339e-09	4.50817e-08	4.98558e-07	SUCNR1
ENSG00000204252.13	5.33952	-0.579624	0.669138	1.0265e-09	4.36546e-08	4.98558e-07	HLA-DOA
ENSG00000225889.7	4.99704	-0.55923	0.678664	1.04587e-09	4.4405e-08	4.98558e-07
ENSG00000229961.2	1.17249	-0.732955	0.60167	1.28395e-09	5.34301e-08	4.98558e-07
ENSG00000232112.3	4.14132	0.616822	1.53349	1.18855e-09	4.98571e-08	4.98558e-07	TMA7
ENSG00000250510.7	2.34138	-0.74933	0.59488	7.64762e-10	3.32662e-08	4.98558e-07	GPR162
ENSG00000261596.2	3.38236	0.388176	1.30874	1.05799e-09	4.48733e-08	4.98558e-07
ENSG00000272625.1	1.95113	0.471497	1.38655	1.04831e-09	4.44992e-08	4.98558e-07
ENSG00000283602.1	2.74249	0.57681	1.49155	1.1293e-09	4.76088e-08	4.98558e-07
ENSG00000090975.12	3.54617	-0.567988	0.674557	1.40658e-09	5.80622e-08	6.43268e-07	PITPNM2
ENSG00000101079.20	5.11151	-0.239543	0.847014	1.61758e-09	6.588e-08	6.43268e-07	NDRG3
ENSG00000101425.12	1.80456	0.900229	1.86636	1.72629e-09	6.9827e-08	6.43268e-07	BPI
ENSG00000105085.10	3.17402	-0.284265	0.82116	1.59312e-09	6.49844e-08	6.43268e-07	MED26
ENSG00000105939.12	8.41124	0.243379	1.18376	1.51262e-09	6.20172e-08	6.43268e-07	ZC3HAV1
ENSG00000106771.12	6.51279	0.230516	1.17325	1.56872e-09	6.40883e-08	6.43268e-07	TMEM245
ENSG00000108312.14	6.18821	-0.264349	0.832574	1.49459e-09	6.13485e-08	6.43268e-07	UBTF
ENSG00000109670.13	7.05096	0.179482	1.13248	1.69422e-09	6.86683e-08	6.43268e-07	FBXW7
ENSG00000114923.16	-0.108622	-0.694511	0.617919	1.47246e-09	6.05257e-08	6.43268e-07	SLC4A3
ENSG00000115170.13	4.16121	0.254502	1.19292	1.56188e-09	6.38364e-08	6.43268e-07	ACVR1
ENSG00000129696.12	4.18698	-0.19125	0.875846	1.62278e-09	6.607e-08	6.43268e-07	TTI2
ENSG00000132170.19	-0.410754	0.667148	1.58793	1.74229e-09	7.04031e-08	6.43268e-07	PPARG
ENSG00000132963.7	4.45331	0.27015	1.20593	1.43362e-09	5.90757e-08	6.43268e-07	POMP
ENSG00000148634.15	7.47888	0.201454	1.14986	1.72128e-09	6.96462e-08	6.43268e-07	HERC4
ENSG00000155090.14	3.41423	0.39743	1.31716	1.29334e-09	5.37787e-08	6.43268e-07	KLF10
ENSG00000172296.12	0.469227	-0.690452	0.61966	1.42751e-09	5.88471e-08	6.43268e-07	SPTLC3
ENSG00000175779.1	0.715671	0.637015	1.55511	1.41044e-09	5.82071e-08	6.43268e-07	LINC02694
ENSG00000196090.12	-1.62169	-0.600505	0.659523	1.66219e-09	6.75062e-08	6.43268e-07	PTPRT
ENSG00000205269.5	6.70356	0.430987	1.34816	1.44194e-09	5.93869e-08	6.43268e-07	TMEM170B
ENSG00000223519.7	0.47997	-0.78384	0.580819	1.38692e-09	5.73228e-08	6.43268e-07	KIF28P
ENSG00000248863.2	2.08854	0.380837	1.3021	1.65882e-09	6.73836e-08	6.43268e-07
ENSG00000253981.5	4.44966	-0.622624	0.649489	1.52296e-09	6.24e-08	6.43268e-07	ALG1L13P
ENSG00000110048.11	5.99751	-0.168048	0.890046	2.05149e-09	8.16691e-08	8.36039e-07	OSBP
ENSG00000115271.10	8.67287	0.533781	1.44772	2.22175e-09	8.77359e-08	8.36039e-07	GCA
ENSG00000115944.14	5.79383	0.210728	1.15727	2.04611e-09	8.14758e-08	8.36039e-07	COX7A2L
ENSG00000123349.13	6.55886	0.555668	1.46985	1.74896e-09	7.06431e-08	8.36039e-07	PFDN5
ENSG00000153113.23	8.0332	0.187482	1.13877	1.77823e-09	7.17238e-08	8.36039e-07	CAST
ENSG00000163827.12	0.0861682	0.837977	1.78754	1.90966e-09	7.65398e-08	8.36039e-07	LRRC2
ENSG00000168291.12	5.54946	-0.170801	0.888349	1.96613e-09	7.85903e-08	8.36039e-07	PDHB
ENSG00000169567.11	5.29444	0.477273	1.39211	1.86918e-09	7.50631e-08	8.36039e-07	HINT1
ENSG00000174946.6	4.15375	0.462195	1.37764	2.2498e-09	8.87258e-08	8.36039e-07	GPR171
ENSG00000184205.14	3.75809	-0.372123	0.772645	2.06305e-09	8.2084e-08	8.36039e-07	TSPYL2
ENSG00000186047.9	0.794693	-0.578802	0.66952	2.1192e-09	8.40936e-08	8.36039e-07	DLEU7
ENSG00000198258.10	5.34396	0.320917	1.24912	2.07489e-09	8.25089e-08	8.36039e-07	UBL5
ENSG00000203710.10	7.88331	0.541665	1.45565	2.23638e-09	8.82527e-08	8.36039e-07	CR1
ENSG00000213281.4	5.91808	0.208569	1.15554	2.25794e-09	8.90129e-08	8.36039e-07	NRAS
ENSG00000214753.2	4.92547	-0.19698	0.872375	2.31488e-09	9.10131e-08	8.36039e-07	HNRNPUL2
ENSG00000223629.1	-1.74706	0.465517	1.38081	2.2338e-09	8.81615e-08	8.36039e-07	DEFA8P
ENSG00000223638.3	-1.79841	-0.489792	0.712128	1.93686e-09	7.7529e-08	8.36039e-07	RFPL4A
ENSG00000234076.1	0.191881	0.662335	1.58264	1.89042e-09	7.58386e-08	8.36039e-07	TPRG1-AS1
ENSG00000242259.8	5.00308	-0.136999	0.909409	1.90769e-09	7.64682e-08	8.36039e-07	C22orf39
ENSG00000254006.5	-1.18108	0.755037	1.68768	2.30471e-09	9.06565e-08	8.36039e-07
ENSG00000265354.3	4.35591	0.255236	1.19353	2.32195e-09	9.12608e-08	8.36039e-07	TIMM23
ENSG00000279447.1	3.08226	-0.724509	0.605203	2.06826e-09	8.22712e-08	8.36039e-07
ENSG00000109790.16	5.53874	0.270082	1.20588	2.40287e-09	9.41249e-08	9.86828e-07	KLHL5
ENSG00000119771.14	0.338189	-0.685318	0.621869	2.67549e-09	1.03682e-07	9.86828e-07	KLHL29
ENSG00000126822.16	8.21899	-0.489722	0.712162	2.54951e-09	9.92911e-08	9.86828e-07	PLEKHG3
ENSG00000139687.13	6.26803	0.231946	1.17442	2.42822e-09	9.50223e-08	9.86828e-07	RB1
ENSG00000141469.16	5.97017	0.746557	1.67778	2.48229e-09	9.69302e-08	9.86828e-07	SLC14A1
ENSG00000141570.10	2.12511	-0.431077	0.741708	2.34111e-09	9.1931e-08	9.86828e-07	CBX8
ENSG00000143878.9	6.70235	-0.467922	0.723005	2.48956e-09	9.71861e-08	9.86828e-07	RHOB
ENSG00000153936.16	4.74551	0.256195	1.19432	2.63728e-09	1.02355e-07	9.86828e-07	HS2ST1
ENSG00000163687.13	0.0717941	-0.666705	0.629944	2.62298e-09	1.01857e-07	9.86828e-07	DNASE1L3
ENSG00000166704.11	4.28334	-0.24394	0.844436	2.66978e-09	1.03484e-07	9.86828e-07	ZNF606
ENSG00000204455.7	-1.11428	-0.77848	0.582981	2.7111e-09	1.04915e-07	9.86828e-07	TRIM51BP
ENSG00000249993.1	-0.479688	-0.621449	0.650018	2.67655e-09	1.03719e-07	9.86828e-07	BFSP2-AS1
ENSG00000004455.16	6.62475	-0.11927	0.920653	3.90141e-09	1.45318e-07	1.18489e-06	AK2
ENSG00000073737.16	5.16693	-0.640094	0.641671	3.99715e-09	1.48437e-07	1.18489e-06	DHRS9
ENSG00000099910.16	5.2267	-0.266701	0.831218	3.15883e-09	1.20471e-07	1.18489e-06	KLHL22
ENSG00000100554.11	5.26428	0.276203	1.211	2.72236e-09	1.05304e-07	1.18489e-06	ATP6V1D
ENSG00000102870.5	2.7162	-0.385334	0.765602	3.72333e-09	1.39466e-07	1.18489e-06	ZNF629
ENSG00000106003.12	7.35956	-0.411953	0.751605	3.40292e-09	1.28768e-07	1.18489e-06	LFNG
ENSG00000112406.4	8.02783	0.185171	1.13695	2.98493e-09	1.1448e-07	1.18489e-06	HECA
ENSG00000113712.17	6.69693	0.143959	1.10493	3.80038e-09	1.42006e-07	1.18489e-06	CSNK1A1
ENSG00000115526.10	1.5238	-0.468995	0.722468	3.11775e-09	1.19062e-07	1.18489e-06	CHST10
ENSG00000117091.9	8.0355	0.2654	1.20197	3.59154e-09	1.35092e-07	1.18489e-06	CD48
ENSG00000119487.16	6.34942	-0.143371	0.905401	3.83629e-09	1.43186e-07	1.18489e-06	MAPKAP1
ENSG00000121671.11	5.41273	-0.274902	0.826507	2.9728e-09	1.14059e-07	1.18489e-06	CRY2
ENSG00000123240.16	7.1615	0.543145	1.45715	3.9615e-09	1.47278e-07	1.18489e-06	OPTN
ENSG00000127184.12	5.11998	0.527845	1.44177	3.34574e-09	1.26836e-07	1.18489e-06	COX7C
ENSG00000129103.17	5.82436	-0.248491	0.841776	4.06454e-09	1.50622e-07	1.18489e-06	SUMF2
ENSG00000130147.15	1.18038	-0.533259	0.690992	3.1633e-09	1.20624e-07	1.18489e-06	SH3BP4
ENSG00000132002.7	5.89871	-0.248877	0.841551	3.81767e-09	1.42574e-07	1.18489e-06	DNAJB1
ENSG00000138623.9	3.64001	-0.58534	0.666492	4.04603e-09	1.50023e-07	1.18489e-06	SEMA7A
ENSG00000155959.10	4.2116	0.446988	1.36319	3.22837e-09	1.22848e-07	1.18489e-06	VBP1
ENSG00000156411.9	4.13381	0.416471	1.33466	3.13129e-09	1.19527e-07	1.18489e-06	ATP5MJ
ENSG00000156735.10	4.61267	0.260184	1.19763	3.70065e-09	1.38716e-07	1.18489e-06	BAG4
ENSG00000159140.19	9.47557	-0.120126	0.920108	4.03592e-09	1.49695e-07	1.18489e-06	SON
ENSG00000163710.7	-1.23555	0.737552	1.66734	3.68991e-09	1.3836e-07	1.18489e-06	PCOLCE2
ENSG00000165476.13	4.66247	0.289236	1.22199	3.24445e-09	1.23397e-07	1.18489e-06	REEP3
ENSG00000166974.12	6.23512	-0.176325	0.884955	3.46711e-09	1.30929e-07	1.18489e-06	MAPRE2
ENSG00000182544.8	4.55736	-0.305546	0.809136	2.83727e-09	1.09339e-07	1.18489e-06	MFSD5
ENSG00000184900.15	3.93571	0.263645	1.20051	3.47865e-09	1.31317e-07	1.18489e-06	SUMO3
ENSG00000185897.6	-1.27357	0.652609	1.57201	3.22524e-09	1.22741e-07	1.18489e-06	FFAR3
ENSG00000211445.11	-0.0514934	-0.742326	0.597775	3.74265e-09	1.40104e-07	1.18489e-06	GPX3
ENSG00000219626.8	4.0962	0.217175	1.16245	3.90944e-09	1.4558e-07	1.18489e-06	FAM228B
ENSG00000225885.6	-0.394186	-0.662302	0.631869	3.19711e-09	1.21781e-07	1.18489e-06
ENSG00000237765.6	4.97692	0.394029	1.31406	3.08206e-09	1.17834e-07	1.18489e-06	FAM200B
ENSG00000251348.1	0.740542	-0.5948	0.662136	3.65709e-09	1.37272e-07	1.18489e-06	HSPD1P11
ENSG00000272341.1	2.02187	0.41091	1.32952	3.00104e-09	1.15038e-07	1.18489e-06
ENSG00000277301.1	0.969187	-0.776406	0.583819	3.95678e-09	1.47125e-07	1.18489e-06
ENSG00000280650.1	-1.26433	0.872636	1.83101	3.9706e-09	1.47574e-07	1.18489e-06	KCNIP4-IT1
ENSG00000058335.15	-1.23979	-0.822242	0.565563	4.91028e-09	1.77881e-07	1.37355e-06	RASGRF1
ENSG00000066279.17	2.96555	0.547116	1.46116	4.90834e-09	1.77819e-07	1.37355e-06	ASPM
ENSG00000077984.5	4.56694	0.564617	1.47899	4.34391e-09	1.59749e-07	1.37355e-06	CST7
ENSG00000089486.16	3.14946	-0.469352	0.722289	4.28935e-09	1.57974e-07	1.37355e-06	CDIP1
ENSG00000113300.11	6.03145	0.198982	1.14789	4.9201e-09	1.7819e-07	1.37355e-06	CNOT6
ENSG00000118816.9	8.34069	0.476169	1.39104	4.54925e-09	1.66386e-07	1.37355e-06	CCNI
ENSG00000121552.3	4.03898	0.588858	1.50406	4.36971e-09	1.60587e-07	1.37355e-06	CSTA
ENSG00000127311.9	7.29517	0.225043	1.16881	4.50028e-09	1.6481e-07	1.37355e-06	HELB
ENSG00000131401.11	5.35581	-0.66667	0.629959	4.40076e-09	1.61594e-07	1.37355e-06	NAPSB
ENSG00000144848.10	6.19808	0.319545	1.24794	4.67071e-09	1.70278e-07	1.37355e-06	ATG3
ENSG00000158813.17	1.90704	0.716899	1.64365	4.63789e-09	1.69229e-07	1.37355e-06	EDA
ENSG00000162433.14	0.228234	0.606843	1.52292	4.19954e-09	1.55039e-07	1.37355e-06	AK4
ENSG00000165061.14	-0.290617	-0.968349	0.511091	4.78154e-09	1.73807e-07	1.37355e-06	ZMAT4
ENSG00000168439.16	5.66304	-0.300135	0.812176	4.09565e-09	1.51627e-07	1.37355e-06	STIP1
ENSG00000175130.6	2.7266	-0.400279	0.757712	4.18062e-09	1.54419e-07	1.37355e-06	MARCKSL1
ENSG00000175582.19	6.77321	0.284817	1.21826	4.79304e-09	1.74172e-07	1.37355e-06	RAB6A
ENSG00000188822.7	4.06637	-0.510905	0.701782	4.92788e-09	1.78435e-07	1.37355e-06	CNR2
ENSG00000248334.6	3.42083	-0.414857	0.750094	4.65012e-09	1.6962e-07	1.37355e-06	WHAMMP2
ENSG00000251682.1	4.009	0.397121	1.31688	4.69994e-09	1.71211e-07	1.37355e-06
ENSG00000095787.21	7.94591	0.179497	1.13249	5.97194e-09	2.10506e-07	1.38788e-06	WAC
ENSG00000102038.15	-0.778284	-0.717507	0.608147	5.01344e-09	1.81129e-07	1.38788e-06	SMARCA1
ENSG00000107864.14	3.74937	0.263284	1.20021	5.10781e-09	1.84086e-07	1.38788e-06	CPEB3
ENSG00000109436.7	5.69558	-0.326248	0.797608	5.8768e-09	2.07654e-07	1.38788e-06	TBC1D9
ENSG00000116863.10	4.8812	-0.37396	0.771662	5.5646e-09	1.98198e-07	1.38788e-06	ADPRS
ENSG00000118680.12	7.57653	0.269964	1.20578	6.04388e-09	2.12653e-07	1.38788e-06	MYL12B
ENSG00000125498.19	-0.393491	-0.793944	0.576765	5.83375e-09	2.06359e-07	1.38788e-06	KIR2DL1
ENSG00000137497.17	8.00908	-0.314048	0.804382	4.93585e-09	1.78686e-07	1.38788e-06	NUMA1
ENSG00000145495.15	7.97238	0.1984	1.14742	5.97841e-09	2.10699e-07	1.38788e-06	MARCHF6
ENSG00000148344.10	-0.271545	-0.834056	0.56095	5.59871e-09	1.99238e-07	1.38788e-06	PTGES
ENSG00000161526.14	6.2032	-0.193508	0.874477	5.96645e-09	2.10341e-07	1.38788e-06	SAP30BP
ENSG00000162551.13	5.69518	0.858494	1.81315	5.39879e-09	1.93114e-07	1.38788e-06	ALPL
ENSG00000163512.13	5.03312	0.382027	1.30317	5.45431e-09	1.94821e-07	1.38788e-06	AZI2
ENSG00000165704.14	1.91251	0.39249	1.31266	5.81182e-09	2.05698e-07	1.38788e-06	HPRT1
ENSG00000168389.17	2.26021	-0.479034	0.717458	5.88861e-09	2.08008e-07	1.38788e-06	MFSD2A
ENSG00000171155.7	4.03126	0.356399	1.28023	5.68579e-09	2.01886e-07	1.38788e-06	C1GALT1C1
ENSG00000172349.17	9.31564	-0.210869	0.864016	5.21992e-09	1.8758e-07	1.38788e-06	IL16
ENSG00000174125.7	8.73659	0.427917	1.34529	5.79124e-09	2.05077e-07	1.38788e-06	TLR1
ENSG00000188641.12	8.69792	0.251236	1.19023	5.39723e-09	1.93066e-07	1.38788e-06	DPYD
ENSG00000196123.12	1.78007	0.428788	1.3461	5.47432e-09	1.95435e-07	1.38788e-06	MATCAP1
ENSG00000197601.12	7.30209	0.346365	1.27135	5.47133e-09	1.95343e-07	1.38788e-06	FAR1
ENSG00000236333.3	-0.447618	0.846465	1.79809	5.93821e-09	2.09496e-07	1.38788e-06	TRHDE-AS1
ENSG00000254275.6	0.616878	0.862518	1.81821	5.49662e-09	1.96118e-07	1.38788e-06	LINC00824
ENSG00000254946.1	-1.84792	0.348652	1.27337	5.64775e-09	2.00731e-07	1.38788e-06	LINC02751
ENSG00000272825.1	2.24663	0.413887	1.33227	5.63358e-09	2.003e-07	1.38788e-06
ENSG00000133872.13	8.55681	-0.218491	0.859464	6.12772e-09	2.15242e-07	1.81811e-06	SARAF
ENSG00000150540.13	4.03158	0.468604	1.38377	6.05291e-09	2.12922e-07	1.81811e-06	HNMT
ENSG00000054523.17	6.62451	0.401956	1.3213	8.47166e-09	2.88161e-07	2.53827e-06	KIF1B
ENSG00000066135.12	6.43101	-0.191331	0.875797	8.24302e-09	2.81246e-07	2.53827e-06	KDM4A
ENSG00000067064.10	5.288	0.388506	1.30904	7.49355e-09	2.58276e-07	2.53827e-06	IDI1
ENSG00000077238.13	7.93539	0.431963	1.34907	8.53235e-09	2.8999e-07	2.53827e-06	IL4R
ENSG00000078053.16	-0.984293	0.644515	1.56321	6.44375e-09	2.25305e-07	2.53827e-06	AMPH
ENSG00000082014.16	4.05599	0.453729	1.36958	7.46904e-09	2.57517e-07	2.53827e-06	SMARCD3
ENSG00000100605.16	6.54061	-0.533553	0.690851	8.55884e-09	2.90787e-07	2.53827e-06	ITPK1
ENSG00000106952.7	5.66761	0.242503	1.18304	8.41121e-09	2.86337e-07	2.53827e-06	TNFSF8
ENSG00000109046.14	8.03854	0.282319	1.21615	6.77901e-09	2.35938e-07	2.53827e-06	WSB1
ENSG00000116337.15	7.19827	-0.536886	0.689257	8.33433e-09	2.84013e-07	2.53827e-06	AMPD2
ENSG00000116489.12	7.99012	0.343802	1.2691	7.37543e-09	2.54613e-07	2.53827e-06	CAPZA1
ENSG00000127903.13	1.34828	-0.620222	0.650571	7.69918e-09	2.64625e-07	2.53827e-06	ZNF835
ENSG00000133317.14	3.05651	-0.646291	0.638921	6.16998e-09	2.16549e-07	2.53827e-06	LGALS12
ENSG00000134489.6	3.35555	-0.717859	0.607999	7.53575e-09	2.59582e-07	2.53827e-06	HRH4
ENSG00000135392.15	4.91598	-0.186332	0.878837	7.39841e-09	2.55327e-07	2.53827e-06	DNAJC14
ENSG00000162105.17	-1.37183	-0.575937	0.670851	7.95122e-09	2.72358e-07	2.53827e-06	SHANK2
ENSG00000162852.13	6.7164	-0.194634	0.873794	7.26826e-09	2.5128e-07	2.53827e-06	CNST
ENSG00000163959.9	-0.968599	0.599694	1.51539	7.10604e-09	2.46216e-07	2.53827e-06	SLC51A
ENSG00000165629.19	5.77728	0.326289	1.25378	6.42791e-09	2.248e-07	2.53827e-06	ATP5F1C
ENSG00000166165.12	1.4465	-0.65738	0.634029	7.61647e-09	2.62076e-07	2.53827e-06	CKB
ENSG00000174695.9	6.33172	0.311059	1.24062	7.53069e-09	2.59425e-07	2.53827e-06	TMEM167A
ENSG00000180667.10	8.67328	0.729058	1.65756	6.72162e-09	2.34125e-07	2.53827e-06	YOD1
ENSG00000204227.4	4.32421	-0.329141	0.79601	8.21114e-09	2.80278e-07	2.53827e-06	RING1
ENSG00000223547.9	4.88334	-0.406368	0.754521	7.29512e-09	2.52116e-07	2.53827e-06	ZNF844
ENSG00000232125.2	0.241513	-0.720474	0.606898	8.52133e-09	2.89658e-07	2.53827e-06	DYTN
ENSG00000241889.1	-0.344803	-0.724753	0.605101	6.29336e-09	2.20503e-07	2.53827e-06	CTDNEP1P1
ENSG00000251215.1	4.38126	0.343276	1.26863	7.69503e-09	2.64497e-07	2.53827e-06	GOLGA5P1
ENSG00000251230.5	1.67817	0.746613	1.67785	8.0978e-09	2.76831e-07	2.53827e-06	MIR3945HG
ENSG00000260923.6	0.670984	0.75831	1.69151	7.12794e-09	2.46901e-07	2.53827e-06	LINC02193
ENSG00000277246.1	0.812453	0.454404	1.37022	8.54655e-09	2.90417e-07	2.53827e-06
ENSG00000171824.13	5.8077	-0.184966	0.87967	8.77872e-09	2.97416e-07	2.68298e-06	EXOSC10
ENSG00000283384.1	0.346638	0.769721	1.70494	8.62154e-09	2.92671e-07	2.68298e-06
ENSG00000001497.16	4.48088	-0.279135	0.824085	1.27465e-08	4.16878e-07	3.75124e-06	LAS1L
ENSG00000026103.21	6.49418	0.356807	1.28059	1.14629e-08	3.79142e-07	3.75124e-06	FAS
ENSG00000049759.17	3.82369	0.527174	1.4411	9.81142e-09	3.29313e-07	3.75124e-06	NEDD4L
ENSG00000067369.13	6.08963	-0.207318	0.866146	1.3314e-08	4.33294e-07	3.75124e-06	TP53BP1
ENSG00000067606.16	4.11832	-0.360746	0.778762	1.11471e-08	3.69725e-07	3.75124e-06	PRKCZ
ENSG00000072274.12	6.9719	0.428142	1.3455	1.12047e-08	3.71448e-07	3.75124e-06	TFRC
ENSG00000078618.21	8.01836	0.249775	1.18902	9.80467e-09	3.29106e-07	3.75124e-06	NRDC
ENSG00000100433.15	-0.286153	-0.643809	0.640021	1.16816e-08	3.85632e-07	3.75124e-06	KCNK10
ENSG00000102316.16	5.87512	-0.275859	0.825958	9.63848e-09	3.2401e-07	3.75124e-06	MAGED2
ENSG00000102934.9	0.0648119	-0.690555	0.619616	1.21042e-08	3.981e-07	3.75124e-06	PLLP
ENSG00000103642.11	5.04508	0.29687	1.22848	8.79429e-09	2.97885e-07	3.75124e-06	LACTB
ENSG00000104164.10	6.11637	0.259115	1.19674	1.36358e-08	4.42533e-07	3.75124e-06	BLOC1S6
ENSG00000107372.12	7.81227	0.239987	1.18098	1.10454e-08	3.66682e-07	3.75124e-06	ZFAND5
ENSG00000107954.10	2.94632	-0.589864	0.664406	1.19998e-08	3.9503e-07	3.75124e-06	NEURL1
ENSG00000108924.13	0.596731	0.573679	1.48831	1.34926e-08	4.38427e-07	3.75124e-06	HLF
ENSG00000109743.10	6.00201	0.414464	1.3328	1.28924e-08	4.21115e-07	3.75124e-06	BST1
ENSG00000111412.5	5.57789	-0.167902	0.890136	1.0028e-08	3.35931e-07	3.75124e-06	SPRING1
ENSG00000111790.13	6.62442	0.331484	1.25831	9.6203e-09	3.23451e-07	3.75124e-06	FGFR1OP2
ENSG00000115594.11	4.96604	0.659723	1.57978	1.32577e-08	4.31674e-07	3.75124e-06	IL1R1
ENSG00000116016.13	2.04773	-0.590023	0.664332	1.3852e-08	4.48708e-07	3.75124e-06	EPAS1
ENSG00000117480.15	2.88466	-0.556951	0.679737	1.3684e-08	4.43912e-07	3.75124e-06	FAAH
ENSG00000118518.15	6.10058	0.226834	1.17026	9.32666e-09	3.14406e-07	3.75124e-06	RNF146
ENSG00000119392.14	5.83727	-0.181241	0.881944	1.34108e-08	4.36079e-07	3.75124e-06	GLE1
ENSG00000123091.4	7.70624	0.638083	1.55626	1.36479e-08	4.4288e-07	3.75124e-06	RNF11
ENSG00000124374.8	3.49709	-0.365059	0.776437	1.2147e-08	3.99359e-07	3.75124e-06	PAIP2B
ENSG00000134602.15	6.25179	-0.236329	0.848903	1.17446e-08	3.87497e-07	3.75124e-06	STK26
ENSG00000135018.13	7.59699	0.20524	1.15288	1.24353e-08	4.07806e-07	3.75124e-06	UBQLN1
ENSG00000136938.8	4.85529	0.430161	1.34738	1.43173e-08	4.61925e-07	3.75124e-06	ANP32B
ENSG00000137486.16	6.32366	-0.353448	0.782711	1.39778e-08	4.52295e-07	3.75124e-06	ARRB1
ENSG00000138061.11	5.58798	0.554254	1.46841	1.00931e-08	3.37916e-07	3.75124e-06	CYP1B1
ENSG00000140265.12	5.29706	-0.17761	0.884166	1.32067e-08	4.30204e-07	3.75124e-06	ZSCAN29
ENSG00000143942.4	0.551633	0.501973	1.41615	1.42393e-08	4.59718e-07	3.75124e-06	CHAC2
ENSG00000144744.16	6.45932	0.252639	1.19138	9.11568e-09	3.07877e-07	3.75124e-06	UBA3
ENSG00000148834.12	5.70626	0.275512	1.21042	1.07941e-08	3.59139e-07	3.75124e-06	GSTO1
ENSG00000152804.10	4.69656	0.312319	1.2417	1.13032e-08	3.74387e-07	3.75124e-06	HHEX
ENSG00000167112.9	4.06168	-0.265411	0.831962	1.28731e-08	4.20556e-07	3.75124e-06	TRUB2
ENSG00000168175.14	5.75043	0.170699	1.1256	8.99503e-09	3.04133e-07	3.75124e-06	MAPK1IP1L
ENSG00000170035.15	4.15684	0.27548	1.2104	1.08672e-08	3.61336e-07	3.75124e-06	UBE2E3
ENSG00000180758.11	2.78694	-0.399831	0.757947	1.34685e-08	4.37736e-07	3.75124e-06	GPR157
ENSG00000182010.10	3.52341	0.609155	1.52537	1.25327e-08	4.10651e-07	3.75124e-06	RTKN2
ENSG00000204010.3	5.63026	0.903241	1.87026	1.23469e-08	4.0522e-07	3.75124e-06	IFIT1B
ENSG00000204406.12	6.69086	0.212599	1.15877	1.26465e-08	4.1397e-07	3.75124e-06	MBD5
ENSG00000227502.2	-1.31622	0.630374	1.54797	1.43113e-08	4.61756e-07	3.75124e-06	MROCKI
ENSG00000247315.3	4.85174	-0.189029	0.877196	1.10014e-08	3.65364e-07	3.75124e-06	ZCCHC3
ENSG00000259330.2	5.58787	-0.305971	0.808898	1.11485e-08	3.69766e-07	3.75124e-06	INAFM2
ENSG00000272168.6	-0.260148	-0.585669	0.66634	1.16365e-08	3.84294e-07	3.75124e-06	CASC15
ENSG00000067596.10	7.02311	-0.231398	0.851809	1.70991e-08	5.38967e-07	3.80653e-06	DHX8
ENSG00000072682.18	1.13344	0.530537	1.44447	1.55727e-08	4.97138e-07	3.80653e-06	P4HA2
ENSG00000075399.13	4.25165	0.505264	1.41938	1.69949e-08	5.36145e-07	3.80653e-06	VPS9D1
ENSG00000103381.11	8.77247	-0.441739	0.736247	1.67612e-08	5.29798e-07	3.80653e-06	CPPED1
ENSG00000104131.12	5.01395	0.258246	1.19602	1.68165e-08	5.31303e-07	3.80653e-06	EIF3J
ENSG00000109099.13	0.115982	-0.758876	0.590957	1.65428e-08	5.23846e-07	3.80653e-06	PMP22
ENSG00000124102.4	4.09435	0.899548	1.86548	1.65793e-08	5.24842e-07	3.80653e-06	PI3
ENSG00000125485.17	4.2942	-0.264498	0.832488	1.66562e-08	5.26939e-07	3.80653e-06	DDX31
ENSG00000135334.8	5.23525	0.240437	1.18135	1.72037e-08	5.41795e-07	3.80653e-06	AKIRIN2
ENSG00000148143.12	-0.325274	0.705499	1.63071	1.70278e-08	5.37036e-07	3.80653e-06	ZNF462
ENSG00000150347.14	6.2612	0.254838	1.1932	1.60154e-08	5.09378e-07	3.80653e-06	ARID5B
ENSG00000154723.12	2.97444	0.38521	1.30605	1.46581e-08	4.71558e-07	3.80653e-06	ATP5PF
ENSG00000157045.8	4.53967	0.383374	1.30439	1.63052e-08	5.17342e-07	3.80653e-06	NTAN1
ENSG00000158526.7	3.83982	-0.2706	0.828975	1.58989e-08	5.06167e-07	3.80653e-06	TSR2
ENSG00000163625.15	8.81157	0.486851	1.40138	1.6354e-08	5.18682e-07	3.80653e-06	WDFY3
ENSG00000164104.11	5.73632	0.438204	1.35492	1.47577e-08	4.74361e-07	3.80653e-06	HMGB2
ENSG00000169439.11	1.22264	-0.741249	0.598221	1.61908e-08	5.14205e-07	3.80653e-06	SDC2
ENSG00000182782.7	4.85418	0.557931	1.47216	1.58284e-08	5.0422e-07	3.80653e-06	HCAR2
ENSG00000198892.6	2.05449	-1.01857	0.493606	1.5284e-08	4.89105e-07	3.80653e-06	SHISA4
ENSG00000218739.9	4.29503	0.204281	1.15211	1.45888e-08	4.69604e-07	3.80653e-06	CEBPZOS
ENSG00000227740.1	0.439387	0.597373	1.51296	1.67663e-08	5.29937e-07	3.80653e-06	LINC02803
ENSG00000235531.9	1.81998	0.672297	1.59361	1.54839e-08	4.94671e-07	3.80653e-06	MSC-AS1
ENSG00000256433.2	1.12031	0.636481	1.55453	1.43497e-08	4.62843e-07	3.80653e-06
ENSG00000257322.5	0.294994	0.591638	1.50696	1.56846e-08	5.00241e-07	3.80653e-06
ENSG00000004487.15	5.71954	-0.201107	0.869883	1.94559e-08	6.04252e-07	5.12807e-06	KDM1A
ENSG00000117450.13	5.92122	0.251637	1.19056	1.87886e-08	5.85897e-07	5.12807e-06	PRDX1
ENSG00000138376.10	4.42787	0.3367	1.26286	1.8971e-08	5.90928e-07	5.12807e-06	BARD1
ENSG00000144130.11	0.295238	0.723628	1.65133	1.87029e-08	5.83528e-07	5.12807e-06	NT5DC4
ENSG00000163219.11	8.84258	-0.279454	0.823903	1.75351e-08	5.51006e-07	5.12807e-06	ARHGAP25
ENSG00000166033.11	-0.421563	0.700066	1.62458	1.91965e-08	5.97134e-07	5.12807e-06	HTRA1
ENSG00000166908.17	4.80505	-0.231893	0.851517	1.77407e-08	5.56767e-07	5.12807e-06	PIP4K2C
ENSG00000181061.13	3.23281	0.393334	1.31343	1.72909e-08	5.44148e-07	5.12807e-06	HIGD1A
ENSG00000187866.8	5.075	0.155258	1.11362	1.86584e-08	5.82297e-07	5.12807e-06	PABIR1
ENSG00000197448.13	7.18134	0.196748	1.14611	1.97154e-08	6.11352e-07	5.12807e-06	GSTK1
ENSG00000198730.7	5.97335	-0.178868	0.883396	1.799e-08	5.6373e-07	5.12807e-06	CTR9
ENSG00000198843.12	6.46811	0.26454	1.20125	1.94794e-08	6.04896e-07	5.12807e-06	SELENOT
ENSG00000212743.2	3.86875	0.575265	1.48995	1.8236e-08	5.70582e-07	5.12807e-06	LINC02656
ENSG00000235621.8	1.61051	-0.752048	0.59376	1.83895e-08	5.74846e-07	5.12807e-06	LINC00494
ENSG00000243650.3	3.2216	0.310971	1.24054	1.83408e-08	5.73492e-07	5.12807e-06	RN7SL834P
ENSG00000121316.10	7.95624	0.435436	1.35232	2.02038e-08	6.2485e-07	5.8336e-06	PLBD1
ENSG00000140259.6	4.68059	-0.2548	0.838103	1.97673e-08	6.1277e-07	5.8336e-06	MFAP1
ENSG00000251034.1	2.036	-0.469368	0.722281	2.00616e-08	6.20919e-07	5.8336e-06
ENSG00000004897.11	6.98814	0.284942	1.21836	2.51617e-08	7.58647e-07	5.95752e-06	CDC27
ENSG00000075239.13	3.56743	0.341357	1.26695	2.45037e-08	7.41276e-07	5.95752e-06	ACAT1
ENSG00000106799.12	7.54287	0.245725	1.18569	2.33701e-08	7.11077e-07	5.95752e-06	TGFBR1
ENSG00000108604.15	6.762	-0.30489	0.809504	2.23793e-08	6.84393e-07	5.95752e-06	SMARCD2
ENSG00000122026.10	7.19286	0.561438	1.47574	2.27066e-08	6.93238e-07	5.95752e-06	RPL21
ENSG00000128918.14	2.72838	0.661864	1.58213	2.39205e-08	7.25783e-07	5.95752e-06	ALDH1A2
ENSG00000128928.8	5.12112	-0.307511	0.808034	2.3643e-08	7.18378e-07	5.95752e-06	IVD
ENSG00000129295.8	3.51909	0.692327	1.61589	2.47348e-08	7.47391e-07	5.95752e-06	DNAAF11
ENSG00000131126.18	-1.66815	-0.433713	0.740354	2.44747e-08	7.4051e-07	5.95752e-06	TEX101
ENSG00000133169.5	-1.24906	0.656863	1.57665	2.0787e-08	6.40936e-07	5.95752e-06	BEX1
ENSG00000135722.8	2.06405	0.420972	1.33883	2.03308e-08	6.28354e-07	5.95752e-06	FBXL8
ENSG00000140379.7	4.34188	0.679659	1.60176	2.35261e-08	7.15253e-07	5.95752e-06	BCL2A1
ENSG00000147689.16	-0.757729	0.999127	1.99879	2.14209e-08	6.58322e-07	5.95752e-06	FAM83A
ENSG00000156650.12	5.87221	-0.169901	0.888903	2.50655e-08	7.56116e-07	5.95752e-06	KAT6B
ENSG00000161929.14	5.26252	-0.335344	0.792595	2.5276e-08	7.61654e-07	5.95752e-06	SCIMP
ENSG00000165775.17	5.21509	0.320679	1.24892	2.35824e-08	7.16761e-07	5.95752e-06	FUNDC2
ENSG00000166797.10	4.41625	0.321801	1.24989	2.41003e-08	7.30571e-07	5.95752e-06	CIAO2A
ENSG00000168887.10	6.1635	-0.150156	0.901153	2.41508e-08	7.31912e-07	5.95752e-06	C2orf68
ENSG00000184983.9	3.79588	0.360565	1.28393	2.52168e-08	7.60097e-07	5.95752e-06	NDUFA6
ENSG00000224020.1	0.788664	-0.642392	0.64065	2.40623e-08	7.29559e-07	5.95752e-06	MIR181A2HG
ENSG00000238269.8	-0.0255447	0.799123	1.74004	2.36616e-08	7.18877e-07	5.95752e-06	PAGE2B
ENSG00000239839.6	3.76948	1.61633	3.06595	2.14341e-08	6.58683e-07	5.95752e-06	DEFA3
ENSG00000251073.1	0.60429	0.612748	1.52917	2.17886e-08	6.68355e-07	5.95752e-06	NUDT19P5
ENSG00000275700.4	5.66374	-0.225773	0.855137	2.27165e-08	6.93505e-07	5.95752e-06	AATF
ENSG00000283064.1	1.17324	0.452583	1.36849	2.45755e-08	7.43178e-07	5.95752e-06	H2BC6-AS1
ENSG00000086288.11	3.44662	0.433628	1.35063	2.71845e-08	8.11632e-07	6.20189e-06	NME8
ENSG00000104756.15	5.03056	0.218055	1.16316	2.63116e-08	7.88883e-07	6.20189e-06	KCTD9
ENSG00000106392.10	6.50708	0.268235	1.20433	2.58477e-08	7.76716e-07	6.20189e-06	C1GALT1
ENSG00000127884.4	4.47156	-0.291077	0.817291	2.65997e-08	7.96412e-07	6.20189e-06	ECHS1
ENSG00000129245.11	4.77508	-0.275757	0.826017	2.65941e-08	7.96267e-07	6.20189e-06	FXR2
ENSG00000186566.12	6.53786	-0.152383	0.899763	2.69409e-08	8.05301e-07	6.20189e-06	GPATCH8
ENSG00000189013.14	-1.04694	-0.639413	0.641974	2.67427e-08	8.00143e-07	6.20189e-06	KIR2DL4
ENSG00000242473.1	-0.656559	-0.687919	0.620748	2.6061e-08	7.82318e-07	6.20189e-06	KIR2DP1
ENSG00000269404.6	2.93064	-0.582555	0.66778	2.58411e-08	7.76543e-07	6.20189e-06	SPIB
ENSG00000280017.1	-1.07864	0.624363	1.54153	2.53176e-08	7.62746e-07	6.20189e-06
ENSG00000003096.14	0.210458	-0.531209	0.691974	3.11616e-08	9.17263e-07	8.40451e-06	KLHL13
ENSG00000044459.14	3.73032	0.385517	1.30633	4.38253e-08	1.23524e-06	8.40451e-06	CNTLN
ENSG00000084090.13	7.01272	-0.160776	0.894544	4.38987e-08	1.23701e-06	8.40451e-06	STARD7
ENSG00000092068.19	-0.485594	-0.73342	0.601476	2.73143e-08	8.14995e-07	8.40451e-06	SLC7A8
ENSG00000100129.17	7.06724	-0.21353	0.862424	3.75152e-08	1.08025e-06	8.40451e-06	EIF3L
ENSG00000101365.20	5.35312	-0.245951	0.84326	4.07109e-08	1.15957e-06	8.40451e-06	IDH3B
ENSG00000102221.13	1.7722	-0.499558	0.707324	4.73194e-08	1.31828e-06	8.40451e-06	JADE3
ENSG00000104880.17	3.0279	-0.384349	0.766125	3.08955e-08	9.10279e-07	8.40451e-06	ARHGEF18
ENSG00000106701.11	3.19467	0.377482	1.29907	2.80962e-08	8.36005e-07	8.40451e-06	FSD1L
ENSG00000108829.9	5.81625	-0.207695	0.86592	4.53504e-08	1.27172e-06	8.40451e-06	LRRC59
ENSG00000110852.4	5.48318	0.509389	1.42345	4.71805e-08	1.31501e-06	8.40451e-06	CLEC2B
ENSG00000118515.11	7.0034	-0.355565	0.781563	4.47503e-08	1.25741e-06	8.40451e-06	SGK1
ENSG00000121858.10	7.93607	0.401226	1.32063	3.16722e-08	9.30629e-07	8.40451e-06	TNFSF10
ENSG00000123444.13	4.85318	-0.187664	0.878026	4.30263e-08	1.21598e-06	8.40451e-06	KBTBD4
ENSG00000124177.14	7.27741	-0.194428	0.873919	3.00337e-08	8.87568e-07	8.40451e-06	CHD6
ENSG00000125538.11	5.66158	0.477552	1.39238	3.96008e-08	1.13221e-06	8.40451e-06	IL1B
ENSG00000136504.11	7.14105	-0.173518	0.886678	4.04669e-08	1.15357e-06	8.40451e-06	KAT7
ENSG00000137672.12	1.21474	-0.752735	0.593477	3.60282e-08	1.04274e-06	8.40451e-06	TRPC6
ENSG00000139641.12	7.21574	-0.33788	0.791203	4.47129e-08	1.25652e-06	8.40451e-06	ESYT1
ENSG00000141034.9	4.71792	0.465304	1.38061	3.92646e-08	1.12388e-06	8.40451e-06	GID4
ENSG00000141622.13	2.27063	-0.672221	0.62754	4.21155e-08	1.19389e-06	8.40451e-06	ARK2C
ENSG00000143753.12	6.03943	0.196944	1.14627	3.71626e-08	1.07139e-06	8.40451e-06	DEGS1
ENSG00000144028.14	7.9101	-0.22707	0.854368	3.11291e-08	9.1641e-07	8.40451e-06	SNRNP200
ENSG00000144320.13	5.7984	0.297406	1.22893	4.47955e-08	1.25849e-06	8.40451e-06	LNPK
ENSG00000146425.10	6.0113	0.2643	1.20105	3.14065e-08	9.23679e-07	8.40451e-06	DYNLT1
ENSG00000152439.12	3.47542	-0.298482	0.813108	3.21876e-08	9.44072e-07	8.40451e-06	ZNF773
ENSG00000157625.15	6.08612	0.179122	1.13219	4.26256e-08	1.20628e-06	8.40451e-06	TAB3
ENSG00000161681.15	-1.48675	-0.507162	0.703605	3.5721e-08	1.03494e-06	8.40451e-06	SHANK1
ENSG00000163605.14	6.33498	0.33333	1.25992	4.41533e-08	1.24312e-06	8.40451e-06	PPP4R2
ENSG00000164136.16	4.49604	0.327966	1.25524	3.28314e-08	9.60796e-07	8.40451e-06	IL15
ENSG00000164265.8	-1.31102	-0.653509	0.635732	4.03038e-08	1.14956e-06	8.40451e-06	SCGB3A2
ENSG00000165457.13	1.27187	-0.577242	0.670244	4.59948e-08	1.28703e-06	8.40451e-06	FOLR2
ENSG00000165863.16	-1.49925	-0.561929	0.677396	2.96175e-08	8.76552e-07	8.40451e-06	SPMIP5
ENSG00000166710.17	12.0528	0.351268	1.27568	3.8689e-08	1.10958e-06	8.40451e-06	B2M
ENSG00000166734.18	6.62986	0.229851	1.17271	3.78345e-08	1.08825e-06	8.40451e-06	GOLM2
ENSG00000167634.12	-0.948343	-0.596168	0.661509	3.21498e-08	9.43087e-07	8.40451e-06	NLRP7
ENSG00000169583.12	0.700772	-0.6723	0.627506	4.45133e-08	1.25174e-06	8.40451e-06	CLIC3
ENSG00000169919.16	4.94986	-0.242526	0.845264	4.05763e-08	1.15626e-06	8.40451e-06	GUSB
ENSG00000170298.15	-0.907395	-0.667825	0.629455	3.5038e-08	1.01755e-06	8.40451e-06	LGALS9B
ENSG00000170312.15	0.295566	0.587651	1.5028	3.91385e-08	1.12076e-06	8.40451e-06	CDK1
ENSG00000172046.18	6.70654	-0.363795	0.777118	3.27739e-08	9.59304e-07	8.40451e-06	USP19
ENSG00000174130.12	7.77991	0.398409	1.31805	2.84424e-08	8.45271e-07	8.40451e-06	TLR6
ENSG00000175324.9	3.66935	0.30799	1.23798	4.50789e-08	1.26525e-06	8.40451e-06	LSM1
ENSG00000179841.8	2.26537	-0.629722	0.646301	4.66492e-08	1.3025e-06	8.40451e-06	AKAP5
ENSG00000182899.14	7.21212	0.46692	1.38216	3.54654e-08	1.02845e-06	8.40451e-06	RPL35A
ENSG00000183530.13	7.70226	-0.134812	0.910789	3.3788e-08	9.85508e-07	8.40451e-06	PRR14L
ENSG00000184677.16	6.79665	-0.223577	0.856439	3.50538e-08	1.01796e-06	8.40451e-06	ZBTB40
ENSG00000186049.8	2.23256	-1.19368	0.437186	3.28608e-08	9.61558e-07	8.40451e-06	KRT73
ENSG00000188186.10	6.19788	-0.395094	0.76044	3.32456e-08	9.71515e-07	8.40451e-06	LAMTOR4
ENSG00000189043.9	4.83202	0.40235	1.32166	4.4301e-08	1.24666e-06	8.40451e-06	NDUFA4
ENSG00000196230.12	7.21049	-0.21889	0.859226	3.65408e-08	1.05571e-06	8.40451e-06	TUBB
ENSG00000198218.10	6.426	-0.170831	0.888331	4.64751e-08	1.29839e-06	8.40451e-06	QRICH1
ENSG00000204287.13	8.73874	-0.325214	0.79818	4.7041e-08	1.31173e-06	8.40451e-06	HLA-DRA
ENSG00000204381.11	-0.816399	-0.57654	0.67057	3.59925e-08	1.04184e-06	8.40451e-06	LAYN
ENSG00000205784.2	2.85086	-0.391171	0.76251	4.30636e-08	1.21688e-06	8.40451e-06	ARRDC5
ENSG00000224789.1	0.257954	0.689203	1.61239	2.94343e-08	8.71693e-07	8.40451e-06
ENSG00000225447.1	1.89626	0.454066	1.3699	3.38521e-08	9.87158e-07	8.40451e-06	RPS15AP10
ENSG00000232450.1	1.63199	0.451479	1.36744	3.85416e-08	1.10591e-06	8.40451e-06
ENSG00000234518.2	1.00338	0.498678	1.41292	3.23011e-08	9.47025e-07	8.40451e-06	PTGES3P1
ENSG00000236438.7	4.67578	0.697691	1.62191	3.68357e-08	1.06316e-06	8.40451e-06	FAM157A
ENSG00000238241.1	-0.362956	-0.80628	0.571854	4.17854e-08	1.18586e-06	8.40451e-06	CCR12P
ENSG00000241666.2	1.64738	-0.408593	0.753358	3.94946e-08	1.12958e-06	8.40451e-06
ENSG00000241886.1	2.58431	0.558583	1.47282	2.77431e-08	8.26534e-07	8.40451e-06
ENSG00000242661.1	-0.841452	0.639763	1.55807	3.18257e-08	9.34637e-07	8.40451e-06	RPS3AP43
ENSG00000249937.5	-1.59573	-0.482366	0.715803	3.88722e-08	1.11414e-06	8.40451e-06	LINC02223
ENSG00000250138.4	1.01495	1.0072	2.01	3.15336e-08	9.27004e-07	8.40451e-06
ENSG00000258473.1	-1.2634	-0.593007	0.66296	3.32856e-08	9.7255e-07	8.40451e-06
ENSG00000260947.1	-0.116785	-0.834851	0.560641	4.00757e-08	1.14394e-06	8.40451e-06
ENSG00000263874.2	2.67894	0.326173	1.25368	3.53277e-08	1.02494e-06	8.40451e-06	LASP1NB
ENSG00000272325.1	6.6164	-0.185419	0.879394	3.6447e-08	1.05334e-06	8.40451e-06	NUDT3
ENSG00000276058.1	1.66242	0.426778	1.34423	4.70581e-08	1.31213e-06	8.40451e-06	STMN1P1
ENSG00000276293.4	6.23315	-0.210907	0.863994	3.7721e-08	1.08541e-06	8.40451e-06	PIP4K2B
ENSG00000087157.18	7.27969	0.40084	1.32028	4.97633e-08	1.37527e-06	8.44258e-06	PGS1
ENSG00000102580.14	7.03453	0.290173	1.22279	4.93987e-08	1.36683e-06	8.44258e-06	DNAJC3
ENSG00000143158.10	4.98374	0.275089	1.21007	4.77696e-08	1.32884e-06	8.44258e-06	MPC2
ENSG00000149636.15	3.41113	-0.202777	0.868877	4.82883e-08	1.34098e-06	8.44258e-06	DSN1
ENSG00000166881.9	5.1592	-0.199998	0.870552	4.92148e-08	1.36256e-06	8.44258e-06	NEMP1
ENSG00000197497.10	2.0582	-0.429561	0.742488	4.73372e-08	1.31869e-06	8.44258e-06	ZNF665
ENSG00000197880.8	1.20819	-0.615562	0.652676	4.84582e-08	1.34495e-06	8.44258e-06	MDS2
ENSG00000229117.8	7.05826	0.539336	1.4533	4.88587e-08	1.35428e-06	8.44258e-06	RPL41
ENSG00000276900.1	4.02586	0.446815	1.36303	4.81951e-08	1.3388e-06	8.44258e-06
ENSG00000071082.10	6.26385	0.675774	1.59745	5.13393e-08	1.41165e-06	8.56892e-06	RPL31
ENSG00000079335.18	6.4257	0.226915	1.17033	5.23213e-08	1.43413e-06	8.56892e-06	CDC14A
ENSG00000100373.9	0.486791	-0.659041	0.633299	5.05779e-08	1.39412e-06	8.56892e-06	UPK3A
ENSG00000100380.13	5.87946	0.377811	1.29937	5.26009e-08	1.44051e-06	8.56892e-06	ST13
ENSG00000101608.12	8.10945	0.185208	1.13698	5.3463e-08	1.46009e-06	8.56892e-06	MYL12A
ENSG00000135960.9	2.11747	-0.741476	0.598127	5.24329e-08	1.43668e-06	8.56892e-06	EDAR
ENSG00000147889.17	1.64951	0.399948	1.31946	5.21512e-08	1.43025e-06	8.56892e-06	CDKN2A
ENSG00000167680.15	-0.497206	0.710964	1.6369	5.29409e-08	1.44824e-06	8.56892e-06	SEMA6B
ENSG00000197956.9	7.18346	0.272517	1.20791	5.02007e-08	1.3854e-06	8.56892e-06	S100A6
ENSG00000223609.7	-1.56188	0.722132	1.64962	5.33145e-08	1.45673e-06	8.56892e-06	HBD
ENSG00000258634.3	3.66562	-0.278165	0.824639	5.14118e-08	1.41331e-06	8.56892e-06
ENSG00000260035.1	-1.48962	0.566235	1.48065	5.21572e-08	1.43038e-06	8.56892e-06
ENSG00000268157.1	-1.88736	-0.307243	0.808185	4.97834e-08	1.37574e-06	8.56892e-06
ENSG00000275395.4	3.01398	-0.730621	0.602645	5.22664e-08	1.43288e-06	8.56892e-06	FCGBP
ENSG00000064652.10	2.61928	0.275002	1.21	5.56503e-08	1.51204e-06	1.1977e-05	SNX24
ENSG00000075415.12	7.24112	-0.114881	0.923458	5.85583e-08	1.58062e-06	1.1977e-05	SLC25A3
ENSG00000092036.18	4.51779	0.414076	1.33244	5.65595e-08	1.53358e-06	1.1977e-05	HAUS4
ENSG00000099194.5	2.04082	0.453855	1.36969	6.03823e-08	1.62318e-06	1.1977e-05	SCD
ENSG00000100151.15	3.52091	-0.354371	0.782211	5.96749e-08	1.60672e-06	1.1977e-05	PICK1
ENSG00000109083.13	3.6851	0.235031	1.17693	5.98062e-08	1.60978e-06	1.1977e-05	IFT20
ENSG00000111490.12	2.83624	-0.429952	0.742286	6.19792e-08	1.66016e-06	1.1977e-05	TBC1D30
ENSG00000132205.10	6.57281	0.344198	1.26945	5.80408e-08	1.56848e-06	1.1977e-05	EMILIN2
ENSG00000153006.15	4.96907	0.246931	1.18668	6.13249e-08	1.64504e-06	1.1977e-05	SREK1IP1
ENSG00000160049.11	5.15052	-0.188171	0.877718	5.45391e-08	1.48559e-06	1.1977e-05	DFFA
ENSG00000160714.9	5.88178	-0.179944	0.882737	5.75049e-08	1.55588e-06	1.1977e-05	UBE2Q1
ENSG00000168517.10	1.62113	-0.467482	0.723226	6.16775e-08	1.65319e-06	1.1977e-05	HEXIM2
ENSG00000168916.15	2.18855	0.647268	1.5662	6.16982e-08	1.65367e-06	1.1977e-05	ZNF608
ENSG00000168939.11	3.42733	0.350505	1.27501	5.80628e-08	1.569e-06	1.1977e-05	SPRY3
ENSG00000171488.14	6.73039	0.221743	1.16614	5.80797e-08	1.5694e-06	1.1977e-05	LRRC8C
ENSG00000178229.7	3.99941	-0.234192	0.850161	6.16369e-08	1.65226e-06	1.1977e-05	ZNF543
ENSG00000182149.20	7.74155	-0.155087	0.898078	5.36457e-08	1.46423e-06	1.1977e-05	IST1
ENSG00000188158.14	3.94525	-0.485143	0.714426	6.11647e-08	1.64133e-06	1.1977e-05	NHS
ENSG00000224067.2	0.505723	0.697918	1.62216	5.67134e-08	1.53721e-06	1.1977e-05
ENSG00000240047.2	0.390235	0.69157	1.61504	5.50086e-08	1.49678e-06	1.1977e-05	RPS3AP32
ENSG00000278238.1	-0.63992	0.608885	1.52508	6.12733e-08	1.64385e-06	1.1977e-05	CKAP2-DT
ENSG00000091164.12	4.87617	0.196533	1.14594	6.4624e-08	1.72305e-06	1.56212e-05	TXNL1
ENSG00000107736.19	6.47821	-0.408509	0.753402	6.32759e-08	1.691e-06	1.56212e-05	CDH23
ENSG00000123728.9	5.25417	0.288326	1.22122	6.64961e-08	1.76732e-06	1.56212e-05	RAP2C
ENSG00000154027.18	3.58178	-0.658148	0.633691	6.21288e-08	1.66361e-06	1.56212e-05	AK5
ENSG00000160695.14	5.64637	-0.213844	0.862237	6.71163e-08	1.78192e-06	1.56212e-05	VPS11
ENSG00000169224.12	1.2282	-0.822056	0.565635	6.70678e-08	1.78079e-06	1.56212e-05	GCSAML
ENSG00000171863.12	6.56038	0.569465	1.48397	6.55969e-08	1.7461e-06	1.56212e-05	RPS7
ENSG00000172977.12	5.45702	-0.25532	0.837802	6.28095e-08	1.67988e-06	1.56212e-05	KAT5
ENSG00000230387.2	-1.75126	-0.451425	0.73132	6.5733e-08	1.74931e-06	1.56212e-05
ENSG00000259326.1	1.69623	-0.396751	0.759567	6.5898e-08	1.75321e-06	1.56212e-05
ENSG00000060688.12	5.40866	-0.168908	0.889516	7.45587e-08	1.95691e-06	1.7108e-05	SNRNP40
ENSG00000085832.16	7.66259	0.13817	1.10051	7.05833e-08	1.86393e-06	1.7108e-05	EPS15
ENSG00000089220.4	5.30405	-0.319077	0.801583	7.11285e-08	1.87675e-06	1.7108e-05	PEBP1
ENSG00000100483.13	4.8636	0.270448	1.20618	7.09588e-08	1.87276e-06	1.7108e-05	VCPKMT
ENSG00000100485.11	7.40245	0.308904	1.23877	6.71579e-08	1.7829e-06	1.7108e-05	SOS2
ENSG00000103365.15	6.88921	-0.2361	0.849037	6.85898e-08	1.81688e-06	1.7108e-05	GGA2
ENSG00000106018.13	0.0685345	-0.642454	0.640622	7.18752e-08	1.89427e-06	1.7108e-05	VIPR2
ENSG00000106609.16	6.80656	-0.143593	0.905262	7.29485e-08	1.91938e-06	1.7108e-05	TMEM248
ENSG00000131845.14	4.38528	-0.243523	0.84468	7.15047e-08	1.88558e-06	1.7108e-05	ZNF304
ENSG00000132386.10	1.6941	-0.545463	0.685171	7.38916e-08	1.94138e-06	1.7108e-05	SERPINF1
ENSG00000145741.15	7.08673	0.343093	1.26847	7.50393e-08	1.96807e-06	1.7108e-05	BTF3
ENSG00000168002.11	5.36008	-0.156332	0.897303	7.02309e-08	1.85564e-06	1.7108e-05	POLR2G
ENSG00000198879.11	6.09404	-0.209992	0.864542	7.44462e-08	1.95429e-06	1.7108e-05	SFMBT2
ENSG00000226321.5	-0.327061	-0.635068	0.643911	7.25848e-08	1.91088e-06	1.7108e-05	CROCC2
ENSG00000076770.14	9.54328	0.656691	1.57646	8.03392e-08	2.0905e-06	1.75688e-05	MBNL3
ENSG00000101928.12	3.66007	0.39734	1.31708	8.08631e-08	2.1025e-06	1.75688e-05	MOSPD1
ENSG00000119048.7	6.27877	0.341328	1.26692	7.54197e-08	1.97689e-06	1.75688e-05	UBE2B
ENSG00000158623.14	3.94673	-0.244762	0.843955	7.85861e-08	2.0502e-06	1.75688e-05	COPG2
ENSG00000160746.12	4.44941	0.25095	1.18999	8.11186e-08	2.10834e-06	1.75688e-05	ANO10
ENSG00000163597.14	5.55616	-0.188251	0.877669	8.25091e-08	2.14008e-06	1.75688e-05	SNHG16
ENSG00000174282.11	5.64065	-0.259881	0.835157	7.68555e-08	2.01022e-06	1.75688e-05	ZBTB4
ENSG00000185818.7	-1.17424	-0.549855	0.683089	7.96035e-08	2.07361e-06	1.75688e-05	NAT8L
ENSG00000187735.13	5.47851	0.250284	1.18944	8.14977e-08	2.11701e-06	1.75688e-05	TCEA1
ENSG00000198932.12	5.39443	-0.382389	0.767166	8.2329e-08	2.13598e-06	1.75688e-05	GPRASP1
ENSG00000234232.7	-1.63642	0.453997	1.36983	7.96948e-08	2.07571e-06	1.75688e-05	PDE4DIPP7
ENSG00000248385.7	-1.12721	0.654032	1.57356	7.96998e-08	2.07583e-06	1.75688e-05	TARM1
ENSG00000258565.1	2.42646	0.442268	1.35874	7.67984e-08	2.0089e-06	1.75688e-05	BLZF2P
ENSG00000007944.14	6.63863	-0.272259	0.828022	1.02769e-07	2.59937e-06	2.06804e-05	MYLIP
ENSG00000015676.17	6.67254	-0.205768	0.867077	9.79309e-08	2.49174e-06	2.06804e-05	NUDCD3
ENSG00000019995.6	6.76379	0.292877	1.22508	1.02178e-07	2.58629e-06	2.06804e-05	ZRANB1
ENSG00000065526.10	7.85969	-0.159689	0.895218	9.90534e-08	2.51683e-06	2.06804e-05	SPEN
ENSG00000065923.9	5.21559	-0.390389	0.762924	9.2844e-08	2.37719e-06	2.06804e-05	SLC9A7
ENSG00000066032.18	-1.54757	-0.535027	0.690146	9.80466e-08	2.49433e-06	2.06804e-05	CTNNA2
ENSG00000096968.13	7.70862	0.322231	1.25026	8.7873e-08	2.26385e-06	2.06804e-05	JAK2
ENSG00000100320.22	0.524912	-0.537919	0.688763	9.23507e-08	2.36601e-06	2.06804e-05	RBFOX2
ENSG00000108592.16	5.14801	-0.24636	0.843021	8.95057e-08	2.30123e-06	2.06804e-05	FTSJ3
ENSG00000111057.10	0.893784	-0.541968	0.686833	9.3664e-08	2.39575e-06	2.06804e-05	KRT18
ENSG00000113742.12	7.53609	0.312356	1.24173	9.39748e-08	2.40278e-06	2.06804e-05	CPEB4
ENSG00000114698.14	0.718968	0.682967	1.60544	1.02748e-07	2.5989e-06	2.06804e-05	PLSCR4
ENSG00000121406.8	4.70656	-0.239774	0.846878	8.51422e-08	2.20098e-06	2.06804e-05	ZNF549
ENSG00000127955.15	0.211382	-0.532775	0.691224	9.82928e-08	2.49984e-06	2.06804e-05	GNAI1
ENSG00000132518.6	-1.0084	-0.585801	0.666279	8.76712e-08	2.25922e-06	2.06804e-05	GUCY2D
ENSG00000141562.17	5.97794	0.334531	1.26097	9.80797e-08	2.49507e-06	2.06804e-05	NARF
ENSG00000154262.12	1.4477	-0.719991	0.607101	9.00754e-08	2.31424e-06	2.06804e-05	ABCA6
ENSG00000158411.11	4.82262	0.202869	1.15098	8.90288e-08	2.29033e-06	2.06804e-05	MITD1
ENSG00000163378.13	3.51178	0.220748	1.16534	1.01588e-07	2.57322e-06	2.06804e-05	EOGT
ENSG00000164070.11	-0.986124	0.590668	1.50594	8.79899e-08	2.26653e-06	2.06804e-05	HSPA4L
ENSG00000164211.12	4.46408	0.375859	1.29761	9.91697e-08	2.51943e-06	2.06804e-05	STARD4
ENSG00000166200.14	5.23179	0.387098	1.30776	9.63267e-08	2.45577e-06	2.06804e-05	COPS2
ENSG00000170340.10	5.19613	0.253461	1.19206	9.71281e-08	2.47376e-06	2.06804e-05	B3GNT2
ENSG00000177409.11	7.95478	0.487275	1.40179	9.56951e-08	2.44157e-06	2.06804e-05	SAMD9L
ENSG00000183023.18	7.25361	0.407747	1.32661	8.75783e-08	2.25708e-06	2.06804e-05	SLC8A1
ENSG00000185361.8	3.81834	-0.311404	0.805857	8.27728e-08	2.14609e-06	2.06804e-05	TNFAIP8L1
ENSG00000221823.10	6.98823	0.430204	1.34742	8.76888e-08	2.25962e-06	2.06804e-05	PPP3R1
ENSG00000227811.2	0.958438	-0.563241	0.67678	9.07371e-08	2.32932e-06	2.06804e-05	INKA2-AS1
ENSG00000250305.8	-0.586564	0.613546	1.53002	1.03079e-07	2.60623e-06	2.06804e-05	TRMT9B
ENSG00000277481.1	1.04605	0.829737	1.77736	1.00714e-07	2.5538e-06	2.06804e-05	PKD1L3
ENSG00000279913.1	2.42609	0.384065	1.30501	8.67133e-08	2.2372e-06	2.06804e-05
ENSG00000007341.18	3.84107	0.180556	1.13332	1.44678e-07	3.50265e-06	2.37414e-05	ST7L
ENSG00000013503.9	4.08457	-0.189456	0.876936	1.63816e-07	3.89006e-06	2.37414e-05	POLR3B
ENSG00000024526.16	-0.484224	0.609789	1.52604	1.59951e-07	3.81303e-06	2.37414e-05	DEPDC1
ENSG00000025772.7	3.39098	-0.305055	0.809411	1.60934e-07	3.83268e-06	2.37414e-05	TOMM34
ENSG00000035499.12	0.546275	0.502244	1.41641	1.18415e-07	2.94571e-06	2.37414e-05	DEPDC1B
ENSG00000054983.16	6.08565	0.191454	1.14191	1.32632e-07	3.25095e-06	2.37414e-05	GALC
ENSG00000088325.15	1.79739	0.508332	1.4224	1.38065e-07	3.36524e-06	2.37414e-05	TPX2
ENSG00000095397.13	1.13969	-0.655956	0.634655	1.29727e-07	3.18931e-06	2.37414e-05	WHRN
ENSG00000100505.13	1.67528	0.633139	1.55094	1.68638e-07	3.98534e-06	2.37414e-05	TRIM9
ENSG00000104320.13	6.80498	0.307354	1.23744	1.57129e-07	3.7564e-06	2.37414e-05	NBN
ENSG00000104497.13	3.52204	0.402644	1.32193	1.34802e-07	3.29676e-06	2.37414e-05	SNX16
ENSG00000107282.7	0.715317	-0.537582	0.688924	1.13425e-07	2.83641e-06	2.37414e-05	APBA1
ENSG00000109332.19	9.112	0.208676	1.15563	1.51338e-07	3.63918e-06	2.37414e-05	UBE2D3
ENSG00000110077.14	7.64664	0.330658	1.25759	1.27919e-07	3.15076e-06	2.37414e-05	MS4A6A
ENSG00000110799.13	1.78637	-0.718871	0.607573	1.36833e-07	3.33944e-06	2.37414e-05	VWF
ENSG00000113811.10	5.43858	0.466423	1.38168	1.51814e-07	3.64886e-06	2.37414e-05	SELENOK
ENSG00000114988.11	3.80737	-0.180767	0.882234	1.63211e-07	3.87805e-06	2.37414e-05	LMAN2L
ENSG00000115204.14	4.97187	-0.177295	0.88436	1.49107e-07	3.59365e-06	2.37414e-05	MPV17
ENSG00000115339.13	5.22663	0.292054	1.22438	1.51007e-07	3.63242e-06	2.37414e-05	GALNT3
ENSG00000119523.9	4.73985	-0.163086	0.893113	1.39845e-07	3.40241e-06	2.37414e-05	ALG2
ENSG00000120451.10	7.22544	-0.187009	0.878425	1.25078e-07	3.0899e-06	2.37414e-05	SNX19
ENSG00000124224.16	5.17993	0.346515	1.27149	1.63329e-07	3.88038e-06	2.37414e-05	PPP4R1L
ENSG00000126787.12	1.03072	0.637549	1.55568	1.07519e-07	2.70555e-06	2.37414e-05	DLGAP5
ENSG00000127831.10	1.74452	-0.741389	0.598163	1.50524e-07	3.62259e-06	2.37414e-05	VIL1
ENSG00000131174.4	3.80705	0.456196	1.37192	1.16064e-07	2.89437e-06	2.37414e-05	COX7B
ENSG00000133401.15	0.399479	-0.569907	0.67366	1.39827e-07	3.40203e-06	2.37414e-05	PDZD2
ENSG00000134072.10	4.71276	-0.417869	0.74853	1.50709e-07	3.62636e-06	2.37414e-05	CAMK1
ENSG00000135636.13	7.58146	0.667757	1.5886	1.44877e-07	3.50675e-06	2.37414e-05	DYSF
ENSG00000137210.13	4.33616	0.213255	1.1593	1.43628e-07	3.48095e-06	2.37414e-05	TMEM14B
ENSG00000137815.14	5.45976	-0.168173	0.889969	1.56474e-07	3.7432e-06	2.37414e-05	RTF1
ENSG00000139508.14	5.11724	0.171007	1.12584	1.04399e-07	2.63575e-06	2.37414e-05	SLC46A3
ENSG00000140459.17	-1.58701	-0.48631	0.713848	1.03412e-07	2.61359e-06	2.37414e-05	CYP11A1
ENSG00000142583.17	1.65604	0.572137	1.48672	1.6247e-07	3.86329e-06	2.37414e-05	SLC2A5
ENSG00000142627.12	-1.13138	-0.556282	0.680052	1.16595e-07	2.90599e-06	2.37414e-05	EPHA2
ENSG00000143811.18	4.40812	-0.220473	0.858284	1.21582e-07	3.0145e-06	2.37414e-05	PYCR2
ENSG00000143970.16	6.9873	0.149306	1.10904	1.33617e-07	3.27177e-06	2.37414e-05	ASXL2
ENSG00000146021.14	4.30388	-0.357988	0.780252	1.47586e-07	3.56248e-06	2.37414e-05	KLHL3
ENSG00000153395.9	6.90781	-0.267024	0.831032	1.56241e-07	3.7385e-06	2.37414e-05	LPCAT1
ENSG00000158481.12	3.06157	-0.433509	0.740459	1.64071e-07	3.89513e-06	2.37414e-05	CD1C
ENSG00000159921.14	4.52459	-0.183833	0.880361	1.45658e-07	3.52286e-06	2.37414e-05	GNE
ENSG00000162896.5	-1.4127	-0.654934	0.635105	1.16499e-07	2.90387e-06	2.37414e-05	PIGR
ENSG00000163686.14	3.40672	-0.255343	0.837788	1.3638e-07	3.32994e-06	2.37414e-05	ABHD6
ENSG00000163875.15	5.22228	-0.158971	0.895664	1.25984e-07	3.10934e-06	2.37414e-05	MEAF6
ENSG00000164402.13	2.67682	0.345622	1.2707	1.64718e-07	3.90795e-06	2.37414e-05	SEPTIN8
ENSG00000165140.9	3.54636	-0.390106	0.763073	1.15287e-07	2.87734e-06	2.37414e-05	FBP1
ENSG00000166145.14	3.56565	-0.511863	0.701316	1.14878e-07	2.86836e-06	2.37414e-05	SPINT1
ENSG00000166529.14	2.92312	-0.229852	0.852723	1.20143e-07	2.98329e-06	2.37414e-05	ZSCAN21
ENSG00000167333.12	3.75536	-0.229403	0.852988	1.70549e-07	4.02285e-06	2.37414e-05	TRIM68
ENSG00000167996.15	7.60487	0.403789	1.32298	1.52103e-07	3.65473e-06	2.37414e-05	FTH1
ENSG00000168036.16	8.11705	-0.106857	0.928609	1.32794e-07	3.25437e-06	2.37414e-05	CTNNB1
ENSG00000170442.11	-1.54167	-0.485962	0.714021	1.25528e-07	3.09955e-06	2.37414e-05	KRT86
ENSG00000170486.10	1.85608	-1.11125	0.462894	1.6937e-07	3.99973e-06	2.37414e-05	KRT72
ENSG00000170801.9	-1.25409	0.57865	1.49345	1.61745e-07	3.84885e-06	2.37414e-05	HTRA3
ENSG00000170949.17	6.12175	-0.161207	0.894276	1.45403e-07	3.51761e-06	2.37414e-05	ZNF160
ENSG00000174231.16	7.99833	-0.306836	0.808413	1.39109e-07	3.38706e-06	2.37414e-05	PRPF8
ENSG00000174652.17	6.75108	-0.253152	0.839061	1.10211e-07	2.76539e-06	2.37414e-05	ZNF266
ENSG00000175575.12	3.72913	-0.205532	0.867219	1.44333e-07	3.49553e-06	2.37414e-05	PAAF1
ENSG00000178035.11	5.40377	-0.287254	0.81946	1.46746e-07	3.54523e-06	2.37414e-05	IMPDH2
ENSG00000179918.18	4.65306	0.191471	1.14193	1.30416e-07	3.20396e-06	2.37414e-05	SEPHS2
ENSG00000182957.15	7.44238	0.163443	1.11996	1.47147e-07	3.55347e-06	2.37414e-05	SPATA13
ENSG00000184182.18	4.44541	0.214262	1.16011	1.67005e-07	3.95319e-06	2.37414e-05	UBE2F
ENSG00000184828.9	-1.28535	-0.541871	0.686879	1.22236e-07	3.02863e-06	2.37414e-05	ZBTB7C
ENSG00000186081.11	-1.09549	-0.61064	0.654906	1.70101e-07	4.01408e-06	2.37414e-05	KRT5
ENSG00000186594.14	3.58973	0.261844	1.19901	1.44606e-07	3.50117e-06	2.37414e-05	MIR22HG
ENSG00000187098.14	2.3654	0.355026	1.27901	1.46547e-07	3.54116e-06	2.37414e-05	MITF
ENSG00000196218.12	1.06166	-0.504953	0.704684	1.13998e-07	2.84901e-06	2.37414e-05	RYR1
ENSG00000197140.14	-0.219514	0.574933	1.48961	1.1227e-07	2.81094e-06	2.37414e-05	ADAM32
ENSG00000197506.7	-0.264744	0.678172	1.60011	1.69822e-07	4.00861e-06	2.37414e-05	SLC28A3
ENSG00000197763.14	0.700483	-0.520291	0.697231	1.19767e-07	2.97512e-06	2.37414e-05	TXNRD3
ENSG00000198794.11	-0.191993	-0.614187	0.653298	1.54007e-07	3.69338e-06	2.37414e-05	SCAMP5
ENSG00000198821.10	7.47637	-0.332144	0.794355	1.69909e-07	4.01031e-06	2.37414e-05	CD247
ENSG00000204590.12	5.13611	-0.230523	0.852326	1.3542e-07	3.30976e-06	2.37414e-05	GNL1
ENSG00000214797.3	-0.00276499	-0.614694	0.653068	1.33181e-07	3.26255e-06	2.37414e-05
ENSG00000225783.6	7.76036	0.431618	1.34875	1.37722e-07	3.35806e-06	2.37414e-05	MIAT
ENSG00000226266.6	2.52491	0.290181	1.22279	1.13344e-07	2.83462e-06	2.37414e-05
ENSG00000228382.1	3.2218	-0.358384	0.780038	1.66967e-07	3.95242e-06	2.37414e-05	ITPKB-IT1
ENSG00000228526.6	-0.775386	0.551267	1.46537	1.28201e-07	3.15677e-06	2.37414e-05	MIR34AHG
ENSG00000229106.1	2.31206	-0.57935	0.669265	1.18959e-07	2.95755e-06	2.37414e-05	BTBD6P1
ENSG00000230551.4	6.01516	0.241939	1.18258	1.6751e-07	3.96314e-06	2.37414e-05
ENSG00000232542.1	2.29173	0.349104	1.27377	1.46138e-07	3.53274e-06	2.37414e-05	DPYD-IT1
ENSG00000245888.6	0.88177	0.400949	1.32038	1.36018e-07	3.32233e-06	2.37414e-05	NSMCE1-DT
ENSG00000249042.5	-0.571058	0.543814	1.45782	1.10768e-07	2.77774e-06	2.37414e-05	FAM151B-DT
ENSG00000249173.5	-1.59021	0.585261	1.50031	1.33057e-07	3.25993e-06	2.37414e-05	LINC01093
ENSG00000251379.1	1.50849	0.605013	1.52099	1.57969e-07	3.77328e-06	2.37414e-05
ENSG00000253115.1	-0.757572	0.567831	1.48229	1.33108e-07	3.26101e-06	2.37414e-05
ENSG00000258101.2	1.53724	0.55215	1.46627	1.52751e-07	3.66789e-06	2.37414e-05
ENSG00000261211.1	0.818184	0.685792	1.60859	1.67235e-07	3.95771e-06	2.37414e-05
ENSG00000012963.14	4.54301	-0.158943	0.895681	2.43337e-07	5.46572e-06	3.42724e-05	UBR7
ENSG00000077254.14	7.13957	0.165738	1.12174	2.45162e-07	5.50014e-06	3.42724e-05	USP33
ENSG00000078140.13	5.84433	0.193906	1.14386	1.90061e-07	4.42353e-06	3.42724e-05	UBE2K
ENSG00000099204.18	7.41186	-0.320911	0.800564	2.50214e-07	5.59498e-06	3.42724e-05	ABLIM1
ENSG00000100994.11	5.699	-0.38742	0.764495	2.18292e-07	4.985e-06	3.42724e-05	PYGB
ENSG00000102760.12	5.36921	0.423457	1.34114	2.42764e-07	5.45491e-06	3.42724e-05	RGCC
ENSG00000102781.13	4.2861	0.267575	1.20378	1.70675e-07	4.02532e-06	3.42724e-05	KATNAL1
ENSG00000103485.17	0.543481	-0.501982	0.706136	2.00209e-07	4.62782e-06	3.42724e-05	QPRT
ENSG00000112234.8	6.63817	0.187917	1.13912	2.02097e-07	4.66551e-06	3.42724e-05	FBXL4
ENSG00000112799.8	4.59199	-0.317005	0.802735	2.04388e-07	4.71113e-06	3.42724e-05	LY86
ENSG00000116898.11	3.8783	0.212229	1.15848	2.2034e-07	5.02492e-06	3.42724e-05	MRPS15
ENSG00000120156.20	0.760221	-0.881498	0.542804	2.51871e-07	5.62595e-06	3.42724e-05	TEK
ENSG00000124098.9	8.68954	0.757376	1.69041	2.44274e-07	5.48341e-06	3.42724e-05	FAM210B
ENSG00000125257.13	6.00469	0.477915	1.39273	2.26321e-07	5.14087e-06	3.42724e-05	ABCC4
ENSG00000126351.12	3.58611	-0.374798	0.771213	1.84628e-07	4.31298e-06	3.42724e-05	THRA
ENSG00000127586.16	2.80232	-0.508585	0.702912	2.33616e-07	5.28104e-06	3.42724e-05	CHTF18
ENSG00000130635.15	-0.602827	-0.628303	0.646937	2.39107e-07	5.38566e-06	3.42724e-05	COL5A1
ENSG00000131080.14	0.107905	0.52657	1.4405	2.00384e-07	4.63132e-06	3.42724e-05	EDA2R
ENSG00000131378.13	5.85772	-0.214246	0.861997	2.13773e-07	4.89655e-06	3.42724e-05	RFTN1
ENSG00000133812.15	7.23116	0.294145	1.22616	2.08779e-07	4.79818e-06	3.42724e-05	SBF2
ENSG00000137944.17	4.35883	0.217725	1.1629	1.84946e-07	4.31948e-06	3.42724e-05	KYAT3
ENSG00000138175.8	2.45922	0.263512	1.2004	1.77628e-07	4.16935e-06	3.42724e-05	ARL3
ENSG00000139354.10	1.58577	0.450972	1.36696	1.82801e-07	4.27563e-06	3.42724e-05	GAS2L3
ENSG00000140941.12	6.21196	0.275989	1.21082	1.93015e-07	4.48329e-06	3.42724e-05	MAP1LC3B
ENSG00000143374.16	3.99621	-0.243399	0.844753	2.151e-07	4.92259e-06	3.42724e-05	TARS2
ENSG00000143578.15	2.41951	-0.30356	0.810251	1.82718e-07	4.27394e-06	3.42724e-05	CREB3L4
ENSG00000143776.18	3.92928	0.567914	1.48238	2.514e-07	5.61716e-06	3.42724e-05	CDC42BPA
ENSG00000144021.2	6.37931	-0.0858486	0.94223	2.17141e-07	4.96253e-06	3.42724e-05	CIAO1
ENSG00000144815.15	5.86395	0.172286	1.12684	2.47922e-07	5.55204e-06	3.42724e-05	NXPE3
ENSG00000146834.13	5.09274	-0.297737	0.813527	2.53201e-07	5.65077e-06	3.42724e-05	MEPCE
ENSG00000148296.6	4.96013	-0.204121	0.868067	2.32335e-07	5.25652e-06	3.42724e-05	SURF6
ENSG00000149480.6	6.75966	-0.244904	0.843872	1.96566e-07	4.5548e-06	3.42724e-05	MTA2
ENSG00000152684.10	3.84803	0.266773	1.20311	2.05281e-07	4.72887e-06	3.42724e-05	PELO
ENSG00000154309.8	2.69187	-0.267806	0.830582	2.47529e-07	5.54467e-06	3.42724e-05	DISP1
ENSG00000155008.13	3.11402	0.237027	1.17856	1.84351e-07	4.30732e-06	3.42724e-05	APOOL
ENSG00000155016.17	3.7026	-0.267359	0.830839	1.85516e-07	4.3311e-06	3.42724e-05	CYP2U1
ENSG00000156853.12	4.0747	-0.199441	0.870888	1.89437e-07	4.41087e-06	3.42724e-05	ZNF689
ENSG00000156966.6	0.48065	-0.56999	0.673621	2.4222e-07	5.44463e-06	3.42724e-05	B3GNT7
ENSG00000162894.11	5.38516	-0.371525	0.772965	1.76517e-07	4.14643e-06	3.42724e-05	FCMR
ENSG00000162946.21	5.82415	0.345861	1.27091	2.38418e-07	5.37256e-06	3.42724e-05	DISC1
ENSG00000163558.12	4.55921	0.225561	1.16923	2.28916e-07	5.19088e-06	3.42724e-05	PRKCI
ENSG00000167107.12	3.68954	-0.349365	0.784929	2.05819e-07	4.73956e-06	3.42724e-05	ACSF2
ENSG00000173281.4	7.61841	0.439206	1.35586	2.05623e-07	4.73567e-06	3.42724e-05	PPP1R3B
ENSG00000173988.12	0.224649	0.46004	1.37558	2.14398e-07	4.90882e-06	3.42724e-05	LRRC63
ENSG00000177173.5	3.6817	0.296917	1.22852	2.26143e-07	5.13742e-06	3.42724e-05	NAP1L4P1
ENSG00000177733.6	5.95308	-0.218326	0.859562	2.39397e-07	5.39116e-06	3.42724e-05	HNRNPA0
ENSG00000178695.5	6.93221	0.311138	1.24069	1.90016e-07	4.42261e-06	3.42724e-05	KCTD12
ENSG00000178922.16	2.39409	-0.376145	0.770493	1.73035e-07	4.07437e-06	3.42724e-05	HYI
ENSG00000180644.7	7.14047	-0.557295	0.679575	2.33233e-07	5.2737e-06	3.42724e-05	PRF1
ENSG00000181191.11	3.78539	-0.302701	0.810733	2.1854e-07	4.98984e-06	3.42724e-05	PJA1
ENSG00000183508.4	10.679	0.84227	1.79287	1.8948e-07	4.41175e-06	3.42724e-05	TENT5C
ENSG00000183624.13	5.10769	-0.213843	0.862237	2.21807e-07	5.05345e-06	3.42724e-05	HMCES
ENSG00000183914.14	-1.17183	-0.592282	0.663293	2.45169e-07	5.50028e-06	3.42724e-05	DNAH2
ENSG00000188243.12	2.9363	0.639984	1.55831	2.25649e-07	5.12787e-06	3.42724e-05	COMMD6
ENSG00000189221.9	0.865226	1.09697	2.13905	2.00477e-07	4.63317e-06	3.42724e-05	MAOA
ENSG00000196943.12	5.66619	-0.237717	0.848086	2.26178e-07	5.1381e-06	3.42724e-05	NOP9
ENSG00000198155.5	1.52339	-0.449957	0.732064	2.28222e-07	5.17751e-06	3.42724e-05	ZNF876P
ENSG00000198826.10	2.38882	0.426933	1.34437	1.98729e-07	4.5982e-06	3.42724e-05	ARHGAP11A
ENSG00000198918.7	5.81411	0.608677	1.52486	2.24294e-07	5.10167e-06	3.42724e-05	RPL39
ENSG00000213762.11	5.22624	-0.193781	0.874311	2.5033e-07	5.59715e-06	3.42724e-05	ZNF134
ENSG00000215126.10	2.83578	0.409625	1.32834	2.32027e-07	5.25061e-06	3.42724e-05	ZNG1F
ENSG00000225900.1	0.739684	0.448028	1.36417	1.89884e-07	4.41993e-06	3.42724e-05	HSPE1P13
ENSG00000227953.6	0.896861	-0.522935	0.695954	2.26359e-07	5.1416e-06	3.42724e-05	LINC01341
ENSG00000236548.1	-0.884219	0.528929	1.44286	1.80858e-07	4.23579e-06	3.42724e-05	RNF217-AS1
ENSG00000237036.4	1.79568	0.29624	1.22794	1.86157e-07	4.34417e-06	3.42724e-05	ZEB1-AS1
ENSG00000243317.7	5.72316	0.448151	1.36429	2.00099e-07	4.62561e-06	3.42724e-05	STMP1
ENSG00000245958.6	5.4311	0.241637	1.18233	2.02896e-07	4.68144e-06	3.42724e-05	SEPTIN7P14
ENSG00000253364.2	-0.721064	-0.754162	0.592891	2.02129e-07	4.66616e-06	3.42724e-05	COPDA1
ENSG00000255423.1	3.85889	0.21323	1.15928	1.76821e-07	4.1527e-06	3.42724e-05	EBLN2
ENSG00000260386.6	-0.756533	-0.595199	0.661953	2.25744e-07	5.12972e-06	3.42724e-05	LDC1P
ENSG00000272563.1	-1.32932	0.504697	1.41883	2.44946e-07	5.49609e-06	3.42724e-05
ENSG00000275278.1	-0.0478694	0.608113	1.52426	2.4021e-07	5.40657e-06	3.42724e-05
ENSG00000279361.1	2.52001	-0.333579	0.793565	2.29225e-07	5.19681e-06	3.42724e-05
ENSG00000280381.1	2.06197	-0.578592	0.669617	2.51273e-07	5.61479e-06	3.42724e-05
ENSG00000282508.1	3.15994	0.545991	1.46002	2.11312e-07	4.84815e-06	3.42724e-05	LINC01002
ENSG00000231160.9	2.29328	-0.421008	0.746903	2.53429e-07	5.65501e-06	3.5354e-05	KLF3-AS1
ENSG00000006607.13	5.03225	-0.241214	0.846033	2.95221e-07	6.45259e-06	4.49074e-05	FARP2
ENSG00000009307.15	9.23335	0.236898	1.17846	2.68022e-07	5.93669e-06	4.49074e-05	CSDE1
ENSG00000072401.14	6.14746	0.43049	1.34769	3.02323e-07	6.58504e-06	4.49074e-05	UBE2D1
ENSG00000085563.14	4.40395	-0.397895	0.758965	2.54567e-07	5.67633e-06	4.49074e-05	ABCB1
ENSG00000109065.11	4.38428	-0.283453	0.821622	2.97559e-07	6.49629e-06	4.49074e-05	NAT9
ENSG00000112182.14	5.77576	-0.44586	0.734146	2.7014e-07	5.97735e-06	4.49074e-05	BACH2
ENSG00000112212.11	1.03411	0.8157	1.76015	2.7632e-07	6.09554e-06	4.49074e-05	TSPO2
ENSG00000113391.18	5.55553	0.204058	1.15193	2.96586e-07	6.47811e-06	4.49074e-05	FAM172A
ENSG00000114999.7	5.18965	0.203661	1.15162	2.82153e-07	6.20644e-06	4.49074e-05	TTL
ENSG00000117222.13	5.9195	-0.123914	0.917694	2.76475e-07	6.09849e-06	4.49074e-05	RBBP5
ENSG00000120053.10	3.25642	-0.255226	0.837856	2.80369e-07	6.17258e-06	4.49074e-05	GOT1
ENSG00000130449.5	6.41737	0.22135	1.16582	2.88791e-07	6.33186e-06	4.49074e-05	ZSWIM6
ENSG00000130772.13	4.26557	-0.191863	0.875474	2.67101e-07	5.91898e-06	4.49074e-05	MED18
ENSG00000133256.12	2.2075	-0.3307	0.795151	2.9895e-07	6.52225e-06	4.49074e-05	PDE6B
ENSG00000134419.15	5.82447	0.397495	1.31722	2.85615e-07	6.27194e-06	4.49074e-05	RPS15A
ENSG00000137656.11	4.53084	-0.157121	0.896813	3.0216e-07	6.58201e-06	4.49074e-05	BUD13
ENSG00000138002.14	3.92267	-0.278984	0.824171	2.81298e-07	6.19022e-06	4.49074e-05	IFT172
ENSG00000139304.12	-1.84692	-0.34546	0.787057	2.60796e-07	5.79729e-06	4.49074e-05	PTPRQ
ENSG00000149557.12	1.49132	-0.579589	0.669154	2.70705e-07	5.98819e-06	4.49074e-05	FEZ1
ENSG00000154914.16	-0.243623	-0.563912	0.676465	2.6673e-07	5.91183e-06	4.49074e-05	USP43
ENSG00000167034.9	1.82522	-1.26026	0.41747	2.72479e-07	6.02217e-06	4.49074e-05	NKX3-1
ENSG00000168079.16	-0.928577	-0.611377	0.654572	2.99819e-07	6.53845e-06	4.49074e-05	SCARA5
ENSG00000171204.12	3.78352	0.299329	1.23057	2.92791e-07	6.40705e-06	4.49074e-05	TMEM126B
ENSG00000198400.11	-0.382051	-0.722539	0.60603	3.02609e-07	6.59036e-06	4.49074e-05	NTRK1
ENSG00000198830.10	7.02357	-0.158621	0.895881	2.70807e-07	5.99015e-06	4.49074e-05	HMGN2
ENSG00000204086.4	1.45059	0.329366	1.25646	2.99344e-07	6.5296e-06	4.49074e-05	RPA4
ENSG00000224388.1	0.0718313	-0.643642	0.640095	2.63586e-07	5.85123e-06	4.49074e-05	BACE2-IT1
ENSG00000231304.2	2.23005	0.403226	1.32246	2.7038e-07	5.98195e-06	4.49074e-05	SGO1-AS1
ENSG00000231424.2	-1.6525	-0.548874	0.683553	2.68901e-07	5.95357e-06	4.49074e-05
ENSG00000250562.1	-1.89133	0.329714	1.25676	2.70068e-07	5.97597e-06	4.49074e-05	RPL38P4
ENSG00000251431.1	-1.75049	0.364502	1.28744	2.85229e-07	6.26465e-06	4.49074e-05
ENSG00000259150.5	-1.84245	-0.342993	0.788404	2.78288e-07	6.13303e-06	4.49074e-05	LINC00929
ENSG00000269887.1	0.278672	0.677312	1.59916	3.0214e-07	6.58164e-06	4.49074e-05
ENSG00000271461.1	2.47012	0.515237	1.42923	2.84258e-07	6.2463e-06	4.49074e-05	CKAP2LP1
ENSG00000012822.15	6.99269	-0.268784	0.830019	3.44553e-07	7.36663e-06	4.91662e-05	CALCOCO1
ENSG00000013275.7	5.27737	-0.279342	0.823967	3.54467e-07	7.54605e-06	4.91662e-05	PSMC4
ENSG00000057704.12	6.73806	-0.403905	0.75581	3.14867e-07	6.81997e-06	4.91662e-05	TMCC3
ENSG00000060140.8	1.88917	0.600352	1.51609	3.17173e-07	6.86294e-06	4.91662e-05	STYK1
ENSG00000081019.13	6.29566	0.164348	1.12066	3.14613e-07	6.81524e-06	4.91662e-05	RSBN1
ENSG00000100292.16	4.88916	-0.457477	0.728259	3.57041e-07	7.5924e-06	4.91662e-05	HMOX1
ENSG00000104043.14	6.00896	0.323092	1.25101	3.25546e-07	7.01825e-06	4.91662e-05	ATP8B4
ENSG00000105639.18	7.3899	0.419411	1.33738	3.37277e-07	7.23395e-06	4.91662e-05	JAK3
ENSG00000106070.17	3.69485	0.520756	1.43471	3.69378e-07	7.81304e-06	4.91662e-05	GRB10
ENSG00000114127.10	8.08343	0.218125	1.16322	3.24496e-07	6.99885e-06	4.91662e-05	XRN1
ENSG00000114650.18	5.7773	-0.400049	0.757833	3.181e-07	6.88019e-06	4.91662e-05	SCAP
ENSG00000117036.11	5.93477	-0.115464	0.923085	3.40675e-07	7.29601e-06	4.91662e-05	ETV3
ENSG00000122862.4	9.95173	0.41186	1.3304	3.71672e-07	7.85381e-06	4.91662e-05	SRGN
ENSG00000128266.8	3.97604	-0.64918	0.637643	3.49659e-07	7.45923e-06	4.91662e-05	GNAZ
ENSG00000132185.16	3.92733	-0.691025	0.619414	3.67673e-07	7.7827e-06	4.91662e-05	FCRLA
ENSG00000134215.15	6.77128	0.201156	1.14962	3.41028e-07	7.30245e-06	4.91662e-05	VAV3
ENSG00000136021.18	6.73699	0.185324	1.13707	3.44068e-07	7.3578e-06	4.91662e-05	SCYL2
ENSG00000141499.16	2.95724	-0.282712	0.822044	3.39379e-07	7.27236e-06	4.91662e-05	WRAP53
ENSG00000145362.17	-0.631963	-0.777564	0.583351	3.36772e-07	7.22471e-06	4.91662e-05	ANK2
ENSG00000145491.11	3.69221	0.475253	1.39016	3.58066e-07	7.61081e-06	4.91662e-05	ROPN1L
ENSG00000149262.16	5.65513	-0.123938	0.917679	3.22625e-07	6.96421e-06	4.91662e-05	INTS4
ENSG00000154957.13	5.13031	-0.161172	0.894298	3.66736e-07	7.76598e-06	4.91662e-05	ZNF18
ENSG00000155368.16	4.22637	0.361123	1.28443	3.48125e-07	7.43145e-06	4.91662e-05	DBI
ENSG00000157184.6	4.75567	-0.148859	0.901963	3.61925e-07	7.68003e-06	4.91662e-05	CPT2
ENSG00000166126.10	0.292908	-0.582251	0.667921	3.34587e-07	7.18469e-06	4.91662e-05	AMN
ENSG00000168234.12	6.32243	0.225457	1.16915	3.626e-07	7.6921e-06	4.91662e-05	TTC39C
ENSG00000170485.16	-0.222894	-0.666231	0.630151	3.39567e-07	7.2758e-06	4.91662e-05	NPAS2
ENSG00000172939.8	6.56549	0.177055	1.13057	3.24858e-07	7.00554e-06	4.91662e-05	OXSR1
ENSG00000176624.10	6.53128	-0.230313	0.85245	3.03724e-07	6.61106e-06	4.91662e-05	MEX3C
ENSG00000180730.4	-1.36017	-0.549607	0.683206	3.55876e-07	7.57143e-06	4.91662e-05	SHISA2
ENSG00000182307.12	4.59214	-0.1794	0.88307	3.55782e-07	7.56975e-06	4.91662e-05	C8orf33
ENSG00000183549.10	-1.78379	-0.363407	0.777327	3.19074e-07	6.89831e-06	4.91662e-05	ACSM5
ENSG00000185252.18	3.41738	-0.29491	0.815123	3.63424e-07	7.70685e-06	4.91662e-05	ZNF74
ENSG00000187147.17	5.64728	-0.220362	0.85835	3.50719e-07	7.47841e-06	4.91662e-05	RNF220
ENSG00000196072.11	4.39907	0.339058	1.26493	3.45701e-07	7.38748e-06	4.91662e-05	BLOC1S2
ENSG00000198948.11	5.26696	-0.496595	0.708778	3.70535e-07	7.83361e-06	4.91662e-05	MFAP3L
ENSG00000204524.6	5.12455	-0.137528	0.909076	3.30852e-07	7.1161e-06	4.91662e-05	ZNF805
ENSG00000215244.2	3.74136	0.605399	1.5214	3.14883e-07	6.82026e-06	4.91662e-05	LINC02649
ENSG00000217275.2	0.247866	0.60814	1.52429	3.40458e-07	7.29205e-06	4.91662e-05
ENSG00000231165.3	-1.41039	-0.481274	0.716345	3.28462e-07	7.07208e-06	4.91662e-05	TRBV26OR9-2
ENSG00000242779.6	0.814969	-0.629641	0.646337	3.55002e-07	7.5557e-06	4.91662e-05	ZNF702P
ENSG00000267711.1	-0.592942	0.546652	1.46069	3.3305e-07	7.15648e-06	4.91662e-05
ENSG00000282988.1	2.51734	0.546869	1.46091	3.44688e-07	7.36908e-06	4.91662e-05
ENSG00000034239.10	-1.39199	-0.582911	0.667615	3.7576e-07	7.92964e-06	6.54894e-05	CLXN
ENSG00000205846.3	1.49323	0.591945	1.50728	3.71788e-07	7.85587e-06	6.54894e-05	CLEC6A
ENSG00000064989.12	2.04147	0.466685	1.38193	4.63887e-07	9.52118e-06	6.60226e-05	CALCRL
ENSG00000065534.18	4.33953	-0.576742	0.670476	4.53576e-07	9.33949e-06	6.60226e-05	MYLK
ENSG00000108389.9	6.51782	-0.159738	0.895188	4.74087e-07	9.69978e-06	6.60226e-05	MTMR4
ENSG00000110723.11	2.24206	-0.44144	0.736399	4.39835e-07	9.09553e-06	6.60226e-05	EXPH5
ENSG00000112218.8	0.306984	0.581534	1.49644	4.21515e-07	8.76698e-06	6.60226e-05	GPR63
ENSG00000115828.15	6.59581	0.47966	1.39442	4.1907e-07	8.72285e-06	6.60226e-05	QPCT
ENSG00000118689.14	8.28101	0.515476	1.42947	4.56223e-07	9.38624e-06	6.60226e-05	FOXO3
ENSG00000120137.6	6.94643	0.167093	1.12279	4.12997e-07	8.61294e-06	6.60226e-05	PANK3
ENSG00000127837.9	5.30828	-0.343564	0.788092	4.56459e-07	9.39041e-06	6.60226e-05	AAMP
ENSG00000129493.14	5.11812	-0.23466	0.849885	4.72107e-07	9.66519e-06	6.60226e-05	HEATR5A
ENSG00000131480.8	3.37937	-0.535242	0.690043	3.94033e-07	8.26697e-06	6.60226e-05	AOC2
ENSG00000135480.15	-1.23808	0.513487	1.4275	4.52244e-07	9.31592e-06	6.60226e-05	KRT7
ENSG00000136147.17	6.00809	0.203867	1.15178	4.62762e-07	9.50141e-06	6.60226e-05	PHF11
ENSG00000136603.13	5.65434	0.288411	1.22129	4.16783e-07	8.6815e-06	6.60226e-05	SKIL
ENSG00000137727.12	-0.673648	-0.627324	0.647376	4.66769e-07	9.57176e-06	6.60226e-05	ARHGAP20
ENSG00000138326.18	6.48945	0.56466	1.47904	4.10734e-07	8.57187e-06	6.60226e-05	RPS24
ENSG00000140030.5	6.23746	0.323946	1.25175	4.12952e-07	8.61211e-06	6.60226e-05	GPR65
ENSG00000145569.5	5.9404	0.228263	1.17142	3.91758e-07	8.22518e-06	6.60226e-05	OTULINL
ENSG00000149182.14	6.72455	-0.224387	0.855958	4.75729e-07	9.72841e-06	6.60226e-05	ARFGAP2
ENSG00000149474.13	4.45509	-0.21301	0.862735	3.76005e-07	7.93418e-06	6.60226e-05	KAT14
ENSG00000152061.23	8.3608	-0.18619	0.878924	3.78307e-07	7.97688e-06	6.60226e-05	RABGAP1L
ENSG00000152229.18	5.94871	0.332616	1.2593	4.71049e-07	9.6467e-06	6.60226e-05	PSTPIP2
ENSG00000153214.9	5.46919	0.172014	1.12663	4.4541e-07	9.19476e-06	6.60226e-05	TMEM87B
ENSG00000155463.12	6.35804	-0.136579	0.909674	3.86009e-07	8.11933e-06	6.60226e-05	OXA1L
ENSG00000156675.15	8.79223	-0.364698	0.776632	4.62191e-07	9.49138e-06	6.60226e-05	RAB11FIP1
ENSG00000163577.7	2.92962	0.348435	1.27318	4.08635e-07	8.53372e-06	6.60226e-05	EIF5A2
ENSG00000165671.19	8.24887	-0.150974	0.900642	4.64826e-07	9.53766e-06	6.60226e-05	NSD1
ENSG00000166035.10	1.28209	-0.661512	0.632215	4.21757e-07	8.77134e-06	6.60226e-05	LIPC
ENSG00000167447.12	4.77888	-0.165218	0.891794	3.88817e-07	8.17108e-06	6.60226e-05	SMG8
ENSG00000168883.19	5.48503	-0.118069	0.92142	4.23059e-07	8.79483e-06	6.60226e-05	USP39
ENSG00000171385.9	0.241452	-0.664513	0.630902	4.32735e-07	8.96865e-06	6.60226e-05	KCND3
ENSG00000172007.5	5.13255	0.284472	1.21796	4.71106e-07	9.64769e-06	6.60226e-05	RAB33B
ENSG00000174473.15	-0.776127	-0.752537	0.593559	4.31704e-07	8.95017e-06	6.60226e-05	GALNTL6
ENSG00000174482.10	1.05814	-0.777203	0.583497	4.70252e-07	9.63275e-06	6.60226e-05	LINGO2
ENSG00000178538.9	1.2625	-0.705723	0.613135	4.0461e-07	8.46044e-06	6.60226e-05	CA8
ENSG00000204580.13	1.14646	-0.531559	0.691807	4.1279e-07	8.60917e-06	6.60226e-05	DDR1
ENSG00000229715.4	3.82128	0.357187	1.28093	4.47386e-07	9.22984e-06	6.60226e-05	EEF1DP3
ENSG00000231440.1	-1.53018	0.469667	1.38479	4.37982e-07	9.06246e-06	6.60226e-05
ENSG00000234436.1	0.506804	0.625682	1.54294	4.22505e-07	8.78483e-06	6.60226e-05
ENSG00000235192.1	2.57932	0.385694	1.30649	4.13687e-07	8.62544e-06	6.60226e-05
ENSG00000248697.1	1.01249	0.51144	1.42547	4.55671e-07	9.37649e-06	6.60226e-05	TOX4P1
ENSG00000259162.1	-0.485941	-0.567735	0.674675	4.36669e-07	9.03901e-06	6.60226e-05
ENSG00000259379.1	2.55899	0.627996	1.54542	4.34338e-07	8.99734e-06	6.60226e-05	MTND5P32
ENSG00000260528.4	4.87605	0.61628	1.53292	3.85622e-07	8.11218e-06	6.60226e-05	FAM157C
ENSG00000268833.1	-0.506391	0.627085	1.54444	4.1865e-07	8.71527e-06	6.60226e-05
ENSG00000275342.4	2.49591	-0.465026	0.724458	4.03145e-07	8.43372e-06	6.60226e-05	PRAG1
ENSG00000278195.1	2.30763	-0.601894	0.658889	4.31526e-07	8.94699e-06	6.60226e-05	SSTR3
ENSG00000042980.12	5.76832	-0.41467	0.750191	4.75907e-07	9.73151e-06	7.79313e-05	ADAM28
ENSG00000075413.17	7.86921	0.264362	1.2011	4.93688e-07	1.00482e-05	7.79313e-05	MARK3
ENSG00000106682.14	7.0799	-0.168642	0.88968	5.07092e-07	1.02851e-05	7.79313e-05	EIF4H
ENSG00000120659.14	-0.999202	-0.56523	0.675848	5.0447e-07	1.02389e-05	7.79313e-05	TNFSF11
ENSG00000122176.10	-1.77946	-0.650331	0.637134	5.0719e-07	1.02868e-05	7.79313e-05	FMOD
ENSG00000123505.15	7.60828	-0.199746	0.870704	4.92416e-07	1.00257e-05	7.79313e-05	AMD1
ENSG00000124788.17	7.65918	0.250329	1.18948	4.85551e-07	9.90367e-06	7.79313e-05	ATXN1
ENSG00000151694.12	6.47105	0.192427	1.14268	4.87841e-07	9.94441e-06	7.79313e-05	ADAM17
ENSG00000152078.9	3.77954	0.629513	1.54704	5.02327e-07	1.0201e-05	7.79313e-05	TLCD4
ENSG00000169895.5	5.33033	-0.168327	0.889874	5.0446e-07	1.02387e-05	7.79313e-05	SYAP1
ENSG00000203666.12	2.47458	0.367586	1.29019	4.78963e-07	9.78616e-06	7.79313e-05	EFCAB2
ENSG00000216937.13	4.85572	0.363525	1.28657	4.87282e-07	9.93447e-06	7.79313e-05	CCDC7
ENSG00000245719.1	-1.72639	0.432428	1.3495	5.03708e-07	1.02254e-05	7.79313e-05	SKOR1-AS1
ENSG00000101945.16	2.48256	-0.342921	0.788444	5.16869e-07	1.04593e-05	8.77527e-05	SUV39H1
ENSG00000132825.6	5.55953	0.260361	1.19778	5.08523e-07	1.03102e-05	8.77527e-05	PPP1R3D
ENSG00000177971.8	4.87823	-0.226525	0.854691	5.15786e-07	1.044e-05	8.77527e-05	IMP3
ENSG00000004939.13	9.21272	0.875885	1.83513	6.78246e-07	1.32984e-05	0.000101847	SLC4A1
ENSG00000005194.14	4.41034	-0.163607	0.89279	6.10858e-07	1.21346e-05	0.000101847	CIAPIN1
ENSG00000009694.13	4.4566	0.500586	1.41479	7.11128e-07	1.38554e-05	0.000101847	TENM1
ENSG00000011143.16	3.02213	-0.257611	0.836472	6.62832e-07	1.30349e-05	0.000101847	MKS1
ENSG00000011426.10	1.49926	0.484271	1.39888	7.11592e-07	1.38632e-05	0.000101847	ANLN
ENSG00000046653.14	-0.840206	-0.55915	0.678702	7.44957e-07	1.44212e-05	0.000101847	GPM6B
ENSG00000056586.15	7.43616	0.111366	1.08025	7.06554e-07	1.37784e-05	0.000101847	RC3H2
ENSG00000065328.16	0.343147	0.566076	1.48049	6.65752e-07	1.30849e-05	0.000101847	MCM10
ENSG00000066044.14	4.98579	-0.180381	0.88247	7.35721e-07	1.42675e-05	0.000101847	ELAVL1
ENSG00000069020.18	4.36253	0.276065	1.21089	7.94579e-07	1.52381e-05	0.000101847	MAST4
ENSG00000073464.11	4.12374	-0.530612	0.692261	6.28808e-07	1.24476e-05	0.000101847	CLCN4
ENSG00000077616.10	-1.17494	-0.60369	0.658069	7.67856e-07	1.48001e-05	0.000101847	NAALAD2
ENSG00000080822.16	5.95985	0.226572	1.17005	6.71399e-07	1.31815e-05	0.000101847	CLDND1
ENSG00000080823.22	0.932179	-0.534834	0.690238	6.68689e-07	1.31352e-05	0.000101847	MOK
ENSG00000088682.13	4.50245	-0.142585	0.905895	5.98919e-07	1.19252e-05	0.000101847	COQ9
ENSG00000090530.9	-0.731723	-0.528939	0.693064	6.97896e-07	1.36321e-05	0.000101847	P3H2
ENSG00000100307.12	6.48716	-0.298994	0.812819	5.34599e-07	1.078e-05	0.000101847	CBX7
ENSG00000100395.14	4.61494	-0.26376	0.832914	6.24358e-07	1.23702e-05	0.000101847	L3MBTL2
ENSG00000104142.10	5.5223	-0.376011	0.770565	6.24535e-07	1.23733e-05	0.000101847	VPS18
ENSG00000104299.14	4.17801	-0.176569	0.884805	7.88475e-07	1.51384e-05	0.000101847	INTS9
ENSG00000105968.18	6.58655	-0.0985923	0.933944	7.65348e-07	1.47587e-05	0.000101847	H2AZ2
ENSG00000108883.12	6.25383	-0.211038	0.863916	7.48675e-07	1.4483e-05	0.000101847	EFTUD2
ENSG00000110514.19	6.58201	-0.265495	0.831913	7.36651e-07	1.4283e-05	0.000101847	MADD
ENSG00000111737.11	5.3942	-0.2611	0.834452	5.63725e-07	1.13022e-05	0.000101847	RAB35
ENSG00000111961.17	3.0377	0.528322	1.44225	6.75429e-07	1.32504e-05	0.000101847	SASH1
ENSG00000113558.18	6.90161	0.192487	1.14273	5.45614e-07	1.09782e-05	0.000101847	SKP1
ENSG00000114631.10	0.541763	-0.509487	0.702472	6.68218e-07	1.31271e-05	0.000101847	PODXL2
ENSG00000114861.18	7.46427	-0.177222	0.884404	6.15873e-07	1.22222e-05	0.000101847	FOXP1
ENSG00000122025.14	3.09758	-0.51303	0.700749	6.21675e-07	1.23234e-05	0.000101847	FLT3
ENSG00000122490.18	5.93228	0.488658	1.40314	6.18993e-07	1.22767e-05	0.000101847	SLC66A2
ENSG00000125457.13	3.2044	-0.262805	0.833466	7.42259e-07	1.43764e-05	0.000101847	MIF4GD
ENSG00000132773.11	3.63015	-0.204866	0.867619	7.85171e-07	1.50844e-05	0.000101847	TOE1
ENSG00000133119.12	3.03023	-0.237452	0.848242	7.83063e-07	1.50499e-05	0.000101847	RFC3
ENSG00000133858.15	7.76466	0.174516	1.12859	5.16999e-07	1.04616e-05	0.000101847	ZFC3H1
ENSG00000134508.12	-0.725739	-0.568089	0.67451	5.2657e-07	1.0635e-05	0.000101847	CABLES1
ENSG00000134827.7	2.69571	0.69707	1.62121	7.03604e-07	1.37286e-05	0.000101847	TCN1
ENSG00000135773.12	-1.94064	-0.245744	0.843381	5.41791e-07	1.09095e-05	0.000101847	CAPN9
ENSG00000136315.4	-1.0561	0.534442	1.44838	7.28826e-07	1.41523e-05	0.000101847	RNASE2CP
ENSG00000136811.16	4.80305	-0.228239	0.853676	6.51844e-07	1.2846e-05	0.000101847	ODF2
ENSG00000137261.13	3.21171	0.56961	1.48412	7.38516e-07	1.43141e-05	0.000101847	KIAA0319
ENSG00000139714.12	2.04123	-0.403648	0.755945	7.09114e-07	1.38215e-05	0.000101847	MORN3
ENSG00000139842.14	6.99729	0.225392	1.16909	7.05947e-07	1.37681e-05	0.000101847	CUL4A
ENSG00000143167.11	2.4517	-0.4483	0.732906	5.78153e-07	1.15586e-05	0.000101847	GPA33
ENSG00000145244.11	1.27938	0.88306	1.84428	7.1654e-07	1.39464e-05	0.000101847	CORIN
ENSG00000145687.16	6.04413	-0.192751	0.874936	6.00364e-07	1.19506e-05	0.000101847	SSBP2
ENSG00000148110.15	6.67445	0.264605	1.20131	5.24268e-07	1.05934e-05	0.000101847	MFSD14B
ENSG00000148459.15	2.52345	0.265826	1.20232	7.47841e-07	1.44691e-05	0.000101847	PDSS1
ENSG00000151458.11	5.11581	0.284925	1.21835	5.99575e-07	1.19367e-05	0.000101847	ANKRD50
ENSG00000153574.8	6.26234	0.535122	1.44906	7.82495e-07	1.50406e-05	0.000101847	RPIA
ENSG00000156026.14	4.96156	0.193704	1.1437	7.4442e-07	1.44123e-05	0.000101847	MCU
ENSG00000161647.18	-0.358671	0.520596	1.43455	5.44608e-07	1.09602e-05	0.000101847	MPP3
ENSG00000163958.13	-1.25598	0.544501	1.45852	7.73581e-07	1.48943e-05	0.000101847	ZDHHC19
ENSG00000166173.10	-1.83441	-0.278712	0.824327	7.51696e-07	1.45331e-05	0.000101847	LARP6
ENSG00000167779.7	-1.08448	-0.491168	0.711449	6.31279e-07	1.24905e-05	0.000101847	IGFBP6
ENSG00000167987.10	2.94714	-0.453771	0.730132	7.66302e-07	1.47745e-05	0.000101847	VPS37C
ENSG00000168785.7	7.42177	0.646857	1.56575	6.37028e-07	1.25902e-05	0.000101847	TSPAN5
ENSG00000168913.6	0.203676	-0.604835	0.657547	6.55498e-07	1.29089e-05	0.000101847	ENHO
ENSG00000172716.16	6.48289	0.19506	1.14477	7.6615e-07	1.4772e-05	0.000101847	SLFN11
ENSG00000175073.7	7.84079	0.226664	1.17013	6.79504e-07	1.33199e-05	0.000101847	VCPIP1
ENSG00000181029.8	3.5513	-0.275481	0.826175	5.80689e-07	1.16035e-05	0.000101847	TRAPPC5
ENSG00000182831.11	8.22473	0.212217	1.15847	6.86396e-07	1.34371e-05	0.000101847	HAPSTR1
ENSG00000196407.11	-1.25014	0.69583	1.61982	5.56658e-07	1.1176e-05	0.000101847	THEM5
ENSG00000197912.14	6.53667	-0.236217	0.848968	7.37562e-07	1.42982e-05	0.000101847	SPG7
ENSG00000197937.12	4.2297	-0.33202	0.794423	7.89926e-07	1.51622e-05	0.000101847	ZNF347
ENSG00000198643.6	-1.02959	-0.51551	0.699546	6.47849e-07	1.27772e-05	0.000101847	FAM3D
ENSG00000198900.5	6.25182	0.238288	1.17959	5.358e-07	1.08017e-05	0.000101847	TOP1
ENSG00000198947.15	-0.549836	-0.668552	0.629138	5.82259e-07	1.16313e-05	0.000101847	DMD
ENSG00000203739.3	3.23099	0.335732	1.26202	5.83879e-07	1.166e-05	0.000101847	PRDX6-AS1
ENSG00000204304.11	6.63723	-0.317608	0.802399	6.77052e-07	1.32781e-05	0.000101847	PBX2
ENSG00000204923.3	2.8827	0.21402	1.15992	7.04166e-07	1.37381e-05	0.000101847	FBXO48
ENSG00000205426.10	-1.63476	-0.392495	0.761811	6.01913e-07	1.19778e-05	0.000101847	KRT81
ENSG00000217555.12	4.29091	0.295388	1.22721	5.34138e-07	1.07717e-05	0.000101847	CKLF
ENSG00000224950.2	4.25712	0.336418	1.26262	7.68498e-07	1.48107e-05	0.000101847
ENSG00000227057.9	4.69983	-0.282049	0.822422	5.88413e-07	1.17401e-05	0.000101847	WDR46
ENSG00000227508.6	1.9007	-0.424083	0.745312	7.76902e-07	1.49489e-05	0.000101847	LINC01624
ENSG00000232021.6	2.75837	-0.630216	0.64608	6.7684e-07	1.32744e-05	0.000101847	LEF1-AS1
ENSG00000237298.9	7.45001	0.255954	1.19413	5.50181e-07	1.10601e-05	0.000101847	TTN-AS1
ENSG00000242110.7	0.947008	-0.414536	0.750261	7.84354e-07	1.5071e-05	0.000101847	AMACR
ENSG00000248791.1	2.22404	0.347285	1.27216	5.88415e-07	1.17401e-05	0.000101847
ENSG00000250722.5	-0.0130488	0.550701	1.4648	6.83415e-07	1.33864e-05	0.000101847	SELENOP
ENSG00000254481.1	0.481122	-0.596214	0.661488	6.38202e-07	1.26105e-05	0.000101847	PTP4A2P2
ENSG00000255929.5	-1.57141	0.428355	1.3457	6.53565e-07	1.28757e-05	0.000101847	PIWIL4-AS1
ENSG00000264017.2	0.490417	0.433183	1.35021	6.76782e-07	1.32735e-05	0.000101847	RN7SL336P
ENSG00000269243.1	0.00446278	-0.643765	0.64004	6.08941e-07	1.2101e-05	0.000101847
ENSG00000280035.1	3.6441	-0.500454	0.706884	7.41331e-07	1.43609e-05	0.000101847
ENSG00000006007.11	6.50422	0.326845	1.25427	9.64179e-07	1.80228e-05	0.000125495	GDE1
ENSG00000070190.12	7.49315	0.272356	1.20778	9.61644e-07	1.79822e-05	0.000125495	DAPP1
ENSG00000076650.6	3.85981	-0.161063	0.894366	8.9711e-07	1.69383e-05	0.000125495	GPATCH1
ENSG00000102572.14	7.41569	-0.168919	0.889509	8.39529e-07	1.59897e-05	0.000125495	STK24
ENSG00000104918.7	1.94778	0.752279	1.68445	9.62914e-07	1.80025e-05	0.000125495	RETN
ENSG00000105618.13	4.58728	-0.324978	0.798311	8.17471e-07	1.56218e-05	0.000125495	PRPF31
ENSG00000109819.8	-0.755281	-0.754815	0.592622	8.66397e-07	1.64344e-05	0.000125495	PPARGC1A
ENSG00000121807.5	7.34454	0.318531	1.24706	7.95706e-07	1.52565e-05	0.000125495	CCR2
ENSG00000127954.12	8.96709	0.454126	1.36995	8.59882e-07	1.63269e-05	0.000125495	STEAP4
ENSG00000133703.11	6.58488	0.180118	1.13298	8.54262e-07	1.6234e-05	0.000125495	KRAS
ENSG00000135624.15	6.16052	-0.185165	0.879548	8.22115e-07	1.56995e-05	0.000125495	CCT7
ENSG00000136718.9	4.88365	-0.211604	0.863576	9.21064e-07	1.73282e-05	0.000125495	IMP4
ENSG00000145246.13	6.072	-0.20437	0.867918	9.37913e-07	1.76007e-05	0.000125495	ATP10D
ENSG00000148843.13	5.55528	-0.216171	0.860847	8.65751e-07	1.64237e-05	0.000125495	PDCD11
ENSG00000149485.18	3.9569	0.354893	1.27889	8.94285e-07	1.68922e-05	0.000125495	FADS1
ENSG00000152700.13	5.60916	0.154738	1.11322	9.08432e-07	1.71229e-05	0.000125495	SAR1B
ENSG00000155093.17	3.21008	-0.521183	0.6968	9.07691e-07	1.71109e-05	0.000125495	PTPRN2
ENSG00000162722.8	8.41867	0.812521	1.75628	9.59085e-07	1.79412e-05	0.000125495	TRIM58
ENSG00000164329.13	7.23942	0.150166	1.1097	9.16158e-07	1.72485e-05	0.000125495	TENT2
ENSG00000165060.11	2.88009	-0.226074	0.854958	9.4497e-07	1.77144e-05	0.000125495	FXN
ENSG00000165280.15	7.8479	-0.244548	0.84408	8.64256e-07	1.63991e-05	0.000125495	VCP
ENSG00000166313.18	4.43892	-0.397447	0.759201	9.15394e-07	1.72361e-05	0.000125495	APBB1
ENSG00000166813.14	-1.06003	-0.527797	0.693613	8.89564e-07	1.68149e-05	0.000125495	KIF7
ENSG00000175348.10	5.64369	0.211593	1.15797	9.1601e-07	1.72461e-05	0.000125495	TMEM9B
ENSG00000183258.11	5.31671	-0.289114	0.818405	9.46405e-07	1.77375e-05	0.000125495	DDX41
ENSG00000183474.15	2.38293	0.280954	1.215	8.73674e-07	1.65542e-05	0.000125495	GTF2H2C
ENSG00000185760.15	2.60387	-0.37312	0.772111	9.47384e-07	1.77533e-05	0.000125495	KCNQ5
ENSG00000198060.9	4.69496	0.180714	1.13344	9.16276e-07	1.72504e-05	0.000125495	MARCHF5
ENSG00000226479.3	4.45956	0.244768	1.1849	8.74747e-07	1.65718e-05	0.000125495	TMEM185B
ENSG00000244038.9	6.58155	-0.254974	0.838002	8.23101e-07	1.5716e-05	0.000125495	DDOST
ENSG00000256803.1	-1.3491	0.492978	1.40735	9.57044e-07	1.79085e-05	0.000125495
ENSG00000259671.1	2.02252	0.590562	1.50583	9.5398e-07	1.78593e-05	0.000125495	MTCYBP23
ENSG00000260855.1	1.22389	-0.463349	0.7253	9.24155e-07	1.73783e-05	0.000125495
ENSG00000261542.1	1.41607	0.36348	1.28653	8.32964e-07	1.58804e-05	0.000125495
ENSG00000263368.1	-0.991447	-0.525655	0.694643	8.38441e-07	1.59716e-05	0.000125495	MSANTD3P1
ENSG00000266401.1	0.835076	-0.594369	0.662334	9.22869e-07	1.73574e-05	0.000125495
ENSG00000277496.1	3.55725	-0.345707	0.786922	8.12529e-07	1.55391e-05	0.000125495	SLCO4A1-AS2
ENSG00000279598.1	5.02299	0.312722	1.24205	8.63453e-07	1.63858e-05	0.000125495
ENSG00000281469.1	2.14583	0.345715	1.27078	8.95906e-07	1.69187e-05	0.000125495
ENSG00000283444.1	1.83899	0.534547	1.44849	8.37933e-07	1.59631e-05	0.000125495	GPR141BP
ENSG00000006740.16	-1.35194	-0.638766	0.642262	1.01493e-06	1.88597e-05	0.000161274	ARHGAP44
ENSG00000043143.20	6.60205	-0.284587	0.820977	1.03993e-06	1.92687e-05	0.000161274	JADE2
ENSG00000054611.13	6.40242	-0.267296	0.830875	1.05805e-06	1.95638e-05	0.000161274	TBC1D22A
ENSG00000066468.22	1.60789	-0.882175	0.542549	1.05227e-06	1.94698e-05	0.000161274	FGFR2
ENSG00000067900.7	7.64749	0.223482	1.16755	1.25975e-06	2.27669e-05	0.000161274	ROCK1
ENSG00000072958.8	5.85466	-0.255207	0.837867	1.03402e-06	1.91723e-05	0.000161274	AP1M1
ENSG00000081760.16	3.57755	-0.274207	0.826905	1.22161e-06	2.21723e-05	0.000161274	AACS
ENSG00000082516.8	4.87071	-0.197198	0.872243	1.24315e-06	2.25087e-05	0.000161274	GEMIN5
ENSG00000092201.9	6.37201	-0.160076	0.894978	1.23581e-06	2.23942e-05	0.000161274	SUPT16H
ENSG00000100697.14	8.69153	-0.213901	0.862203	1.18066e-06	2.15283e-05	0.000161274	DICER1
ENSG00000101216.10	4.65859	-0.317294	0.802574	9.65397e-07	1.80423e-05	0.000161274	GMEB2
ENSG00000101361.16	5.77809	-0.200567	0.870209	1.15026e-06	2.10463e-05	0.000161274	NOP56
ENSG00000101460.12	1.62186	-0.574445	0.671545	1.14673e-06	2.09902e-05	0.000161274	MAP1LC3A
ENSG00000105127.8	5.47607	-0.149837	0.901353	1.15616e-06	2.11402e-05	0.000161274	AKAP8
ENSG00000106305.9	2.88462	-0.235771	0.849231	1.18541e-06	2.16033e-05	0.000161274	AIMP2
ENSG00000113924.11	2.15341	-0.385598	0.765462	1.26848e-06	2.29022e-05	0.000161274	HGD
ENSG00000116133.11	2.33096	0.480166	1.3949	1.29817e-06	2.33606e-05	0.000161274	DHCR24
ENSG00000117632.22	3.92358	-0.307751	0.8079	1.19702e-06	2.17863e-05	0.000161274	STMN1
ENSG00000118473.21	0.247537	0.761467	1.69521	1.2711e-06	2.29429e-05	0.000161274	SGIP1
ENSG00000122008.15	5.68174	0.25212	1.19096	1.04712e-06	1.9386e-05	0.000161274	POLK
ENSG00000122958.14	4.83765	0.193298	1.14337	1.2787e-06	2.30604e-05	0.000161274	VPS26A
ENSG00000123685.8	1.22188	-0.443031	0.735588	1.1413e-06	2.09037e-05	0.000161274	BATF3
ENSG00000124535.15	5.65385	-0.144723	0.904553	1.11366e-06	2.04616e-05	0.000161274	WRNIP1
ENSG00000130779.19	6.5741	0.175223	1.12914	1.22185e-06	2.21761e-05	0.000161274	CLIP1
ENSG00000131966.13	5.35981	0.178058	1.13136	1.28695e-06	2.31877e-05	0.000161274	ACTR10
ENSG00000134757.4	-1.57846	-0.430095	0.742213	1.29335e-06	2.32864e-05	0.000161274	DSG3
ENSG00000135312.6	-1.71027	-0.388297	0.764031	1.1525e-06	2.10819e-05	0.000161274	HTR1B
ENSG00000135776.4	5.9642	0.329077	1.25621	9.81144e-07	1.83032e-05	0.000161274	ABCB10
ENSG00000137965.10	5.16036	0.81146	1.75499	1.00281e-06	1.86606e-05	0.000161274	IFI44
ENSG00000142208.15	7.28889	-0.390843	0.762684	1.24515e-06	2.25399e-05	0.000161274	AKT1
ENSG00000147996.16	3.45786	0.309577	1.23934	9.95495e-07	1.85401e-05	0.000161274	ZNG1E
ENSG00000149136.8	5.06803	-0.227521	0.854101	1.22017e-06	2.21498e-05	0.000161274	SSRP1
ENSG00000153975.9	3.74003	0.283329	1.217	1.2596e-06	2.27645e-05	0.000161274	ZUP1
ENSG00000155957.17	5.53939	0.201756	1.1501	1.17265e-06	2.14017e-05	0.000161274	TMBIM4
ENSG00000156467.9	4.54319	0.504244	1.41838	1.20026e-06	2.18374e-05	0.000161274	UQCRB
ENSG00000162408.10	5.29175	-0.203622	0.868368	1.26898e-06	2.291e-05	0.000161274	NOL9
ENSG00000167642.12	4.78054	-0.289893	0.817963	1.01884e-06	1.89239e-05	0.000161274	SPINT2
ENSG00000168763.15	4.79796	-0.294672	0.815258	1.19242e-06	2.17139e-05	0.000161274	CNNM3
ENSG00000168792.4	4.85127	-0.220328	0.858371	1.18307e-06	2.15663e-05	0.000161274	ABHD15
ENSG00000172006.11	2.62578	-0.269307	0.829718	1.22973e-06	2.22993e-05	0.000161274	ZNF554
ENSG00000173320.11	-0.811903	0.625593	1.54284	1.22678e-06	2.22532e-05	0.000161274	STOX2
ENSG00000175283.7	2.37698	-0.289002	0.818468	9.82802e-07	1.83306e-05	0.000161274	DOLK
ENSG00000176390.11	7.36866	-0.168425	0.889814	1.28369e-06	2.31374e-05	0.000161274	CRLF3
ENSG00000176974.19	3.24557	-0.333143	0.793805	1.18919e-06	2.16629e-05	0.000161274	SHMT1
ENSG00000177301.14	1.89699	0.381003	1.30225	1.29299e-06	2.32809e-05	0.000161274	KCNA2
ENSG00000183647.10	3.57141	-0.221648	0.857585	1.22601e-06	2.22412e-05	0.000161274	ZNF530
ENSG00000184924.5	2.79046	0.307534	1.23759	1.12489e-06	2.06415e-05	0.000161274	PTRHD1
ENSG00000186660.14	5.71571	-0.137471	0.909112	9.88857e-07	1.84306e-05	0.000161274	ZFP91
ENSG00000187231.13	5.37876	0.292753	1.22498	1.0344e-06	1.91785e-05	0.000161274	SESTD1
ENSG00000189127.7	1.07499	0.822552	1.76853	1.14188e-06	2.09129e-05	0.000161274	ANKRD34B
ENSG00000204439.3	5.66821	-0.193833	0.87428	1.21572e-06	2.208e-05	0.000161274	C6orf47
ENSG00000214975.4	0.82647	0.56395	1.47831	1.28057e-06	2.30892e-05	0.000161274	PPIAP29
ENSG00000225802.3	-1.4317	-0.424364	0.745167	1.08181e-06	1.99489e-05	0.000161274	WARS1P1
ENSG00000228033.5	-1.89064	-0.307521	0.808029	1.13969e-06	2.0878e-05	0.000161274
ENSG00000235920.1	-1.75939	-0.424941	0.744869	1.16667e-06	2.1307e-05	0.000161274	THRAP3P3
ENSG00000238009.6	0.367937	0.661182	1.58138	1.25024e-06	2.26191e-05	0.000161274
ENSG00000248477.6	-0.330397	0.557955	1.47218	1.29314e-06	2.32832e-05	0.000161274	NAIPP3
ENSG00000251139.2	-0.597711	0.607868	1.52401	1.12888e-06	2.07054e-05	0.000161274
ENSG00000255595.2	-1.21982	-0.623923	0.648904	1.19781e-06	2.17988e-05	0.000161274	LINC02350
ENSG00000255801.1	4.133	-0.626876	0.647577	1.26915e-06	2.29125e-05	0.000161274
ENSG00000260401.1	2.82973	-0.555088	0.680616	1.14018e-06	2.08858e-05	0.000161274
ENSG00000270562.1	3.67991	-0.277074	0.825263	1.12152e-06	2.05875e-05	0.000161274	FOXP1-DT
ENSG00000273017.1	0.108811	0.437324	1.35409	1.04538e-06	1.93576e-05	0.000161274
ENSG00000283994.1	4.44821	0.285149	1.21854	1.10454e-06	2.03151e-05	0.000161274
ENSG00000111052.7	6.26292	0.426355	1.34383	1.33409e-06	2.39134e-05	0.000165638	LIN7A
ENSG00000140987.19	5.09471	-0.113932	0.924066	1.33317e-06	2.38993e-05	0.000165638	ZSCAN32
ENSG00000142512.14	6.53704	-0.452005	0.731026	1.30289e-06	2.34332e-05	0.000165638	SIGLEC10
ENSG00000164674.15	5.98014	-0.287305	0.819431	1.31135e-06	2.35638e-05	0.000165638	SYTL3
ENSG00000166866.12	0.0321842	-0.46256	0.725697	1.31815e-06	2.36685e-05	0.000165638	MYO1A
ENSG00000259056.1	-1.21432	-0.599657	0.659911	1.33339e-06	2.39026e-05	0.000165638	DUXAP1
ENSG00000037280.15	1.5802	-0.640382	0.641543	1.48602e-06	2.62807e-05	0.000201257	FLT4
ENSG00000049541.10	4.17046	-0.211181	0.86383	1.47958e-06	2.61816e-05	0.000201257	RFC2
ENSG00000108239.8	3.64203	0.322928	1.25087	1.45773e-06	2.58445e-05	0.000201257	TBC1D12
ENSG00000109917.10	5.34418	-0.141668	0.90647	1.36917e-06	2.44654e-05	0.000201257	ZPR1
ENSG00000113194.12	5.86205	-0.11226	0.925137	1.45032e-06	2.57301e-05	0.000201257	FAF2
ENSG00000121236.20	-0.411265	0.653	1.57244	1.39071e-06	2.48028e-05	0.000201257	TRIM6
ENSG00000125356.6	4.20148	0.31768	1.24633	1.4125e-06	2.51429e-05	0.000201257	NDUFA1
ENSG00000126353.3	6.2222	-0.499336	0.707432	1.48769e-06	2.63063e-05	0.000201257	CCR7
ENSG00000129235.10	3.7976	0.253564	1.19215	1.37937e-06	2.46254e-05	0.000201257	TXNDC17
ENSG00000139329.4	-1.79118	-0.362139	0.77801	1.44004e-06	2.55708e-05	0.000201257	LUM
ENSG00000163166.14	6.10699	-0.133458	0.911644	1.34433e-06	2.40745e-05	0.000201257	IWS1
ENSG00000167434.9	3.44381	0.605094	1.52108	1.44015e-06	2.55726e-05	0.000201257	CA4
ENSG00000167721.10	4.96301	-0.186486	0.878744	1.45189e-06	2.57543e-05	0.000201257	TSR1
ENSG00000169621.9	3.46904	0.34381	1.2691	1.43912e-06	2.55566e-05	0.000201257	APLF
ENSG00000172000.7	-1.12721	-0.470364	0.721782	1.39624e-06	2.48893e-05	0.000201257	ZNF556
ENSG00000172795.15	8.68992	0.222507	1.16676	1.48559e-06	2.62741e-05	0.000201257	DCP2
ENSG00000177427.12	3.85302	-0.284768	0.820874	1.45939e-06	2.58702e-05	0.000201257	MIEF2
ENSG00000178074.5	3.52575	0.256436	1.19452	1.38392e-06	2.46965e-05	0.000201257	C2orf69
ENSG00000183826.16	5.84863	-0.156083	0.897458	1.33488e-06	2.39255e-05	0.000201257	BTBD9
ENSG00000185973.10	5.21591	0.182548	1.13489	1.48101e-06	2.62036e-05	0.000201257	TMLHE
ENSG00000198355.4	5.65884	0.396325	1.31615	1.37647e-06	2.45799e-05	0.000201257	PIM3
ENSG00000271141.1	2.20328	0.340424	1.26613	1.34987e-06	2.41618e-05	0.000201257
ENSG00000276809.1	2.29206	0.40136	1.32075	1.42845e-06	2.5391e-05	0.000201257
ENSG00000278730.1	6.03879	-0.147088	0.903072	1.47734e-06	2.6147e-05	0.000201257
ENSG00000075884.13	8.23233	0.23154	1.17409	1.49039e-06	2.63478e-05	0.000211516	ARHGAP15
ENSG00000079277.19	6.85189	0.300319	1.23142	1.50568e-06	2.65841e-05	0.000211516	MKNK1
ENSG00000083750.12	4.1511	0.15779	1.11558	1.54679e-06	2.72165e-05	0.000211516	RRAGB
ENSG00000087502.17	5.52972	0.31062	1.24024	1.53253e-06	2.69977e-05	0.000211516	ERGIC2
ENSG00000089057.14	6.22967	-0.217804	0.859873	1.58319e-06	2.7773e-05	0.000211516	SLC23A2
ENSG00000100246.12	2.41844	-0.296997	0.813945	1.5894e-06	2.78675e-05	0.000211516	DNAL4
ENSG00000105516.10	4.0408	-0.267444	0.83079	1.5746e-06	2.7642e-05	0.000211516	DBP
ENSG00000116990.10	4.59658	-0.31671	0.802899	1.58296e-06	2.77695e-05	0.000211516	MYCL
ENSG00000122591.11	6.09313	0.219127	1.16403	1.58769e-06	2.78416e-05	0.000211516	HYCC1
ENSG00000132274.15	8.83297	0.326961	1.25437	1.57718e-06	2.76814e-05	0.000211516	TRIM22
ENSG00000142166.12	7.53225	0.238138	1.17947	1.55261e-06	2.73057e-05	0.000211516	IFNAR1
ENSG00000170260.8	4.12193	-0.218065	0.859718	1.51796e-06	2.67735e-05	0.000211516	ZNF212
ENSG00000189430.12	3.58723	-0.430345	0.742084	1.54775e-06	2.72313e-05	0.000211516	NCR1
ENSG00000225411.2	-0.299339	0.511786	1.42581	1.56509e-06	2.74967e-05	0.000211516
ENSG00000241157.1	2.68913	0.369597	1.29199	1.50106e-06	2.65128e-05	0.000211516	RPL32P32
ENSG00000006744.18	5.77357	-0.184937	0.879687	1.7644e-06	3.05153e-05	0.000222808	ELAC2
ENSG00000010438.16	-1.6258	-0.373461	0.771929	1.65088e-06	2.88057e-05	0.000222808	PRSS3
ENSG00000040531.14	3.78424	-0.252873	0.839224	1.65813e-06	2.89159e-05	0.000222808	CTNS
ENSG00000057019.15	1.28502	-0.434376	0.740014	1.84931e-06	3.17744e-05	0.000222808	DCBLD2
ENSG00000058272.16	7.87156	0.230237	1.17303	1.83593e-06	3.15771e-05	0.000222808	PPP1R12A
ENSG00000067248.9	5.41475	0.218386	1.16343	1.67378e-06	2.9153e-05	0.000222808	DHX29
ENSG00000070010.18	5.50115	0.131011	1.09506	1.74076e-06	3.01618e-05	0.000222808	UFD1
ENSG00000078487.17	2.7303	-0.222523	0.857065	1.59253e-06	2.79152e-05	0.000222808	ZCWPW1
ENSG00000081026.18	2.60341	0.344418	1.26964	1.82649e-06	3.14377e-05	0.000222808	MAGI3
ENSG00000100056.11	4.39751	-0.293213	0.816083	1.64528e-06	2.87207e-05	0.000222808	ESS2
ENSG00000100744.14	4.31562	0.308463	1.23839	1.78774e-06	3.08631e-05	0.000222808	GSKIP
ENSG00000109906.13	3.89607	-0.499777	0.707216	1.87325e-06	3.21264e-05	0.000222808	ZBTB16
ENSG00000115641.18	1.57581	0.603366	1.51926	1.84081e-06	3.16491e-05	0.000222808	FHL2
ENSG00000129173.12	-0.686071	0.506394	1.4205	1.66491e-06	2.90186e-05	0.000222808	E2F8
ENSG00000136634.5	-1.59948	0.406715	1.32566	1.86911e-06	3.20657e-05	0.000222808	IL10
ENSG00000136710.9	4.81228	-0.166365	0.891085	1.87595e-06	3.21661e-05	0.000222808	CCDC115
ENSG00000139514.12	4.38729	0.303489	1.23413	1.85768e-06	3.18976e-05	0.000222808	SLC7A1
ENSG00000143869.6	1.92885	-0.827528	0.563494	1.61058e-06	2.81916e-05	0.000222808	GDF7
ENSG00000149256.15	-0.0577521	-0.915846	0.530033	1.7733e-06	3.0648e-05	0.000222808	TENM4
ENSG00000150556.16	-0.778833	-0.623711	0.648999	1.80508e-06	3.11205e-05	0.000222808	LYPD6B
ENSG00000151292.17	5.03605	0.337068	1.26319	1.6167e-06	2.82851e-05	0.000222808	CSNK1G3
ENSG00000156414.18	2.84426	0.596191	1.51172	1.81477e-06	3.12642e-05	0.000222808	TDRD9
ENSG00000161204.11	5.21803	-0.206002	0.866937	1.84906e-06	3.17707e-05	0.000222808	ABCF3
ENSG00000163349.21	8.43776	0.236257	1.17793	1.86623e-06	3.20232e-05	0.000222808	HIPK1
ENSG00000166387.11	4.56426	-0.302935	0.810602	1.68673e-06	2.9349e-05	0.000222808	PPFIBP2
ENSG00000174307.6	-0.273608	0.513651	1.42766	1.86425e-06	3.19942e-05	0.000222808	PHLDA3
ENSG00000175445.14	0.404792	-0.784801	0.580432	1.76263e-06	3.04888e-05	0.000222808	LPL
ENSG00000182308.6	1.5434	0.368786	1.29127	1.79667e-06	3.09957e-05	0.000222808	DCAF4L1
ENSG00000182541.17	7.72635	0.443373	1.35978	1.63905e-06	2.86259e-05	0.000222808	LIMK2
ENSG00000183134.4	4.17789	-0.594926	0.662079	1.78006e-06	3.07488e-05	0.000222808	PTGDR2
ENSG00000185010.13	2.35909	0.314414	1.24351	1.78869e-06	3.08771e-05	0.000222808	F8
ENSG00000204576.11	3.59405	-0.167249	0.890539	1.85519e-06	3.1861e-05	0.000222808	PRR3
ENSG00000213626.11	7.4733	-0.324171	0.798757	1.70182e-06	2.95766e-05	0.000222808	LBH
ENSG00000240012.1	-0.656816	-0.576598	0.670543	1.65697e-06	2.88983e-05	0.000222808	SLC9A9-AS1
ENSG00000242986.2	-1.28366	0.603593	1.5195	1.73134e-06	3.00205e-05	0.000222808	RPL21P99
ENSG00000247199.3	0.403604	0.409624	1.32834	1.80398e-06	3.11043e-05	0.000222808	FBXO38-DT
ENSG00000249662.5	2.67184	-0.51028	0.702086	1.76684e-06	3.05516e-05	0.000222808	LINC02218
ENSG00000257495.5	0.139138	-0.691868	0.619052	1.85833e-06	3.19071e-05	0.000222808	KRT73-AS1
ENSG00000259600.2	2.86149	0.550872	1.46497	1.73818e-06	3.01231e-05	0.000222808
ENSG00000279569.1	-0.972228	-0.561899	0.67741	1.86952e-06	3.20716e-05	0.000222808
ENSG00000043093.13	7.01338	0.352049	1.27637	1.93956e-06	3.31185e-05	0.000264005	DCUN1D1
ENSG00000078070.12	4.71726	-0.152309	0.899809	1.96487e-06	3.34958e-05	0.000264005	MCCC1
ENSG00000089041.16	5.05351	0.30474	1.2352	1.96798e-06	3.3542e-05	0.000264005	P2RX7
ENSG00000112972.14	4.77488	0.188478	1.13956	1.91402e-06	3.27365e-05	0.000264005	HMGCS1
ENSG00000151117.8	1.78296	-0.339925	0.790082	1.90897e-06	3.26608e-05	0.000264005	TMEM86A
ENSG00000152240.12	3.0294	0.34081	1.26647	1.96098e-06	3.34379e-05	0.000264005	HAUS1
ENSG00000155256.17	6.19866	-0.22899	0.853232	1.92902e-06	3.2961e-05	0.000264005	ZFYVE27
ENSG00000185825.15	5.65619	-0.258078	0.836201	1.87946e-06	3.22175e-05	0.000264005	BCAP31
ENSG00000188211.8	2.84974	-0.324515	0.798567	1.93365e-06	3.30302e-05	0.000264005	NCR3LG1
ENSG00000188994.12	8.00515	0.26779	1.20396	1.91756e-06	3.27894e-05	0.000264005	ZNF292
ENSG00000221978.11	7.57963	-0.13267	0.912142	1.95173e-06	3.33e-05	0.000264005	CCNL2
ENSG00000006576.16	6.07654	0.232427	1.17481	2.22078e-06	3.7261e-05	0.000272374	PHTF2
ENSG00000013561.17	6.68662	0.377127	1.29875	2.20773e-06	3.70719e-05	0.000272374	RNF14
ENSG00000070182.19	6.52577	0.913735	1.88392	2.25189e-06	3.77107e-05	0.000272374	SPTB
ENSG00000076242.14	5.22861	-0.128698	0.914656	2.08351e-06	3.52559e-05	0.000272374	MLH1
ENSG00000087085.13	0.184291	0.763549	1.69766	2.07958e-06	3.5198e-05	0.000272374	ACHE
ENSG00000094880.10	4.84742	-0.1627	0.893352	2.18881e-06	3.6797e-05	0.000272374	CDC23
ENSG00000100453.12	5.78526	-0.506456	0.70395	2.30446e-06	3.84668e-05	0.000272374	GZMB
ENSG00000100991.11	7.26954	-0.170128	0.888764	2.31105e-06	3.85611e-05	0.000272374	TRPC4AP
ENSG00000101407.12	5.42316	-0.121012	0.919543	2.29825e-06	3.83777e-05	0.000272374	TTI1
ENSG00000106615.9	4.63681	0.171959	1.12659	2.08434e-06	3.52681e-05	0.000272374	RHEB
ENSG00000109475.16	5.68532	0.64787	1.56685	2.12884e-06	3.59219e-05	0.000272374	RPL34
ENSG00000110321.16	8.58053	0.114408	1.08253	2.05864e-06	3.4889e-05	0.000272374	EIF4G2
ENSG00000112695.11	4.65949	0.295545	1.22735	2.11053e-06	3.56533e-05	0.000272374	COX7A2
ENSG00000115306.15	7.69861	-0.27033	0.82913	2.14681e-06	3.61847e-05	0.000272374	SPTBN1
ENSG00000134769.21	0.608189	0.502065	1.41624	2.08781e-06	3.53193e-05	0.000272374	DTNA
ENSG00000135473.14	5.69152	-0.201194	0.869831	2.28391e-06	3.81717e-05	0.000272374	PAN2
ENSG00000143995.19	2.6125	-0.462501	0.725727	2.18082e-06	3.66808e-05	0.000272374	MEIS1
ENSG00000144048.10	5.2382	-0.110566	0.926224	2.08198e-06	3.52333e-05	0.000272374	DUSP11
ENSG00000148814.17	3.02676	-0.257043	0.836801	2.18522e-06	3.67449e-05	0.000272374	LRRC27
ENSG00000164258.11	2.99007	0.331968	1.25873	2.29209e-06	3.82893e-05	0.000272374	NDUFS4
ENSG00000165030.3	5.31933	0.373899	1.29585	2.03588e-06	3.45522e-05	0.000272374	NFIL3
ENSG00000167110.17	5.3043	-0.269298	0.829723	2.22677e-06	3.73477e-05	0.000272374	GOLGA2
ENSG00000168781.21	2.78608	-0.263001	0.833353	2.21584e-06	3.71894e-05	0.000272374	PPIP5K1
ENSG00000178814.16	2.32353	0.635776	1.55377	2.30473e-06	3.84705e-05	0.000272374	OPLAH
ENSG00000182774.10	5.8526	0.492021	1.40641	2.24136e-06	3.75587e-05	0.000272374	RPS17
ENSG00000183421.11	-1.08749	-0.570327	0.673464	1.97296e-06	3.36161e-05	0.000272374	RIPK4
ENSG00000183579.15	0.496521	-0.437837	0.73824	2.13405e-06	3.59981e-05	0.000272374	ZNRF3
ENSG00000187713.6	4.44096	-0.199638	0.870769	2.26159e-06	3.78506e-05	0.000272374	TMEM203
ENSG00000187942.11	-1.15582	-0.496346	0.7089	2.23193e-06	3.74224e-05	0.000272374	LDLRAD2
ENSG00000203497.2	1.99113	-0.379493	0.768708	2.07728e-06	3.51641e-05	0.000272374	PDCD4-AS1
ENSG00000206053.12	4.48984	-0.167503	0.890383	2.09337e-06	3.54012e-05	0.000272374	JPT2
ENSG00000223584.1	0.757233	0.560975	1.47527	2.01708e-06	3.42732e-05	0.000272374	TVP23CP1
ENSG00000225611.1	1.8627	-0.475246	0.719344	2.24883e-06	3.76665e-05	0.000272374	CCDC13-AS2
ENSG00000226640.2	-0.519304	0.547548	1.4616	2.152e-06	3.62605e-05	0.000272374
ENSG00000232680.2	0.98544	0.57273	1.48734	2.1572e-06	3.63366e-05	0.000272374
ENSG00000239941.1	0.846095	-0.432722	0.740863	2.2407e-06	3.75491e-05	0.000272374	LINC02917
ENSG00000259182.5	0.41923	0.596881	1.51244	2.06133e-06	3.49288e-05	0.000272374
ENSG00000261367.1	0.0844316	-0.570568	0.673352	2.16169e-06	3.6402e-05	0.000272374
ENSG00000267481.1	3.50168	-0.222756	0.856927	2.12698e-06	3.58946e-05	0.000272374
ENSG00000169554.18	9.35517	0.214445	1.16026	2.31495e-06	3.86169e-05	0.000282195	ZEB2
ENSG00000002745.12	0.357396	-0.766549	0.587822	2.33638e-06	3.89258e-05	0.000288295	WNT16
ENSG00000073614.12	8.86847	-0.123896	0.917706	2.38112e-06	3.95689e-05	0.000288295	KDM5A
ENSG00000124541.6	4.9404	-0.142321	0.90606	2.3885e-06	3.96747e-05	0.000288295	RRP36
ENSG00000169403.11	8.51229	-0.39326	0.761407	2.39702e-06	3.97966e-05	0.000288295	PTAFR
ENSG00000175984.14	1.92794	-0.399639	0.758048	2.3475e-06	3.90859e-05	0.000288295	DENND2C
ENSG00000198087.7	5.30952	0.286552	1.21972	2.36612e-06	3.93536e-05	0.000288295	CD2AP
ENSG00000231123.1	-1.22547	0.449267	1.36535	2.38171e-06	3.95773e-05	0.000288295	SPATA20P1
ENSG00000238741.1	6.29948	0.630251	1.54783	2.39972e-06	3.98353e-05	0.000288295	SCARNA7
ENSG00000276248.1	3.32512	0.33569	1.26198	2.32403e-06	3.87477e-05	0.000288295
ENSG00000005022.5	6.2556	-0.180042	0.882677	2.57993e-06	4.23901e-05	0.000290559	SLC25A5
ENSG00000034053.14	5.29996	-0.384754	0.76591	2.46527e-06	4.07706e-05	0.000290559	APBA2
ENSG00000100227.17	6.38385	-0.213391	0.862507	2.51242e-06	4.14391e-05	0.000290559	POLDIP3
ENSG00000124507.10	-0.405872	-0.551765	0.682185	2.47646e-06	4.09295e-05	0.000290559	PACSIN1
ENSG00000125691.12	6.6184	0.574355	1.48901	2.53884e-06	4.18121e-05	0.000290559	RPL23
ENSG00000133805.15	6.11996	0.234026	1.17611	2.59906e-06	4.26583e-05	0.000290559	AMPD3
ENSG00000138744.14	6.37241	-0.272302	0.827997	2.57761e-06	4.23576e-05	0.000290559	NAAA
ENSG00000140326.12	3.88469	-0.26581	0.831731	2.59405e-06	4.25882e-05	0.000290559	CDAN1
ENSG00000149658.17	5.0984	-0.135936	0.910079	2.48385e-06	4.10344e-05	0.000290559	YTHDF1
ENSG00000163374.19	5.95926	0.244687	1.18484	2.49548e-06	4.11994e-05	0.000290559	YY1AP1
ENSG00000164967.9	3.90231	-0.283191	0.821771	2.47647e-06	4.09297e-05	0.000290559	RPP25L
ENSG00000166326.6	6.70541	-0.146151	0.903658	2.53059e-06	4.16958e-05	0.000290559	TRIM44
ENSG00000169442.8	7.25902	0.382615	1.3037	2.49485e-06	4.11904e-05	0.000290559	CD52
ENSG00000179253.3	2.0454	-0.588958	0.664823	2.58905e-06	4.25181e-05	0.000290559
ENSG00000183044.11	5.03829	-0.347312	0.786047	2.51998e-06	4.1546e-05	0.000290559	ABAT
ENSG00000198429.9	2.54285	-0.310448	0.806391	2.40757e-06	3.99474e-05	0.000290559	ZNF69
ENSG00000224177.6	2.5679	0.642905	1.56147	2.57254e-06	4.22864e-05	0.000290559	LINC00570
ENSG00000233461.5	1.42033	0.430319	1.34753	2.44212e-06	4.0441e-05	0.000290559
ENSG00000258405.9	0.856658	-0.413319	0.750894	2.60803e-06	4.27839e-05	0.000290559	ZNF578
ENSG00000259411.1	-2.03154	-0.197541	0.872036	2.61235e-06	4.28443e-05	0.000290559	HNRNPA1P45
ENSG00000259418.1	0.733829	0.532522	1.44646	2.55461e-06	4.20343e-05	0.000290559
ENSG00000259768.5	1.49809	-0.380022	0.768426	2.60546e-06	4.2748e-05	0.000290559	ZFHX3-AS1
ENSG00000005156.11	5.50908	-0.178835	0.883416	2.81143e-06	4.56762e-05	0.000344654	LIG3
ENSG00000006712.14	3.94778	-0.256836	0.836921	2.8139e-06	4.57109e-05	0.000344654	PAF1
ENSG00000007350.16	2.15938	-0.572845	0.67229	3.04969e-06	4.89968e-05	0.000344654	TKTL1
ENSG00000008853.16	3.1152	-0.375012	0.771099	3.02097e-06	4.86004e-05	0.000344654	RHOBTB2
ENSG00000072840.12	1.0834	0.524594	1.43853	2.92742e-06	4.7302e-05	0.000344654	EVC
ENSG00000100105.17	4.46302	-0.241396	0.845926	2.95681e-06	4.77111e-05	0.000344654	PATZ1
ENSG00000105732.12	3.44962	-0.389697	0.76329	2.97895e-06	4.80187e-05	0.000344654	ZNF574
ENSG00000109805.9	1.77138	0.532701	1.44663	2.92066e-06	4.72078e-05	0.000344654	NCAPG
ENSG00000112303.13	9.50397	0.454635	1.37044	2.84442e-06	4.61404e-05	0.000344654	VNN2
ENSG00000114030.12	6.96968	0.153151	1.112	2.97653e-06	4.7985e-05	0.000344654	KPNA1
ENSG00000140025.15	1.89404	-0.276847	0.825393	2.61336e-06	4.28585e-05	0.000344654	EFCAB11
ENSG00000140948.11	4.38944	-0.191254	0.875844	2.99572e-06	4.82512e-05	0.000344654	ZCCHC14
ENSG00000141002.19	6.51198	-0.271036	0.828724	3.00286e-06	4.835e-05	0.000344654	TCF25
ENSG00000143416.20	7.29821	0.785283	1.72343	2.75222e-06	4.48395e-05	0.000344654	SELENBP1
ENSG00000143494.15	-0.906917	-0.48069	0.716635	2.94746e-06	4.75811e-05	0.000344654	VASH2
ENSG00000145391.13	5.57925	0.180124	1.13298	2.95456e-06	4.76798e-05	0.000344654	SETD7
ENSG00000146278.10	7.4576	0.201412	1.14982	2.67598e-06	4.37549e-05	0.000344654	PNRC1
ENSG00000160963.13	-1.281	-0.606544	0.656768	3.04013e-06	4.8865e-05	0.000344654	COL26A1
ENSG00000162520.14	-0.738838	0.466787	1.38203	2.85325e-06	4.62644e-05	0.000344654	SYNC
ENSG00000169814.12	4.3901	-0.163722	0.892719	2.99086e-06	4.81837e-05	0.000344654	BTD
ENSG00000170837.2	4.34498	0.435141	1.35204	2.73771e-06	4.46336e-05	0.000344654	GPR27
ENSG00000170954.11	0.420825	-0.629061	0.646597	2.92292e-06	4.72393e-05	0.000344654	ZNF415
ENSG00000171612.6	1.81124	-0.259768	0.835222	2.84217e-06	4.61088e-05	0.000344654	SLC25A33
ENSG00000173818.16	3.15156	-0.252418	0.839488	2.89044e-06	4.67856e-05	0.000344654	ENDOV
ENSG00000175591.11	2.9402	-0.507756	0.703315	2.76022e-06	4.49528e-05	0.000344654	P2RY2
ENSG00000178722.12	-1.56403	-0.438162	0.738074	2.82359e-06	4.58474e-05	0.000344654	C5orf64
ENSG00000185880.12	6.13053	0.22475	1.16857	2.75817e-06	4.49238e-05	0.000344654	TRIM69
ENSG00000188886.3	-1.0931	-0.455111	0.729454	2.93396e-06	4.73932e-05	0.000344654	ASTL
ENSG00000196684.12	6.08889	-0.390971	0.762616	3.05204e-06	4.90292e-05	0.000344654	HSH2D
ENSG00000197054.11	2.19775	-0.301238	0.811556	2.74797e-06	4.47791e-05	0.000344654	ZNF763
ENSG00000197362.14	3.83231	-0.216317	0.86076	2.95816e-06	4.773e-05	0.000344654	ZNF786
ENSG00000198169.8	4.27281	-0.20168	0.869537	2.87024e-06	4.65027e-05	0.000344654	ZNF251
ENSG00000204740.10	-1.39018	-0.438002	0.738156	2.72457e-06	4.4447e-05	0.000344654	MALRD1
ENSG00000213090.2	3.29538	0.27334	1.2086	2.77883e-06	4.5216e-05	0.000344654	SCYL2P1
ENSG00000214279.13	3.56948	-0.487189	0.713414	3.03203e-06	4.87533e-05	0.000344654	SCART1
ENSG00000240934.2	-1.40289	0.452724	1.36862	3.00471e-06	4.83756e-05	0.000344654
ENSG00000258869.1	-1.53856	-0.317829	0.802276	2.87452e-06	4.65628e-05	0.000344654	LINC02312
ENSG00000261879.5	1.60026	-0.336087	0.792187	2.70307e-06	4.41411e-05	0.000344654	ZNF594-DT
ENSG00000273644.1	-1.20127	0.485076	1.39966	2.86108e-06	4.63743e-05	0.000344654
ENSG00000284543.1	-0.201011	-0.567027	0.675006	2.74415e-06	4.47249e-05	0.000344654	LINC01226
ENSG00000100504.16	8.41442	0.405128	1.32421	3.1241e-06	5.00209e-05	0.00034937	PYGL
ENSG00000106804.7	3.28835	0.292861	1.22507	3.0572e-06	4.91003e-05	0.00034937	C5
ENSG00000107249.21	0.95891	-0.604295	0.657793	3.11571e-06	4.99058e-05	0.00034937	GLIS3
ENSG00000108256.8	8.60834	0.151778	1.11094	3.092e-06	4.95799e-05	0.00034937	NUFIP2
ENSG00000119231.10	7.01192	-0.0835914	0.943705	3.10508e-06	4.97598e-05	0.00034937	SENP5
ENSG00000141753.6	1.09109	-0.517397	0.698631	3.13942e-06	5.0231e-05	0.00034937	IGFBP4
ENSG00000163516.13	6.57027	-0.152123	0.899925	3.13363e-06	5.01515e-05	0.00034937	ANKZF1
ENSG00000168060.15	3.02431	-0.374134	0.771569	3.15205e-06	5.04038e-05	0.00034937	NAALADL1
ENSG00000170522.9	3.10863	0.369469	1.29188	3.17466e-06	5.0713e-05	0.00034937	ELOVL6
ENSG00000204371.11	4.51333	-0.305187	0.809337	3.17721e-06	5.07477e-05	0.00034937	EHMT2
ENSG00000260807.6	1.56399	-0.661337	0.632292	3.14569e-06	5.03168e-05	0.00034937	CEROX1
ENSG00000106341.10	-0.618828	-0.623163	0.649246	3.18093e-06	5.07985e-05	0.000460159	PPP1R17
ENSG00000110917.7	6.44209	-0.164733	0.892094	3.22715e-06	5.14541e-05	0.000460159	MLEC
ENSG00000131473.16	6.83171	-0.245098	0.843759	3.21811e-06	5.1326e-05	0.000460159	ACLY
ENSG00000136807.13	5.71516	-0.204413	0.867892	3.20812e-06	5.11844e-05	0.000460159	CDK9
ENSG00000029364.11	6.56973	-0.0976848	0.934532	3.2752e-06	5.21348e-05	0.000470563	SLC39A9
ENSG00000070731.10	3.81685	-0.502486	0.705889	3.30235e-06	5.25187e-05	0.000470563	ST6GALNAC2
ENSG00000087253.12	7.16317	0.3346	1.26103	3.41514e-06	5.41062e-05	0.000470563	LPCAT2
ENSG00000090060.17	8.34246	0.161898	1.11876	3.5803e-06	5.64092e-05	0.000470563	PAPOLA
ENSG00000091483.6	4.59009	-0.18452	0.879942	3.32681e-06	5.28641e-05	0.000470563	FH
ENSG00000092094.10	5.50204	-0.144324	0.904803	3.56604e-06	5.62115e-05	0.000470563	OSGEP
ENSG00000093144.18	5.45262	0.260356	1.19777	3.37695e-06	5.35701e-05	0.000470563	ECHDC1
ENSG00000104660.17	6.69481	-0.183484	0.880574	3.61301e-06	5.68624e-05	0.000470563	LEPROTL1
ENSG00000111361.12	5.35042	-0.126586	0.915997	3.35634e-06	5.32801e-05	0.000470563	EIF2B1
ENSG00000115053.15	6.80907	-0.229667	0.852832	3.61618e-06	5.69061e-05	0.000470563	NCL
ENSG00000122861.15	0.490426	0.528605	1.44253	3.3574e-06	5.32951e-05	0.000470563	PLAU
ENSG00000134294.13	7.93188	0.213936	1.15985	3.24019e-06	5.16387e-05	0.000470563	SLC38A2
ENSG00000135709.12	7.17468	-0.354705	0.782029	3.48822e-06	5.51285e-05	0.000470563	KIAA0513
ENSG00000139117.13	4.37441	0.26817	1.20428	3.50036e-06	5.52978e-05	0.000470563	CPNE8
ENSG00000140563.14	8.47017	0.306364	1.23659	3.4693e-06	5.48643e-05	0.000470563	MCTP2
ENSG00000143786.7	2.34535	-0.392438	0.761841	3.57803e-06	5.63777e-05	0.000470563	CNIH3
ENSG00000152270.8	7.73539	-0.227778	0.853949	3.45987e-06	5.47325e-05	0.000470563	PDE3B
ENSG00000169446.5	4.96446	0.134741	1.0979	3.35235e-06	5.3224e-05	0.000470563	MMGT1
ENSG00000197747.8	5.22259	0.228973	1.172	3.61655e-06	5.69113e-05	0.000470563	S100A10
ENSG00000198270.12	4.87249	0.209655	1.15641	3.37812e-06	5.35865e-05	0.000470563	TMEM116
ENSG00000198898.13	6.83393	0.349918	1.27449	3.31821e-06	5.27427e-05	0.000470563	CAPZA2
ENSG00000211899.9	7.19635	-0.785724	0.580061	3.57191e-06	5.62929e-05	0.000470563	IGHM
ENSG00000226571.1	0.168998	-0.686423	0.621393	3.46352e-06	5.47835e-05	0.000470563
ENSG00000244045.12	4.85663	-0.121508	0.919226	3.61729e-06	5.69216e-05	0.000470563	TMEM199
ENSG00000244754.8	8.46281	0.178649	1.13182	3.43046e-06	5.43209e-05	0.000470563	N4BP2L2
ENSG00000010165.19	4.59697	-0.169508	0.889146	4.32272e-06	6.6521e-05	0.000491961	METTL13
ENSG00000057757.9	7.38526	0.622865	1.53993	4.50247e-06	6.88997e-05	0.000491961	PITHD1
ENSG00000058091.16	5.40629	0.336463	1.26266	3.61893e-06	5.69442e-05	0.000491961	CDK14
ENSG00000086232.12	7.68369	0.515812	1.4298	3.95332e-06	6.15476e-05	0.000491961	EIF2AK1
ENSG00000099783.11	6.45583	-0.160097	0.894965	4.40092e-06	6.75592e-05	0.000491961	HNRNPM
ENSG00000102753.9	4.89879	0.155951	1.11416	4.12337e-06	6.38514e-05	0.000491961	KPNA3
ENSG00000102786.14	7.66075	0.157248	1.11516	3.75897e-06	5.8884e-05	0.000491961	INTS6
ENSG00000102967.11	2.92821	-0.248266	0.841908	4.0586e-06	6.29769e-05	0.000491961	DHODH
ENSG00000105835.11	10.4859	0.436092	1.35293	3.92953e-06	6.12233e-05	0.000491961	NAMPT
ENSG00000110046.12	5.24099	-0.579585	0.669156	3.94204e-06	6.13939e-05	0.000491961	ATG2A
ENSG00000110076.18	-0.488055	-0.528244	0.693398	3.94945e-06	6.14949e-05	0.000491961	NRXN2
ENSG00000111832.12	3.74082	0.291058	1.22354	4.44617e-06	6.81575e-05	0.000491961	RWDD1
ENSG00000112414.14	0.395376	-0.515303	0.699646	3.85797e-06	6.02449e-05	0.000491961	ADGRG6
ENSG00000113318.9	4.95135	0.176412	1.13007	4.55048e-06	6.95305e-05	0.000491961	MSH3
ENSG00000117242.7	3.22386	-0.281972	0.822466	4.34572e-06	6.68269e-05	0.000491961	PINK1-AS
ENSG00000122692.8	6.54846	-0.103633	0.930687	4.13589e-06	6.402e-05	0.000491961	SMU1
ENSG00000123178.14	2.00677	0.24237	1.18293	3.96575e-06	6.17169e-05	0.000491961	SPRYD7
ENSG00000123570.3	0.521357	-0.398647	0.758569	4.54795e-06	6.94973e-05	0.000491961	RAB9B
ENSG00000123609.10	6.10392	0.287208	1.22028	4.40227e-06	6.7577e-05	0.000491961	NMI
ENSG00000131469.12	6.9964	0.402186	1.32151	4.42525e-06	6.78812e-05	0.000491961	RPL27
ENSG00000131747.14	2.4296	0.442366	1.35883	4.14609e-06	6.41573e-05	0.000491961	TOP2A
ENSG00000133985.2	3.90993	-0.347483	0.785954	4.42748e-06	6.79106e-05	0.000491961	TTC9
ENSG00000135763.9	4.48333	-0.195666	0.87317	4.19235e-06	6.47789e-05	0.000491961	URB2
ENSG00000136160.14	-1.57661	0.435889	1.35274	3.90074e-06	6.08302e-05	0.000491961	EDNRB
ENSG00000136999.4	3.55591	-0.50901	0.702704	4.23629e-06	6.53677e-05	0.000491961	CCN3
ENSG00000143164.15	6.40951	0.254491	1.19292	3.91032e-06	6.09611e-05	0.000491961	DCAF6
ENSG00000145920.14	-1.64154	-0.38301	0.766836	3.95265e-06	6.15385e-05	0.000491961	CPLX2
ENSG00000150625.16	0.402281	-0.855645	0.552618	4.21599e-06	6.50959e-05	0.000491961	GPM6A
ENSG00000157107.13	6.00027	0.313166	1.24243	4.00161e-06	6.22044e-05	0.000491961	FCHO2
ENSG00000157657.14	2.04473	-0.382808	0.766944	3.85392e-06	6.01894e-05	0.000491961	ZNF618
ENSG00000158246.7	-1.42103	-0.410503	0.752361	3.79462e-06	5.93751e-05	0.000491961	TENT5B
ENSG00000158473.6	5.51884	-0.293733	0.815789	4.58463e-06	6.99782e-05	0.000491961	CD1D
ENSG00000159674.11	4.93791	-0.527434	0.693788	4.23463e-06	6.53455e-05	0.000491961	SPON2
ENSG00000163660.11	8.39734	0.178467	1.13168	4.3258e-06	6.65619e-05	0.000491961	CCNL1
ENSG00000163788.13	8.33163	-0.17243	0.887347	4.5087e-06	6.89817e-05	0.000491961	SNRK
ENSG00000163935.13	4.57787	-0.243024	0.844972	4.5317e-06	6.9284e-05	0.000491961	SFMBT1
ENSG00000167670.15	2.88377	-0.253829	0.838668	4.32865e-06	6.65999e-05	0.000491961	CHAF1A
[truncated: 1,445 more rows]

## Sheet: f.Gene Overlap
Table S1f. Overlap in Differentially Expressed Genes (at FDR<.01) Across all 5 DNAm Clocks, by Gene Symbol
Combined gene list from all 5 DNAm clocks		Horvath	Hannum	PhenoAge	GrimAge	DunedinPACE
Gene	# of overlaps
PCDH9	4	PCDH9	PCDH9		PCDH9	PCDH9
ABCA13	4		ABCA13	ABCA13	ABCA13	ABCA13
ADGRA3	4		ADGRA3	ADGRA3	ADGRA3	ADGRA3
ARHGAP32	4		ARHGAP32	ARHGAP32	ARHGAP32	ARHGAP32
BACH2	4		BACH2	BACH2	BACH2	BACH2
BEX1	4		BEX1	BEX1	BEX1	BEX1
CAMP	4		CAMP	CAMP	CAMP	CAMP
COL17A1	4		COL17A1	COL17A1	COL17A1	COL17A1
DSC2	4		DSC2	DSC2	DSC2	DSC2
FAM43A	4		FAM43A	FAM43A	FAM43A	FAM43A
FBLN2	4		FBLN2	FBLN2	FBLN2	FBLN2
GCLM	4		GCLM	GCLM	GCLM	GCLM
HVCN1	4		HVCN1	HVCN1	HVCN1	HVCN1
LINC02009	4		LINC02009	LINC02009	LINC02009	LINC02009
LTF	4		LTF	LTF	LTF	LTF
LYPD2	4		LYPD2	LYPD2	LYPD2	LYPD2
MMP8	4		MMP8	MMP8	MMP8	MMP8
MSC-AS1	4		MSC-AS1	MSC-AS1	MSC-AS1	MSC-AS1
NRCAM	4		NRCAM	NRCAM	NRCAM	NRCAM
OLR1	4		OLR1	OLR1	OLR1	OLR1
P2RY10	4		P2RY10	P2RY10	P2RY10	P2RY10
PLD4	4		PLD4	PLD4	PLD4	PLD4
SERINC2	4		SERINC2	SERINC2	SERINC2	SERINC2
SH2D1B	4		SH2D1B	SH2D1B	SH2D1B	SH2D1B
ZNF135	4		ZNF135	ZNF135	ZNF135	ZNF135
LONRF3	3	LONRF3			LONRF3	LONRF3
MOB3B	3	MOB3B	MOB3B			MOB3B
PTK7	3	PTK7			PTK7	PTK7
PTPRK	3	PTPRK	PTPRK	PTPRK
AKAP6	3		AKAP6	AKAP6	AKAP6
ARK2C	3		ARK2C	ARK2C		ARK2C
BPI	3		BPI	BPI		BPI
CDKN1C	3		CDKN1C		CDKN1C	CDKN1C
CDKN2A	3		CDKN2A	CDKN2A		CDKN2A
CEACAM6	3		CEACAM6	CEACAM6		CEACAM6
CEACAM8	3		CEACAM8	CEACAM8		CEACAM8
CTSG	3		CTSG	CTSG		CTSG
DEFA4	3		DEFA4	DEFA4		DEFA4
DYNLT5	3		DYNLT5	DYNLT5		DYNLT5
ERG	3		ERG	ERG		ERG
HSPA4L	3		HSPA4L	HSPA4L		HSPA4L
HTRA3	3		HTRA3	HTRA3		HTRA3
INHBA	3		INHBA	INHBA		INHBA
ITGB1	3		ITGB1	ITGB1		ITGB1
PIWIL4-AS1	3		PIWIL4-AS1	PIWIL4-AS1		PIWIL4-AS1
RAP2A	3		RAP2A	RAP2A		RAP2A
SEPTIN8	3		SEPTIN8		SEPTIN8	SEPTIN8
SLC9A9-AS1	3		SLC9A9-AS1	SLC9A9-AS1		SLC9A9-AS1
TLE1	3		TLE1	TLE1		TLE1
TXK	3		TXK	TXK		TXK
ZNF439	3		ZNF439	ZNF439		ZNF439
ABCB1	3			ABCB1	ABCB1	ABCB1
ABTB3	3			ABTB3	ABTB3	ABTB3
ADAM9	3			ADAM9	ADAM9	ADAM9
AGAP7P	3			AGAP7P	AGAP7P	AGAP7P
AK4	3			AK4	AK4	AK4
AK5	3			AK5	AK5	AK5
ANKRD22	3			ANKRD22	ANKRD22	ANKRD22
ANKUB1	3			ANKUB1	ANKUB1	ANKUB1
ANOS1	3			ANOS1	ANOS1	ANOS1
ANXA3	3			ANXA3	ANXA3	ANXA3
ASPH	3			ASPH	ASPH	ASPH
BMAL2	3			BMAL2	BMAL2	BMAL2
C8orf88	3			C8orf88	C8orf88	C8orf88
CACNA1E	3			CACNA1E	CACNA1E	CACNA1E
CACNA2D3	3			CACNA2D3	CACNA2D3	CACNA2D3
CACNB4	3			CACNB4	CACNB4	CACNB4
CAPN13	3			CAPN13	CAPN13	CAPN13
CARD17P	3			CARD17P	CARD17P	CARD17P
CARD6	3			CARD6	CARD6	CARD6
CASP1	3			CASP1	CASP1	CASP1
CCDC71L	3			CCDC71L	CCDC71L	CCDC71L
CCR3	3			CCR3	CCR3	CCR3
CD274	3			CD274	CD274	CD274
CD36	3			CD36	CD36	CD36
CDC42EP3	3			CDC42EP3	CDC42EP3	CDC42EP3
CDKN2B	3			CDKN2B	CDKN2B	CDKN2B
CGAS	3			CGAS	CGAS	CGAS
CLEC5A	3			CLEC5A	CLEC5A	CLEC5A
CNIH4	3			CNIH4	CNIH4	CNIH4
COL13A1	3			COL13A1	COL13A1	COL13A1
CPOX	3			CPOX	CPOX	CPOX
CRISP3	3			CRISP3	CRISP3	CRISP3
CYSTM1	3			CYSTM1	CYSTM1	CYSTM1
DDX60L	3			DDX60L	DDX60L	DDX60L
DHRS3	3			DHRS3	DHRS3	DHRS3
DUSP3	3			DUSP3	DUSP3	DUSP3
ERCC6	3			ERCC6	ERCC6	ERCC6
EVC	3			EVC	EVC	EVC
F5	3			F5	F5	F5
FAM20A	3			FAM20A	FAM20A	FAM20A
FAM241A	3			FAM241A	FAM241A	FAM241A
FAT4	3			FAT4	FAT4	FAT4
FCGR1A	3			FCGR1A	FCGR1A	FCGR1A
FCGR1BP	3			FCGR1BP	FCGR1BP	FCGR1BP
FCGR1CP	3			FCGR1CP	FCGR1CP	FCGR1CP
GADD45A	3			GADD45A	GADD45A	GADD45A
GALNT14	3			GALNT14	GALNT14	GALNT14
GDF15	3			GDF15	GDF15	GDF15
GNG7	3			GNG7	GNG7	GNG7
GOLPH3L	3			GOLPH3L	GOLPH3L	GOLPH3L
GPR84	3			GPR84	GPR84	GPR84
GYG1	3			GYG1	GYG1	GYG1
H2BC6-AS1	3			H2BC6-AS1	H2BC6-AS1	H2BC6-AS1
HNRNPLL	3			HNRNPLL	HNRNPLL	HNRNPLL
HP	3			HP	HP	HP
IFI16	3			IFI16	IFI16	IFI16
IFI27	3			IFI27	IFI27	IFI27
IFI44	3			IFI44	IFI44	IFI44
JADE1	3			JADE1	JADE1	JADE1
JAK1	3			JAK1	JAK1	JAK1
KREMEN1	3			KREMEN1	KREMEN1	KREMEN1
LDHA	3			LDHA	LDHA	LDHA
LINC02289	3			LINC02289	LINC02289	LINC02289
LINC02915	3			LINC02915	LINC02915	LINC02915
LINC02967	3			LINC02967	LINC02967	LINC02967
LMNB1	3			LMNB1	LMNB1	LMNB1
LTA4H	3			LTA4H	LTA4H	LTA4H
MAOA	3			MAOA	MAOA	MAOA
MAP2K6	3			MAP2K6	MAP2K6	MAP2K6
MAP3K20	3			MAP3K20	MAP3K20	MAP3K20
MAP7	3			MAP7	MAP7	MAP7
MAPK14	3			MAPK14	MAPK14	MAPK14
MCEMP1	3			MCEMP1	MCEMP1	MCEMP1
MCOLN3	3			MCOLN3	MCOLN3	MCOLN3
METTL9	3			METTL9	METTL9	METTL9
MFHAS1	3			MFHAS1	MFHAS1	MFHAS1
MGAM2	3			MGAM2	MGAM2	MGAM2
MGST1	3			MGST1	MGST1	MGST1
MIR181A2HG	3			MIR181A2HG	MIR181A2HG	MIR181A2HG
MS4A4A	3			MS4A4A	MS4A4A	MS4A4A
MTHFD2	3			MTHFD2	MTHFD2	MTHFD2
MYO10	3			MYO10	MYO10	MYO10
NAIP	3			NAIP	NAIP	NAIP
NAIPP2	3			NAIPP2	NAIPP2	NAIPP2
NCOA7	3			NCOA7	NCOA7	NCOA7
NMRAL2P	3			NMRAL2P	NMRAL2P	NMRAL2P
NOG	3			NOG	NOG	NOG
NOL3	3			NOL3	NOL3	NOL3
NPDC1	3			NPDC1	NPDC1	NPDC1
NRG1	3			NRG1	NRG1	NRG1
PARP9	3			PARP9	PARP9	PARP9
PCMT1	3			PCMT1	PCMT1	PCMT1
PHF20	3			PHF20	PHF20	PHF20
PITPNC1	3			PITPNC1	PITPNC1	PITPNC1
PLSCR1	3			PLSCR1	PLSCR1	PLSCR1
PLSCR2	3			PLSCR2	PLSCR2	PLSCR2
PRDX1	3			PRDX1	PRDX1	PRDX1
PRSS35	3			PRSS35	PRSS35	PRSS35
PTGFR	3			PTGFR	PTGFR	PTGFR
RAB33B-AS1	3			RAB33B-AS1	RAB33B-AS1	RAB33B-AS1
RBFOX2	3			RBFOX2	RBFOX2	RBFOX2
RBM4B	3			RBM4B	RBM4B	RBM4B
RHOT1	3			RHOT1	RHOT1	RHOT1
RNASE2	3			RNASE2	RNASE2	RNASE2
RNF217	3			RNF217	RNF217	RNF217
RPGRIP1	3			RPGRIP1	RPGRIP1	RPGRIP1
S100A12	3			S100A12	S100A12	S100A12
S100A8	3			S100A8	S100A8	S100A8
SAMD9L	3			SAMD9L	SAMD9L	SAMD9L
SAMSN1	3			SAMSN1	SAMSN1	SAMSN1
SAP30	3			SAP30	SAP30	SAP30
SEPHS2	3			SEPHS2	SEPHS2	SEPHS2
SERPINB10	3			SERPINB10	SERPINB10	SERPINB10
SGMS1	3			SGMS1	SGMS1	SGMS1
SLC16A1	3			SLC16A1	SLC16A1	SLC16A1
SLC1A3	3			SLC1A3	SLC1A3	SLC1A3
SLC26A8	3			SLC26A8	SLC26A8	SLC26A8
SLC4A10	3			SLC4A10	SLC4A10	SLC4A10
SLC7A11	3			SLC7A11	SLC7A11	SLC7A11
SLPI	3			SLPI	SLPI	SLPI
SMARCD3	3			SMARCD3	SMARCD3	SMARCD3
SP100	3			SP100	SP100	SP100
SRD5A1	3			SRD5A1	SRD5A1	SRD5A1
SRPK1	3			SRPK1	SRPK1	SRPK1
SSBP2	3			SSBP2	SSBP2	SSBP2
TAB2	3			TAB2	TAB2	TAB2
TCTN1	3			TCTN1	TCTN1	TCTN1
TIFA	3			TIFA	TIFA	TIFA
TIGD3	3			TIGD3	TIGD3	TIGD3
TLR5	3			TLR5	TLR5	TLR5
TMEM165	3			TMEM165	TMEM165	TMEM165
TMEM178B	3			TMEM178B	TMEM178B	TMEM178B
TMEM200A	3			TMEM200A	TMEM200A	TMEM200A
TMTC2	3			TMTC2	TMTC2	TMTC2
TRIM69	3			TRIM69	TRIM69	TRIM69
TRPS1	3			TRPS1	TRPS1	TRPS1
TXN	3			TXN	TXN	TXN
WHAMMP2	3			WHAMMP2	WHAMMP2	WHAMMP2
XKRX	3			XKRX	XKRX	XKRX
ZC3HAV1	3			ZC3HAV1	ZC3HAV1	ZC3HAV1
ZCCHC14	3			ZCCHC14	ZCCHC14	ZCCHC14
ZKSCAN1	3			ZKSCAN1	ZKSCAN1	ZKSCAN1
ZMAT4	3			ZMAT4	ZMAT4	ZMAT4
ZNF211	3			ZNF211	ZNF211	ZNF211
ZNF438	3			ZNF438	ZNF438	ZNF438
ZNF462	3			ZNF462	ZNF462	ZNF462
ZNF542P	3			ZNF542P	ZNF542P	ZNF542P
ZNF595	3			ZNF595	ZNF595	ZNF595
BANK1	2	BANK1	BANK1
CCSER1	2	CCSER1	CCSER1
COL19A1	2	COL19A1	COL19A1
CTSF	2	CTSF				CTSF
EBF1	2	EBF1	EBF1
FAM177B	2	FAM177B	FAM177B
FAS	2	FAS				FAS
FCRL1	2	FCRL1	FCRL1
GOT1	2	GOT1				GOT1
HSPG2	2	HSPG2				HSPG2
IGHV1-24	2	IGHV1-24	IGHV1-24
IGHV1-46	2	IGHV1-46	IGHV1-46
IGHV3-21	2	IGHV3-21	IGHV3-21
KCNH8	2	KCNH8	KCNH8
KMO	2	KMO	KMO
LINC01800	2	LINC01800	LINC01800
LIX1-AS1	2	LIX1-AS1	LIX1-AS1
MEF2C	2	MEF2C	MEF2C
MFSD14B	2	MFSD14B				MFSD14B
MS4A1	2	MS4A1	MS4A1
MTND5P5	2	MTND5P5	MTND5P5
RASGEF1B	2	RASGEF1B	RASGEF1B
SCN3A	2	SCN3A	SCN3A
AFF3	2		AFF3			AFF3
CD248	2		CD248			CD248
CLEC17A	2		CLEC17A			CLEC17A
CRYBG2	2		CRYBG2			CRYBG2
GLDN	2		GLDN	GLDN
LINC01013	2		LINC01013		LINC01013
MPO	2		MPO	MPO
N4BP3	2		N4BP3			N4BP3
NIBAN3	2		NIBAN3			NIBAN3
NT5E	2		NT5E	NT5E
NUGGC	2		NUGGC			NUGGC
PMEPA1	2		PMEPA1	PMEPA1
PRCD	2		PRCD			PRCD
PTH2R	2		PTH2R	PTH2R
RHOU	2		RHOU			RHOU
SATB2	2		SATB2			SATB2
SYT17	2		SYT17		SYT17
TRIM60P17	2		TRIM60P17	TRIM60P17
TSPAN13	2		TSPAN13			TSPAN13
TSPAN3	2		TSPAN3			TSPAN3
ZNF667	2		ZNF667	ZNF667
ABCB10	2			ABCB10		ABCB10
ABCG2	2			ABCG2		ABCG2
ACER3	2			ACER3		ACER3
ACP1	2			ACP1		ACP1
ADAMTS1	2			ADAMTS1		ADAMTS1
AGFG1	2			AGFG1		AGFG1
AHSP	2			AHSP		AHSP
AJAP1	2			AJAP1		AJAP1
AMFR	2			AMFR		AMFR
ANKRD9	2			ANKRD9		ANKRD9
ANLN	2			ANLN		ANLN
AOC3	2			AOC3		AOC3
AP2B1	2			AP2B1		AP2B1
APBA2	2			APBA2		APBA2
ARL6IP1	2			ARL6IP1		ARL6IP1
ASPM	2			ASPM		ASPM
ATP5F1E	2			ATP5F1E		ATP5F1E
BARD1	2			BARD1		BARD1
BCL2L15	2			BCL2L15		BCL2L15
BPGM	2			BPGM		BPGM
C5	2			C5		C5
C5orf63	2			C5orf63		C5orf63
C6orf62	2			C6orf62		C6orf62
CA1	2			CA1		CA1
CCDC68	2			CCDC68		CCDC68
CCNDBP1	2			CCNDBP1		CCNDBP1
CD247	2			CD247		CD247
CD2AP	2			CD2AP		CD2AP
CD59	2			CD59		CD59
CDC27	2			CDC27		CDC27
CDCA7	2			CDCA7		CDCA7
CDK13	2			CDK13		CDK13
CDK14	2			CDK14		CDK14
CDK8	2			CDK8		CDK8
CDKN2B-AS1	2			CDKN2B-AS1		CDKN2B-AS1
CDYL2	2			CDYL2		CDYL2
CFAP58-DT	2			CFAP58-DT		CFAP58-DT
CHPT1	2			CHPT1		CHPT1
CIRBP	2			CIRBP		CIRBP
CISD2	2			CISD2		CISD2
CLIC2	2			CLIC2		CLIC2
CLIC3	2			CLIC3		CLIC3
CMAS	2			CMAS		CMAS
CREG1	2			CREG1		CREG1
CRISP2	2			CRISP2		CRISP2
CSDE1	2			CSDE1		CSDE1
CTNNAL1	2			CTNNAL1		CTNNAL1
CUX2	2			CUX2		CUX2
DCAF10	2			DCAF10		DCAF10
DCK	2			DCK		DCK
DCTN4	2			DCTN4		DCTN4
DDIAS	2			DDIAS		DDIAS
DEFA3	2			DEFA3		DEFA3
DGKK	2			DGKK		DGKK
DIAPH2	2			DIAPH2		DIAPH2
DNAJB5	2			DNAJB5		DNAJB5
DNASE1L3	2			DNASE1L3		DNASE1L3
DPY19L1	2			DPY19L1		DPY19L1
DRAM1	2			DRAM1		DRAM1
DYNLL1	2			DYNLL1		DYNLL1
EDAR	2			EDAR		EDAR
ELL2	2			ELL2		ELL2
EPS15	2			EPS15		EPS15
EPSTI1	2			EPSTI1	EPSTI1
ERFE	2			ERFE		ERFE
ERI1	2			ERI1		ERI1
EXPH5	2			EXPH5		EXPH5
EZH2	2			EZH2		EZH2
FAM20B	2			FAM20B		FAM20B
FAM83A	2			FAM83A		FAM83A
FEZ1	2			FEZ1		FEZ1
FFAR3	2			FFAR3		FFAR3
FZD5	2			FZD5		FZD5
GABARAPL2	2			GABARAPL2		GABARAPL2
GCLC	2			GCLC		GCLC
GHITM	2			GHITM		GHITM
GID4	2			GID4		GID4
GLIS3	2			GLIS3		GLIS3
GLRX5	2			GLRX5		GLRX5
GPA33	2			GPA33		GPA33
HBD	2			HBD		HBD
HK1	2			HK1		HK1
IFIT1B	2			IFIT1B		IFIT1B
IL10	2			IL10		IL10
KAT2B	2			KAT2B		KAT2B
KCNT2	2			KCNT2		KCNT2
KIT	2			KIT		KIT
KLF3-AS1	2			KLF3-AS1		KLF3-AS1
KLHL13	2			KLHL13		KLHL13
KLHL22	2			KLHL22		KLHL22
KLRF1	2			KLRF1		KLRF1
KRT72	2			KRT72		KRT72
LCN2	2			LCN2		LCN2
LEF1-AS1	2			LEF1-AS1		LEF1-AS1
LEPR	2			LEPR		LEPR
LEPROTL1	2			LEPROTL1		LEPROTL1
LHFPL2	2			LHFPL2		LHFPL2
LINC00494	2			LINC00494		LINC00494
LINC00865	2			LINC00865		LINC00865
LINGO2	2			LINGO2		LINGO2
LRRC2	2			LRRC2		LRRC2
MCTP1	2			MCTP1		MCTP1
MICOS10	2			MICOS10		MICOS10
MIR34AHG	2			MIR34AHG		MIR34AHG
MROCKI	2			MROCKI		MROCKI
MRPS15	2			MRPS15		MRPS15
MSMO1	2			MSMO1		MSMO1
NCEH1	2			NCEH1		NCEH1
NCR3LG1	2			NCR3LG1		NCR3LG1
NEDD4L	2			NEDD4L		NEDD4L
NOS1AP	2			NOS1AP		NOS1AP
NRIP3	2			NRIP3	NRIP3
NRN1	2			NRN1		NRN1
NUDT4	2			NUDT4		NUDT4
OLFM4	2			OLFM4		OLFM4
OXSR1	2			OXSR1		OXSR1
P2RX7	2			P2RX7		P2RX7
PA2G4	2			PA2G4		PA2G4
PAFAH2	2			PAFAH2		PAFAH2
PCGF5	2			PCGF5		PCGF5
PCOLCE2	2			PCOLCE2		PCOLCE2
PDCD1LG2	2			PDCD1LG2		PDCD1LG2	Overlapping genes in Bergsma & Rogeava 2020
PDE3B	2			PDE3B		PDE3B
PGF	2			PGF		PGF
PGM2L1	2			PGM2L1		PGM2L1
PIWIL4	2			PIWIL4		PIWIL4
PLSCR4	2			PLSCR4		PLSCR4
PLXDC1	2			PLXDC1		PLXDC1
PNP	2			PNP		PNP
POC1B	2			POC1B		POC1B
PODXL2	2			PODXL2		PODXL2
POLR1D	2			POLR1D		POLR1D
PPP1CB	2			PPP1CB		PPP1CB
PTPDC1	2			PTPDC1		PTPDC1
RAB13	2			RAB13		RAB13
RAB3IP	2			RAB3IP		RAB3IP
RBX1	2			RBX1		RBX1
RC3H2	2			RC3H2		RC3H2
REXO2	2			REXO2		REXO2
RHAG	2			RHAG		RHAG
RHCE	2			RHCE		RHCE
RNF14	2			RNF14		RNF14
RNF157-AS1	2			RNF157-AS1		RNF157-AS1
RPL22P4	2			RPL22P4		RPL22P4
SDC2	2			SDC2		SDC2
SEC62	2			SEC62		SEC62
SELENOP	2			SELENOP		SELENOP
SERPINF1	2			SERPINF1		SERPINF1
SIAH2	2			SIAH2		SIAH2
SLC16A10	2			SLC16A10		SLC16A10
SLC25A24	2			SLC25A24		SLC25A24
SLFN11	2			SLFN11		SLFN11
SNX3	2			SNX3		SNX3
SPIB	2			SPIB		SPIB
STOM	2			STOM		STOM
SUCNR1	2			SUCNR1		SUCNR1
TAB3	2			TAB3		TAB3
TBPL1	2			TBPL1		TBPL1
TCEA1	2			TCEA1		TCEA1
TCN1	2			TCN1		TCN1
TERF2IP	2			TERF2IP		TERF2IP
TFDP1	2			TFDP1		TFDP1
TFRC	2			TFRC		TFRC
THEM5	2			THEM5		THEM5
THOC7	2			THOC7		THOC7
TIMM23	2			TIMM23		TIMM23
TKTL1	2			TKTL1		TKTL1
TMEM14B	2			TMEM14B		TMEM14B
TMEM183A	2			TMEM183A		TMEM183A
TMEM220	2			TMEM220		TMEM220
TMEM9B	2			TMEM9B		TMEM9B
TMIGD2	2			TMIGD2		TMIGD2
TOP1	2			TOP1		TOP1
TOP2A	2			TOP2A		TOP2A
TPX2	2			TPX2		TPX2
TRHDE	2			TRHDE		TRHDE
TRHDE-AS1	2			TRHDE-AS1		TRHDE-AS1
TTL	2			TTL		TTL
UBE2E3	2			UBE2E3		UBE2E3
UBE2H	2			UBE2H		UBE2H
UGCG	2			UGCG		UGCG
UHMK1	2			UHMK1		UHMK1
USP43	2			USP43		USP43
VTI1B	2			VTI1B		VTI1B
WASF1	2			WASF1		WASF1
WDR26	2			WDR26		WDR26
WSB2	2			WSB2		WSB2
XK	2			XK		XK
ZBTB16	2			ZBTB16		ZBTB16
ZDHHC2	2			ZDHHC2		ZDHHC2
ZMAT2	2			ZMAT2		ZMAT2
ZNF154	2			ZNF154		ZNF154
ZNF160	2			ZNF160		ZNF160
ZNF274	2			ZNF274		ZNF274
ZNF417	2			ZNF417		ZNF417
ZNF550	2			ZNF550		ZNF550
ZNF671	2			ZNF671		ZNF671
ZNF727	2			ZNF727		ZNF727
ZNF814	2			ZNF814		ZNF814
ZNF835	2			ZNF835		ZNF835
ZSCAN18	2			ZSCAN18		ZSCAN18
ACSL6	2				ACSL6	ACSL6
ACVR1	2				ACVR1	ACVR1
ACVR2A	2				ACVR2A	ACVR2A
ADGRG6	2				ADGRG6	ADGRG6
ADM	2				ADM	ADM
AFF1	2				AFF1	AFF1
AHRR	2				AHRR	AHRR
AKAP12	2				AKAP12	AKAP12
ALDH1A1	2				ALDH1A1	ALDH1A1
ALDH6A1	2				ALDH6A1	ALDH6A1
ALDH9A1	2				ALDH9A1	ALDH9A1
ALPK2	2				ALPK2	ALPK2
AMACR	2				AMACR	AMACR
AMN1	2				AMN1	AMN1
ANAPC15	2				ANAPC15	ANAPC15
ANGPT1	2				ANGPT1	ANGPT1
ANK2	2				ANK2	ANK2
ANO5	2				ANO5	ANO5
ANXA1	2				ANXA1	ANXA1
AP1M2	2				AP1M2	AP1M2
APCDD1	2				APCDD1	APCDD1
ARG1	2				ARG1	ARG1
ARID5B	2				ARID5B	ARID5B
ARPP21	2				ARPP21	ARPP21
ASF1B	2				ASF1B	ASF1B
ASGR2	2				ASGR2	ASGR2
ATP11AUN	2				ATP11AUN	ATP11AUN
ATP11B	2				ATP11B	ATP11B
ATP13A3	2				ATP13A3	ATP13A3
ATP5MF	2				ATP5MF	ATP5MF
ATP5MG	2				ATP5MG	ATP5MG
ATP8B4	2				ATP8B4	ATP8B4
BAG4	2				BAG4	BAG4
BAIAP2	2				BAIAP2	BAIAP2
BAIAP2-DT	2				BAIAP2-DT	BAIAP2-DT
BASP1-AS1	2				BASP1-AS1	BASP1-AS1
BATF3	2				BATF3	BATF3
BCAS2P2	2				BCAS2P2	BCAS2P2
BEND2	2				BEND2	BEND2
C22orf39	2				C22orf39	C22orf39
CABP4	2				CABP4	CABP4
CACHD1	2				CACHD1	CACHD1
CAPN2	2				CAPN2	CAPN2
CARD16	2				CARD16	CARD16
CASC15	2				CASC15	CASC15
CASP9	2				CASP9	CASP9
CASS4	2				CASS4	CASS4
CAVIN2	2				CAVIN2	CAVIN2
CAVIN3	2				CAVIN3	CAVIN3
CC2D2B	2				CC2D2B	CC2D2B
CCDC141	2				CCDC141	CCDC141
CCR12P	2				CCR12P	CCR12P
CCR2	2				CCR2	CCR2
CCR8	2				CCR8	CCR8
CD177	2				CD177	CD177
CD1C	2				CD1C	CD1C
CD44	2				CD44	CD44
CD48	2				CD48	CD48
CD80	2				CD80	CD80
CD93	2				CD93	CD93
CDH13-AS2	2				CDH13-AS2	CDH13-AS2
CDH2	2				CDH2	CDH2
CDK6	2				CDK6	CDK6
CDKN2C	2				CDKN2C	CDKN2C
CHI3L1	2				CHI3L1	CHI3L1
CHIT1	2				CHIT1	CHIT1
CHMP5	2				CHMP5	CHMP5
CIAO2A	2				CIAO2A	CIAO2A
CIPC	2				CIPC	CIPC
CISH	2				CISH	CISH
CKB	2				CKB	CKB
CLDND1	2				CLDND1	CLDND1
CLEC4D	2				CLEC4D	CLEC4D
CLEC9A	2				CLEC9A	CLEC9A
CMAHP	2				CMAHP	CMAHP
CNEP1R1P1	2				CNEP1R1P1	CNEP1R1P1
CNIH3	2				CNIH3	CNIH3
COL14A1	2				COL14A1	COL14A1
COQ8A	2				COQ8A	COQ8A
COX7A2L	2				COX7A2L	COX7A2L
CPPED1	2				CPPED1	CPPED1
CROCC2	2				CROCC2	CROCC2
CSGALNACT1	2				CSGALNACT1	CSGALNACT1
CSGALNACT2	2				CSGALNACT2	CSGALNACT2
CSMD2	2				CSMD2	CSMD2
CSNK1A1	2				CSNK1A1	CSNK1A1
CTC-338M12.4	2				CTC-338M12.4	CTC-338M12.4
CTTN	2				CTTN	CTTN
CYP1B1	2				CYP1B1	CYP1B1
DAAM2	2				DAAM2	DAAM2
DCBLD2	2				DCBLD2	DCBLD2
DCSTAMP	2				DCSTAMP	DCSTAMP
DDX10P1	2				DDX10P1	DDX10P1
DDX28	2				DDX28	DDX28
DEGS1	2				DEGS1	DEGS1
DENND2C	2				DENND2C	DENND2C
DGKH	2				DGKH	DGKH
DISC1	2				DISC1	DISC1
DOCK4	2				DOCK4	DOCK4
DSCAS	2				DSCAS	DSCAS
DTNA	2				DTNA	DTNA
DTX4	2				DTX4	DTX4
DUXAP1	2				DUXAP1	DUXAP1
DYTN	2				DYTN	DYTN
EBF3	2				EBF3	EBF3
EDA	2				EDA	EDA
EEF1A1P14	2				EEF1A1P14	EEF1A1P14
EFCAB11	2				EFCAB11	EFCAB11
EIF2AK2	2				EIF2AK2	EIF2AK2
EIF4A3	2				EIF4A3	EIF4A3
EIF4E3	2				EIF4E3	EIF4E3
ELK3	2				ELK3	ELK3
EMB	2				EMB	EMB
FAM151B-DT	2				FAM151B-DT	FAM151B-DT
FAM168B	2				FAM168B	FAM168B
FAM53B	2				FAM53B	FAM53B
FANCD2	2				FANCD2	FANCD2
FANK1	2				FANK1	FANK1
FAP	2				FAP	FAP
FBN2	2				FBN2	FBN2
FBXL8	2				FBXL8	FBXL8
FBXO48	2				FBXO48	FBXO48
FLNB	2				FLNB	FLNB
FLVCR2	2				FLVCR2	FLVCR2
FOXP1-DT	2				FOXP1-DT	FOXP1-DT
GABRR2	2				GABRR2	GABRR2
GALNTL6	2				GALNTL6	GALNTL6
GASK1B	2				GASK1B	GASK1B
GATA2	2				GATA2	GATA2
GCSHP1	2				GCSHP1	GCSHP1
GEM	2				GEM	GEM
GLRX	2				GLRX	GLRX
GNAI1	2				GNAI1	GNAI1
GNAZ	2				GNAZ	GNAZ
GPM6A	2				GPM6A	GPM6A
GPR15	2				GPR15	GPR15
GPR155	2				GPR155	GPR155
GPR157	2				GPR157	GPR157
GPR162	2				GPR162	GPR162
GPR171	2				GPR171	GPR171
GRAMD1C	2				GRAMD1C	GRAMD1C
GREM2	2				GREM2	GREM2
GRHL1	2				GRHL1	GRHL1
GRIA1	2				GRIA1	GRIA1
GRK5	2				GRK5	GRK5
GSEC	2				GSEC	GSEC
GSTK1	2				GSTK1	GSTK1
HCAR2	2				HCAR2	HCAR2
HCAR3	2				HCAR3	HCAR3
HDAC4	2				HDAC4	HDAC4
HDC	2				HDC	HDC
HDGFL3	2				HDGFL3	HDGFL3
HELB	2				HELB	HELB
HGD	2				HGD	HGD
HINT1	2				HINT1	HINT1
HLA-DMB	2				HLA-DMB	HLA-DMB
HLA-DOA	2				HLA-DOA	HLA-DOA
HLA-DPA1	2				HLA-DPA1	HLA-DPA1
HLA-DPB1	2				HLA-DPB1	HLA-DPB1
HLA-DRB1	2				HLA-DRB1	HLA-DRB1
HLF	2				HLF	HLF
HMGB1P3	2				HMGB1P3	HMGB1P3
HMGB2	2				HMGB2	HMGB2
HORMAD1	2				HORMAD1	HORMAD1
HPRT1	2				HPRT1	HPRT1
HSF4	2				HSF4	HSF4
HTRA1	2				HTRA1	HTRA1
IFI44L	2				IFI44L	IFI44L
IFIH1	2				IFIH1	IFIH1
IFIT5	2				IFIT5	IFIT5
IGSF23	2				IGSF23	IGSF23
IL1RN	2				IL1RN	IL1RN
IL4	2				IL4	IL4
INAFM2	2				INAFM2	INAFM2
INSC	2				INSC	INSC
ITCH	2				ITCH	ITCH
ITGA1	2				ITGA1	ITGA1
ITGB8	2				ITGB8	ITGB8
JARID2	2				JARID2	JARID2
KAT7	2				KAT7	KAT7
KCNA2	2				KCNA2	KCNA2
KCND3	2				KCND3	KCND3
KCNMA1-AS1	2				KCNMA1-AS1	KCNMA1-AS1
KDSR	2				KDSR	KDSR
KIAA1958	2				KIAA1958	KIAA1958
KLHDC7A	2				KLHDC7A	KLHDC7A
KLHL29	2				KLHL29	KLHL29
LAMTOR5	2				LAMTOR5	LAMTOR5
LDLR	2				LDLR	LDLR
LGALS8	2				LGALS8	LGALS8
LILRA4	2				LILRA4	LILRA4
LINC00674	2				LINC00674	LINC00674
LINC00824	2				LINC00824	LINC00824
LINC01226	2				LINC01226	LINC01226
LINC01362	2				LINC01362	LINC01362
LINC01410	2				LINC01410	LINC01410
LINC02218	2				LINC02218	LINC02218
LINC02312	2				LINC02312	LINC02312
LINC02345	2				LINC02345	LINC02345
LINC02350	2				LINC02350	LINC02350
LINC02694	2				LINC02694	LINC02694
LINC02751	2				LINC02751	LINC02751
LPAR6	2				LPAR6	LPAR6
LRP1B	2				LRP1B	LRP1B
LRP2	2				LRP2	LRP2
LRP8	2				LRP8	LRP8
LSMEM1	2				LSMEM1	LSMEM1
LY96	2				LY96	LY96
LYNX1	2				LYNX1	LYNX1
MATCAP1	2				MATCAP1	MATCAP1
MB21D2	2				MB21D2	MB21D2
MCM5	2				MCM5	MCM5
MDFIC	2				MDFIC	MDFIC
MEF2A	2				MEF2A	MEF2A
MFAP3L	2				MFAP3L	MFAP3L
MGAT3	2				MGAT3	MGAT3
MGST3	2				MGST3	MGST3
MIAT	2				MIAT	MIAT
MIR124-1HG	2				MIR124-1HG	MIR124-1HG
MIR99AHG	2				MIR99AHG	MIR99AHG
MPP3	2				MPP3	MPP3
MPPED2	2				MPPED2	MPPED2
MPZL1	2				MPZL1	MPZL1
MSL3	2				MSL3	MSL3
MT-ND6	2				MT-ND6	MT-ND6
MT-RNR2	2				MT-RNR2	MT-RNR2
MUC1	2				MUC1	MUC1
MYD88	2				MYD88	MYD88
MYLK	2				MYLK	MYLK
NAALAD2	2				NAALAD2	NAALAD2
NAALADL2	2				NAALADL2	NAALADL2
NDRG2	2				NDRG2	NDRG2
NDUFB3	2				NDUFB3	NDUFB3
NEFL	2				NEFL	NEFL
NEURL1	2				NEURL1	NEURL1
NFE2L2	2				NFE2L2	NFE2L2
NRIR	2				NRIR	NRIR
NRXN2	2				NRXN2	NRXN2
NSMAF	2				NSMAF	NSMAF
NUP93	2				NUP93	NUP93
OMG	2				OMG	OMG
PAG1	2				PAG1	PAG1
PAQR7	2				PAQR7	PAQR7
PDE8B	2				PDE8B	PDE8B
PDSS1	2				PDSS1	PDSS1
PECR	2				PECR	PECR
PF4	2				PF4	PF4
PGAP1	2				PGAP1	PGAP1
PHF11	2				PHF11	PHF11
PHF2P2	2				PHF2P2	PHF2P2
PHTF1	2				PHTF1	PHTF1
PLEKHO1	2				PLEKHO1	PLEKHO1
PPARG	2				PPARG	PPARG
PPP1R17	2				PPP1R17	PPP1R17
PPP1R3G	2				PPP1R3G	PPP1R3G
PRDM1	2				PRDM1	PRDM1
PRPF4	2				PRPF4	PRPF4
PSMA6	2				PSMA6	PSMA6
PTGER2	2				PTGER2	PTGER2
PTP4A2P2	2				PTP4A2P2	PTP4A2P2
PTPRG	2				PTPRG	PTPRG
PTPRN2-AS1	2				PTPRN2-AS1	PTPRN2-AS1
PXK	2				PXK	PXK
RAB9B	2				RAB9B	RAB9B
RABGAP1L	2				RABGAP1L	RABGAP1L
RCSD1	2				RCSD1	RCSD1
RGL1	2				RGL1	RGL1
RIDA	2				RIDA	RIDA
RIGI	2				RIGI	RIGI
RN7SKP97	2				RN7SKP97	RN7SKP97
RN7SL834P	2				RN7SL834P	RN7SL834P
RNASE1	2				RNASE1	RNASE1
ROR1	2				ROR1	ROR1
RPL17P28	2				RPL17P28	RPL17P28
RPL38P4	2				RPL38P4	RPL38P4
RPS23P9	2				RPS23P9	RPS23P9
RTCA	2				RTCA	RTCA
RTKN2	2				RTKN2	RTKN2
S100A10	2				S100A10	S100A10
S100A9	2				S100A9	S100A9
SASH1	2				SASH1	SASH1
SCARA5	2				SCARA5	SCARA5
SCART1	2				SCART1	SCART1
SCRN1	2				SCRN1	SCRN1
SDHAF3	2				SDHAF3	SDHAF3
SEC24A	2				SEC24A	SEC24A
SEMA6B	2				SEMA6B	SEMA6B
SERPINE2	2				SERPINE2	SERPINE2
SETD7	2				SETD7	SETD7
SETX	2				SETX	SETX
SEZ6L	2				SEZ6L	SEZ6L
SGK1	2				SGK1	SGK1
SH3BP4	2				SH3BP4	SH3BP4
SH3GLB1	2				SH3GLB1	SH3GLB1
SH3RF3	2				SH3RF3	SH3RF3
SHISA4	2				SHISA4	SHISA4
SLBP	2				SLBP	SLBP
SLC22A4	2				SLC22A4	SLC22A4
SLC37A3	2				SLC37A3	SLC37A3
SLC39A8	2				SLC39A8	SLC39A8
SLC44A1	2				SLC44A1	SLC44A1
SLC4A3	2				SLC4A3	SLC4A3
SLC51A	2				SLC51A	SLC51A
SLC7A1	2				SLC7A1	SLC7A1
SLITRK4	2				SLITRK4	SLITRK4
SMARCA1	2				SMARCA1	SMARCA1
SNIP1	2				SNIP1	SNIP1
SNN	2				SNN	SNN
SNX9	2				SNX9	SNX9
SOCS2	2				SOCS2	SOCS2
SOCS3	2				SOCS3	SOCS3
SOS1	2				SOS1	SOS1
SPATA20P1	2				SPATA20P1	SPATA20P1
SPTLC3	2				SPTLC3	SPTLC3
STX2	2				STX2	STX2
SUMO3	2				SUMO3	SUMO3
SYTL5	2				SYTL5	SYTL5
TAGLN	2				TAGLN	TAGLN
TBC1D12	2				TBC1D12	TBC1D12
TBC1D30	2				TBC1D30	TBC1D30
TCF20	2				TCF20	TCF20
TEK	2				TEK	TEK
TENM1	2				TENM1	TENM1
THSD7A	2				THSD7A	THSD7A
TIFAB	2				TIFAB	TIFAB
TLR10	2				TLR10	TLR10
TMCC1-DT	2				TMCC1-DT	TMCC1-DT
TMEM107	2				TMEM107	TMEM107
TMEM116	2				TMEM116	TMEM116
TMEM132B	2				TMEM132B	TMEM132B
TMEM260	2				TMEM260	TMEM260
TMEM45B	2				TMEM45B	TMEM45B
TNFAIP6	2				TNFAIP6	TNFAIP6
TNFRSF8	2				TNFRSF8	TNFRSF8
TNFSF13B	2				TNFSF13B	TNFSF13B
TNFSF8	2				TNFSF8	TNFSF8
TNNT1	2				TNNT1	TNNT1
TP53INP2	2				TP53INP2	TP53INP2
TPPP3	2				TPPP3	TPPP3
TRGC1	2				TRGC1	TRGC1
TRIM22	2				TRIM22	TRIM22
TRIM25	2				TRIM25	TRIM25
TRIM6	2				TRIM6	TRIM6
TRMT9B	2				TRMT9B	TRMT9B
TSPEAR	2				TSPEAR	TSPEAR
TTC28	2				TTC28	TTC28
TTC39C	2				TTC39C	TTC39C
TTF1	2				TTF1	TTF1
TTN	2				TTN	TTN
TTN-AS1	2				TTN-AS1	TTN-AS1
UACA	2				UACA	UACA
UBE2J1	2				UBE2J1	UBE2J1
UICLM	2				UICLM	UICLM
UPP1	2				UPP1	UPP1
USP46	2				USP46	USP46
UTP6	2				UTP6	UTP6
VCAN	2				VCAN	VCAN
VIL1	2				VIL1	VIL1
VIPR2	2				VIPR2	VIPR2
VNN1	2				VNN1	VNN1
VPS41	2				VPS41	VPS41
WDR11-DT	2				WDR11-DT	WDR11-DT
WDR45B	2				WDR45B	WDR45B
WDR82	2				WDR82	WDR82
ZBTB7C	2				ZBTB7C	ZBTB7C
ZDHHC1	2				ZDHHC1	ZDHHC1
ZFP36L1	2				ZFP36L1	ZFP36L1
ZNF185	2				ZNF185	ZNF185
ZNF521	2				ZNF521	ZNF521
ZNF740	2				ZNF740	ZNF740
ZNF763	2				ZNF763	ZNF763
ZNG1C	2				ZNG1C	ZNG1C
ABCF2	1	ABCF2
ADAM7-AS1	1	ADAM7-AS1
ATP2B1	1	ATP2B1
BCR	1	BCR
DECR1	1	DECR1
GNB4	1	GNB4
IGFBP2	1	IGFBP2
IGKV1-8	1	IGKV1-8
ITSN2	1	ITSN2
LINC00899	1	LINC00899
MAP3K8	1	MAP3K8
MEF2C-AS1	1	MEF2C-AS1
MYCN	1	MYCN
PFKM	1	PFKM
PROCR	1	PROCR
REL	1	REL
RMDN3	1	RMDN3
SAMD4A	1	SAMD4A
STEAP1B	1	STEAP1B
TMOD2	1	TMOD2
UBXN10	1	UBXN10
ABCB4	1		ABCB4
AZU1	1		AZU1
BCL7A	1		BCL7A
BGLT3	1		BGLT3
BLNK	1		BLNK
C12orf42	1		C12orf42
C2CD4D-AS1	1		C2CD4D-AS1
CACNB3	1		CACNB3
CD19	1		CD19
CD22	1		CD22
CD72	1		CD72
CD79B	1		CD79B
CDC14B	1		CDC14B
CFH	1		CFH
CNKSR2	1		CNKSR2
CORO2B	1		CORO2B
CR2	1		CR2
CRNDE	1		CRNDE
EFNA5	1		EFNA5
EIF2AK3	1		EIF2AK3
EPB41L2	1		EPB41L2
FAAHP1	1		FAAHP1
HAVCR2	1		HAVCR2
HES1	1		HES1
HS3ST1	1		HS3ST1
IGHV3-15	1		IGHV3-15
IGHV3-23	1		IGHV3-23
IGHV3-30	1		IGHV3-30
IGHV4-34	1		IGHV4-34
IGHV5-51	1		IGHV5-51
IGLL5	1		IGLL5
KLHL14	1		KLHL14
L3MBTL4	1		L3MBTL4
LARGE1	1		LARGE1
LINC02202	1		LINC02202
LINC02397	1		LINC02397
MIR181A1HG	1		MIR181A1HG
NREP	1		NREP
PATL2	1		PATL2
PRICKLE1	1		PRICKLE1
PRSS16	1		PRSS16
PTPN22	1		PTPN22
PTPRK-AS1	1		PTPRK-AS1
RPS20P23	1		RPS20P23
SERPINB9P1	1		SERPINB9P1
SLC35G2	1		SLC35G2
SNX22	1		SNX22
SPAG6	1		SPAG6
SPRY1	1		SPRY1
STK33	1		STK33
STXBP6	1		STXBP6
TUBA5P	1		TUBA5P
VPREB3	1		VPREB3
ZBTB38	1		ZBTB38
AIM2	1			AIM2
APOL4	1			APOL4
ASH2L	1			ASH2L
ATG14	1			ATG14
BCAM	1			BCAM
C3AR1	1			C3AR1
CCRL2	1			CCRL2
CDC6	1			CDC6
CDH6	1			CDH6
CIT	1			CIT
CLBA1	1			CLBA1
CRYM	1			CRYM
DPCD	1			DPCD
E2F1	1			E2F1
EFHC2	1			EFHC2
ENDOD1	1			ENDOD1
FANCI	1			FANCI
FGF2	1			FGF2
FHDC1	1			FHDC1
FOXQ1	1			FOXQ1
FRMD3	1			FRMD3
GBP1	1			GBP1
GBP1P1	1			GBP1P1
GCH1	1			GCH1
GRAMD2B	1			GRAMD2B
HEXIM1	1			HEXIM1
KNL1	1			KNL1
LINC02489	1			LINC02489
LINC03049	1			LINC03049
MKRN3	1			MKRN3
MMP1	1			MMP1
MMP28	1			MMP28
NARF-AS1	1			NARF-AS1
NETO2	1			NETO2
POLQ	1			POLQ
PTTG1	1			PTTG1
RAD23BP1	1			RAD23BP1
RASGRF2	1			RASGRF2
RIPOR3	1			RIPOR3
RPL7P24	1			RPL7P24
SATB1	1			SATB1
SATB1-AS1	1			SATB1-AS1
SGPP2	1			SGPP2
SPIC	1			SPIC
TMCC2	1			TMCC2
TNPO1P2	1			TNPO1P2
TPM1	1			TPM1
TSPAN17	1			TSPAN17
TSPYL5	1			TSPYL5
UBE2C	1			UBE2C
UROD	1			UROD
VN1R83P	1			VN1R83P
YWHAH	1			YWHAH
ZNF677	1			ZNF677
ADAM23	1				ADAM23
ADAMDEC1	1				ADAMDEC1
ADNP2	1				ADNP2
ADRA2A	1				ADRA2A
ANKRD18B	1				ANKRD18B
APLNR	1				APLNR
ARHGAP24	1				ARHGAP24
ARMC3	1				ARMC3
ATP1A2	1				ATP1A2
B3GALT2	1				B3GALT2
BIVM	1				BIVM
BPIFB6	1				BPIFB6
C4orf36	1				C4orf36
CCDC187	1				CCDC187
CCR4	1				CCR4
CCR9	1				CCR9
CFAP161	1				CFAP161
CHI3L2	1				CHI3L2
CHRNA4	1				CHRNA4
CHROMR	1				CHROMR
CMPK2	1				CMPK2
COCH	1				COCH
CORO2A	1				CORO2A
CTNND2	1				CTNND2
CTTNBP2	1				CTTNBP2
CYP51A1P3	1				CYP51A1P3
DACH2	1				DACH2
DACT2	1				DACT2
DDX60	1				DDX60
DNM3	1				DNM3
EDN3	1				EDN3
EGLN3	1				EGLN3
EPIC1	1				EPIC1
FAM117B	1				FAM117B
FAXDC2	1				FAXDC2
FBXO39	1				FBXO39
FMO2	1				FMO2
FOXD3	1				FOXD3
FOXP3	1				FOXP3
FPR3	1				FPR3
FSTL1	1				FSTL1
GALM	1				GALM
GPR25	1				GPR25
GPR55	1				GPR55
GRASLND	1				GRASLND
GUCY1A1	1				GUCY1A1
HERC5	1				HERC5
HERC6	1				HERC6
HNRNPA1P21	1				HNRNPA1P21
HRH1	1				HRH1
HSD3B7	1				HSD3B7
IFI6	1				IFI6
IFIT1	1				IFIT1
IGHA2	1				IGHA2
IGHE	1				IGHE
IGLV6-57	1				IGLV6-57
IGSF9B	1				IGSF9B
IL2RA	1				IL2RA
IL32	1				IL32
IL9R	1				IL9R
ILDR1	1				ILDR1
IMPG1	1				IMPG1
JCHAIN	1				JCHAIN
KCNJ6	1				KCNJ6
KIF26B	1				KIF26B
KLHDC7B	1				KLHDC7B
LAMA2	1				LAMA2
LINC00426	1				LINC00426
LINC00487	1				LINC00487
LRRC37A7P	1				LRRC37A7P
LRRN3	1				LRRN3
LUNAR1	1				LUNAR1
MINAR1	1				MINAR1
MT-RNR1	1				MT-RNR1
MTARC2	1				MTARC2
MX1	1				MX1
NBEA	1				NBEA
NDUFA12	1				NDUFA12
NINJ2	1				NINJ2
NRP1	1				NRP1
NT5DC2	1				NT5DC2
OAS2	1				OAS2
OAS3	1				OAS3
P2RX4	1				P2RX4
P2RY6	1				P2RY6
PABPC1P6	1				PABPC1P6
PALLD	1				PALLD
PDE3A	1				PDE3A
PDE4D	1				PDE4D
PDE5A	1				PDE5A
PDE6C	1				PDE6C
PDGFA-DT	1				PDGFA-DT
PID1	1				PID1
PLXNA4	1				PLXNA4
PRTG	1				PRTG
PTGFRN	1				PTGFRN
PVT1	1				PVT1
RAB27B	1				RAB27B
RPL22P5	1				RPL22P5
RPS7P1	1				RPS7P1
RSAD2	1				RSAD2
SEMA3G	1				SEMA3G
SH2D4A	1				SH2D4A
SI	1				SI
SIGLEC1	1				SIGLEC1
SLC6A4	1				SLC6A4
ST6GALNAC1	1				ST6GALNAC1
ST6GALNAC5	1				ST6GALNAC5
STAB1	1				STAB1
STXBP1	1				STXBP1
SUSD4	1				SUSD4
TLL1	1				TLL1
TMEM123	1				TMEM123
TMEM78	1				TMEM78
TMPRSS11E	1				TMPRSS11E
UPK1A-AS1	1				UPK1A-AS1
USP18	1				USP18
VAMP8	1				VAMP8
WHAMMP3	1				WHAMMP3
XAF1	1				XAF1
ZCCHC2	1				ZCCHC2
ZNF233	1				ZNF233
AACS	1					AACS
AAMP	1					AAMP
AATF	1					AATF
ABAT	1					ABAT
ABCA1	1					ABCA1
ABCA6	1					ABCA6
ABCC13	1					ABCC13
ABCC4	1					ABCC4
ABCF3	1					ABCF3
ABCG1	1					ABCG1
ABHD13	1					ABHD13
ABHD15	1					ABHD15
ABHD2	1					ABHD2
ABHD4	1					ABHD4
ABHD5	1					ABHD5
ABHD6	1					ABHD6
ABLIM1	1					ABLIM1
ABT1	1					ABT1
ACACB	1					ACACB
ACAD8	1					ACAD8
ACAD9	1					ACAD9
ACAT1	1					ACAT1
ACHE	1					ACHE
ACKR3	1					ACKR3
ACLY	1					ACLY
ACSF2	1					ACSF2
ACSL1	1					ACSL1
ACSL4	1					ACSL4
ACSM5	1					ACSM5
ACSS1	1					ACSS1
ACTN4	1					ACTN4
ACTR10	1					ACTR10
ACTR5	1					ACTR5
ACTR8	1					ACTR8
ADAM10	1					ADAM10
ADAM11	1					ADAM11
ADAM17	1					ADAM17
ADAM28	1					ADAM28
ADAM32	1					ADAM32
ADAMTS7P1	1					ADAMTS7P1
ADAMTSL2	1					ADAMTSL2
ADCK1	1					ADCK1
ADCY6	1					ADCY6
ADGRE2	1					ADGRE2
ADGRE4P	1					ADGRE4P
ADI1	1					ADI1
ADIPOR1P2	1					ADIPOR1P2
ADM-DT	1					ADM-DT
ADNP	1					ADNP
ADORA1	1					ADORA1
ADORA2B	1					ADORA2B
ADPRS	1					ADPRS
ADRB1	1					ADRB1
AEBP1	1					AEBP1
AFG3L2	1					AFG3L2
AGTPBP1	1					AGTPBP1
AHCYL1	1					AHCYL1
AHSA1	1					AHSA1
AIDA	1					AIDA
AIDAP2	1					AIDAP2
AIMP2	1					AIMP2
AK2	1					AK2
AKAP17A	1					AKAP17A
AKAP5	1					AKAP5
AKAP8	1					AKAP8
AKIRIN2	1					AKIRIN2
AKR1B1	1					AKR1B1
AKT1	1					AKT1
ALAS2	1					ALAS2
ALDH1A2	1					ALDH1A2
ALDH1B1	1					ALDH1B1
ALDH1L1	1					ALDH1L1
ALDH3A2	1					ALDH3A2
ALG1	1					ALG1
ALG1L13P	1					ALG1L13P
ALG2	1					ALG2
ALKBH1	1					ALKBH1
ALOX15B	1					ALOX15B
ALPK1	1					ALPK1
ALPL	1					ALPL
ALYREF	1					ALYREF
AMD1	1					AMD1
AMER2	1					AMER2
AMMECR1	1					AMMECR1
AMN	1					AMN
AMPD2	1					AMPD2
AMPD3	1					AMPD3
AMPH	1					AMPH
ANAPC5	1					ANAPC5
ANAPC7	1					ANAPC7
ANGPTL6	1					ANGPTL6
ANK3	1					ANK3
ANKRD34B	1					ANKRD34B
ANKRD50	1					ANKRD50
ANKRD6	1					ANKRD6
ANKZF1	1					ANKZF1
ANO10	1					ANO10
ANP32B	1					ANP32B
ANXA4	1					ANXA4
AOC2	1					AOC2
AP1M1	1					AP1M1
AP3S1	1					AP3S1
APBA1	1					APBA1
APBB1	1					APBB1
APH1A	1					APH1A
APLF	1					APLF
APOD	1					APOD
APOOL	1					APOOL
AQP9	1					AQP9
ARCN1	1					ARCN1
ARF4-AS1	1					ARF4-AS1
ARFGAP2	1					ARFGAP2
ARG2	1					ARG2
ARHGAP10	1					ARHGAP10
ARHGAP11A	1					ARHGAP11A
ARHGAP15	1					ARHGAP15
ARHGAP20	1					ARHGAP20
ARHGAP25	1					ARHGAP25
ARHGAP44	1					ARHGAP44
ARHGEF18	1					ARHGEF18
ARHGEF37	1					ARHGEF37
ARHGEF4	1					ARHGEF4
ARIH2	1					ARIH2
ARL3	1					ARL3
ARL6IP5	1					ARL6IP5
ARMC9	1					ARMC9
ARMCX2	1					ARMCX2
ARMH2	1					ARMH2
ARRB1	1					ARRB1
ARRDC3	1					ARRDC3
ARRDC5	1					ARRDC5
ARSJ	1					ARSJ
ASAP1	1					ASAP1
ASAP1-IT2	1					ASAP1-IT2
ASB7	1					ASB7
ASL	1					ASL
ASTL	1					ASTL
ASXL2	1					ASXL2
ATAD2B	1					ATAD2B
ATAD3C	1					ATAD3C
ATF6	1					ATF6
ATG16L1	1					ATG16L1
ATG2A	1					ATG2A
ATG3	1					ATG3
ATL3	1					ATL3
ATP10D	1					ATP10D
ATP2B4	1					ATP2B4
ATP5F1A	1					ATP5F1A
ATP5F1C	1					ATP5F1C
ATP5IF1	1					ATP5IF1
ATP5MC2	1					ATP5MC2
ATP5MJ	1					ATP5MJ
ATP5MK	1					ATP5MK
ATP5PF	1					ATP5PF
ATP6V0A2	1					ATP6V0A2
ATP6V1C1	1					ATP6V1C1
ATP6V1D	1					ATP6V1D
ATP6V1G1	1					ATP6V1G1
ATP7B	1					ATP7B
ATP8A2	1					ATP8A2
ATXN1	1					ATXN1
AZI2	1					AZI2
B2M	1					B2M
B3GALT6	1					B3GALT6
B3GNT2	1					B3GNT2
B3GNT5	1					B3GNT5
B3GNT7	1					B3GNT7
B9D1	1					B9D1
BAALC	1					BAALC
BACE2	1					BACE2
BACE2-IT1	1					BACE2-IT1
BACH1-IT1	1					BACH1-IT1
BAIAP3	1					BAIAP3
BANP	1					BANP
BATF	1					BATF
BAZ1B	1					BAZ1B
BBOF1	1					BBOF1
BBS2	1					BBS2
BBS5	1					BBS5
BCAP31	1					BCAP31
BCAR3	1					BCAR3
BCAS4	1					BCAS4
BCL2A1	1					BCL2A1
BCL6	1					BCL6
BCLAF3	1					BCLAF3
BCOR	1					BCOR
BCRP5	1					BCRP5
BCS1L	1					BCS1L
BDNF	1					BDNF
BEND7	1					BEND7
BEX4	1					BEX4
BFSP2-AS1	1					BFSP2-AS1
BIRC2	1					BIRC2
BLK	1					BLK
BLOC1S2	1					BLOC1S2
BLOC1S6	1					BLOC1S6
BLTP2	1					BLTP2
BLVRA	1					BLVRA
BLZF2P	1					BLZF2P
BMP2K	1					BMP2K
BMPR2	1					BMPR2
BMX	1					BMX
BNC2	1					BNC2
BPNT2	1					BPNT2
BRI3BP	1					BRI3BP
BRME1	1					BRME1
BST1	1					BST1
BTBD6P1	1					BTBD6P1
BTBD9	1					BTBD9
BTD	1					BTD
BTF3	1					BTF3
BTK	1					BTK
BUB1	1					BUB1
BUD13	1					BUD13
BUD23	1					BUD23
C10orf95-AS1	1					C10orf95-AS1
C16orf54	1					C16orf54
C18orf54	1					C18orf54
C19orf48P	1					C19orf48P
C1GALT1	1					C1GALT1
C1GALT1C1	1					C1GALT1C1
C1orf174	1					C1orf174
C1orf43	1					C1orf43
C1QB	1					C1QB
C2CD4C	1					C2CD4C
C2orf68	1					C2orf68
C2orf69	1					C2orf69
C3	1					C3
C4orf3	1					C4orf3
C5orf47	1					C5orf47
C5orf64	1					C5orf64
C5orf67	1					C5orf67
C6orf47	1					C6orf47
C6orf89	1					C6orf89
C8orf33	1					C8orf33
C8orf82	1					C8orf82
C9orf40	1					C9orf40
C9orf72	1					C9orf72
C9orf78	1					C9orf78
CA3-AS1	1					CA3-AS1
CA4	1					CA4
CA8	1					CA8
CABIN1	1					CABIN1
CABLES1	1					CABLES1
CACFD1	1					CACFD1
CACNA1D	1					CACNA1D
CACNB2	1					CACNB2
CACNG6	1					CACNG6
CACTIN-AS1	1					CACTIN-AS1
CALCOCO1	1					CALCOCO1
CALCRL	1					CALCRL
CAMK1	1					CAMK1
CAMK1D	1					CAMK1D
CAMKMT	1					CAMKMT
CAND2	1					CAND2
CANX	1					CANX
CAPN1-AS1	1					CAPN1-AS1
CAPN9	1					CAPN9
CAPZA1	1					CAPZA1
CAPZA2	1					CAPZA2
CARD8	1					CARD8
CARMIL1	1					CARMIL1
CASP4	1					CASP4
CASP5	1					CASP5
CAST	1					CAST
CBX1	1					CBX1
CBX7	1					CBX7
CBX8	1					CBX8
CCDC115	1					CCDC115
CCDC125	1					CCDC125
CCDC126	1					CCDC126
CCDC13-AS2	1					CCDC13-AS2
CCDC142	1					CCDC142
CCDC7	1					CCDC7
CCHCR1	1					CCHCR1
CCN3	1					CCN3
CCNA2	1					CCNA2
CCND3	1					CCND3
CCNE2	1					CCNE2
CCNI	1					CCNI
CCNL1	1					CCNL1
CCNL2	1					CCNL2
CCNYL1	1					CCNYL1
CCPG1	1					CCPG1
CCR7	1					CCR7
CCT3	1					CCT3
CCT7	1					CCT7
CD164	1					CD164
CD177P1	1					CD177P1
CD1D	1					CD1D
CD2	1					CD2
CD200R1L	1					CD200R1L
CD27	1					CD27
CD300E	1					CD300E
CD300LB	1					CD300LB
CD300LF	1					CD300LF
CD3G	1					CD3G
CD52	1					CD52
CD58	1					CD58
CD74	1					CD74
CD99P1	1					CD99P1
CDADC1	1					CDADC1
CDAN1	1					CDAN1
CDC14A	1					CDC14A
CDC23	1					CDC23
CDC42BPA	1					CDC42BPA
CDC42EP2	1					CDC42EP2
CDC42SE1	1					CDC42SE1
CDH23	1					CDH23
CDH24	1					CDH24
CDIP1	1					CDIP1
CDK1	1					CDK1
CDK15	1					CDK15
CDK5RAP1	1					CDK5RAP1
CDK5RAP3	1					CDK5RAP3
CDK9	1					CDK9
CDKN3	1					CDKN3
CEBPZOS	1					CEBPZOS
CELSR1	1					CELSR1
CENPJ	1					CENPJ
CEP135	1					CEP135
CEP41	1					CEP41
CEP72	1					CEP72
CEROX1	1					CEROX1
CERS2	1					CERS2
CFAP20	1					CFAP20
CFAP58	1					CFAP58
CFAP61	1					CFAP61
CGRRF1	1					CGRRF1
CHAC2	1					CHAC2
CHAF1A	1					CHAF1A
CHD6	1					CHD6
CHKA	1					CHKA
CHMP7	1					CHMP7
CHRDL1	1					CHRDL1
CHST10	1					CHST10
CHST7	1					CHST7
CHTF18	1					CHTF18
CHTF8	1					CHTF8
CHURC1	1					CHURC1
CIAO1	1					CIAO1
CIAPIN1	1					CIAPIN1
CILK1	1					CILK1
CITED2	1					CITED2
CKAP2-DT	1					CKAP2-DT
CKAP2LP1	1					CKAP2LP1
CKLF	1					CKLF
CKS2	1					CKS2
CLCN4	1					CLCN4
CLDN24	1					CLDN24
CLEC1A	1					CLEC1A
CLEC2B	1					CLEC2B
CLEC4A	1					CLEC4A
CLEC4C	1					CLEC4C
CLEC4OP	1					CLEC4OP
CLEC6A	1					CLEC6A
CLIC1	1					CLIC1
CLIC4	1					CLIC4
CLINT1	1					CLINT1
CLIP1	1					CLIP1
CLK2	1					CLK2
CLLU1	1					CLLU1
CLN6	1					CLN6
CLNK	1					CLNK
CLP1	1					CLP1
CLPX	1					CLPX
CLRN1-AS1	1					CLRN1-AS1
CLXN	1					CLXN
CMBL	1					CMBL
CMTM1	1					CMTM1
CNDP2	1					CNDP2
CNEP1R1	1					CNEP1R1
CNNM3	1					CNNM3
CNOT10	1					CNOT10
CNOT6	1					CNOT6
CNPY3	1					CNPY3
CNR2	1					CNR2
CNST	1					CNST
CNTLN	1					CNTLN
CNTNAP4	1					CNTNAP4
CNTROB	1					CNTROB
COG1	1					COG1
COG2	1					COG2
COG4	1					COG4
COG8	1					COG8
COL26A1	1					COL26A1
COL4A3	1					COL4A3
COL4A4	1					COL4A4
COL5A1	1					COL5A1
COL5A3	1					COL5A3
COL9A2	1					COL9A2
COLQ	1					COLQ
COMMD6	1					COMMD6
COMMD8	1					COMMD8
COPDA1	1					COPDA1
COPG1	1					COPG1
COPG2	1					COPG2
COPS2	1					COPS2
COPS7A	1					COPS7A
COPS9	1					COPS9
COQ10A	1					COQ10A
COQ9	1					COQ9
CORIN	1					CORIN
COX17	1					COX17
COX7A2	1					COX7A2
COX7B	1					COX7B
COX7C	1					COX7C
CPA3	1					CPA3
CPEB3	1					CPEB3
CPEB4	1					CPEB4
CPLX2	1					CPLX2
CPNE1	1					CPNE1
CPNE8	1					CPNE8
CPT2	1					CPT2
CR1	1					CR1
CRACDL	1					CRACDL
CRB2	1					CRB2
CRCP	1					CRCP
CREB3L4	1					CREB3L4
CREB5	1					CREB5
CRHBP	1					CRHBP
CRLF3	1					CRLF3
CRLS1	1					CRLS1
CRNKL1	1					CRNKL1
CRY2	1					CRY2
CRYBG1	1					CRYBG1
CSF1R	1					CSF1R
CSNK1G3	1					CSNK1G3
CST7	1					CST7
CSTA	1					CSTA
CTBP1	1					CTBP1
CTDNEP1P1	1					CTDNEP1P1
CTNNA2	1					CTNNA2
CTNNB1	1					CTNNB1
CTNNBL1	1					CTNNBL1
CTNS	1					CTNS
CTPS2	1					CTPS2
CTR9	1					CTR9
CUL4A	1					CUL4A
CUTA	1					CUTA
CXCR6	1					CXCR6
CXXC5	1					CXXC5
CYB561A3	1					CYB561A3
CYB5A	1					CYB5A
CYB5B	1					CYB5B
CYBB	1					CYBB
CYP11A1	1					CYP11A1
CYP2E1	1					CYP2E1
CYP2U1	1					CYP2U1
CYSLTR2	1					CYSLTR2
CYTH1	1					CYTH1
CYTH3	1					CYTH3
CZIB	1					CZIB
DACH1	1					DACH1
DAPK2	1					DAPK2
DAPK3	1					DAPK3
DAPP1	1					DAPP1
DARS1-AS1	1					DARS1-AS1
DAZAP2	1					DAZAP2
DBI	1					DBI
DBN1	1					DBN1
DBP	1					DBP
DCAF1	1					DCAF1
DCAF12	1					DCAF12
DCAF16	1					DCAF16
DCAF4L1	1					DCAF4L1
DCAF6	1					DCAF6
DCLK2	1					DCLK2
DCN	1					DCN
DCP2	1					DCP2
DCUN1D1	1					DCUN1D1
DDHD1-DT	1					DDHD1-DT
DDOST	1					DDOST
DDR1	1					DDR1
DDX11L10	1					DDX11L10
DDX19B	1					DDX19B
DDX23	1					DDX23
DDX24	1					DDX24
DDX27	1					DDX27
DDX31	1					DDX31
DDX41	1					DDX41
DEFA8P	1					DEFA8P
DENND11	1					DENND11
DENND1B	1					DENND1B
DENND2B	1					DENND2B
DEPDC1	1					DEPDC1
DEPDC1B	1					DEPDC1B
DEPDC5	1					DEPDC5
DESI1	1					DESI1
DET1	1					DET1
DFFA	1					DFFA
DGKG	1					DGKG
DHCR24	1					DHCR24
DHFR	1					DHFR
DHODH	1					DHODH
DHRS12	1					DHRS12
DHRS13	1					DHRS13
DHRS9	1					DHRS9
DHX16	1					DHX16
DHX29	1					DHX29
DHX38	1					DHX38
DHX8	1					DHX8
DICER1	1					DICER1
DIPK2A	1					DIPK2A
DISP1	1					DISP1
DISP2	1					DISP2
DKC1	1					DKC1
DLEU2	1					DLEU2
DLEU7	1					DLEU7
DLG2	1					DLG2
DLG5	1					DLG5
DLGAP1-AS3	1					DLGAP1-AS3
DLGAP4-AS1	1					DLGAP4-AS1
DLGAP5	1					DLGAP5
DMAP1	1					DMAP1
DMD	1					DMD
DMKN	1					DMKN
DNAAF11	1					DNAAF11
DNAH2	1					DNAH2
DNAH6	1					DNAH6
DNAI3	1					DNAI3
DNAJA3	1					DNAJA3
DNAJB1	1					DNAJB1
DNAJC14	1					DNAJC14
DNAJC19P5	1					DNAJC19P5
DNAJC3	1					DNAJC3
DNAJC3-DT	1					DNAJC3-DT
DNAL4	1					DNAL4
DOCK1	1					DOCK1
DOCK7-DT	1					DOCK7-DT
DOK4	1					DOK4
DOLK	1					DOLK
DOLPP1	1					DOLPP1
DPEP2	1					DPEP2
DPEP3	1					DPEP3
DPF2	1					DPF2
DPH3	1					DPH3
DPH7	1					DPH7
DPRXP2	1					DPRXP2
DPYD	1					DPYD
DPYD-IT1	1					DPYD-IT1
DSC1	1					DSC1
DSE	1					DSE
DSG3	1					DSG3
DSN1	1					DSN1
DSTN	1					DSTN
DSTYK	1					DSTYK
DTHD1	1					DTHD1
DUS2	1					DUS2
DUSP11	1					DUSP11
DUSP2	1					DUSP2
DUX4L50	1					DUX4L50
DYNLT1	1					DYNLT1
DYSF	1					DYSF
DZANK1	1					DZANK1
E2F6P4	1					E2F6P4
E2F8	1					E2F8
EARS2	1					EARS2
EBLN2	1					EBLN2
ECHDC1	1					ECHDC1
ECHS1	1					ECHS1
ECT2	1					ECT2
EDA2R	1					EDA2R
EDNRB	1					EDNRB
EEF1A1P48	1					EEF1A1P48
EEF1DP3	1					EEF1DP3
EEF2K	1					EEF2K
EEIG2	1					EEIG2
EEPD1	1					EEPD1
EFCAB2	1					EFCAB2
EFHC1	1					EFHC1
EFNB1	1					EFNB1
EFTUD2	1					EFTUD2
EHD3	1					EHD3
EHMT2	1					EHMT2
EID1	1					EID1
EID3	1					EID3
EIF1	1					EIF1
EIF1AD	1					EIF1AD
EIF1B	1					EIF1B
EIF2AK1	1					EIF2AK1
EIF2B1	1					EIF2B1
EIF2B5	1					EIF2B5
EIF3J	1					EIF3J
EIF3L	1					EIF3L
EIF4B	1					EIF4B
EIF4G2	1					EIF4G2
EIF4G3	1					EIF4G3
EIF4H	1					EIF4H
EIF5A2	1					EIF5A2
ELAC2	1					ELAC2
ELANE	1					ELANE
ELAVL1	1					ELAVL1
ELF2	1					ELF2
ELFN1	1					ELFN1
ELMO1	1					ELMO1
ELOC	1					ELOC
ELOVL6	1					ELOVL6
ELP1	1					ELP1
EMD	1					EMD
EME1	1					EME1
EMG1	1					EMG1
EMILIN2	1					EMILIN2
EMP1	1					EMP1
ENDOV	1					ENDOV
ENHO	1					ENHO
ENKUR	1					ENKUR
ENPP2	1					ENPP2
ENPP3	1					ENPP3
EOGT	1					EOGT
EPAS1	1					EPAS1
EPB42	1					EPB42
EPHA2	1					EPHA2
EPHB1	1					EPHB1
EPHX2	1					EPHX2
EPN2	1					EPN2
EPS8	1					EPS8
ERCC3	1					ERCC3
ERGIC1	1					ERGIC1
ERGIC2	1					ERGIC2
ERRFI1	1					ERRFI1
ERVH48-1	1					ERVH48-1
ESPNL	1					ESPNL
ESS2	1					ESS2
ESYT1	1					ESYT1
ETFA	1					ETFA
ETV3	1					ETV3
EVC2	1					EVC2
EVI2A	1					EVI2A
EXD2	1					EXD2
EXOC6	1					EXOC6
EXOSC10	1					EXOSC10
EXOSC2	1					EXOSC2
F8	1					F8
FAAH	1					FAAH
FADS1	1					FADS1
FAF2	1					FAF2
FAM104A	1					FAM104A
FAM104B	1					FAM104B
FAM120B	1					FAM120B
FAM131B-AS2	1					FAM131B-AS2
FAM13A	1					FAM13A
FAM151B	1					FAM151B
FAM157A	1					FAM157A
FAM157B	1					FAM157B
FAM157C	1					FAM157C
FAM157D	1					FAM157D
FAM172A	1					FAM172A
FAM200B	1					FAM200B
FAM210B	1					FAM210B
FAM220A	1					FAM220A
FAM221B	1					FAM221B
FAM228B	1					FAM228B
FAM3D	1					FAM3D
FAM78A	1					FAM78A
FAM85B	1					FAM85B
FAM86EP	1					FAM86EP
FAM8A1	1					FAM8A1
FANCB	1					FANCB
FAR1	1					FAR1
FARP1	1					FARP1
FARP2	1					FARP2
FBP1	1					FBP1
FBXL4	1					FBXL4
FBXL5	1					FBXL5
FBXO11	1					FBXO11
FBXO21	1					FBXO21
FBXO30	1					FBXO30
FBXO38-DT	1					FBXO38-DT
FBXO42	1					FBXO42
FBXW11	1					FBXW11
FBXW7	1					FBXW7
FCAR	1					FCAR
FCER1A	1					FCER1A
FCER1G	1					FCER1G
FCGBP	1					FCGBP
FCGRT	1					FCGRT
FCHO2	1					FCHO2
FCMR	1					FCMR
FCRLA	1					FCRLA
FDXACB1	1					FDXACB1
FECH	1					FECH
FEM1C	1					FEM1C
FERMT2	1					FERMT2
FFAR2	1					FFAR2
FGD4	1					FGD4
FGFR1OP2	1					FGFR1OP2
FGFR2	1					FGFR2
FH	1					FH
FHIP2A	1					FHIP2A
FHL2	1					FHL2	Overlapping gene found in Bergsma & Rogeava
FICD	1					FICD
FIP1L1	1					FIP1L1
FKBP9	1					FKBP9
FLT3	1					FLT3
FLT4	1					FLT4
FMOD	1					FMOD
FN1	1					FN1
FN3KRP	1					FN3KRP
FNDC3A	1					FNDC3A
FNDC3B	1					FNDC3B
FOLR2	1					FOLR2
FOLR3	1					FOLR3
FOXN2	1					FOXN2
FOXN3	1					FOXN3
FOXO3	1					FOXO3
FOXP1	1					FOXP1
FSD1	1					FSD1
FSD1L	1					FSD1L
FSTL4	1					FSTL4
FTH1	1					FTH1
FTSJ3	1					FTSJ3
FUBP3	1					FUBP3
FUNDC2	1					FUNDC2
FUT4	1					FUT4
FUZ	1					FUZ
FXN	1					FXN
FXR2	1					FXR2
FXYD6-AS1	1					FXYD6-AS1
FYB1	1					FYB1
GALC	1					GALC
GALNT3	1					GALNT3
GALNT7	1					GALNT7
GANAB	1					GANAB
GARRE1	1					GARRE1
GAS2L3	1					GAS2L3
GASK1B-AS1	1					GASK1B-AS1
GATM	1					GATM
GBGT1	1					GBGT1
GCA	1					GCA
GCC1	1					GCC1
GCDH	1					GCDH
GCNT1	1					GCNT1
GCSAML	1					GCSAML
GDE1	1					GDE1
GDF7	1					GDF7
GEMIN4	1					GEMIN4
GEMIN5	1					GEMIN5
GFAP	1					GFAP
GFOD1	1					GFOD1
GFUS	1					GFUS
GGA2	1					GGA2
GGT5	1					GGT5
GIGYF2	1					GIGYF2
GIMAP2	1					GIMAP2
GINS3	1					GINS3
GK	1					GK
GK-IT1	1					GK-IT1
GLE1	1					GLE1
GLYATL1P2	1					GLYATL1P2
GMEB1	1					GMEB1
GMEB2	1					GMEB2
GMFG	1					GMFG
GMPR	1					GMPR
GNAL	1					GNAL
GNE	1					GNE
GNG10	1					GNG10
GNL1	1					GNL1
GNPTG	1					GNPTG
GOLGA2	1					GOLGA2
GOLGA5P1	1					GOLGA5P1
GOLGA6L2	1					GOLGA6L2
GOLM2	1					GOLM2
GOT2	1					GOT2
GPATCH1	1					GPATCH1
GPATCH8	1					GPATCH8
GPD1L	1					GPD1L
GPHN	1					GPHN
GPM6B	1					GPM6B
GPN2	1					GPN2
GPR141	1					GPR141
GPR141BP	1					GPR141BP
GPR174	1					GPR174
GPR27	1					GPR27
GPR34	1					GPR34
GPR63	1					GPR63
GPR65	1					GPR65
GPR78	1					GPR78
GPRASP1	1					GPRASP1
GPRIN3	1					GPRIN3
GPT2	1					GPT2
GPX3	1					GPX3
GRAP	1					GRAP
GRB10	1					GRB10
GRID1	1					GRID1
GRIK3	1					GRIK3
GRIN2B	1					GRIN2B
GSK3B	1					GSK3B
GSK3B-DT	1					GSK3B-DT
GSKIP	1					GSKIP
GSS	1					GSS
GSTM2	1					GSTM2
GSTO1	1					GSTO1
GTF2F1	1					GTF2F1
GTF2H2C	1					GTF2H2C
GTF2IRD2B	1					GTF2IRD2B
GTF3C1	1					GTF3C1
GTF3C5	1					GTF3C5
GTSF1L	1					GTSF1L
GUCY2D	1					GUCY2D
GUSB	1					GUSB
GZMB	1					GZMB
H2AZ2	1					H2AZ2
H2BC14	1					H2BC14
H2BC26	1					H2BC26
H4C13	1					H4C13
HADH	1					HADH
HAPSTR1	1					HAPSTR1
HARS1	1					HARS1
HAT1	1					HAT1
HAUS1	1					HAUS1
HAUS4	1					HAUS4
HBEGF	1					HBEGF
HDAC1	1					HDAC1
HEATR5A	1					HEATR5A
HEBP1	1					HEBP1
HECA	1					HECA
HEPACAM2	1					HEPACAM2
HERC4	1					HERC4
HERPUD1	1					HERPUD1
HERPUD2-AS1	1					HERPUD2-AS1
HEXA	1					HEXA
HEXIM2	1					HEXIM2
HHEX	1					HHEX
HIC1	1					HIC1
HIC2	1					HIC2
HIGD1A	1					HIGD1A
HIPK1	1					HIPK1
HIPK3	1					HIPK3
HIRIP3	1					HIRIP3
HK3	1					HK3
HLA-DMA	1					HLA-DMA
HLA-DQA1	1					HLA-DQA1
HLA-DRA	1					HLA-DRA
HMCES	1					HMCES
HMCN2	1					HMCN2
HMG20A	1					HMG20A
HMGA2-AS1	1					HMGA2-AS1
HMGCS1	1					HMGCS1
HMGN2	1					HMGN2
HMGN2P3	1					HMGN2P3
HMOX1	1					HMOX1
HMOX2	1					HMOX2
HNMT	1					HNMT
HNRNPA0	1					HNRNPA0
HNRNPA1P27	1					HNRNPA1P27
HNRNPA1P45	1					HNRNPA1P45
HNRNPA1P52	1					HNRNPA1P52
HNRNPA1P6	1					HNRNPA1P6
HNRNPAB	1					HNRNPAB
HNRNPKP4	1					HNRNPKP4
HNRNPL	1					HNRNPL
HNRNPM	1					HNRNPM
HNRNPUL2	1					HNRNPUL2
HOOK3	1					HOOK3
HPGDS	1					HPGDS
HPSE	1					HPSE
HRH4	1					HRH4
HS2ST1	1					HS2ST1
HSD17B3	1					HSD17B3
HSD17B4	1					HSD17B4
HSH2D	1					HSH2D
HSP90AA1	1					HSP90AA1
HSPA9	1					HSPA9
HSPD1P11	1					HSPD1P11
HSPE1P13	1					HSPE1P13
HTATSF1P2	1					HTATSF1P2
HTR1B	1					HTR1B
HTR3B	1					HTR3B
HYCC1	1					HYCC1
HYCC2	1					HYCC2
HYI	1					HYI
IAH1	1					IAH1
ICAM2	1					ICAM2
ID3	1					ID3
IDH1	1					IDH1
IDH3B	1					IDH3B
IDI1	1					IDI1
IDI2-AS1	1					IDI2-AS1
IER3	1					IER3
IFNAR1	1					IFNAR1
IFNG	1					IFNG
IFNLR1	1					IFNLR1
IFT172	1					IFT172
IFT20	1					IFT20
IFT70A	1					IFT70A
IFTAP	1					IFTAP
IGFBP4	1					IGFBP4
IGFBP6	1					IGFBP6
IGFN1	1					IGFN1
IGHG4	1					IGHG4
IGHM	1					IGHM
IK	1					IK
IKBIP	1					IKBIP
IKZF2	1					IKZF2
IL10RB-DT	1					IL10RB-DT
IL12RB2	1					IL12RB2
IL15	1					IL15
IL16	1					IL16
IL1B	1					IL1B
IL1R1	1					IL1R1
IL1RL1	1					IL1RL1
IL2RB	1					IL2RB
IL34	1					IL34
IL3RA	1					IL3RA
IL4R	1					IL4R
ILVBL	1					ILVBL
IMMT	1					IMMT
IMP3	1					IMP3
IMP4	1					IMP4
IMPDH2	1					IMPDH2
IMPG2	1					IMPG2
INCENP	1					INCENP
ING5	1					ING5
INKA2	1					INKA2
INKA2-AS1	1					INKA2-AS1
INPP5A	1					INPP5A
INPP5B	1					INPP5B
INPP5F	1					INPP5F
INTS15	1					INTS15
INTS4	1					INTS4
INTS6	1					INTS6
INTS9	1					INTS9
IPO5P1	1					IPO5P1
IQGAP3	1					IQGAP3
IRAK3	1					IRAK3
IRAK4	1					IRAK4
IRF2-DT	1					IRF2-DT
IRF6	1					IRF6
IRF8	1					IRF8
[truncated: 1,489 more rows]
